# Supplementary material for: Circulating acetylated polyamines correlate with Covid-19 severity in cancer patients
Source: Aging (Albany NY). 2021 Sep 13;13(17):20860–85. doi: 10.18632/aging.203525 (PMC8457559; doi:10.18632/aging.203525)
Supplement: Supplementary Figures [file aging-13-203525-s001.pdf]

## SUPPLEMENTARY FIGURES

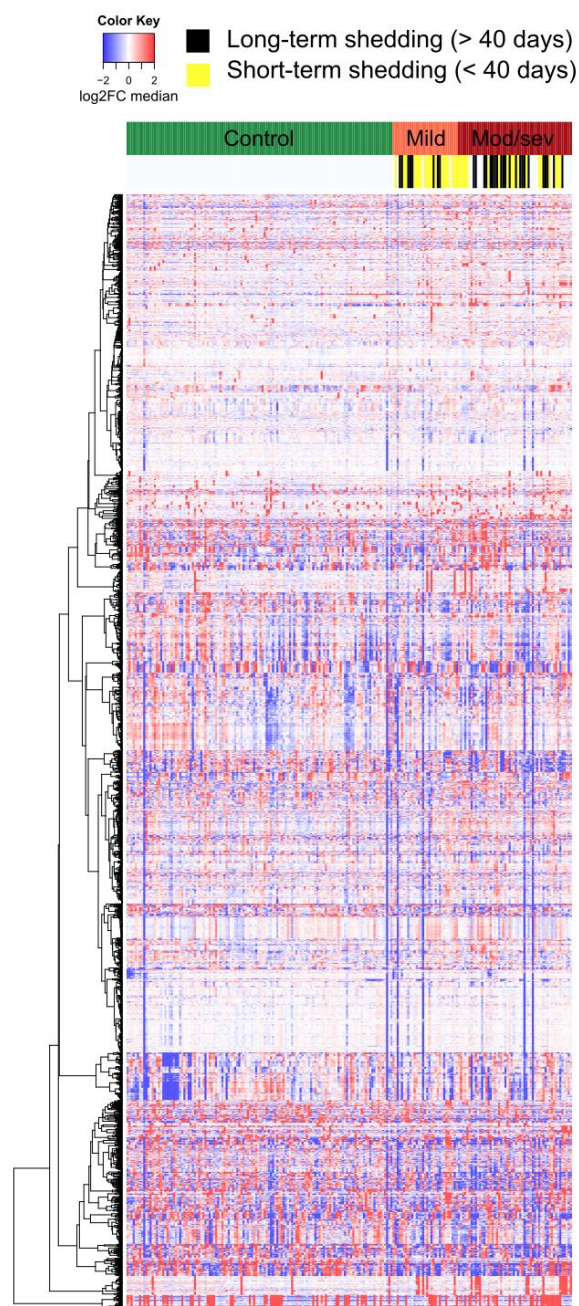

**Supplementary Figure 1. Heatmap representing the serum metabolome of each individual cancer patients clustered by clinical severity of Covid-19.** Untargeted metabolomic data on 211 serum samples from 204 patients were normalized area of non-identified mass spectrometric peaks. Results are listed in Supplementary Table 2.

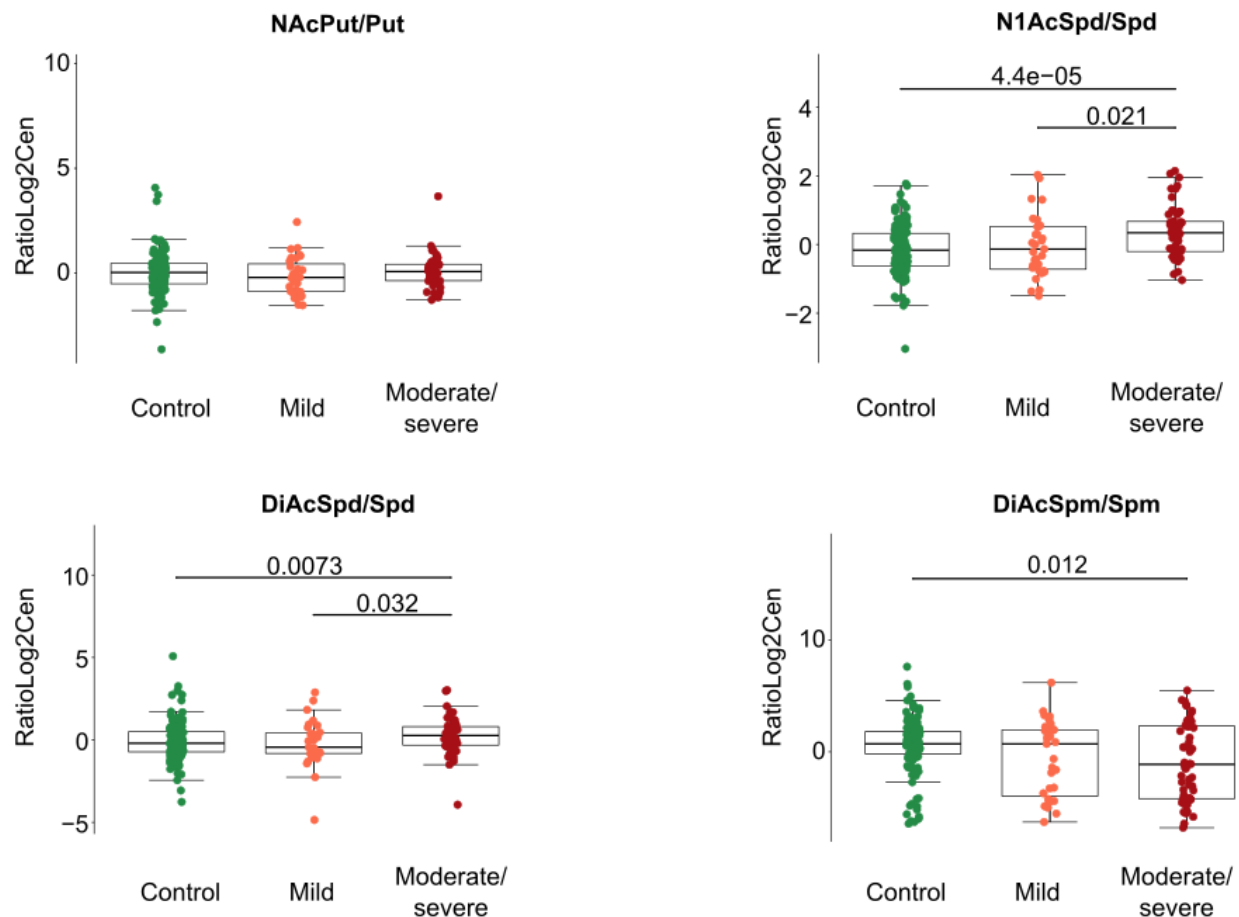

**Supplementary Figure 2. Ratios of acetylated over non-acetylated polyamines in cancer patients with different levels of Covid-19 severity.** The ratios were calculated as  $\text{Log}^2\text{Cen}$  of the areas of mass spectrometric peaks of  $\text{N}_1$ -acetylputrescine (NAcPut) over putrescine (Put),  $\text{N}_1$ -acetylspermidine ( $\text{N}_1\text{AcSpd}$ ) or  $\text{N}_1, \text{N}_8$ -diacetylspermidine (DiAcSpd) over spermidine (Spd), or  $\text{N}_1, \text{N}_{12}$ -diacetylspermine (DiAcSpm) over spermine (Spm). Black bars indicate p-values.

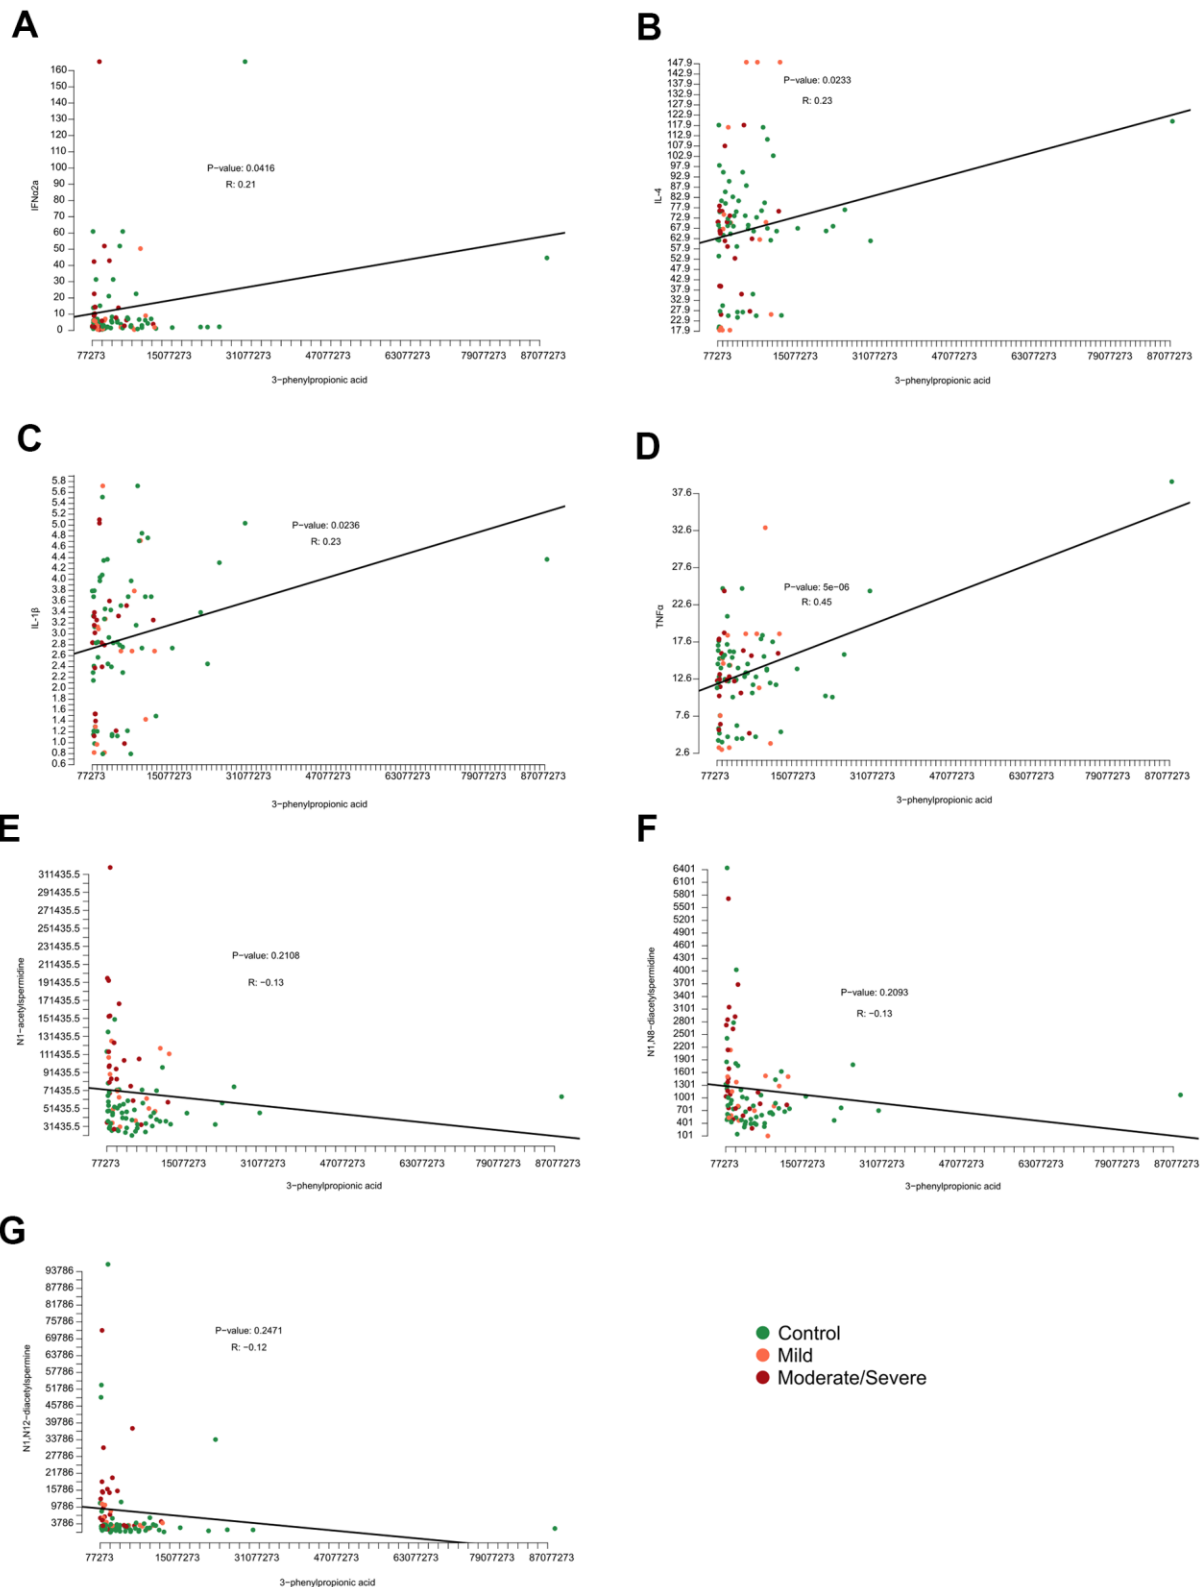

**Supplementary Figure 3. Correlation of 3-phenylpropionic acid with immune parameters.** Levels of 3-phenylpropionic acid was plotted against the concentrations of (A) interferon- $\alpha$ 2a (IFN $\alpha$ 2a), (B) interleukin-4 (IL-4), (C) Interleukin-1 $\beta$  (IL-1 $\beta$ ), and (D) tumor necrosis factor alpha (TNF $\alpha$ ), (E) N<sub>1</sub>-acetylspermidine, (F) N<sub>1</sub>,N<sub>8</sub>-diacetylspermidine and (G) N<sub>1</sub>,N<sub>12</sub>-diacetylspermine.

**A**

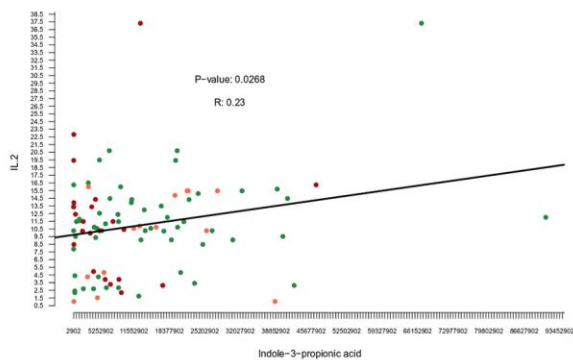

**B**

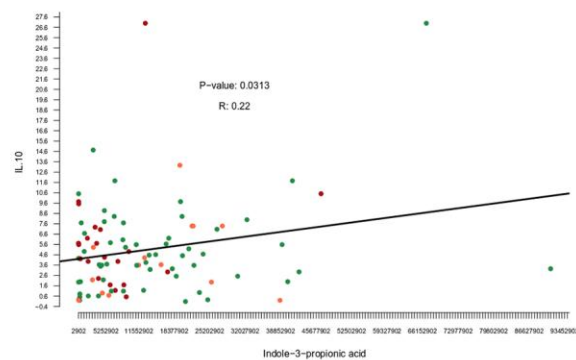

**C**

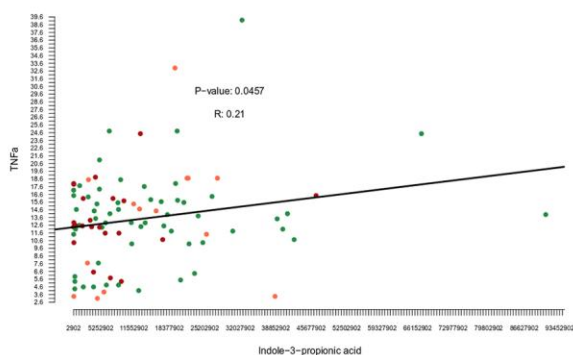

● Control  
● Mild  
● Moderate/Severe

**Supplementary Figure 4. Correlation of indole-3-propionic acid with immune parameters.** Levels of indole-3-propionic acid was plotted against the concentrations of (A) interleukin-2 (IL-2), (B) interleukin-10 (IL-10), (C) tumor necrosis factor alpha (TNFα).

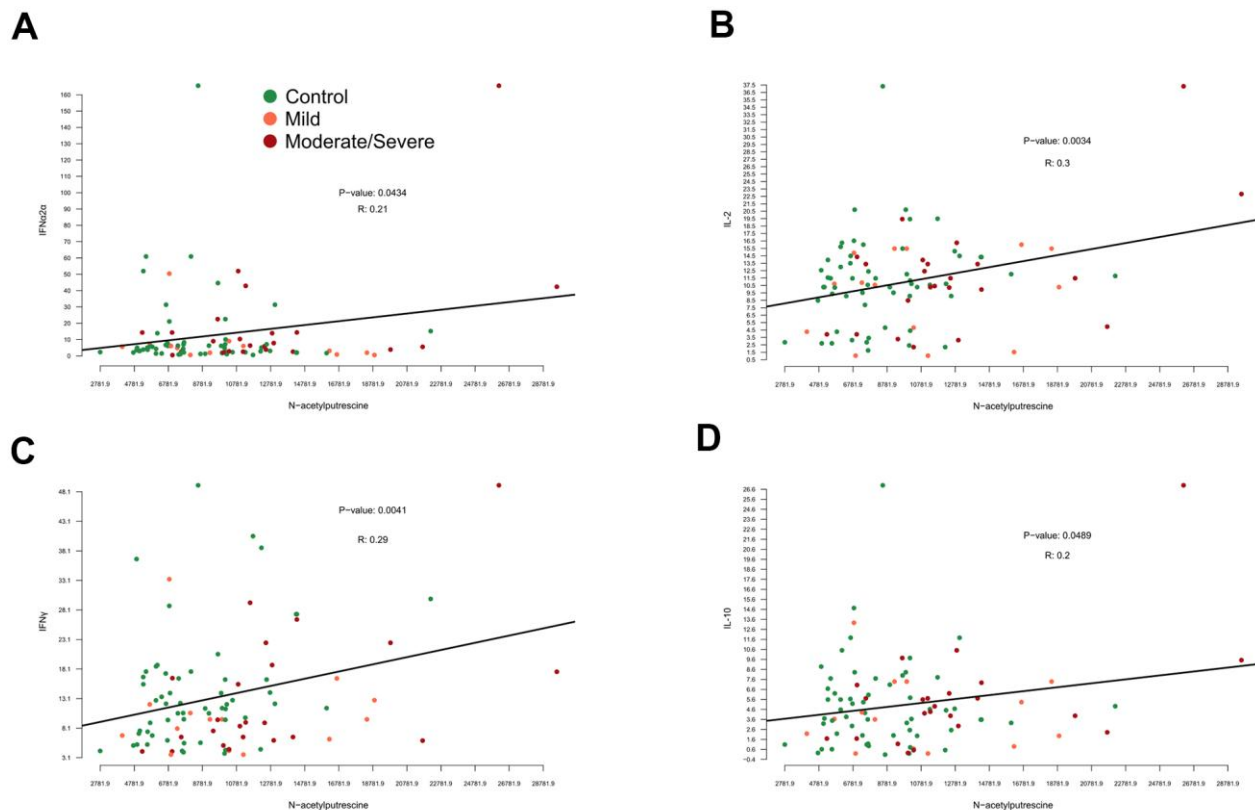

**Supplementary Figure 5. Correlation of N-acetylputrescine with immune parameters.** Levels of N-acetylputrescine were plotted against the concentration of (A) interferon- $\alpha$ 2a (IFN $\alpha$ 2a), (B) interleukin-2 (IL-2), (C) interferon- $\gamma$  (IFN $\gamma$ ) and (D) interleukin-10 (IL-10).

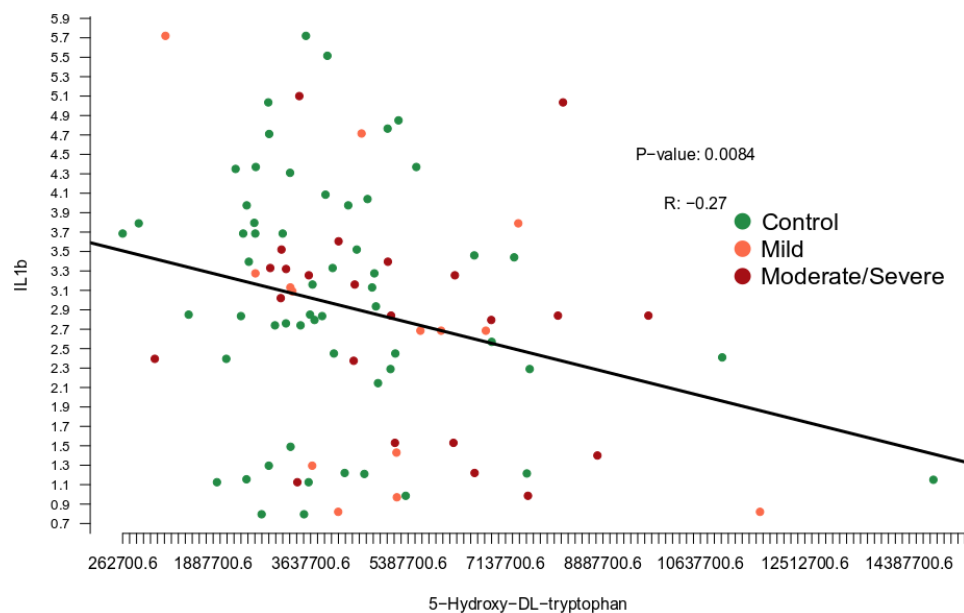

**Supplementary Figure 6. Correlation of 5-Hydroxy-DL-tryptophan with interleukin-1 $\beta$  (IL-1 $\beta$ ) levels.** Levels of 5-Hydroxy-DL-tryptophan were plotted against the concentration of Interleukin-1 $\beta$  (IL-1 $\beta$ ).
