# Supplementary material for: Circulating acetylated polyamines correlate with Covid-19 severity in cancer patients
Source: Aging (Albany NY). 2021 Sep 13;13(17):20860–85. doi: 10.18632/aging.203525 (PMC8457559; doi:10.18632/aging.203525)
Supplement: Supplementary Table 1 [file aging-13-203525-s002.xls]

## Sheet: SampleInfos
Supplementary Table 1. Targeted metabolomics.
Sid	sType	InjOrder	Grp	Color
BlM_pre	Bl	6	-	-
BlM_post	Bl	261	-	-
QC_5a	QC	37	QC	#969696
QC_5b	QC	57	QC	#969696
QC_6e	QC	62	QC	#969696
QC_4a	QC	72	QC	#969696
QC_5c	QC	77	QC	#969696
QC_6f	QC	84	QC	#969696
QC_4b	QC	91	QC	#969696
QC_6a	QC	96	QC	#969696
QC_5d	QC	99	QC	#969696
QC_6b	QC	113	QC	#969696
QC_5e	QC	118	QC	#969696
QC_5ee	QC	120	QC	#969696
QC_4c	QC	128	QC	#969696
QC_6c	QC	130	QC	#969696
QC_6ax	QC	133	QC	#969696
QC_5f	QC	140	QC	#969696
QC_4d	QC	146	QC	#969696
QC_6d	QC	148	QC	#969696
QC_4e	QC	167	QC	#969696
QC_4cc	QC	186	QC	#969696
QC_4f	QC	207	QC	#969696
QC_7a	QC	209	QC	#969696
QC_7b	QC	225	QC	#969696
QC_6aa	QC	232	QC	#969696
QC_5aa	QC	236	QC	#969696
QC_6dd	QC	242	QC	#969696
QC_7c	QC	243	QC	#969696
QC_7aa	QC	245	QC	#969696
QC_7bb	QC	247	QC	#969696
QC_5bb	QC	257	QC	#969696
QC_6bb	QC	260	QC	#969696
QC_7d	QC	265	QC	#969696
Control-4_1	Sa	7	Control	#238B45
Control-6_2	Sa	8	Control	#238B45
Mild-7_3	Sa	9	Mild	#FB6A4A
Control-8_4	Sa	10	Control	#238B45
Moderate-10_5	Sa	11	Moderate/Severe	#A50F15
Control-12_6	Sa	12	Control	#238B45
Moderate-13_7	Sa	13	Moderate/Severe	#A50F15
Mild-14_9	Sa	14	Mild	#FB6A4A
Control-16_10	Sa	15	Control	#238B45
Control-17_11	Sa	16	Control	#238B45
Mild-18_12	Sa	17	Mild	#FB6A4A
Control-19_13	Sa	18	Control	#238B45
Moderate-13_8	Sa	19	Moderate/Severe	#A50F15
Control-20_14	Sa	20	Control	#238B45
Control-21_15	Sa	21	Control	#238B45
Moderate-26_20	Sa	22	Moderate/Severe	#A50F15
Control-22_16	Sa	23	Control	#238B45
Control-24_17	Sa	24	Control	#238B45
Mild-25_18	Sa	25	Mild	#FB6A4A
Moderate-26_19	Sa	26	Moderate/Severe	#A50F15
Control-27_21	Sa	27	Control	#238B45
Severe-47_36	Sa	28	Moderate/Severe	#A50F15
Control-28_22	Sa	29	Control	#238B45
Control-29_23	Sa	30	Control	#238B45
Mild-30_24	Sa	31	Mild	#FB6A4A
Control-31_25	Sa	32	Control	#238B45
Control-32_26	Sa	33	Control	#238B45
Control-34_27	Sa	34	Control	#238B45
Control-35_28	Sa	35	Control	#238B45
Severe-47_35	Sa	36	Moderate/Severe	#A50F15
Control-36_29	Sa	38	Control	#238B45
Control-37_30	Sa	39	Control	#238B45
Control-38_31	Sa	40	Control	#238B45
Control-39_32	Sa	41	Control	#238B45
Moderate-40_33	Sa	42	Moderate/Severe	#A50F15
Control-41_34	Sa	43	Control	#238B45
Severe-47_37	Sa	44	Moderate/Severe	#A50F15
Control-49_38	Sa	45	Control	#238B45
Control-50_39	Sa	46	Control	#238B45
Control-51_40	Sa	47	Control	#238B45
Moderate-68_45	Sa	48	Moderate/Severe	#A50F15
Control-53_41	Sa	49	Control	#238B45
Control-57_42	Sa	50	Control	#238B45
Control-58_43	Sa	51	Control	#238B45
Mild-67_44	Sa	52	Mild	#FB6A4A
Control-70_46	Sa	53	Control	#238B45
Mild-79_47	Sa	54	Mild	#FB6A4A
Control-91_48	Sa	55	Control	#238B45
Control-100_49	Sa	56	Control	#238B45
Control-101_50	Sa	58	Control	#238B45
Control-102_51	Sa	59	Control	#238B45
Control-103_52	Sa	60	Control	#238B45
Control-104_53	Sa	61	Control	#238B45
Control-105_54	Sa	63	Control	#238B45
Control-106_55	Sa	64	Control	#238B45
Control-107_56	Sa	65	Control	#238B45
Control-109_57	Sa	66	Control	#238B45
Control-111_58	Sa	67	Control	#238B45
Control-114_59	Sa	68	Control	#238B45
Control-115_60	Sa	69	Control	#238B45
Mild-128_68	Sa	70	Mild	#FB6A4A
Control-116_61	Sa	71	Control	#238B45
Control-121_62	Sa	73	Control	#238B45
Control-122_63	Sa	74	Control	#238B45
Control-123_64	Sa	75	Control	#238B45
Control-126_65	Sa	76	Control	#238B45
Control-127_66	Sa	78	Control	#238B45
Mild-128_67	Sa	79	Mild	#FB6A4A
Mild-128_69	Sa	80	Mild	#FB6A4A
Control-130_70	Sa	81	Control	#238B45
Control-131_71	Sa	82	Control	#238B45
Mild-133_73	Sa	85	Mild	#FB6A4A
Control-134_74	Sa	86	Control	#238B45
Mild-137_75	Sa	87	Mild	#FB6A4A
Control-138_76	Sa	88	Control	#238B45
Control-139_77	Sa	89	Control	#238B45
Control-145_78	Sa	90	Control	#238B45
Control-147_79	Sa	92	Control	#238B45
Control-148_80	Sa	93	Control	#238B45
Mild-149_81	Sa	94	Mild	#FB6A4A
Control-150_82	Sa	95	Control	#238B45
Control-152_84	Sa	98	Control	#238B45
Control-153_85	Sa	100	Control	#238B45
Control-154_86	Sa	101	Control	#238B45
Control-155_87	Sa	102	Control	#238B45
Control-156_88	Sa	103	Control	#238B45
Control-157_89	Sa	104	Control	#238B45
Control-158_90	Sa	105	Control	#238B45
Control-159_91	Sa	106	Control	#238B45
Control-160_92	Sa	107	Control	#238B45
Control-164_94	Sa	109	Control	#238B45
Control-165_95	Sa	110	Control	#238B45
Control-166_96	Sa	111	Control	#238B45
Control-167_97	Sa	112	Control	#238B45
Control-168_98	Sa	114	Control	#238B45
Control-169_99	Sa	115	Control	#238B45
Control-170_100	Sa	116	Control	#238B45
Control-171_101	Sa	117	Control	#238B45
Moderate-173_103	Sa	121	Moderate/Severe	#A50F15
Moderate-173_104	Sa	122	Moderate/Severe	#A50F15
Control-174_105	Sa	123	Control	#238B45
Moderate-177_109	Sa	124	Moderate/Severe	#A50F15
Control-175_106	Sa	125	Control	#238B45
Moderate-177_108	Sa	126	Moderate/Severe	#A50F15
Control-176_107	Sa	127	Control	#238B45
Moderate-177_110	Sa	129	Moderate/Severe	#A50F15
Control-178_111	Sa	131	Control	#238B45
Control-179_112	Sa	132	Control	#238B45
Control-180_113	Sa	134	Control	#238B45
Control-182_114	Sa	135	Control	#238B45
Control-184_115	Sa	136	Control	#238B45
Control-185_116	Sa	137	Control	#238B45
Control-187_117	Sa	138	Control	#238B45
Control-188_118	Sa	139	Control	#238B45
Control-189_119	Sa	141	Control	#238B45
Control-190_120	Sa	142	Control	#238B45
Control-192_121	Sa	143	Control	#238B45
Control-194_123	Sa	145	Control	#238B45
Mild-195_124	Sa	147	Mild	#FB6A4A
Severe-197_125	Sa	149	Moderate/Severe	#A50F15
Moderate-201_128	Sa	150	Moderate/Severe	#A50F15
Control-198_126	Sa	151	Control	#238B45
Moderate-201_129	Sa	153	Moderate/Severe	#A50F15
Mild-203_130	Sa	154	Mild	#FB6A4A
Control-204_131	Sa	155	Control	#238B45
Control-205_132	Sa	156	Control	#238B45
Control-206_133	Sa	157	Control	#238B45
Control-208_135	Sa	159	Control	#238B45
Control-209_136	Sa	160	Control	#238B45
Control-210_137	Sa	161	Control	#238B45
Control-211_138	Sa	162	Control	#238B45
Control-212_139	Sa	163	Control	#238B45
Control-213_140	Sa	164	Control	#238B45
Control-214_141	Sa	165	Control	#238B45
Control-215_142	Sa	166	Control	#238B45
Moderate-462_187	Sa	168	Moderate/Severe	#A50F15
Control-216_143	Sa	169	Control	#238B45
Control-217_144	Sa	170	Control	#238B45
Moderate-258_168	Sa	171	Moderate/Severe	#A50F15
Control-219_145	Sa	172	Control	#238B45
Severe-467_190	Sa	173	Moderate/Severe	#A50F15
Control-220_146	Sa	174	Control	#238B45
Control-221_147	Sa	175	Control	#238B45
Severe-272_170	Sa	176	Moderate/Severe	#A50F15
Control-222_148	Sa	177	Control	#238B45
Severe-272_171	Sa	178	Moderate/Severe	#A50F15
Control-223_149	Sa	179	Control	#238B45
Control-224_150	Sa	180	Control	#238B45
Severe-272_173	Sa	181	Moderate/Severe	#A50F15
Control-225_151	Sa	182	Control	#238B45
Severe-427_183	Sa	183	Moderate/Severe	#A50F15
Control-226_152	Sa	184	Control	#238B45
Moderate-305_175	Sa	185	Moderate/Severe	#A50F15
Control-227_153	Sa	187	Control	#238B45
Moderate-258_169	Sa	188	Moderate/Severe	#A50F15
Control-228_154	Sa	189	Control	#238B45
Severe-476_197	Sa	190	Moderate/Severe	#A50F15
Severe-395_178	Sa	191	Moderate/Severe	#A50F15
Control-229_155	Sa	192	Control	#238B45
Mild-480_201	Sa	193	Mild	#FB6A4A
Severe-471_193	Sa	194	Moderate/Severe	#A50F15
Control-230_156	Sa	195	Control	#238B45
Moderate-305_176	Sa	196	Moderate/Severe	#A50F15
Moderate-481_202	Sa	197	Moderate/Severe	#A50F15
Control-231_157	Sa	198	Control	#238B45
Severe-425_182	Sa	199	Moderate/Severe	#A50F15
Mild-475_196	Sa	200	Mild	#FB6A4A
Control-233_158	Sa	201	Control	#238B45
Moderate-466_189	Sa	202	Moderate/Severe	#A50F15
Moderate-479_200	Sa	203	Moderate/Severe	#A50F15
Control-234_159	Sa	204	Control	#238B45
Moderate-469_191	Sa	205	Moderate/Severe	#A50F15
Mild-465_188	Sa	206	Mild	#FB6A4A
Severe-423_181	Sa	208	Moderate/Severe	#A50F15
Control-236_160	Sa	210	Control	#238B45
Mild-252_167	Sa	211	Mild	#FB6A4A
Moderate-477_198	Sa	212	Moderate/Severe	#A50F15
Control-237_161	Sa	213	Control	#238B45
Moderate-305_177	Sa	214	Moderate/Severe	#A50F15
Control-238_162	Sa	215	Control	#238B45
Moderate-461_186	Sa	216	Moderate/Severe	#A50F15
Control-239_163	Sa	217	Control	#238B45
Mild-442_184	Sa	218	Mild	#FB6A4A
Moderate-472_194	Sa	219	Moderate/Severe	#A50F15
Control-240_164	Sa	220	Control	#238B45
Moderate-443_185	Sa	221	Moderate/Severe	#A50F15
Moderate-478_199	Sa	222	Moderate/Severe	#A50F15
Control-244_165	Sa	223	Control	#238B45
Moderate-470_192	Sa	224	Moderate/Severe	#A50F15
Control-245_166	Sa	226	Control	#238B45
Severe-272_172	Sa	227	Moderate/Severe	#A50F15
Mild-278_174	Sa	228	Mild	#FB6A4A
Moderate-483_204	Sa	230	Moderate/Severe	#A50F15
Moderate-419_180	Sa	231	Moderate/Severe	#A50F15
Mild-482_203	Sa	233	Mild	#FB6A4A
Moderate-473_195	Sa	234	Moderate/Severe	#A50F15
Mild-485_206	Sa	237	Mild	#FB6A4A
Mild-488_209	Sa	240	Mild	#FB6A4A
Moderate-489_210	Sa	241	Moderate/Severe	#A50F15
Mild-490_211	Sa	244	Mild	#FB6A4A
Severe-491_212	Sa	246	Moderate/Severe	#A50F15
Mild-492_213	Sa	248	Mild	#FB6A4A
Mild-493_214	Sa	249	Mild	#FB6A4A
Severe-494_215	Sa	250	Moderate/Severe	#A50F15
Severe-494_216	Sa	251	Moderate/Severe	#A50F15
Mild-495_217	Sa	252	Mild	#FB6A4A
Mild-496_218	Sa	253	Mild	#FB6A4A
Mild-497_219	Sa	254	Mild	#FB6A4A
Moderate-498_220	Sa	255	Moderate/Severe	#A50F15
Severe-499_221	Sa	256	Moderate/Severe	#A50F15
Mild-500_222	Sa	258	Mild	#FB6A4A
St_SF_pre	St	1	-	-
St_PA_pre	St	2	-	-
St_BA1_pre	St	3	-	-
St_AA_pre	St	4	-	-
St_BA2_pre	St	5	-	-
St_PA_post	St	259	-	-
St_AA_post	St	262	-	-
St_BA2_post	St	263	-	-
St_BA1_post	St	264	-	-
St_SF_post	St	266	-	-

## Sheet: MetabolitesInfos
Supplementary Table 1. Targeted metabolomics.
Analyte	MetName	IsSTD	IsISO	RT	LevelAnnot	OriginalName	Class	MF	Mass	HMDB	KEGG	PC	Chebi	OGName	PCu	Method
2-aminoadipic acid@14.99-gc	2-aminoadipic acid	FALSE	FALSE	14.994	1	2-aminoadipic_acid	Amino acids	C6H11NO4	161.069	HMDB00510	C00956	469;59366488;92136	chebiId:37023	2-aminoadipic acid	469	gc
2-hydroxy-2-methylbutyric acid@3.52-sf	2-hydroxy-2-methylbutyric acid	FALSE	FALSE	3.517	1	2-hydroxy-2-methylbutyric_acid	Fatty Acyls	C5H10O3	118.063	-	-	95433	-	2-hydroxy-2-methylbutyric acid	95433	sf
2-hydroxy-3-methylbutyric acid@4.68-sf	2-hydroxy-3-methylbutyric acid	FALSE	FALSE	4.684	1	2-hydroxy-3-methylbutyric_acid	Fatty Acyls	C5H10O3	118.063	-	-	5289545	-	2-hydroxy-2-methylbutyric acid	5289545	sf
2-hydroxybutyric acid@2.49-sf	2-hydroxybutyric acid	FALSE	FALSE	2.492	1	2-hydroxybutyric_acid	Organic acids	C4H8O3	104.047	HMDB00008	C05984	440864;11266	chebiId:1148;chebiId:50613	2-hydroxybutyric acid	11266	sf
2-hydroxyethanesulfonic acid@1.02-qpneg	2-hydroxyethanesulfonic acid	FALSE	FALSE	1.02	1	2-hydroxyethanesulfonic_acid	Organic acids	C2H6O4S	125.999	HMDB03903	C05123	7866	chebiId:1157	2-Hydroxyethanesulfonate	7866	qpneg
2-hydroxyglutaric acid@8.23-sf	2-hydroxyglutaric acid	FALSE	FALSE	8.234	1	2-hydroxyglutaric_acid	Organic acids	C5H8O5	148.037	HMDB00606;HMDB59655	C02630;C01087	43	chebiId:17084	2-hydroxyglutaric acid	43	sf
2-oxoglutaric acid@13.01-gc	2-oxoglutaric acid	FALSE	FALSE	13.006	1	2-oxoglutaric_acid	Organic acids	C5H6O5	146.022	HMDB00208	C00026	51	chebiId:30915	2-oxoglutaric acid	51	gc
2-oxovaleric acid@14.29-sf	2-oxovaleric acid	FALSE	FALSE	14.294	1	2-oxovaleric_acid	-	C5H8O3	116.047	HMDB01865	C06255	74563	33033	2-oxovaleric acid	74563	sf
3-hydroxybenzoic acid@7.71-qpneg	3-hydroxybenzoic acid	FALSE	FALSE	7.713	1	3-hydroxybenzoic_acid	Unclassified	C7H6O3	138.032	HMDB02466	C00587	7420	chebiId:30764	3-hydroxybenzoic acid	7420	qpneg
3-hydroxybutyric acid@1.65-sf	3-hydroxybutyric acid	FALSE	FALSE	1.647	1	3-hydroxybutyric_acid	Organic acids	C4H8O3	104.047	HMDB00357;HMDB00011	C01089	441;92135	chebiId:10983;chebiId:17066;chebiId:20067	3-hydroxybutyric acid	441	sf
3-hydroxyglutaric acid@1.36-qpneg	3-hydroxyglutaric acid	FALSE	FALSE	1.357	1	3-hydroxyglutaric_acid	-	-	-	-	-	-	-	-	-	qpneg
3-hydroxyisovaleric acid@7.80-gc	3-hydroxyisovaleric acid	FALSE	FALSE	7.804	1	3-hydroxyisovaleric_acid	Fatty Acyls	C5H10O3	118.063	HMDB00754	-	69362	chebiId:37084	3-hydroxyisovaleric acid	69362	gc
3-indoxyl sulfuric acid@4.66-qpneg	3-indoxyl sulfuric acid	FALSE	FALSE	4.657	1	3-indoxyl_sulfuric_acid	Organic acids	C8H7NO4S	213.01	HMDB00682	-	10258	-	3-indoxyl sulfuric acid	10258	qpneg
3-methyl-2-oxovaleric acid@14.26-sf	3-methyl-2-oxovaleric acid	FALSE	FALSE	14.261	1	3-methyl-2-oxovaleric_acid	Organic acids	C6H10O3	130.063	HMDB00491	C03465;C00671	439286;47	chebiId:28654;chebiId:35932;chebiId:15614	3-methyl-2-oxovaleric acid	47	sf
3-methylglutarylcarnitine*@2.64-qppos	3-methylglutarylcarnitine*	FALSE	FALSE	2.638	1	3-methylglutarylcarnitine*	-	-	-	-	-	-	-	-	-	qppos
3-methylhistidine@16.68-gc	3-methylhistidine	FALSE	FALSE	16.682	1	3-methylhistidine	Amino acids	C7H11N3O2	169.085	HMDB00479	C01152	64969;565965	chebiId:27596	3-methylhistidine	565965	gc
3-phenylpropionic acid@10.28-qpneg	3-phenylpropionic acid	FALSE	FALSE	10.282	1	3-phenylpropionic_acid	Flavonoids	C9H10O2	150.068	HMDB00764	C05629	107	chebiId:28631	3-phenylpropionic acid	107	qpneg
4-hydroxymandelic acid@15.21-gc	4-hydroxymandelic acid	FALSE	FALSE	15.21	1	4-hydroxymandelic_acid	Unclassified	C8H8O4	168.042	HMDB00822	C11527	328	chebiId:16388	4-hydroxymandelic acid	328	gc
4-hydroxyproline@12.43-gc	4-hydroxyproline	FALSE	FALSE	12.431	1	4-hydroxyproline	Amino acids	C5H9NO3	131.058	HMDB00725	C01157	825;5810;5238478	chebiId:18095	4-hydroxyproline	5238478	gc
5-aminovaleric acid@1.09-qpneg	5-aminovaleric acid	FALSE	FALSE	1.089	1	5-aminovaleric_acid	Amino acids	C5H11NO2	117.079	HMDB03355	C00431	138;6992101	chebiId:15887	5-aminovaleric acid	138	qpneg
5-Hydroxy-DL-tryptophan@1.50-qppos	5-Hydroxy-DL-tryptophan	FALSE	FALSE	1.499	1	5-Hydroxy-DL-tryptophan	-	-	-	-	-	-	-	-	-	qppos
5-oxoproline@12.35-gc	5-oxoproline	FALSE	FALSE	12.352	1	5-oxoproline	Amino acids	C5H7NO3	129.043	HMDB00805;HMDB00267	C02237;C01879	439685;499;7405	chebiId:16010;chebiId:16924;chebiId:18183	5-oxoproline	499	gc
Acetic acid@1.65-sf	Acetic acid	FALSE	FALSE	1.65	1	Acetic_acid	Organic acids	C2H4O2	60.021	HMDB00042	C00033	176;21980959	chebiId:15366	Acetic acid	176	sf
Acetoacetic acid@12.83-sf	Acetoacetic acid	FALSE	FALSE	12.827	1	Acetoacetic_acid	Organic acids	C4H6O3	102.032	HMDB00060	C00164	96	chebiId:13705;chebiId:15344	Acetoacetic acid	96	sf
Adenine@16.19-gc	Adenine	FALSE	FALSE	16.193	1	Adenine	Bases	C5H5N5	135.054	HMDB00034	C00147	190	chebiId:16708	Adenine	190	gc
Alanine@6.89-gc	Alanine	FALSE	FALSE	6.887	1	Alanine	Amino acids	C3H7NO2	89.048	HMDB01310;HMDB00161	C00133;C00041	71080;602;5950;7311724;57383916	chebiId:15570;chebiId:16977	Alanine	57383916	gc
Allantoin@16.81-gc	Allantoin	FALSE	FALSE	16.806	1	Allantoin	Organic acids	C4H6N4O3	158.044	HMDB00462	C02350;C01551	204;439714	chebiId:15678	Allantoin	204	gc
Alpha-tocopherol@29.39-gc	Alpha-tocopherol	FALSE	FALSE	29.385	1	Alpha-tocopherol	Prenols	C29H50O2	430.381	HMDB01893	C02477	14985;2116	chebiId:18145	Alpha-tocopherol	2116	gc
Aminocaproic acid@1.27-qpneg	Aminocaproic acid	FALSE	FALSE	1.272	1	Aminocaproic_acid	Fatty Acyls	C6H13NO2	131.095	HMDB01901	C02378	564;517030	chebiId:16586;chebiId:32396	Aminocaproic acid	517030	qpneg
Anthranilic acid@13.42-gc	Anthranilic acid	FALSE	FALSE	13.423	1	Anthranilic_acid	Unclassified	C7H7NO2	137.048	HMDB01123	C00108	227;3734162	chebiId:30754	Anthranilic acid	227	gc
Arabinose@14.16-gc	Arabinose	FALSE	FALSE	14.161	1	Arabinose	Carbohydrates	C5H10O5	150.053	HMDB00646	C00216;C00259	66308;6902;439195	chebiId:17108;chebiId:46994	Arabinose	439195	gc
Arabitol@14.80-gc	Arabitol	FALSE	FALSE	14.799	1	Arabitol	Carbohydrates	C5H12O5	152.068	HMDB01851;HMDB00568	C00532;C01904	439255;94154	chebiId:18403;chebiId:18333	Arabitol	439255	gc
Arachidic acid@23.63-qpneg	Arachidic acid	FALSE	FALSE	23.63	1	Arachidic_acid	Fatty Acyls	C20H40O2	312.303	HMDB02212	C06425	10467	chebiId:28822	Arachidic acid	10467	qpneg
Arachidonic acid@20.10-qpneg	Arachidonic acid	FALSE	FALSE	20.1	1	Arachidonic_acid	Fatty Acyls	C20H32O2	304.24	HMDB01043	C00219	444899;231	chebiId:15843	Arachidonic acid	231	qpneg
Arginine@0.98-qppos	Arginine	FALSE	FALSE	0.984	1	Arginine	Amino acids	C6H14N4O2	174.112	HMDB03416;HMDB00517	C00792;C00062	71070;6322;59119146;232;5246487	chebiId:15816;chebiId:16467	Arginine	232	qppos
Asparagine@14.12-gc	Asparagine	FALSE	FALSE	14.117	1	Asparagine	Amino acids	C4H8N2O3	132.053	HMDB00168	C00152	236;6267;5247114	chebiId:17196	Asparagine	236	gc
Aspartic acid@12.36-gc	Aspartic acid	FALSE	FALSE	12.356	1	Aspartic_acid	Amino acids	C4H7NO4	133.038	HMDB06483;HMDB00191	C00402;C00049	83887;5960;424;23443619;57397078	chebiId:17364;chebiId:17053	Aspartic acid	23443619	gc
Azelaic acid@9.66-qpneg	Azelaic acid	FALSE	FALSE	9.662	1	Azelaic_acid	-	-	-	-	-	-	-	-	-	qpneg
Behenic acid@24.91-qpneg	Behenic acid	FALSE	FALSE	24.913	1	Behenic_acid	Fatty Acyls	C22H44O2	340.334	HMDB00944	C08281	8215	chebiId:23858;chebiId:28941	Behenic acid	8215	qpneg
Benzoic acid@9.49-sf	Benzoic acid	FALSE	FALSE	9.493	1	Benzoic_acid	Unclassified	C7H6O2	122.037	HMDB01870	C00180	243;20144841	chebiId:30746	Benzoic acid	20144841	sf
Beta-hydroxypyruvic acid@13.75-sf	Beta-hydroxypyruvic acid	FALSE	FALSE	13.751	1	Beta-hydroxypyruvic_acid	Organic acids	C3H4O4	104.011	HMDB01352	C00168	964	chebiId:30841	Beta-hydroxypyruvic acid	964	sf
Betaine;Valine@1.04-qppos	Betaine;Valine	FALSE	FALSE	1.042	1	Betaine__Valine	Amino acids	C5H11NO2	117.079	HMDB00043;HMDB59606;HMDB00883	C00719;C00183	247;6287;1182;5237032	chebiId:17750;chebiId:16414	Betaine;Valine	247;1182	qppos
Butanoic acid@5.35-sf	Butanoic acid	FALSE	FALSE	5.351	1	Butanoic_acid	Fatty Acyls	C4H8O2	88.052	HMDB00039	C00246	264	chebiId:30772	Butanoic acid	264	sf
Cadaverine@4.73-pa	Cadaverine	FALSE	FALSE	4.728	1	Cadaverine	Unclassified	C5H14N2	102.116	HMDB02322	C01672	273	chebiId:18127	Cadaverine	273	pa
Capric acid@14.38-sf	Capric acid	FALSE	FALSE	14.378	1	Capric_acid	Fatty Acyls	C10H20O2	172.146	HMDB00511	C01571	2969	chebiId:30813	Capric acid	2969	sf
Caproic acid@11.79-sf	Caproic acid	FALSE	FALSE	11.788	1	Caproic_acid	Fatty Acyls	C6H12O2	116.084	HMDB00535	C01585	8892	chebiId:30776	Caproic acid	8892	sf
Caprylic acid@14.10-sf	Caprylic acid	FALSE	FALSE	14.099	1	Caprylic_acid	Fatty Acyls	C8H16O2	144.115	HMDB00482	C06423	379	chebiId:28837	Caprylic acid	379	sf
Carnitine C10:0@12.17-qppos	Carnitine C10:0	FALSE	FALSE	12.168	1	Carnitine_C10:0	Fatty Acyls	C17H33NO4	315.241	HMDB00651	-	10245190	-	Carnitine C10:0	10245190	qppos
Carnitine C10:1@11.39-qppos	Carnitine C10:1	FALSE	FALSE	11.389	1	Carnitine_C10:1	Fatty Acyls	C17H31NO4	313.225	HMDB13205	-	53481651	-	Carnitine C10:1	53481651	qppos
Carnitine C12:0@13.94-qppos	Carnitine C12:0	FALSE	FALSE	13.938	1	Carnitine_C12:0	Fatty Acyls	C19H37NO4	343.272	HMDB02250	-	168381	-	Carnitine C12:0	168381	qppos
Carnitine C12:1@10.54-qppos	Carnitine C12:1	FALSE	FALSE	10.541	1	Carnitine_C12:1	Fatty Acyls	C19H35NO4	341.257	HMDB13326	-	53481671	-	Carnitine C12:1	53481671	qppos
Carnitine C14:0@15.63-qppos	Carnitine C14:0	FALSE	FALSE	15.627	1	Carnitine_C14:0	Fatty Acyls	C21H41NO4	371.304	HMDB05066	-	53477791	-	Carnitine C14:0	53477791	qppos
Carnitine C14:0(OH)@13.74-qppos	Carnitine C14:0(OH)	FALSE	FALSE	13.739	1	Carnitine_C14:0(OH)	Fatty Acyls	C21H41NO5	387.298	HMDB13166;HMDB61640	-	53481642	-	Carnitine C14:0(OH)	53481642	qppos
Carnitine C14:1@14.77-qppos	Carnitine C14:1	FALSE	FALSE	14.768	1	Carnitine_C14:1	Fatty Acyls	C21H39NO4	369.288	HMDB13329;HMDB02014	-	22833575;53481677	-	Carnitine C14:1	22833575	qppos
Carnitine C14:1(OH)@13.12-qppos	Carnitine C14:1(OH)	FALSE	FALSE	13.119	1	Carnitine_C14:1(OH)	Organic acids	C21H39NO5	385.283	HMDB13330	-	53481679	-	Carnitine C14:1(OH)	53481679	qppos
Carnitine C14:2@13.90-qppos	Carnitine C14:2	FALSE	FALSE	13.903	1	Carnitine_C14:2	Fatty Acyls	C21H37NO4	367.272	HMDB13331	-	53481681	-	Carnitine C14:2	53481681	qppos
Carnitine C16:1@16.19-qppos	Carnitine C16:1	FALSE	FALSE	16.194	1	Carnitine_C16:1	Fatty Acyls	C23H43NO4	397.319	HMDB13207;HMDB06317	-	53477817;53481653	-	Carnitine C16:1	53477817	qppos
Carnitine C16:2@15.32-qppos	Carnitine C16:2	FALSE	FALSE	15.321	1	Carnitine_C16:2	Fatty Acyls	C23H41NO4	395.304	HMDB13334	-	53481687	-	Carnitine C16:2	53481687	qppos
Carnitine C18:0@19.07-qppos	Carnitine C18:0	FALSE	FALSE	19.074	1	Carnitine_C18:0	Fatty Acyls	C25H49NO4	427.366	HMDB00848	-	6426855	-	Carnitine C18:0	6426855	qppos
Carnitine C18:0(OH)@17.49-qppos	Carnitine C18:0(OH)	FALSE	FALSE	17.489	1	Carnitine_C18:0(OH)	Fatty Acyls	C25H49NO5	443.361	HMDB13154	-	53481632	-	Carnitine C18:0(OH)	53481632	qppos
Carnitine C18:1@17.75-qppos	Carnitine C18:1	FALSE	FALSE	17.754	1	Carnitine_C18:1	Fatty Acyls	C25H47NO4	425.351	HMDB05065	-	53477789	-	Carnitine C18:1	53477789	qppos
Carnitine C18:1(OH)@15.84-qppos	Carnitine C18:1(OH)	FALSE	FALSE	15.835	1	Carnitine_C18:1(OH)	Organic acids	C25H47NO5	441.345	HMDB13339;HMDB13340	-	53481697;53481699	-	Carnitine C18:1(OH)	53481697	qppos
Carnitine C18:2@16.79-qppos	Carnitine C18:2	FALSE	FALSE	16.786	1	Carnitine_C18:2	Fatty Acyls	C25H45NO4	423.335	HMDB06469;HMDB06461	-	6450015;53477834	-	Carnitine C18:2	53477834	qppos
Carnitine C3:0@1.50-qppos	Carnitine C3:0	FALSE	FALSE	1.5	1	Carnitine_C3:0	Fatty Acyls	C10H19NO4	217.131	HMDB00824	C03017	107738	chebiId:28867	Carnitine C3:0	107738	qppos
Carnitine C4:0@2.49-qppos	Carnitine C4:0	FALSE	FALSE	2.494	1	Carnitine_C4:0	Fatty Acyls	C11H21NO4	231.147	HMDB00736	-	10177002;439829	-	Carnitine C4:0	10177002	qppos
Carnitine C4:0(OH)@1.35-qppos	Carnitine C4:0(OH)	FALSE	FALSE	1.347	1	Carnitine_C4:0(OH)	Fatty Acyls	C11H21NO5	247.142	HMDB13127	-	53481617	-	Carnitine C4:0(OH)	53481617	qppos
Carnitine C5:0@5.09-qppos	Carnitine C5:0	FALSE	FALSE	5.092	1	Carnitine_C5:0	Fatty Acyls	C12H23NO4	245.163	HMDB00688	-	6426851	-	Carnitine C5:0	6426851	qppos
Carnitine C6:0@7.42-qppos	Carnitine C6:0	FALSE	FALSE	7.421	1	Carnitine_C6:0	Fatty Acyls	C13H25NO4	259.178	HMDB00705	-	6426853;3246938	-	Carnitine C6:0	6426853	qppos
Carnitine C8:0@10.12-qppos	Carnitine C8:0	FALSE	FALSE	10.119	1	Carnitine_C8:0	Fatty Acyls	C15H29NO4	287.21	HMDB00791	C02838	11953814	chebiId:18102	Carnitine C8:0	11953814	qppos
Carnitine C8:1@8.94-qppos	Carnitine C8:1	FALSE	FALSE	8.944	1	Carnitine_C8:1	Fatty Acyls	C15H27NO4	285.194	HMDB13324	-	53481667	-	Carnitine C8:1	53481667	qppos
Chenodeoxycholic acid@10.60-ba	Chenodeoxycholic acid	FALSE	FALSE	10.601	1	Chenodeoxycholic acid	Steroids	C24H40O4	392.293	HMDB00518	C02528	10133	chebiId:16755	Chenodeoxycholic acid	10133	ba
Cholesterol@29.51-gc	Cholesterol	FALSE	FALSE	29.51	1	Cholesterol	Steroids	C27H46O	386.355	HMDB00067	C00187	6432564;5997	chebiId:16113	Cholesterol	5997	gc
Cholic acid@9.46-ba	Cholic acid	FALSE	FALSE	9.464	1	Cholic acid	Steroids	C24H40O5	408.288	HMDB00619	C00695;C01558	221493;303;439520	chebiId:16359;chebiId:22868;chebiId:3098	Cholic acid	303	ba
Citric acid;Isocitric acid@15.79-gc	Citric acid;Isocitric acid	FALSE	FALSE	15.795	1	Citric_acid__Isocitric_acid	Organic acids	C6H8O7	192.027	HMDB00094;HMDB00193	C00158;C00311	311;19782904;88113319;1198	chebiId:30769;chebiId:30887	Citric acid;Isocitric acid	19782904;1198	gc
Citrulline@15.76-gc	Citrulline	FALSE	FALSE	15.759	1	Citrulline	Amino acids	C6H13N3O3	175.096	HMDB00904	C00327	833;9750;25244873	chebiId:16349	Citrulline	25244873	gc
Creatinine@0.99-qppos	Creatinine	FALSE	FALSE	0.992	1	Creatinine	Amino acids	C4H7N3O	113.059	HMDB00562	C00791	588	chebiId:16737	Creatinine	588	qppos
Cystine@1.01-qppos	Cystine	FALSE	FALSE	1.008	1	Cystine	Amino acids	C6H12N2O4S2	240.024	HMDB00192	C00491	67678	chebiId:16283	Cystine	67678	qppos
Deoxycholic acid@10.81-ba	Deoxycholic acid	FALSE	FALSE	10.812	1	Deoxycholic acid	Steroids	C24H40O4	392.293	HMDB00626	C11171;C04483	222528;2987;23668196	chebiId:9177;chebiId:28834	Deoxycholic acid	2987	ba
Desaminotyrosine@15.03-gc	Desaminotyrosine	FALSE	FALSE	15.028	1	Desaminotyrosine	Flavonoids	C9H10O3	166.063	HMDB02199	C01744	10394	chebiId:32980	Desaminotyrosine	10394	gc
Docosadienoic acid@22.81-qpneg	Docosadienoic acid	FALSE	FALSE	22.815	1	Docosadienoic_acid	Fatty Acyls	C22H40O2	336.303	-	C16533	5282807;5312554	chebiId:75117	Docosadienoic acid	5282807	qpneg
Docosahexaenoic acid@20.07-qpneg	Docosahexaenoic acid	FALSE	FALSE	20.065	1	Docosahexaenoic_acid	Fatty Acyls	C22H32O2	328.24	HMDB02183	C06429	445580	chebiId:28125	Docosahexaenoic acid	445580	qpneg
Docosapentaenoic acid@20.48-qpneg	Docosapentaenoic acid	FALSE	FALSE	20.481	1	Docosapentaenoic_acid	Fatty Acyls	C22H34O2	330.256	HMDB01976;HMDB06528	C16513	6441454;5497182;3035421	chebiId:53488	Docosapentaenoic acid	3035421	qpneg
Docosatrienoic acid@22.00-qpneg	Docosatrienoic acid	FALSE	FALSE	22	1	Docosatrienoic_acid	Fatty Acyls	C22H38O2	334.287	HMDB02823	C16534	5312556	chebiId:80549	Docosatrienoic acid	5312556	qpneg
Docosenoic acid@23.76-qpneg	Docosenoic acid	FALSE	FALSE	23.759	1	Docosenoic_acid	Fatty Acyls	C22H42O2	338.318	HMDB02068	C08316	5281116	chebiId:28792	Docosenoic acid	5281116	qpneg
Dodecanedioic acid@12.99-qpneg	Dodecanedioic acid	FALSE	FALSE	12.992	1	Dodecanedioic_acid	Fatty Acyls	C12H22O4	230.152	HMDB00623	C02678	12736	chebiId:4676	Dodecanedioic acid	12736	qpneg
Dodecenoic acid@13.08-qpneg	Dodecenoic acid	FALSE	FALSE	13.085	1	Dodecenoic_acid	Fatty Acyls	C12H22O2	198.162	HMDB00529;HMDB10729;HMDB32248	-	5312378;5282729;125207	-	Dodecenoic acid	125207	qpneg
Dopamine@19.61-gc	Dopamine	FALSE	FALSE	19.615	1	Dopamine	Unclassified	C8H11NO2	153.079	HMDB00073	C03758	681	chebiId:18243	Dopamine	681	gc
Eicosadienoic acid@21.50-qpneg	Eicosadienoic acid	FALSE	FALSE	21.496	1	Eicosadienoic_acid	Fatty Acyls	C20H36O2	308.272	HMDB05060	C16525	6439848	chebiId:73731	Eicosadienoic acid	6439848	qpneg
Eicosapentaenoic acid@19.39-qpneg	Eicosapentaenoic acid	FALSE	FALSE	19.39	1	Eicosapentaenoic_acid	Fatty Acyls	C20H30O2	302.225	HMDB01999	C06428	446284	chebiId:28364	Eicosapentaenoic acid	446284	qpneg
Eicosatrienoic acid@20.68-qpneg	Eicosatrienoic acid	FALSE	FALSE	20.679	1	Eicosatrienoic_acid	Fatty Acyls	C20H34O2	306.256	HMDB60039	C16522	5312529	chebiId:53460	Dihomo-linolenic acid	5312529	qpneg
Eicosenoic acid@22.44-qpneg	Eicosenoic acid	FALSE	FALSE	22.44	1	Eicosenoic_acid	Fatty Acyls	C20H38O2	310.287	HMDB02231	C16526	5282768	chebiId:32425	Eicosenoic acid	5282768	qpneg
Erythritol@12.28-gc	Erythritol	FALSE	FALSE	12.283	1	Erythritol	Carbohydrates	C4H10O4	122.058	HMDB02994	C00503	222285;8998	chebiId:17113;chebiId:48299	Erythritol	8998	gc
Ferulic acid@19.73-gc	Ferulic acid	FALSE	FALSE	19.725	1	Ferulic_acid	Flavonoids	C10H10O4	194.058	HMDB00537;HMDB00954	C01494	445858;709	chebiId:17620	Ferulic acid	445858	gc
Fumaric acid@10.06-gc	Fumaric acid	FALSE	FALSE	10.059	1	Fumaric_acid	Organic acids	C4H4O4	116.011	HMDB00134	C00122	444972	chebiId:18012	Fumaric acid	444972	gc
GABA@12.43-gc	GABA	FALSE	FALSE	12.43	1	GABA	Amino acids	C4H9NO2	103.063	HMDB00112	C00334	119;6992099	chebiId:16865	GABA	119	gc
Galactose;Glucose;Mannose@16.79-gc	Galactose;Glucose;Mannose	FALSE	FALSE	16.792	1	Galactose__Glucose__Mannose	Carbohydrates	C6H12O6	180.063	HMDB00143;HMDB33704;HMDB00122;HMDB03345;HMDB00516;HMDB00169	C00124;C01582;C00984;C01825;C00031;C00267;C00221;C00159	439357;6036;3037556;12003287;79025;5793;206;64689;161658;18950	chebiId:4139;chebiId:28061;chebiId:28260;chebiId:42905;chebiId:4167;chebiId:17925;chebiId:15903;chebiId:4208	Galactose;Glucose;Mannose	12003287;206;161658	gc
Gamma-glutamyltryptophan@6.42-qppos	Gamma-glutamyltryptophan	FALSE	FALSE	6.423	1	Gamma-glutamyltryptophan	-	-	-	-	-	-	-	-	-	qppos
Gamma-glutamyltyrosine@2.63-qppos	Gamma-glutamyltyrosine	FALSE	FALSE	2.626	1	Gamma-glutamyltyrosine	Peptides	C14H18N2O6	310.116	HMDB11741	-	94340	-	Gamma-glutamyltyrosine	94340	qppos
Glucose-6-phosphate;Fructose-6-phosphate@23.71-gc	Glucose-6-phosphate;Fructose-6-phosphate	FALSE	FALSE	23.711	1	Glucose-6-phosphate__Fructose-6-phosphate	Carbohydrates	C6H13O9P	260.03	HMDB00124;HMDB03971;HMDB01401;HMDB03498	C05345;C00085;C00668;C00092;C01172	69507;440641;439160;5958;208;439284;439427	chebiId:16084;chebiId:15946;chebiId:61553;chebiId:17665;chebiId:4170;chebiId:17719	Fructose-6-phosphate;Glucose-6-phosphate	439160;208	gc
Glutamic acid@13.52-gc	Glutamic acid	FALSE	FALSE	13.516	1	Glutamic_acid	Amino acids	C5H9NO4	147.053	HMDB03339;HMDB00148	C00025;C00302;C00217	611;33032;57397101;23327	chebiId:16015;chebiId:15966;chebiId:18327	Glutamic acid	57397101	gc
Glutamine@15.22-gc	Glutamine	FALSE	FALSE	15.22	1	Glutamine	Amino acids	C5H10N2O3	146.069	HMDB00641;HMDB03423	C00064;C00819	5961;145815;25244553;738	chebiId:18050;chebiId:17061	Glutamine	25244553	gc
Glyceric acid@9.95-gc	Glyceric acid	FALSE	FALSE	9.949	1	Glyceric_acid	Carbohydrates	C3H6O4	106.027	HMDB00139	C00258	752;439194	chebiId:32398	Glyceric acid	752	gc
Glycerol@9.19-gc	Glycerol	FALSE	FALSE	9.187	1	Glycerol	Carbohydrates	C3H8O3	92.047	HMDB00131	C00116	753	chebiId:17754	Glycerol	753	gc
Glycerol-3-phosphate@15.20-gc	Glycerol-3-phosphate	FALSE	FALSE	15.204	1	Glycerol-3-phosphate	Lipids	C3H9O6P	172.014	HMDB00126	C00093	754;439162	chebiId:15978	Glycerol-3-phosphate	754	gc
Glycerophosphorylcholine@1.01-qppos	Glycerophosphorylcholine	FALSE	FALSE	1.012	1	Glycerophosphorylcholine	Lipids	C8H20NO6P	257.103	HMDB00086	C00670	657272;439285;11234	chebiId:16870	Glycerophosphorylcholine	11234	qppos
Glycine@9.60-gc	Glycine	FALSE	FALSE	9.602	1	Glycine	Amino acids	C2H5NO2	75.032	HMDB00123	C00037	750;5257127	chebiId:15428	Glycine	5257127	gc
Glycochenodeoxycholic acid@9.55-ba	Glycochenodeoxycholic acid	FALSE	FALSE	9.546	1	Glycochenodeoxycholic acid	Steroids	C26H43NO5	449.314	HMDB00637;HMDB06898	C05466;C05462	22833540;12544	chebiId:36274	Glycochenodeoxycholic acid	12544	ba
Glycocholic acid@6.81-ba	Glycocholic acid	FALSE	FALSE	6.807	1	Glycocholic acid	Steroids	C26H43NO6	465.309	HMDB00138	C01921	10140;23617285;755	chebiId:17687	Glycocholic acid	755	ba
Glycodeoxycholic acid@9.80-ba	Glycodeoxycholic acid	FALSE	FALSE	9.796	1	Glycodeoxycholic acid	Steroids	C26H43NO5	449.314	HMDB00631	C05464	3035026;22833539	chebiId:27471	Glycodeoxycholic acid	22833539	ba
Glycolic acid@1.25-sf	Glycolic acid	FALSE	FALSE	1.247	1	Glycolic_acid	Organic acids	C2H4O3	76.016	HMDB00115	C00160	757;3698251	chebiId:17497	Glycolic acid	3698251	sf
Glycoursodeoxycholic acid@5.98-ba	Glycoursodeoxycholic acid	FALSE	FALSE	5.98	1	Glycoursodeoxycholic acid	Steroids	C26H43NO5	449.314	HMDB00708	-	12310288	-	Glycoursodeoxycholic acid	12310288	ba
Glyoxylic acid@12.51-sf	Glyoxylic acid	FALSE	FALSE	12.506	1	Glyoxylic_acid	Organic acids	C2H2O3	74	HMDB00119	C00048	760	chebiId:16891	Glyoxylic acid	760	sf
Guanine@19.72-gc	Guanine	FALSE	FALSE	19.717	1	Guanine	Bases	C5H5N5O	151.049	HMDB00132	C00242	764	chebiId:16235	Guanine	764	gc
Guanosine@2.46-qppos	Guanosine	FALSE	FALSE	2.464	1	Guanosine	Nucleosides	C10H13N5O5	283.092	HMDB00133	C00387	6802;765	chebiId:16750	Guanosine	765	qppos
Heptadecatrienoic acid@18.70-qpneg	Heptadecatrienoic acid	FALSE	FALSE	18.7	1	Heptadecatrienoic_acid	Fatty Acyls	C17H28O2	264.209	-	C16344	16061034	chebiId:76235	Heptadecatrienoic acid	16061034	qpneg
Heptadecenoic acid@20.36-qpneg	Heptadecenoic acid	FALSE	FALSE	20.356	1	Heptadecenoic_acid	Fatty Acyls	C17H32O2	268.24	HMDB31046;HMDB60038	C16536	5312435;5312440	chebiId:80550	Heptadecenoic acid	5312435	qpneg
Heptanoic acid@11.80-qpneg	Heptanoic acid	FALSE	FALSE	11.797	1	Heptanoic_acid	Fatty Acyls	C7H14O2	130.099	HMDB00666	C17714	8094	chebiId:45571	Heptanoic acid	8094	qpneg
Hexacosanoic acid@27.15-qpneg	Hexacosanoic acid	FALSE	FALSE	27.148	1	Hexacosanoic_acid	Fatty Acyls	C26H52O2	396.397	HMDB02356	-	10469	-	Hexacosanoic acid	10469	qpneg
Hexadecadienoic acid@18.77-qpneg	Hexadecadienoic acid	FALSE	FALSE	18.774	1	Hexadecadienoic_acid	Fatty Acyls	C16H28O2	252.209	HMDB00477	-	13932172	-	Hexadecadienoic acid	13932172	qpneg
Hexadecanedioic acid@16.42-qpneg	Hexadecanedioic acid	FALSE	FALSE	16.422	1	Hexadecanedioic_acid	Fatty Acyls	C16H30O4	286.214	HMDB00672	C19615	10459	chebiId:73722	Hexadecanedioic acid	10459	qpneg
Hippuric acid@15.90-gc	Hippuric acid	FALSE	FALSE	15.904	1	Hippuric_acid	Unclassified	C9H9NO3	179.058	HMDB00714	C01586	464	chebiId:18089	Hippuric acid	464	gc
Histidine@16.84-gc	Histidine	FALSE	FALSE	16.844	1	Histidine	Amino acids	C6H9N3O2	155.069	HMDB00177	C00135	6274;773;3651426	-	Histidine	3651426	gc
Homoserine@0.99-qppos	Homoserine	FALSE	FALSE	0.994	1	Homoserine	Amino acids	C4H9NO3	119.058	HMDB00719	C00263	12647;1502076;779;25245858;193314	chebiId:15699	Homoserine	193314	qppos
Homovanillic acid@4.12-qpneg	Homovanillic acid	FALSE	FALSE	4.121	1	Homovanillic_acid	Unclassified	C9H10O4	182.058	HMDB00118	C05582	1738	chebiId:545959	Homovanillic acid	1738	qpneg
Hyocholic acid@9.24-ba	Hyocholic acid	FALSE	FALSE	9.243	1	Hyocholic acid	Steroids	C24H40O5	408.288	HMDB00760	C17649	92805	chebiId:81244	Hyocholate;Hyocholic acid;Iocholic acid;gamma-Muricholate;alpha-Hyocholic acid;3alpha,6alpha,7alpha-Trihydroxy-5beta-cholan-24-oic acid;6alpha-Hydroxychenodeoxycholic acid	92805	ba
Hyodeoxycholic acid@9.69-ba	Hyodeoxycholic acid	FALSE	FALSE	9.694	1	Hyodeoxycholic acid	Steroids	C24H40O4	392.293	HMDB00733	-	9963687;227033	-	Hyodeoxycholic acid	227033	ba
Hypotaurine@13.28-gc	Hypotaurine	FALSE	FALSE	13.282	1	Hypotaurine	Organic acids	C2H7NO2S	109.02	HMDB00965	C00519	107812;25244088	chebiId:16668	Hypotaurine	107812	gc
Hypoxanthine@15.55-gc	Hypoxanthine	FALSE	FALSE	15.554	1	Hypoxanthine	Bases	C5H4N4O	136.039	HMDB00157	C00262	790	chebiId:17368	Hypoxanthine	790	gc
Indole-3-butyric acid@11.74-qpneg	Indole-3-butyric acid	FALSE	FALSE	11.736	1	Indole-3-butyric_acid	Indoles	C12H13NO2	203.095	HMDB02096	C11284	8617	chebiId:33070	Indole-3-butyric acid	8617	qpneg
Indole-3-propionic acid@10.72-qpneg	Indole-3-propionic acid	FALSE	FALSE	10.722	1	Indole-3-propionic_acid	Indoles	C11H11NO2	189.079	HMDB02302	-	3744	-	Indole-3-propionic acid	3744	qpneg
Inosine@26.13-gc	Inosine	FALSE	FALSE	26.133	1	Inosine	Nucleosides	C10H12N4O5	268.081	HMDB00195	C00294	6021	chebiId:17596	Inosine	6021	gc
Inositol@19.62-gc	Inositol	FALSE	FALSE	19.616	1	Inositol	Unclassified	C6H12O6	180.063	HMDB06088;HMDB00211	C06153;C00137;C19891	892	chebiId:10642;chebiId:17268	Inositol	892	gc
Isobutyric acid@4.95-sf	Isobutyric acid	FALSE	FALSE	4.949	1	Isobutyric_acid	Organic acids	C4H8O2	88.052	HMDB01873	C02632	6590	chebiId:16135	Isobutyric acid	6590	sf
Isocaproic acid@11.53-sf	Isocaproic acid	FALSE	FALSE	11.526	1	Isocaproic_acid	Fatty Acyls	C6H12O2	116.084	HMDB00689	-	12587	-	Isocaproic acid	12587	sf
Isoleucine@9.43-gc	Isoleucine	FALSE	FALSE	9.429	1	Isoleucine	Amino acids	C6H13NO2	131.095	HMDB00172	C00407	791;6306	chebiId:17191	Isoleucine	791	gc
Isovaleric acid@8.91-sf	Isovaleric acid	FALSE	FALSE	8.912	1	Isovaleric_acid	Fatty Acyls	C5H10O2	102.068	HMDB00718	C08262	10430	chebiId:28484	Isovaleric acid	10430	sf
Ketoisocaproic acid@8.35-gc	Ketoisocaproic acid	FALSE	FALSE	8.351	1	Ketoisocaproic_acid	Organic acids	C6H10O3	130.063	HMDB00695	C00233	70	chebiId:48430	Ketoisocaproic acid	70	gc
Kynurenine@21.14-gc	Kynurenine	FALSE	FALSE	21.144	1	Kynurenine	Unclassified	C10H12N2O3	208.085	HMDB00684	C00328	846;161166;25245862	chebiId:16946	Kynurenine	25245862	gc
Lactic acid@6.37-gc	Lactic acid	FALSE	FALSE	6.366	1	Lactic_acid	Organic acids	C3H6O3	90.032	HMDB01311;HMDB00190	C00256;C00186	61503;107689;19789253;612	chebiId:341;chebiId:42111;chebiId:422	Lactic acid	19789253	gc
Lauric acid@17.52-qpneg	Lauric acid	FALSE	FALSE	17.523	1	Lauric_acid	Fatty Acyls	C12H24O2	200.178	HMDB00638	C02679	3893	chebiId:30805	Lauric acid	3893	qpneg
Leucine@9.13-gc	Leucine	FALSE	FALSE	9.134	1	Leucine	Amino acids	C6H13NO2	131.095	HMDB00687	C00123	6106;857;5255803	chebiId:15603	Leucine	5255803	gc
Leucylproline@1.34-qppos	Leucylproline	FALSE	FALSE	1.342	1	Leucylproline	Peptides	C11H20N2O3	228.147	HMDB11175	-	44369311	-	Leucylproline	44369311	qppos
Linoleic acid@20.14-qpneg	Linoleic acid	FALSE	FALSE	20.141	1	Linoleic_acid	Fatty Acyls	C18H32O2	280.24	HMDB00673	C01595	5280450;3931	chebiId:17351	Linoleic acid	3931	qpneg
Lysine@16.84-gc	Lysine	FALSE	FALSE	16.838	1	Lysine	Amino acids	C6H14N2O2	146.106	HMDB03405;HMDB00182	C00739;C00047	57449;5962;866;5248709	chebiId:16855;chebiId:18019	Lysine	5248709	gc
Maleic acid@10.06-gc	Maleic acid	FALSE	FALSE	10.059	1	Maleic_acid	Organic acids	C4H4O4	116.011	HMDB00176	C01384	444266	chebiId:18300	Maleic acid	444266	gc
Malic acid@11.97-gc	Malic acid	FALSE	FALSE	11.972	1	Malic_acid	Organic acids	C4H6O5	134.022	HMDB00156;HMDB00744	C00149;C00711	525;20130941;222656	chebiId:30797;chebiId:6650	Malic acid	20130941	gc
Malonic acid@7.40-gc	Malonic acid	FALSE	FALSE	7.396	1	Malonic_acid	Organic acids	C3H4O4	104.011	HMDB00691	C00383	867;23511544	chebiId:30794	Malonic acid	23511544	gc
Mannitol@0.96-qpneg	Mannitol	FALSE	FALSE	0.963	1	Mannitol	Carbohydrates	C6H14O6	182.079	HMDB00765	C00392	6251	chebiId:16899	Mannitol	6251	qpneg
Margaric acid@21.47-qpneg	Margaric acid	FALSE	FALSE	21.471	1	Margaric_acid	Fatty Acyls	C17H34O2	270.256	HMDB02259	-	10465	-	Margaric acid	10465	qpneg
Methylmalonic acid@8.38-gc	Methylmalonic acid	FALSE	FALSE	8.385	1	Methylmalonic_acid	Organic acids	C4H6O4	118.027	HMDB00202	C02170	487	chebiId:30860	Methylmalonic acid	487	gc
Methylsuccinic acid@9.36-sf	Methylsuccinic acid	FALSE	FALSE	9.361	1	Methylsuccinic_acid	Fatty Acyls	C5H8O4	132.042	HMDB01844	-	10349	-	Methylsuccinic acid	10349	sf
Myristic acid@19.18-qpneg	Myristic acid	FALSE	FALSE	19.185	1	Myristic_acid	Fatty Acyls	C14H28O2	228.209	HMDB00806	C06424	11005	chebiId:28875;chebiId:30807	Myristic acid	11005	qpneg
Myristoleic acid@18.11-qpneg	Myristoleic acid	FALSE	FALSE	18.113	1	Myristoleic_acid	Fatty Acyls	C14H26O2	226.193	HMDB02000	C08322	5281119	chebiId:27781	Myristoleic acid	5281119	qpneg
N-acetylaspartic acid@1.36-qpneg	N-acetylaspartic acid	FALSE	FALSE	1.363	1	N-acetylaspartic_acid	Amino acids	C6H9NO5	175.048	HMDB00812	C01042	65065;97508	chebiId:16953;chebiId:21547	N-acetylaspartic acid	97508	qpneg
N-acetylglutamic acid@1.56-qpneg	N-acetylglutamic acid	FALSE	FALSE	1.564	1	N-acetylglutamic_acid	Amino acids	C7H11NO5	189.064	HMDB01138	C00624	70914	chebiId:17533;chebiId:44337	N-acetylglutamic acid	70914	qpneg
N-acetylglutamine@1.38-qpneg	N-acetylglutamine	FALSE	FALSE	1.377	1	N-acetylglutamine	Amino acids	C7H12N2O4	188.08	HMDB06029	-	182230	chebiId:17008	N-acetylglutamine	182230	qpneg
N-acetylputrescine@3.37-pa	N-acetylputrescine	FALSE	FALSE	3.37	1	N-acetylputrescine	Organic acids	C6H14N2O	130.111	HMDB02064	C02714	122356	chebiId:17768	N-acetylputrescine	122356	pa
N1-acetylspermidine@5.09-pa	N1-acetylspermidine	FALSE	FALSE	5.089	1	N1-acetylspermidine	Amino acids	C9H21N3O	187.168	HMDB01276	C00612	496	chebiId:17927	N-acetylspermine	496	pa
N1-acetylspermine@6.46-pa	N1-acetylspermine	FALSE	FALSE	6.456	1	N-acetylspermine	Amino acids	C12H28N4O	244.226	HMDB01186	C02567	916	chebiId:17312	N-acetylspermine	916	pa
N1,N12-diacetylspermine@5.42-pa	N1,N12-diacetylspermine	FALSE	FALSE	5.418	1	N1-N12-diacetylspermine	Amino acids	C14H30N4O2	286.237	HMDB02172;HMDB41876	C03413	132679;132680	chebiId:28101	N1,N12-diacetylspermine	132680	pa
N1,N8-diacetylspermidine@4.02-pa	N1,N8-diacetylspermidine	FALSE	FALSE	4.019	1	N1-N8-diacetylspermidine	Amino acids	C11H23N3O2	229.179	HMDB41947	-	389613	-	N1,N8-diacetylspermidine	389613	pa
N8-acetylspermidine@5.25-pa	N8-acetylspermidine	FALSE	FALSE	5.249	1	N8-acetylspermidine	Amino acids	C9H21N3O	187.168	HMDB02189	C01029	123689	chebiId:27911	N-acetylspermidine	123689	pa
Nonadecenoic acid@21.78-qpneg	Nonadecenoic acid	FALSE	FALSE	21.778	1	Nonadecenoic_acid	Fatty Acyls	C19H36O2	296.272	HMDB13622	-	5312513	chebiId:37527	Nonadecenoic acid	5312513	qpneg
Nonanoic acid@14.55-qpneg	Nonanoic acid	FALSE	FALSE	14.55	1	Nonanoic_acid	Fatty Acyls	C9H18O2	158.131	HMDB00847	C01601	8158	chebiId:29019	Nonanoic acid	8158	qpneg
O-phosphoethanolamine@15.39-gc	O-phosphoethanolamine	FALSE	FALSE	15.393	1	O-phosphoethanolamine	Organic acids	C2H8NO4P	141.019	HMDB00224	C00346	1015;5232324	chebiId:17553	O-phosphoethanolamine	1015	gc
Oleic acid;Elaidic acid;Vaccenic acid@21.07-qpneg	Oleic acid;Elaidic acid;Vaccenic acid	FALSE	FALSE	21.069	1	Oleic_acid__Elaidic_acid__Vaccenic_acid	Fatty Acyls	C18H34O2	282.256	HMDB00573;HMDB00207;HMDB03231	C01712;C00712;C08367	637517;445639;5282761;5281127	chebiId:27997;chebiId:16196;chebiId:28727	Oleic acid;Elaidic acid;Vaccenic acid	637517;445639;5281127	qpneg
Ornithine@2.51-pa	Ornithine	FALSE	FALSE	2.508	1	Ornithine	Amino acids	C5H12N2O2	132.09	HMDB03374;HMDB00214	C00077;C00515	6262;389;71082	chebiId:15729;chebiId:16176	Ornithine	389	pa
Orotic acid@1.46-sf	Orotic acid	FALSE	FALSE	1.462	1	Orotic_acid	Bases	C5H4N2O4	156.017	HMDB00226	C00295	967	chebiId:16742	Orotic acid	967	sf
Oxaloacetic acid@13.99-sf	Oxaloacetic acid	FALSE	FALSE	13.986	1	Oxaloacetic_acid	Organic acids	C4H4O5	132.006	HMDB00223	C00036	970	chebiId:30744	Oxaloacetic acid	970	sf
Palmitic acid@20.73-qpneg	Palmitic acid	FALSE	FALSE	20.73	1	Palmitic_acid	Fatty Acyls	C16H32O2	256.24	HMDB00220	C00249	985	chebiId:15756	Palmitic acid	985	qpneg
Palmitoleic acid@19.62-qpneg	Palmitoleic acid	FALSE	FALSE	19.625	1	Palmitoleic_acid	Fatty Acyls	C16H30O2	254.225	HMDB03229	C08362	445638;4668	chebiId:28716	Palmitoleic acid	445638	qpneg
Pantothenic acid@17.80-gc	Pantothenic acid	FALSE	FALSE	17.8	1	Pantothenic_acid	Amino acids	C9H17NO5	219.111	HMDB00210	C00864	6613;988	chebiId:29032;chebiId:46905;chebiId:7916	Pantothenic acid	988	gc
PCae(12:0)@15.47-qppos	PCae(12:0)	FALSE	FALSE	15.465	1	PCae(12:0)	-	-	-	-	-	-	-	-	-	qppos
PCae(14:0)@15.25-qppos	PCae(14:0)	FALSE	FALSE	15.251	1	PCae(14:0)	Lipids	C22H46NO7P	467.301	HMDB10379	-	460604;24779490	-	PCae(14:0)	24779490	qppos
PCae(15:0)@15.98-qppos	PCae(15:0)	FALSE	FALSE	15.982	1	PCae(15:0)	Lipids	C23H48NO7P	481.317	HMDB10381	-	24779458	-	PCae(15:0)	24779458	qppos
PCae(16:0)@16.74-qppos	PCae(16:0)	FALSE	FALSE	16.738	1	PCae(16:0)	Lipids	C24H50NO7P	495.332	HMDB10382	-	460602;9827122;15061532;10097314;86554	-	PCae(16:0)	86554	qppos
PCae(16:1)@15.76-qppos	PCae(16:1)	FALSE	FALSE	15.76	1	PCae(16:1)	Lipids	C24H48NO7P	493.317	HMDB10383	-	24779461;24779462;24779460	-	PCae(16:1)	24779462	qppos
PCae(17:0)@17.49-qppos	PCae(17:0)	FALSE	FALSE	17.492	1	PCae(17:0)	Lipids	C25H52NO7P	509.348	HMDB12108	-	24779463;24779464	-	PCae(17:0)	24779464	qppos
PCae(18:0)@18.30-qppos	PCae(18:0)	FALSE	FALSE	18.302	1	PCae(18:0)	Lipids	C26H54NO7P	523.364	HMDB11128;HMDB10384	-	497299;24779491;18684067;86556;10436817;10208382	-	PCae(18:0)	10208382	qppos
PCae(18:1)@17.18-qppos	PCae(18:1)	FALSE	FALSE	17.179	1	PCae(18:1)	Lipids	C26H52NO7P	521.348	HMDB10385;HMDB02815	-	16081932;53480465;24779493;6449974;24779492;10279683;24779465;24779466;6030826;15120177;24779494	-	PCae(18:1)	10279683	qppos
PCae(18:2)@16.32-qppos	PCae(18:2)	FALSE	FALSE	16.315	1	PCae(18:2)	Lipids	C26H50NO7P	519.332	HMDB10386	-	11005824;24779467;11988421	-	PCae(18:2)	11988421	qppos
PCae(20:0)@20.36-qppos	PCae(20:0)	FALSE	FALSE	20.363	1	PCae(20:0)	Lipids	C28H58NO7P	551.395	HMDB10390	-	24779473	-	PCae(20:0)	24779473	qppos
PCae(20:1)@18.70-qppos	PCae(20:1)	FALSE	FALSE	18.698	1	PCae(20:1)	Lipids	C28H56NO7P	549.379	HMDB10391	-	52924051	-	PCae(20:1)	52924051	qppos
PCae(20:2)@18.15-qppos	PCae(20:2)	FALSE	FALSE	18.152	1	PCae(20:2)	Lipids	C28H54NO7P	547.364	HMDB10392	-	52924053	-	PCae(20:2)	52924053	qppos
PCae(20:3)@17.07-qppos	PCae(20:3)	FALSE	FALSE	17.073	1	PCae(20:3)	Lipids	C28H52NO7P	545.348	HMDB10394;HMDB10393	-	53480467;52924055	-	PCae(20:3)	52924055	qppos
PCae(20:4)@16.21-qppos	PCae(20:4)	FALSE	FALSE	16.212	1	PCae(20:4)	Lipids	C28H50NO7P	543.332	HMDB10395;HMDB10396	-	24779476;53480469;16035471	-	PCae(20:4)	16035471	qppos
PCae(20:5)@15.75-qppos	PCae(20:5)	FALSE	FALSE	15.746	1	PCae(20:5)	Lipids	C28H48NO7P	541.317	HMDB10397	-	11757087	-	PCae(20:5)	11757087	qppos
PCae(22:2)@19.54-qppos	PCae(22:2)	FALSE	FALSE	19.539	1	PCae(22:2)	Lipids	C30H58NO7P	575.395	HMDB10400	-	52924059	-	PCae(22:2)	52924059	qppos
PCae(22:3)@18.40-qppos	PCae(22:3)	FALSE	FALSE	18.399	1	PCae(22:3)	-	-	-	-	-	-	-	-	-	qppos
PCae(22:4)@17.57-qppos	PCae(22:4)	FALSE	FALSE	17.571	1	PCae(22:4)	Lipids	C30H54NO7P	571.364	HMDB10401	-	52924039	-	PCae(22:4)	52924039	qppos
PCae(22:5)@16.98-qppos	PCae(22:5)	FALSE	FALSE	16.984	1	PCae(22:5)	Lipids	C30H52NO7P	569.348	HMDB10402;HMDB10403	-	53480473;53480475	-	PCae(22:5)	53480473	qppos
PCae(22:6)@16.34-qppos	PCae(22:6)	FALSE	FALSE	16.336	1	PCae(22:6)	Lipids	C30H50NO7P	567.332	HMDB10404	-	10415542	-	PCae(22:6)	10415542	qppos
PCee(16:0)@18.26-qppos	PCee(16:0)	FALSE	FALSE	18.263	1	PCee(16:0)	Lipids	C24H52NO6P	481.353	-	-	-	-	PCee(16:0)	-	qppos
Pentadecanoic acid@19.96-qpneg	Pentadecanoic acid	FALSE	FALSE	19.965	1	Pentadecanoic_acid	Fatty Acyls	C15H30O2	242.225	HMDB00826	C16537	13849	chebiId:42504	Pentadecanoic acid	13849	qpneg
Pentadecenoic acid@18.93-qpneg	Pentadecenoic acid	FALSE	FALSE	18.935	1	Pentadecenoic_acid	Fatty Acyls	C15H28O2	240.209	HMDB29765	-	6365140	-	Pentadecenoic acid	6365140	qpneg
Phenylalanine@13.59-gc	Phenylalanine	FALSE	FALSE	13.592	1	Phenylalanine	Amino acids	C9H11NO2	165.079	HMDB00159	C00079	6140;994;57397115	chebiId:17295	Phenylalanine	57397115	gc
Phosphoric acid@9.22-gc	Phosphoric acid	FALSE	FALSE	9.222	1	Phosphoric_acid	Unclassified	H3O4P	97.977	HMDB01429;HMDB02142	C00009	1004	chebiId:18367;chebiId:26078	Phosphoric acid	1004	gc
Proline@1.03-qppos	Proline	FALSE	FALSE	1.025	1	Proline	Amino acids	C5H9NO2	115.063	HMDB03411;HMDB00162	C00763;C00148	8988;145742;25246272;614	chebiId:16313;chebiId:17203	Proline	25246272	qppos
Proline betaine@1.17-qppos	Proline betaine	FALSE	FALSE	1.174	1	Proline_betaine	Amino acids	C7H13NO2	143.095	HMDB04827	C10172	115244	chebiId:35280	Proline betaine	115244	qppos
Propionic acid@2.88-sf	Propionic acid	FALSE	FALSE	2.876	1	Propionic_acid	Organic acids	C3H6O2	74.037	HMDB00237	C00163	1032	chebiId:30768	Propionic acid	1032	sf
Putrescine@4.63-pa	Putrescine	FALSE	FALSE	4.627	1	Putrescine	Unclassified	C4H12N2	88.1	HMDB01414	C00134	1045	chebiId:17148	Putrescine	1045	pa
Pyruvic acid@13.75-sf	Pyruvic acid	FALSE	FALSE	13.752	1	Pyruvic_acid	Organic acids	C3H4O3	88.016	HMDB00243	C00022	1060	chebiId:32816	Pyruvic acid	1060	sf
Quinic acid@1.12-sf	Quinic acid	FALSE	FALSE	1.117	1	Quinic_acid	Unclassified	C7H12O6	192.063	HMDB03072	C00296	6508;1064	chebiId:17521;chebiId:29751	Quinic acid	1064	sf
Quinolinic acid@10.39-sf	Quinolinic acid	FALSE	FALSE	10.386	1	Quinolinic_acid	Unclassified	C7H5NO4	167.022	HMDB00232	C03722	1066	chebiId:16675	Quinolinic acid	1066	sf
Ribitol@14.86-gc	Ribitol	FALSE	FALSE	14.856	1	Ribitol	Carbohydrates	C5H12O5	152.068	HMDB00508	C00474	827	chebiId:15963	Ribitol	827	gc
Ribose;Ribulose@14.33-gc	Ribose;Ribulose	FALSE	FALSE	14.327	1	Ribose__Ribulose	Carbohydrates	C5H10O5	150.053	HMDB00283;HMDB00621;HMDB03371	C00121;C00309;C00508	5779;993;79021;439204;439203	chebiId:47013;chebiId:17173;chebiId:16880	Ribose;Ribulose	993;79021	gc
S-adenosylhomocysteine@3.12-qpneg	S-adenosylhomocysteine	FALSE	FALSE	3.123	1	S-adenosylhomocysteine	Nucleosides	C14H20N6O5S	384.122	HMDB00939	C00021	439155;25246222;193;5248805	chebiId:16680	S-adenosylhomocysteine	193	qpneg
S-adenosylmethionine@4.01-pa	S-adenosylmethionine	FALSE	FALSE	4.015	1	S-adenosylmethionine	Nucleosides	C15H22N6O5S	398.137	HMDB01185	C00019	34756;34755;5136	chebiId:15414;chebiId:67040	S-adenosylmethionine	5136	pa
Sebacic acid@16.81-gc	Sebacic acid	FALSE	FALSE	16.808	1	Sebacic_acid	Fatty Acyls	C10H18O4	202.121	HMDB00792	C08277	5192	chebiId:41865	Sebacic acid	5192	gc
Serine@10.33-gc	Serine	FALSE	FALSE	10.332	1	Serine	Amino acids	C3H7NO3	105.043	HMDB00187;HMDB03406	C00065;C00740	5951;617;6857552;71077	chebiId:17115	Serine	617	gc
Shikimic acid@15.21-gc	Shikimic acid	FALSE	FALSE	15.214	1	Shikimic_acid	Unclassified	C7H10O5	174.053	HMDB03070	C00493	8742;1094	chebiId:16119	Shikimic acid	1094	gc
Spermidine@6.52-pa	Spermidine	FALSE	FALSE	6.521	1	Spermidine	Unclassified	C7H19N3	145.158	HMDB01257	C00315	1102	chebiId:16610	Spermidine	1102	pa
Spermine@7.04-pa	Spermine	FALSE	FALSE	7.042	1	Spermine	Unclassified	C10H26N4	202.216	HMDB01256	C00750	1103	chebiId:15746	Spermine	1103	pa
Sphingosine-1-phosphate@14.82-qpneg	Sphingosine-1-phosphate	FALSE	FALSE	14.822	1	Sphingosine-1-phosphate	Lipids	C18H38NO5P	379.249	HMDB00277	C06124	5283560;5353956	chebiId:37550	Sphingosine-1-phosphate	5353956	qpneg
Stearic acid@22.22-qpneg	Stearic acid	FALSE	FALSE	22.215	1	Stearic_acid	Fatty Acyls	C18H36O2	284.272	HMDB00827	C01530	5281	chebiId:25629;chebiId:28842	Stearic acid	5281	qpneg
Stearidonic acid@18.71-qpneg	Stearidonic acid	FALSE	FALSE	18.705	1	Stearidonic_acid	Fatty Acyls	C18H28O2	276.209	HMDB06547	C16300	5312508	chebiId:32389	Stearidonic acid	5312508	qpneg
Succinic acid@9.64-gc	Succinic acid	FALSE	FALSE	9.643	1	Succinic_acid	Organic acids	C4H6O4	118.027	HMDB00254	C00042	1110;21952380	chebiId:15741	Succinic acid	1110	gc
Taurine@0.98-qpneg	Taurine	FALSE	FALSE	0.981	1	Taurine	Organic acids	C2H7NO3S	125.015	HMDB00251	C00245	1123;4068592	chebiId:15891	Taurine	1123	qpneg
Taurochenodeoxycholic acid@8.23-ba	Taurochenodeoxycholic acid	FALSE	FALSE	8.235	1	Taurochenodeoxycholic acid	Steroids	C26H45NO6S	499.297	HMDB00951	C05465	387316	chebiId:16525;chebiId:9407	Taurochenodeoxycholic acid	387316	ba
Taurocholic acid@5.03-ba	Taurocholic acid	FALSE	FALSE	5.031	1	Taurocholic acid	Steroids	C26H45NO7S	515.292	HMDB00036	C05122	440567;5247;46783527	chebiId:28865	Taurocholic acid	5247	ba
Taurodeoxycholic acid@9.16-ba	Taurodeoxycholic acid	FALSE	FALSE	9.157	1	Taurodeoxycholic acid	Steroids	C26H45NO6S	499.297	HMDB00896	C05463	2733768;440687;92042745	chebiId:36261;chebiId:9410	Taurodeoxycholic acid	2733768	ba
Tauroursodeoxycholic acid@4.54-ba	Tauroursodeoxycholic acid	FALSE	FALSE	4.542	1	Tauroursodeoxycholic acid	Steroids	C26H45NO6S	499.297	HMDB00874	-	12443252	-	Tauroursodeoxycholic acid	12443252	ba
Tetradecadienoic acid@13.90-qpneg	Tetradecadienoic acid	FALSE	FALSE	13.902	1	Tetradecadienoic_acid	Fatty Acyls	C14H24O2	224.178	HMDB00560	-	5312409	-	Tetradecadienoic acid	5312409	qpneg
Threonic acid@12.73-gc	Threonic acid	FALSE	FALSE	12.729	1	Threonic_acid	Carbohydrates	C4H8O5	136.037	HMDB00943	C01620	151152;439535;5460407	chebiId:15908;chebiId:49060	Threonic acid	439535	gc
Threonine@10.69-gc	Threonine	FALSE	FALSE	10.694	1	Threonine	Amino acids	C4H9NO3	119.058	HMDB00167	C00188	6288;205;15341575	chebiId:16857	Threonine	15341575	gc
Trigonelline@1.15-qppos	Trigonelline	FALSE	FALSE	1.147	1	Trigonelline	Unclassified	C7H7NO2	137.048	HMDB00875	C01004	5570	chebiId:18123	Trigonelline	5570	qppos
Tryptophan@21.57-gc	Tryptophan	FALSE	FALSE	21.572	1	Tryptophan	Indoles	C11H12N2O2	204.09	HMDB00929;HMDB30396	C00078;C00806	6305;1148;9060;4099458	chebiId:16828;chebiId:27897	Tryptophan	1148	gc
Tyrosine@17.06-gc	Tyrosine	FALSE	FALSE	17.06	1	Tyrosine	Amino acids	C9H11NO3	181.074	HMDB00158	C00082	6057;1153;4300518	chebiId:17895	Tyrosine	1153	gc
Undecanedioic acid@11.98-qpneg	Undecanedioic acid	FALSE	FALSE	11.98	1	Undecanedioic_acid	Fatty Acyls	C11H20O4	216.136	HMDB00888	-	15816	-	Undecanedioic acid	15816	qpneg
Undecanoic acid@16.62-qpneg	Undecanoic acid	FALSE	FALSE	16.618	1	Undecanoic_acid	-	-	-	-	-	-	-	-	-	qpneg
Urea@8.75-gc	Urea	FALSE	FALSE	8.753	1	Urea	Organic acids	CH4N2O	60.032	HMDB00294	C00086	1176	chebiId:16199	Urea	1176	gc
Uric acid@19.72-gc	Uric acid	FALSE	FALSE	19.717	1	Uric_acid	Bases	C5H4N4O3	168.028	HMDB00289	C00366	1175	chebiId:17775	Uric acid	1175	gc
Ursodeoxycholic acid@9.37-ba	Ursodeoxycholic acid	FALSE	FALSE	9.367	1	Ursodeoxycholic acid	Steroids	C24H40O4	392.293	HMDB00946	C07880	31401	chebiId:9907	Ursodeoxycholic acid	31401	ba
Valeric acid@9.41-sf	Valeric acid	FALSE	FALSE	9.415	1	Valeric_acid	Fatty Acyls	C5H10O2	102.068	HMDB00892	C00803	7991	chebiId:17418	Valeric acid	7991	sf
Valine@8.38-gc	Valine	FALSE	FALSE	8.382	1	Valine	Amino acids	C5H11NO2	117.079	HMDB00883	C00183	6287;1182;5237032	chebiId:16414	Valine	1182	gc
Xanthine@18.22-gc	Xanthine	FALSE	FALSE	18.224	1	Xanthine	Bases	C5H4N4O2	152.033	HMDB00292	C00385	1188	chebiId:17712;chebiId:48517	Xanthine	1188	gc
Xylitol@14.66-gc	Xylitol	FALSE	FALSE	14.665	1	Xylitol	Carbohydrates	C5H12O5	152.068	HMDB02917	C00379	6912	chebiId:17151	Xylitol	6912	gc
Xylose@14.09-gc	Xylose	FALSE	FALSE	14.092	1	Xylose	Carbohydrates	C5H10O5	150.053	HMDB00098	C00181	135191;6027	chebiId:15936;chebiId:53455	Xylose	135191	gc

## Sheet: Area
Supplementary Table 1. Targeted metabolomics.
Sid	2-aminoadipic acid@14.99-gc	2-hydroxy-2-methylbutyric acid@3.52-sf	2-hydroxy-3-methylbutyric acid@4.68-sf	2-hydroxybutyric acid@2.49-sf	2-hydroxyethanesulfonic acid@1.02-qpneg	2-hydroxyglutaric acid@8.23-sf	2-oxoglutaric acid@13.01-gc	2-oxovaleric acid@14.29-sf	3-hydroxybenzoic acid@7.71-qpneg	3-hydroxybutyric acid@1.65-sf	3-hydroxyglutaric acid@1.36-qpneg	3-hydroxyisovaleric acid@7.80-gc	3-indoxyl sulfuric acid@4.66-qpneg	3-methyl-2-oxovaleric acid@14.26-sf	3-methylglutarylcarnitine*@2.64-qppos	3-methylhistidine@16.68-gc	3-phenylpropionic acid@10.28-qpneg	4-hydroxymandelic acid@15.21-gc	4-hydroxyproline@12.43-gc	5-aminovaleric acid@1.09-qpneg	5-Hydroxy-DL-tryptophan@1.50-qppos	5-oxoproline@12.35-gc	Acetic acid@1.65-sf	Acetoacetic acid@12.83-sf	Adenine@16.19-gc	Alanine@6.89-gc	Allantoin@16.81-gc	Alpha-tocopherol@29.39-gc	Aminocaproic acid@1.27-qpneg	Anthranilic acid@13.42-gc	Arabinose@14.16-gc	Arabitol@14.80-gc	Arachidic acid@23.63-qpneg	Arachidonic acid@20.10-qpneg	Arginine@0.98-qppos	Asparagine@14.12-gc	Aspartic acid@12.36-gc	Azelaic acid@9.66-qpneg	Behenic acid@24.91-qpneg	Benzoic acid@9.49-sf	Beta-hydroxypyruvic acid@13.75-sf	Betaine;Valine@1.04-qppos	Butanoic acid@5.35-sf	Cadaverine@4.73-pa	Capric acid@14.38-sf	Caproic acid@11.79-sf	Caprylic acid@14.10-sf	Carnitine C10:0@12.17-qppos	Carnitine C10:1@11.39-qppos
BlM_pre	981	162	64	229	125694.66	13	4613	26963	855193.376	408	1459877.881	4657	NA	359	NA	747	NA	105	1864	497052.807	6562.416	309861	38267	10	2693	42935	30	70	771531	1348	5193	3032	15858974.295	2175739.171	10824944.064	718	13695	19589596.382	2862938.59	13839	754	36925705.8	5743	386974	8672	18833	13176	NA	5830.757
BlM_post	1053	77	138	279	98312.215	47	4105	11206	1170998.84	NA	1194260.829	7757	1701.384	575	NA	1137	NA	84	31211	609483.801	4989.357	247982	42074	115	1698	192625	102	130	1880283.888	605	19275	4535	17562596.202	5107820.498	8979913.555	2768	10927	15029948.017	2985430.122	24503	862	21566612.844	5992	444902	3815	33830	5340	17738.519	13583.632
QC_5a	268986	2323	64631	393977	NA	1332	91166	156979	86947596.138	538090	10434406.482	21580	203791870.638	1435	6343114.777	44541	5874883.195	28578	974548	53345566.212	6631112.101	24844395	451153	44635	7786	74969945	28883	6795	206142291.06	11190	629912	317298	36996141.38	1044712994.777	245404923.691	489510	1412232	18791583.673	10321612.792	22550	2397	371997837.754	71623	377615	7761	23721	22090	94656661.196	29005741.737
QC_5b	194170	2472	63948	400177	2325758.276	1211	87170	146804	74483027.48	523456	9700577.814	19311	179239479.476	1550	5792735.516	46936	5222558.529	26015	985132	44570602.963	5316749.998	22283595	441545	46035	5998	79083161	27827	6801	165266100.647	11124	595908	314767	26703919.333	873719977.883	227835579.423	474110	1342250	19363119.564	8911607.707	22793	2452	324335256.044	72880	380057	5453	24728	20173	75915762.94	21291270.829
QC_6e	NA	NA	NA	NA	NA	NA	NA	NA	NA	NA	NA	NA	NA	NA	NA	NA	NA	NA	NA	NA	NA	NA	NA	NA	NA	NA	NA	NA	NA	NA	NA	NA	NA	NA	NA	NA	NA	NA	NA	NA	NA	NA	NA	NA	NA	NA	NA	NA	NA
QC_4a	326291	2101	70680	378679	2241946.993	1492	134224	145876	90252619.432	506208	11814117.721	33058	191706669.926	14549	5965672.857	48952	5879706.108	29465	1498498	47071899.74	5513826.426	29266523	426984	46429	9629	62926163	30097	7935	160453131.666	14806	876212	378828	60768938.485	1177605278.004	205091174.537	345823	1338527	17333813.441	21236234.15	17139	2286	306760074.016	71429	367007	16547	26159	26499	86228525.6	23916518.438
QC_5c	212363	2968	68112	405250	2541444.932	1429	87674	137461	91253202.505	512851	12767612.422	22427	218989407.945	1545	5944926.678	45810	6108633.616	24424	915987	50546327.683	6345323.631	23228308	442921	45107	7193	85347479	27594	6522	183136140.395	10256	584939	301156	31849770.942	1102225298.316	238888910.756	397809	1298843	18032340.242	10823810.001	23501	3156	348196827.996	74091	380297	5417	26611	18468	85937730.996	22942479.398
QC_6f	NA	NA	NA	NA	NA	NA	NA	NA	NA	NA	NA	NA	NA	NA	NA	NA	NA	NA	NA	NA	NA	NA	NA	NA	NA	NA	NA	NA	NA	NA	NA	NA	NA	NA	NA	NA	NA	NA	NA	NA	NA	NA	NA	NA	NA	NA	NA	NA	NA
QC_4b	326653	2061	72902	404311	2515699.511	1576	128873	159715	76677637.411	536736	11077828.675	29885	176393428.499	33771	5225605.481	68339	5929972.141	32595	1037061	39356265.683	4993683.92	30430983	460040	46351	7554	76485178	30011	7779	146819581.361	13365	726212	360603	63392008.525	1106193639.725	198345131.702	350572	1290535	16371692.376	20630418.407	18620	2255	303042423.538	70485	368873	18534	26751	30147	80146467.077	22950737.387
QC_6a	294012	3265	101548	527164	NA	2138	68921	181577	NA	578705	NA	23796	NA	17689	NA	34202	NA	16065	709028	NA	NA	23549283	508531	67393	6975	55096610	25686	6430	NA	9426	569635	304309	NA	NA	NA	276195	1131225	NA	NA	23442	3409	NA	91036	NA	14788	35574	38822	NA	NA
QC_5d	223145	2357	68537	401804	2441053.81	1209	84665	113907	80463109.923	485085	10282708.207	20998	195459429.212	2235	5333614.322	42911	5189358.475	24369	975206	43942932.766	5753937.247	23237974	412708	41016	6151	86461726	27009	6003	159418487.241	10684	558662	295313	30267237.673	941981119.49	211740145.155	380898	1285863	17734062.323	9570353.34	23599	3732	314695274.902	75145	381508	2300	26630	13900	77224243.082	20370529.017
QC_6b	249790	2787	103847	540254	NA	2233	72984	179715	NA	589306	NA	25234	NA	64976	NA	39255	NA	21745	883578	NA	NA	23145950	504519	68188	6702	58169272	23506	6220	NA	10021	598663	316562	NA	NA	NA	309492	1261856	NA	NA	24196	3615	NA	93754	NA	20451	36197	37987	NA	NA
QC_5e	214189	2803	68239	405908	2502405.231	1604	82625	38704	89061882.902	449741	12197462.558	22323	221972276.516	697	5847081.807	43562	6269723.841	24616	1011943	45587171.888	6292998.041	23302291	382165	38741	5809	83986743	26217	6070	168200973.301	9916	536302	305640	40526249.552	1107781201.106	216855944.74	343282	1324727	15563014.265	12170851.611	24762	4848	331638172.427	72907	384182	917	26814	11483	71605729.002	14675457.882
QC_5ee	NA	3013	71924	430277	NA	1435	NA	25286	NA	428860	NA	NA	NA	931	NA	NA	NA	NA	NA	NA	NA	NA	381986	37834	NA	NA	NA	NA	NA	NA	NA	NA	NA	NA	NA	NA	NA	NA	NA	23540	5229	NA	80285	369349	662	25051	9896	NA	NA
QC_4c	319081	NA	NA	NA	2431284.198	NA	128391	NA	87873908.98	NA	11203126.388	32925	200189965.547	NA	5779026.732	55393	6402087.681	26845	994422	46732955.712	5723573.356	32875426	NA	NA	13049	90476820	32327	7478	160178477.073	13767	726874	354784	50525212.785	1027820043.265	208467776.539	333135	1356525	18407447.112	15652995.926	NA	NA	331573934.359	NA	366361	NA	NA	NA	86408436.672	26219454.42
QC_6c	296759	3474	105918	555334	NA	2681	71524	157449	NA	589034	NA	26770	NA	46835	NA	38715	NA	20696	923127	NA	NA	24558039	517105	72684	7404	58627232	24952	6658	NA	12700	613768	331394	NA	NA	NA	298056	1264424	NA	NA	30926	3569	NA	97556	NA	14644	39593	38830	NA	NA
QC_6ax	NA	3937	103628	598036	NA	2713	NA	170084	NA	606629	NA	NA	NA	769	NA	NA	NA	NA	NA	NA	NA	NA	542188	73258	NA	NA	NA	NA	NA	NA	NA	NA	NA	NA	NA	NA	NA	NA	NA	22521	2973	NA	99543	NA	9530	34208	30555	NA	NA
QC_5f	NA	NA	NA	NA	2421285.951	NA	NA	NA	79209554.475	NA	11705574.514	NA	173029760.487	NA	5355143.292	NA	5552408.377	NA	NA	42859296.488	4439943.749	NA	NA	NA	NA	NA	NA	NA	154975746.339	NA	NA	NA	30605615.265	914779901.415	213219827.152	NA	NA	13336016.816	10062826.894	NA	NA	303978810.323	NA	NA	NA	NA	NA	47103155.043	7462802.149
QC_4d	NA	2206	78384	427412	2122902.084	1649	NA	160160	82122567.328	550471	11504290.003	NA	194840951.014	61053	5387665.628	NA	6037047.895	NA	NA	44504568.891	5490658.385	NA	477922	50759	NA	NA	NA	NA	152847877.156	NA	NA	NA	49599260.834	935127204.017	208926776.267	NA	NA	15339455.197	15957579.675	20935	2398	320399906.709	76726	338784	12243	28480	31223	86627602.622	23131011.414
QC_6d	317638	3850	106786	546993	NA	2367	82262	150531	NA	579314	NA	27749	NA	43864	NA	44075	NA	23795	1039853	NA	NA	24160912	506738	69359	6898	59761725	24747	6859	NA	12791	690737	336747	NA	NA	NA	315278	1335674	NA	NA	31183	3349	NA	92503	NA	11511	42240	16562	NA	NA
QC_4e	NA	2770	78421	423913	2210805.729	1754	NA	156622	63235270.187	553460	10183300.034	NA	154376586.676	30903	4159115.637	NA	4558555.554	NA	NA	39199502.294	4410407.504	NA	484671	49068	NA	NA	NA	NA	134607942.826	NA	NA	NA	40492254.794	301714140.948	180387937.655	NA	NA	12433937.884	12578459.473	22526	2984	274268741.866	75737	336168	11809	31207	29533	61889202.297	18222731.33
QC_4cc	NA	NA	NA	NA	NA	NA	NA	NA	NA	NA	NA	NA	NA	NA	NA	NA	NA	NA	NA	NA	NA	NA	NA	NA	NA	NA	NA	NA	NA	NA	NA	NA	NA	NA	NA	NA	NA	NA	NA	NA	NA	NA	NA	295903	NA	NA	NA	NA	NA
QC_4f	NA	NA	NA	NA	1982177.084	NA	NA	NA	68834162.509	NA	9948567.357	NA	170625977.471	NA	2240098.947	NA	5270865.506	NA	NA	37487066.397	3625773.887	NA	NA	NA	NA	NA	NA	NA	132201197.627	NA	NA	NA	45270903.976	237610237.092	84236894.733	NA	NA	14193003.26	9499763.771	NA	NA	70457109.556	NA	NA	NA	NA	NA	8667475.476	14950880.529
QC_7a	277981	3255	90612	485841	NA	2261	19006	178126	NA	555728	NA	21764	NA	10051	NA	49070	NA	17167	1124929	NA	NA	25864005	468529	62515	7769	72210685	25541	6908	NA	11423	664465	371053	NA	NA	NA	227275	1330799	NA	NA	27775	3690	NA	82195	NA	10478	35269	19855	NA	NA
QC_7b	340622	3613	99516	513959	NA	3167	16961	186596	NA	567029	NA	24429	NA	10748	NA	36972	NA	22238	1246872	NA	NA	28153609	487690	69121	10258	75677939	23517	6215	NA	12634	745833	382883	NA	NA	NA	251917	1377021	NA	NA	30714	3869	NA	90034	NA	10174	39434	19248	NA	NA
QC_6aa	NA	NA	NA	NA	NA	NA	NA	NA	NA	NA	NA	NA	NA	NA	NA	NA	NA	NA	NA	NA	NA	NA	NA	NA	NA	NA	NA	NA	NA	NA	NA	NA	NA	NA	NA	NA	NA	NA	NA	NA	NA	NA	NA	NA	NA	NA	NA	NA	NA
QC_5aa	NA	NA	NA	NA	1934533.668	NA	NA	NA	61302680.416	NA	7978933.723	NA	140936504.489	NA	3271390.943	NA	4369807.063	NA	NA	33424740.704	3385079.712	NA	NA	NA	NA	NA	NA	NA	115857308.18	NA	NA	NA	38622830.335	896214948.874	170992154.609	NA	NA	10569164.808	11012895.31	NA	NA	234234660.297	NA	323700	NA	NA	NA	54680038.843	9496429.558
QC_6dd	NA	5257	128956	604974	NA	3589	NA	27185	NA	555619	NA	NA	NA	48097	NA	NA	NA	NA	NA	NA	NA	NA	519419	74692	NA	NA	NA	NA	NA	NA	NA	NA	NA	NA	NA	NA	NA	NA	NA	33735	3842	NA	118853	NA	3127	48557	9937	NA	NA
QC_7c	325789	3485	97995	479948	NA	2376	16352	167483	NA	514052	NA	28155	NA	7664	NA	40293	NA	21016	1342592	NA	NA	27711214	439469	58325	10162	71205245	24291	6823	NA	13453	798877	379659	NA	NA	NA	221504	1388697	NA	NA	31992	4162	NA	88462	NA	5085	40140	14415	NA	NA
QC_7aa	NA	4196	102153	516495	NA	2538	NA	154171	NA	539918	NA	NA	NA	18049	NA	NA	NA	NA	NA	NA	NA	NA	465725	55342	NA	NA	NA	NA	NA	NA	NA	NA	NA	NA	NA	NA	NA	NA	NA	32323	3630	NA	94671	NA	5978	39667	14275	NA	NA
QC_7bb	NA	3563	98174	478391	NA	2479	NA	162424	NA	527022	NA	NA	NA	8037	NA	NA	NA	NA	NA	NA	NA	NA	435751	59469	NA	NA	NA	NA	NA	NA	NA	NA	NA	NA	NA	NA	NA	NA	NA	30557	3538	NA	87436	NA	4543	39492	14095	NA	NA
QC_5bb	NA	NA	NA	NA	1943358.381	NA	NA	NA	69683646.774	NA	9386599.578	NA	164713448.446	NA	3966869.349	NA	5029891.215	NA	NA	36389932.755	3662575.649	NA	NA	NA	NA	NA	NA	NA	127567527.353	NA	NA	NA	36641990.96	909735650.626	178823736.519	NA	NA	11117942.631	9694414.301	NA	NA	259677990.05	NA	NA	NA	NA	NA	18273747.558	17310091.315
QC_6bb	NA	NA	NA	NA	NA	NA	NA	NA	NA	NA	NA	NA	NA	NA	NA	NA	NA	NA	NA	NA	NA	NA	NA	NA	NA	NA	NA	NA	NA	NA	NA	NA	NA	NA	NA	NA	NA	NA	NA	NA	NA	NA	NA	NA	NA	NA	NA	NA	NA
QC_7d	354124	3982	99652	483653	NA	2321	16196	155510	NA	498281	NA	27629	NA	14453	NA	39144	NA	25316	1344809	NA	NA	27507496	430289	57508	11239	67752000	24579	6867	NA	14445	843344	408519	NA	NA	NA	165938	1380225	NA	NA	31518	4551	NA	92136	NA	2074	41450	13833	NA	NA
Control-4_1	238409	1511	28795	272930	760695.571	878	25127	122257	3411515.512	75782	19562516.32	13002	78564573.334	2745	2210655.437	51709	446448.21	41583	763424	44666093.959	12437956.599	22691551	115714	16704	10805	56294269	26268	7326	188620037.421	9908	3507440	354099	36476702.856	1070697378.724	338495371.472	299409	1549713	26909446.797	13667150.251	10368	798	432921647.008	46723	175121	26408	22362	51191	46182955.775	18081582.931
Control-6_2	359899	1623	28934	294176	1479417.806	1221	110260	128851	30083553.524	842058	9778395.052	16802	255614816.187	1797	4893867.535	32419	1149254.139	51535	446420	42982400.928	5185808.155	31334153	700847	107194	16028	60418816	26316	7829	154338974.344	18884	538883	446603	55307230.072	1422451005.579	296963515.836	397575	2294064	18778509.436	13688840.177	14201	900	394664518.7	57451	142508	12043	24028	24450	59378589.953	19413304.517
Mild-7_3	454754	925	42658	179452	1047814.753	1409	308419	134370	3543487.452	72899	23129958.287	37142	191843082.992	4484	3773914.569	66033	10463160.378	97907	2713735	62444029.914	5123902.147	45039211	151723	9053	15809	163594788	36301	10707	238471563.99	19804	1126500	437001	62619418.585	1126215212.809	390484964.573	845144	2596180	21192886.164	27201209.197	10488	791	451860430.911	50255	216287	8561	24158	32477	22464439.216	16803944.73
Control-8_4	234006	1866	97483	323146	1220897.353	1339	48663	134758	2180358.435	266707	11448598.986	22048	113041788.78	3935	4090759.622	45268	3663920.628	71534	807995	57919161.981	5408757.872	21136503	238083	31732	8892	42391505	31225	6766	240920846.14	7337	462679	247792	68449147.313	1270941836.885	387500675.785	686864	2854587	17986474.362	16859560.796	14313	435	438821138.022	89945	200316	7790	24389	26073	99284641.446	18356052.445
Moderate-10_5	203942	2820	75264	138179	NA	1757	375610	153868	5877463.018	118273	35411589.835	24400	451716610.004	3046	4517095.332	97500	7457474.914	95630	1363962	53949644.929	3498324.695	20459470	150491	20850	9867	77845379	33131	11064	174234422.815	25516	785450	668197	77706402.595	1373469010.002	231994772.917	596805	1847762	20323955.456	23355051.328	11019	773	351831683.854	51215	173983	14371	24169	29000	101436865.168	24935914.097
Control-12_6	349610	1474	65763	364458	809962.372	1613	61939	146557	2878688.199	309817	8536706.778	19459	144220257.467	31508	4079624.512	95336	13776787.982	100220	849681	57558527.765	3677429.791	29518501	287827	39869	8178	60546463	25244	8101	229157402.106	9975	510593	310513	48830758.968	678213454.551	413644978.966	903079	1654576	17540597.259	17313149.352	11777	565	500163787.621	67929	167781	20570	29392	60449	68175823.364	8243003.136
Moderate-13_7	416622	1386	72938	495211	803395.125	2735	505618	142036	1216454.079	223982	13718524.62	22177	66300473.735	8259	2680807.812	30225	760350.786	21484	731734	55114681.215	6951938.568	31625847	246789	30903	9340	64855320	28886	5446	214476793.71	6867	788965	238624	54081741.465	1564696762.938	207459345.783	971905	4312907	16642430.047	13390063.438	15698	659	309925130.919	206977	174095	10498	25040	19466	62066359.749	22049125.862
Mild-14_9	279959	1566	165792	260437	717616.742	1388	202387	161558	5544461.089	107011	36457535.404	21810	112732365.541	20443	2138583.404	53591	2892046.333	46067	2217271	75177067.244	2962869.204	29626768	196782	6621	12986	147793198	27423	8838	240748091.354	8950	565335	281168	36203710.483	1608860816.518	336951980.952	459039	2479622	17892754.437	11145501.366	10935	2991	343305153.489	58075	133937	7630	23891	15242	162352577.637	32596794.573
Control-16_10	274766	2132	84451	675412	1278315.125	726	352298	176838	3673958.058	1519344	13419242.045	21971	48740690.739	3592	5981425.201	36090	2819964.922	20353	864250	73734530.337	7355790.521	27350743	1143115	169114	9487	61369841	42209	7830	248397041.535	6520	624301	309665	41776941.888	1574297960.216	343367810.407	621091	2766873	18505217.639	13539783.118	10836	989	530124374.055	66824	226434	9196	21877	13896	103580759.725	31377652.988
Control-17_11	273814	1483	46541	185290	975605.685	1066	90404	151999	4625508.704	169508	13583587.484	18628	224331076.671	12901	4508754.226	64816	4332278.734	49370	1604774	51879031.935	2778120.45	22481610	335272	30867	6573	63615809	28226	7458	158176364.564	13478	437282	285657	37077466.951	550408108.533	339542306.865	540134	1605449	15402031.017	11312819.965	11619	700	425931390.737	66197	167868	13481	25268	19448	10173968.58	4162055.317
Mild-18_12	610486	1737	47326	256285	823058.397	1055	160454	185239	5065102.44	200621	17698883.994	19844	614734884.203	3472	8866924.716	19979	11533801.065	12555	1939009	87200867.475	5781244.398	24086726	215323	28503	9686	85001852	33969	864	258737516.09	28546	480621	245566	23546404.565	278678391.743	307436035.868	604964	1144058	18212998.857	5257949.418	11171	400	369384847.345	37908	267323	11380	25225	38162	31535716.192	9975826.513
Control-19_13	395714	2098	47145	365188	1416487.796	1235	200587	149861	2170621.493	986237	20549045.005	21826	59237955.252	3434	15438625.689	43120	2694677.87	60443	1077478	41649129.031	5332330.034	26416645	772644	150795	8866	61886617	25076	4938	168114605.254	4076	775516	347228	77581873.466	1412943022.808	335983160.696	508110	2559578	22447242.106	18800416.916	15862	1232	259904919.232	74654	199281	14858	19077	11619	73983591.56	19819245.494
Moderate-13_8	349436	2006	52940	234302	1102289.088	1524	289685	168613	4236205.309	151193	22468571.129	30745	192124906.416	3287	2877286.692	36586	678114.729	25224	1540078	62861380.99	5738498.341	34148840	200945	26106	14912	110736456	38121	5590	213992622.347	13658	766486	354110	114239281.301	1811449263.137	262218424.798	603240	1444321	21492669.002	101768900.755	11982	339	331594532.804	91800	180144	6962	22759	17354	107944673.979	37319065.003
Control-20_14	407077	1401	29826	510644	996034.87	1103	81991	163556	2438567.127	1269047	9054365.243	21627	152032431.633	4462	4962825.034	39344	2225707.825	41945	972754	41754676.341	4345318.081	25686466	956727	191408	9257	50796524	31884	6967	166865503.127	12222	673268	225888	71495395.265	1127706166.281	340990097.449	460535	2799067	17352627.624	16917004.763	13316	2507	289609429.064	63063	202526	12014	23434	24787	59728348.43	14153188.564
Control-21_15	241289	1816	80821	881911	395534.233	1532	168624	168778	NA	3577617	2099526.397	17662	5782555.277	2002	513629.357	27623	82176.088	17876	1220096	15255553.974	613425.751	27798401	2433654	319196	8161	81946246	29409	6080	72324420.21	3308	601710	211900	18131808.06	328573839.024	145249237.302	643705	4345016	13096749.179	4423139.665	11516	1202	83584338.737	41508	213342	12906	22431	32821	5136985.199	2774755.36
Moderate-26_20	301795	694	76643	775969	144196.475	963	306076	167518	1527745.342	356930	17323209.679	25972	81451640.802	5600	4187616.882	21953	1033181.722	8880	915787	65918828.525	4003310.77	27603914	305704	62541	11371	69349355	43947	5569	254874934.16	6018	535850	135008	86285674.003	1394727374.446	393980134.897	670363	2357566	19433948.558	36912521.137	10236	741	739416144.198	72548	166623	13736	24245	67051	43649951.739	16364210.542
Control-22_16	847526	5995	65941	268597	5070759.06	1039	873419	149895	2158329.534	145413	21704753.003	22422	1230302685.115	6682	18304441.048	31507	342375.355	14940	1028241	85303208.401	16439538.815	32677238	161440	14916	11542	123206044	28356	8134	308332363.993	60799	852012	766787	54246492.229	1162204049.046	398480570.2	986820	4318962	17469923.822	18379937.313	13137	3382	321877081.844	40491	179028	9643	24193	28840	108142544.567	44067409.724
Control-24_17	288499	1856	63303	252627	1000050.925	762	569281	154938	5473478.687	118102	14962952.364	20307	2387002.349	6422	4461240.074	20534	318616.297	14933	534342	57233227.225	5372283.542	26816722	180737	19999	7530	79380388	39138	4477	219525217.305	2985	483023	281479	38808304.89	571833711.907	411991313.997	490405	3613723	17306151.405	12756822.85	7812	918	470964529.143	59818	203446	6847	17015	11498	34944852.354	10258600.865
Mild-25_18	92388	1541	42979	227352	609183.308	912	13849	170549	5948969.375	109620	16973297.508	9823	150143120.665	6980	3196715.796	52119	1407152.46	42904	324819	72034153.767	3664743.569	13080641	162849	13731	5219	19905482	13829	6238	244671356.519	11029	199172	114771	41535726.624	460569359.164	224763983.493	210963	390117	22114684.21	21391459.109	8118	184	458733732.491	43186	214997	8671	22536	25578	25143160.288	10157497.414
Moderate-26_19	500269	2882	109147	1072691	995870.596	2047	248407	191070	4687747.126	417280	27127590.02	23144	383870015.484	8077	6988517.815	25639	13101478.347	8569	1109109	109626284.653	6886760.017	29748651	288474	40360	10643	138792302	47410	6170	368368061.84	16884	569228	283095	63493565.894	937933498.695	373802620.423	546392	2563588	19100915.613	33772435.253	12400	569	610309461.924	78161	213809	9832	22828	18683	76812612.888	33486266.58
Control-27_21	211480	1162	304401	59106	2999923.39	1298	42927	125267	998077527.59	61912	11942918.602	14011	19541645.088	13905	48008161.089	22597	403220.135	31842	417325	36292273.416	8307519.299	23261233	143601	9662	9868	56790217	21506	3995	140800205.539	2267	888203	466905	30248546.56	631318734.416	161459358.938	170832	899600	20317915.941	10821856.143	10335	859	589163554.454	41340	188211	9212	25802	29771	43482448.874	12460852.405
Severe-47_36	457767	1154	194896	711820	1477656.204	1106	355199	122956	1855948.225	209741	10725506.211	20110	1563751.337	1468	1194021.096	13719	131859.088	15537	775146	58949259.721	5608908.686	20293457	167574	28894	11550	62460019	30437	3904	212091544.904	1409	449825	206267	144116190.475	3449299050.286	374078773.113	1027087	3259720	14223008.678	113570713.578	11271	2601	201070012.598	41150	166669	38315	21219	81431	8145016.737	3803293.504
Control-28_22	133096	3354	30412	113399	1749784.092	521	96221	151933	6516341.791	74578	9993067.631	19649	539821361.66	5705	11948886.348	20408	10657853.006	20452	1852853	65837134.669	5744430.278	20720925	125828	11903	9636	65558486	24994	6909	241294897.004	28189	427513	342058	190825639.377	1074655381.526	197662238.961	536242	1021643	18317950.041	44478962.256	10717	1276	421713168.868	50901	169583	9175	23931	26701	41130563.332	13065184.83
Control-29_23	213410	3280	67257	142677	1783515.202	941	126430	163911	8211365.314	89536	12240724.284	21527	626258519.663	6686	6945436.152	87502	4025841.539	94311	746353	49844090.207	8022264.064	23114919	148401	22792	6999	66839287	25958	7727	169831048.312	24904	413999	342143	47078223.349	1182112288.029	263139737.208	446782	1486399	19590101.393	18489186.772	13644	1356	260530611.223	96918	206034	13177	27795	36039	48943200.983	10199236.042
Mild-30_24	255762	844	32265	271373	302666.032	1070	96665	140272	10009381.021	58595	9716725.129	15930	131094486.912	8232	1746448.172	32029	9022066.973	27947	854536	33723778.59	8095559.514	21278683	141580	5628	5792	92572144	27020	6035	108114493.291	7925	404439	269107	33102350.33	1086293353.635	287161586.154	550436	2637767	15948063.325	13419913.912	13921	1285	461234146.997	67842	216604	12035	26392	28910	7008775.827	5739121.158
Control-31_25	314733	2990	60770	634770	919306.92	1138	201124	190489	3113921.183	328033	17760503.246	22026	275711995.403	19361	4762591.815	40420	1694996.374	17569	498911	72257675.113	4735304.496	22977066	281854	35195	13894	87686067	43728	7653	264608888.186	15260	502857	282555	47318275.32	1086253573.69	343402016.187	240591	1335432	22066996.823	16812355.705	13721	680	379277932.998	76956	238770	8484	28692	27637	173561644.676	36267682.94
Control-32_26	399225	3314	84660	269203	3778092.859	1744	83481	166671	22950404.822	620938	12815637.776	14245	285523789.655	2813	21692204.998	16777	11881139.354	19439	1027590	42989763.037	5505636.318	31665195	519807	93661	7791	58559966	27335	4007	156598719.202	11682	624263	439304	56078095.504	1249224938.666	210922348.716	355426	1246007	17917387.689	17057522.353	13100	1116	399715466.239	70374	202532	11347	27307	35085	168097765.088	53755873.739
Control-34_27	341452	2151	69313	217754	1442811.69	1784	70575	153192	1920269.214	154421	10563839.101	16652	187454417.927	10878	8234486.284	43434	10042377.7	34606	1550180	79460966.954	3169846.546	22333755	153815	16433	7867	107791809	17944	5146	277169582.601	11296	740019	302400	24839537.895	408528185.734	322459117.772	527600	1664779	18862584.486	7386026.342	12163	866	458159990.596	82141	165371	12089	28868	34234	26649224.845	7540305.519
Control-35_28	189867	1883	28865	248687	1671649.499	980	62781	153680	17631815.244	123272	7824700.556	9372	222517826.141	18818	2819317.99	65505	595260.554	77966	267750	47051599.409	5189507.547	18311959	175538	8483	6166	25393812	17058	8985	165573472.804	10751	357765	368229	53662330.538	1201305405.102	258108454.802	190120	1167927	16875634.078	17031513.138	11726	1362	241317086.744	54437	201095	12357	25107	25228	343881485.517	26711853.032
Severe-47_35	243756	925	145632	759760	1788751.579	1769	145320	159471	2943224.882	193779	14892879.555	21005	37368773.765	1849	4171846.264	10670	2055027.838	6949	473469	30993345.924	10607942.933	13592632	218695	22257	9976	43264215	34796	3550	125418458.776	4009	445101	190970	47951364.314	1902871239.533	266498748.817	279734	2685667	17548502.836	11849107.189	11709	2283	241821313.625	69075	213175	7482	22518	20918	74363377.512	20489592.122
Control-36_29	326725	2069	40705	373003	1347296.095	1276	117186	158994	3128939.668	460264	8185400.112	21155	186343571.659	4055	3359109.321	40475	517534.686	29954	970347	41803151.828	2868346.675	26376742	409056	19398	8206	66449643	29742	9457	157003068.728	20551	498429	335964	57835008.861	957903688.116	222278824.592	429479	1672353	14727039.166	19813943.44	13059	2072	271108199.788	78677	180182	6822	22156	19825	115176743.554	43343605.697
Control-37_30	405973	1078	42904	210543	817582.578	1098	147082	145977	3026011.333	151992	7481668.654	15002	96912176.738	2208	2975039.323	40363	2249508.491	39323	273174	72018797.527	4297141.246	36538135	192547	9157	4839	68175242	22783	5523	228152021.145	4971	389668	194146	33520100.566	843377704.899	217282677.581	442419	1396363	16076361.77	11826967.296	12526	1674	457477927.622	76485	189143	8051	21084	23700	138055246.759	32275488.45
Control-38_31	242843	2130	33944	301258	1196120.17	927	57205	152605	6995142.48	504708	5340733.05	14853	134457341.536	2377	2674296.275	55822	3285545.823	37516	1554373	38040010.097	6032719.111	19274644	443937	32830	5628	59201894	25432	7128	141383009.227	14378	312381	221945	35679272.628	999479349.762	235496091.566	535129	2253961	14441030.315	11093587.032	13152	2606	250155811.298	82077	201194	9290	24022	19546	91577845.423	19394726.61
Control-39_32	182487	964	18898	388668	924099.51	996	58199	133531	6089428.16	713909	4673964.071	20160	67342010.455	2518	2501657.134	52555	2506371.855	51893	662151	22418934.131	2493974.92	25966837	586118	22643	5292	56352114	24471	7216	103374855.821	7792	406036	247941	60208017.495	1103364070.924	240193656.171	507605	2129792	17891543.605	15567582.188	13766	2609	280233254.32	69017	207372	8118	28500	21793	57525865.821	10688846.47
Moderate-40_33	336164	1079	18245	427001	1340196.206	500	158474	141158	1778336.016	121830	11919247.617	20601	143277220.156	1047	3449285.942	25308	1603427.115	19815	364968	40677302.285	3735901.485	15868390	158866	36896	7599	56986508	36549	7102	182843980.979	10813	308711	150474	42309775.945	733994361.88	334003359.084	372237	1407772	17465021.241	15028987.153	9742	469	347762658.744	74750	171144	7775	18247	27226	15615499.229	6351121.508
Control-41_34	346182	1152	30877	103806	2015629.166	798	31960	100953	4053978.907	210580	11784305.734	15217	256186046.14	3228	3751159.71	33024	26923183.065	23785	863496	50736425.94	3551684.592	26047603	243994	11364	10428	72193046	21044	5696	172184323.698	14433	1397858	361995	76751965.189	1286353491.139	253137677.111	232174	1267669	18819979.323	21671411.08	12573	2201	354969944.563	43354	251653	5908	22240	15539	95202710.639	18445190.186
Severe-47_37	270863	4694	120456	1348033	3544992.281	1538	94086	162195	1790219.634	1488541	9564712.339	18641	4855363.186	2000	3364118.382	37228	191793.34	29011	779441	45751323.821	8768584.72	21245975	1090164	325364	10570	46020593	31992	4666	207773586.349	2213	574263	302388	54440135.501	1191305797.991	286873610.818	560809	1119149	17846189.711	11754589.462	11825	341	186116677.46	44306	182367	7706	24518	28485	29565918.763	10324428.791
Control-49_38	196194	675	40629	410561	981382.9	1178	51657	162228	4680157.014	809083	18969592.778	12283	398494249.547	2761	2928172.166	42459	7544451.454	22796	444659	46472845.595	3134257.532	19510041	663635	45722	6142	55329526	25307	8056	168046516.409	17704	304020	162738	45934620.901	2058030839.325	293111359.934	251027	1170218	16207685.984	13088064.636	13029	1828	340519218.113	79168	181322	10760	19775	19668	94800461.373	17041966.187
Control-50_39	174085	1673	25640	158107	1270744.232	870	35610	143825	3444819.197	590786	7745696.076	15719	131685739.366	1782	4010498.739	32367	9202892.251	38353	359038	29427526.554	3492063.388	19015746	497417	29436	5178	39018400	20430	5584	110492450.252	8089	465380	224925	54876142.242	1350145812.492	226323017.149	314827	1305343	18708694.704	15058131.96	14820	2414	273317072.493	82483	170605	14427	22842	31526	54207041.169	11071188.164
Control-51_40	226438	2185	27192	280629	623873.737	836	201314	165695	2316278.032	203516	8624624.521	19140	232827046.647	2000	3198057.723	30171	3351602.311	29509	793642	57631524.817	3995384.106	23908388	254537	33178	7277	75323003	25311	4589	224464614.629	16246	304522	184810	35900108.602	758371372.959	263012381.203	440939	989375	17893169.997	10593037.157	10164	1287	323103827.399	67295	170270	6878	19780	17820	7969676.489	3531478.583
Moderate-68_45	173289	2767	63516	1173563	1336031.843	1818	6611	181717	1551979.99	2182474	15367870.712	9244	127047464.098	2312	19576733.869	98510	777926.813	48976	156094	52425696.745	9488287.076	13889076	1563862	503657	7614	17537406	16939	8925	187122373.196	10813	478443	185067	63727122.584	1231036083.637	225184960.807	109612	750294	15121133.951	14827769.484	11484	539	549213003.661	70869	234810	6224	24847	20882	95141660.834	27367478.975
Control-53_41	213926	1675	63011	187124	1325475.517	941	6599	178335	2622128.24	159922	20905570.289	11946	114173364.835	1655	5793455.799	29383	3413261.317	16382	677190	78476879.305	4420149.987	21061651	178681	25010	5755	64963922	19523	7172	242430376.75	5165	309772	209639	40592971.703	903195979.499	282010700.414	208639	992739	17385450.304	21209539.968	13952	1034	530300562.717	80058	261668	9465	22721	12439	14554350.248	9080575.728
Control-57_42	168699	2013	65045	101110	996641.209	837	8690	147014	5571510.186	125478	11874996.19	15796	262994824.237	1645	2504724.898	53630	3755087.07	22759	1040737	37156572.713	3662419.287	20827338	192149	14634	5165	81467743	24085	6325	141660138.556	12498	397032	210777	50088198.517	1272464708.614	272120937.77	297239	851508	16551629.2	12209662.494	12756	1680	371859490.758	66155	201791	10127	24238	42597	42044998.602	12736351.3
Control-58_43	197742	1368	25191	287238	621055.82	1011	6632	154354	3762183.055	1179763	10876816.966	16130	141505484.565	1029	5559745.708	78248	1524959.215	50786	1390420	31013981.443	2053292.519	19733806	908778	95422	6499	30390155	24763	8458	104647768.783	8388	627832	185869	71589221.484	3268974983.285	205390279.76	170752	994442	17829158.624	33923657.155	11490	360	282319609.074	65686	195065	17422	24770	32998	872410005.837	109832179.649
Mild-67_44	208095	1791	40367	331497	2420223.239	1276	6623	164267	2458010.7	517173	18668057.94	12092	297891586.606	1996	1918462.835	80807	1220971.468	60013	903388	34879597.49	3521024.839	20285832	444517	35775	6355	47746360	27502	8451	129957289.585	15664	426990	242116	57869768.685	1338716180.173	225926641.053	348284	531715	19793640.404	16253873.575	11416	399	306282316.837	77211	208280	9448	21954	17146	81958308.714	17263805.491
Control-70_46	177021	3712	30191	460543	3040018.769	1888	38533	175731	3659111.457	1836964	36500579.828	23564	302558178.192	2893	12134670.009	75763	7480628.052	56205	610771	35245747.867	5775913.365	31451016	1375873	80861	5842	70019730	13881	5754	122077002.22	12760	695444	436652	33458790.643	2805254110.742	200062873.914	323215	1966006	21811653.53	7496567.593	10404	2061	319411713.92	59420	162914	8953	23653	18662	184890835.039	50467441.008
Mild-79_47	156656	1255	33014	199872	1528221.246	1071	9074	145284	16390803.991	172098	12688026.334	14973	185282340.23	1112	2224317.588	41780	8122073.623	13766	1429117	36480700.642	2728997.427	22601811	283242	34226	4255	46759331	25584	4582	143026006.724	10150	327683	203324	30056818.79	377576084.636	185650578.354	763869	612712	17830543.195	7945290.588	11354	478	358828081.718	50759	245981	9996	22067	19244	71813989.234	17064400.09
Control-91_48	188265	1428	38273	283109	1145909.396	1438	9508	140369	4608527.546	138279	9421520.447	16941	330949269.397	1604	3936644.305	40081	2042918.782	25435	1447511	50730221.602	7956287.819	30878953	187191	11921	6134	78496518	23885	6487	174809299.955	19107	754811	336882	50534765.728	1356336140.753	275364822.456	793375	2443064	17414033.367	17884984.696	11715	735	289715703.89	87214	181284	7312	20879	17121	35493134.044	13117757.168
Control-100_49	286236	859	38302	628712	809764.269	1877	11630	158148	2673470.134	531062	17057972.607	21402	28605523.501	1158	2121279.81	14414	3298617.569	7718	630708	48046796.479	11877657.294	35380122	471202	76438	9788	72591031	33048	4548	185526536.62	4183	351467	143097	37372644.293	732623436.811	266675690.783	435114	1132362	18407369.141	13982082.065	9403	1612	433944261.957	55545	219052	6505	17950	16125	19452632.917	15324198.026
Control-101_50	264488	4037	57115	487378	959476.035	1606	11386	153494	3570441.108	1921128	10298008.156	18896	389876067.798	1393	6531935.732	77682	717248.294	32689	756205	38156744.191	4035083.952	27124975	1446648	499950	11907	31834657	26514	8617	122022814.437	16234	532933	290287	62800570.957	991824459.218	214154073.086	219451	1135906	14151060.177	16756135.376	14996	730	510658630.348	128044	207067	10324	23447	21282	54021983.15	39031974.37
Control-102_51	165834	2145	30619	316793	900433.644	692	5329	148488	3614255.062	139126	7685567.571	17749	183030692.589	2003	3616647.475	90580	6069768.977	53585	789374	46314246.572	4772607.233	20084470	195587	32615	6447	55732054	24521	6142	149137897.506	9592	705020	240506	29068013.582	703050490.771	185106452.962	180615	617412	25674906.088	10225085.066	9653	345	351636019.674	57660	248489	5481	19265	16402	27791754.468	6123144.274
Control-103_52	132498	1823	183963	183835	NA	2729	15233	148419	5054711.211	371487	38427015.29	10221	21425827.826	1775	518374.228	32274	95014663.432	10756	507237	22112741.738	2832038.891	18294842	925583	17395	4566	49597336	21674	3851	90868367.265	1759	652804	452955	54547430.208	815962293.935	196586717.074	296716	629292	16977968.859	13137161.975	13630	414	658786755.511	88590	201491	13992	72866	21501	31925298.724	7827877.533
Control-104_53	224786	1892	49376	356479	2293411.781	1554	16057	178700	7618763.818	926066	11173226.439	17465	321324223.977	2614	3845288.525	89156	1274138.018	51815	486381	44174350.444	7346466.529	30501793	741483	100019	8495	66754308	26282	5975	154747385.899	15598	897293	373405	57183506.524	1214252501.02	231741756.595	421204	734617	20069969.758	13885090.213	10545	480	409194183.563	40520	227190	18062	20742	18948	124093311.076	22705109.407
Control-105_54	340330	2666	42282	480498	1714293.85	1845	49093	209919	13357070.366	1486930	15215748.156	14711	419637084.023	4675	11559576.639	45966	3761604.076	30221	461015	43309013.252	6580955.307	32427536	1128798	129479	6197	111295824	32028	6271	152261015.523	17616	559454	357812	63345137.562	1417548569.288	203065798.842	358082	1397895	20146640.169	13076697.977	13720	626	289180718.072	92746	146538	9620	20255	6944	156230474.502	24272120.05
Control-106_55	556101	3413	39954	229336	2964392.599	2111	86705	164967	6329996.155	103534	14741535.484	19341	1194505562.752	3484	30562631.508	92659	2996211.035	67946	1204838	51236115.841	8769606.61	52604374	136946	7089	8399	109954334	49159	10282	181370334.999	49439	988509	628168	144472147.513	3502119730.766	374357810.324	563125	7028596	18610273.261	42834685.708	12511	2482	386162950.707	59339	188262	14552	28192	16073	305176825.191	63613136.336
Control-107_56	380747	1791	60931	440381	1597772.956	774	21305	165433	3348298.157	1372850	9734394.143	17031	355888266.846	1169	5424475.371	56780	7066251.318	32867	1518833	45591733.098	4166942.457	42938210	1020815	115230	7045	103471772	27255	8266	166964796.792	20769	545048	299388	30523336.498	899267116.142	249319204.708	428176	945875	18790383.402	12592791.756	11406	594	539689211.656	56059	221409	9785	22760	20772	367897181.348	210404876.631
Control-109_57	222304	1645	385158	1648922	1927710.437	3320	22142	225641	4460263.738	4150260	21311874.322	16218	55030562.079	3036	45606934.583	51901	1702552.366	25234	469790	88338535.732	4943355.528	29022917	2979703	846698	6393	60018665	30584	4210	309449882.403	3670	542191	275526	56663190.106	1713175553.738	258394604.779	229964	1291317	18481340.267	13800428.215	14215	555	605855505.035	117618	226994	6759	25170	21826	309172359.908	35299784.134
Control-111_58	400268	2474	65149	352690	1491489.195	1148	19353	155382	3490140.13	134665	13104273.851	17250	178841967.581	1763	5849163.672	31097	3480365.262	14198	714695	48618589.797	4503882.428	26554398	151031	30637	9743	91590667	29208	9019	175642306.639	8044	506044	240234	37931573.922	233471481.25	248060243.47	288968	848611	48697742.258	13525122.781	13156	636	357383254.829	46963	230834	6951	21865	18398	53020934.5	NA
Control-114_59	323820	2617	77018	456711	672416.498	1344	7805	164072	2781171.199	659133	7410652.349	14060	41481157.376	1490	4859061.961	41262	1476968.364	18949	476581	40853789.943	3107079.857	16663637	536260	96679	6089	41547188	24201	4787	154086163.518	4803	416807	201255	60200729.16	1258087715.779	248338338.376	233744	1987437	15952259.259	21647519.915	13939	589	273802103.997	94355	226658	10941	27864	32601	22481488.482	10555850.634
Control-115_60	185353	3386	114652	435817	1767512.637	1961	99056	186789	3426229.027	144645	24274063.746	16529	267404194.508	20241	3878761.708	82917	5462945.112	68324	1519407	72385247.873	6735200.382	25179798	176492	29052	5388	87729263	26665	6266	234629202.346	15355	247239	256042	49684725.889	1347850313.098	218173648.441	409127	1009485	16360951.254	16441273.07	20386	2398	367579869.416	163263	252221	6552	26714	24203	51780966.345	28507477.625
Mild-128_68	229916	5132	77467	256701	NA	1855	31254	164069	5658095.602	254151	15111857.006	9142	555573625.017	4368	2745490.641	24107	13002450.212	12944	2615563	84160172.464	7167531.945	24704087	213838	25969	5835	114994975	21210	6768	308617999.377	21071	605249	874838	33358473.147	336478957.771	243201627.987	748565	980768	16180769.142	12951239.846	11752	539	401895283.952	60145	218278	9857	24076	25984	21179975.642	5219154.388
Control-116_61	153823	2361	45292	268110	2089250.436	994	5631	178508	13565843.766	191711	7502857.645	17732	172504591.87	1548	2945603.82	81886	6114914.247	38965	474478	51742628.457	2692597.271	20052181	197139	15875	4239	59751610	25176	5570	173793667.121	11264	304592	185462	27919586.737	758219333.547	235663420.787	248245	498794	15824249.911	8170854.59	13956	339	316467624.542	82914	220814	8598	27423	30127	157596362.691	27651918.474
Control-121_62	147430	1149	26787	364477	694247.242	958	11827	156843	9570086.407	160190	9491879.451	16873	93978345.052	3576	2472539.931	54281	20506770.949	22766	719557	30791740.729	1897737.899	20544095	201507	32279	5598	103512701	27111	6281	137662088.871	6268	370670	179634	26481473.82	507470791.294	193915233.863	385548	486777	20773628.021	8715874.622	15360	628	283749330.182	72841	221682	16675	33421	56261	50286023.997	9930614.146
Control-122_63	256634	983	38780	315778	761059.918	824	7590	157318	5435977.473	162783	6775478.887	18863	145765180.17	3517	2361059.089	97150	8132046.94	44451	839878	60911761.561	2622872.398	24405414	194961	37356	6906	116154782	25764	6481	210804268.615	11861	438031	244994	58764300.81	1130342384.18	250495188.933	342121	775920	17884362.211	25958852.907	13237	1375	345095780.73	84916	204767	7839	24437	21548	28219932.504	13000089.069
Control-123_64	104048	2849	46365	277504	2112999.038	963	11637	165645	495915505.842	263953	42950765.451	12297	122108826.599	1599	3378764.23	70285	7098232.325	37115	643657	47051088.167	4672146.297	16221887	260665	36382	5182	69340829	23754	7054	144374467.199	5414	309628	451661	171731841.12	1313502804.275	192091134.165	288360	506895	22484040.717	50655292.827	12931	775	393942986.004	67070	222758	18871	23042	13317	151083014.621	25695709.108
Control-126_65	114356	4084	129594	678479	2591134.293	1452	105003	200573	8124543	478166	16992016.8	11294	476908429.17	2081	17973206.974	15381	504919.113	4980	146618	57749748.065	8105612.114	14067914	402183	41879	7497	35059073	37274	4863	177287013.983	15518	793684	381125	51934586.97	1618446032.744	214593297.981	121855	897891	12777586.006	15704909.617	14914	1709	306571110.156	47260	238500	8373	22419	24842	85151718.503	22346358.606
Control-127_66	144472	1936	25167	131982	1857282.971	993	5544	131784	2682850.433	237095	7459187.012	14930	511621702.24	2283	2575173.325	18827	2778675.8	8796	1484800	25245869.171	2216697.717	24323354	243705	24425	5272	112847007	25289	4102	94244182.475	20411	506604	368006	33952622.71	729385621.949	215111462.043	323901	664945	11961906.032	9262629.765	11115	550	206933106.524	63287	239820	9369	23617	19836	35741043.839	10980608.376
Mild-128_67	335882	4033	28178	313601	2010195.249	1717	122565	167986	2998721.749	216012	20378630.807	11169	566141428.148	3468	2152284.015	49834	5994781.795	16823	2777389	95121296.356	6272698.157	32985168	183825	25579	8782	121272741	26006	6357	338312139.702	20908	654571	570741	36125069.328	380803208.097	268102088.798	651560	701447	13668831.866	22663305.812	11494	629	545037076.531	68081	232595	5552	21512	18736	8821494.87	4479566.884
Mild-128_69	259661	4994	54338	368693	4024139.726	1653	15187	162413	3283690.663	191917	11043950.386	11394	628266943.607	3309	5284094.593	39716	8271843.993	19259	3038222	50923159.974	5876996.948	21777243	192370	22609	6220	89011559	23463	5418	190070294.74	22293	380758	456415	54706471.564	568749021.755	196048346.269	459336	795734	12913362.248	14772663.344	13859	858	351252112.608	75130	247244	6712	25306	27755	23111215.261	4203452.673
Control-130_70	167912	1505	19502	359212	777622.397	654	6259	159441	3990185.191	942786	7910395.883	15045	34104691.039	984	4276398.047	67900	6343039.73	28055	442950	34367352.97	3343673.689	22617793	789096	115415	4688	48048626	24202	8430	115341660.675	2811	264734	206449	61177082.611	1007025387.994	171600808.156	234069	568348	13056740.556	13351189.895	14400	541	239682546.531	81561	257221	13066	24985	25036	80058889.288	7859499.101
Control-131_71	137771	2103	52518	150401	762695.005	799	5064	156129	3043465.005	57978	7851094.081	18465	173251875.291	2338	4495901.724	91108	5120225.099	50420	658737	38409168.933	3050649.458	23972578	117669	6129	3863	100337688	19631	6072	119026434.76	7076	354995	202395	31643269.787	597289513.272	248701343.301	283596	763407	13832955.97	8013792.223	13388	436	191103646.005	65379	220687	9537	28311	29517	40325229.739	8857949.509
Mild-133_73	218639	1674	28674	214339	720810.241	1210	24212	172321	2906413.418	95076	9230933.2	10088	251550884.168	1839	2839561.667	72130	7782454.108	57317	1827022	28256480.676	2086147.001	26024173	147144	9994	6310	124808569	26353	10882	101210101.049	17243	415218	238864	25430765.469	478547365.738	201217638.885	456501	1343631	13747073.758	11705719.178	12173	905	201777110.258	68019	207120	5786	25125	20745	18066649.576	13650237.662
Control-134_74	154077	4641	181172	554678	1795632.874	2855	9761	188663	2769098.796	194801	15933410.753	10871	313033718.572	12198	4673433.441	22641	3289064.598	6727	1397588	48027756.833	3946064.084	16196693	201260	18973	7104	68864638	26593	6003	153584763.166	14383	504905	366404	31587053.698	622686933.854	178270096.987	163541	534503	10851971.55	11726214.453	12912	533	234139458.493	71352	261956	10321	25271	22753	47232167.795	30808090.631
Mild-137_75	155529	8216	28254	342724	1228805.195	1345	9289	151431	3150677.073	135830	10775452.006	10079	224721500.275	8039	6896183.402	106156	2477002.827	64640	628227	45944792.128	3459853.628	21278938	145984	28261	5331	87319153	26059	6644	193001670.068	11029	601914	426933	45005828.567	1147696449.89	239402256.27	524320	634123	16662685.161	21912342.754	12099	724	486955740.192	80793	156025	11556	23242	34663	40580458.762	21175178.973
Control-138_76	204210	1511	28142	283936	373231.516	885	4690	152316	5068225.123	220705	8771646.761	14560	128742481.547	2889	2074176.951	27440	2488410.944	12189	952362	38563765.231	2260253.535	20920706	224029	37681	5114	68710678	26479	6378	154586906.186	10881	441017	161864	44213527.561	566427869.091	203578832.079	227703	638075	16742253.246	14159195.322	14788	492	264361291.972	61633	216641	11879	27767	33445	30890300.047	11267959.507
Control-139_77	166810	1900	19548	334166	946456.332	1934	90066	137215	3462651.04	390480	14367872.46	14175	378789960.174	1390	2889393.674	42686	10845511.831	25144	496755	23615857.993	3495346.421	25154563	404180	84890	7684	76896626	28676	6277	89468765.139	16334	469827	229753	104826884.269	702112285.202	177874386.953	487823	455514	21035179.983	30071715.071	12967	755	246691212.08	78373	245554	18726	30842	37072	72913973.278	15940271.883
Control-145_78	309025	3391	65719	229196	1388194.852	908	7330	156377	3301279.394	114569	5917946.281	11646	170600901.464	3395	6531446.86	79302	10002772.019	34508	473556	47535664.691	2789386.188	19219534	171251	21312	9048	53220423	26629	7752	133677649.536	10932	1567573	507783	27996015.146	409687259.661	178106854.548	184238	895175	16879672.549	8495039.275	15400	673	365518377.222	84309	218148	7130	26253	16028	22711843.714	10194576.617
Control-147_79	270533	6536	21568	456336	2484334.252	1398	21889	164741	5227603.679	2118886	7001729.731	15324	244935045.829	2170	7340695.371	36983	460556.521	20482	959924	24114324.023	6975933.769	22974939	1531083	217096	6282	64513008	26888	7450	85403543.463	11626	349929	519794	55231162.025	677968032.513	166197342.162	253891	651965	11867364.725	17887180.686	15856	769	342375172.107	66823	228525	12010	25134	26449	75466989.574	14238116.074
Control-148_80	192715	2023	89473	238684	NA	1475	10639	151152	4056409.005	63714	10904555.09	15717	291376197.808	3299	3994427.126	50551	18825510.14	20331	465971	37295926.518	5154557.718	20998871	142799	18051	4799	85759011	22906	5552	134404813.662	12355	334510	188389	43292540.687	944508038.81	195617985.115	343514	545675	15099371.998	12051917.341	14142	941	315544748.941	66631	213128	12407	31979	32857	878257370.056	47551520.411
Mild-149_81	350101	2556	37487	181456	1572696.208	1112	11188	151252	17043221.859	273423	10353287.838	19241	208411584.012	3130	6029977.008	44223	11466874.831	38608	788389	43190178.137	6684766.53	22455498	289006	49846	6216	65498675	23997	7159	142776843.392	13316	710063	562300	42793718.214	440175321.721	201605232.009	306965	754018	21577079.784	14590106.925	15231	907	368298893.05	85848	238370	24099	27472	65495	46492301.081	19288139.144
Control-150_82	148711	3844	46196	390045	1858602.026	1160	13309	167908	21456769.335	556651	23892022.289	16273	218411395.697	1950	6747377.702	59737	4859462.345	35243	558938	50490371.683	4912089.483	17429779	474961	112989	9059	62080136	19346	7973	134353990.763	11440	452419	378284	55849500.946	799213512.249	164289219.697	191202	681281	17755820.337	16440284.613	13482	896	402394569.018	76072	165620	14089	24411	14854	98080458.286	9063923.672
Control-152_84	178160	1523	35197	251938	977833.158	660	7933	151871	1879756.701	521772	6840876.057	20552	200723301.785	1889	1989978.549	59576	14786335.118	39915	1035370	32005887.758	3163910.791	19619965	456600	49089	4949	53379129	18946	7883	125451122.6	13533	674527	252428	45751471.296	864366068.653	169160400.736	189114	668250	15037598.725	12212274.586	14189	568	291076363.295	70299	192519	7330	26994	15088	94414826.796	21802499.223
Control-153_85	134157	1201	36940	361182	327347.768	828	14606	168277	3854235.457	176448	13601859.382	19905	94952165.29	4416	1654819.925	25050	1054612.487	16772	1001010	37778392.442	3891021.694	21031933	225962	31669	4376	101643072	44003	5166	149339622.668	5230	480865	299629	49992023.002	632718660.675	187535755.997	155563	589947	11633663.121	16637909.269	13099	1076	372939051.099	57561	220404	10213	22702	19600	26113510.068	8017282.342
Control-154_86	230011	1763	45067	202611	731829.158	1301	10522	162577	3940032.216	129675	8921103.629	19374	446711930.359	2896	1802677.302	52613	17233827.439	37286	1412359	56715007	3361524.549	27867689	171906	15102	7001	108769014	25479	7556	196364163.165	26748	461214	216344	29274888.756	669379763.251	280206881.139	382345	729535	16015991.333	9074983.268	13090	958	376024099.234	69385	220821	5748	22219	12178	98432974.705	13649814.078
Control-155_87	324558	2291	30864	175141	1950980.485	879	14428	145723	4861343.773	158754	10095334.668	13438	357344777.206	1592	9233887.982	50029	11433249.327	34251	515549	40430824.085	5880354.141	23037628	186954	32887	8083	83564846	18376	4404	131041294.784	16700	537902	295815	30028482.266	322269320.454	168984105.604	210052	487265	15819528.338	10327617.566	12266	765	311774115.795	39777	279777	14551	23471	37324	69865661.454	10320763.133
Control-156_88	194971	1630	101548	654186	483350.623	1431	11192	194408	3119769.481	208188	11806047.242	18139	82463840.504	3045	3554398.522	59780	8316682.083	33911	678065	62134979.932	3804641.361	23762088	204006	34638	4071	87546096	23557	8338	197137573.781	5410	681495	177665	41874864.32	1167460467.743	231178332.446	232000	680775	12188197.817	11649871.805	12952	723	394663182.856	88674	277185	9817	22405	20583	33239714.185	16848178.116
Control-157_89	149705	571	83768	839782	796267.094	1257	62447	185387	1814573.124	916868	31284355.287	12935	30965072.673	1305	2690991.522	24598	1274811.138	10709	475379	30633070.637	2609830.005	18660477	716029	76765	5132	78297896	22229	6981	90576019.487	3220	378691	154453	61098436.135	1952563424.472	221170505.654	194741	1081776	12376935.144	17564690.465	13576	701	419830708.879	94717	281767	13616	21510	11639	75274898.8	22486230.445
Control-158_90	279464	1849	119520	244464	1268138.596	1211	7966	162736	50582151.728	127647	10153666.423	14775	61434782.26	3034	3777967.804	51484	9492664.558	45894	445206	52905742.755	4637615.315	23001998	189757	28356	4610	79000570	20494	5177	182767669.621	3235	507827	266754	34849826.447	462101045.123	209874310.301	373226	657856	18986158.975	10330985.988	15627	785	382280452.203	126205	258169	9922	23690	25292	34676986.862	9491409.889
Control-159_91	252603	5663	102193	1295398	2324114.122	1334	201101	202876	6909595.111	446676	24562838.668	26500	30124766.961	4316	16188391.264	56688	924394.024	16708	411803	50852096.409	6747604.742	17815089	379824	59666	10323	97257119	84454	6177	182309696.61	1836	801605	563169	72623050.532	916004624.214	275619243.181	177589	782058	13043139.378	23489923.382	12221	1253	361887907.086	79853	214750	8801	20665	11362	97904529.207	42701982.866
Control-160_92	285395	2365	80691	411782	2004995.033	1508	16331	157132	4149585.763	274399	11610352.301	16514	171232594.045	1388	9865907.507	6147	7767696.897	1403	951833	49178267.78	5347507.981	31844144	274935	30729	9075	84801259	31456	3571	176550401.343	11431	738267	304858	38647553.468	411210110.335	177858737.747	72358	655962	17998587.883	12064592.68	13389	902	570315233.557	89559	236219	6912	21088	18572	78526168.598	26312165.746
Control-164_94	78163	2967	16398	277785	1324760.159	1518	13237	150586	2701786.233	136547	7381666.969	10413	190130269.116	5513	4542525.052	34938	1461366.252	31968	378306	29383846.336	4031385.364	11253549	189996	23967	6101	14327208	12327	6507	114773067.31	8578	280834	171065	33475459.894	433651837.869	178547501.52	44559	197005	21536609.137	15115944.208	14597	690	244951058.335	52672	209072	17705	23611	29497	31973118.476	11692194.587
Control-165_95	149221	3175	217353	640494	3027496.1	2280	9740	178939	2135726.921	677970	11490082.594	10427	55612974.606	2086	8809209.622	17207	277564.112	8027	169902	28183278.279	8236706.116	11912633	582667	139697	7167	16986002	27935	4366	98501240.6	2966	685671	430305	70011771.786	877605160.146	232252662.194	58661	477546	10412678.632	13421344.776	12913	624	343690890.773	55381	217802	13108	22988	15611	79174686.405	28615222.585
Control-166_96	217736	1198	47801	510952	938890.032	1304	110615	166726	2643741.128	145749	10852775.685	30324	85246843.022	2940	4741625.698	22136	2672931.301	48754	298264	39350582.084	2457228.4	18821411	211145	41490	7813	73994616	34934	4174	161008487.475	6522	378690	180928	72360407.645	911534512.975	237097341.723	120290	809461	12194772.378	26942734.432	13868	1147	275137177.664	71887	218173	3849	24440	11555	18892447.236	5993638.308
Control-167_97	159824	2618	67846	645119	1092617.785	1125	11423	201680	7717139.769	277133	7837262.999	17011	58521198.085	4612	2684700.002	69536	672330.383	33656	953009	59540119.693	2932005.122	20072694	271837	25683	4564	60487785	19574	6687	170304201.163	3883	261303	226246	35595140.743	592085654.747	224964989.571	212803	563307	11636792.271	8950397.787	13438	646	209025211.238	62885	218426	8454	23930	17441	337473788.677	45392715.357
Control-168_98	164601	2411	155413	546235	1745909.514	5120	31534	168535	1655757.864	751099	16669393.523	19960	34820579.571	2729	9670425.974	54148	246436.678	27118	783954	21580317.564	7682281.187	15676861	627013	103923	5779	25737390	26992	7710	67315809.15	2960	865741	373907	83013401.788	645077637.024	106315934.443	103850	761454	14513522.465	29172629.945	12167	1093	136678331.346	61245	256954	8592	20843	10479	99315199.761	39986994.558
Control-169_99	190081	1791	66731	245948	1269515.749	821	14789	160031	5412181.375	57700	8531201.577	14552	106758664.386	2583	4831845.24	53341	5630123.387	85807	552809	35130655.179	3758098.359	19687588	135177	14771	5082	72572486	17824	5661	108457619.192	5753	357714	227154	33604522.785	388081888.309	206983105.67	214559	1528120	14933560.414	11157258.854	12439	1318	453022795.072	51478	185877	7056	18165	10014	77558382.551	22927379.72
Control-170_100	151703	3689	65609	361441	950165.734	1066	13536	189137	4785468.634	172173	14723538.81	13908	241432130.198	3459	2686622.383	39771	8919947.899	44930	855098	52296261.948	3717372.047	19878368	234493	35982	5811	91175304	21430	6378	187012369.758	15881	391810	235925	36040966.389	984939315.664	228537463.835	296522	504341	16618835.12	13193715.408	11400	838	308005167.389	67646	195798	6640	19781	10111	56309072.269	18286046.705
Control-171_101	280460	2323	38110	135114	1286474.921	1207	15476	160415	4421658.825	73512	8684132.881	19696	140216357.663	4301	2495176.282	83580	846030.899	59345	617671	40068476.073	3889155.126	24717501	159709	22812	9003	71718396	19781	7687	124460847.963	9530	482059	329272	31385349.09	700759446.235	251026447.796	179188	976449	14882635.503	9446887.363	14525	1025	303423123.124	77930	196086	13313	24372	15791	19035703.435	6240348.073
Moderate-173_103	156286	2544	39393	264891	877178.95	1575	9496	162140	3618956.582	128668	11104714.152	9939	158869289.907	11399	2886193.508	50583	654514.176	58982	759807	52058700.17	7038566.254	24506607	185029	17145	9650	65054573	16833	9600	177809192.639	9323	446651	264947	61301698.233	1103374692.987	146966449.003	117087	574643	20967475.897	30992198.217	14372	2082	481347252.004	75829	227660	9185	25633	41501	13126445.675	8015169.376
Moderate-173_104	166306	1960	26735	192936	452237.093	1100	9176	145561	4957352.529	77893	6370560.679	18101	98207648.523	1702	2998000.895	69992	276284.018	77941	739745	38528318.155	7011165.157	23747258	177682	15281	7600	61301796	20894	8574	129009140.038	7411	512600	360384	31191871.468	615343674.626	170053926.316	233937	809204	16085028.528	11767276.679	24492	629	430099759.542	79101	215289	8247	26259	13354	11275208.177	6771991.257
Control-174_105	252072	1769	81090	435196	603397.349	1016	12280	179054	7581492.743	637010	9749973.547	20414	56643967.911	2276	1249891.593	42597	3921039.467	18714	452599	45585540.83	2137049.443	27106912	539073	82992	5647	76543301	24385	8405	156185024.571	5025	425423	197124	65325480.306	988627020.625	232682630.183	136633	733181	12801715.914	16260329.012	14346	518	338404984.807	64513	197174	7111	28355	18827	57831522.653	24340778.31
Moderate-177_109	199869	6906	20278	378673	1943741.568	2312	28970	131161	2108846.172	2352411	9713562.711	16269	363976.53	1936	10031950.176	54893	420042.058	25298	588029	22192694.303	10104277.278	25127847	1726108	262010	9422	45361460	23031	6796	94441553.718	1314	605716	355370	73126789.589	1196232724.815	143763995.959	208306	657943	12074519.226	20949510.711	11510	1507	257680941.913	72044	231184	14043	22426	13125	68847742.732	18610216.176
Control-175_106	150404	3577	84963	372857	NA	1032	86211	167603	9410006.272	815649	10232757.524	18622	45294960.188	4258	3519570.935	38476	1204833.734	26741	615094	37490696.043	3642957.955	22628190	668196	96917	4518	80779417	22881	14603	132496840.902	2557	351626	328326	66433882.751	1317806714.731	225306470.752	283283	1055824	29071128.871	20001836.291	21107	1057	255696347.609	89333	184430	7315	29086	18399	125356541.077	41879590.167
Moderate-177_108	151862	4949	31371	472068	1755347.826	4869	45027	153198	1921116.988	1064054	13677492.79	15998	1683592.79	1519	12970451.842	37738	459569.868	14305	736585	32625720.54	9077183.126	25751066	835265	131334	6472	55885966	22177	5573	135727832.409	2644	433068	252677	31380577.464	613468591.486	162253564.215	319110	616301	12327977.051	8451641.502	16450	728	319614672.27	86596	210512	3913	22786	10217	64847471.379	20648584.818
Control-176_107	167858	2314	50948	169925	1577238.965	818	7457	142043	6754298.579	106622	7752800.731	9854	259121958.857	3171	18507530.554	52489	9154690.343	54568	423109	53900188.539	3561180.223	21250769	162669	25006	6026	42595330	15036	6701	209432724.39	12616	458478	281672	37256009.555	343120539.365	213918280.452	87704	322245	21085755.475	16232513.242	15561	1036	325504194.938	90049	192896	3800	26819	13921	27238238.749	10519537.324
Moderate-177_110	286892	10310	39923	647808	NA	2126	30949	174072	91640554.128	183730	19222971.132	19978	289718247.182	3884	5693231.382	68114	2805358.335	45169	853460	37514081.52	5578023.336	25384750	709746	24418	8235	57836774	29955	9096	139345997.78	16343	814291	528197	267962790.212	368826518.833	144428577.098	245357	808560	22748405.254	68662582.832	12701	1065	236445345.54	69591	242912	7858	27663	16016	22643530.32	9098333.636
Control-178_111	314949	3939	104126	358189	2098384.342	1326	11716	189715	2511040.555	1089982	11276668.739	14815	100352663.291	1130	3342854.093	23605	23102876.321	16072	675485	41568290.353	5158471.744	29087996	925933	144693	7992	56536059	21326	4472	131236449.442	9087	991447	542293	69958582.364	809280046.776	190800152.315	329705	1247807	13944944.135	15345567.727	14127	568	275904676.997	117410	222103	7249	30255	17139	58830332.844	14911373.863
Control-179_112	183268	1853	37275	242753	746558.92	1264	12048	183164	1232021.336	105884	9016178.728	13200	19677376.734	2018	4430120.698	53529	546058.678	55818	851163	59744766.008	5339665.772	17935108	160469	22019	6125	58499427	22923	7141	142063937.009	1124	532967	262667	24403083.6	556487274.494	222044438.651	171213	1273463	16570949.899	7099780.088	11692	540	304884248.609	93278	195857	6258	22833	13669	36764116.792	14613268.427
Control-180_113	253391	1384	54663	480382	977782.041	1001	13725	207524	3523298.3	221283	12746764.765	17193	151147649.312	1696	2349142.89	49104	5081625.861	30029	1749661	47158366.882	3594072.46	24878275	261933	30720	5681	79017347	23091	5181	138866914.541	9112	318111	183197	61419624.641	1023488326.547	212167290.472	346612	550124	12796174.645	12199806.219	11049	441	323732803.107	47010	204085	10415	27979	20704	202712522.518	40040609.646
Control-182_114	212396	1150	46546	328180	841200.775	1191	10108	186369	7624130.447	396779	8153387.085	17231	85790725.496	2594	4806551.195	52672	7758110.681	32874	619253	37567812.15	2749261.007	25796845	371395	37165	4570	57815974	22549	5761	134947802.365	6476	373745	186464	62940713.887	837130165.866	207019243.503	287516	482360	15198934.178	22769498.028	12364	717	302083074.242	86295	196050	8572	27326	16677	65226807.53	22325778.29
Control-184_115	248558	2472	95146	336523	676717.15	1329	10374	180236	5280043.253	581090	8831336.615	23939	70898560.041	3098	3058777.809	42387	7089056.199	16041	551906	32580137.761	4231840.737	22959896	502259	48977	6988	60665486	22523	4176	124682306.434	5837	401238	188332	39570964.246	940404576.931	145650080.241	107645	783491	14856571.369	8757158.907	13150	716	249945133.809	104772	252526	9498	27405	17821	102218490.037	19771598.018
Control-185_116	307175	2307	49439	219511	1229572.633	686	12340	168300	3249922.755	149213	10284304.31	16869	343731188.802	1831	4539280.05	73553	11805289.576	59143	710960	47059716.061	2414184.931	26478355	180201	12581	8959	74444255	20125	7468	161283399.077	25980	467303	252196	26463171.026	367504591.491	259863615.458	246544	777719	12972595.449	8775499.578	12514	481	313694826.695	76825	217922	8757	28087	16967	200660897.378	60352875.299
Control-187_117	87580	1410	48517	226755	1032942.247	1228	5555	181940	7316751.298	111718	11206894.65	7255	216506959.859	4188	2836195.292	98743	21629827.444	45743	108705	48594395.32	2512521.284	6050852	178596	24066	3050	6785720	7090	6937	164273545.462	5762	123169	93099	23155661.636	328346757.149	278083432.873	40133	184055	21205655.545	7380108.068	10243	627	371577672.63	83312	217992	5699	24392	11893	64328169.97	19077946.137
Control-188_118	217737	1967	63634	228465	1333467.414	1363	9773	176233	6812139.473	96715	10147629.663	14329	133696613.193	4978	2374779.497	86746	10618280.205	80076	997411	42181024.366	3113348.076	20881252	193387	26240	4739	71258636	21083	6466	121165710.468	9016	502563	277971	21430664.084	395287472.315	229925102.273	380479	939677	15190458.728	6636042.955	10018	1081	285142227.518	89750	185304	6585	23437	9608	13406799.355	6866530.95
Control-189_119	213659	1328	42796	526188	825062.123	1494	28841	183771	15136071.546	567457	9678954.04	18006	79060115.315	4318	1573610.582	34170	30409092.107	26110	890086	32757913.041	2851122.153	18471906	570649	61559	4353	66808980	21407	6471	121584712.935	15461	353759	222266	68452153.43	794148065.51	186016336.369	433811	526425	13536496.799	15533941.474	10718	635	342527936.15	77661	206599	18082	29110	35421	340956592.883	59630685.24
Control-190_120	340189	2763	111967	299489	932500.433	2131	12450	181812	9928965.809	253884	12277330.432	18199	314907792.806	7906	11060364.128	83680	15949934.26	52267	418261	41187400.362	3421422.538	22196257	294706	41631	8759	88980481	20634	4983	120901933.639	15920	558853	255700	32002077.346	451425871.203	160539668.659	181444	724611	13053550.399	8876913.961	12478	943	298543888.393	102014	253568	25930	37451	97233	59323276.5	10538725.757
Control-192_121	184536	2635	46129	345648	728516.585	1903	8273	191782	4353752.718	113671	11264977.291	18294	180006483.227	9952	2660593.584	59449	1564402.762	42832	382209	40328883.031	3355014.06	18112974	168810	23077	5029	44810138	20246	5602	139172993.962	7052	325009	178250	68063931.653	1249813387.567	224715348.725	166121	494105	14896688.062	20322737.769	11700	533	361687742.632	79558	206001	10859	26413	21868	86154929.27	19537243.018
Control-194_123	278526	2196	26412	340531	931670.073	788	9386	148813	1213534.47	521595	6143281.992	20664	178606472.002	2088	8909883.014	58571	303814.298	45406	403122	62492470.913	3979159.972	19470684	459594	115713	4829	53538587	20438	6106	230534420.768	3914	444431	331561	44717170.584	809316818.42	193550075.126	195309	977086	14012639.722	17673855.54	12110	660	271167898.17	68239	231995	125722	29087	420238	29113005.845	9800814.063
Mild-195_124	316620	1994	66359	198393	1758923	940	15586	133596	3151410.742	371000	5243518.586	23676	36867534.793	870	3715577.102	31824	2486668.193	25169	393875	32823569.9	4073413.747	27774742	347770	58113	5177	53315414	25422	5142	134665534.339	8986	399188	172336	38518768.016	648264486.36	289125870.312	185383	1042959	12053613.862	11583469.108	11181	796	416147618.875	56435	214840	10761	26817	17155	76247763.857	28864068.535
Severe-197_125	252543	1598	35853	548949	460069.932	1779	17569	179571	1881776.333	195561	9199167.987	20155	145797631.621	11686	4523912.131	40845	6490870.697	19778	517981	35444575.43	7447504.255	24691754	221664	24846	7063	53749580	26475	4187	135679774.737	6979	648128	369939	36090254.656	669794588.077	137994001.783	209182	796712	12424041.477	10474924.694	12870	1286	279888953.394	115557	208488	8648	29907	18631	61055928.432	14821607.084
Moderate-201_128	319492	7157	40475	539514	2734997.384	1681	12945	165439	1637075.5	560044	11672781.887	16651	339478053.237	3091	8440796.449	43507	5958368.225	25868	550200	37481374.789	8326332.784	22764442	488360	78653	6661	52554756	21100	7265	150324873.924	17297	746243	480476	55320863.359	918916882.385	168289189.508	172450	908135	16468543.244	15926401.627	12394	869	292504338.309	67202	223314	9019	29552	18866	72591874.365	8054953.032
Control-198_126	219502	2195	289232	732848	1825319.762	2185	34913	168057	1740058.865	1542792	9848946.906	20058	89762759.825	3678	11911252.076	31737	2145189.932	52845	399801	29983309.527	3830812.843	16392644	1185249	212584	8621	63768241	21687	3412	123311406.172	9618	767510	375499	91228389.158	1236840282.199	217940808.294	132816	530885	11815153.163	19734704.783	12501	809	330257818.929	81100	216765	8592	28748	18485	158772727.858	53149197.089
Moderate-201_129	271697	4904	38459	230870	1445147.636	1888	12919	144939	NA	256126	1779206.246	20381	72383582.435	3732	309493.137	45190	1195596.812	16755	991527	5485351.936	747500.508	26873992	269501	36128	10117	57649131	25436	3984	27336999.614	6878	656193	250436	20891506.616	166510312.656	44583827.671	180526	1667671	9808378.526	6917532.924	12842	953	82779180.361	72293	230843	11273	25348	20003	11457325.39	4015124.739
Mild-203_130	260131	3003	94442	630750	897629.088	1707	53538	168428	525087.716	960094	1538891.034	23645	15064200.67	10782	151401.22	39821	2696948.726	32050	1953631	10979995.767	1537498.266	22353259	781020	62082	5980	96501767	23443	6525	51949026.206	7493	530449	267517	23305273.225	225029981.026	113058839.663	255203	642493	9466409.715	5336569.191	13434	2953	102148596.38	88287	213257	15950	26540	19987	46498072.395	12168834.391
Control-204_131	253898	1287	102922	350913	994135.667	2840	9039	183352	3287561.962	108284	46744212.307	19091	136965216.013	7101	2286377.261	57005	1672407.111	25700	445363	47875423.854	4981619.877	24068506	180650	16859	4792	33976440	20628	9523	128916229.691	7454	307366	236827	25715817.196	540795030.484	262357321.258	187473	676569	20385238.373	8541663.219	10172	751	339384293.67	61070	208108	8056	22213	11603	30418388.243	17454448.724
Control-205_132	243352	2629	50114	418206	1096266.436	1425	12240	176630	3922373.294	855382	8964861.257	17087	139768368.581	7833	3147895.831	63388	2891544.259	71422	1602974	42454470.287	4786266.985	22738510	722971	126616	5486	69909244	18783	5504	144778252.44	1884	424692	226849	54419720.835	925454991.385	201107113.348	170289	582149	16340414.054	12450607.682	13163	932	193287269.531	131723	195567	21507	38482	48033	326383536.427	39690213.27
Control-206_133	223104	2045	140659	264021	NA	1813	12713	165908	349366971.119	116201	10200372.916	13645	22218379.137	15113	2768177.584	34061	1486589.196	23253	1869764	48114987.089	3959063.958	22743607	211292	25419	4363	54282357	19084	3984	126491222.947	8322	655289	411721	49480248.963	933323699.975	228540891.661	205223	524179	17486440.194	20994745.757	11824	1561	301304463.907	93496	212032	15469	27290	42619	48180493.575	11866364.351
Control-208_135	253207	1340	68070	504148	1585207.508	1620	12424	182009	5184858.799	84559	20540631.559	14263	308141266.581	16068	11609934.728	51548	1042380.275	40002	476622	35451445.16	4337460.84	22243597	151318	17802	5319	72521469	21337	5774	129914525.013	6540	413283	197927	61996749.438	1246558502.865	322473866.701	240657	548846	14759307.13	19731863.7	10955	879	528781894.795	46836	209429	9031	28622	18609	94201259.234	26340575.188
Control-209_136	278910	3128	72313	331306	1056840.482	955	8965	187924	1353921.115	158262	3373395.554	16089	55189707.539	21887	1849532.839	54944	2394388.738	60055	657816	28947729.341	2391002.892	24821785	212566	14264	5487	63237597	20074	5656	97502796.582	9806	377293	191019	22284821.532	538242776.55	172873491.699	260977	1632750	10580127.071	5942113.605	11657	1038	230547626.371	68088	203153	11316	26200	15450	50262168.681	12957962.164
Control-210_137	230752	1753	59836	159978	1565587.85	1751	10449	144363	3269463.22	89411	10646548.776	15616	145162145.329	10899	3913577.003	55494	19455867.633	57489	804232	36075060.473	3640190.564	22692630	170992	22788	3906	65032170	24460	5754	117534135.848	7270	1172971	291424	28580388.994	478096360.175	195405847.35	193416	417023	16777413.776	9115374.291	11881	2347	338177133.263	75817	180116	20892	31101	37270	45453118.388	7549385.617
Control-211_138	303000	3733	73946	308082	NA	2238	9417	160385	9794334868.804	828268	12369657.954	14696	211010377.981	39959	3217595	70914	2797970.226	41488	340265	36048595.115	2757906.071	21459892	682899	167763	6372	54107563	20793	6209	101168429.039	11209	658157	405075	69208807.803	1034725732.824	136472239.042	260420	916516	13588350.933	22077779.243	12066	917	276157868.516	76034	196695	42493	29425	51705	110216458.174	11204683.399
Control-212_139	302938	2204	121948	423371	930567.397	2486	11921	180790	5867704.007	167388	12287345.639	15665	357518894.812	21835	4769675.553	24684	4706603.691	21027	830994	81727149.807	3891771.037	22201844	195841	38024	7145	50588236	18117	4731	308327534.086	13622	388200	211374	39747932.549	893456582.779	204066497.717	155619	880783	15054225.109	12422747.782	12597	955	367916331.815	86746	203905	9548	24417	15728	113715875.756	33852046.263
Control-213_140	65359	3900	73065	433168	781842.499	1136	11440	158757	2611540.692	502636	13482018.468	8739	2474940.083	2211	26645898.604	12482	277952.959	7937	175583	26897095.724	3459448.584	14036728	461053	58063	4923	19218691	12644	4921	90702678.584	1252	473442	238239	46246573.611	2173056106.209	191166270.187	30412	474611	12747944.233	10918916.424	10296	922	328371583.337	63761	189352	12602	25517	26570	337937251.199	66191934.959
Control-214_141	304154	1733	47114	294348	951188.153	1354	11503	173722	3469695.266	456569	10854886.886	17448	160191333.552	11966	3389948.961	36763	5352652.269	33144	862186	38901322.209	4135896.055	26154639	453509	63944	5206	56419332	21806	5866	130823646.817	8224	477791	288686	65840865.464	1002698550.307	158671587.789	199096	941125	12373049.903	29333260.932	11777	941	357103469.57	100416	208513	9316	23783	16223	74180664.882	18361454.348
Control-215_142	322859	3339	66837	477372	1517791.838	1494	18523	162792	2543492.174	182653	12173252.563	17972	72142845.643	2533	4196555.157	49229	3390041.936	26441	497672	39286598.611	2272331.442	20528047	208411	35677	5432	69242557	21345	5009	138556521.219	5581	568845	287002	60286832.688	753968014.904	271906676.439	248590	1800725	17018428.382	23388731.308	13139	1120	261985466.052	88909	205520	13187	26132	15425	80656395.656	17884656.869
Moderate-462_187	243585	2604	48441	493700	NA	1982	12964	154575	3658960.479	160403	14287303.285	26054	387663716.311	7053	4006955.634	146380	858940.366	69034	1241241	55258627.265	5553619.114	25623250	204722	18512	11230	94512419	26320	9022	197485411.99	26216	984217	378262	55103685.924	553420858.226	161235105.108	251097	480850	18566779.637	39070335.896	14618	1891	350557201.105	67478	329059	17494	28174	19001	42334377.594	16863674.422
Control-216_143	257442	1603	94300	584347	1067161.658	923	7009	171855	2263889.771	769595	20684170.063	19792	119853093.817	18969	2469596.52	70507	6212543.926	47785	526155	37153648.439	3446184.315	26059154	616981	83693	5275	48181987	23450	7605	139916426.759	8576	415447	185961	35419623.853	1228549043.318	207941728.974	210022	943545	22398245.547	9957621.336	14596	580	375525523.621	115784	188887	10085	25709	24672	104942079.215	20190203.007
Control-217_144	261113	1545	51632	482775	983383.72	679	8529	174143	4294591.51	439533	6004008.577	16746	96307863.484	3565	3521420.983	63544	3728691.055	34902	289096	38101904.982	3429095.963	19233658	397871	61616	4665	45598726	21790	6578	118898385.348	5299	507153	214273	44540140.674	632662006.571	180155623.263	159746	746185	12686539.674	13375362.406	13076	881	354257945.86	73217	239294	17231	27840	29830	73306106.308	12318432.949
Moderate-258_168	363503	1780	53945	671915	1073990.442	4296	55126	170629	1454984.509	245397	12398423.272	28574	246388.218	13177	6032284.413	52987	470442.664	17525	335226	44087200.655	8187282.574	25326758	269277	26935	6287	44984758	19767	5408	164953753.891	1661	396069	215436	70032265.648	1330299477.775	154492026.489	124230	1332889	14850196.532	17915430.833	14989	1749	328549788.128	146510	252238	34735	31846	59495	23928396.434	12469414.094
Control-219_145	261043	2245	99008	356187	1256033.997	2521	14855	175947	2567009.222	142806	13671638.565	21181	247723111.039	2612	5769653.058	20227	7829021.742	16456	993323	31046491.137	5725399.857	20112840	201088	25374	5798	62226180	23528	3970	103931049.366	12661	595232	301348	89033576.206	446827586.188	191546137.517	127880	1292589	11575276.832	20022813.308	14433	682	320614283.524	81809	190714	14066	31976	24491	178758362.907	33123426.784
Severe-467_190	426166	1357	24737	308023	500009.236	1191	10489	159315	7655736.221	309352	8983042.759	20854	259152200.638	19860	2587949.959	114803	1014239.232	77710	2424778	55595767.939	4722137.342	27103764	342011	43267	7530	66016970	22621	8982	168944112.144	17796	438741	251993	50589753.019	653768930.308	317445150.033	440003	866932	12968102.515	45187794.089	20275	3617	278666731.663	76244	263223	18553	31661	35729	11672637.526	6698190.43
Control-220_146	339803	3683	143688	496711	1140446.118	1129	7532	169924	1670339.323	505880	4665232.439	22281	81340810.48	5874	2122399.484	36408	653018.304	16691	1155793	24409988.562	2114883.954	25743200	455456	52259	6965	71685163	23619	4673	84822268.423	7829	384425	285525	25835188.459	546114666.551	133875360.013	143151	649323	7167922.257	6666061.943	12957	443	135208936.503	87797	212892	8333	26474	20170	49433167.799	14986855.329
Control-221_147	474239	4487	67430	820165	2617919.103	3282	20733	172266	1438402.587	555291	14940030.736	15765	210154004.638	4184	12214612.392	21985	5870834.532	9816	839361	35933681.478	7289319.488	21450913	486547	78882	10430	52839772	23201	6304	138675698.128	13472	1195145	428104	54314681.117	997272799.435	183359602.793	143671	1995106	14601997.211	12469095.784	11102	682	304924063.923	87876	230912	9575	28176	17799	45974405.224	17680388.478
Severe-272_170	274685	2485	50322	358742	712230.297	2961	29187	175461	107067338.916	216188	14949773.706	21084	71334782.315	14282	2869637.209	144571	755324.369	77158	2532682	46836474.54	4011341.59	27020320	278498	34604	8100	100022732	27521	9302	152702094.606	4824	590474	321619	38632921.775	471443671.128	211825220.019	367518	644608	19023616.715	15370690.321	13864	3590	344172446.276	110246	185783	9472	36188	19304	26194890.879	11621336.876
Control-222_148	220005	3396	112879	653428	1031973.553	1582	15525	198579	3979228.726	2647041	10359590.669	18943	165351045.255	4001	11643508.068	27829	2359810.184	11098	315179	36895936.859	4049788.587	22569645	1923959	246604	6172	51585222	23839	5917	108704150.211	10474	562155	254242	58332078.802	1052752428.999	217198318.095	169295	1588355	12645810.591	11771106.074	12546	1345	217077512.188	109977	199283	10048	30309	21049	113337581.356	30328986.652
Severe-272_171	311454	2209	49241	284866	778559.386	3071	14980	173344	128208424.545	203521	9330956.62	20835	250908510.3	20377	3019380.13	127284	337636.395	56734	869372	51090601.662	3459776.43	24916594	271636	40176	7344	69480712	29189	8914	150446348.309	14289	430542	336977	41977807.72	488783429.88	171377955.904	253864	793898	17327182.231	13854015.403	13098	2102	337478473.995	109790	286040	15879	34507	45424	23015172.347	5948910.595
Control-223_149	269376	2071	289084	1078795	1281890.461	2582	14352	205446	1461240.787	2037389	10545437.645	20800	57477473.138	7128	5722201.021	18379	7838552.69	12416	877249	36148650.001	3587934.836	22226062	1503006	278014	5083	47032074	29426	4967	145030008.984	4673	707811	268636	46615898.748	1373418313.707	210628166.155	142152	947351	11443300.263	11272725.092	46999	953	394239540.052	90863	206300	18955	30591	41963	104015303.932	55805010.384
Control-224_150	339742	4414	50305	136213	1822414.588	20049	10768	155670	2365224.883	87829	41509272.042	15694	395424960.189	4327	6780706.379	44930	37670192.964	89906	877385	44259151.83	6996965.812	23597812	107110	22381	6228	72513950	19371	4054	133302800.122	22723	681495	433786	39296802.035	276880091.366	178229826.742	214122	493978	12199291.166	10716115.259	36190	1127	314623244.239	63835	215311	11341	31217	34406	48263678.675	15037821.977
Severe-272_173	357750	2180	66098	678636	989647.282	2223	8242	192342	127526317.904	570851	8443418.507	27662	77443246.788	23637	3282031.119	149785	5038397.441	51703	1172844	54315615.722	4276204.864	25735600	547200	83298	7838	43702809	27811	8510	184697448.755	5684	442954	260265	66600971.279	988038095.91	215748882.621	123584	968618	18415213.034	19551497.048	24846	932	453537451.291	82399	279706	12770	39718	28485	82116921.026	18009472.832
Control-225_151	216720	1411	42128	210539	409360.543	1180	10876	159566	1603921.022	196088	5046148.46	14060	114016015.046	4150	2029774.5	93539	9100941.013	79920	780088	22049589.603	2455267.673	24499848	216593	15818	5800	51932117	17822	7860	75285071.885	12234	477444	209639	40392564.356	634475015.964	180904365.972	234690	548865	8897420.637	9518483.038	42094	1573	148877190.015	84998	207592	13308	29083	36361	56319132.014	11428406.661
Severe-427_183	395953	1841	58348	382925	856114.026	1170	18460	154278	4262675.173	150391	7960035.783	19295	176430116.842	9508	1994610.16	100655	637582.087	45696	2967092	68648427.107	4002532.404	24536840	217115	25015	5843	75622048	23494	5745	276656710.338	14363	441225	292165	32312631.477	402955370.381	297006341.74	303576	1219069	16357242.18	11975091.361	17579	3485	282867103.402	65061	251871	14550	28418	41531	20298152.585	10856142.924
Control-226_152	281262	1446	103389	444459	839787.766	914	11331	190568	2081106.404	226232	6876980.768	23853	173106545.286	8096	2793554.413	74698	3872949.912	74585	1258291	75356906.184	2920145.559	30901364	193988	30670	8248	87079802	23440	8716	286478212.291	12904	451289	265656	47514627.677	619015497.5	292819578.463	328704	882983	10069839.913	17428211.226	29788	1023	385168577.931	94966	222577	14768	31081	20316	32942256.285	3931669.861
Moderate-305_175	249563	3889	47287	381511	1756804.691	1677	11398	171060	3547397.721	155504	14022564.749	28712	283354929.427	13097	4633965.454	68606	664673.602	23205	2859279	40624045.872	6083101.245	29700393	197460	18746	6490	104403225	25406	6326	144858236.003	12518	653381	381806	33385353.061	468368173.116	170918161.992	142805	961505	21998499.796	12422255.275	16322	743	209920366.658	110185	273724	8908	35389	11231	79555191.137	22412210.915
Control-227_153	393491	1873	55503	545396	294062.241	1415	17687	194027	2224661.044	208629	11513700.3	20840	162979372.955	18009	1553137.266	33203	5620378.013	15049	851227	61377178.626	3753981.245	35186946	224900	40770	6321	80985951	23397	6553	235644527.19	11888	395820	203622	208043435.221	537803827.4	195107471.362	266038	804813	12413336.881	77918004.072	29052	1292	258071773.203	67033	196560	22578	36155	21717	20710716.336	4887036.059
Moderate-258_169	398746	1490	39138	438357	822497.483	1672	65140	177750	2048538.911	156635	9778949.581	18280	637425.08	5769	3581929.68	106589	352879.019	48002	604868	46737625.992	4041266.659	23353539	213396	21008	9105	69409648	23951	6232	119400928.942	2106	385038	229724	48622479.548	577787832.613	211340589.009	138028	767085	12644123.844	12995923.924	12092	1163	266042328.088	80142	242843	21364	32416	84184	7826300.277	2972102.148
Control-228_154	213169	1480	103822	708216	1120899.313	1794	10752	190322	1387646.835	804914	9015496.04	20980	41250719.522	5694	5539865.261	19641	503980.615	16074	388893	36168362.988	3203466.677	25138039	637548	100121	6171	68118954	23465	4617	119547053.046	3588	549143	272527	76101419.125	351122802.879	191798134.363	74913	1185580	13892849.256	18702119.079	29763	1013	269257554.885	97167	165508	20623	33745	15745	54450514.966	6993057.355
Severe-476_197	266472	3584	159352	746094	1147958.687	2091	134103	192826	2122778.217	228914	10416761.242	20593	224687459.727	11276	6239167.837	150899	1626459.481	42797	980969	39028602.6	4605174.444	20998958	233429	34672	9697	65302410	27612	6168	130611483.147	17396	396516	295724	52534491.777	129437578.311	246641746.5	266200	1395701	10761292.204	18380230.051	24343	890	197173775.297	94633	254458	13214	30837	13470	27922222.311	2336013.093
Severe-395_178	150089	1193	48793	231620	1215073.465	27420	11086	162262	2393216.666	138909	49472723.397	21766	106841685.964	12188	3811826.566	136954	412296.515	55568	891436	34564918.037	3934571.952	19680188	194656	19289	7380	83711497	22806	8436	120399924.526	6751	569077	273047	26374256.118	344468218.586	158911047.418	369160	576866	15184235.391	8068866.01	13362	1000	257588569.765	99312	262351	12064	26314	5576	6398333.651	10537858.673
Control-229_155	239576	713	71276	285615	636278.799	828	9702	178185	3205436.632	104586	10503103.789	18248	385624416.761	9278	2879945.495	44195	750036.289	54040	615070	34220816.992	2148976.873	23972900	162978	32848	6024	60230335	26291	5015	135296812.845	24113	994565	255780	31801067.187	235991538.878	182565341.098	117361	812040	11728407.657	8832297.135	24886	1148	299350189.333	48600	198187	8402	30655	9914	4800321.125	782449.635
Mild-480_201	272845	2428	356098	929192	968828.491	2011	110696	221174	3712006.186	1426740	10114190.258	20847	81875817.907	16625	5097433.736	103317	1101095.738	53221	742062	53252685.085	3775883.253	21575319	1101049	174195	9184	67254665	20379	7006	154697575.795	6700	477583	207719	48552261.437	37275343.792	202434846.355	352481	986877	10028057.75	1815561.247	17021	924	350685441.898	100793	225363	9590	37892	13088	953513035.75	269150293.977
Severe-471_193	267105	2138	50392	400592	673185.552	1190	22154	195716	3044636.191	792773	7509443.11	17339	106297365.838	7216	2113881.159	52258	839920.52	35769	1238906	47518345.169	3429235.88	26185036	656875	54396	6722	87696268	22609	6422	161069616.417	8559	543586	298330	48371997.512	103944255.532	190756738.066	310152	1233841	9707825.988	2723145.323	19988	3328	284653621.658	96721	222032	12230	26576	14763	49996349.914	16028725.511
Control-230_156	431066	2312	55752	268058	1214095.329	1220	9721	170971	1473409.356	123931	8078221.838	13798	419409563.078	10892	3987010.377	31982	3269022.212	27970	1306515	46191306.062	4113956.925	24192363	137850	19669	8341	76372124	20055	6150	148980173.254	26905	603934	277128	32725586.194	10292350.929	237870220.329	366440	1692545	13829446.131	888010.092	29895	807	305972819.501	55813	224122	12356	29578	14741	43684603.253	4680026.355
Moderate-305_176	179057	3312	66268	209598	1493780.456	1787	27368	176957	2650719.865	177015	11892885.533	18074	418517723.229	11671	3342288.078	97725	10925729.87	43889	2354417	44735462.532	4621545.334	31118227	230402	26383	7723	139198008	21128	6013	136760379.961	19720	597191	365427	26462185.89	70407095.729	151139502.679	634843	1166200	18801649.494	3283640.402	16000	1654	250448009.284	51603	218526	13719	28452	20435	96263585.701	18423629.794
Moderate-481_202	406964	3051	13434	367291	2334552.096	1944	13109	159508	2296516.417	60713	5616607.587	20462	87589086.69	7215	5427094.017	98686	725922.27	102516	678930	33449780.613	6224085.542	23616855	133603	17562	14151	67033356	20142	10839	85891546.965	13110	749681	367455	20880338.953	667833.464	235009112.185	195579	1522655	9684666.962	145113.713	23237	726	158930067.709	89235	262971	12996	31545	22998	13456381.915	10672482.394
Control-231_157	183430	1696	34594	161172	811880.662	1924	14806	143155	2978673.947	61185	7004434.483	12967	46331878.832	13100	1553614.335	36557	6655929.688	57487	570231	27552667.867	6947654.937	18570210	119596	9876	5769	51079212	16394	2769	101279128.869	5962	471579	231943	29585000.575	93202446.748	151302738.009	149762	920672	9756133.643	8623556.403	29423	1665	272288554.681	111678	196255	11694	33043	14638	8057238.195	2726803.712
Severe-425_182	322784	1985	41658	170795	986312.315	2363	13448	125223	6337928.168	138948	10094398.243	21621	152218109.334	25483	2851557.452	92351	10969482.584	69208	1236621	37905252.23	3561366.082	27432582	206866	27468	6258	69749858	22857	5947	150846542.084	13920	566074	286396	40364637.279	79196027.377	170579090.164	359265	1116943	19069621.349	2561961.036	23698	4965	184217501.874	159548	244187	16752	34137	29577	7994053.515	7105441.24
Mild-475_196	70795	1497	60761	463922	617184.192	1418	7282	161117	2146517.16	184083	5041228.596	6040	128675187.487	5118	2672036.598	88831	685632.749	30789	77560	44111960.172	3420039.686	7042868	227247	19887	4424	4828082	5630	4315	154444993.039	4584	131010	30191	16536720.533	157263288.095	189583786.261	29891	304106	7821586.098	393117.807	20884	1712	282131459.041	113427	228666	9069	21398	10473	12773418.644	6609562.466
Control-233_158	337911	2489	75751	435995	845620.316	1451	16010	150824	2038970.639	165061	7359798.861	17795	182019944.531	14084	2637842.311	89933	5972976.861	88326	1145813	69289240.462	4727267.182	29192973	194884	47908	7581	81953797	20642	7418	271983054.451	16257	646225	272076	28188676.281	172438083.722	253725822.36	489640	1364207	13442486.507	5743403.014	28389	1738	384638720.144	98753	179057	9370	32530	11156	22991384.962	2362968.258
Moderate-466_189	152327	766	169112	662657	827205.556	3135	73490	193455	1299241.919	332311	14586122.236	21096	59489519.468	4556	5563832.657	67771	2425845.726	27985	412956	27508842.351	6406134.777	14168395	332718	50776	8210	44944662	26303	7089	117372976.353	5868	571107	248243	26307572.048	96758586.744	161021462.058	128626	1405655	14335929.689	1212676.322	19156	1474	268403443.452	92954	259751	11828	28334	7637	74804097.7	12726710.831
Moderate-479_200	255411	2712	91300	383251	2406792.986	1473	14357	166809	3048257.614	73889	6651002.446	17959	186069.407	3567	1258106.857	110944	461724.9	61085	918359	37561957.606	4119872.206	26455002	141659	15682	8307	65491977	19356	7392	121726528.156	1103	711144	331486	26932280.04	1873830.976	143298666.58	458775	1467179	10076224.534	284446.566	21457	1560	121710131.009	73084	291510	7767	26472	12373	5721168.618	7016578.746
Control-234_159	235966	2688	128570	250205	1299454.606	2128	14265	175232	1781653.203	123271	7663176.246	19007	133463848.263	11778	1258678.223	26943	4110795.598	24329	1858219	38098665.683	2217498.735	28661155	170161	27903	5884	80423639	20325	6687	121163476.829	8902	513469	209915	26154080.245	46979846.891	209160643.12	331483	913755	12685523.694	2994624.47	28573	1734	153274660.766	113525	210276	10405	34385	13175	NA	4453004.276
Moderate-469_191	144155	1974	181133	1011033	466501.123	1835	14066	182272	1211456.929	1232804	8820080.562	22304	105538868.083	8657	504115.518	128160	425742.008	81511	786038	28543567.666	2966670.844	25059145	965688	203928	9791	50457169	20522	7721	109715456.42	8365	702251	285674	60692603.448	16502857.716	217869595.409	260247	2218602	9832831.297	9806083.117	17637	3009	57931913.937	79316	284567	9519	24734	6270	4453361.838	2148109.08
Mild-465_188	210243	2161	36125	330415	1363043.201	1047	9171	162761	2346771.597	1428867	8757709.058	24214	153748021.802	2185	193163.278	82656	8463950.279	50875	1332376	23880430.783	1716206.657	26962117	1118555	114123	6771	49173295	23092	8945	96084588.968	11303	921253	964213	79887665.019	17857243.899	54059709.018	255268	824095	9660561.796	1189659.874	16348	1468	95651945.552	52779	219180	21374	27603	16660	14677430.245	5105000.214
Severe-423_181	298064	5206	30079	534601	1291311.739	1870	8228	171165	NA	1997999	1517892.732	33766	48345143.733	5279	181398.803	143364	1965517.595	57943	812935	6959159.563	777650.033	29725492	1504830	194851	9142	51416119	25176	8050	37513499.95	17112	716397	574827	23620373.096	36634750.832	48549570.935	130129	860587	6842763.466	4505079.543	17491	2600	61962870.841	82174	306548	11954	28524	7036	11486567.699	2587986.672
Control-236_160	210227	2567	52015	353668	699648.165	1764	32029	170638	4108822.234	122055	8038657.916	28746	318275216.163	22858	2026746.589	57673	4894155.347	97423	883598	43633859.026	1338110.583	20442378	147795	29223	7041	68826550	22845	6135	124198918.445	23011	988585	323077	31751802.678	122262649.394	98915003.652	263634	704506	17324578.288	4408402.55	21952	787	98560688.384	81755	150503	12609	32856	46752	302631.842	3031371.291
Mild-252_167	256023	4503	45343	233843	1090384.325	1906	14145	164692	447802.528	104594	1694973.12	27053	29390835.412	19613	142532.17	115380	2107840.822	72300	4113491	16865313.007	952336.023	29507374	194508	20876	9411	89285520	21764	6969	71758133.331	11439	851544	504619	16409830.543	9794893.493	29283353.481	343309	820345	8169389.559	1528660.082	14533	1957	65302258.568	87651	233639	10050	37591	10646	6483330.789	2354178.42
Moderate-477_198	320070	1385	78084	533595	1396075.492	1311	12328	174070	3165389.608	225464	5826786.927	23703	89567773.521	4881	794941.942	117569	4526118.921	57233	827695	47909953.529	2143561.95	28024411	274771	45982	7096	82434882	19892	6876	150774522.207	10698	495385	218915	36016153.743	36266766.385	109179957.226	493684	1515863	7178881.921	4748138.452	24022	2202	33181478.316	133162	248705	8298	27634	5245	3379649.467	1103142.174
Control-237_161	320392	2213	83394	396511	1439811.044	1235	14195	185758	2742497.103	240133	7701855.508	20702	178494530.591	8205	1736583.006	125196	3094354.91	66514	940821	44613514.088	3736496.142	22687533	225809	24460	6466	63360834	21196	10120	151412841.461	14664	819752	770739	62777471.22	233395834.085	209449125.512	236912	868652	15174426.802	12811550.191	20812	932	120518389.784	91418	220764	7679	28779	17985	864380.883	1176216.908
Moderate-305_177	287759	1829	107926	410543	1576349.249	1899	14338	196947	3329748.112	207105	12972948.716	23569	387965167.031	10287	3827912.311	63782	6277917.026	20134	1407607	56873035.494	6939778.032	28872011	224965	22454	7602	127151760	28161	5331	183558943.125	19546	732408	354221	81323033.113	128204562.877	189733155.303	310880	1525101	17345711.496	51397963.609	19859	1366	217182550.701	76416	276696	15822	38561	13586	95380957.44	35744390.387
Control-238_162	187608	1046	98888	513689	489571.31	1898	16582	190659	3981822.657	161841	10530707.229	19976	140024029.064	11732	3320227.156	110975	3877041.324	57697	706591	35263328.708	1798315.693	21836186	180634	25832	6541	59638052	29645	5941	114118767.278	7984	610212	289089	31510269.66	558253699.132	153603355.436	167254	1280789	11246916.087	6317793.629	23009	978	225404966.061	101445	197559	13932	34653	37533	65657875.23	7394481.843
Moderate-461_186	237126	2069	61762	530370	896374.958	2228	70752	198767	1769048.778	250285	15382406.276	20873	281122536.223	4144	6073105.644	58984	432935.253	20844	926160	42460457.859	3122733.758	22447981	249060	36341	8661	91024406	46348	7376	151512480.145	17838	816561	421598	91952705.69	102064367.027	276296509.286	387383	2201590	19545554.778	73919823.475	16259	2906	189817486.24	70624	244340	9034	28271	7427	45483637.946	15735326.649
Control-239_163	317333	1425	53927	405147	697138.86	1833	13744	190350	2123547.354	473969	9920151.08	27444	192569242.418	6376	1567313.678	124315	2106245.846	45201	1154490	40945910.204	3228609.715	26941959	450187	45950	5712	53195897	21377	9179	125709075.037	12558	666944	259451	34816783.511	653742047.292	152858434.575	105598	991853	10988534.003	9056923.433	16995	2501	189067588.688	58876	278612	12712	34404	23979	33833510.416	6155804.305
Mild-442_184	406466	4752	66855	535986	2520657.199	4435	123364	187325	3699125.853	279740	16264321.029	33988	94998650.964	8921	7808936.13	140640	974949.515	52811	761773	37766864.849	4753776.769	31841906	299747	55033	9460	61007842	27548	5637	116673725.222	6549	1235094	491852	47396079.899	336333421.422	178366564.274	412200	1353635	17355318.328	13681646.26	21594	2189	219104338.528	106648	257200	13846	34549	12162	117453263.163	32001215.024
Moderate-472_194	267674	8302	65097	325541	NA	1902	16069	172807	1537312.047	640341	8905771.22	17812	369762927.501	10305	8394920.297	64934	4655489.976	32889	1450981	34934466.152	6026864.829	23119177	526147	86530	9959	65844588	21537	8359	136469989.79	26751	1335054	768237	54480930.456	710152983.244	173974226.919	270717	1031443	10977495.557	13338189.941	24851	1845	275051090.375	64325	257813	12943	30897	18885	143059670.005	20412552.279
Control-240_164	229731	2772	66687	360998	821972.837	6526	11832	180907	4210761.116	281333	15458085.28	22791	36233135.011	4220	3501926.493	125627	6988076.668	65541	938742	37142308.661	2418505.529	33797519	305291	37933	5972	65218845	24675	7925	105126859.85	4098	604166	309442	40377809.597	375611184.183	175267092.725	116340	722730	15702648.962	11721163.857	18463	2175	268707946.322	92739	292372	11934	34779	19977	50038029.365	13112970.614
Moderate-443_185	308081	1384	39369	664089	1246846.027	1726	17169	182697	17568419.531	1580318	7691861.892	18187	92498585.973	3116	4558359.071	63668	3389458.596	23587	3146063	41228410.797	3782358.011	30106597	1204463	223775	9391	63369454	24797	10084	150149884.772	6519	766885	389591	61954192.539	185850772.446	243622480.213	305077	2824131	14751120.521	18048330.89	18602	2851	349505250.871	63356	199171	15160	34085	22434	79213911.978	33984789.78
Moderate-478_199	297958	2254	202449	728174	1463361.613	3917	184690	185904	964542.01	1223303	8317640.961	27837	4726799.128	5541	5480386.975	102653	487550.294	56478	733612	29726575.869	4586814.891	26450115	939351	260720	9731	37258439	22428	4987	125134580.962	1476	462739	267431	37858630.279	1279893348.712	156040119.274	213737	956208	8930743.458	9072283.735	21177	2111	335112889.467	75279	299409	12961	25991	11227	26866495.817	15203325.288
Control-244_165	327446	3621	155971	389713	348640.617	1183	12929	186806	NA	110675	808111.573	26716	37802180.248	25266	63549.649	116307	331825.641	52289	960940	8173729.531	239524.931	30128185	167019	21275	8038	66767778	22898	5969	42214907.094	24798	484671	309632	18432096.328	64939792.937	44000999.687	166818	1032268	6564567.843	4046387.851	19742	1349	64528841.519	118683	408797	7162	36073	20017	4497897.023	1661599.735
Moderate-470_192	246969	6359	74541	293675	3628001.683	3488	18433	158932	3544074.279	154553	13762855.323	20470	982770193.933	6808	5259646.63	87873	1464794.201	47021	1762836	25116672.586	7441732.425	30033412	212009	18779	12057	96918446	20476	8373	96377387.511	51011	1250760	1224521	47794142.062	615952365.012	183576100.083	371542	957586	21595867.241	14740025.967	20986	1994	335301497.236	101799	264420	11603	27302	19594	92084239.275	35439156.64
Control-245_166	247189	8465	203807	198975	NA	3032	30431	195638	1803291.189	125278	18288187.711	31848	147049600.949	15566	967770.659	178845	9628880.624	80643	602944	27342573.757	2727782.279	21774185	204691	25243	6456	50612559	20040	11680	81560910.354	10803	1713462	575596	61813615.582	1105020947.778	178529751.351	149852	783399	21818109.573	15922058.945	16902	1912	196409538.572	58097	276532	9903	37907	27548	39035942.67	10565276.863
Severe-272_172	388997	1974	44139	288830	728617.96	2285	12397	187393	369139789.388	160854	8672398.62	22525	74878977.981	7323	2240485.326	133884	584448.299	73963	1472789	43827813.138	2819496.73	27891851	265812	39038	8692	87830899	21398	10244	99963312.048	8568	576963	378894	35062784.324	428626789.568	122228738.686	356232	1713510	12909613.175	9550010.972	17806	1948	265643885.892	87012	324304	8242	38058	19246	20639662.413	9228504.862
Mild-278_174	270661	4025	387990	1206884	876673.374	3000	92633	227762	3341212.912	362479	18123024.614	27496	347635661.009	26868	1981223.202	66221	8858386.525	21000	3481837	55986254.494	4261471.049	22770466	317775	41706	13441	92050403	41515	5494	196416966.897	26828	1117283	470121	47002665.059	524890697.721	134141402.811	168901	1084970	13549372.274	13046667.533	16993	1096	284823020.536	55496	210819	10277	39396	25314	62006309.277	17025059.958
Moderate-483_204	411112	1442	87582	904084	971493.031	1470	94329	222072	1351323.711	158640	8219602.027	28740	71836741.119	7795	2536737.013	58310	578262.527	29460	693671	61679357.344	3992856.021	22328046	242830	24503	8110	81825393	35054	9327	183454499.939	6757	540652	256977	53930922.344	1086887596.384	363947441.239	137481	1016433	8481629.341	19969259.007	22636	745	324259328.115	94732	276924	43606	32253	399886	49801610.025	22733490.039
Moderate-419_180	270328	1779	37340	546152	1278678.867	1286	12600	186640	3550130.735	768914	9211178.402	22532	144686566.28	4474	1971320.249	98898	5115209.628	61314	672039	38483573.178	2634506.74	25266663	658717	94515	6855	66426256	19229	7768	111680231.865	13363	1343202	398703	76440698.353	968818892.389	131035051.06	280798	1263710	10326954.202	19406912.273	19071	2244	262977992.604	108876	301219	13692	31283	21606	38910135.072	6219980.427
Mild-482_203	159313	6648	224700	770923	833453.717	1652	25383	191947	2203881.826	911792	5783033.613	30491	876576.013	3434	6197120.332	28781	431810.859	26436	695832	35705587.947	10575649.718	24064422	721435	121235	9785	43235789	20916	5968	128832983.552	3307	1064228	272446	49427377.723	664052838.14	218814926.488	332175	869303	7764057.615	12802250.228	25843	1124	220859440.561	93946	212901	10778	33644	18987	17982997.056	14411717.882
Moderate-473_195	259576	2215	89231	613389	1115310.372	2092	17797	213482	2112425.041	457097	13813668.302	21188	221995561.262	6864	3222301.17	101395	815874.556	48741	894831	35226691.024	2868509.88	21245454	423888	32913	8802	79963763	23258	8056	108132210.637	19691	608688	283652	42295920.606	1127080830.089	257880246.894	223423	1304054	11543810.425	10311562.332	20595	3128	192270963.802	73202	233200	9343	28827	14101	14998389.45	10269299.874
Mild-485_206	325917	1381	38709	436937	834025.84	1657	16124	167388	1940009.499	171840	9042886.128	21380	151081400.047	5226	3707473.174	69474	3077614.708	100338	574637	40959986.196	3589406.211	24156915	192080	34375	7406	89854879	22193	4509	168491751.788	15789	860091	223578	65272069.925	702032688.644	201930267.266	199737	1561569	13490713.373	24790002.807	26689	1838	281090968.778	150675	225954	12548	30106	16762	14523867.498	1407543.948
Mild-488_209	258298	2022	94745	492639	758101.795	1486	159788	155906	4215614.426	107940	8137750.549	32210	2194434.544	4773	2588519.345	29581	643889.871	14605	619138	22262063.605	2301072.383	27484853	167424	14773	10162	83898753	19149	4134	91536597.376	2215	501792	217810	62841425.797	913492398.238	170345004.198	219402	2381800	8817808.431	14608745.51	29780	1625	230525715.746	113222	236039	8973	27479	19911	80347036.762	22025528.918
Moderate-489_210	180701	748	35164	447829	813444.189	1644	11607	160142	1528056.011	748138	6407446.742	18590	19455183.654	3884	4140267.246	85517	544454.576	43653	888030	24019769.088	3743517.022	25160459	614065	73206	8727	43511538	18971	6178	97871296.343	4430	781550	190375	39666715.57	523653682.265	196814329.74	245006	2444631	11176113.864	8832794.685	27827	2167	293356239.468	97982	224146	7770	30132	15996	51940075.036	9852654.487
Mild-490_211	205905	682	22024	158591	45033.828	476	33326	108211	1090764.249	186985	3262923.643	21287	47180546.114	829	402356.798	7502	9309358.059	8265	388886	14549342.144	1513040.924	13330498	233404	26250	4921	29360847	12434	1891	70013634.331	4572	250422	98029	38167737.029	754030464.183	123320275.103	26506	508783	8246756.307	11036118.205	28235	638	116979051.085	116259	293104	14578	32422	34432	15056477.699	7220611.995
Severe-491_212	265220	579	48517	479579	577218.891	1084	91666	175716	1001142.43	136541	5735763.108	33821	30426616.539	2417	1071056.13	24182	683367.05	21295	382508	37135077.165	2923927.687	23233831	188539	25702	7008	66612618	18498	4417	107431288.159	4482	433753	173540	32627544.158	836785776.965	146108096.585	178438	1531997	8208577.384	7699587.282	29599	1176	213096951.042	137139	274444	7458	26690	12584	12269925.919	4887817.582
Mild-492_213	269703	6504	88974	1245851	3100367.566	5021	216776	210986	876817.364	208510	14687410.837	35578	213052611.103	7045	8693346.021	32731	630828.521	11175	840701	24876358.126	13770744.186	22798050	218550	39526	13885	57367956	30722	5220	84672895.707	20594	1218565	593918	54571008.149	910744344.475	106613105.941	84479	1130055	21499857.737	17298506.602	29850	1330	180040090.655	102563	256229	8092	30822	15063	22225580.029	10635498.455
Mild-493_214	240972	2385	78082	231990	1697653.631	1709	27963	154735	1767153.197	515581	6821880.335	26056	153255231.585	26255	3600658.983	79655	4095324.228	70163	507890	29535588.436	2773224.554	24768844	450526	83005	8812	68849955	17621	8513	106633835.887	10799	873682	258791	38148576.57	540986231.655	164204316.797	200586	689514	9896364.245	11588562.616	28760	1471	231089285.598	102090	268961	10205	37793	30656	65916028.329	17747611.857
Severe-494_215	605327	14	19	499	1425728.155	1	30059	6173	1828820.501	118	6446690.44	16499	113536139.966	147154	5567226.742	28015	1619959.757	31999	836737	40240594.433	4825848.453	31640914	319	49	7896	97115278	16515	5455	143921955.073	12231	1338004	337611	31198233.744	415373846.883	228803977.904	242721	4445818	9218359.532	7853544.718	365	87	254705735.322	244	226610	2519	6182	1352	3180628.084	10673891.851
Severe-494_216	544099	2428	80409	333088	1261085.965	1778	80139	158841	1451298.962	259596	9004473.98	22486	63537879.495	8019	6040417.662	14048	1001975.576	18244	910357	52258017.882	4240134.869	29755631	229944	36600	7935	98770684	25884	3813	167912785.359	5991	698414	323376	54263605.694	610050273.9	240616337.699	246253	2418423	9278712.622	22594563.129	29116	1437	288527130.799	139387	307228	29091	33106	162764	14887581.705	5581249.08
Mild-495_217	315929	2205	120843	810659	573297.991	5046	59913	199082	1595865.445	673194	11260965.626	21038	19620481.863	6745	1549417.163	98163	1017302.477	56680	630715	43408040.281	2658473.804	32759353	577550	71004	7151	82075561	21013	7764	170466709.456	6566	533517	225440	39989886.797	665487262.541	183062499.552	468563	1002224	11079010.998	9923886.073	24734	2731	254455726.668	85990	249044	9252	28059	14852	9323201.649	8056958.631
Mild-496_218	380240	1069	56184	369632	978041.355	2824	46509	183266	1237600.986	590227	7801665.237	33033	103570210.919	3273	2369675.412	22265	797216.441	17781	1176887	31595425.808	6139055.035	34222152	587838	65676	10362	52902847	21547	5041	112684301.078	11223	820459	301856	44230983.545	1000440106.207	135891890.793	205087	2051231	11097614.437	10306919.059	24728	1949	199010727.966	117018	287027	8852	30016	13948	24909084.851	9757409.098
Mild-497_219	378236	1513	47914	676645	1154852.851	2894	53438	186736	1467136.251	118723	12837493.301	33088	139066523.278	3923	3530255.272	75555	1064497.262	87734	1457196	33354181.045	3599419.722	30329100	174929	18178	10144	111272668	22107	6821	124003327.363	13636	871031	298064	43466065.055	671217436.025	207660250.19	280267	1208953	15218817.796	12360505.963	27201	2962	202873328.708	116448	236150	10723	29127	19866	37337118.634	18090099.691
Moderate-498_220	387965	7505	139033	1353562	2640659.795	2387	15849	224387	1503708.128	2045010	9882528.191	27319	154299881.785	3866	10442860.872	42455	1922567.356	23231	534197	54495915.474	8413932.677	20734680	1512525	398519	8608	47078291	23414	5456	203930895.261	11305	838466	398482	35384906.077	1073434875.996	183519183.425	90703	1651574	8461048.735	8004941.008	27742	2314	264645021.806	142147	275927	9514	31377	14018	23052945.964	8673673.206
Severe-499_221	389734	3665	328714	1126834	2350036.247	2868	32952	221309	1811818.994	1192136	12061335.501	26254	77169127.174	3823	9172077.645	7692	1321603.356	5566	651242	36795712.196	6324600.143	19414316	900685	192845	9395	41040826	27515	2402	158040916.253	7086	1202333	495336	37880987.279	627081052.861	218084113.543	78434	1174411	15653070.716	6735471.007	25602	1644	313656429.572	71861	247608	9339	28703	15181	56074542.711	42453686.843
Mild-500_222	225037	2095	22646	239582	655327.048	1424	49022	140226	1614120.745	246566	8215881.82	23587	76053244.004	2978	6623686.682	52058	581324.237	54992	333733	18668789.298	4784222.29	19897894	274992	80971	10564	46617413	13996	8615	79426056.65	8722	NA	266357	55435784.916	791981589.165	188450608.599	296294	2738659	10391584.856	15260696.257	28008	2247	184336037.799	91842	282384	11856	27361	15280	20211916.979	9875664.95
St_SF_pre	NA	608150	750616	611304	NA	1152	NA	233621	NA	552477	NA	NA	NA	14317	NA	NA	NA	NA	NA	NA	NA	NA	673880	281	NA	NA	NA	NA	NA	NA	NA	NA	NA	NA	NA	NA	NA	NA	NA	329098	416116	NA	609412	NA	63602	625722	324933	NA	NA
St_PA_pre	NA	NA	NA	NA	NA	NA	NA	NA	NA	NA	NA	NA	NA	NA	NA	NA	NA	NA	NA	NA	NA	NA	NA	NA	NA	NA	NA	NA	NA	NA	NA	NA	NA	NA	NA	NA	NA	NA	NA	NA	NA	NA	NA	5890	NA	NA	NA	NA	NA
St_BA1_pre	NA	NA	NA	NA	NA	NA	NA	NA	NA	NA	NA	NA	NA	NA	NA	NA	NA	NA	NA	NA	NA	NA	NA	NA	NA	NA	NA	NA	NA	NA	NA	NA	NA	NA	NA	NA	NA	NA	NA	NA	NA	NA	NA	NA	NA	NA	NA	NA	NA
St_AA_pre	15314	NA	NA	NA	27481.935	NA	61879	NA	NA	NA	52618132.554	12458	NA	NA	3299.589	3002	NA	67	2744215	166227.363	2883738.508	625586	NA	NA	3726	200739	88	146	48485515.317	2340	1655	3437	52620826.084	8815514.316	175233041.179	228	906913	30703543.674	9889853.132	NA	NA	44262847.847	NA	NA	NA	NA	NA	NA	NA
St_BA2_pre	NA	NA	NA	NA	NA	NA	NA	NA	NA	NA	NA	NA	NA	NA	NA	NA	NA	NA	NA	NA	NA	NA	NA	NA	NA	NA	NA	NA	NA	NA	NA	NA	NA	NA	NA	NA	NA	NA	NA	NA	NA	NA	NA	NA	NA	NA	NA	NA	NA
St_PA_post	NA	NA	NA	NA	NA	NA	NA	NA	NA	NA	NA	NA	NA	NA	NA	NA	NA	NA	NA	NA	NA	NA	NA	NA	NA	NA	NA	NA	NA	NA	NA	NA	NA	NA	NA	NA	NA	NA	NA	NA	NA	NA	NA	340	NA	NA	NA	NA	NA
St_AA_post	76829	NA	NA	NA	NA	NA	203074	NA	NA	NA	60449598.257	12899	NA	NA	NA	15376	NA	47	1230400	10206219.516	2434199.355	726003	NA	NA	2109	1762256	140	26	66401008.439	1094	6239	4939	17806897.36	3826260.265	180880986.017	289	897627	7073859.826	3171832.597	NA	NA	34768510.065	NA	NA	NA	NA	NA	9724.077	5994.1
St_BA2_post	NA	NA	NA	NA	NA	NA	NA	NA	NA	NA	NA	NA	NA	NA	NA	NA	NA	NA	NA	NA	NA	NA	NA	NA	NA	NA	NA	NA	NA	NA	NA	NA	NA	NA	NA	NA	NA	NA	NA	NA	NA	NA	NA	NA	NA	NA	NA	NA	NA
St_BA1_post	NA	NA	NA	NA	NA	NA	NA	NA	NA	NA	NA	NA	NA	NA	NA	NA	NA	NA	NA	NA	NA	NA	NA	NA	NA	NA	NA	NA	NA	NA	NA	NA	NA	NA	NA	NA	NA	NA	NA	NA	NA	NA	NA	NA	NA	NA	NA	NA	NA
St_SF_post	NA	1146690	1128040	879651	NA	2185	NA	126879	NA	515087	NA	NA	NA	7315	NA	NA	NA	NA	NA	NA	NA	NA	667266	195	NA	NA	NA	NA	NA	NA	NA	NA	NA	NA	NA	NA	NA	NA	NA	519730	385769	NA	856130	NA	53233	907987	157930	NA	NA
[truncated: 189 more columns]

## Sheet: Height
Supplementary Table 1. Targeted metabolomics.
Sid	2-aminoadipic acid@14.99-gc	2-hydroxy-2-methylbutyric acid@3.52-sf	2-hydroxy-3-methylbutyric acid@4.68-sf	2-hydroxybutyric acid@2.49-sf	2-hydroxyethanesulfonic acid@1.02-qpneg	2-hydroxyglutaric acid@8.23-sf	2-oxoglutaric acid@13.01-gc	2-oxovaleric acid@14.29-sf	3-hydroxybenzoic acid@7.71-qpneg	3-hydroxybutyric acid@1.65-sf	3-hydroxyglutaric acid@1.36-qpneg	3-hydroxyisovaleric acid@7.80-gc	3-indoxyl sulfuric acid@4.66-qpneg	3-methyl-2-oxovaleric acid@14.26-sf	3-methylglutarylcarnitine*@2.64-qppos	3-methylhistidine@16.68-gc	3-phenylpropionic acid@10.28-qpneg	4-hydroxymandelic acid@15.21-gc	4-hydroxyproline@12.43-gc	5-aminovaleric acid@1.09-qpneg	5-Hydroxy-DL-tryptophan@1.50-qppos	5-oxoproline@12.35-gc	Acetic acid@1.65-sf	Acetoacetic acid@12.83-sf	Adenine@16.19-gc	Alanine@6.89-gc	Allantoin@16.81-gc	Alpha-tocopherol@29.39-gc	Aminocaproic acid@1.27-qpneg	Anthranilic acid@13.42-gc	Arabinose@14.16-gc	Arabitol@14.80-gc	Arachidic acid@23.63-qpneg	Arachidonic acid@20.10-qpneg	Arginine@0.98-qppos	Asparagine@14.12-gc	Aspartic acid@12.36-gc	Azelaic acid@9.66-qpneg	Behenic acid@24.91-qpneg	Benzoic acid@9.49-sf	Beta-hydroxypyruvic acid@13.75-sf	Betaine;Valine@1.04-qppos	Butanoic acid@5.35-sf	Cadaverine@4.73-pa	Capric acid@14.38-sf	Caproic acid@11.79-sf	Caprylic acid@14.10-sf	Carnitine C10:0@12.17-qppos	Carnitine C10:1@11.39-qppos
BlM_pre	471	29	12	40	17228.361	4	1475	7420	76498.985	76	100666.28	3408	NA	53	NA	636	NA	103	1467	74772.375	2612.079	147311	6930	5	1430	22276	37	93	188222.42	1324	2417	1249	920143.838	131320.917	1495352.67	264	7604	1918423.781	183912.325	2484	211	4154245.417	548	53910	1277	3898	3192	NA	1927.538
BlM_post	220	15	15	54	13826.735	10	1615	3030	56030.095	NA	74408.536	4411	609.821	76	NA	977	NA	48	16541	98300.67	1964.699	114875	7007	22	784	85646	73	114	244000.599	533	9013	2065	987319.541	258127.662	1203432.606	1225	6077	1355704.102	175530.46	4637	177	2547773.794	797	65157	527	7210	1346	4404.105	2425.649
QC_5a	87549	362	8726	65592	NA	230	53096	43397	5457409.892	100710	692708.605	13031	6284637.564	342	538243.669	24837	561062.433	16826	537077	2084467.521	772484.954	10273404	65312	1726	4261	41472304	8538	5395	13851085.494	7763	304894	156099	2223700.396	95069221.133	33605104.511	223026	802447	1665287.454	633001.77	4098	585	40377764.761	7193	48430	1222	4762	6381	7800228.454	2458606.841
QC_5b	63085	349	8687	65876	129017.605	211	47617	41083	4784878.291	97753	634851.593	11626	6096094.432	318	470641.857	24488	491883.637	15309	549146	2036183.301	636411.95	9432750	66274	1732	3424	43653960	7640	4140	11318414.979	5917	273993	150941	2009326.233	79263708.091	34537231.108	208011	738155	1572983.061	574955.146	4132	606	35313440.129	7296	48922	856	4949	5596	6266529.996	1842451.796
QC_6e	NA	NA	NA	NA	NA	NA	NA	NA	NA	NA	NA	NA	NA	NA	NA	NA	NA	NA	NA	NA	NA	NA	NA	NA	NA	NA	NA	NA	NA	NA	NA	NA	NA	NA	NA	NA	NA	NA	NA	NA	NA	NA	NA	NA	NA	NA	NA	NA	NA
QC_4a	105603	379	9634	63773	122889.698	264	74354	40413	5946029.568	95340	747659.866	20738	6963363.64	4220	518040.672	25050	572533.523	16337	843775	2522112.806	612321.021	12709256	62364	2138	5308	36001626	9055	6423	11338233.417	9248	404980	186564	4627499.796	116813085.284	29621422.768	153311	759230	1787249.087	1564361.604	3194	577	34904431.197	7243	48368	3286	5181	7554	7512128.47	2007621.339
QC_5c	69532	401	9226	68586	150945.6	245	49547	38767	5627155.341	97425	836691.378	13885	6681177.486	383	524961.74	25483	557998.989	14548	509815	2278584.35	715104.896	9939465	66137	1817	3340	47819943	7843	5014	13423909.511	6624	267471	149916	2196322.654	95938994.822	33433458.529	178227	758185	1579000.908	697875.292	4317	790	39245494.027	7487	50369	998	5499	5294	7172240.763	1944129.145
QC_6f	NA	NA	NA	NA	NA	NA	NA	NA	NA	NA	NA	NA	NA	NA	NA	NA	NA	NA	NA	NA	NA	NA	NA	NA	NA	NA	NA	NA	NA	NA	NA	NA	NA	NA	NA	NA	NA	NA	NA	NA	NA	NA	NA	NA	NA	NA	NA	NA	NA
QC_4b	108145	319	9871	69921	171887.789	252	71616	44458	5244598.475	99661	696816.533	19281	6904063.976	9676	457470.5	29583	564205.326	19195	568567	2007639.267	647501.196	13505222	65530	2074	4099	44433229	8594	5664	11044365.813	8018	348535	180515	4270300.573	103938874.756	29987524.045	154285	729808	1688786.202	1419088.737	3404	579	34195684.239	6964	49212	3281	5476	8307	6855225.952	2026660.944
QC_6a	104846	441	13280	82616	NA	329	37711	50193	NA	102489	NA	14748	NA	4440	NA	19511	NA	8455	380839	NA	NA	10164937	67832	2995	4093	30919949	7662	4315	NA	5695	263173	153322	NA	NA	NA	117484	653553	NA	NA	4224	884	NA	8977	NA	1755	7259	11154	NA	NA
QC_5d	76168	351	9552	67023	138754.557	206	48862	32869	4900826.534	92252	697376.653	14269	5907431.2	556	429563.645	23366	482958.239	14004	535585	2017952.876	665847.877	9743209	62073	1571	3042	48793594	8702	4671	10843703.87	6803	263384	149667	2079382.423	84421003.029	30229315.127	174722	730993	1619149.718	618726.778	4396	926	34256438.068	7475	50216	331	5395	3943	6656441.793	1786960.673
QC_6b	80383	413	13412	87615	NA	334	38996	50122	NA	106828	NA	16108	NA	18781	NA	21396	NA	12979	482914	NA	NA	9891589	67097	2954	3159	32437777	7224	4562	NA	6183	275875	155759	NA	NA	NA	138506	731073	NA	NA	4371	983	NA	8855	NA	4136	7223	10499	NA	NA
QC_5e	72707	473	9323	68750	166226.499	244	45011	10686	5419873.707	86555	794689.815	14950	6681521.336	165	482858.925	23803	581060.239	14020	542016	2331532.551	772769.715	9796621	57519	1489	3302	45816664	7291	4711	11472163.758	6010	250744	152234	2266405.583	95461478.198	27792677.075	159103	776149	1360099.657	725743.248	4483	1251	38679969.317	7126	49749	180	5420	3133	6448034.338	1771879.876
QC_5ee	NA	474	9680	72940	NA	259	NA	6919	NA	81513	NA	NA	NA	192	NA	NA	NA	NA	NA	NA	NA	NA	57298	1398	NA	NA	NA	NA	NA	NA	NA	NA	NA	NA	NA	NA	NA	NA	NA	4247	1391	NA	8228	47607	127	5323	2615	NA	NA
QC_4c	106806	NA	NA	NA	140464.419	NA	73462	NA	5796165.574	NA	748270.003	19391	7072741.622	NA	522368.002	26219	650921.429	15538	541625	2374455.36	668827.065	15261480	NA	NA	6644	53167890	8911	6048	11779340.841	7901	346522	175791	3423581.387	97358500.491	28172305.25	147882	748009	1871450.061	1118598.12	NA	NA	39980033.944	NA	48585	NA	NA	NA	7244576.358	2175626.722
QC_6c	101013	429	13267	85760	NA	411	40380	44650	NA	102757	NA	15855	NA	11886	NA	21155	NA	12230	490172	NA	NA	10443274	68461	3528	4254	34355014	7585	5324	NA	6185	286230	159255	NA	NA	NA	133672	724631	NA	NA	5517	840	NA	9530	NA	1848	8128	11191	NA	NA
QC_6ax	NA	608	13558	98433	NA	462	NA	47350	NA	113071	NA	NA	NA	142	NA	NA	NA	NA	NA	NA	NA	NA	74563	3201	NA	NA	NA	NA	NA	NA	NA	NA	NA	NA	NA	NA	NA	NA	NA	4112	744	NA	9784	NA	1382	7223	8665	NA	NA
QC_5f	NA	NA	NA	NA	155786.004	NA	NA	NA	5345602.635	NA	735458.259	NA	6626544.065	NA	453798.486	NA	553750.806	NA	NA	2167400.304	583163.799	NA	NA	NA	NA	NA	NA	NA	10678107.109	NA	NA	NA	2267333.636	89946057.081	33201773.739	NA	NA	1254142.119	701197.682	NA	NA	34818709.79	NA	NA	NA	NA	NA	6172926.451	1476448.958
QC_4d	NA	363	10250	72064	113783.027	278	NA	44203	5556577.265	99704	758223.46	NA	7228793.106	17453	464478.214	NA	546024.622	NA	NA	2181547.526	630779.821	NA	64693	2233	NA	NA	NA	NA	11325236.058	NA	NA	NA	3571284.943	89667659.212	28707514.801	NA	NA	1584986.199	1104441.29	3900	629	37316242.067	7523	43412	1358	5763	8845	7528819.446	2034505.169
QC_6d	99048	581	13752	86184	NA	372	44997	41507	NA	102296	NA	16723	NA	10998	NA	21590	NA	13543	540851	NA	NA	9959288	67384	3126	3605	33100778	6565	4555	NA	6942	320168	165853	NA	NA	NA	132443	751667	NA	NA	5645	850	NA	8999	NA	1463	8759	4209	NA	NA
QC_4e	NA	393	10547	71340	140751.573	293	NA	43588	4296720.646	100015	649760.831	NA	6138865.32	7899	362538.038	NA	441356.808	NA	NA	2000870.032	503519.521	NA	66697	2251	NA	NA	NA	NA	10350724.06	NA	NA	NA	2791172.36	50373607.186	24344032.855	NA	NA	1286800.343	848562.705	3973	730	32170460.767	7583	44306	1395	6230	8417	5530214.071	1591078.024
QC_4cc	NA	NA	NA	NA	NA	NA	NA	NA	NA	NA	NA	NA	NA	NA	NA	NA	NA	NA	NA	NA	NA	NA	NA	NA	NA	NA	NA	NA	NA	NA	NA	NA	NA	NA	NA	NA	NA	NA	NA	NA	NA	NA	NA	38592	NA	NA	NA	NA	NA
QC_4f	NA	NA	NA	NA	110306.936	NA	NA	NA	4655988.406	NA	689305.807	NA	6205941.805	NA	357449.336	NA	494098.828	NA	NA	1996064.127	489994.918	NA	NA	NA	NA	NA	NA	NA	10084271.257	NA	NA	NA	2973599.711	52380854.19	11687127.11	NA	NA	1367606.222	838899.172	NA	NA	15499777.297	NA	NA	NA	NA	NA	2556043.966	1704861.854
QC_7a	89670	496	12290	79884	NA	391	6709	49349	NA	103297	NA	13724	NA	2498	NA	22456	NA	8950	589315	NA	NA	11650663	68981	2695	3934	41161946	6659	5161	NA	6591	305354	180371	NA	NA	NA	98667	746598	NA	NA	4985	891	NA	8125	NA	1346	7217	5110	NA	NA
QC_7b	113198	609	13582	85346	NA	421	7574	51731	NA	105090	NA	15142	NA	2626	NA	19662	NA	12668	655826	NA	NA	12182244	71452	3008	4446	42828215	6203	4485	NA	7915	343907	195911	NA	NA	NA	108812	763522	NA	NA	5586	1007	NA	9328	NA	1256	8171	5017	NA	NA
QC_6aa	NA	NA	NA	NA	NA	NA	NA	NA	NA	NA	NA	NA	NA	NA	NA	NA	NA	NA	NA	NA	NA	NA	NA	NA	NA	NA	NA	NA	NA	NA	NA	NA	NA	NA	NA	NA	NA	NA	NA	NA	NA	NA	NA	NA	NA	NA	NA	NA	NA
QC_5aa	NA	NA	NA	NA	138661.228	NA	NA	NA	3952788.503	NA	574286.059	NA	4909672.438	NA	287601.082	NA	405554.455	NA	NA	1716605.554	382205.633	NA	NA	NA	NA	NA	NA	NA	8745181.888	NA	NA	NA	2168615.179	83258904.71	26535812.013	NA	NA	960673.387	654380.573	NA	NA	27059663.534	NA	42907	NA	NA	NA	5203831.201	1214194.635
QC_6dd	NA	694	16811	95146	NA	595	NA	6889	NA	102875	NA	NA	NA	13694	NA	NA	NA	NA	NA	NA	NA	NA	69304	3192	NA	NA	NA	NA	NA	NA	NA	NA	NA	NA	NA	NA	NA	NA	NA	6323	979	NA	11733	NA	410	10111	2547	NA	NA
QC_7c	107963	513	13938	81217	NA	359	7260	47507	NA	100996	NA	16522	NA	1872	NA	20338	NA	11465	699652	NA	NA	11871416	67095	2467	4768	40437869	6990	4493	NA	8266	363611	191072	NA	NA	NA	90613	763805	NA	NA	5994	1071	NA	9162	NA	586	7969	3766	NA	NA
QC_7aa	NA	634	13818	86951	NA	436	NA	43279	NA	104104	NA	NA	NA	5108	NA	NA	NA	NA	NA	NA	NA	NA	68848	2760	NA	NA	NA	NA	NA	NA	NA	NA	NA	NA	NA	NA	NA	NA	NA	6001	923	NA	9728	NA	847	8199	3616	NA	NA
QC_7bb	NA	578	13567	81203	NA	448	NA	45654	NA	104019	NA	NA	NA	2027	NA	NA	NA	NA	NA	NA	NA	NA	67364	2606	NA	NA	NA	NA	NA	NA	NA	NA	NA	NA	NA	NA	NA	NA	NA	5677	817	NA	8794	NA	647	8170	3715	NA	NA
QC_5bb	NA	NA	NA	NA	114564.577	NA	NA	NA	4704888.975	NA	633573.585	NA	6029584.717	NA	338002.647	NA	488553.823	NA	NA	2041846.765	432524.509	NA	NA	NA	NA	NA	NA	NA	9815423.481	NA	NA	NA	2040370.638	71715902.889	23287208.654	NA	NA	1015902.336	557292.77	NA	NA	28447025.478	NA	NA	NA	NA	NA	3554863.584	1353314.611
QC_6bb	NA	NA	NA	NA	NA	NA	NA	NA	NA	NA	NA	NA	NA	NA	NA	NA	NA	NA	NA	NA	NA	NA	NA	NA	NA	NA	NA	NA	NA	NA	NA	NA	NA	NA	NA	NA	NA	NA	NA	NA	NA	NA	NA	NA	NA	NA	NA	NA	NA
QC_7d	113496	674	13736	80042	NA	406	7758	44521	NA	97555	NA	16900	NA	4116	NA	19627	NA	12842	710765	NA	NA	12155990	64590	2580	5604	38412128	6322	4918	NA	8104	389048	202250	NA	NA	NA	68181	742568	NA	NA	6063	1151	NA	8895	NA	294	8562	3586	NA	NA
Control-4_1	78045	193	3838	47494	66785.998	165	13079	34218	192954.083	13607	1648029.003	8227	2449525.271	721	197531.255	26978	47453.453	24834	418553	1828892.809	1545195.853	9786116	14593	790	5724	30311023	9003	4736	13313737.839	6654	1716562	169331	2538720.569	97559160.212	47972375.628	119534	882255	2584948.818	850330.38	1851	202	47932800.402	4515	23007	6444	4410	14570	3699958.32	1423674.134
Control-6_2	128202	280	3794	50208	101199.106	186	62298	35720	1973098.94	160946	679435.649	10009	8073742.894	456	413600.771	18318	86205.381	29540	230594	1656194.608	652364.126	13309849	103370	4772	8208	31929494	8552	5760	11074008.558	10812	243247	220166	3934615.373	121971205.047	39649810.38	168205	1294925	1576460.441	845185.034	2520	230	42715066.785	5803	19568	2245	4956	6886	4865233.062	1753557.029
Mild-7_3	186814	150	5881	30527	95714.476	206	195946	37439	190409.702	13251	2023369.979	17347	5763901.804	1259	333154.402	32747	1017481.054	60544	1623837	2297196.456	602886.746	23546364	21610	402	9633	104849681	9927	8635	15567168.469	14164	593179	257050	3835803.741	101687628.107	42964187.686	409790	1571765	1801746.713	1740628.994	1933	190	48426744.959	5123	27519	1520	4856	9434	1717616.612	1367250.944
Control-8_4	78093	271	13407	55397	117062.613	208	26578	37667	108555.238	50017	694605.721	14160	3383647.185	1049	332183.589	23596	361654.159	43910	453384	2293611.469	551475.091	9263917	31505	1661	4779	22985910	10330	5708	16538518.004	4792	219265	128032	4571728.065	115308281.794	48556654.534	333174	1687738	1542469.435	1051998.428	2648	114	46570643.071	9042	27309	1081	5075	7190	8064659.305	1601775.921
Moderate-10_5	70654	477	10372	24159	NA	338	227181	42431	388437.567	21993	3102399.911	16032	13480403.129	811	395870.299	51293	658914.631	59276	772858	2039049.325	543798.001	9523184	14357	1030	4893	48418421	9597	8934	11562727.836	17670	384046	335216	5225185.88	124132010.771	32413511.175	286828	1065721	1974088.185	1515496.939	2026	191	42695738.498	5223	23202	3030	5095	8341	8212768.229	2124103.384
Control-12_6	103028	242	9127	62716	70612.702	268	33709	41006	173247.477	57400	513822.896	12573	4546004.913	8985	374678.839	48431	1330411.785	59734	490214	2229384.86	435530.81	13774593	35724	1898	4180	35332694	9028	6475	16691696.232	5945	244367	159043	2996111.65	60383995.105	51697593.932	432458	925860	1497363.263	1085186.928	2247	140	51562588.699	6623	21948	3680	5963	17195	5293670.018	638624.665
Moderate-13_7	125472	207	10332	84959	68386.915	544	299477	39614	86907.767	41617	936725.676	13900	2262490.288	2308	235682.972	16317	63016.575	13120	422787	2361031.012	823352.603	14902665	26126	1518	4430	37298494	8807	4479	14809642.669	4086	374373	120257	3455843.169	135364430.036	26911355.586	458169	2507756	1462511.751	841640.534	2905	164	37018350.647	21147	23375	1467	5188	5373	4890204.896	1869867.272
Mild-14_9	88845	218	22759	45880	79671.732	201	114588	44500	329922.388	19611	3831700.053	14421	3309741.291	5815	190786.007	26527	268437.699	26969	1234199	2896073.892	359832.589	12620329	24039	404	6571	87638106	8653	6300	14726931.782	5545	269853	139040	2404363.618	138715340.839	44134119.927	199712	1393048	1535787.58	680084.867	1931	791	35389978.069	5786	17135	1047	4853	4248	12261878.673	2955487.575
Control-16_10	93560	372	11840	117679	109131.343	121	212603	48541	200192.318	282806	919328.85	13822	1580628.673	953	517462.444	21305	199900.138	12755	479651	3160621.772	893475.383	12592845	186049	7657	5028	36077568	9804	5384	17789038.358	4462	306905	181095	2894061.854	137961590.35	43773565.602	299746	1599517	1666798.357	850657.593	1988	246	58461289.289	6897	29439	1651	4558	3804	8255769.365	2284227.01
Control-17_11	95298	224	6262	31760	86149.869	158	50395	42236	278110.56	31225	1075768.342	12928	6843525.264	3602	425902.31	35444	402164.492	29147	907678	2090169.809	347729.207	10337088	38185	1561	4182	35677239	9041	4944	10660790.726	9641	206402	146812	2497230.494	50799174.489	48506272.009	281006	903051	1233715.84	681388.158	2178	175	45064565.186	6793	21374	2510	4958	5401	865434.206	290586.487
Mild-18_12	215097	268	6447	43875	72036.816	198	90503	51028	296343.481	36114	1575739.846	13460	17742527.134	969	735532.914	8935	1122604.941	7103	1074701	3497093.948	607282.988	8313392	21288	1354	5908	47888375	9395	748	16949242.095	17326	219241	125885	1598680.034	23693160.282	36251935.735	262549	649851	1490114.074	304921.596	1966	106	36903176.685	3821	35027	2048	5298	10959	2469426.314	853200.236
Control-19_13	149676	313	6411	62308	111272.252	215	116720	42164	109486.685	183147	1577413.08	14007	1784160.078	930	1366069.025	24817	248094.909	36651	590094	1780436.917	595663.312	11048279	118839	6755	5027	34150516	7462	3517	12625005.559	2880	368814	175479	5345866.291	126147376.484	39917660.102	225482	1459135	2048252.16	1283356.574	2822	323	29623097.224	7384	27533	2393	3902	3131	6208341.736	1648213.728
Moderate-13_8	121977	307	7145	41148	82644.26	261	173507	46217	238588.246	28138	1944425.243	19926	5644193.061	849	241316.917	18955	59659.147	15067	888668	2557756.669	674616.355	14637153	19515	1174	7379	66965795	10664	3703	14239069.86	8274	374289	180099	8135405.98	161539441.578	32996757.544	279759	808282	1903162.071	6859740.949	2293	78	41505457.678	9413	23409	886	4790	4782	9213248.282	3410019.397
Control-20_14	136819	224	3954	84284	84224.853	221	46591	45534	112682.868	232069	465759	14420	4205190.988	1232	440235.509	21601	216180.249	25253	536440	1836600.711	501779.692	10300964	152737	8265	4718	27625665	8983	4923	13469232.244	7809	331821	114726	4582768.293	99803703.302	43554585.001	236113	1592605	1484495.479	1096461.012	2452	636	34780487.483	6406	27108	1631	4837	7008	4764908.42	1126190.342
Control-21_15	81215	271	10779	143928	46844.433	211	96170	46780	NA	602476	141445.902	12577	288653.354	497	41937.628	13932	11211.465	10973	691670	1046100.886	91071.193	13445387	386761	14901	4283	47136927	8788	4586	7557178.553	2414	285261	105166	1103049.489	31518955.704	28355980.454	295190	2469299	1102758.656	276736.772	2185	288	7633261.766	4183	28659	2589	4519	8917	426551.087	221685.654
Moderate-26_20	103745	127	10552	130986	31157.282	170	176022	46278	101341.479	64532	1293453.134	16648	2678195.34	1560	402823.768	9825	102068.738	5359	500353	3166841.242	433150.625	12387349	39176	2749	6407	39298275	9407	4274	18727596.063	4086	251373	69003	5632759.387	135090167.732	52634404.57	291852	1319870	1449581.171	2638147.434	1725	205	83826578.73	7080	22997	2274	4762	19314	3660336.056	1470765.639
Control-22_16	324823	919	8551	43980	373895.905	173	540444	41451	118769.144	25437	1793375.923	14180	37585320.232	1796	1485293.373	17758	25651.678	8830	587336	3758678.903	2000948.941	14841565	16011	618	5906	72144557	8762	5982	20947431.497	37494	406826	389931	3520001.074	96801526.89	58919134.667	457641	2507692	1537855.838	1140522.453	2352	893	31862613.86	4008	24208	1177	4873	8224	8639111.271	3032266.386
Control-24_17	96205	253	8343	42595	70520.547	124	335756	42889	279609.235	20845	1130822.913	13069	64338.673	1799	429050.182	11655	22956.28	8867	282162	2446929.99	749796.281	12295132	20304	941	3534	45784903	10174	3193	14571978.002	1724	221283	137535	2627624.861	48725390.319	56514910.819	215379	2037770	1430535.303	758960.718	1414	239	51154285.415	6156	26973	777	3515	3171	2730118.173	759946.444
Mild-25_18	32621	224	5795	38013	45019.457	163	6024	47027	321722.703	19873	1508275.084	6043	4360238.803	2017	268327.773	26385	120697.175	24850	181616	3000587.235	423389.701	6100572	19864	709	2596	9740144	6074	4808	16105966.753	6735	96208	57431	2606973.861	38952244.496	26348236.165	100576	224805	1912403.821	1299490.243	1561	47	49629100.152	4240	28199	1108	4590	7234	1910353.753	836974.716
Moderate-26_19	178876	405	14406	169528	104742.588	350	149514	51969	232148.014	72098	2258399.546	14788	10958196.487	2180	640768.607	10399	1204249.091	5163	606173	4623706.759	731790.209	12582566	36816	1995	5741	75851126	9877	4533	25206106.949	10748	272307	144383	4123022.022	76083027.544	48830304.395	244676	1439147	1526073.781	2055910.145	2292	142	69275727.223	7691	27668	1465	4760	5149	6319418.318	2615996.153
Control-27_21	76892	181	40856	10094	293486.172	222	22231	35145	58822610.068	11290	901690.883	8575	596445.439	4003	4102124.098	12584	37377.345	19144	223578	1590062.796	965135.794	9665559	18244	455	5142	30161073	7308	3233	9580514.273	1860	417790	221105	1958585.55	53636810.765	20010739.786	66632	500389	1818797.952	634239.821	1961	175	66407603.346	4054	25117	958	5277	8179	3375528.585	826479.641
Severe-47_36	156103	138	25925	114679	145743.647	186	208910	34903	118301.09	37294	605756.765	13085	48156.108	343	101658.585	6366	20583.046	8807	435551	2890582.47	648702.103	9780069	17395	1472	5720	33685615	8757	3102	15880345.802	1427	199581	100931	10843259.068	294672087.347	51388451.661	554326	1845065	1373023.209	7821935.597	2083	616	20952249.206	3955	23041	9112	4268	23011	634581.798	240836.677
Control-28_22	34854	482	3937	18581	124123.954	68	54833	41885	388072.843	13070	754679.599	12202	16847684.162	1593	927442.212	12033	1010600.864	12070	1073050	2615924.703	682519.931	10362388	15518	586	5463	36385227	8063	4842	16234805.468	16234	201280	173203	14359050.342	91243265.546	25234079.316	295448	580112	1572997.782	3054971.539	1806	268	43917532.894	5214	22579	928	4939	7539	3247933.842	1049880.38
Control-29_23	63214	472	8953	24303	136416.096	149	72625	45271	513246.683	15590	888150.503	14502	19729248.852	1882	588885.854	43282	348408.74	53736	416471	2284606.631	988682.734	9887024	17399	959	3875	37880155	8829	5503	11482373.72	14324	194139	175388	3367559.136	111243463.35	34461111.54	203797	851071	1589727.135	1302856.901	2470	333	27179991.099	9697	27673	1548	5568	10126	4047423.044	812433.489
Mild-30_24	81764	118	4369	46327	24941.9	175	54407	39304	646584.993	10536	545903.199	10042	4580749.557	2259	151096.745	16869	848973.757	16525	490274	1457011.868	1010141.23	9862689	19015	272	2366	55690692	8173	4079	7608222.179	4864	184886	130497	2447705.478	104548499.831	36841034.61	254702	1488631	1254886.432	917841.881	2411	300	50996906.839	6887	28208	1714	5237	8078	551524.038	340091.544
Control-31_25	108921	440	8013	108172	69515.811	193	112321	52682	151053.802	59562	1339094.35	14422	9622474.973	5518	422256.157	23270	151835.028	10577	273966	3695405.93	528747.201	10154942	35580	1613	7153	51030407	8959	5459	18749199.984	9821	229971	137313	3452231.651	96913828.247	49601326.645	104518	766065	1996854.749	1083170.365	2538	175	41639176.318	7701	31989	1259	5961	7737	14132355.019	3305249.87
Control-32_26	144621	526	11436	46264	209423.673	328	48154	46124	1442831.528	116310	861033.167	8337	9755845.039	667	1821314.791	10334	1115991.678	11000	550781	1965323.561	590640.136	13565158	75357	4172	4059	32005844	9238	3121	10885079.646	6556	280943	214021	3768239.197	119186710.816	25496797.69	152309	691647	1489105.963	1122714.338	2398	258	49241183.79	7252	26735	1413	5379	10279	13893932.816	4407613.88
Control-34_27	111917	316	9426	38132	146532.766	296	38452	42624	99719.881	27509	792233.18	10536	6801442.064	3131	732290.226	21668	855469.931	20489	842761	3448480.148	409193.184	9357584	16057	897	3455	63344920	6561	3673	20159872.068	7217	355712	147476	1666888.901	40326756.044	53805862.487	241097	938072	1434945.622	510832.506	2294	216	51233730.545	8325	20989	1590	5941	9681	2385591.498	632627.632
Control-35_28	63006	276	3731	42391	96979.531	183	34042	42782	1150234.684	21751	547737.463	5921	6995370.561	5443	258338.902	31947	59658.205	46695	138976	2024183.285	560062.041	8165980	19226	462	3185	12466001	6458	5796	11700001.286	6410	159270	180910	3709996.559	110165935.992	34585734.311	82785	660562	1405019.031	1169048.031	2144	349	23184667.622	5116	26819	1476	5049	7102	28055613.93	2137608.113
Severe-47_35	84414	127	19360	123519	164663.578	276	84275	43892	158895.556	34977	843556.168	13134	1360023.958	450	393156.145	6990	184050.861	4202	261446	1486159.151	1260992.859	5943358	20620	1043	5352	22336440	9182	2459	9023210.918	2802	214867	98283	3558287.299	175357691.527	36750604.237	110444	1562776	1487398.681	803957.729	2125	624	29898996.163	6838	28506	837	4381	5775	6241890.088	1849677.593
Control-36_29	107070	298	5382	64535	113337.85	195	66095	44067	174545.002	84433	595697.149	13494	7609085.255	1001	300337.374	21773	47206.685	17052	516263	2018482.455	379351.279	11314393	56142	938	4275	37080735	8697	5865	11595855.964	11984	229393	167997	3824844.52	87073889.635	34812017.261	199186	950259	1205898.971	1330583.491	2440	522	29086608.893	8024	24230	777	4568	5520	9555417.619	3691793.333
Control-37_30	139260	188	5738	35959	104457.714	177	83369	40719	152809.742	26997	493382.967	9969	3010215.926	512	305208.293	19798	233864.391	23324	139173	3237598.609	475246.436	17149349	18572	373	2337	37643760	7850	3541	16626324.192	3458	187284	96082	2441148.785	77163988.597	29480626.947	195438	778214	1305701.718	753004.988	2272	421	46032549.516	7694	24737	978	4319	6506	11299700.931	2922783.414
Control-38_31	77428	322	4582	52156	149053.966	172	32565	42142	434374.226	93586	341492.299	9311	5587086.795	561	226416.492	24628	320942.245	20886	857638	2015950.883	713238.895	8706936	61308	1683	2934	32775782	8836	5203	10991182.217	10504	147503	113409	2565565.982	90081350.936	42603260.693	256825	1272814	1103790.101	707253.43	2412	703	25119841.142	8163	27354	898	4938	5489	7548388.214	1718404.568
Control-39_32	61091	138	2466	63988	88778.444	156	32357	37460	381266.332	132748	327350.597	13226	2706721.352	661	228515.082	27388	254471.9	29922	385361	1128586.831	333428.01	12317658	87137	1088	3196	30841386	8826	4403	8339011.382	4853	189855	123384	4096607.468	103541535.44	41335913.685	250252	1221301	1347499.764	996476.158	2440	608	31938113.004	7036	27343	990	5627	6139	4837573.171	858872.183
Moderate-40_33	111718	148	2280	68702	100208.701	79	91808	39139	91200.202	22018	854540.518	13720	4304361.177	248	278571.553	15223	160264.264	11475	198578	2028374.492	431838.171	6776690	18293	1715	3543	30827773	10151	4632	13225764.439	6067	141634	74346	2902634.691	69378812.361	43081589.21	155810	787300	1432464.718	990862.054	1734	113	36257936.678	7441	22912	1067	3670	7761	1233810.216	502300.064
Control-41_34	121608	180	4349	19338	120448.265	120	16405	28321	221404.44	40539	786447.101	9892	7917464.584	836	304337.437	16213	2583109.851	14678	455791	2172076.485	481358.487	11658939	25853	488	5841	42075447	7613	4351	12354758.42	8016	665118	173355	5613317.75	117035330.573	33581904.704	113331	715808	1706353.297	1431038.562	2302	606	37995623.424	4427	33933	716	4436	4100	7845580.896	1768686.699
Severe-47_37	94961	720	15835	217155	306173.995	277	51579	45073	105360.494	266859	603483.841	11670	130831.905	394	308633.62	20831	21731.301	16661	420657	2217512.746	1014097.083	8700849	182522	15088	5122	23949689	8836	3513	15898306.105	1618	247926	143168	3807709.86	104756014.133	31143961.526	238308	615132	1482289.286	749175.166	2057	78	20562811.761	4586	24664	1078	4967	8146	2438147.388	898102.151
Control-49_38	63954	99	5179	68869	106531.942	226	28014	44726	252243.23	148693	1580702.942	7671	11308970.144	655	253369.131	17403	689480.238	13128	234915	2219034.56	387987.35	8768356	101234	2038	3592	29579463	8200	4955	12473329.951	10712	136799	83659	3313989.777	179740156.425	36261740.996	107886	658167	1419772.551	810966.718	2295	433	36625881.927	7746	24084	1482	3941	5535	8083393.991	1446790.954
Control-50_39	54097	238	3330	27044	104629.107	133	17721	39919	170810.653	108717	527526.291	10059	4632620.173	449	341196.617	17289	879830.199	22433	192301	1247329.929	394507.87	8471210	72359	1321	2845	19935712	7660	3505	7839584.659	4526	210660	110910	3813688.886	125696004.438	28806256.441	144893	741825	1578576.183	968356.329	2688	579	28310671.615	8098	22652	2311	4732	9042	4795807.553	904360.805
Control-51_40	73852	341	3713	47371	49027.271	129	119468	45992	105616.317	36146	594486.656	11595	8324991.77	489	257696.267	14035	294289.285	16974	457487	2960522.855	464571.576	11161806	23587	1673	3843	40880310	8134	3019	16817060.432	9544	138217	91143	2184449.245	66933410.281	44546211.858	204627	558900	1514694.206	667003.267	1797	313	35051371.834	6674	23163	831	3930	4935	634738.674	253035.474
Moderate-68_45	59533	482	8680	195096	110653.475	293	2327	49670	100566.47	384393	1238745.19	5866	4342249.091	497	1832591.435	45936	69610.361	29178	84378	2462607.545	1152414.081	6099398	256493	21074	3678	8227647	6631	6699	13854190.544	6449	226793	92659	4479007.263	109849450.943	27930781.88	44919	430311	1243615.316	994963.808	2037	113	61384732.344	7119	31644	962	5162	5916	8010422.739	2332735.443
Control-53_41	78091	266	8583	31929	92087.774	147	2639	48676	125348.487	28943	1808219.068	7510	3145398.819	383	446053.037	14913	301562.983	8719	368659	3392504.27	514841.402	9367678	17621	1271	3076	36577774	8382	5096	16482977.488	3244	144944	100080	2721945.148	83431729.666	32064404.516	88554	564721	1500506.06	1410205.431	2455	270	57550286.828	7992	35270	1756	4584	3322	1219079.311	648989.693
Control-57_42	54132	283	8877	17386	61177.177	149	3448	41247	312988.192	22559	901033.482	9184	8093605.16	384	217396.17	27232	361171.938	13637	576929	1828205.316	411930.689	9244396	19605	700	3315	46943411	8016	4323	9535435.504	7781	184620	107569	3365177.86	117487549.206	35496055.44	128199	497114	1300988.005	726644.349	2421	437	42866114.777	6639	26726	1293	5093	12294	3431118.247	1067187.122
Control-58_43	69735	199	3322	47999	60283.452	170	2374	42817	185608.945	211568	811573.261	10463	4483069.442	236	426541.007	41629	145038.154	30505	768224	1375058.753	355279.397	8805622	143501	4269	3500	15669884	8383	5585	7572049.695	5578	306435	91635	5087331.75	278110473.146	28836219.814	71953	566976	1504722.066	2342270.805	1968	104	32501061.95	6601	26550	3468	4773	9445	76778582.522	10052704.153
Mild-67_44	69643	250	5362	55725	126750.695	192	3237	45441	132070.489	95541	1593691.957	7598	9765872.008	475	151550.421	43537	129462.386	34867	476755	1532685.365	394787.38	8360713	62176	1660	3552	25587168	8879	5693	9721792.15	10694	203030	120740	4115898.118	126789786.28	29239818.315	155889	306926	1810406.643	1156884.363	1976	78	34111616.833	7506	27476	1197	4487	4794	7299012.661	1412739.858
Control-70_46	57890	557	3922	75429	278625.125	332	20190	48542	191678.872	331764	3472065.761	15007	9248211.648	783	1028674.263	38909	682844.589	33029	335541	1622889.278	662729.179	15469461	227090	3438	2952	39090253	6887	3572	8825610.14	8021	337376	221731	2013916.808	229622668.673	29049072.058	148353	1120105	2050712.292	445960.311	1882	511	38250242.862	6010	20706	1136	4655	5249	15390606.081	4748460.025
Mild-79_47	53223	158	3785	34438	109226.651	207	4736	40527	946645.141	31053	1036920.533	9248	5069089.94	220	188819.888	16370	735580.544	8111	808061	1613410.794	342607.644	10282470	28596	1484	2779	24892741	7140	2938	9720696.062	6175	155331	100042	1634862.746	31338482.364	23800596.81	366127	347955	1382812.129	461733.958	1987	120	37766616.934	5158	33244	1551	4451	5389	5605060.07	1326039.75
Control-91_48	56153	252	5004	46973	110347.633	243	2576	39128	267748.964	24242	636064.986	11768	9922689.096	364	357858.965	18901	192807.293	14481	816703	2024169.065	897607.423	15003505	18546	622	3452	45831573	8334	4010	11509172.743	11082	404321	171244	3408194.852	113495513.48	40779882.912	398476	1373825	1459507.95	1157751.883	2161	174	31113245.77	8856	23571	839	4122	4782	2887417.946	944717.624
Control-100_49	90239	157	5055	104706	63572.771	363	4258	43829	140585.181	97447	1288880.922	13339	917361.836	200	203631.395	8030	309351.349	4462	331990	2263153.173	1493540.916	15780058	67056	3150	4493	41596653	9254	2880	13107797.706	2362	159673	68024	2791722.724	67677695.911	37473749.136	185055	618994	1529919.19	983056.843	1615	413	52677142.946	5453	30237	775	3637	4503	1684118.863	1295450.788
Control-101_50	86445	631	7405	81091	78343.259	252	5268	42204	307905.445	345017	661842.445	12060	13163616.323	273	520467.796	40941	78786.644	18007	419955	1720247.933	575780.878	12409168	235327	20463	5952	16382664	8397	6391	9143251.744	9267	249490	142775	4328765.73	89615496.68	24512342.821	95789	627652	1502136.736	1132937.413	2660	144	57940370.664	12316	27327	1716	4673	5567	4493596.565	3469966.211
Control-102_51	52955	333	4033	53136	83307.307	123	2213	41410	192322.783	24771	534996.743	11792	5797005.636	488	322639.58	46505	569324.787	30721	424393	2224607.629	560848.748	9284811	19957	1520	3386	30235442	7886	4322	10436943.248	5810	331834	115466	2046023.108	66410244.524	26530958.103	78379	345147	2440128.527	649407.222	1689	92	36679009.957	5721	33513	541	3971	4596	2275996.801	408009.182
Control-103_52	43359	294	24825	31309	NA	455	7229	41250	293298.404	68387	3423793.751	6454	718104.483	362	49482.819	15318	9264264.734	5903	273913	1089399.306	321102.151	8952730	104278	826	2255	25544710	7165	3142	6208992.022	1485	304055	215868	3769002.535	72665936.285	25844312.518	134068	363392	1462923.572	866885.957	2426	81	79121756.034	8813	26857	2692	14722	5465	2554293.859	641709.923
Control-104_53	72206	290	6652	58906	203764.832	264	5866	49368	455582.264	170291	710148.185	10338	9442645.028	603	318748.388	46045	138055.753	30448	256454	2098755.324	832372.589	13617184	114158	4235	3712	37269108	8334	4011	11019373.861	9593	432028	185099	3869565.03	102391056.108	35386010.036	194456	412022	1689005.094	879685.714	1901	117	46505589.914	4069	30608	4467	4213	5312	10530387.823	1906450.504
Control-105_54	113398	448	5573	79147	144623.098	327	26680	58163	797271.024	265010	960322.768	9481	11209630.546	1349	987260.011	25464	352673.822	18024	264603	2073162.382	738349.135	13425441	181367	5594	3906	65904154	8555	5011	10749680.004	10112	260264	176347	4683638.303	126185549.946	26364501.317	164609	783362	1778978.699	844469.664	2463	161	32779081.343	9117	19505	1588	4077	1643	12184656.983	1996590.898
Control-106_55	185098	561	5345	39656	256285.211	359	43489	45638	407514.228	19553	963461.695	12297	34439020.86	853	2417816.543	37886	314145.235	41081	655987	2579417.776	1032426.985	25967169	13220	385	3939	71085286	9732	7280	12673701.853	27562	459543	301716	10648535.502	286510610.584	54669291.752	249683	4059323	1708599.212	2834609	2286	634	49134207.308	5947	25432	2370	5893	4138	25114364.232	5852395.638
Control-107_56	128590	253	8382	75875	111127.849	135	7785	45803	183120.277	253354	640764.252	10397	10450154.781	250	511598.878	31000	677420.613	19078	826903	1983601.459	501282.78	20113231	173644	4730	3514	67771943	8181	5990	11904377.989	12242	251410	140663	2088528.756	77334564.004	34833018.638	183837	529515	1617284.8	779383.532	2054	149	66925384.793	5606	29776	1802	4535	5883	31115663.185	20726654.785
Control-109_57	80237	267	52548	264030	172811.056	513	11583	61697	241046.696	703110	1537031.486	10473	1557131.329	717	4118938.239	27643	155181.231	15009	253395	4106497.212	558549.839	14136622	488804	36273	3159	38023704	8716	3292	23426470.276	2367	261967	138408	3413525.096	146484506.24	28288721.064	100191	719899	1649902.495	866458.777	2513	134	68818763.161	12075	30997	850	5180	6111	26221789.382	2856485.146
Control-111_58	134455	352	8852	58887	98914.283	181	8078	43374	192322.074	24212	857188.991	11118	5365644.594	406	465385.665	18210	331355.161	8215	384644	2594523.497	536884.334	12239873	13126	1267	4446	54239393	8306	6383	12324408.158	5027	237909	114508	2175382.655	20897813.04	31223494.145	124419	476537	5161535.225	829149.76	2361	141	35898579.05	4567	30824	676	4461	5164	4791742.201	NA
Control-114_59	107625	394	10457	75985	67040.995	221	3254	45599	127984.712	122419	534748.768	8697	1373875.208	365	392668.242	18699	136616.717	11064	262394	2077634.485	332745.479	7331676	83599	4037	3661	21697592	7710	3666	11351999.055	3282	180671	99287	4003791.31	110809887.08	30478187.657	96740	1139443	1320771.64	1407934.947	2470	139	30378686.864	9593	30934	1251	5507	9300	2306416.316	810834.509
Control-115_60	60916	552	15353	73367	98712.565	315	56723	51517	190902.352	26463	1881548.852	9471	9241714.253	5127	352111.301	42756	524265.685	38487	832608	3419678.279	733386.01	11457708	14929	1245	2873	48449048	8294	4997	16007404.059	10175	114470	123804	3421359.287	125863754.477	27020082.621	194914	572704	1371126.114	1127990.009	3721	631	41894553.029	16118	32972	980	5414	6815	5122164.883	2371777.842
Mild-128_68	69568	794	10658	43930	NA	302	17056	45642	340776.518	45770	1273437.506	5470	19609819.308	1055	229023.96	13157	1261668.473	7804	1442622	3669908.928	861153.762	11429821	23947	1245	3390	64378607	7332	5149	21812936.522	12931	281585	425014	2187046.648	31716960.161	37628987.35	344612	565376	1340884.596	935497.064	2034	139	50586902.848	5953	29616	1070	4742	7400	1602302.549	352450.122
Control-116_61	50887	338	6132	45304	146602.978	146	2046	49486	871058.002	34748	503710.635	11186	6428765.796	375	266884.745	37795	582667.723	23220	259993	2489873.134	365823.306	9313113	20682	784	2766	31694667	7211	3483	11888917.459	6338	143667	91653	2037613.611	72280909.892	37763055.284	110389	280523	1262930.642	537516.84	2453	87	36811866.462	8223	30091	1053	5430	8574	14321003.909	2476819.48
Control-121_62	47436	211	3540	61575	40975.583	167	4683	44000	590694.712	29041	521854.145	10841	3455674.652	854	207958.84	24297	1962467.566	13307	387844	1495431.492	245627.772	9329015	19506	1457	3016	59467875	7558	4367	10345254.857	3916	170337	86683	1841599.417	47327957.731	29874372.133	174272	278034	1756320.364	557043.03	2820	141	36015382.424	7384	29945	2766	6849	16141	4320307.76	874204.098
Control-122_63	85024	142	5217	53864	69551.595	150	3315	44129	325627.955	29885	423481.861	11861	5442003.612	830	206854.652	44648	771395.633	25720	453933	3011513.085	348724.341	10685979	18708	1549	3981	66490021	8744	4843	15159146.098	6784	206115	113035	4294164.937	101794137.018	36681087.251	153302	443320	1526875.37	1827377.199	2295	322	36871975.244	8459	26422	1066	5042	6058	2778946.466	1571929.251
Control-123_64	31492	475	5939	46872	147811.684	134	5583	45770	30691991.974	48535	4800976.115	7496	4027404.155	333	264447.807	39148	662320.573	21546	362333	2053984.172	561645.377	8158648	31672	1577	2842	38337571	7234	5115	10187246.545	3167	143247	226391	12420628.313	112483348.054	28558291.466	133771	289498	2150055.969	3054833.403	2272	198	42987435.284	6773	29592	2980	4753	3373	12688903.188	2091445.914
Control-126_65	38082	615	17668	113218	189988.906	218	59829	54410	509554.446	84769	1060714.294	7206	13996726.819	525	1555628.963	8323	47359.091	2869	76460	2912551.639	942340.306	6847809	55477	1743	3833	17611025	8975	3597	12842654.553	9147	378521	188175	3193263.189	140431126.916	32034208.451	51688	512924	1030405.876	1028794.634	2686	404	31385082.547	4799	31940	1216	4428	7050	7427648.36	2087597.537
Control-127_66	46447	322	3200	22546	169368.68	156	2371	36921	136946.753	45026	534957.065	9316	15634710.58	593	215136.461	9943	241935.773	4711	821235	1284815.236	317198.163	11487528	29977	1237	2719	64643913	8336	2578	6847898.967	12775	247489	178897	2021231.618	62619655.637	31135371.562	146795	382163	1100022.271	525293.985	2026	138	25839260.951	6193	31977	1098	4533	5656	2816349.194	1054468.02
Mild-128_67	112786	659	3746	52901	162882.581	307	74736	46703	155860.038	38933	1573687.736	6474	16035492.512	848	183434.625	25074	529739.981	9396	1538972	4267479.497	738379.425	14533474	20138	1144	4308	69712008	7861	4629	23725604.401	13868	326646	285059	2040184.036	32852092.2	35759920.224	303784	408976	1272221.342	1455919.613	2059	160	67286247.561	6844	31793	638	4209	5316	641465.713	292214.68
Mild-128_69	89948	697	7316	62539	223368.311	271	7924	45383	181830.262	35006	767697.905	7067	17602493.4	789	424427.961	21859	735753.991	10980	1682240	2257718.526	685004.342	9375229	20895	933	3407	49318738	7900	4041	13213781.789	12455	185812	227774	3184881.046	49502216.945	28512750.234	205954	452000	1157728.263	906687.764	2451	174	38896743.466	7790	33787	1114	5156	7729	1789450.478	551125.102
Control-130_70	57384	260	2597	61841	90801.538	105	2445	44276	168342.058	173984	458858.368	9240	1075123.75	196	336363.681	35370	569957.118	16451	242084	1575496.713	443071.533	9983502	118582	4707	2668	25212359	8109	6363	8396907.398	1816	129078	102611	3625676.723	84414988.171	22780371.986	108241	328223	1124914.707	794569.601	2498	141	26252086.941	8314	33784	2128	4936	7086	7741228.72	1193540.066
Control-131_71	43601	353	7010	26152	44934.712	151	1821	43528	176520.271	10413	564966.56	11879	5371309.192	559	407801.76	45005	464322.498	30323	362656	1945275.064	372730.145	11041953	14418	350	1952	55936188	6615	4771	8625402.501	3908	170490	101105	1791455.686	51753596.419	29488348.649	131644	437887	1268475.699	467399.863	2423	108	20653195.739	6281	29551	1216	5553	8326	3365883.238	729843.221
Mild-133_73	69875	261	4017	36851	72747.297	191	12470	48349	158794.488	17731	554550.994	6070	8343887.665	454	223074.898	37847	739103.127	33997	1006727	1514085.954	254365.682	10972982	16337	471	3240	70662991	8026	8611	7253227.067	10227	195351	113557	1576505.775	41315421.485	36082952.579	211778	755322	1209972.995	724340.753	2133	221	25960293.817	6911	27676	769	4956	5881	1547841.963	946721.43
Control-134_74	54442	679	24262	93670	167418.786	455	4560	51856	193382.539	35950	1112972.515	6718	10222865.128	3022	432129.123	13149	329278.858	3793	764268	2249635.346	574979.36	6695862	20493	1010	3472	38280879	7650	4276	11446162.663	8680	250779	186568	2100063.615	55586460.241	28707395.234	69456	302005	957532.782	761820.468	2290	130	24891768.462	6896	35096	1376	5187	6451	3768882.387	2707103.65
Mild-137_75	48920	1237	3830	57145	92806.25	217	3466	42744	170640.71	24632	715719.984	6501	6737491.832	2273	592350.479	50726	236885.331	37454	337833	2395831.986	393320.637	9473654	12978	1168	2827	47786889	8053	4678	13956712.478	7274	285722	211849	2907789.088	101212092.299	33111276.01	251220	359203	1524620.549	1308785.998	2095	161	52628678.366	7963	19998	1541	4753	9787	3652147.827	1611701.412
Control-138_76	67699	219	3853	47430	57727.053	132	1612	42619	323820.777	41547	581894.447	9127	5242938.311	693	190677.766	15473	242474.214	7096	525539	1980951.847	293481.196	9256262	27443	1682	2532	39807533	8653	4711	11052930.12	6316	217591	79712	3115181.392	55088365.586	28743337.164	104047	364510	1488735.414	954486.318	2508	118	27529295.147	5939	29245	1590	5670	9397	2614318.414	1021973.341
Control-139_77	50834	293	2570	55337	83169.488	315	50337	38712	224657.881	72193	1076385.015	8490	12998424.693	305	289755.205	22865	1028495.047	15004	268341	1164211.781	372195.535	11143258	50744	3517	3752	41960003	8771	4812	6422739.025	9860	225432	112672	7803559.31	61829065.132	24384681.66	232407	253915	2061432.329	2112681.698	2338	172	26900285.8	7348	33015	3621	6184	10651	6082887.595	1271001.995
Control-145_78	113304	511	8908	38036	126197.694	157	2390	43545	216663.582	20895	354896.789	7189	7136313.706	886	568542.165	38814	965117.608	19873	255471	2386180.596	368050.764	8110391	17891	976	4031	29173741	7618	5708	9901523.13	7003	773439	259783	1997608.714	39376195.396	23738171.355	80912	525570	1603014.355	560656.932	2756	156	44235383.709	8260	29661	1151	5135	4401	1832322.583	814146.082
Control-147_79	99434	1101	2884	75355	225930.933	210	10798	46762	330428.774	384400	433926.268	9251	10796207.378	506	607164.223	20441	43090.665	11502	519344	1375941.724	780449.012	8697841	261486	9165	2836	34476618	8023	5787	6783007.479	6707	166077	262477	4032934.163	63934312.719	24744474.383	110505	375957	1060308.237	1227104.41	3008	208	43565587.37	6692	30227	1715	5130	7375	7845874.075	1361134.198
Control-148_80	64050	319	12190	40704	NA	231	3427	42863	226903.632	11455	721188.975	10628	10267575.951	821	323606	22640	1808687.282	11800	249463	1900269.789	548625.431	9467804	17619	749	2635	48553734	8277	4149	9850107.046	7075	160947	100242	2770996.567	90876062.333	24654078.73	161622	317767	1435823.856	798408.948	2467	243	38470660.823	6466	28536	1792	6647	9285	75834512.895	5704164.289
Mild-149_81	131060	410	4960	30641	125705.005	189	5059	42356	1154191.828	51455	642194.517	11601	8222485.198	853	477036.557	24799	1027838.561	21687	438567	1974098.53	798894.588	10032552	31931	2287	2997	35920835	8084	5434	10667351.62	7742	343678	296139	2842328.519	41744264.524	32517410.89	136348	446869	2144806.208	1030912.887	2739	225	35901554.819	8475	31989	5090	5519	18936	4014769.985	1530069.769
Control-150_82	48925	556	6127	65364	153257.585	158	5498	46865	1396256.89	102861	2388689.513	10265	6770425.728	474	639078.167	33300	434113.124	21273	294196	2337225.762	551161.181	8042645	67943	4892	4230	34298417	6971	5498	8961143.251	7282	210550	185477	3934500.37	71170606.548	24241924.855	80390	389322	1724197.516	1067083.276	2393	189	46963858.08	7502	22830	3031	4909	4119	11679108.596	1445312.209
Control-152_84	60317	233	4671	42941	61166.696	128	3048	42355	157889.745	99489	455996.645	12831	7766061.757	403	172512.007	30218	1456652.463	22936	569517	1662377.268	363456.708	8762189	66556	1930	2888	28397759	7369	5111	9375380.188	7937	333493	126329	3296587.169	80843840.124	25966783.183	82710	387224	1352686.5	854794.022	2434	129	34243424.378	7099	26081	948	5581	4138	8027828.326	2052971.135
Control-153_85	44048	189	4900	60389	27115.964	164	7161	46951	235588.742	32008	692817.143	11671	3602853.454	1093	162989.019	13117	94322.134	10289	541148	2180063.481	427085.994	9345352	20893	1305	2415	59138952	9674	3706	10637878.254	3201	229417	158619	3647207.457	61419043.525	25689386.309	66499	349007	1024121.265	1134091.196	2323	239	45514316.194	5751	30143	1692	4396	5630	2408010.342	689852.277
Control-154_86	78968	279	6214	34765	51344.664	209	5366	45587	263613.189	23137	580081.764	11915	16562862.412	724	146025.868	29314	1739174.969	22458	750157	2710267.413	426145.658	12496084	15532	703	3928	65917166	7541	5316	13890821.827	16579	219268	108001	2088426.526	66192358.362	35761092.556	167661	419811	1441691.637	599279.431	2397	233	43473743.25	7005	30067	640	4595	3255	8907906.635	2694404.91
Control-155_87	117525	375	3953	28944	161835.045	151	7107	40830	299789.148	28295	781627.552	8390	15230816.396	376	816898.376	24680	1103567.589	20892	266684	1907284.416	748926.1	9784632	17253	1575	4975	46871731	6552	3152	9139965.343	10395	257201	148065	2078770.052	30852062.805	25514461.917	91315	281166	1643164.379	708251.162	2267	145	36303671.574	4082	37542	3134	4697	10719	6241739.427	985368.746
Control-156_88	66086	285	13696	107799	42891.144	254	5535	53996	193425.094	37332	664269.297	11262	2946250.897	781	304321.349	31568	826020.224	20036	362318	3083031.108	448261.946	10684099	21760	1444	1833	50043307	7343	5182	14129908.806	3500	328546	89231	2920541.499	109747669.975	31726081.755	102601	389701	1046109.431	762578.86	2227	178	44653913.017	8459	36690	1601	4595	5802	7173639.277	1697774.795
Control-157_89	48889	86	11200	140280	65123.249	193	34894	51581	122953.011	167204	3352465.243	7457	1183539.733	311	285371.001	14159	122757.132	5663	262628	1376000.614	360289.305	8121224	109588	3269	2725	42332405	7133	5407	6352866.004	2374	177147	76959	4655984.736	191041716.107	32822811.779	80110	622384	967096.253	1254658.735	2491	185	48700778.519	9721	37017	2976	4232	3201	6369767.444	1814536.407
Control-158_90	96091	284	16502	41284	110235.794	200	4437	45400	3508526.337	23156	678142.992	9542	2209238.523	725	314801.289	28379	920761.932	26757	234521	2487745.966	539689.843	10734360	21136	1122	2363	44619236	7253	3557	13271083.516	2146	244624	132962	2568530.619	41838154.55	28202569.538	174584	375643	1897425.111	709409.162	2751	202	48302477.574	12810	34195	1775	5008	6975	4218370.965	721540.728
Control-159_91	90439	853	14282	214447	169410.587	211	114254	55956	449040.326	78392	1084265.76	16201	972660.015	1083	1396465.838	17655	89655.013	9602	212433	3142264.793	761040.015	6986297	49273	2418	5075	55930475	10023	4665	14305656.147	1434	372288	275795	4995301.784	83808672.211	39133484.027	67568	444172	1242096.277	1643946.035	2158	285	41742266.955	8060	28928	1841	4156	3129	9127608.208	3571449.539
Control-160_92	98079	398	10859	68089	171265.671	255	6859	43903	268443.677	50164	779604.436	9914	6018942.03	302	912671.804	4062	735758.837	744	479494	2713636.648	652366.728	13276780	33204	1410	4151	50245329	8293	2379	13431919.563	6503	348167	151000	2602618.616	40731684.305	23568208.178	29767	368639	1793517.678	830664.364	2327	160	65882508.128	9065	32348	1121	4281	5098	6913069.972	2430929.488
Control-164_94	26049	398	2284	48158	128571.725	252	6794	42250	165874.736	24594	469619.475	6311	6997455.587	1605	369294.544	17377	131092.101	18990	208731	1447797.278	482119.722	4882926	18031	1054	2729	7005685	5014	4914	8117232.631	5043	134296	88645	2346920.669	40436617.128	22361430.355	16798	108147	2113478.739	976662.996	2558	164	26105490.232	5346	28395	4112	4851	8516	2814037.305	873228.434
Control-165_95	48129	491	29270	105393	220609.514	375	3957	49726	148783.803	123734	730024.84	6672	2110395.656	519	737688.068	9037	30199.352	4735	88717	1458847.422	1019068.249	5018450	84785	5763	3457	8055449	8487	2897	7505211.645	1908	324383	211836	5033288.354	84068139.209	33759179.755	23512	272980	940296.437	938571.909	2259	143	46178075.342	5335	30061	2654	4638	4254	7272583.741	2234080.178
Control-166_96	74598	187	6381	86266	138979.845	215	60080	47382	150960.481	25790	552182.759	17976	3074400.888	732	452800.976	13839	246095.746	29219	152006	2370192.445	320059.305	7712078	21559	1777	3633	41206783	8090	3221	12122789.051	3779	172093	89576	5311061.656	88435242.216	34931911.912	52801	462317	895326.202	1930077.298	2459	284	31193850.948	7387	29948	662	4819	3132	1794541.817	558717.924
Control-167_97	55089	398	8698	106316	88959.905	188	5099	55853	488256.487	48507	539140.98	10456	2099194.422	1065	236540.274	32948	55938.418	18849	509499	2880700.553	340254.671	8682303	28926	1080	2316	32624874	7278	5924	12145510.422	2467	119618	114358	2280049.652	57305203.567	31708381.774	92598	318980	1032650.836	588064.125	2420	154	21302917.385	6480	28386	1315	4781	4914	33645016.74	3849717.798
Control-168_98	56525	328	20598	89696	138647.537	892	16693	46665	125816.125	136759	1246017.262	11792	1352572.845	658	923039.128	27308	25532.659	15623	421132	1101825.92	950097.023	6639359	92741	4278	2851	12730303	7364	5432	5352927.625	1820	411223	185341	6128173.615	66555247.145	17593889.231	44678	429528	1351115.995	2229651.3	2226	305	16509241.595	6329	35961	1686	4465	2950	9324178.16	3739219.469
Control-169_99	66767	253	8823	40937	125627.703	119	6246	44462	361908.639	10559	576211.203	9109	3806397.57	630	410951.605	29052	536349.002	47780	293790	1782056.663	432309.851	8466212	17908	605	2528	37806131	6106	4789	8064616.67	3877	166783	111965	2569549.33	38770546.63	25141091.473	90493	869604	1446158.084	822468.024	2283	298	49315219.816	5183	24856	1244	3570	2788	6760211.482	1796867.742
Control-170_100	51668	524	8834	60138	90547.073	163	6366	52206	316571.845	30847	1322772.375	8772	8314264.97	879	218717.401	19874	866411.794	26487	463897	2402041.995	431638.179	9437024	23397	1534	2750	50715730	7156	4287	12872248.352	10166	187599	113755	2550034.875	89590240.058	28357542.428	134179	288602	1612013.379	928533.051	1962	207	35529560.711	6979	25909	1024	3923	2687	4819093.354	3860309.08
Control-171_101	101236	388	4843	22854	112573.799	192	5249	44862	285596.519	13338	594647.634	12205	5150738.98	1062	223618.955	41456	74751.721	33652	325390	1972889.113	486935.7	10857883	19467	949	4894	38775109	7223	5957	8950437.435	5428	216638	158872	2351384.132	70074178.892	33471624.66	74706	543952	1395226.398	659558.749	2458	267	38378110.854	7643	26205	2666	4859	4420	1701569.881	491771.463
Moderate-173_103	52005	375	5407	43895	99280.231	261	3991	45325	255092.371	22879	722943.076	5604	6071756.073	2980	253888.714	27831	49802.463	34402	407143	2696718.248	865833.94	11080672	19127	745	5041	35808217	6449	6501	13067553.389	5421	218967	134613	4701253.663	108686477.329	23019592.938	48032	326735	2135261.626	2192532.709	2480	489	55364248.507	7698	31031	1433	5104	11976	1115747.906	639178.22
Moderate-173_104	53555	303	3565	32449	36691.924	179	4027	40785	355362.746	14112	400503.816	11419	3578235.676	391	272516.791	31371	33395.846	44835	391841	1887004.811	829617.116	11481488	22269	681	3751	32807531	7457	6079	9606418.835	5082	220159	180524	2091119.815	61006215.813	23593580.084	98454	458786	1495694.949	829459.778	4372	162	46325415.607	7862	29580	1448	5470	3746	939410.13	530327.508
Control-174_105	83813	225	10755	72373	75991.344	149	6261	49790	518387.961	116590	730931.859	13168	2239794.16	579	102059.982	19721	376125.811	10560	233452	2349766.586	313600.675	12325044	79023	3525	3278	42582505	7542	5581	11794967.77	3297	201784	98058	5037555.509	96613917.433	38739643.435	58184	426309	1146621.661	1141715.915	2535	123	38458779.077	6439	26326	862	5608	5321	5103886.434	2110299.519
Moderate-177_109	67669	1052	2879	63016	127244.543	400	16124	37030	125699.168	419671	755670.85	10478	11151.948	407	840521.775	30562	33737.32	14806	298394	1121743.358	1244393.491	10700231	285893	11253	4602	23311860	7700	4512	7056066.706	1030	275058	174936	5221883.53	111520133.835	19153652.481	89144	371064	1109707.202	1504837.067	2061	387	33358485.876	7008	30785	2737	4430	3707	5968356.278	1554360.027
Control-175_106	51732	604	11531	63022	NA	172	47980	46650	604276.284	149475	749548.175	11044	1486560.139	1009	309607.986	20211	100097.368	15896	326785	1789917.382	482465.35	9860008	100895	3973	2365	44436155	7993	8574	10099495.389	2008	165769	167661	4886075.209	129820945.956	30501006.74	129612	607132	3140310.141	1276931.371	3707	255	29414349.227	8930	23940	839	5892	4993	10880761.802	3730162.236
Moderate-177_108	49801	740	4175	77527	123070.625	835	25211	43183	141030.68	194360	1162243.203	9238	54249.47	335	1175710.565	17443	35836.746	8303	398567	1495918.406	1110040.616	11470224	132525	5188	3630	28645857	7914	3699	10257490.174	1582	210294	127860	2392549.718	59805825.832	26641191.356	145723	349715	1090595.624	582703.113	2989	190	43172236.728	8756	28902	484	4551	2829	5351143.229	1667033.815
Control-176_107	57682	425	6857	28269	157487.075	138	2990	39588	439939.374	18998	479484.831	5510	9905688.863	745	1644936.361	27603	884168.051	30488	227189	2426597.247	483384.151	9423137	17338	998	3187	21104444	6820	4712	14892846.408	7015	217484	142194	2553771.725	34457889.266	34226352.431	36021	188484	1880305.69	1183434.302	2844	248	37214675.784	8919	26248	653	5435	3759	2400922.903	846777.769
Moderate-177_110	101613	1586	5419	106658	NA	318	15568	48549	6211760.389	33817	1487956.147	13635	11098807.402	986	475968.215	32719	272904.628	26393	451391	1912475.583	678914.635	11055197	94095	904	3849	31063336	8021	7081	10196313.214	9721	371021	260566	14126395.663	36553837.376	23011820.724	107425	467543	2315618.268	4233268.377	2271	275	31734208.141	7242	31812	979	5635	4372	2008703.349	583069.494
Control-178_111	121368	587	13695	60756	117017.298	248	4699	51335	154498.533	204231	872330.026	9560	4571121.418	192	286876.075	12887	2216890.261	9198	358831	2423890.349	644881.243	12412387	139581	6043	4919	30954401	7266	2970	10475668.499	5924	479509	276217	4639778.41	78857577.228	33789488.773	140082	710626	1141538.492	1052351.475	2513	157	34822412.695	11530	29436	1025	5943	4785	5006316.428	1130149.759
Control-179_112	62309	320	5001	41259	72017.097	201	3623	51014	87471.674	19181	549784.053	7687	711835.617	424	379866.67	29524	40008.741	31547	457758	3105087.942	567896.626	8064206	17234	960	2695	33639643	7172	4587	10542575.667	1016	252131	132141	1824272.751	52954278.577	32413863.332	87224	727111	1614798.536	470433.617	2036	131	38875357.655	9408	26092	730	4414	3746	3141576.904	1135693.514
Control-180_113	87155	197	7342	79613	84092.427	157	4838	56032	216458.256	40143	805643.685	10613	5242007.827	391	218157.887	25947	420513.569	17147	968235	2364824.866	397581.843	11027605	25796	1336	2797	46022203	7958	4159	10088171.651	5595	149848	95871	4148995.285	99896466.825	28257997.611	158944	317678	1092899.245	833330.591	2002	111	35775651.626	4555	27484	1184	5983	5702	15465432.647	3617268.469
Control-182_114	69534	189	6330	55854	107983.573	221	3309	51655	506843.147	73842	525649.664	10755	3255876.453	604	393098.926	25626	735803.306	19203	329152	1806579.741	325765.577	11144754	49255	1682	2295	33793018	7261	3900	10212095.384	4179	172627	91823	4639203.519	81483806.394	30953223.652	127166	276134	1291433.03	1609673.776	2399	188	34652647.598	8827	27312	1271	5704	4652	5568517.831	2004360.191
Control-184_115	81109	424	12720	57527	59821.304	203	3670	50072	353830.501	106558	615465.508	15762	2865945.559	669	250988.796	19535	662276.249	9667	301588	1701993.212	468984.619	10491918	71825	2308	3169	35803651	6000	2731	9348263.54	3512	191068	92188	2654193.918	88281129.783	20027029.802	42109	448499	1218663.269	597883.673	2345	161	27373249.059	10628	33811	1122	5578	4936	9106311.258	1767227.845
Control-185_116	107832	388	6773	37419	139023.935	119	4388	46495	207834.479	27038	1018853.578	10047	13763923.136	375	381052.849	39957	1142046.771	33823	372160	2491867.695	346016.153	11632771	17078	601	4521	42452868	6329	4805	11303470.125	15078	227401	124944	1686294.634	36199005.572	34412197.574	102665	440026	1154856.489	604827.056	2243	105	32937378.038	7395	28408	1068	5800	4649	16882908.282	5249615.092
Control-187_117	29174	196	6484	39024	102357.391	248	2024	50740	477000.354	20960	872937.785	4538	7813213.939	1053	247830.451	48492	2160955.362	27013	59564	2219516.21	324415.783	2702875	18806	1077	1847	2956980	3407	5090	11911046.808	3708	57721	45826	1698041.618	31930712.476	39333538.956	16728	106843	2155261.303	487365.888	1800	140	40389028.392	8544	29399	679	4916	3299	5310640.248	1813027.375
Control-188_118	73678	353	8094	39308	98281.18	215	2901	48486	456406.385	17144	626593.995	9711	4689196.029	1169	211985.981	41801	1010552.517	46358	529026	2020277.409	394152.628	8772572	23235	1441	2314	41209356	7374	4927	8726700.864	5658	234256	139850	1653753.94	39503894.422	35265953.779	167386	540758	1409508.212	440693.183	1843	264	35238708.16	9014	25158	774	4873	2530	1164387.309	560412.75
Control-189_119	69674	200	5576	87042	80021.354	275	16787	50997	1020106.639	102675	606258.58	11277	3008059.464	1004	136012.556	18595	2855048.225	15566	480124	1625552.257	353562.996	7712834	67651	2799	2108	38301424	6590	4379	9311798.804	8129	159373	110600	4511674.674	74049584	25753466.266	199464	302808	1236282.593	1072960.924	1860	150	37475138.064	7866	27400	2931	5839	10303	30325511.469	5599704.487
Control-190_120	114742	415	14686	49548	95192.337	379	4603	50146	674937.837	45757	872181.114	11021	11133690.512	1946	1030832.27	39163	1575057.737	31129	215333	1834509.126	402902.155	10094586	27466	1865	4394	54405383	6826	3493	8421267.727	9540	263538	126475	2123616.169	44427589.524	23103040.02	74484	414216	1154231.227	598793.392	2206	249	31326125.57	10237	34596	4818	7633	28129	5007543.43	816973.624
Control-192_121	64666	387	6444	59156	89527.643	294	3433	53631	279207.222	20759	677822.927	11755	6654761.944	2530	240546.445	29533	143835.842	25720	221909	2265990.459	380448.873	8070405	16275	1003	2305	24536633	6679	3926	10210045.22	5579	151953	87973	4944381.225	116194982.656	30759626.568	70882	293267	1310088.114	1409074.511	2177	140	41144156.414	7978	27672	1500	5257	6167	7683797.725	1731293.2
Control-194_123	96897	315	3612	57992	87719.954	133	2508	41468	87566.019	96020	347418.715	12563	6577520.759	475	867825.874	27523	30210.341	26808	215465	3052337.435	465422.477	8711855	63678	5173	2261	30472375	7201	4339	17879710.65	2669	210738	164474	3028296.331	79298376.58	25144390.914	84378	554742	1235549.727	1283212.87	2145	146	31029131.517	6828	30453	34522	5937	120467	2570351.02	761294.505
Mild-195_124	100865	314	9434	34811	141120.834	191	6109	37314	231714.299	71382	354142.793	14414	1444052.775	172	309868.686	17454	216048.676	14188	215781	1679865.744	542020.463	13002225	47793	2582	2513	30737881	7743	3343	10564153.448	5457	183978	84863	2679859.381	64082615.397	47754275.338	75198	593816	982599.284	811318.743	2079	192	46064210.389	5727	29308	1329	5334	4811	6628522.564	2588225.311
Severe-197_125	87159	273	4901	92581	56463.085	320	8088	49674	133658.368	36031	530439.372	13071	6142092.914	2887	451991.403	22233	646480.627	11395	268180	1939772.508	793924.9	10754561	22963	1106	3033	30980645	6985	3083	10135999.833	3909	299389	180128	2668700.136	65773139.505	20053049.984	85406	450720	1086668.26	711776.135	2422	308	30505323.256	11801	28713	1218	6221	5213	5440764.693	1517751.327
Moderate-201_128	111821	1089	5647	90988	272965.9	297	4978	45965	121610.385	103281	806415.389	10979	12461719.154	667	787831.367	23058	583001.84	14755	290998	1930803.797	1057265.181	9381098	69775	3624	3303	29349703	7433	5395	11152870.308	10271	356361	240399	3763019.853	86816180.266	23361030.744	73395	523531	1657343.67	1158115.637	2311	220	33507474.728	6889	29769	1226	5981	5332	6991941.701	1685101.897
Control-198_126	77508	311	39125	120590	168607.836	357	18464	46697	123554.41	273327	568556.975	11897	3287808.311	832	1066473.878	17455	198365.606	31603	214083	1561527.973	450148.067	6720618	193432	9606	4379	36178433	6819	2600	9115643.537	5776	360858	186066	6102987.678	169081240.836	30784074.175	53965	308535	1107709.942	1292560.115	2176	176	39575496.507	8149	29647	1424	5760	4982	13400789.261	6114366.891
Moderate-201_129	95966	805	5133	38759	130350.69	389	4604	40537	NA	46416	113403.888	11950	3728461.402	867	73379.029	23281	113338.426	9154	525997	349664.065	120888.187	12122599	30898	1512	4685	33113791	7557	3057	2736360.683	4092	309282	121694	1586494.243	15927506.093	7037543.129	71469	939090	780351.173	459040.454	2379	233	8917017.092	7297	30936	1705	5270	5690	972636.859	315251.205
Mild-203_130	95151	503	12947	105906	122642.016	314	28591	47192	40080.465	178595	141844.12	13891	702094.535	2619	34294.588	21026	246927.829	18738	1067305	660970.693	215396.747	9765116	121812	2796	2836	58106832	6814	4577	4818010.06	4612	247591	134035	1618751.567	31578366.569	18883187.591	104210	357816	641327.131	361568.682	2427	809	12339200.822	9071	28610	2765	5543	5528	3907345.275	1046387.836
Control-204_131	90207	201	14156	58510	113061.951	524	3353	50670	208129.233	19828	4769914.07	12069	4760178.046	1785	196500.53	29452	138166.392	14699	236401	2389742.066	647243.275	10407128	20458	767	2318	18611283	7243	7352	8994027.803	5167	146757	121741	1839172.541	51796374.893	38119843.103	81275	387017	1938190.102	568526.151	1854	176	41237577.369	6146	27038	1137	4444	3187	2589011.821	1764790.8
Control-205_132	81949	434	6470	69622	106156.464	262	3614	49148	269466.226	159637	624919.622	11586	5172193.168	1927	305770.048	31551	302063.474	40105	862849	2050053.961	612112.141	9742013	107789	5461	2231	41487760	6524	4251	11199039.851	1654	197037	114755	3660794.439	88800099.767	32542262.333	75725	340447	1588329.223	839975.385	2510	230	23741684.938	13331	25628	3791	7590	13511	48989285.994	4567628.269
Control-206_133	77979	271	18816	44299	NA	305	4153	46318	22497310.571	20732	747708.974	8345	757589.378	4230	251342.928	19038	140610.056	13048	1000841	2425145.69	519990.607	9823236	25657	1148	2917	29359329	7310	2656	8909377.039	5333	311802	207790	3567265.51	87133827.534	32131659.725	84849	304919	1543427.537	1476059.394	2238	414	40381707.859	9512	28547	2768	5490	12171	4573878.292	1210449.04
Control-208_135	89926	222	8908	85814	131221.337	255	3577	50636	338675.475	15068	1549247.276	9049	11248063.564	4153	1066938.853	25004	81184.698	22752	246969	2047595.278	521620.127	9552784	17968	773	2413	41754011	7356	4862	9618264.041	4031	188621	97776	4585949.79	111795101.262	47493705.78	97758	310145	1357100.035	1355472.069	1897	203	65397169.799	4709	27151	1083	5856	5071	8541839.817	2271749.077
Control-209_136	97357	509	10090	56742	119324.246	162	4956	51827	81472.253	28647	209209.727	10061	2470646.684	6216	156911.16	27879	235657.988	34240	332094	1577800.079	310844.631	10433492	21959	660	2834	35515010	6276	3919	7942885.551	6110	174775	96567	1647796.249	53464781.792	29242724.223	110233	934219	870870.037	406451.192	2139	266	22200500.198	6924	26841	1742	5491	4278	4216217.038	1082362.262
Control-210_137	81244	286	8129	27169	140823.224	325	3534	40533	209955.049	15545	736638.667	9696	5355327.925	2689	343648.587	30332	1826832.955	33336	427791	1830596.222	439999.529	9483990	19533	1101	1774	36380081	7029	3896	8291292.242	4280	542205	145125	1859010.913	45489819.378	24851001.492	78769	239571	1438869.612	593227.129	2227	596	40414411.119	7544	23840	4338	6290	10545	4060793.259	905518.932
Control-211_138	109599	594	10361	53188	NA	321	3867	44951	616496930.425	154601	875216.382	9392	7692972.245	11514	305654.601	36017	289306.77	23171	180296	1871509.685	374648.147	9536197	102848	7241	3077	30728005	6447	4829	7607627.385	6357	321046	198956	5224509.549	97969220.575	16881670.786	118366	530063	1096044.687	1609771.422	2248	241	33781522.891	7690	26908	10875	6107	14548	13907935.9	1757234.108
Control-212_139	104772	347	17039	71458	82099.309	420	4521	50671	394152.195	31508	894725.56	9433	12823275.855	5697	422799.198	14685	461460.798	12351	443999	3786266.598	472321.132	9835392	18458	1752	3657	27069947	6394	3285	21092300.505	8163	187654	108853	2889391.443	87841497.828	27594614.848	61430	493570	1375572.322	845585.084	2123	262	41122695.332	9005	27558	1236	4972	4242	10845082.592	3488530.046
Control-213_140	21011	583	10110	72942	59976.661	204	5040	44176	144712.129	93975	1023574.122	5848	85043.604	543	2358997.57	7748	36126.851	4492	96539	1264953.496	457631.921	6374157	63073	2595	2773	9594092	4964	3963	6313010.597	1200	229346	126381	3116034.415	199036198.82	25173210.973	11220	278971	1062332.057	712638.367	1974	226	42182035.067	6314	25520	2256	5327	7404	30572175.13	5589681.175
Control-214_141	101493	277	6271	50824	71965.808	261	4252	48420	203093.135	84915	701185.046	11181	5810036.773	3390	294867.016	20500	497055.801	19470	450700	1817429.626	484565.647	11430043	57179	2900	2801	31270918	6764	4049	9778669.377	4909	227513	144886	4680525.441	97424839.988	22174901.936	83363	541938	1179828.495	2124624.56	2094	233	38130911.111	10091	26878	1413	4859	4368	6368903.727	1525946.459
Control-215_142	117059	531	9046	80156	105686.324	257	6597	45304	147919.098	32872	777241.907	11768	2590627.02	592	340228.208	25064	337869.817	14637	264772	1915354.66	539090.945	8998662	18888	1516	3172	39395689	6825	3649	10298696.362	4048	265330	147036	4092360.29	70548838.848	34556422.127	104789	1040579	1639366.054	1721544.848	2417	267	31205474.638	8857	26975	2688	5585	4248	7131980.579	1450019.082
Moderate-462_187	76921	373	6389	80714	NA	321	4391	43331	243723.469	28564	1133886.762	15220	14211180.864	1682	317657.965	69063	78510.283	40280	670684	2747819.559	642510.623	11583791	22126	815	5487	57229596	7004	6334	14984584.519	16377	466507	188263	3712763.485	54359658.17	20408777.792	112109	274980	1765189.639	2784630.823	2686	473	38863271.016	6635	43383	2482	5894	5303	3556438.48	1217447.293
Control-216_143	87656	231	13235	98870	84797.061	152	2270	47888	127217.396	144701	1696167.688	12623	4352907.98	5431	203792.879	37304	602616.065	27784	288112	1839494.513	392863.076	11389013	92438	3717	2536	26099100	6843	5512	10668522.86	5338	195741	93624	2580574.361	117277489.362	26407314.549	93608	542547	2090736.055	675324.667	2530	133	41271395.248	11517	26073	1231	5140	6724	8903335.463	1857550.377
Control-217_144	87380	270	6956	79363	129730.457	114	2964	48490	274248.073	79829	382359.489	11091	3620957.291	820	282402.405	31209	357036.851	19768	157478	1901492.613	430761.87	8600234	52979	2926	2241	24651534	6886	5197	9009691.246	3693	235992	109142	3250894.305	60970817.995	31276321.57	67804	422867	1089567.807	997210.978	2301	175	43694154.854	7091	31478	2934	5850	8485	6307819.25	1030164.564
Moderate-258_168	118654	263	7245	111822	74576.588	719	28692	47407	87574.018	44008	888697.904	17734	10633.695	3327	522878.644	28101	34862.371	9288	180051	1877586.537	956497.61	12355061	26352	1245	2633	26226113	6339	3251	11561070.525	1156	178403	109466	5275645.816	120347217.842	18635017.816	50275	765744	1181324.92	1315400.661	2569	470	32657102.852	14863	34263	8701	6538	16981	2230451.379	841044.234
Control-219_145	95123	377	13407	60128	129854.685	400	5887	48733	151003.989	25568	950023.457	12978	9596991.584	619	487082.343	11422	687500.642	9929	540155	1543622.793	732815.648	8459909	19558	1058	3017	36107416	6893	2884	7665671.827	8164	279460	148762	5936003.448	42142724.959	24530775.722	51233	742744	1069227.446	1375377.498	2659	163	42038640.439	8050	26163	2069	6790	6894	15182662.56	3535555.166
Severe-467_190	153919	199	3270	53451	58075.778	180	4212	44461	522891.241	56731	716384.72	12146	9456939.804	5618	248596.899	54564	66837.223	44335	1354799	2687866.979	493489.443	11631729	36307	1977	3277	37169670	7231	6541	12097545.965	10861	202737	120537	3315443.039	61646428.381	49245557.117	196869	504634	1298953.851	3439007.416	3804	929	30795738.833	7468	34678	2347	6486	10059	1049265.163	479872.792
Control-220_146	110185	530	18862	81333	101010.932	202	2991	47074	125872.841	91810	312881.489	13595	3813250.475	1535	186345.086	18399	63591.453	9653	619161	1406440.141	307448.221	12004658	62709	2288	3405	42428714	8129	3548	7293319.852	4477	177289	139969	1858811.535	54897381.823	25265923.574	59245	361652	610084.183	422447.56	2205	81	15332915.909	8742	28259	1044	5422	5471	4187641.54	1190008.28
Control-221_147	166854	686	8974	136464	210359.988	586	7923	47486	100922.975	99807	998356.553	9371	7943664.72	968	1085976.144	12709	591666.301	5464	446984	1907941.522	939887.796	9442799	67540	3539	4952	28348280	6751	4554	11176869.055	8064	569475	210360	3644169.294	94300843.348	25411925.844	54857	1120357	1172882.595	815418.162	1973	165	36551160.678	8822	31352	1206	5963	4962	4159413.635	1781684.235
Severe-272_170	88732	363	6571	60595	46791.101	516	16234	48593	7343594.547	37969	1047750.454	12428	2593383.109	3646	252027.192	72416	75342.445	44077	1401777	2286313.77	463623.225	11749064	27220	1753	4056	59559454	7422	6978	11687997.226	3200	276242	157673	2542294.452	43999972.747	31766184.693	193538	359587	1914929.051	1076940.87	2639	877	43574696.927	11000	24976	1549	7627	5348	2182362.552	865947.946
Control-222_148	75274	555	15433	109756	102687.774	242	5283	54384	257027.687	469954	705049.359	11363	6216914.869	928	949111.928	14033	236887.705	5723	169945	1820175.414	475198.792	10478236	328847	10885	2964	28608899	6703	4171	8337956.451	6287	259681	128192	3968595.948	97986627.72	29378704.22	69611	902644	1270037.662	814463.074	2288	326	26410471.766	10979	24038	1374	6425	5779	10247336.545	2657959.847
Severe-272_171	99677	318	6820	47847	42745.707	527	6439	48242	8443813.623	36808	599736.016	12555	9303619.347	5067	271897.005	60788	49121.3	32761	469417	2683708.548	455940.531	10913103	27690	1861	3738	40093112	7357	6105	11273683.301	7870	197601	172504	2872027.959	48550116.443	24130380.487	110944	447537	1822030.196	939244.596	2449	527	40491741.956	11469	38152	2606	7077	12821	2175657.621	689822.979
Control-223_149	94970	306	38701	181030	137679.983	473	4285	56745	101795.63	367437	617660.358	12519	2202528.294	1821	563734.688	10715	764463.392	7605	462555	1988315.392	439965.854	9980593	256949	11641	2255	25717182	7044	3183	11889001.208	2942	337104	132819	3109987.897	127504748.82	26959628.516	58580	534840	929118.8	816776.311	8642	244	48256218.519	8846	27407	2890	6421	11812	11057948.412	5020842.789
Control-224_150	121940	725	7051	23305	125694.08	3375	4174	44686	168550.158	15920	3515460.105	9406	14829206.151	996	596778.345	24073	3565349.592	51401	463154	2339842.122	849185.321	9477676	9390	1043	2982	39856201	6995	2805	9540950.79	12773	308868	205824	2566186.457	26383102.96	24059192.912	91332	276011	1194776.731	749415.635	6845	254	41481165.291	6262	28991	1857	6486	9615	4930843.824	1251473.025
Severe-272_173	113953	354	9030	112174	104588.611	413	2530	53076	8663410.404	103434	547210.171	17188	2910758.39	6001	278434.561	68767	452029.869	28499	643943	2775311.401	501469.551	11766359	68147	3879	3309	24018300	7049	5594	14375072.923	3553	205779	127917	4771701.997	93799683.63	33022298.9	54060	551286	1898184.737	1400136.269	4555	237	52811277.592	7974	37430	1670	8001	7963	7281588.755	1558163.492
Control-225_151	73021	224	5855	35968	28014.852	230	3396	44635	95037.269	37508	347013.568	8740	4453088.87	1002	172391.208	44515	895662.745	44591	417254	1191735.703	286463.424	10537534	25076	659	2963	28386390	6285	5344	5696675.963	7445	214939	101889	3021415.226	59785773.758	29962968.026	101373	311928	777726.766	646222.707	7691	379	16190063.347	8425	27193	2077	5909	10231	4984788.203	1064163.036
Severe-427_183	130085	283	7552	63590	81954.553	214	6446	43294	268975.451	26760	483713.258	11478	6539465.652	2340	187208.462	48779	63162.992	26205	1567982	3231880.299	383864.413	10436641	24415	1013	3244	42624379	7284	4432	20339701.37	7515	207623	142347	2392201.547	39295541.284	47758063.564	132534	680598	1629621.906	819238.494	3213	887	34169282.986	6861	32538	2066	5891	11993	2070031.312	803811.706
Control-226_152	88326	235	14339	74972	74622.469	151	2848	52234	137054.991	40948	439649.254	13777	6338833.825	1988	239827.739	38729	374869.735	41961	661453	3786251.956	368765.444	13648915	22549	1457	3186	51302414	6724	5705	21295344.5	7533	216687	130192	3393667.335	60749725.538	41175541.246	147597	496123	976106.037	1222064.666	5118	284	42854900.852	9256	29152	1730	6285	5112	3269543.99	512217.238
Moderate-305_175	83359	618	6174	64128	170109.835	271	4428	46833	220596.885	27550	1123373.554	17540	10501316.667	3278	419557.526	30894	62865	12924	1574684	2184454.01	758723.024	13894781	17745	742	3314	60735901	6850	4371	10608340.745	8051	306577	191225	2413199.516	46053986.029	26719877.179	60329	541057	2285985.157	865471.111	3146	185	24286683.84	11120	35915	1496	7393	2789	8285599.347	2295274.292
Control-227_153	128975	303	7415	90825	37787.429	264	6886	53690	167153.072	37569	933304.581	12112	6463539.819	4524	149009.826	15994	530307.777	7967	432715	3117523.238	437245.13	15421557	23499	1800	3034	45787710	7368	5138	17586340.918	7335	179638	94266	14460700.595	105984843.583	28378167.797	112031	437555	1226316.015	5618443.108	5295	342	29531995.421	6936	25074	3472	7342	5514	2619174.411	789379.48
Moderate-258_169	131378	279	5320	73016	101135.248	288	33483	48699	128939.452	27857	648580.266	10931	20634.995	1380	350285.936	35815	32197.206	27035	313401	2434951.901	529653.05	9828667	22966	949	4362	39232665	6332	4557	8858989.248	1329	170003	118571	3249958.786	54198720.436	31224211.913	65113	420862	1267095.805	921129.141	2204	297	28744545.853	8115	31553	4026	6396	22426	1026156.592	356124.647
Control-228_154	69085	224	14390	118900	123717.292	312	2828	52186	99432.034	149443	590317.072	12197	1591649.283	1320	493025.954	11223	49800.508	8590	193095	1922299.925	419605.194	11320355	100720	4508	3245	39228401	6511	2653	9282319.441	2261	250408	135176	5007400.539	80276099.802	26029248.159	28366	659429	1216107.931	1322786.354	5320	246	30197586.698	9477	22857	3148	7033	3892	5574328.364	2079267.498
Severe-476_197	88726	536	21634	123662	100160.736	362	72562	52677	137226.905	41974	664647.028	12307	8742482.692	2668	510926.951	66482	150731.823	23540	508921	2099810.056	553997.275	8714691	24607	1648	5146	36293297	6933	4766	9617596.888	9998	177297	150489	3878819.428	35998487.358	36634193.997	114126	787242	1014263.604	1393628.27	4399	192	24353051.868	9584	33004	2433	6486	3400	2679558.016	535764.759
Severe-395_178	41400	212	6536	38688	126909.194	4431	4820	44591	168946.788	25125	4672570.018	12975	3629968.675	2992	349396.274	64013	32007.056	31524	472944	1724711.089	423777.602	8391767	20813	807	3076	48410851	6509	6182	8816481.312	3823	265087	135668	1914751.33	33234503.104	22614590.901	164083	325884	1366355.858	636985.718	2379	245	31490982.099	9834	35543	2591	5206	1426	1172563.425	767996.741
Control-229_155	81097	100	9835	48301	70025.282	133	3608	48326	162428.918	18834	731523.688	11255	14286716.639	2346	260362.658	20210	48869.031	30401	309370	1814998.423	273455.731	10728186	19341	1387	2896	33959973	6774	3264	10278884.648	13489	450546	123231	2280387.392	41672866.741	23125340.768	46749	448396	1019209.2	617662.707	4493	280	37063175.421	4960	27078	1691	6083	2437	695627.258	206897.107
Mild-480_201	88186	381	49018	151274	87536.5	338	62391	59663	239889.172	256181	609074.825	11891	2888884.537	4070	518245.471	47496	110826.663	29786	379022	2516187.803	451645.542	8963763	177257	7754	4637	35651210	6291	5432	11708976.413	3894	215786	102860	3484181.924	12562449.434	28629816.421	148642	545264	951382.946	547514.564	3222	218	38490273.642	10091	30711	1461	7675	3358	99088457.403	30196994.078
Severe-471_193	82675	332	6650	67939	51991.952	194	10386	53622	184773.767	149123	483427.233	10411	3843747.194	1803	190940.265	27288	79105.604	19191	638235	2353120.508	439963.833	10797359	100425	2375	3059	47950821	6393	4806	11663328.375	5300	245394	146646	3553829.773	20437994.757	29315383.828	134008	683291	885942.267	441881.747	3718	839	35540847.184	9671	29194	1988	5499	4157	4617065.716	1696564.198
Control-230_156	154090	339	7546	44843	153152.839	230	3608	47206	103986.976	22280	497729.253	8121	16022732.688	2649	342861.338	17710	334633.755	15463	685168	2263087.016	495221.575	10009021	13184	869	3893	43725029	6222	3790	10418001.351	14970	273340	140777	2330889.6	2523947.844	36374082.866	159368	950597	1294579.984	222687.286	5426	208	32745981.414	5516	28481	1804	5966	3863	4325357.588	838149.098
Moderate-305_176	48124	510	8724	35397	113372.004	262	12242	48512	177941.451	31609	928745.069	10640	14794598.431	2874	325304.441	42945	1022561.016	24269	1264577	2267435.323	544322.045	13566046	20825	1292	4135	79033573	6635	4846	10096897.327	11097	267785	177766	2973145.725	18886984.681	22823359.783	304393	653106	1905476.404	409125.297	2862	399	23689730.353	5226	29298	2474	5828	5886	8421412.331	1749246.653
Moderate-481_202	126845	480	1735	60172	225425.204	304	5590	44154	152057.812	10764	356045.73	11837	3196564.802	1713	530535.632	44461	64993.675	56407	350028	1723798.614	748301.512	9917155	17365	815	6358	36906993	7022	7244	6465524.167	7038	336872	179104	1781409.849	291042.6	34219492.698	85551	852229	877862.661	29665.236	4059	150	15509809.713	8982	34760	2003	6492	5938	1716483.267	989718.319
Control-231_157	63497	276	4740	27006	77310.614	333	5710	39958	213713.102	11110	463672.098	7695	1830887.927	3252	155228.381	17622	657000.087	31226	293488	1369781.016	741069.541	7829238	15039	509	2718	27867717	5594	1831	7555896.078	3931	210651	116960	1941461.501	20562502.303	22017607.485	63414	521622	915903.213	579330.695	5587	409	23160386.322	11326	26176	1784	6638	3757	1109500.792	472548.774
Severe-425_182	103331	324	5714	29365	93870.582	399	4440	35186	446224.903	25114	787046.026	12595	5964186.924	6373	239568.478	46344	1056654.366	37782	644771	1952349.375	449107.086	11715345	20929	1280	3302	38658693	6157	4485	11132363.717	7787	252731	145493	2624344.454	20323002.353	31036376.848	162978	617584	1752558.733	617667.626	4298	1239	17473871.124	15949	31991	2512	7075	8389	822203.918	873500.035
Mild-475_196	22277	231	8039	76000	87500.776	245	2331	44934	150218.497	33054	329343.538	3530	4913910.744	1233	306589.385	39209	82443.146	16563	40567	2008733.371	449790.523	3287500	21684	969	2056	2367008	2677	2594	11860059.013	2955	60323	15521	3387043.171	41385117.303	30207718.955	12573	171866	706291.582	77138.578	3768	447	30692410.059	11386	30282	1578	4158	2910	1412633.263	634522.27
Control-233_158	106296	392	10250	71854	80710.253	284	5716	42077	135386.613	29671	451840.835	10703	6729009.929	3479	239196.733	40354	575383.917	49356	592737	3294532.223	541329.985	13121923	18723	2171	3583	44976046	5819	5024	19840048.726	9937	289120	129885	2545701.722	38288131.889	19061873.536	213073	738135	1243585.08	573582.591	5128	434	47730710.495	9708	24014	1879	6577	2763	4494127.293	579008.513
Moderate-466_189	48419	126	22809	111727	104647.452	558	37878	53351	91989.699	60771	917102.32	13303	2327085.511	1091	621736.169	34747	245868.633	16175	213271	1558824.797	869831.606	6126999	40377	2321	4306	23497032	6890	4892	9198765.856	3127	257284	123792	3233725.931	25980883.415	21808391.211	51002	785985	1458996.874	488784.358	3348	352	36343900.136	9261	35091	2150	5616	1880	7408050.47	2310055.462
Moderate-479_200	81199	414	12185	63884	174816.183	249	5016	46118	189660.012	13058	472276.549	10486	7590.156	920	257625.802	50913	43403.11	33218	496868	1826448.206	422334.884	11257404	18168	637	4204	35848204	5939	4619	9100408.857	774	323483	167291	2298890.236	620351.613	16835267.971	213709	827534	844630.531	115732.002	4018	375	21091159.443	7082	38622	1534	5296	3462	1505119.224	769313.572
Control-234_159	77770	411	17466	42944	140419.027	398	5062	48882	130604.659	22791	514271.356	11470	4735486.059	2889	120457.979	14499	407037.851	13744	982246	1982915.433	336701.67	12890965	16265	1492	3173	46262879	6408	4977	9155243.396	5381	238932	105775	2601059.886	12987049.931	21508812.371	154681	498695	1133543.967	431463.315	5212	424	19089250.905	11647	26464	1690	6938	3234	NA	818405.991
Moderate-469_191	48859	322	24307	166001	59386.985	324	6245	49712	90431.734	222043	553543.952	13869	3704125.339	2150	104637.91	58240	32984.746	45099	413463	1497565.83	449432.583	11749185	155719	9054	4745	26380555	6339	4758	8611830.761	4995	335792	143005	4353588.112	4179807.252	32619231.494	120210	1245173	898105.676	979924.254	3188	796	5200402.225	7985	36626	1341	4913	1558	1701211.059	451732.934
Mild-465_188	67326	393	4736	56231	151028.092	128	2887	45283	180328.187	264918	611827.921	14119	5767370.334	491	71591.84	38918	760478.058	27898	689928	1242369.861	249358.144	12199932	183121	5195	3365	26345031	6762	5662	7544636.572	6541	411985	469232	5528557.28	5137046.567	15147269.545	115119	457941	905284.204	329038.777	2984	370	11055459.773	5452	28522	2401	5545	4775	2174644.112	806968.536
Severe-423_181	97310	808	4042	88690	129100.026	337	4427	47530	NA	364423	113504.603	19975	2347042.535	1242	50086.082	63269	205350.611	31760	427075	482997.897	132338.934	13624296	251924	8735	4576	27690893	6704	5253	3933324.479	9452	322342	280952	1905100.781	8068242.83	9471104.138	52768	471589	551846.889	348755.102	3145	672	7515708.944	8162	40092	2306	5637	1744	1003011.578	241768.022
Control-236_160	67182	403	7202	60440	51467.196	326	14889	47144	269437.063	22305	501245.76	17241	10970720.315	5973	325798.694	29812	455517.779	54802	454902	2299102.205	168879.214	8610935	13668	1215	3292	37151906	6591	4616	9387345.069	13099	447173	161166	2048769.356	27199933.86	10428546.044	123148	398780	1566739.676	455494.273	3898	194	14824840.659	8390	20589	1631	6506	13542	116890.702	429881.481
Mild-252_167	83828	756	6011	38937	130205.136	344	4607	45709	35055.792	18628	128099.846	15599	1350815.799	4860	38520.396	54252	202827.353	39503	2191754	1059285.29	186918.699	13145195	21725	1008	5220	50183876	5825	4764	6997109.971	6967	405182	246182	1501845.459	2723474.139	10177355.13	157647	459270	643777.905	143746.371	2638	498	7423650.699	8617	30780	1228	7525	2740	574920.621	258493.167
Moderate-477_198	94774	216	10519	89108	113930.541	235	5003	48226	219330.863	41020	326601.133	13591	3351417.626	1172	116094.961	59469	429249.469	31153	422498	2284126.498	417374.153	11808240	25896	1971	3372	44484818	6231	4745	11577946.138	5743	224182	110117	2622731.243	9886514.181	12355139.214	221644	834979	585764.782	435317.21	4393	562	7548880.302	13305	34159	1536	5493	1391	609408.097	414020.854
Control-237_161	106283	380	11165	65498	77878.347	198	3670	51281	160957.601	42556	592899.134	12288	6016772.196	2018	173406.214	60101	302421.059	35700	503918	2087628.1	457577.93	9910290	26180	1038	3415	34597876	6027	6789	10802222.718	7795	369452	375782	4049972.401	52350889.754	26093256.958	102836	482279	1304053.08	1073113.209	3754	223	12178741.774	9096	29024	1172	5583	5121	75434.418	337321.719
Moderate-305_177	95218	316	14319	67986	120998.327	344	4546	53991	216906.292	36009	844821.334	14119	14060408.18	2598	362760.845	28466	591827.23	11006	699966	3247596.092	777181.119	11630321	23519	952	3811	64404386	6611	3504	14038712.491	10678	335521	177658	5731735.867	30974813.418	24851966.487	131124	858465	1597252.781	3584752.583	3576	322	24894160.096	7635	35613	2283	7716	3429	10294695.476	3465741.661
Control-238_162	60189	175	13304	86483	34439.544	294	6229	52579	255706.999	28321	645078.449	11716	5212391.948	2889	387721.418	49582	391212.948	30766	361995	2114195.495	236319.81	9190256	16119	1185	3375	32050642	6657	3783	8810053.295	4665	285413	143492	1986884.759	51421995.285	25679229.248	75290	686290	1058348.79	460546.881	4125	220	30117931.148	10093	24711	1904	7256	10945	7332975.935	1445077.463
Moderate-461_186	71144	307	7360	77649	97847.406	353	37162	54556	133150.528	41944	828550.948	11763	10911399.6	921	584561.995	23776	43949.297	11574	480780	2520588.097	425796.406	9627607	25131	1675	4139	50738088	7287	5007	12197480.623	10323	380543	211807	6148533.653	25703743.802	53787671.289	178759	1233647	1951962.546	5807368.483	2782	731	31762409.089	6633	31533	1949	5552	1806	6971780.616	3327212.193
Control-239_163	108323	233	7633	69051	78814.674	288	5237	52426	150052.488	91966	747578.538	16236	7094238.883	1514	170433.227	57441	199414.283	26420	613724	2101715.738	373680.561	12930348	63246	1895	3088	29175469	5898	6433	9297687.909	7742	298872	128426	2268985.288	80615205.98	25886464.48	42967	541068	884697.425	595742.175	3107	603	29068160.416	5990	35217	2064	7253	6839	5154976.457	979056.881
Mild-442_184	142527	690	8804	89573	240134.727	714	67974	51870	264202.575	51490	1009768.716	20427	3199774.096	2283	735338.286	61509	102529.878	30260	403652	2180190.172	556952.568	14667290	32729	2447	4611	34578982	6838	4070	9007443.944	3521	551041	239324	3183446.005	59769034.115	21636939.116	180199	735411	1747748.56	905815.77	3964	567	22962203.17	10927	34984	1756	6937	3035	9924545.194	3729950.498
Moderate-472_194	86298	1329	8792	55127	NA	313	5109	48131	120798.307	119032	581239.427	10634	14412860.565	2536	763716.484	34703	454928.585	18714	752887	1712395.228	742392.196	9198074	79681	3663	5035	33764509	6105	5807	10629399.969	14629	608664	376933	3424942.461	100980609.568	29215282.382	115259	571769	1103950.957	864194.703	4443	473	34201574.801	6466	33888	1772	6433	5386	13487453.043	2452156.518
Control-240_164	75947	406	9160	60755	117129.018	1101	3315	49685	254801.781	51910	1137437.676	14351	1246195.673	1065	318166.476	58359	667705.969	35486	511870	1851995.23	281132.438	16138985	34743	1758	2950	37150299	6084	5319	7757571.673	2952	271957	156255	2517039.333	67554188.431	23656632.478	51323	402306	1456244.795	750419.677	3520	551	30136747.516	9520	38079	1611	7027	5204	5217244.833	1565901.327
Moderate-443_185	103293	195	5108	111230	148813.919	282	7099	50771	1174108.915	280088	521350.573	10260	3501353.65	741	431048.417	30018	318646.112	13564	1677291	2040068.77	489160.518	12737550	192350	9741	4655	32520005	6673	7405	12255971.941	3821	338548	195601	4126604.192	44410962.799	38189979.575	135133	1566366	1359962.877	1207585.436	3326	742	43726557.711	6518	27638	2916	7060	6362	6310853.906	3068336.576
Moderate-478_199	97759	351	27658	122385	121611.239	644	100207	51984	69206.74	223232	574304.984	17466	163380.069	1345	515270.679	50058	40591.236	30192	375585	1503421.487	511579.376	11936263	153072	11471	5264	19856786	6519	3322	10390868.516	1152	214371	135150	2740861.829	112207052.378	24022406.796	92055	524997	858789.554	636370.264	3903	490	38813139.455	7598	40595	1628	5349	3154	2510230.384	1293829.521
Control-244_165	107789	521	22024	64410	40990.076	216	5000	51797	NA	20252	71111.164	15399	1747480.042	6459	13259.662	54418	35523.295	28673	506075	674779.486	40068.832	13581713	18571	979	3575	37232344	6148	4391	4970809.215	13487	219335	152185	1207858.362	5934268	6205884.462	70161	564879	488180.919	286840.429	3756	355	6754385.064	11842	52573	1458	7615	5610	410858.584	166616.885
Moderate-470_192	79851	1003	10565	49640	270646.494	574	8121	44154	211286.977	27795	1025355.717	11306	32799124.535	1683	440077.142	41482	139561.255	26616	925570	1159402.882	883412.526	12253231	21306	839	6323	50260099	7071	5626	7066349.971	29005	565522	598834	2938533.454	53656510.15	28635378.407	162813	529576	2029001.173	996183.235	3762	492	40134854.992	10165	34529	1800	5412	5686	7400528.787	2775358.035
Control-245_166	83522	1198	27359	34581	NA	516	15069	53853	115106.156	22762	1401017.113	18247	5037595.871	3837	80797.336	85889	826736.328	43717	328068	1400235.929	298408.425	9534134	22254	1065	3690	27227427	5902	7831	5953978.759	6682	792451	281677	3867134.376	93872002.169	23483293.796	63045	430487	2234911.246	980462.117	2927	488	22460461.112	5926	35797	1486	7861	7944	3202169.34	848001.03
Severe-272_172	122566	310	6200	49376	74504.256	371	4434	51831	22699375.401	28794	569481.872	13879	2743406.317	1791	215986.877	56134	50933.504	41063	770174	2420772.598	327919.131	11832625	30331	1836	4091	51145126	5941	6699	7480779.249	4594	253749	182864	2333733.65	38384568.352	17963751.916	157986	928003	1286684.403	617053.531	3086	484	29324559.292	8816	42026	1157	7714	5439	1703167.052	693538.321
Mild-278_174	83994	634	52334	198076	105868.606	467	46778	62455	238716.087	64637	1093275.519	17605	12005212.496	6763	184074.962	28375	842037.71	11061	1784408	2960688.32	484008.509	9194312	37839	1916	6782	53188792	7302	3931	14997423.452	14770	513204	232005	2842360.801	44774608.847	20320877.936	67016	597747	1275774.911	843107.901	3080	230	32128994.139	5668	27710	1127	8061	7308	5274351.049	1347550.088
Moderate-483_204	121512	273	12163	150981	95097.601	245	49046	60826	82799.076	28136	383036.75	16026	2258476.125	1932	272168.839	27761	53442.802	16726	373777	3662663.377	467739.541	9302082	27535	1223	4319	43787371	7043	6461	13672188.087	4072	234686	130295	3307838.125	89627944.329	47809971.466	56820	546316	704596.182	1181028.438	3952	190	37191800.957	9512	36573	9298	6454	116868	4908351.182	1734428.825
Moderate-419_180	91037	273	4882	90609	113840.597	209	3602	51922	247799.327	142514	703303.996	13861	4814466.964	1080	168344.258	48953	507919.375	32376	340303	1939119.466	326331.178	10850566	97257	4338	3855	35397797	6087	5275	8657396.452	7811	626320	195057	4548039.697	79472575.848	17083352.645	120911	691361	812611.715	1232746.423	3429	555	28515481.707	10808	39300	1817	6254	6041	3211827.312	848345.347
Mild-482_203	50097	958	30401	126543	82405.477	265	13270	53391	156572.885	168571	359541.079	17798	27879.093	808	529625.622	15887	42104.355	14542	361896	1816487.634	1356002.8	10550575	113471	5395	4655	20948010	5912	3785	9959179.346	2077	475153	137157	2963505.134	56453239.79	28790048.566	145682	476182	738067.861	758882.44	4477	291	26254786.265	9145	28826	2112	6647	5457	2628706.879	1139076.451
Moderate-473_195	91284	326	12023	103599	99983.335	361	7970	58716	142904.131	85295	1246481.565	12528	7560495.999	1650	273972.802	49558	71201.71	25771	459736	1749968.152	367041.155	8921266	55415	1602	4413	44827022	6564	5383	8146458.256	10594	272176	142031	2568791.244	91402250.454	40305407.79	97315	721425	1026603.114	631821.417	3722	816	23661935.887	7431	30145	1516	5959	4010	3148393.656	1323242.388
Mild-485_206	111728	235	5323	71401	94405.268	302	6261	46643	105746.795	31619	549468.658	12452	4462600.197	1223	339815.414	34576	304954.282	54182	296977	2200094.297	416478.419	10344023	17472	1523	3439	48742187	6524	2862	12531758.462	9173	393966	113518	3893110.398	59261409.668	25737935.137	82675	850152	1156819.907	1451219.132	4671	484	32986583.713	15289	30763	1809	5974	4364	1539542.458	414704.738
Mild-488_209	78589	334	12425	81638	87627.16	206	84658	43926	280714.061	20061	465264.836	19591	56734.305	1087	238351.519	15583	70269.734	7183	314425	1131765.959	272325.178	11817413	18686	748	5006	47633419	5561	3668	6472080.172	1450	217943	108309	3404588.576	72571685.181	24992542.461	88344	1305896	792193.513	786877.888	5292	357	28330326.616	11356	30643	1343	5658	5631	7285887.442	2081793.669
Moderate-489_210	58637	112	4609	73957	74630.19	295	4895	45050	91972.622	139095	404979.916	10561	660672.763	922	390347.7	40322	53557.426	24450	462197	1253030.062	487385.183	11325200	93295	3243	4074	22455494	5636	3970	7702342.345	2754	357581	96078	2221692.717	42146595.791	25360811.074	104466	1319246	1020428.105	512563.832	4995	524	34740955.484	10038	31220	1284	6120	4552	4085190.215	898587.947
Mild-490_211	69708	131	3167	27491	6938.311	81	15160	30607	68969.69	36030	214697.888	13434	1540200.808	151	36517.033	3962	898073.312	4689	196408	664240.459	180250.381	6075456	22983	1063	2426	14634266	5035	1190	4954844.95	2693	115139	49413	2043961.473	62721046.209	23570672.902	9833	277565	702744.744	654600.476	4955	162	11701859.691	11624	41693	2225	6659	9854	1222320.361	627644.241
Severe-491_212	84326	89	6537	78634	59345.616	209	52459	48665	65062.118	24496	364291.282	20257	1041766.51	514	115348.134	13084	87738.197	11698	205915	1963979.099	374801.351	10314786	19544	1230	3492	35097839	5869	3025	8018586.626	2817	190268	84562	1939376.248	69740767.68	23163668.596	74232	832430	817590.956	455484.571	5177	296	23566881.041	13647	36127	1082	5203	3419	1359598.659	344352.217
Mild-492_213	88525	960	11774	204865	305196.283	781	118565	58778	52272.779	37198	993061.78	22115	7599574.227	1756	775039.001	16208	66019.14	6246	419973	1432759.085	1593224.406	9888907	19949	1780	6421	31113628	6213	4033	6625809.774	12056	543217	288551	2972525.824	71031795.418	14112852.296	32000	601079	2091134.217	974508.516	5206	342	21691444.066	10337	34458	1125	6264	4350	1900978.537	782047.076
Mild-493_214	81440	389	10384	38537	137793.854	292	14687	43751	120377.036	94684	490028.964	15266	5673931.42	6662	292826.203	37957	394329.491	38066	250947	1456905.136	297471.345	10404281	63158	3937	3581	37843056	5430	5536	8446935.921	6013	391269	130348	2347669.886	48831518.4	23980911.404	85405	379327	842428.005	695715.661	5257	380	27421701.876	10074	35039	1427	7743	8803	5716595.479	1466649.289
Severe-494_215	214059	6	6	85	126289.969	NA	14671	1270	115114.673	23	383411.81	9781	4109545.972	39307	501653.878	14054	165780.883	18037	437436	2081686.864	587667.71	14572203	35	13	3532	50057456	5226	3175	10902692.285	7408	603977	161419	1894388.866	36617821.565	32614709.067	93045	2410263	755679.331	513739.44	75	14	28558487.967	43	30356	480	1255	151	893423.732	908552.428
Severe-494_216	180363	369	10815	56008	125435.498	269	40489	44572	85078.279	47069	584834.335	13636	2041039.919	1889	538144.604	7859	93349.411	9968	463984	2467790.106	487930.556	12871983	23261	1583	3869	50194217	6775	3239	12035158.887	3858	304469	161896	2914853.007	46867129.103	34581399.524	98898	1318763	798157.933	1310532.039	5112	343	34640456.328	13729	41798	4981	6822	47540	1866662.721	417134.062
Mild-495_217	103612	306	16041	135628	65431.268	818	31540	55422	92373.772	126351	931610.279	12546	633445.572	1601	138770.973	44413	90195.145	30883	320572	2133574.355	277935.773	13582372	82362	3144	3619	46372193	5901	5387	12951847.389	3380	246563	113771	2131216.722	52990260.144	24280985.691	226576	549179	929804.888	581550.149	4278	624	28522972.735	8883	32739	1551	5736	4139	961282.871	526388.238
Mild-496_218	127100	150	7645	61749	113973.441	441	23683	51209	82584.817	109607	565465.307	19407	3495941.457	793	222874.074	11532	69014.348	9686	590811	1646563.755	717295.934	14494453	73594	2783	4629	28729274	5754	3376	8604490.05	7025	372662	144811	2482642.676	83278629.633	19980588.795	83654	1100241	940168.138	616866.988	4348	471	21854921.789	11588	37362	1506	6063	3914	2293869.603	816852.806
Mild-497_219	132879	275	6348	110724	99314.415	507	26992	52158	103899.741	21404	881810.292	18960	4534862.543	1003	295934.415	33999	95846.433	47512	744444	1952132.805	441884.813	12857257	19486	750	5175	63574572	6211	4960	9549809.253	7414	398474	140279	2400283.892	55750940.794	28518759.639	111141	647935	1450609.525	763058.344	4957	777	25757603.715	11604	31344	1469	5928	5602	4590663.722	1596859.654
Moderate-498_220	131546	1215	18977	214016	267586.341	461	4837	61631	97418.829	356713	608672.019	15374	4615712.039	950	978200.769	20034	191426.813	12731	275500	2972647.012	1050648.402	9079058	248947	17735	3935	23953410	6185	3781	17103790.818	6589	369977	195566	1978817.681	91221503.111	25263962.537	34929	917080	816892.219	475941.003	4869	552	33293871.939	13857	37054	1639	6268	3735	3044136.282	1306958.365
Severe-499_221	135505	511	45255	186097	194288.418	499	15060	61137	124450.135	221729	813247.429	14858	2838211.57	886	851541.656	4237	136946.605	2855	342979	1879482.232	806701.198	8059863	147776	8108	4267	20106648	6612	1862	13188027.404	4724	564070	252553	2107170.109	50167474.186	27748175.659	30336	642000	1521529.105	388426.738	4495	378	38446773.758	6966	33392	1617	5835	4373	6139207.003	3600060.739
Mild-500_222	75799	357	3069	40624	72057.53	253	25104	39492	116158.338	44132	475897.198	14311	2600983.963	707	696780.174	25967	55135.146	30172	169894	921553.23	575910.773	8462006	31019	3485	4375	24255897	5129	5604	6098706.385	4389	NA	130825	3639320.816	74644016.459	23818371.511	105010	1526650	937665.766	1024882.347	4980	582	20385775.197	9171	36995	1594	5597	4360	2152387.295	762151.289
St_SF_pre	NA	91315	100776	105181	NA	181	NA	63469	NA	105169	NA	NA	NA	4165	NA	NA	NA	NA	NA	NA	NA	NA	68350	73	NA	NA	NA	NA	NA	NA	NA	NA	NA	NA	NA	NA	NA	NA	NA	56725	105451	NA	59581	NA	15345	126831	91312	NA	NA
St_PA_pre	NA	NA	NA	NA	NA	NA	NA	NA	NA	NA	NA	NA	NA	NA	NA	NA	NA	NA	NA	NA	NA	NA	NA	NA	NA	NA	NA	NA	NA	NA	NA	NA	NA	NA	NA	NA	NA	NA	NA	NA	NA	NA	NA	813	NA	NA	NA	NA	NA
St_BA1_pre	NA	NA	NA	NA	NA	NA	NA	NA	NA	NA	NA	NA	NA	NA	NA	NA	NA	NA	NA	NA	NA	NA	NA	NA	NA	NA	NA	NA	NA	NA	NA	NA	NA	NA	NA	NA	NA	NA	NA	NA	NA	NA	NA	NA	NA	NA	NA	NA	NA
St_AA_pre	4760	NA	NA	NA	4856.204	NA	30920	NA	NA	NA	4920505.177	8903	NA	NA	1183.094	1543	NA	71	1635982	68355.987	309010.74	309843	NA	NA	1823	73722	77	139	3911951.495	1636	725	1020	3444088.406	448405.295	29738855.935	129	535705	1579272.264	640585.217	NA	NA	2122611.732	NA	NA	NA	NA	NA	NA	NA
St_BA2_pre	NA	NA	NA	NA	NA	NA	NA	NA	NA	NA	NA	NA	NA	NA	NA	NA	NA	NA	NA	NA	NA	NA	NA	NA	NA	NA	NA	NA	NA	NA	NA	NA	NA	NA	NA	NA	NA	NA	NA	NA	NA	NA	NA	NA	NA	NA	NA	NA	NA
St_PA_post	NA	NA	NA	NA	NA	NA	NA	NA	NA	NA	NA	NA	NA	NA	NA	NA	NA	NA	NA	NA	NA	NA	NA	NA	NA	NA	NA	NA	NA	NA	NA	NA	NA	NA	NA	NA	NA	NA	NA	NA	NA	NA	NA	69	NA	NA	NA	NA	NA
St_AA_post	26305	NA	NA	NA	NA	NA	109364	NA	NA	NA	5598868.548	7951	NA	NA	NA	6581	NA	56	671434	518052.209	263544.766	357734	NA	NA	959	771244	131	78	3738155.491	950	2717	1424	1035164.498	209885.876	26704276.351	97	508060	538107.832	164383.749	NA	NA	1668145.072	NA	NA	NA	NA	NA	3604.3	1625.1
St_BA2_post	NA	NA	NA	NA	NA	NA	NA	NA	NA	NA	NA	NA	NA	NA	NA	NA	NA	NA	NA	NA	NA	NA	NA	NA	NA	NA	NA	NA	NA	NA	NA	NA	NA	NA	NA	NA	NA	NA	NA	NA	NA	NA	NA	NA	NA	NA	NA	NA	NA
St_BA1_post	NA	NA	NA	NA	NA	NA	NA	NA	NA	NA	NA	NA	NA	NA	NA	NA	NA	NA	NA	NA	NA	NA	NA	NA	NA	NA	NA	NA	NA	NA	NA	NA	NA	NA	NA	NA	NA	NA	NA	NA	NA	NA	NA	NA	NA	NA	NA	NA	NA
St_SF_post	NA	153880	136088	132201	NA	362	NA	35063	NA	84506	NA	NA	NA	1994	NA	NA	NA	NA	NA	NA	NA	NA	58451	44	NA	NA	NA	NA	NA	NA	NA	NA	NA	NA	NA	NA	NA	NA	NA	86689	96600	NA	75009	NA	13549	181038	42021	NA	NA
[truncated: 189 more columns]

## Sheet: AreaQCCorr
																Supplementary Table 1. Targeted metabolomics.
Sid	2-aminoadipic acid@14.99-gc	2-hydroxy-2-methylbutyric acid@3.52-sf	2-hydroxy-3-methylbutyric acid@4.68-sf	2-hydroxybutyric acid@2.49-sf	2-hydroxyethanesulfonic acid@1.02-qpneg	2-hydroxyglutaric acid@8.23-sf	2-oxoglutaric acid@13.01-gc	2-oxovaleric acid@14.29-sf	3-hydroxybenzoic acid@7.71-qpneg	3-hydroxybutyric acid@1.65-sf	3-hydroxyglutaric acid@1.36-qpneg	3-hydroxyisovaleric acid@7.80-gc	3-indoxyl sulfuric acid@4.66-qpneg	3-methyl-2-oxovaleric acid@14.26-sf	3-methylglutarylcarnitine*@2.64-qppos	3-methylhistidine@16.68-gc	3-phenylpropionic acid@10.28-qpneg	4-hydroxymandelic acid@15.21-gc	4-hydroxyproline@12.43-gc	5-aminovaleric acid@1.09-qpneg	5-Hydroxy-DL-tryptophan@1.50-qppos	5-oxoproline@12.35-gc	Acetic acid@1.65-sf	Acetoacetic acid@12.83-sf	Adenine@16.19-gc	Alanine@6.89-gc	Allantoin@16.81-gc	Alpha-tocopherol@29.39-gc	Aminocaproic acid@1.27-qpneg	Anthranilic acid@13.42-gc	Arabinose@14.16-gc	Arabitol@14.80-gc	Arachidic acid@23.63-qpneg	Arachidonic acid@20.10-qpneg	Arginine@0.98-qppos	Asparagine@14.12-gc	Aspartic acid@12.36-gc	Azelaic acid@9.66-qpneg	Behenic acid@24.91-qpneg	Benzoic acid@9.49-sf	Beta-hydroxypyruvic acid@13.75-sf	Betaine;Valine@1.04-qppos	Butanoic acid@5.35-sf	Cadaverine@4.73-pa	Capric acid@14.38-sf	Caproic acid@11.79-sf	Caprylic acid@14.10-sf	Carnitine C10:0@12.17-qppos	Carnitine C10:1@11.39-qppos
BlM_pre	1005.539	147.797	51.25	201.481	116679.379	9.589	4093.081	16581.261	751921.22	366.037	1372664.471	4704.482	NA	35.571	NA	740.746	NA	103.691	1898.26	427904.75	5777.239	312817.367	34067.344	7.697	2768.366	42615.41	29.736	70.091	642550.935	1365.513	5285.384	3078.259	17628639.96	1406307.349	9279030.621	685.331	13728.302	15431640.831	2876541.271	12849.329	828.439	29334398.674	5161.887	365022.969	2730.623	15074.164	9016.302	NA	4592.6
BlM_post	796.969	77.93	142.072	283.715	102702.002	48.91	15808.915	11942.292	1262878.542	NA	1238229.16	6918.582	1822.796	778.178	NA	1250.071	NA	96.766	25416.672	665496.313	5644.966	222802.11	42719.074	119.008	1243.864	209556.183	112.682	128.113	2093404.622	523.052	15799.425	3823.201	16505269.321	6598966.748	10425749.006	4679.573	10631.813	17289088.083	2977135.86	24742.127	851.443	26953498.897	6076.253	493693.089	4437.942	34830.288	5611.846	27294.744	17117.799
QC_5a	299781.866	2431.471	72182.504	419881.34	NA	1549.711	53948.869	199923.765	76780416.156	567935.98	9831454.849	22562.15	181929716.646	4531.307	5404402.64	42927.857	5485125.034	27047.3	1055616.949	46156917.45	5873850.056	25901310.849	478007.624	50840.595	8788.334	72552268.879	27785.091	6833.778	172743002.135	11842.002	680580.61	339093.072	40978000.521	685270283.027	211934088.531	399054.255	1427360.963	14922589.742	10368996.249	23397.765	2287.339	298833121.424	75525.991	353630.484	13789.018	26498.614	26677.321	61989325.944	23111996.668
QC_5b	219920.911	2607.632	72777.555	431143.031	2190639.401	1445.76	47708.271	194832.086	67159803.451	557597.009	9231743.787	20324.11	163086225.565	5954.076	5093454.608	44988.356	4932549.215	24420.607	1079851.936	39512220.784	4823288.963	23376115.362	472460.789	53611.613	6893.323	76160241.994	26615.226	6845.61	142657321.213	11871.833	651300.317	339731.842	29075191.67	615115188.644	202519765.17	374920.565	1358783.205	15982703.626	8945642.784	23799.128	2321.222	272015661.952	77549.645	350051.473	10685.498	28149.81	25158.437	54033565.591	17740339.209
QC_6e	NA	NA	NA	NA	NA	NA	NA	NA	NA	NA	NA	NA	NA	NA	NA	NA	NA	NA	NA	NA	NA	NA	NA	NA	NA	NA	NA	NA	NA	NA	NA	NA	NA	NA	NA	NA	NA	NA	NA	NA	NA	NA	NA	NA	NA	NA	NA	NA	NA
QC_4a	336286	1960.496	59773.711	343816.578	2246330.885	1185.915	115986.413	101087.968	90558002.868	466414.064	11833234.436	33470.09	192298513.18	2543.633	5901231.089	48451.921	5890680.056	29016.938	1532201.6	47257338.997	5468670.453	29607890.943	391135.015	38110.497	9959.107	62354607.942	29774.082	7947.579	161225393.71	15041.248	895286.007	385898.435	60600435.608	1191171594.332	203061875.732	326704.902	1342503.085	17442699.645	21233592.229	16206.031	2454.265	302237887.612	65905.959	360435.755	6920.48	22114.877	19904.176	83788492.184	23550943.949
QC_5c	242977.997	3131.747	77570.501	436783.849	2421544.95	1707.649	45686.001	182710.709	83937430.48	546486.226	12267008.84	23702.06	202910770.278	5978.035	5357771.92	43757.82	5833243.789	22809.352	1011592.038	45861373.064	5864879.979	24462295.214	474105.872	52573.996	8360.88	81941378.572	26296.868	6568.275	162625018.676	11003.619	643955.326	327067.585	34114501.294	830242071.985	217193435.654	308627.434	1316152.827	15444456.512	10857175.538	24544.089	2986.792	302042725.628	78864.607	351161.813	10653.476	30314.525	23059.48	65285914.864	19796514.996
QC_6f	NA	NA	NA	NA	NA	NA	NA	NA	NA	NA	NA	NA	NA	NA	NA	NA	NA	NA	NA	NA	NA	NA	NA	NA	NA	NA	NA	NA	NA	NA	NA	NA	NA	NA	NA	NA	NA	NA	NA	NA	NA	NA	NA	NA	NA	NA	NA	NA	NA
QC_4b	346472.872	2004.745	68176.897	388995.779	2549227.406	1437.762	96903.6	137930.051	78453300.565	519450.051	11199883.876	30616.627	180117224.311	16815.916	5283709.499	66982.658	6005387.75	31634.325	1083086.646	40419081.722	5035668.403	31127807.251	444189.282	42832.727	8067.843	75134747.653	29385.575	7803.094	151675842.067	13782.715	757395.424	373859.398	62210213.453	1195489050.431	200363406.298	313731.713	1298029.848	17081465.194	20613030.247	18207.917	2319.954	307659461.924	68253.144	373374.888	13079.766	25013.687	26887.536	82523368.732	23313503.649
QC_6a	313755.064	3298.419	104083.123	534708.344	NA	2211.458	50319.543	191644.386	NA	585718.222	NA	24439.554	NA	22863.107	NA	33453.824	NA	15543.399	743824.912	NA	NA	24144938.297	515134.701	69379.358	7500.28	54024297.229	25096.043	6451.977	NA	9751.561	596681.267	316674.912	NA	NA	NA	244351.613	1138475.571	NA	NA	23635.848	3373.563	NA	92120.289	NA	16811.629	36463.953	40491.495	NA	NA
QC_5d	253582.398	2471.29	76863.183	429248.23	2355778.511	1414.626	45595.741	146391.949	75664675.684	513029.945	9984494.555	22129.88	184794357.372	7368.888	4926821.35	41083.748	5016177.317	22836.796	1071601.343	40907916.772	5418482.228	24408534.515	438224.699	46947.389	7095.534	83182207.577	25802.082	6043.433	146076944.742	11422.126	612046.439	319386.675	31836360.737	764701003.035	196905288.725	299323.254	1302128.242	15823575.895	9592051.53	24520.161	3555.006	282342055.7	79397.966	358690.681	4175.585	29872.203	16905.913	62616570.029	18202734.822
QC_6b	255566.498	2773.264	102612.005	536542.13	NA	2196.699	65338.778	175070.899	NA	585871.853	NA	25471.988	NA	57370.443	NA	38950.765	NA	21493.984	898595.489	NA	NA	23350228.091	501370.609	67233.721	6875.381	57768491.869	23314.653	6227.47	NA	10141.413	608511.836	321028.771	NA	NA	NA	296438.901	1264695.151	NA	NA	24099.516	3633.374	NA	93216.961	NA	19217.184	35765.645	37218.855	NA	NA
QC_5e	236819.009	2902.478	74251.708	426149.061	2445897.083	1800.721	50814.734	46559.915	85612914.616	468681.984	11969047.196	23262.825	214114683.947	1678.195	5528364.109	42098.178	6134510.811	23391.866	1089710.85	43538945.872	6031518.082	24219408.508	399429.561	42793.103	6498.786	81474136.08	25292.293	6102.091	159018451.991	10450.229	576158.833	325045.005	41863544.524	968925806.442	206007961.805	284076.899	1337871.448	14464252.475	12188569.003	25470.288	4677.578	307169232.633	75923.973	367712.081	1422.724	29181.736	13264.082	61746195.165	13554008.578
QC_5ee	NA	3100.755	77101.727	447863.648	NA	1578.381	NA	29440.693	NA	443674.03	NA	NA	NA	1919.088	NA	NA	NA	NA	NA	NA	NA	NA	396135.975	41062.692	NA	NA	NA	NA	NA	NA	NA	NA	NA	NA	NA	NA	NA	NA	NA	24092.91	5077.205	NA	83010.095	355374.602	950.356	26858.248	11143.219	NA	NA
QC_4c	346196.175	NA	NA	NA	2486141.991	NA	86515.154	NA	91330556.814	NA	11411937.964	34046.275	207363747.681	NA	5956429.29	53876.619	6539902.27	25755.755	1056045.218	48879478.651	5856115.253	33922309.197	NA	NA	14293.854	88272522.773	31397.971	7510.088	169208295.292	14366.317	770443.273	372969.16	48947942.194	1171483770.788	214319440.107	285665.058	1367445.068	19772262.798	15630768.118	NA	NA	345570410.29	NA	382672.379	NA	NA	NA	93597075.586	27368258.138
QC_6c	291747.51	3389.914	99816.825	536668.539	NA	2471.713	77669.89	138278.281	NA	572207.07	NA	26583.448	NA	25261.663	NA	38940.051	NA	20875.791	911609.295	NA	NA	24397806.468	501299.02	67777.506	7264.453	58929973.283	25104.4	6652.049	NA	12587.493	606352.132	327952.807	NA	NA	NA	307779.338	1262308.757	NA	NA	30319.256	3659.87	NA	94816.056	NA	10755.809	37307.761	35088.998	NA	NA
QC_6ax	NA	4039.282	110267.656	619826.102	NA	2953.924	NA	194843.72	NA	625315.19	NA	NA	NA	1467.485	NA	NA	NA	NA	NA	NA	NA	NA	560095.771	78818.439	NA	NA	NA	NA	NA	NA	NA	NA	NA	NA	NA	NA	NA	NA	NA	22992.983	2895.778	NA	102556.085	NA	13163.675	36404.444	33973.188	NA	NA
QC_5f	NA	NA	NA	NA	2399136.068	NA	NA	NA	77960755.662	NA	11616876.863	NA	170538697.026	NA	5189593.809	NA	5503914.222	NA	NA	42073826.173	4335624.411	NA	NA	NA	NA	NA	NA	NA	151514355.808	NA	NA	NA	31008034.194	866790040.184	207176871.813	NA	NA	12948873.15	10068718.392	NA	NA	291202177.939	NA	NA	NA	NA	NA	43351620.299	7137730.68
QC_4d	NA	2220.151	79607.044	431242.525	2194039.411	1684.35	NA	165679.555	86939048.258	554650.325	11822444.669	NA	205242624.651	71725.646	5699515.196	NA	6230003.37	NA	NA	47557069.799	5729637.239	NA	481809.487	51693.299	NA	NA	NA	NA	165745918.211	NA	NA	NA	47329132.064	1134500166.506	219972393.542	NA	NA	17048894.689	15924116.961	21043.532	2382.318	346026010.74	77298.535	364671.353	13269.72	28925.305	32059.462	100518104.527	25052605.914
QC_6d	298393.598	3708.609	97536.648	519167.688	NA	2090.714	111320.105	123458.426	NA	554233.263	NA	27045.971	NA	17087.87	NA	45022.498	NA	24562.387	993030.947	NA	NA	23587453.475	483276.538	62337.781	6432.793	60901984.752	25306.186	6836.532	NA	12380.08	660601.828	324092.108	NA	NA	NA	354693.719	1327492.844	NA	NA	30253.606	3480.081	NA	88565.131	NA	7185.556	38574.133	14188.197	NA	NA
QC_4e	NA	2863.276	84968.916	443963.04	2301918.33	1957.684	NA	186667.682	67809124.865	575572.677	10529435.659	NA	164534658.172	71186.993	4503479.106	NA	4737717.525	NA	NA	42518867.123	4684207.436	NA	505440.89	53929.52	NA	NA	NA	NA	148655336.247	NA	NA	NA	38233270.42	382330361.571	194016150.697	NA	NA	14152481.404	12546147.987	23137.459	2884.295	305785765.298	78710.261	370643.763	17921	33818.29	33867.032	76370105.027	20399058.906
QC_4cc	NA	NA	NA	NA	NA	NA	NA	NA	NA	NA	NA	NA	NA	NA	NA	NA	NA	NA	NA	NA	NA	NA	NA	NA	NA	NA	NA	NA	NA	NA	NA	NA	NA	NA	NA	NA	NA	NA	NA	NA	NA	NA	NA	313785.624	NA	NA	NA	NA	NA
QC_4f	NA	NA	NA	NA	2074164.96	NA	NA	NA	74450985.408	NA	10329185.852	NA	183287075.529	NA	2482686.297	NA	5504109.767	NA	NA	41070787.369	3919322.571	NA	NA	NA	NA	NA	NA	NA	147794398.567	NA	NA	NA	42443996.218	310014818.108	92552225.722	NA	NA	16414479.815	9472357.795	NA	NA	81093695.95	NA	NA	NA	NA	NA	11374054.998	17298100.733
QC_7a	248666.042	3104.749	80814.356	454836.459	NA	1932.933	32594.511	138666.255	NA	525514.065	NA	20790.574	NA	3055.516	NA	50966.761	NA	18166.623	1036207.532	NA	NA	24779582.665	441298.838	54631.015	6859.54	74685747.609	26579.166	6867.702	NA	10776.902	613660.517	346556.111	NA	NA	NA	280397.942	1316299.288	NA	NA	26733.538	3873.352	NA	77800.474	NA	5778.148	31448.022	16330.9	NA	NA
QC_7b	287384.411	3436.039	88121.785	479177.03	NA	2681.021	38609.667	142999.532	NA	534326.682	NA	22782.422	NA	3032.61	NA	39173.441	NA	24242.685	1100046.893	NA	NA	26373376.958	457626.961	59896.095	8484.065	79669131.261	24990.23	6159.795	NA	11560.552	660634.087	345008.646	NA	NA	NA	347036.984	1354206	NA	NA	29491.664	4073.599	NA	84927.607	NA	5405.22	34910.186	15639.082	NA	NA
QC_6aa	NA	NA	NA	NA	NA	NA	NA	NA	NA	NA	NA	NA	NA	NA	NA	NA	NA	NA	NA	NA	NA	NA	NA	NA	NA	NA	NA	NA	NA	NA	NA	NA	NA	NA	NA	NA	NA	NA	NA	NA	NA	NA	NA	NA	NA	NA	NA	NA	NA
QC_5aa	NA	NA	NA	NA	2028592.507	NA	NA	NA	66547650.233	NA	8298697.446	NA	151900159.792	NA	3721184.061	NA	4572391.139	NA	NA	36776180.764	3731904.28	NA	NA	NA	NA	NA	NA	NA	130197182.347	NA	NA	NA	36102460.139	1183887367.51	192398296.282	NA	NA	12306518.41	10979646.387	NA	NA	279355554.085	NA	359199.316	NA	NA	NA	76860257.882	11400131.291
QC_6dd	NA	5123.62	121175.969	583664.185	NA	3295.717	NA	23724.013	NA	538982.776	NA	NA	NA	25171.468	NA	NA	NA	NA	NA	NA	NA	NA	502779.049	69412.498	NA	NA	NA	NA	NA	NA	NA	NA	NA	NA	NA	NA	NA	NA	NA	33041.14	3944.664	NA	115354.223	NA	2262.365	45621.65	8935.298	NA	NA
QC_7c	262005.722	3433.978	94557.174	470171.824	NA	2262.554	46942.643	154892.412	NA	505161.714	NA	25745.583	NA	5285.328	NA	43394.283	NA	23475.063	1143373.675	NA	NA	25485116.844	431333.36	55922.183	7966.454	76055004.987	26258.863	6745.399	NA	12005.528	683820.362	332200.179	NA	NA	NA	333990.989	1359268.772	NA	NA	31612.703	4225.466	NA	86958.006	NA	4223.007	38728.967	13562.249	NA	NA
QC_7aa	NA	4095.457	96326.666	499308.138	NA	2341.806	NA	135577.883	NA	524648.424	NA	NA	NA	9796.361	NA	NA	NA	NA	NA	NA	NA	NA	451631.743	51642.776	NA	NA	NA	NA	NA	NA	NA	NA	NA	NA	NA	NA	NA	NA	NA	31695.219	3721.473	NA	92038.683	NA	4404.524	37400.042	12912.968	NA	NA
QC_7bb	NA	3482.568	92893.568	463389.648	NA	2298.171	NA	143914.738	NA	512978.35	NA	NA	NA	4521.15	NA	NA	NA	NA	NA	NA	NA	NA	423325.955	55719.224	NA	NA	NA	NA	NA	NA	NA	NA	NA	NA	NA	NA	NA	NA	NA	29997.958	3621.872	NA	85145.357	NA	3407.652	37363.599	12825.246	NA	NA
QC_5bb	NA	NA	NA	NA	2030763.882	NA	NA	NA	75191650.406	NA	9734686.155	NA	176554164.868	NA	4663014.73	NA	5245615.513	NA	NA	39759111.45	4139547.585	NA	NA	NA	NA	NA	NA	NA	142135307.708	NA	NA	NA	34420796.704	1177464292.237	207355508.303	NA	NA	12801832.467	9667289.281	NA	NA	323932726.157	NA	NA	NA	NA	NA	28016694.553	21771463.058
QC_6bb	NA	NA	NA	NA	NA	NA	NA	NA	NA	NA	NA	NA	NA	NA	NA	NA	NA	NA	NA	NA	NA	NA	NA	NA	NA	NA	NA	NA	NA	NA	NA	NA	NA	NA	NA	NA	NA	NA	NA	NA	NA	NA	NA	NA	NA	NA	NA	NA	NA
QC_7d	268823.443	4020.926	102027.202	490262.956	NA	2397.121	61476.565	163736.457	NA	504047.931	NA	24672.99	NA	18467.407	NA	42992.965	NA	29119.245	1097562.287	NA	NA	24742834.421	435625.198	59126.136	8260.646	73640567.912	27124.085	6768.362	NA	12507.933	692753.55	345031.03	NA	NA	NA	278957.291	1343333.85	NA	NA	31766.927	4505.797	NA	93184.029	NA	2344.325	42440.023	14400.726	NA	NA
Control-4_1	246144.518	1415.031	24564.714	249049.519	708227.747	706.251	21528.837	86350.235	3014928.146	70122.236	18438939.077	13173.589	70186053.609	525.42	1886081.756	51150.132	417007.882	40914.103	781607.343	38681952.205	11028984.349	22971750.946	106482.774	13852.554	11197.404	55753289.42	25969.829	7338.291	158234008.524	10074.678	3588294.046	361096.916	40376912.855	704163462.021	292694411.64	281920.683	1554585.171	21399805.625	13729499.991	9832.159	853.583	348425815.02	43290.872	163818.808	11556.286	19070.531	39026.934	30354164.106	14435533.843
Control-6_2	372230.774	1525.296	24895.324	269762.959	1378005.928	993.732	93669.79	92727.108	26607340.404	782431.598	9220252.794	17036.04	228519270.684	375.98	4181061.87	32049.421	1073936.091	50660.729	457646.085	37258038.132	4603131.469	31742531.603	647828.938	89795.765	16642.768	59806370.349	26000.924	7842.86	129620817.076	19219.337	551998.165	455920.398	61181163.029	938007243.511	257104388.843	373113.473	2301674.415	14955519.604	13750889.194	13505.587	959.205	318231106.967	53449.899	133177.211	5509.835	20667.698	18914.403	39168670.517	15528861.839
Mild-7_3	471164.807	872.337	37013.371	165358.337	976442.062	1160.014	259789.481	98493.216	3136548.818	68015.59	21818106.565	37686.598	171633184.878	1023.884	3228659.684	65241.114	9781777.893	96160.021	2785590.351	54178408.693	4552908.125	45657095.074	140863.274	7659.076	16447.69	161850278.586	35843.805	10726.946	200507935.309	20174.224	1155367.449	446599.746	69224227.348	744685842.204	338498093.97	790517.13	2605243.567	16903519.715	27323699.001	10002.437	840.038	365034241.292	46944.06	201919.305	4091.731	20955.202	25487.088	14872339.659	13467792.932
Control-8_4	242889.949	1765.77	85284.579	299186.239	1138271.703	1114.916	40632.53	100577.437	1931537.809	249845.712	10803489.918	22387.916	101208578.763	979.079	3504529.258	44697.587	3426860.909	70193.034	830497.025	50300212.958	4811012.668	21441384.43	221998.361	27108.328	9269.97	41916504.366	30811.786	6779.249	202802247.579	7481.234	475149.072	253515.891	75618141.626	842710381.903	336333107.43	640279.223	2865062.542	14367779.097	16934972.443	13688.02	460.355	355165825.346	84352.716	186825.395	3886.501	21331.222	20751.726	65968978.643	14740393.578
Moderate-10_5	212058.616	2677.048	66356.18	128504.042	NA	1478.516	310957.65	116796.755	5211040.86	111214.351	33429440.357	24794.143	404736336.282	821.272	3875073.216	96213.599	6978153.767	93753.24	1403772.957	46897997.419	3114938.848	20768672.793	140891.91	17974.659	10306.722	76932031.637	32671.935	11086.692	146839533.097	26041.611	807636.36	684372.136	85786599.154	913250131.583	201613706.289	554480.16	1854864.65	16259898.267	23458802.116	10565.055	815.385	285293647.101	48209.095	162112.272	7463.549	21302.953	23387.6	67643474.233	20063137.077
Control-12_6	364167.529	1403.887	58443.042	340497.914	755875.29	1372.224	50840.581	113202.113	2554427.852	292461.918	8062105.571	19787.694	129319782.508	9228.921	3504575.956	94021.541	12897272.77	98164.945	875622.174	50084065.441	3277811.862	29984988.675	270592.636	34694.652	8559.347	59804085.392	24878.481	8118.369	193357465.745	10189.89	525678.741	318374.554	53871187.516	452244272.705	359926675.681	836241.122	1661224.869	14054958.609	17389522.563	11321.888	593.973	406333392.514	64186.993	156198.521	11134.589	26114.067	49417.404	45628068.701	6645112.635
Moderate-13_7	434739.803	1324.339	65327.812	464742.687	750116.368	2351.778	411474.364	111601.935	1080351.374	212243.681	12961126.88	22568.025	59496749.271	2624.002	2306091.252	29790.292	712144.818	21024.526	755060.204	48005191.139	6202923.988	32147531.937	232962.295	27140.946	9794.91	64025779.763	28449.712	5458.184	181189784.883	7021.434	813303.709	244931.417	59622386.477	1046387427.141	180744265.184	896971.392	4330992.933	13356368.57	13448708.457	15130.793	690.503	252255939.768	196310.327	161934.721	5918.27	22422.28	16127.287	41690004.713	17809546.544
Mild-14_9	292653.324	1501.077	149636.413	245495.55	670361.016	1206.118	163292.852	129088.6	4928371.425	101783.31	34458950.523	22210.755	101243517.668	7034.382	1842176.891	52788.296	2709982.274	45041.103	2290952.547	65545443.884	2646384.905	30136054.613	186503.644	5867.73	13645.557	145824437.154	26991.653	8858.6	203633381.814	9159.78	583514.656	288914.473	39884458.25	1079075084.943	293929846.596	422230.503	2490455.216	14382806.285	11193959.986	10566.913	3123.817	279948173.047	55285.213	124477.078	4476.414	21558.379	12794.158	109447457.841	26380273.391
Control-16_10	287751.154	2049.668	76769.852	639297.735	1194741.488	637.089	281738.764	143530.988	3268574.671	1450189.04	12688920.316	22391.538	43808376.861	1331.685	5159462.289	35527.291	2643715.667	19881.252	894175.571	64353251.525	6576882.862	27840486.6	1087477.558	151144.509	9989.252	60518816.624	41517.896	7849.004	210364696.187	6679.208	645219.354	318553.806	45991205.511	1059032062.416	299902218.101	569320.359	2779461.346	14899280.952	13598213.263	10496.336	1029.785	433100018.575	63833.2	210280.537	5600.052	19883.286	11807.929	70080499.962	25442992.303
Control-17_11	287267.478	1430.085	42621.446	176130.357	912291.125	944.961	71674.493	125379.924	4118788.75	162377.244	12849783.97	18998.497	201793408.939	5164.812	3894501.29	63766.577	4063501.231	48181.904	1662531.489	45325279.415	2486524.406	22899902.598	320188.313	27828.172	6934.824	62699718.665	27746.098	7476.804	134127061.1	13820.02	452511.205	294178.946	40787874.465	371377185.105	296933527.732	493445.271	1613036.83	12421221.46	11361268.05	11282.579	726.59	348629727.851	63458.844	155772.402	8530.874	23135.796	16735.327	6908479.389	3381428.297
Mild-18_12	641632.126	1680.038	43655.257	244634.311	770043.649	944.532	126111.385	155238.913	4514277.932	192862.322	16749965.476	20253.605	553428249.391	1498.748	7669422.105	19643.52	10823600.945	12241.697	2011455.892	76264675.146	5179799.883	24551816.278	206416.227	25917.01	10239.7	83732329.258	33370.032	866.26	219679049.383	29297.851	497997.193	253170.29	25883618.995	188606351.581	269193312.254	550804.693	1149668.013	14712647.957	5280292.352	10873.811	413.922	302912051.02	36466.536	247878.767	7477.699	23264.597	33247.528	21491443.831	8120525.483
Control-19_13	416653.006	2035.156	43798.056	350015.272	1325947.068	1116.488	156285.3	127556.434	1936330.784	951388.989	19455792.53	22293.007	53374562.802	1595.966	13371901.974	42369.95	2530022.785	58880.762	1119221.638	36464373.601	4782545.635	26945382.017	743439.646	138265.073	9391.715	60929108.903	24617.973	4951.385	142921213.771	4187.296	804588.027	358376.025	85218845.28	959220417.458	294558597.833	461052.693	2572584.917	18163743.24	18879673.623	15476.657	1271.052	213533243.966	72060.426	184656.417	10130.218	17719.981	10246.142	50602351.925	16164643.104
Moderate-13_8	368592.827	1956.752	49847.655	226314.728	1032382.082	1403.379	223736.284	147804.773	3782447.689	146812.23	21282587.284	31426.193	173254047.969	1757.147	2495530.652	35927.467	637003.509	24549.47	1601879.782	55095088.987	5152180.111	34856581.002	194715.292	24319.099	15828.193	108963481.276	37400.487	5605.685	182162634.899	14044.209	796247.57	365884.659	125389637.548	1233610173.517	230177234.437	545508.137	1451918.893	17421082.131	102194455.823	11743.552	347.758	272943207.396	89184.913	166818.295	5090.686	21426.932	15659.07	74098547.923	30496776.583
Control-20_14	430175.456	1370.382	28272.116	495139.613	933369.841	1025.042	62770.235	145484.147	2179393.96	1236306.578	8580268.412	22122.686	137216275.724	2557.054	4310261.929	38611.919	2091849.422	40785.636	1013147.022	36635793.783	3905393.492	26237155.815	930314.09	179715.889	9845.734	49955750.928	31261.038	6987.216	142233819.86	12579.55	700318.497	233659.389	78413576.431	770409068.87	299699230.938	415035.314	2814294.674	14089675.825	16987161.008	13080.168	2564.493	238831248.855	61463.464	187425.745	9095.503	22210.674	22622.805	41149198.652	11588340.141
Control-21_15	255459.413	1781.12	77113.419	858365.405	370851.735	1436.545	127926.557	152294.905	NA	3496478.801	1990491.707	18080.741	5223518.977	1228.15	446703.611	27091.699	77274.103	17365.341	1272519.625	13400021.876	551894.006	28414863.812	2374584.82	302017.648	8698.254	80544148.989	28815.048	6098.243	61731074.299	3408.115	626724.657	219442.492	19870893.992	225189522.347	127821061.541	578059.502	4369460.373	10652683.978	4441328.423	11336.8	1226.16	69058459.46	40582.526	197316.842	10109.161	21399.926	30291.995	3551907.016	2276330.921
Moderate-26_20	320698.74	682.474	73597.161	758045.842	135272.877	910.96	228098.515	153292.5	1367970.015	349928.7	16431072.211	26628.029	73641339.662	3672.249	3646966.65	21503.764	972062.439	8610.194	957734.324	57965519.982	3605484.68	28256066.192	299285.77	59623.568	12169.585	68086851.703	43002.728	5586.791	217838938.795	6212.084	559596.974	140129.761	94487437.945	958982908.062	347142554.557	597830.976	2371688.532	15835268.238	37063008.547	10098.305	753.844	612061178.968	71149.023	154024.316	11123.924	23279.54	62565.237	30290764.023	13450856.45
Control-22_16	902287.513	5910.003	63699.994	263298.17	4759610.88	990.932	645076.614	138971.606	1934472.244	142977.465	20596480.119	23005.899	1113310468.882	4662.898	15963063.758	30842.752	322293.327	14472.411	1076812.724	75095424.781	14821236.206	33473137.972	158545.553	14320.654	12378.255	120895151.593	27728.305	8160.781	263890205.024	62820.741	890950.567	796782.946	59355709.604	801724589.595	351548604.696	876972.19	4345627.333	14260422.524	18454213.871	12986.173	3431.92	266937435.679	39824.303	165402.854	8055.802	23369.132	27186.585	75317421.174	36292439.4
Control-24_17	307713.483	1834.333	61528.436	248521.389	939216.269	732.889	416671.161	145591.118	4910569.494	116472.887	14205556.212	20851.79	2161940.762	4777.259	3895922.402	20088.332	300089.419	14451.929	560353.264	50441673.954	4848463.985	27489586.675	178067.989	19340.221	8092.423	77847567.356	38246.112	4492.18	188144185.414	3087.268	505771.143	292824.83	42429434.641	395775816.536	363924242.075	434285.668	3636701.141	14152309.158	12807915.202	7738.168	929.128	391310184.246	59006.864	187868.202	5905.717	16537.05	10953.097	24426118.792	8465069.482
Mild-25_18	98730.926	1526.794	42025.93	224432.899	572452.182	884.408	10042.495	162381.503	5342426.217	108425.676	16121750.955	10094.498	136109137.694	5527.343	2795464.333	50954.445	1326051.273	41481.29	341114.263	63559184.189	3310850.069	13418767.875	160949.357	13373.015	5620.879	19509758.061	13504.57	6259.783	209989900.041	11418.33	208838.612	119538.026	45374542.607	319835831.899	198790038.515	186145.378	392671.838	18117641.762	21476353.817	8057.429	185.757	381862981.62	42723.478	198441.668	7716.385	22035.238	24617.102	17638607.863	8397950.208
Moderate-26_19	535620.679	2862.369	107355.529	1062509.392	936362.537	2001.112	178499.51	184273.865	4213986.106	413919.997	25778879.071	23802.035	348305522.904	6799.26	6119688.759	25050.093	12353158.238	8276.947	1166364.503	96840611.012	6228175.899	30539685.103	285986.761	39580.764	11486.632	135955808.575	46266.661	6192.157	316600410.529	17497.184	597655.954	295193.155	69305062.08	653535869.185	331020118.999	480410.054	2580853.402	15677477.588	33905222.875	12331.652	573.005	508990518.751	77542.345	197263.419	9021.072	22452.548	18162.427	54081384.377	27739345.917
Control-27_21	226851.303	1156.696	301047.766	58729.91	2822304.969	1278.451	30566.338	122266.955	898111154.01	61577.881	11354614.684	14420.515	17747450.268	12391.206	42097301.337	22063.814	380400.502	30727.328	439478.516	32097079.409	7520863.875	23897061.069	142771.104	9536.739	10672.641	55597910.982	20973.23	4009.743	121186375.297	2351.645	933815.837	487420.83	32989871.425	441395119.888	143159433.333	149669.998	905826.432	16707484.791	10864003.354	10296.837	863.042	492276366.043	41120.703	173575.865	8696.254	25517.186	29213.194	30725690.689	10342392.024
Severe-47_36	491967.418	1151.401	193835.006	709584.337	1390984.532	1097.76	250620.333	121495.921	1671755.747	209182.428	10202130.677	20713.827	1421494.254	1386.94	1048446.108	13386.691	124466.496	14978.738	817431.099	52196716.078	5083059.438	20863295.814	167096.048	28708.79	12518.166	61113775.735	29662.954	3918.795	182810412.353	1463.052	473563.007	215579.668	157045772.896	2419945758.061	332096661.58	896659.221	3282890.81	11717668.58	114008764.878	11250.471	2607.024	168319309.321	41042.281	153651.507	37242.434	21103.248	80675.504	5776330.553	3162837.233
Control-28_22	143310.468	3354.041	30412.891	113400.914	1649113.16	521.021	67272.95	151942.738	5881728.525	74579.067	9514804.88	20254.702	491635712.928	5706.739	10520842.048	19900.858	10071767.813	19698.215	1956653.263	58435463.543	5216677.65	21318251.736	125829.928	11903.411	10465.809	64108796.619	24341.917	6935.872	208591531.446	29299.304	450681.282	357915.909	207594194.051	759234647.901	175919398.513	466480.476	1029096.303	15149008.079	44647135.414	10717.105	1275.984	354347701.532	50901.716	156287.131	9176.398	23931.702	26702.335	29381038.627	10907338.83
Control-29_23	230223.374	3287.307	67620.375	143120.71	1681921.096	947.972	87587.769	165855.201	7419436.791	89771.991	11660728.713	22207.84	570902177.81	7071.574	6123767.782	85272.636	3806654.983	90747.802	789265.201	44294336.104	7292817.489	23798558.604	148819.985	22937.133	7617.808	65323886.525	25263.67	7757.824	147031904.349	25910.516	437024.71	358420.245	51171127.18	838120632.849	234488877.825	387275.015	1497521.408	16232539.506	18558378.38	13668.575	1352.907	219324107.267	97169.078	189820.961	13551.52	27945.481	36372.111	35088952.856	8531322.106
Mild-30_24	276448.871	847.623	32601.424	273000.01	285599.348	1085.314	66340.204	143492.575	9053584.235	58892.675	9260993.838	16446.943	119621763.585	9170.249	1541949.382	31192.329	8535826.445	26864.592	904964.048	30005686.095	7367089.34	21924387.496	142350.521	5697.194	6317.797	90420155.27	26278.996	6059.693	93740890.828	8253.673	427525.706	282245.632	35949054.029	772942450.721	256216518.843	475378.523	2658012.691	13240559.51	13469611.992	13969.31	1279.364	389011997.121	68180.748	199453.176	12702.154	26667.758	29426.619	5043051.392	4809924.621
Control-31_25	340833.857	3015.38	62026.567	642300.937	868002.383	1170.359	136771.182	199214.696	2819566.827	331329.211	16936115.793	22758.436	251827134.244	23956.164	4210684.516	39338.801	1604586.119	16872.32	529090.229	64370728.217	4313675.051	23691529.132	284888.587	36053.874	15187.361	85598675.03	42500.034	7685.076	229776442.949	15908.594	532279.996	296694.025	51342643.521	775703965.453	306780902.891	207044.377	1345932.159	18356803.712	16873956.677	13815.109	674.128	320488640.738	77716.009	219818.141	9436.967	29286.514	28619.916	125336446.897	30454848.612
Control-32_26	433968.877	3348.843	86831.421	273160.601	3569457.699	1805.57	55741.497	176168.921	20803224.89	628667.871	12227047.388	14741.537	261044158.04	3661.139	19204732.712	16307.254	11254062.695	18632.391	1092787.709	38345230.332	5020624.152	32697245.654	526740.951	96497.389	8552.26	57100668.222	26531.528	4024.593	136191813.223	12202.576	662573.497	462355.819	60793885.228	895331880.282	188665743.081	303697.607	1256270.418	14934529.387	17119345.722	13211.27	1104.087	338391892.577	71235.006	186420.854	12944.588	28008.854	36635.495	121831263.326	45227933.032
Control-34_27	371867.155	2177.67	71412.284	221530.51	1363987.971	1858.435	46696.684	163528.574	1742494.916	156688.339	10083880.096	17245.758	171551854.124	14838.363	7300220.942	42190.845	9518022.663	33138.359	1650823.19	70965315.575	2893602.548	23078356.541	156235.235	17020.883	8653.861	105045867.793	17404.848	5169.104	241421048.695	11810.982	786489.044	318635.283	26904477.481	293870556.617	288795093.873	449217.309	1678802.415	15753884.202	7412501.403	12284.81	855.119	388597212.215	83326.31	152191.469	14118.544	29744.158	36023.366	19384463.558	6356433.616
Control-35_28	207178.032	1909.986	29876.877	253674.11	1581319.162	1027.368	41154.45	165715.652	16016928.127	125364.46	7473085.01	9713.851	203843087.837	26932.567	2502871.097	63588.463	564518.632	74586.503	285538.209	42074309.629	4742171.29	18936480.806	178731.36	8834.401	6797.329	24732514.974	16534.086	9026.253	144441625.824	11252.447	380753.919	388456.564	58071351.562	867342683.814	231452607.795	161288.603	1177988.045	14122872.365	17091876.905	11861.712	1342.258	205061493.5	55345.114	185044.11	14782.345	25988.987	26756.776	251044318.798	22561727.356
Severe-47_35	266476.759	940	151416.39	777006.43	1693167.3	1865.96	94404.874	173660.311	2676591.477	197501.548	14231114.683	21787.849	34266898.509	2773.047	3708665.32	10351.248	1950077.578	6641.498	505618.869	27750168.723	9703596.137	14066280.377	223197.88	23302.061	11020.364	42113788.739	33704.809	3566.648	109582270.74	4200.077	474332.728	201690.729	51844385.459	1378993711.303	239276319.486	236480.198	2709299.117	14715880.2	11890622.805	11862.312	2245.625	205875250.814	70379.067	196140.875	9162.272	23414.281	22356.56	54484517.323	17339852.578
Control-36_29	357841.766	2106.354	42507.322	382433.008	1276116.171	1354.029	75448.435	174806.398	2848625.578	470109.404	7825816.844	21960.139	171047983.465	6364.741	2990252.177	39241.112	491403.621	28601.572	1037652.538	37476959.321	2626534.898	27315309.203	418435.085	20413.751	9083.849	64646468.718	28790.224	9502.274	137394262.613	21551.354	531865.873	355227.579	62473722.803	696788233.649	199823604.443	361805.239	1687375.916	12375153.255	19882556.782	13249.332	2034.305	231241046.094	80330.909	165771.966	8546.321	23139.086	21347.262	84693409.56	36751920.269
Control-37_30	445455.484	1099.392	44994.725	216395.735	774887.32	1171.956	93857.554	161996.183	2757988.784	155566.241	7156814.916	15584.723	89047830.387	3622.568	2651988.355	39108.048	2137241.371	37512.516	292518.193	64649365.015	3938962.44	37865024.705	197400.817	9684.916	5367.674	66288374.363	22039.428	5549.976	199973482.075	5217.982	416354.71	205509.433	36175474.267	615802573.076	195577446.919	371416.896	1409161.344	13536915.739	11867435.791	12726.636	1640.584	390936614.921	78252.539	174008.461	10311.656	22113.602	25705.885	101885158.234	27420287.431
Control-38_31	266946.44	2175.808	35738.693	310336.566	1134392.515	994.795	36183.729	170818.637	6382715.265	517572.359	5111581.212	15441.484	123672711.117	4063.115	2387170.002	54052.872	3123505.488	35755.608	1666679.733	34192103.429	5535613.557	19988601.005	456067.614	34884.31	6255.596	57531666.995	24585.949	7163.501	124118775.814	15106.739	334209.039	235198.041	38470216.179	732562130.986	212237474.757	447707.89	2275027.145	12185205.818	11131086.411	13380.265	2549.718	214170831.232	84132.852	185092.161	12145.014	25294.786	21343.474	67829845.349	16509221.676
Control-39_32	200961.923	986.369	19977.398	401310.148	876982.321	1074.75	36492.499	150790.043	5562573.286	733546.077	4475838.985	20974.277	62004452.835	4488.164	2236127.397	50858.184	2384245.206	49412.702	710937.433	20177663.421	2290842.283	26947354.989	603402.752	24174.181	5893.992	54732425.068	23641.669	7252.626	90897542.24	8194.65	434967.886	263036.944	64857455.662	811805806.292	216742758.724	423239.082	2150078.811	15128347.052	15619555.375	14023.754	2548.304	240371469.813	70882.542	190777.708	10837.281	30131.292	23961.172	42762783.549	9116277.433
Moderate-40_33	370875.448	1105.821	19362.599	441883.713	1272700.148	542.428	98491.341	160771.499	1626323.489	125420.246	11420215.943	21449.206	132057972.666	1943.634	3087401.986	24475.641	1526255.575	18850.381	392387.544	36659193.102	3435177.632	16479177.285	163885.665	39572.715	8480.751	55317952.359	35287.239	7138.733	161034858.388	11382.642	331140.427	159814.848	45534475.183	542126634.52	301771950.201	309300.701	1421437.167	14798862.672	15078530.645	9937.366	457.331	298854725.438	76914.657	157454.795	10592.455	19367.098	30135.059	11650159.262	5427268.361
Control-41_34	382600.293	1182.485	32892.831	107658.993	1915381.958	870.223	19694.697	115937.973	3711683.653	217187.491	11297102.066	15854.977	236371925.735	6233.513	3362202.493	31918.754	25643567.364	22606.912	929573.875	45785542.675	3269175.024	27068490.575	252203.21	12242.984	11660.908	70041976.841	20304.736	5725.99	151893213.276	15207.317	1501303.183	384880.962	82524158.107	953787169.241	228996569.841	192280.42	1280195.547	15980800.192	21741936.273	12841.387	2142.794	305619787.466	44690.748	231539.503	8209.185	23695.051	17311.015	71284666.728	15792719.569
Severe-47_37	299877.174	4825.194	128770.449	1400893.893	3370923.715	1685.267	57494.113	187704.128	1640949.814	1537877.794	9174323.53	19436.36	4484540.656	4005.554	3019422.665	35960.832	182793.732	27549.798	840159.716	41342198.585	8079477.592	22093387.918	1128910.402	351980.062	11842.611	44625957.907	30849.013	4690.994	183588347.969	2333.838	617523.606	321847.286	58479034.149	886764348.569	259840556.635	462932.156	1130400.57	15186262.085	11792342.816	12091.56	331.49	160541709.988	45749.003	167806.014	10904.429	26213.962	31923.75	22218207.037	8856920.175
Control-49_38	217580.695	694.889	43588.644	427538.579	933820.719	1297.121	31307.001	189213.871	4294902.125	837357.732	18205445.714	12816.056	368449605.468	5738.809	2631752.66	40989.974	7195046.162	21629.082	479901.247	42050933.614	2890943.363	20301522.104	688505.891	49670.564	6894.615	53625114.274	24387.97	8099.878	148730656.062	18687.355	327320.873	173391.722	49295462.86	1537961360.216	265824194.133	206550.531	1182181.248	13821668.45	13129539.786	13338.585	1774.333	294278794.234	81886.586	166864.401	15511.199	21218.602	22177.042	71499473.588	14648104.295
Control-50_39	193385.512	1724.754	27602.964	164973.196	1209972.7	962.521	21407.253	169022.74	3164935.796	612464.834	7437821.851	16412.462	121886661.39	3839.514	3609451.218	31229.325	8782322.18	36358.761	387973.293	26663592.128	3224311.713	19799926.046	516992.342	32108.518	5823.385	37797284.47	19676.285	5614.908	97954025.053	8545.778	501647.697	239896.138	58834864.576	1012951756.176	205510838.504	258229.467	1318904.947	15988962.282	15105202.38	15189.658	2339.701	236644713.84	85457.075	157024.92	21174.516	24594.499	35758.097	41031643.837	9534520.732
Control-51_40	251956.692	2255.705	29371.814	293380.699	594845.68	929.151	120062.422	196154.169	2133092.542	211328.862	8291135	19997.879	215964385.078	4461.764	2886146.337	29094.23	3202586.44	27951.274	858642.551	52361594.241	3696697.268	24910068.408	265017.236	36333.07	8199.05	72929434.5	24362.888	4614.799	199658672.063	17178.144	328639.222	197309.77	38415638.548	573522689.418	239425856.537	360550.883	999815.753	15358753.322	10625230.433	10429.161	1245.622	280800825.187	69833.458	156742.199	10271.918	21369.043	20327.897	6076410.765	3053148.167
Moderate-68_45	193432.726	2863.873	69034.996	1231287.098	1274741.045	2037.83	3882.482	218064.397	1430934.153	2273142.397	14782019.098	9670.959	117973435.584	5502.035	17691591.971	94891.439	743825.639	46315.716	169275.079	47697524.51	8788067.588	14488695.555	1633550.526	555601.472	8609.311	16963776.125	16285.947	8976.675	166723707.522	11452.445	517508.604	197969.976	68126120.978	934725678.379	205247872.284	89092.392	758449.047	13007890.354	14872183.56	11808.058	520.3	478200695.561	73761.859	216197.399	9600.293	27010.638	24074.722	72802915.124	23706608.707
Control-53_41	239170.232	1735.805	68693.206	196669.967	1265540.826	1059.156	3845.979	215424.609	2420499.441	166811.637	20120083.986	12505.849	106134184.298	4064.225	5242751.85	28288.497	3265785.259	15479.763	735227.972	71498302.098	4098198.855	21984240.489	186938.443	27687.701	6518.77	62809072.875	18759.749	7214.122	216368632.693	5474.948	335442.551	224471.908	43352563.799	688573478.69	257365048.057	169078.218	1003684.736	14988834.002	21272135.901	14360.173	996.85	462599333.694	83446.843	240980.506	14830.497	24774.351	14414.968	11177463.505	7881189.688
Control-57_42	188888.428	2088.585	71117.392	106446.49	952234.973	945.863	5028.124	178724.711	5149252.547	131070.043	11435370.489	16546.434	244744190.105	4163.929	2269742.365	51606.043	3595218.233	21489.228	1131178.445	33899644.512	3399182.896	21752159.068	201335.339	16256.456	5860.248	78729860.021	23131.031	6362.647	126646838.935	13258.349	430392.729	225897.317	53440650.889	974042769.674	248651243.829	240200.641	861023.087	14301678.722	12245156.763	13141.956	1617.644	324993973.722	69051.802	185883.88	16109.901	26505.666	49609.674	32406876.838	11075597.963
Control-58_43	221729.462	1420.934	27616.492	302864.447	593797.163	1146.687	3810.426	188749.132	3481238.175	1233950.95	10480178.861	16906.394	131830320.047	2678.155	5045057.119	75257.72	1461005.767	47917.137	1512870.523	28335132.044	1907688.749	20621593.745	953558.361	106335.744	7385.806	29355920.01	23769.814	8508.993	93717226.558	8905.07	681292.622	199380.156	76305250.999	2512556391.89	187911339.471	137607.987	1005698.067	15439947.889	34020767.693	11848.227	346.245	247201212.571	68650.347	179734.914	28102.817	27160.112	38606.264	674862168.669	95696287.533
Mild-67_44	233668.155	1862.381	44373.538	350076.386	2315616.97	1452.624	3779.33	202063.378	2277209.23	541642.484	17997719.085	12681.383	277830340.718	5343.206	1743249.207	77681.578	1170547.977	56582.309	983970.909	31911753.278	3274735.528	21209965.162	467081.197	39993.92	7233.562	46101764.649	26385.632	8502.581	116583434.131	16641.868	463816.026	259940.769	61620708.589	1033175674.339	206959442.244	279933.714	537808.138	17179659.925	16299676.012	11782.557	383.316	268685976.063	80800.314	191968.867	15456.122	24137.712	20152.941	63629693.404	15071128.727
Control-70_46	199047.742	3864.089	33273.932	487084.183	2910668.899	2157.006	21843.141	217398.443	3394084.32	1926322.852	35210381.39	24726.442	282495793.57	7956.792	11041523.047	72798.741	7176507.294	52955.164	665923.992	32292397.516	5377473.295	32901093.713	1447681.814	90674.148	6659.819	67579956.004	13311.022	5789.536	109703456.42	13566.278	756161.545	469192.184	35591910.948	2173940655.399	183497013.729	259114.97	1988802.909	18973871.826	7517355.96	10747.389	1977.804	280729102.799	62259.933	150204.392	14845.734	26073.543	22032.394	144063719.827	44143248.18
Mild-79_47	176382.168	1307.768	36476.135	211694.951	1464231.914	1227.79	5110.897	180716.64	15222229.655	180689.88	12246703.582	15720.183	173189553.538	3138.878	2026719.427	40127.25	7797136.258	12961.314	1559689.138	33471472.247	2543383.473	23655926.477	298414.307	38492.628	4857.838	45111973.011	24521.863	4610.618	128752679.143	10798.827	356629.168	218653.52	31940931.196	293819508.416	170492124.129	610851.676	619897.431	15545917.753	7966964.489	11738.526	458.22	315964120.437	53248.771	226865.919	16791.82	24386.159	22816.545	56159477.179	14955090.808
Control-91_48	212242.534	1489.445	42383.242	300250.197	1098706.236	1653.678	5322.312	175477.023	4285211.145	145344.418	9099149.037	17795.729	309695276.66	4636.453	3591842.959	38478.716	1962515.017	23932.664	1581253.167	46611991.024	7422824.651	32334985.751	197453.797	13443.165	7013.059	75701769.28	22882.937	6527.955	157638402.358	20341.975	822237.783	362565.017	53648488.122	1059857678.648	253198206.734	632920.201	2472025.08	15217294.309	17932963.871	12120.986	703.904	255585427.765	91592.221	167258.79	12429.745	23126.124	20378.67	27856668.338	11518622.032
Control-100_49	323099.186	896.812	42512.889	667661.293	776960.982	2165.324	6470.454	198698.988	2488973.064	558823.484	16484021.913	22493.468	26798537.71	3428.226	1938135.113	13831.834	3170947.739	7257.472	689624.084	44209727.329	11092768.651	37066395.285	497633.469	86431.739	11206.52	69979791.86	31647.215	4577.017	167596032.392	4456.308	383208.775	154125.661	39635234.31	574876525.043	245516278.947	346289.366	1145927.818	16122086.61	14018955.244	9736.329	1542.298	383540760.675	58397.778	202185.016	11190.812	19927.699	19268.579	15322711.101	13482252.409
Control-101_50	298903.13	4218.526	63533.558	518226.992	921265.865	1858.279	6298.597	193780.776	3328152.443	2023725.871	9957396.044	19869.298	365659891.465	4219.268	5976161.484	74514.556	689958.205	30720.039	827564.226	35160022.294	3772347.893	28430696.322	1529552.575	566779.516	13650.612	30678544.842	25379.45	8672.515	110423444.539	17305.368	581553.356	312886.152	66535006.902	781533759.715	197409184.74	174263.716	1149647.734	12422615.234	16799559.867	15538.99	697.785	452190004.481	134762.352	191283.607	17964.843	26087.7	25526.49	42706950.878	34407104.713
Control-102_51	187624.345	2243.393	34131.439	337251.925	865195.384	803.006	2931.847	188323.015	3373176.011	146706.22	7435778.064	18671.886	171856675.684	6200.722	3313456.156	86853.215	5842825.074	50328.494	864583.667	42738536.893	4466476.782	21060432.553	207022.711	37066.167	7400.416	53689716.329	23462.244	6181.937	135199232.466	10231.07	769961.347	259409.376	30765148.351	556322619.18	170846859.388	143119.08	624950.673	22590814.146	10251115.476	10009.532	329.482	311958449.002	60746.496	229655.317	9642.098	21479.788	19743.783	22050356.516	5408108.997
Control-103_52	150224.117	1909.626	205849.144	196137.563	NA	3183.345	8295.712	189811.833	4723432.881	392457.233	37200276.204	10761.759	20140671.781	5717.164	475568.825	30923.958	91525077.336	10091.528	556428.604	20435137.501	2653133.161	19199377.317	981656.019	19857.947	5253.591	47749385.621	20722.56	3876.469	82521706.142	1878.26	714008.144	489187.581	57673072.289	648403655.736	181670457.114	234185.817	637107.63	14973110.41	13170001.296	14151.421	394.741	585547025.651	93503.092	186310.559	25107.277	81553.822	26050.626	25421842.202	6927215.901
Control-104_53	255107.093	1983.386	55350.316	380731.887	2206843.937	1817.22	8703.333	229444.455	7128351.284	979206.852	10823011.017	18396.37	302395608.737	8579.512	3532594.878	85398.241	1228190.657	48589.995	533933.172	40882493.813	6889517.191	32021848.899	787147.701	114424.208	9784.897	64248180.854	25119.532	6014.823	140783216.762	16664.016	982101.795	403515.018	60398071.788	969005568.968	214426832.991	331829.465	743811.942	17741076.654	13919157.938	10955.019	457.32	364384499.796	42804.353	210180.969	32716.88	23257.191	23028.431	99172855.756	20131774.513
Control-105_54	386601.779	2796.749	47479.254	513695.457	1650783.974	2162.581	26488.335	270541.123	12512992.139	1573571.81	14747684.898	15501.518	395369847.696	15620.038	10634132.24	44014.464	3628469.292	28326.426	506439.827	40140269.599	6178028.399	34055926.289	1199390.611	148426.484	7145.503	107086892.195	30601.044	6313.109	138768690.523	18829.225	612744.588	386888.627	66837049.749	1136068583.392	188129365.905	281599.272	1415523.431	17850357.075	13108175.982	14261.632	595.988	257996435.329	98055.288	135635.727	17581.331	22750.166	8464.112	125309323.271	21563057.976
Control-106_55	632256.581	3582.668	44934.43	245399.02	2856649.799	2479.607	46586.388	213327.164	5937455.334	109649.496	14296675.286	20387.565	1126722513.061	11829.234	28154369.103	88698.92	2892175.84	63658.421	1324398.501	47557040.307	8241220.232	55264359.824	145627.923	8141.174	9693.911	105768433.265	46954.261	10351.514	165594713.973	52867.806	1083338.411	679574.937	152278474.439	2818722183.698	347257315.854	442124.95	7117837.376	16527644.962	42935804.993	13011.612	2361.463	345166390.373	62782.421	174352.331	26809.418	31713.941	19643.266	245664035.153	56623042.945
Control-107_56	433240.451	1881.223	68631.236	471641.611	1540827.436	911.058	11402.202	214647.33	3144635.524	1455028.069	9446352.914	17958.557	336080801.213	4032.81	5003896.519	54338.299	6825658.978	30780.3	1670552.56	42380303.136	3919943.543	45123505.336	1086400.759	132571.591	8138.542	99508208.399	26025.077	8322.239	152716473.808	22218.848	597681.881	324050.11	32139186.351	726896511.208	231561035.395	335658.399	957961.183	16726771.937	12621931.412	11868.46	564.786	483299084.053	59355.679	205168.71	18171.132	25642.625	25452.461	297228510.854	187649236.509
Control-109_57	253144.965	1728.895	434457.047	1767435.124	1861734.969	3915.602	11806.718	293689.088	4199604.883	4401782.948	20706381.152	17106.607	52088196.269	10631.447	42186201.147	49656.286	1646888.283	23622.809	517007.44	82358888.385	4659983.464	30508903.436	3173530.773	975773.495	7391.599	57706363.225	29195.93	4238.812	284064702.125	3927.753	594871.038	298361.182	59538554.63	1396759208.337	240592324.235	180017.194	1307914.714	16529217.889	13831070.007	14798.456	527.383	544586806.527	124620.802	210470.095	12645.947	28398.745	26809.692	251597948.503	31604527.032
Control-111_58	456119.875	2601.62	73586.884	378332.35	1441504.596	1356.449	10284.402	202838.376	3290363.346	142920.23	12739730.9	18200.419	169476517.897	6260.765	5417858.278	29744.922	3368944.112	13286.701	786936.022	45394832.72	4250104.14	27921558.165	160968.832	35363.526	11273.75	88043241.732	27875.355	9081.06	161525937.311	8612.12	555491.328	260256.635	39814702.497	191174098.287	231259532.523	225905.56	859578.028	43656912.316	13554517.481	13702.149	604.008	321843664.151	49791.288	214156.282	13096.57	24703.094	22650.967	43303662.88	NA
Control-114_59	369244.834	2753.424	87102.456	490270.951	650361.781	1590.773	4134.621	214772.002	2625326.49	699968.532	7208903.124	14838.625	39354740.339	5360.899	4506928.139	39459.213	1430692.574	17726.897	525005.384	38201634.367	2935046.184	17525951.904	571921.64	111759.408	7050.784	39930152.31	23091.431	4820.104	141959709.637	5143.968	457747.239	218115.855	63123122.544	1034634036.847	231809057.022	182509.268	2013250.446	14334895.136	21693546.985	14523.746	559.074	247036003.162	100097.765	210416.694	20749.356	31520.418	40223.377	18427785.049	9487598.646
Control-115_60	211483.326	3564.229	129815.492	468156.293	1710806.529	2324.773	52318.741	245133.913	3238383.682	153693.829	23627703.485	17448.738	253993180.626	73715.028	3602599.001	79277.745	5295525.468	63897.631	1674545.928	67787119.593	6368882.966	26489038.963	188343.783	33629.849	6243.325	84299198.551	25436.896	6309.535	216558024.04	16450.32	271642.292	277596.92	52041801.862	1113278793.923	203907569.638	319081.55	1022658.019	14737104.962	16475453.267	21249.478	2275.037	332267837.652	173296.802	234302.82	12501.356	30254.864	29921.41	42598061.453	25672324.557
Mild-128_68	262470.51	5404.43	87802.842	275912.784	NA	2202.213	16464.389	215802.63	5354761.766	270186.204	14718512.514	9652.839	528329204.315	16078.941	2553510.918	23044.695	12612913.738	12102.1	2883773.987	78932011.111	6784734.126	25993994.066	228320.556	30097.514	6765.37	110480802.405	20229.225	6815.216	285368847.721	22580.438	665245.705	948800.662	34904140.069	279133649.917	227584263.845	583217.435	993619.093	14609560.202	12977550.421	12253.984	511.139	363967846.338	63872.942	202909.45	18908.31	27295.339	32179.704	17487089.734	4709234.357
Control-116_61	175688.644	2487.355	51386.098	288340.998	2025232.871	1181.664	2959.401	235306.503	12855114.261	203905.794	7312072.274	18726.571	164238132.372	5757.635	2743386.597	78264.644	5935937.441	36421.657	523320.477	48601087.289	2551438.16	21103133.99	210600.248	18420.372	4917.563	57397599.734	24007.66	5609.001	160995669.788	12073.972	334901.549	201201.703	29182335.726	631750434.109	220806893.28	193234.032	505353.89	14321808.865	8187065.449	14556.966	321.341	287139486.222	88095.319	205403.327	16578.832	31120.912	37374.045	130590224.864	24998801.333
Control-121_62	168459.529	1210.946	30418.869	392185.063	673477.242	1140.287	6202.779	207159.789	9080416.228	170455.424	9256235.347	17822.546	89580369.309	13427.008	2305957.068	51872.844	19920754.176	21275.346	793880.119	28965727.747	1800116.246	21624413.826	215368.938	37494.7	6497.236	99421684.75	25848.877	6325.123	127759053.95	6720.233	407680.358	194930.613	27649816.936	424681433.897	181918702.282	299866.897	493199.758	18846323.838	8732751.478	16026.29	595.058	257936265.505	77426.648	206359.433	32305.468	37962.294	69903.01	41820090.119	8995270.044
Control-122_63	293350.844	1036.349	44074.219	339945.268	738843.429	981.897	3973.402	208162.177	5164510.813	173284.326	6611362.905	19927.614	139107763.667	13319.182	2205005.546	92828.087	7905300.968	41532.534	926886.183	57385885.737	2490530.889	25692497.506	208462.484	43434.19	8018.717	111551431.404	24561.28	6526.657	195999545.927	12719.266	481896.58	265917.623	61291747.508	950094371.992	235293271.417	265902.096	786186.927	16264059.046	26007879.126	13814.999	1302.418	314290124.523	90297.539	190754.782	15252.185	27780.463	26810.593	23554073.957	11798537.666
Control-123_64	118972.441	3004.497	52731.957	298863.706	2052859.744	1148.644	6082.563	219519.514	471762765.734	281077.908	41936488.972	12992.747	116670133.231	6100.228	3159784.283	67150.891	6905264.453	34672.529	710505.631	44394643.225	4441022.846	17079498.955	278819.675	42336.929	6019.1	66586302.765	22642.511	7103.813	134483297.745	5806.733	340713.06	490331.451	178926756.648	1108923761.556	180660736.575	223982.527	513618.42	20496334.395	50748531.776	13498.821	733.871	359451606.385	71344.748	207672.392	36852.087	26213.149	16589.363	126561855.867	23366236.011
Control-126_65	130793.767	4309.107	147572.89	731223.951	2519276.083	1734.854	54813.617	266529.177	7738884.973	509497.029	16601058.907	11934.301	456206874.035	8042.082	16831380.991	14693.81	491544.639	4651.647	161877.106	54571620.509	7712632.082	14813164.133	430473.024	48804.845	8710.652	33663664.075	35526.512	4897.409	165445826.582	16645.992	873531.53	413823.699	54052770.999	1372396575.029	202077069.342	94602.989	909824.342	11676030.726	15733065.094	15575.342	1617.454	280253727.625	50302.061	222512.347	16456.856	25536.092	31011.919	71589976.34	20360022.333
Control-127_66	165274.277	2043.131	28672.733	142283.045	1807131.845	1187.248	2891.063	175310.351	2558818.542	252691.629	7292091.477	15777.835	489993215.771	8868.485	2414873.432	17984.532	2707011.711	8215.144	1639589.08	23892580.565	2111411.18	25614006.907	260915.372	28481.024	6126.931	108348456.521	24101.54	4131.072	88111890.845	21897.124	557655.899	399631.871	35299726.668	621226052.463	202818720.135	251360.82	673796.652	10956997.708	9278792.145	11609.808	520.428	189523051.246	67376.782	223922.203	18462.149	26914.066	24783.631	30157495.887	10023974.512
Mild-128_67	384341.338	4256.872	32115.976	338154.959	1957387.282	2053.997	63837.254	223664.598	2863810.133	230266.631	19934532.596	11804.472	542852256.886	13527.766	2021072.154	47599.977	5844367.774	15710.07	3067495.713	90158806.102	5980957.687	34738780.92	196847.766	29840.684	10208.985	116429485.771	24782.654	6402.137	316884274.085	22433.246	720662.778	619884.764	37518222.017	325768454.587	253098070.877	505399.334	710802.064	12550760.339	22701763.202	12007.28	595.08	500116076.741	72494.474	217353.291	10963.266	24525.002	23425.219	7470351.748	4097250.223
Mild-128_69	297135.9	5271.961	61953.102	397638.805	3921378.822	1978.362	7908.469	216406.255	3140046.844	204615.766	10810015.954	12042.479	603138797.357	12953.539	4968750.067	37935.024	8070098.635	17984.537	3355676.23	48339743.598	5609469.651	22935367.42	206034.968	26386.479	7231.022	85455641.701	22358.947	5456.482	178361716.703	23919.801	419215.411	495727.317	56755393.812	488706160.021	185308769.468	356267.941	806349.843	11885759.167	14797021.01	14479.545	811.613	322906227.679	80013.57	231224.78	13277.447	28860.279	34721.74	19642305.829	3852170.804
Control-130_70	192142.731	1588.94	22240.938	387472.341	758337.721	783.01	3259.532	212568.876	3820624.672	1005297.783	7747680.509	15901.179	32779700.205	3862.589	4026705.946	64855.489	6192801.666	26198.651	489227.319	32673491.449	3194779.583	23820488.086	845265.923	134740.224	5449.918	46129332.769	23063.29	8489.869	108437664.788	3016.106	291469.769	224229.083	63400219.768	869143943.575	162404137.295	181552.319	575929.494	12046871.69	13372560.25	15046.094	511.694	220753611.439	86873.596	240760.066	25882.189	28501.725	31334.356	68289264.11	7216696.189
Control-131_71	157641.18	2220.464	59905.016	162250.974	744343.684	956.858	2638.098	208238.322	2917951.25	61827.891	7694417.072	19515.244	166719915.432	9195.419	4239202.145	87024.955	5002562.884	47085.471	727521.232	36571767.998	2917831.58	25246635.101	126057.3	7156.821	4490.484	96331754.525	18707.824	6115.1	112110246.979	7592.028	390826.823	219816.521	32757905.677	517801825.469	235668281.675	219996.222	773585.173	12794054.769	8026232.456	13989.56	412.35	176341576.347	69643.799	206743.513	18910.012	32301.912	36954.427	34521821.072	8149319.748
Mild-133_73	250094.349	1767.609	32711.979	231246.09	705067.131	1449.35	12632.356	229908.122	2797523.02	101396.541	9063751.239	10660.414	242936446.897	7243.856	2688457.055	68904.785	7620125.364	53534.828	2017332.181	27028096.7	2001538.474	27403975.811	157645.558	11671.984	7332.403	119836963.766	25116.517	10959.062	95863101.452	18497.453	457026.626	259375.012	26241665.75	420426870.727	191391600.151	354333.712	1361503.251	12807581.232	11722193.925	12720.588	855.856	187239643.042	72461.101	194371.755	11481.242	28670.995	25978.626	15635467.537	12631624.876
Control-134_74	176201.931	4900.45	206678.119	598419.075	1757749.332	3419.584	5098.571	251692.203	2668855.999	207747.61	15654678.148	11486.72	302676334.741	48030.755	4430812.619	21630.385	3222796.079	6283.866	1542895.742	46010147.695	3789955.143	17053881.789	215619.849	22157.643	8252.858	66126255.473	25347.413	6045.436	145742609.832	15427.465	555649.852	397808.694	32559085.786	549502309.226	169777670.274	126996.653	541599.993	10134981.03	11742150.004	13492.674	504.064	217678158.596	76010.498	246058.589	20476.4	28836.594	28491.518	41024670.786	28564616.254
Mild-137_75	177810.235	8674.921	32228.237	369727.735	1203795.353	1610.739	4858.924	201973.958	3040616.251	144849.729	10593615.481	10648.579	217546977.441	31618.825	6547144.81	101427.696	2428858.094	60390.907	693393.946	44082098.823	3326433.063	22402570.549	156391.101	33000.455	6191.099	83854374.768	24841.032	6690.864	183489470.406	11828.09	662269.865	463442.293	46340685.509	1017333005.059	228284184.99	407382.449	642524.182	15599758.098	21941058.352	12642.657	684.726	453570167.181	86063.437	146825.69	22913.735	26518.45	43397.343	35375203.077	19671420.74
Control-138_76	233383.884	1595.282	32094.714	306276.017	365913.539	1059.594	2457.408	203074.455	4897621.225	235340.151	8629058.677	15380.603	124781984.04	11341.723	1971900.821	26220.906	2441817.834	11389.777	1050881.651	37057036.918	2175352.156	22022468.87	239977.307	43990.902	5936.773	65991236.51	25244.55	6422.87	147243196.038	11667.24	485118.386	175668.278	45475660.641	504334753.506	194368550.327	177035.447	646506.366	15712539.442	14177063.372	15451.557	465.347	246699354.252	65647.891	204064.966	23532.184	31675.638	41859.584	27025869.035	10488161.481
Control-139_77	190563.797	2005.783	22288.349	360408.852	928603.717	2314.789	47284.086	182846.228	3350488.076	416324.859	14143197.388	14971.419	367577281.865	5443.457	2750681.532	40795.173	10650154.022	23500.152	547979.854	22727857.698	3367539.026	26475183.374	432899.288	99077.644	8916.225	73862227.765	27343.077	6321.025	85377661.791	17510.565	516660.291	249285.307	107703034.426	627933819.478	170039940.722	379563.653	461514.711	19789529.985	30108208.154	13547.774	714.171	230641010.839	83468.863	231526.973	37050.303	35175.134	46380.336	64023457.858	14865951.908
Control-145_78	352863.445	3579.326	74908.096	247150.124	1363044.401	1086.306	3857.017	208235.998	3198540.16	122133.097	5829067.255	12297.941	165749347.84	13251.536	6226404.363	75801.416	9829715.59	32259.701	522206.623	45818197.541	2690178.244	20224889.721	183388.916	24864.576	10493.417	51127612.488	25395.517	7806.177	127803301.471	11716.557	1723250.389	550792.284	28733120.309	368038453.333	170475633.913	143479.032	906925.445	15918797.792	8504937.036	16088.04	636.691	342377154.207	89777.15	205891.924	14083.796	29931.888	20041.58	20014814.674	9525967.691
Control-147_79	308751.555	6897.89	24574.235	491973.711	2441178.49	1671.644	11546.715	219188.45	5071573.209	2258353.491	6900911.577	16178.406	238255015.081	8436.092	7007445.91	35356.69	452916.822	19152.557	1058138.809	23278638.404	6734804.321	24171940.946	1639271.772	253169.349	7281.349	61985808.221	25647.252	7501.863	81803164.637	12457.003	384539.15	563642.298	56624161.235	611764886.592	159275940.848	197915.141	660489.455	11219103.94	17907155.002	16562.277	727.63	321300158.182	71143.844	215892.999	23675.6	28644.995	33050.311	66746395.451	13330172.625
Control-148_80	219814.498	2134.175	101847.459	257183.495	NA	1761.425	5627.741	200691.24	3940500.854	67876.27	10754289.543	16589.427	283769040.402	12699.236	3818306.51	48337.439	18526642.473	19016.874	513430.655	36058438.763	4981539.585	22088069.027	152813.547	21026.903	5558.883	82413767.001	21853.464	5590.482	128978920.969	13234.16	367445.269	204209.436	44336603.789	856076584.631	187706145.416	268067.252	552778.668	14309312.901	12064792.652	14767.252	890.735	296675391.475	70907.128	201554.071	24337.851	36411.557	40991.219	779582061.768	44605634.03
Mild-149_81	399082.02	2695.816	42646.704	195454.236	1547723.896	1326.874	5936.114	200567.74	16577976.448	291201.995	10217036.64	20303.817	203213735.264	11975.75	5771999.327	42295.548	11293011.241	36124	868286.299	41820971.721	6467082.777	23614565.166	309179.687	58023.755	7195.217	62955658.78	22899.46	7208.384	137268879.641	14258.877	779625.972	609286.625	43778483.886	400742994.631	193693773.622	239828.538	763786.878	20497905.379	14604987.647	15901.3	858.764	346923474.449	91331.81	225660.339	47129.887	31261.565	81627.85	41418264.438	18128361.411
Control-150_82	169401.018	4053.186	52520.348	419977.683	1830480.786	1382.921	7084.796	222338.759	20898494.081	592658.813	23592436.793	17167.07	213219738.926	7410.768	6467565.895	57146.622	4789255.66	32986.912	615273.068	48964589.703	4757065.385	18324638.626	507942.694	131425.606	10478.101	59682141.516	18465.678	8027.712	129412517.124	12245.682	496499.784	409722.855	57073007.22	730867668.317	158040319.757	149576.075	690061.295	16908916.852	16456255.677	14072.281	848.582	379751340.09	80906.147	156955.025	27460.792	27760.281	18492.382	87693323.058	8535493.593
Control-152_84	202637.489	1604.919	39957.631	271045.761	964501.001	785.274	4254.318	200466.511	1835659.4	555130.61	6763588.313	21667.574	196421946.234	7071.54	1912685.177	57022.235	14593838.341	37388.824	1138441.855	31133654.376	3070418.168	20615165.17	487936.695	57001.575	5714.506	51340940.445	18093.757	7936.458	121288715.788	14474.53	739442.014	273151.258	46653002.365	797514600.806	163134714.631	148369.163	676760.731	14390189.649	12222956.741	14803.072	538.271	275727685.03	74714.3	182829.77	14179.617	30653.148	18737.292	85029076.059	20611298.329
Control-153_85	152318.807	1265.164	41901.437	388388.534	323129.611	984.038	7900.376	221717.22	3768759.159	187652.466	13456632.632	20970.195	93028698.094	16388.67	1592724.884	23990.675	1041636.928	15724.661	1099224.779	36804996.116	3779961.695	22083711.518	241364.581	36737.577	5042.884	97814399.602	42050.25	5200.549	144654067.757	5588.691	526476.273	323875.411	50922176.898	586385651.417	181082492.513	122454.983	597356.432	11159907.475	16651658.042	13662.094	1020.042	353936065.448	61151.775	209541.108	19671.193	25757.823	24305.972	23602875.121	7593989.729
Control-154_86	260899.731	1856.503	51074.279	217760.688	722946.435	1544.282	5717.738	213788.198	3857703.839	137849.132	8831389.32	20402.769	438186328.065	10648.081	1737411.304	50404.475	17034103.328	34974.625	1549840.993	55338010.58	3268964.897	29250565.27	183537.968	17500.604	8059.312	104702187.13	24356.625	7606.151	190557730.903	28568.196	504616.906	233713.899	29787482.937	623124185.536	270904114.476	301514.419	738628.17	15401133.884	9082044.158	13648.63	908.523	357532686.113	73681.73	210158.425	11019.801	25187.225	15078.899	89291861.27	12954268.592
Control-155_87	367772.392	2411.556	34944.71	188133.225	1928758.81	1042.007	7878.673	191225.559	4765995.519	168682.501	10000071.916	14145.703	350943496.001	5795.677	8911762.093	47945.404	11308912.875	32144.234	565312.964	39509313.596	5724366.733	24171446.547	199504.563	38067.53	9294.39	80464941.823	17572.857	4432.996	127403144.148	17827.031	588097.997	319367.93	30521430.291	301333682.037	163578723.165	165960.777	493289.502	15249152.68	10335155.056	12785.39	725.784	296997528.495	42220.88	266566.738	27758.413	26581.053	46139.65	63607138.952	9813883.168
Control-156_88	220696.739	1715.056	114857.87	702304.502	478206.57	1694.02	6143.07	254547.841	3062579.856	221098.693	11701959.886	19085.959	81083276.068	10969.116	3435100.377	57310.992	8232175.466	31842.305	742934.545	60811222.56	3707555.743	24921394.048	217585.959	40046.549	4675.569	84325563.566	22535.965	8392.429	192020768.185	5771.903	744526.649	191686.051	42516580.044	1096467256.314	224064077.406	183668.787	689120.143	11777251.218	11657813.125	13495.872	686.232	376662253.198	94076.328	264397.101	18629.14	25348.063	25400.586	30371775.962	16051843.947
Control-157_89	169269.6	600.543	94651.031	901023.16	788388.138	1485.965	34461.031	242195.964	1783637.773	973242.993	31027930.928	13604.064	30482984.594	4651.507	2604235.593	23590.996	1262767.83	10061.396	520430.796	30026062.104	2545871.079	19562517.527	763285.779	88645.08	5886.812	75442955.875	21273.986	7026.16	88389027.255	3433.406	413387.798	166528.594	61968174.61	1841968570.589	214633122.443	154495.412	1094916.962	11988619.436	17575818.147	14141.266	665.638	401432752.407	100438.373	269076.325	25701.807	24310.682	14338.235	69029494.997	21465053.498
Control-158_90	315619.141	1943.763	134896.128	262121.662	1257485.208	1429.382	4420.814	212081.442	49849619.477	135421.163	10083016.807	15531.818	60622385.441	10688.524	3666194.065	49395.875	9416529.553	43144.139	486980.513	52015008.311	4533351.099	24103127.246	202161.692	32701.006	5281.169	76146791.062	19621.685	5210.172	179016909.185	3447.304	553895.552	287404.645	35270240.266	439798544.648	204182099.075	296744.237	665771.221	18479591.163	10336538.242	16271.552	745.755	366899332.617	133756.17	246812.11	18619.736	26744.377	31097.781	32030896.04	9095628.539
Control-159_91	284937.21	5950.332	115204.008	1388020.585	2306325.801	1572.02	112260.22	263710.999	6818402.987	473607.094	24407136.792	27843.535	29761748.885	15019.352	15730992.172	54411.264	917639.38	15716.575	450040.642	50071771.081	6602751.368	18659214.428	404403.886	68713.073	11809.908	93778243.035	80894.34	6216.184	178899153.876	1955.252	873567.586	606315.569	73420514.666	875653213.241	268480587.328	141520.512	791373.228	12725819.175	23501420.577	12720.054	1190.954	347978837.141	84582.873	205786.834	16414.999	23301.792	13942.029	90761926.068	41000977.358
Control-160_92	321509.554	2483.73	90852.183	440911.134	1991144.879	1774.063	9173.817	203698.984	4100144.237	290767.71	11543932.676	17342.015	169369868.819	4768.481	9600290.81	5902.725	7716470.48	1320.618	1039220.853	48496920.534	5238141.182	33336384.607	292538.075	35336.965	10367.119	81799997.627	30144.129	3593.408	173567882.997	12165.224	803799.285	327953.628	39030225.883	394831553.811	173469552.08	57803.124	663690.671	17603061.123	12069920.057	13930.006	857.783	549423532.119	94807.562	226615.836	12809.253	23749.366	22741.25	73061355.587	25313169.139
Control-164_94	87819.164	3112.655	18415.678	296996.176	1317581.401	1779.566	7532.492	194120.851	2676519.716	144511.324	7348544.689	10923.129	188507069.827	18441.35	4432348.876	33580.097	1453806.341	30131.707	412226.217	29064249.074	3957131.835	11768816.683	201889.73	27477.855	6948.918	13831305.867	11824.184	6546.914	113250425.68	9116.249	305180.167	183723.796	33735005.892	420053220.37	174578468.005	35775.486	199273.845	21164731.655	15121176.126	15173.819	656.889	236863332.119	55690.217	201409.206	32376.11	26522.55	35961.042	29964120.354	11292045.722
Control-165_95	167420.221	3326.975	243407.199	683673.697	3013337.898	2662.523	5580.345	229246.633	2118485.602	716522.417	11445591.454	10931.508	55203145.657	6775.325	8607312.72	16546.14	276324.955	7571.316	184944.367	27918634.271	8093372.824	12451353.422	618225.766	159627.742	8150.269	16405040.049	26808.997	4392.457	97372881.269	3149.797	744366.709	461749.8	70479807.382	853812189.439	227374354.913	47222.56	482979.044	10257385.018	13425352.17	13410.593	594.769	332965191.967	58474.934	210079.485	23619.599	25749.6	18940.284	74468553.775	27689569.9
Control-166_96	243937.359	1254.609	53455.09	544953.072	935196.376	1519.822	63821.185	212938.366	2625782.273	153930.299	10817426.414	31772.293	84718257.402	9409.284	4639304.007	21296.344	2662892.996	46020.175	324324.021	39039623.561	2416973.848	19661601.14	223864.549	47330.317	8870.511	71495174.403	33543.271	4198.974	159456075.09	6920.908	410681.766	193976.921	72766976.162	890707672.98	232408582.496	97099.462	818553.526	12041650.231	26949499.197	14395.575	1093.926	267050634.477	75851.412	210700.394	6884.646	27337.169	13985.384	17833935.161	5811033.384
Control-167_97	178788.99	2739.969	75754.651	687439.44	1089128.565	1308.44	6638.557	256716.448	7674574.819	292469.724	7816542.757	17812.518	58226578.279	14526.39	2630362.821	66932.428	670280.795	31792.909	1035134.134	59158049.889	2886962.53	20956695.882	287981.156	29245.291	5173.102	58471016.837	18804.804	6726.481	168970565.922	4117.28	283075.673	242341.196	35757340.838	581084579.818	220792625.809	172261.755	569550.809	11518086.662	8952221.264	13942.063	616.51	203261775.127	66304.054	211196.382	15001.217	26725.549	21054.108	319720021.146	44095260.519
Control-168_98	183849.686	2521.676	173254.591	581537.691	1741626.922	5941.952	18463.221	213784.459	1648741.133	792052.425	16635544.414	20887.265	34685899.726	8455.059	9487695.198	52147.891	245859.637	25636.862	850545.427	21473908.478	7572116.666	16357592.189	663700.647	118116.835	6539.002	24890841.857	25945.572	7754.895	66910684.858	3136.069	936847.949	400129.265	83303698.992	635854702.603	104475139.662	84309.663	769777.646	14399709.812	29177193.328	12616.714	1043.804	133159035.849	64525.811	248764.25	15121.047	23241.015	12615.693	94431892.299	38919629.232
Control-169_99	211964.566	1871.955	74270.65	261597.596	1267339.693	950.676	8727.376	202274.52	5396149.864	60797.648	8519096.796	15217.871	106470055.594	7868.145	4747041.863	51399.122	5620911.283	81187.357	599048.095	35009562.817	3708050.918	20529647.174	142964.478	16756.225	5739.907	70219954.442	17142.956	5693.478	108001254.151	6090.03	386645.767	242842.392	33686567.384	384197634.91	203654587.131	174722.173	1544577.459	14851660.745	11158477.97	12891.749	1259.546	442185555.844	54193.179	180182.475	12313.021	20221.855	12022.375	74012336.229	22358780.476
Control-170_100	168893.476	3853.208	72905.546	384086.315	949237.767	1231.681	8051.033	238230.969	4777389.869	181274.927	14711636.456	14534.7	241060170.689	10363.185	2643087.868	38344.341	8911632.223	42546.181	925512.177	52193515.935	3671673.244	20715642.497	247795.208	40741.393	6551.376	88263109.027	20623.153	6414.044	186563771.293	16797.093	423008.451	251968.05	36091057.647	979312354.968	225144529.496	242208.078	509691.181	16566862.543	13194536.488	11808.642	801.376	301200731.6	71159.451	190043.576	11491.389	21985.683	12105.825	53929468.402	17867231.742
Control-171_101	311720.832	2424.683	42275.641	143437.245	1286164.333	1391.318	9279.472	201295.653	4419813.081	77333.301	8682397.605	20569.43	140162945.439	12657.581	2458105.6	80627.549	845835.931	56243.96	667713.081	40049008.672	3845326.839	25742104.558	168617.299	25777.171	10131.185	69462667.331	19047.585	7729.765	124387006.192	10070.964	519824.944	351303.687	31396122.539	699768023.554	247609684.98	146826.645	986645.763	14871120.745	9447032.636	15037.033	980.917	297275693.444	81910.011	190556.403	22834.986	27041.791	18851.082	18297321.448	6109267.917
Moderate-173_103	173107.13	2651.451	43543.411	280631.748	878253.061	1806.671	5789.825	201879.519	3626622.772	135120.954	11115967.269	10365.041	159176364.536	32325.234	2851108.247	48853.553	655279.173	55998.069	819275.909	52187080.599	6973686.446	25488609.943	194985.64	19292.386	10817.441	63074285.574	16228.915	9651.658	178344823.534	9834.451	480457.095	282076.943	61195159.391	1111320523.238	145329883.124	96567.705	580446.708	21049889.927	30989782.814	14860.939	1995.469	473363802.829	79565.427	221818.122	15465.112	28339.531	49242.736	12708905.863	7877334.845
Moderate-173_104	183541.953	2041.304	29499.934	204194.221	453450.915	1258.77	5693.309	180542.069	4980383.111	81729.355	6384709.381	18848.956	98623904.34	4739.145	2969679.453	67682.035	276991.817	74133.683	795524.29	38736735.689	6960959.124	24664595.287	187071.347	17159.394	8485.153	59500651.582	20170.188	8618.504	129861889.829	7802.833	549979.06	382836.582	31073256.6	625091414.291	168582507.67	194256.93	817086.743	16223833.017	11765268.028	25310.378	603.307	424553461.358	82928.708	210026.25	13759.535	28980.595	15797.666	10995869.907	6681440.155
Control-174_105	277679.652	1840.949	89308.008	460091.096	605455.139	1159.651	7688.125	221170.835	7626257.242	667769.236	9777485.687	21241.3	56949086.566	6214.462	1239779.62	41217.248	3933802.605	17816.671	486059.427	45898977.557	2123945.914	28133905.534	567000.623	92987.174	6291.601	74336148.067	23555.915	8447.801	157497463.982	5285.541	455839.37	209166.553	65010118.743	1008561052.229	230958506.184	113856.051	740187.79	12942193.325	16256803.682	14816.039	497.237	334666810.608	67573.669	192608.728	11748.572	31234.843	22200.684	56603133.164	24061963.641
Moderate-177_109	219744.951	7181.177	22290.171	399891.518	1951779.52	2631.95	18309.024	161332.416	2123948.624	2463687.008	9746796.622	16914.785	366354.401	5181.433	9964429.511	53150.193	421699.93	24108.81	630595.526	22377791.97	10052743.183	26060341.841	1813706.906	292901.259	10474.695	44079405.077	22263.451	6829.909	95404364.973	1380.724	648121.011	376630.09	72699096.703	1225531766.255	142877825.229	174219.526	664103.58	12235311.064	20944005.342	11879.49	1447.775	255312286.7	75392.34	226131.821	22970.589	24656.132	15426.203	67629775.831	18432819.938
Control-175_106	165041.775	3716.519	93210.894	393305.022	NA	1171.664	54997.134	205274.696	9489201.147	853413.865	10273887.548	19345.834	45642692.993	11165.816	3500676.832	37278.919	1210420.603	25508.993	658681.043	37858201.206	3628141.08	23450504.66	701386.658	108093.68	5011.956	78542211.751	22133.731	14674.374	134084665.097	2684.131	375724.257	347556.444	65977785.866	1355794503.546	224198824.562	237791.796	1065507.733	29526318.422	19995663.148	21770.31	1016.304	253821187.437	93396.905	180640.843	11843.988	31915.667	21552.62	123585758.806	41561093.574
Moderate-177_108	166314.492	5137.792	34347.694	497383.956	1765140.833	5512.829	28998.898	186813.407	1939687.78	1112234.104	13740617.82	16606.434	1698437.738	3901.347	12918507.154	36588.344	462016.91	13659.569	787639.249	32993099.068	9049645.221	26666716.401	875838.308	146135.398	7163.842	54370495.151	21467.802	5599.661	137596573.282	2772.609	462099.139	267154.614	31133400.869	633810973.856	161658524.364	268859.575	621833.398	12549808.151	8448647.393	16955.642	700.564	317865634.694	90448.588	206464.072	6270.19	24952.761	11927.454	64163326.558	20531401.354
Control-176_107	183465.933	2400.256	55668.948	178827.969	1587170.993	923.587	4849.22	172441.456	6828013.894	111339.133	7793185.209	10220.379	261701385.456	7973.727	18458679.375	50924.576	9209709.52	52158.823	451769.778	54585501.446	3554060.844	21989508.712	170389.271	27757.597	6655.296	41465306.68	14565.563	6732.351	212689133.825	13215.863	488515.484	297446.538	36925065.146	355985331.63	213401251.154	74171.96	325073.877	21514353.957	16226024.885	16028.424	997.816	324329895.882	93963.394	189685.493	6025.04	29309.467	16195.205	27048628.284	10480178.921
Moderate-177_110	312932.486	10685.179	43532.18	680936.517	NA	2393.629	20324.473	210370.205	92754662.306	191664.681	19334477.323	20703.543	292930676.307	9558.587	5685987.656	66129.523	2824134.246	43219.301	909910.127	38045454.023	5572648.9	26246723.142	742626.092	27038.907	9074.389	56336963.228	29038.844	9137.583	141760147.302	17101.935	866384.229	557084.556	265314236.181	384253608.613	144260320.571	208295.398	815495.392	23263757.025	68632029.821	13073.477	1026.647	236034064.456	72543.981	239194.146	12325.778	30169.224	18566.74	22567464.036	9081920.044
Control-178_111	342829.483	4037.51	110543.858	370749.905	2114598.453	1439.227	7771.063	216244.902	2544685.857	1122299.504	11348738.173	15340.062	101578956.357	2105.552	3343184.317	22933.342	23273245.142	15394.35	719071.031	42217286.036	5158857.568	30051924.458	955368.717	155255.663	8786.384	55104281.502	20688.982	4491.959	133742950.76	9498.757	1053324.349	571230.125	69197343.099	846642392.451	190817409.118	280990.944	1258255.288	14293304.951	15338046.801	14412.028	553.784	275941947.431	120830.825	219002.443	9894.275	32123.749	18981.891	58845694.098	14913463.025
Control-179_112	199075.433	1897.437	39476.479	250914.427	752857.397	1367.376	8072.453	207671.208	1250050.024	108894.152	9079090.179	13656.111	19939970.58	3666.353	4436625.677	52042.855	550455.306	53521.255	904691.005	60763587.902	5345601.163	18514582.331	165360.108	23558.904	6718.118	57053945.34	22254.888	7172.084	145027980.302	1173.65	565386.78	276329.212	24113403.789	584587140.015	222342932.624	146491.654	1283862.533	17023287.127	7095982.273	11918.229	527.027	305496583.117	95883.847	193387.655	8434.43	24184.393	15076.129	36906965.757	14643709.864
Control-180_113	274649.094	1415.757	57749.796	495832.215	986722.532	1079.239	9293.347	234032.717	3579190.944	227301.656	12843154.058	17771.216	153334176.853	3003.793	2355813.975	47776.038	5125968.761	28825.2	1856716.174	48030253.229	3601797.604	25660632.027	269571.026	32773.705	6216.009	77115557.436	22435.42	5202.959	142008655.625	9503.704	336938.175	192469.12	60630109.708	1079596659.751	212718866.938	297782.45	554497.997	13175036.358	12192736.086	11253.578	430.852	324990588.291	48266.487	201774.557	13859.466	29562.315	22740.025	204237555.234	40201971.031
Control-182_114	229721.857	1175.189	49053.156	338253.371	849485.604	1279.753	6915.621	209042.741	7754438.475	407079.602	8219792.761	17794.824	87127771.817	4477.702	4826811.704	51284.946	7831028.722	31590.524	656105.102	38316215.805	2758030.875	26586174.618	381731.431	39534.399	4988.42	56461049.874	21925.606	5784.766	138238017.564	6746.828	395259.605	195644.26	62069986.216	886646411.577	207818051.793	248011.776	486092.762	15684016.002	22755290.088	12582.545	701.235	303825624.722	88496.508	194098.026	11261.377	28801.009	18239.941	65956003.794	22459363.968
Control-184_115	268251.137	2523.55	100021.768	346355.48	683857.44	1423.177	7172.529	201065.798	5376749.327	595451.201	8908390.096	24700.308	72082571.694	5211.018	3075886.025	41301.271	7160437.645	15431.715	583815.839	33275724.693	4249749.847	23642699.406	515565.897	51946.969	7609.342	59282662.898	21917.317	4192.75	127940745.171	6074.216	423678.712	197341.673	38984978.985	1000099479.818	146395768.694	93235.21	789385.712	15364942.292	8751306.901	13371.322	700.996	251858743.243	107316.59	250357.796	12317.456	28812.346	19408.52	103736513.469	19928619.789
Control-185_116	330785.8	2352.79	51848.635	225614.179	1243404.649	732.214	8622.894	186772.47	3313400.549	152722.549	10379965.867	17389.796	349852538.607	3004.317	4570919.948	71722.495	11932022.471	56960.006	750850.574	48131292.388	2426915.102	27242811.627	184744.447	13306.454	9731.712	72795638.135	19599.171	7497.09	165779509.931	27004.858	492666.556	263905.786	26045714.022	392418752.336	261521515.452	214425.514	783401.304	13446231.618	8769249.633	12714.481	471.397	316688584.996	78600.73	216350.803	11216.41	29458.843	18403.305	204378758.545	60950367.129
Control-187_117	94102.878	1436.489	50753.535	232721.116	1045281.178	1306.207	3923.585	200798.292	7468542.566	114204.86	11317580.519	7472.177	220601989.876	6693.712	2859881.214	96358.283	21876391.15	44104.246	114616.713	49769786.312	2528392.386	6220242.601	182857.518	25378.199	3304.865	6639896.866	6910.228	6963.211	169138787.207	5982.364	129648.824	97289.399	22768104.436	352023535.41	280208970.75	35050.869	185359.364	22028413.439	7374528.788	10398.336	615.139	375827533.747	85134.51	216705.597	7204.44	25518.796	12844.344	65757817.335	19304304.504
Control-188_118	233416.229	2001.854	66398.676	234133.445	1350319.483	1444.773	6980.12	193422.551	6961690.788	98745.393	10253656.332	14744.001	136372459.898	7749.019	2397894.55	84717.323	10746334.104	77297.52	1049871.221	43260801.022	3136265.723	21446839.799	197738.698	27588.135	5121.82	69775837.518	20565.333	6489.647	124964138.366	9349.567	528134.507	290073.219	21051502.577	425494268.153	231973302.331	333742.168	946122.316	15814467.84	6630737.341	10161.308	1061.692	288944242.218	91601.653	184467.421	8215.324	24457.404	10331.694	13754464.929	6961513.675
Control-189_119	228527.151	1350.107	44541.496	538450.617	836623.144	1578.104	20825.683	200572.253	15504687.988	578647.932	9791069.815	18510.299	80815240.983	6545.444	1593286.626	33396.581	30815692.116	25233	935340.615	33688318.086	2878073.603	18955750.304	582711.244	64527.393	4692.767	65463530.272	20898.268	6493.895	125815046.139	16014.081	371159.429	231621.683	67111545.088	861660861.444	188144747.792	382148.562	529917.962	14153973.763	15520181.016	10862.058	624.333	348397917.429	79166.15	205953.752	22261.239	30299.794	37923.325	352340428.552	60690905.002
Control-190_120	362198.529	2806.02	116235.05	306015.578	946203.163	2243.063	9191.598	197322.839	10182607.838	258566.527	12426460.574	18673.536	322240554.796	11668.521	11214019.149	81913.598	16173582.059	50629.114	438044.331	42414606.902	3457350.889	22737572.154	300531.594	43506.729	9394.451	87309436.951	20176.668	4999.427	125315523.953	16450.068	584426.777	265715.666	31345345.434	491738535.624	162580459.222	161222.432	729090.452	13678459.68	8868670.569	12634.879	928.168	304229741.49	103863.068	253130.066	31499.835	38881.591	103646.858	61526427.891	10746971.507
Control-192_121	196019.775	2673.314	47769.917	352680.99	739716.495	1996.345	6176.774	207027.713	4470139.762	115628.686	11408124.768	18753.139	184392535.996	14317.615	2701257.162	58240.058	1587351.811	41538.695	399603.054	41586460.391	3393766.764	18538168.721	171925.869	24047.084	5379.883	43999469.348	19813.696	5619.783	144490945.377	7277.974	339319.424	184968.773	66603797.794	1366772961.488	227857834.112	148254.064	497046.113	15643341.05	20303000.44	11837.384	525.163	369267948.216	80904.573	205918.515	13024.103	27354.547	23212.944	89678983.473	19962083.898
Control-194_123	294452.944	2223.16	27209.92	346422.006	947246.751	820.795	7171.196	158828.286	1248831.797	529234.293	6228169.083	21141.234	183341121.64	2845.98	9070882.584	57473.001	308661.028	44141.624	419990.48	64613161.799	4033482.444	19891301.908	466807.439	119842.091	5138.512	52645788.738	20035.687	6123.852	240123697.963	4029.38	462424.913	343055.595	43675591.961	891953110.717	196749773.506	175874.684	982441.881	14777580.787	17655201.691	12230.975	651.728	277890404.503	69221.233	232554.628	146771.944	29967.574	442147.203	30524121.806	10052930.638
Mild-195_124	333929.554	2016.486	68185.502	201521.698	1789503.233	975.625	12046.161	141774.892	3246751.93	375953.909	5318857.717	24199.136	37884014.862	1154.046	3787902.119	31252.717	2527919.071	24497.737	409637.194	33982246.159	4133307.781	28348805.049	352746.165	60001.887	5494.188	52464085.013	24942.794	5156.389	140493236.454	9239.401	414645.164	178050.656	37586529.316	717207682.029	294274444.007	167686.935	1048430.632	12738351.518	11570760.288	11282.854	786.893	427263912.402	57175.61	215645.583	12393.312	27556.671	17969.101	80233481.855	29664145.356
Severe-197_125	265710.903	1612.606	36651.67	555962.993	468373.752	1833.514	13737.468	188440.934	1940892.691	197677.17	9336376.775	20580.044	149971586.49	14696.998	4618300.147	40144.558	6602652.716	19273.998	537757.294	36743939.209	7564859.77	25178856.118	224234.118	25499.298	7475.667	52929726.144	25998.247	4198.187	141778295.583	7166.811	672072.089	381644.3	35184183.014	743864705.411	140627756.475	190072.161	800702.793	13157281.074	10462997.819	12965.047	1274.049	287904793.617	116785.968	209564.771	9698.02	30574.607	19345.25	64480788.909	15262096.434
Moderate-201_128	335337.88	7214.568	41267.825	545578.965	2786161.344	1726.273	10241.195	172613.37	1690392.38	565376.526	11853223.46	16985.256	349553026.235	3782.358	8628713.501	42796.153	6064719.596	25239.821	570187.887	38905975.211	8466308.895	23191933.535	493342.195	80471.094	7031.137	51791030.831	20737.98	7283.486	157331358.13	17740.024	772475.852	494943.898	53882477.623	1024410818.682	171716284.38	157412.471	912466.733	17476646.055	15907612.919	12474.557	861.885	301445332.988	67830.889	224784.006	9976.492	30132.072	19501.381	76941761.013	8310463.454
Control-198_126	229826.782	2210.246	294120.366	739960.3	1860660.29	2235.75	27949.146	174335.294	1798725.249	1555475.503	10006510.079	20440.146	92520392.688	4378.758	12193123.268	31244.413	2184817.916	51625.693	413579.992	31163158.64	3899255.819	16684813.938	1195688.779	216822.922	9075.259	62887983.153	21333.525	3420.243	129262610.016	9851.767	793107.003	386227.436	88775340.333	1384032315.485	222658110.315	121793.79	533289.252	12564231.698	19710617.489	12571.169	803.274	340990974.483	81755.297	218499.873	9374.61	29234.887	19021.65	168897186.757	54941776.408
Moderate-201_129	283053.887	4927.542	38907.567	232417.936	1474999.083	1918.233	10596.23	148664.119	NA	257581.035	1809570.492	20726.579	74756923.213	4210.607	317686.255	44564.6	1219159.641	16410.147	1021914.851	5715789.066	762435.632	27300304.337	271141.178	36624.913	10590.587	56939625.596	25066.32	3992.574	28745892.699	7026.737	675654.859	256800.773	20293097.255	187718432.66	45663238.483	167116.537	1674397.849	10472765.063	6908531.037	12891.831	948.328	85790251.955	72696.656	233330.828	11973.847	25644.261	20403.019	12276499.54	4166703.008
Mild-203_130	270325.984	3014.116	95290.75	634010.409	916745.056	1728.051	44448.134	171758.172	544573.843	964299.46	1565965.924	24021.188	15573521.771	11833.976	155621.934	39303.416	2751745.547	31430.33	2009787.84	11455698.418	1569842.558	22685991.111	784684.82	62739.786	6242.425	95386367.722	23122.999	6538.182	54710567.574	7645.018	545205.179	273894.794	22617571.606	254625440.988	115941191.66	237365.319	644925.675	10127955.005	5329411.953	13474.201	2941.825	106062417.952	88667.099	216148.368	16709.778	26779.01	20294.687	50003025.861	12652751.328
Control-204_131	263182.398	1290.351	103572.059	352188.524	1015939.129	2864.603	7596.732	185895.79	3413236.582	108617.571	47591134.748	19374.609	141735180.391	7581.799	2353337.703	56312.499	1707401.54	25235.489	457311.686	50012228.535	5091696.38	24403042.845	181246.12	16984.51	4988.18	33609418.77	20364.825	9540.972	135977155.994	7595.187	315346.774	242097.66	24934909.412	614157069.826	269383580.957	175202.376	678961.909	21853397.528	8529869.198	10193.412	748.999	353048510.034	61254.909	211227.2	8324.187	22353.589	11728.416	32829928.191	18183851.925
Control-205_132	251608.157	2632.961	50297	419085.367	1121688.785	1432.134	10414.765	178044.557	4080986.397	856906.495	9136585.959	17322.687	144916970.95	8135.798	3248978.704	62672.338	2955516.899	70222.001	1642888.261	44459260.371	4902187.945	23031970.14	724351.185	127160.852	5694.342	69207432.024	18560.282	5513.649	153170370.72	1917.128	434926.625	231535.36	52674984.898	1058606481.511	207011768.253	159910.066	584061.491	17586472.773	12432442.295	13179.034	930.561	201824250.352	131953.747	198778.151	21918.636	38622.814	48332.889	354819567.079	41509845.798
Control-206_133	230080.406	2045.947	140816.711	264191.551	NA	1815.785	10952.796	166315.356	363876452.894	116264.63	10400988.724	13818.603	23058907.851	15290.255	2860983.72	33705.948	1520359.28	22892.21	1912689.76	50448679.87	4059158.446	23014360.682	211415.927	25452.578	4515.694	53779254.267	18875.069	3990.445	134023151.488	8456.958	669849.407	419564.346	47852567.626	1071414247.63	235546262.833	193651.814	525768.033	18856549.178	20963304.001	11828.426	1560.259	315202160.611	93546.322	215817.156	15559.426	27320.662	42700.628	52568182.296	12434522.828
Control-208_135	259748.075	1337.691	67786.396	502936.502	1624898.219	1610.761	10981.194	180353.624	5411385.363	84386.71	20965386.236	14413.149	320403295.435	15384.893	12032081.697	51102.51	1067278.928	39487.198	485668.039	37260635.415	4456354.438	22462716.158	150987.796	17714.658	5472.737	71964265.99	21143.323	5781.736	138056098.814	6627.73	420875.214	201045.172	59855347.536	1441078621.723	333193061.113	229361.722	550223.823	15976959.768	19700810.453	10939.735	880.557	555247784.568	46742.2	213752.002	8836.999	28502.505	18476.807	103526714.228	27709187.474
Control-209_136	284600.042	3119.205	71821.647	330006.854	1083942.613	946.121	8130.148	185140.912	1414519.562	157735.752	3444838.702	16222.969	57439470.733	20388.032	1919413.585	54567.666	2452966.084	59442.187	667682.697	30461247.734	2459094.174	25015204.311	211809.028	14149.893	5612.206	62852557.129	19929.581	5662	103763870.954	9910.015	382770.846	193398.023	21497015.52	624394442.537	178844286.964	251229.499	1635994.773	11474724.69	5932538.711	11630.487	1041.003	242541049.113	67865.457	207637.522	10921.739	26021.61	15271.174	55438429.687	13657771.674
Control-210_137	234826.919	1746.258	59280.279	159120.101	1606676.337	1728.76	9600.158	141445.092	3419254.668	89004.369	10877291.915	15728.645	151219109.832	9890.546	4067010.817	55164.386	19942979.28	56980.176	814677.403	38005958.263	3747741.503	22845821.622	170159.205	22538.886	3983.14	64688815.075	24307.396	5759.29	125261519.44	7336.794	1187718.167	294567.38	27547104.594	556526977.824	202408581.323	187138.506	417741.25	18230180.306	9100347.005	11844.033	2356.299	356436653.653	75478.071	184349.986	19902.276	30811.559	36680.895	50315961.784	7972573.053
Control-211_138	307514.68	3710.574	72874.959	305502.581	NA	2193.711	8766.447	155345.027	10253332524.667	822385.53	12643807.738	14785.516	220015946.198	34330.61	3348326.108	70557.963	2869608.87	41177.539	343995.161	38022388.865	2842336.084	21582227.593	677705.517	164904.207	6478.16	53866098.595	20683.343	6213.823	107973486.119	11295.949	665141.433	408763.476	66651746.435	1208568966.809	141540387.503	253260.613	917849.52	14792422.419	22040569.284	12007.349	922.687	291614466.184	75503.19	201585.503	39387.653	28997.932	50432.787	122450607.166	11855783.092
Control-212_139	306610.366	2188.392	119867.397	419193.276	956091.887	2428.077	11245.638	174108.224	6148784.109	165986.717	12565637.852	15742.695	373114906.911	18255.196	4970275.178	24582.985	4829755.444	20898.717	838408.351	86301633.466	4015077.332	22304903.912	194085.508	37260.926	7241.834	50404231.33	18039.12	4733.994	329531542.228	13708.027	391553.02	212940.759	38248152.498	1047082687.719	211910631.37	152124.498	881826.937	16418363.199	12401357.191	12524.81	961.99	389237468.894	86032.164	209266.518	8730.517	23999.559	15272.567	126796941.696	35888868.14
Control-213_140	65963.623	3868.408	71640.103	428279.652	803743.749	1105.76	10941.327	152060.087	2739328.7	497823.292	13793847.733	8772.104	2585218.806	1801.31	27804615.487	12442.946	285380.397	7899.969	176778.935	28435066.402	3572760.976	14086494.199	456326.259	56731.404	4973.906	19165247.515	12602.443	4923.379	97075748.792	1258.038	476563.847	239587.311	44465691.88	2555194931.323	198763666.395	29888.723	475040.821	13928421.334	10899721.192	10228.501	929.727	348052424.311	63160.873	194601.549	11375.011	25018.356	25691.335	378177897.54	70311064.048
Control-214_141	306111.41	1717.116	46075.213	290590.429	978383.099	1313.269	11151.331	165449.526	3643014.56	451623.251	11111121.713	17494.018	167477676.027	9488.474	3542217.347	36682.829	5498635.596	33036.195	866272.907	41172256.245	4275802.118	26219204.486	448249.226	62286.416	5243.444	56309987.081	21756.046	5867.976	140209371.611	8251.609	479983.632	289823.227	63254867.812	1182919577.611	165184823.732	196703.201	941718.682	13543198.023	29280645.169	11689.634	949.933	379216743.746	99346.736	214575.86	8295.973	23257.553	15617.005	83315301.877	19542056.947
Control-215_142	324021.673	3304.86	65194.288	470575.145	1562053.438	1443.925	18203.511	154163.768	2673111.033	180445.979	12466336.266	17998.546	75490399.074	1955.144	4391062.412	49168.813	3484345.239	26392.773	498992.549	41626521.726	2351634.83	20556428.36	205714.897	34646.299	5453.858	69167325.756	21317.585	5009.945	148699846.657	5591.491	570306.348	287634.995	57873279.848	892384141.089	283423118.846	246911.393	1801361.448	18661089.325	23345952.714	13030.255	1131.874	278730021.857	87852.945	211788.957	11586	25488.421	14783.291	90916868.821	19071600.636
Moderate-462_187	243767.009	2574.632	47128.762	485948.157	NA	1908.815	12917.217	145558.726	3849079.679	158265.373	14637939.598	26061.992	406003809.728	5299.887	4198422.443	146342.796	883297.249	69007.818	1241924.64	58614628.844	5753402.346	25630606.958	201801.208	17922.676	11239.375	94491072.965	26312.972	9022.354	212229149.098	26226.233	984741.838	378435.199	52856344.611	657133359.42	168275040.712	250743.745	480885.309	20394778.311	38997510.67	14484.537	1913.136	373662027.111	66594.01	339564.868	15165.366	27409.228	18130.532	47892911.166	18017830.54
Control-216_143	256894.505	1583.243	91510.411	574322.199	1099482.032	885.8	7081.596	160924.828	2383756.746	758387.897	21201316.066	19774.707	125630774.454	13878.555	2591146.305	70558.102	6392022.121	47836.693	525329.898	39453149.19	3573856.858	26037839.891	607362.655	80784.154	5262.469	48213017.211	23467.855	7604.15	150562878.72	8566.466	414816.206	185718.521	33948881.628	1463430876.814	217293082.836	210866.445	943347.551	24646303.402	9938717.352	14450.352	587.428	401025731.823	114126.513	195186.126	8626.703	24946.928	23438.837	119151233.418	21613937.233
Control-217_144	259802	1524.351	49976.939	473795.563	1013711.036	649.36	8739.339	162159.328	4526180.079	432592.826	6156856.974	16711.427	101036098.932	2539.972	3699807.291	63652.943	3838378.788	34991.334	288025.282	40503852.168	3559827.604	19196484.784	391145.889	59295.967	4638.841	45668187.99	21829.248	6576.262	128114543.315	5285.083	505334.286	213613.01	42658107.778	755995258.354	188493788.946	161268.756	745815.869	13983910.407	13349513.424	12934.493	893.248	379023650.929	72080.509	247613.659	14545.071	26945.777	28215.829	83533795.795	13212738.654
Moderate-258_168	360589.663	1754.371	52083.51	658454.401	1107699.916	4094.217	57315.393	158007.577	1534853.731	241223.101	12719646.238	28479.747	258701.26	9143.713	6346561.447	53132.305	484527.236	17596.766	333243.327	46916562.007	8508245.411	25248548.638	264374.347	25843.471	6230.734	45094360.419	19823.95	5405.716	177971859.113	1654.032	393800.745	214376.137	67022477.843	1594588256.474	161845465.485	126128.563	1331835.035	16396708.972	17880203.274	14814.235	1775.223	352178014.661	144060.263	261364.807	28936.274	30744.855	56032.36	27365893.593	13400716.891
Control-219_145	258184.357	2210.374	95350.853	348544.762	1296136.672	2394.306	15668.181	162035.879	2710377.511	140204.288	14031936.096	21085.453	260318136.249	1765.581	6078576.711	20302.94	8067451.046	16548.283	985292.591	33073827.962	5956031.035	20027899.842	197166.616	24273.542	5727.112	62433733.674	23620.806	3967.706	112277853.885	12588.372	590572.319	299321.188	85143690.47	537247298.01	200915345.874	130561.797	1291190.582	12802234.522	19982774.688	14252.713	692.965	344316832.756	80343.796	197884.029	11565.164	30792.481	22966.543	205180640.932	35666611.298
Severe-467_190	420238.737	1334.689	23763.692	300979.562	516240.566	1127.272	11224.706	145917.148	8090546.549	303344.799	9223727.605	20734.417	272550736.535	13079.129	2730255.575	115351.515	1045643.703	78264.729	2399871.255	59287879.506	4917455.274	26958252.944	334902.451	41268.624	7413.093	66297181.599	22734.557	8975.398	182744423.578	17666.253	434376.936	249839.167	48343915.865	788453468.596	333390620.763	451773.255	865739.182	14366504.547	45095948.319	20005.004	3679.055	299829557.053	74788.495	273489.857	15057.033	30412.738	33362.085	13446591.117	7226504.199
Control-220_146	333044.957	3618.73	137691.706	484658.121	1178069.072	1064.957	8301.125	154789.605	1766767.006	495454.444	4792255.132	22097.976	85615238.39	3769.638	2242177.979	36657.757	673566.486	16862.157	1138803.178	26057835.53	2204647.942	25545203.627	445409.815	49699.554	6810.428	72121975.425	23789.243	4668.074	91866319.642	7747.261	378952.458	282031.224	24670361.629	660597084.257	140776634.167	148675.117	648041.981	7953883.56	6652296.481	12773.846	451.075	145750164.918	86018.21	221494.769	6675.922	25366.971	18754.036	57152550.538	16200405.597
Control-221_147	463374.355	4404.21	64456.85	799126.545	2706988.305	3085.382	23194.177	156078.142	1524073.1	543192.136	15359514.299	15615.692	221546729.993	2617.034	12939333.249	22159.088	6061350.386	9932.22	825142.387	38436721.021	7614478.017	21260684.427	475201.248	74800.967	10163.413	53211411.796	23394.04	6296.334	150561505.868	13309.857	1175537.898	422066.144	51792154.578	1213424044.225	193295807.583	150086.086	1990565.67	16255112.794	12442554.768	10936.054	695.158	329929832.91	85993.687	240566.293	7573.144	26931.145	16479.919	53539771.316	19186415.47
Severe-272_170	267556.676	2436.802	47991.193	349070.552	736822.958	2774.738	33148.142	158164.09	113540260.373	211236.962	15375757.724	20857.601	75260032.488	8719.137	3044064.368	145870.456	780199.973	78195.239	2484063.676	50148345.23	4194623.844	26748632.862	271672.195	32723.754	7865.525	100821229.113	27780.93	9289.169	165989647.727	4758.184	579496.075	316477.738	36813082.324	575273967.938	223584074.4	386190.662	642943.978	21210560.968	15337495.062	13646.142	3662.88	373094718.644	107763.843	193796.144	7401.402	34508.47	17802.389	30616010.285	12635762.847
Control-222_148	213622.466	3326.797	107389.751	634923.438	1068121.451	1477.563	17902.563	178054.977	4223318.258	2583355.147	10659032.492	18715.397	174582363.798	2381.694	12368157.724	28109.22	2438649.309	11265.178	308412.52	39543247.769	4239217.744	22315706.037	1874422.3	232538.74	5972.306	52046534.265	24091.24	5907.862	118303264.669	10314.131	550465.992	249695.827	55546217.384	1288245952.293	229542871.071	178954.596	1583764.797	14121371.424	11745324.025	12338.848	1373.717	235760229.371	107375.701	208431.757	7753.003	28832.12	19331.376	132946455.314	33040467.744
Severe-272_171	301433.942	2161.837	46733.913	276415.493	806213.875	2858.832	17548.889	154612.308	136184746.682	198391.229	9604444.111	20557.123	265115175.432	11830.146	3211691.971	128708.416	349074.883	57684.075	848665.279	54808805.474	3625365.996	24605392.397	264309.322	37777.356	7080.545	70171219.75	29532.256	8898.71	163922925.641	14046.949	420609.611	330290.691	39946003.42	599790476.489	181345593.812	270003.263	791349.999	19378490.866	13823252.676	12871.392	2149.068	367210684.576	107069.417	299566.381	12099.885	32746.555	41546.392	27095018.444	6493360.075
Control-223_149	259876.047	2024.697	273681.823	1045288.98	1328044.506	2395.416	17075.847	182247.712	1553406.235	1983617.567	10858725.22	20495.621	60776751.701	4032.222	6095001.714	18604.943	8107728.212	12644.469	854335.273	38815962.626	3763557.809	21921464.283	1460558.638	260648.522	4883.152	47545510.545	29806.152	4957.647	158203227.899	4586.161	689903.339	262789.4	44330111.788	1689963588.04	223158236.469	152104.636	944013.24	12817243.903	11247358.952	46147.409	975.37	429776363.591	88505.348	216339.084	14257.615	28957.861	38217.701	122897789.359	61030731.025
Control-224_150	326703.819	4311.114	47512.693	131803.289	1888900.959	18540.238	13013.452	137381.962	2516413.673	85412.606	42758762.167	15443.85	418427233.255	2388.441	7232379.121	45532.359	38980941.904	91710.655	852436.147	47569050.871	7347078.791	23245547.366	103956.778	20924.856	5961.589	73377184.311	19643.917	4045.68	145575748.226	22263.144	662723.973	423506.107	37345414.14	341617931.922	189069773.223	230512.254	492081.36	13684218.513	10691687.574	35506.306	1154.607	343627166.731	62108.336	226083.099	8426.581	29480.744	31209.349	57232303.291	16478016.053
Severe-272_173	342902.856	2125.209	62147.07	654955.14	1026216.73	2043.001	10118.861	168072.33	135784270.091	553919.053	8700837.99	27184.736	82006771.968	12446.9	3505445.904	151961.336	5215964.371	52828.068	1136762.907	58430809.209	4494831.812	25319729.481	529834.346	77464.26	7475.488	44266612.947	28235.665	8491.084	201926817.494	5559.508	429753.832	253590.866	63252997.902	1222294033.934	229157684.385	133862.584	964590.292	20686762.601	19506366.323	24339.786	956.664	496275171.824	79996.113	294080.563	9267.539	37339.151	25639.495	97729185.883	19772605.164
Control-225_151	207045.679	1374.243	39519.674	202925.587	424676.755	1081.073	13566.313	138738.287	1709101.417	190060.123	5201914.813	13798.824	120819745.16	2134.112	2170921.846	95004.07	9425698.319	81795.196	754263.851	23741484.748	2583478.879	24073583.259	209469.364	14670.75	5511.516	52654280.848	18115.364	7841.179	82398337.838	11945.564	462133.028	203852.954	38337733.008	786961010.592	192389087.893	255785.584	546406.523	10009245.216	9496241.554	41204.997	1616.187	163212081.373	82429.063	218541.656	9544.165	27278.746	32601.599	67270141.315	12571688.343
Severe-427_183	377030.195	1791.375	54612.356	368599.408	888534.251	1068.611	23397.44	133481.376	4545647.226	145607.678	8208721.658	18910.911	187087455.398	4776.241	2136233.659	102346.523	660609.407	46846.714	2861891.025	73981046.291	4215906.043	24079339.213	209727.037	23139.27	5531.924	76750278.057	23908.951	5730.249	303122319.994	14000.186	426069.74	283526.615	30649767.918	501083403.394	316257811.642	332930.091	1213214.491	18427079.801	11946776.644	17194.81	3584.099	310684287.775	63026.471	265495.495	10313.439	26594.946	37094.219	24332891.548	11965376.925
Control-226_152	266906.805	1405.732	96554.922	427283.969	871965.241	832.258	14601.153	164079.817	2220911.482	218798.89	7094358.772	23345.404	183687928.597	3973.998	2996010.873	76041.682	4014478.071	76595.994	1210623.964	81281076.423	3079012.612	30285395.545	187169.294	28296.08	7779.132	88470341.917	23883.154	8692.062	314215857.215	12555.607	434726.591	257262.106	45041857.682	771705290.666	312191370.513	362816.909	878447.413	11359747.072	17386525.811	29115.37	1053.081	423840092.764	91898.221	234915.037	10347.696	29022.428	18076.923	39633691.441	4341826.638
Moderate-305_175	236033.759	3777.28	44064.631	366305.569	1824888.802	1522.443	14927.54	146578.731	3788469.515	150233.823	14470865.166	28062.383	300875709.367	6283.853	4976607.297	69919.754	689240.203	23871.236	2744178.564	43854935.288	6420694.55	29070915.183	190300.923	17250.432	6098.206	106177890.407	25917.341	6307.517	159048732.146	12158.732	627898.886	368983.897	31628922.774	585345242.067	182453899.022	158623.575	956251.155	24850019.137	12392210.18	15941.768	765.558	231429367.835	106513.45	289261.743	6170.951	32972.614	9955.88	96061757.127	24798364.971
Control-227_153	370906.771	1817.572	51609.153	523007.369	305585.073	1280.794	23545.044	165474.749	2377546.009	201345.789	11885867.92	20340.317	173170115.303	8448.554	1670263.724	33877.654	5830414.953	15507.596	814933.217	66313874.439	3966425.366	34396591.887	216501.228	37421.997	5917.083	82446568.383	23896.688	6532.697	258992193.142	11526.496	379468.785	196377.683	196982054.455	673757714.495	208537066.44	297390.658	800150.155	14041032.611	77727496.457	28354.752	1332.446	285047681.912	64732.172	207977.703	15466	33613.475	19180.469	25098555.794	5417853.089
Moderate-258_169	373312.012	1444.636	36314.9	419847.243	855074.262	1509.014	89617.395	150888.798	2190858.342	151009.849	10098437.256	17791.934	677716.053	2647.147	3857328.216	109006.855	366208.264	49635.974	576181.582	50538126.133	4274395.397	22769372.288	205198.263	19234.566	8458.654	70806994.678	24522.087	6210.473	131362242.355	2034.714	367344.293	220629.287	46010720.704	725575303.203	226170742.885	156285.705	762130.91	14320713.643	12963813.879	11793.409	1200.489	294401795.417	77312.195	257834.337	14473.343	30073.122	74081.728	9518772.322	3301325.327
Control-228_154	198888.849	1433.7	96131.577	677493.215	1165758.87	1614.483	15039.793	160822.178	1485073.513	775214.01	9313108.613	20391.116	43885689.967	2556.411	5973970.456	20109.989	523216.155	16650.125	369514.135	39140761.419	3391777.803	24476953.83	612384.767	91443.193	5711.013	69562415.191	24053.97	4600.224	131651744.016	3460.345	522627.466	261188.233	71972894.993	441963867.973	205514297.597	85372.148	1177526.123	15755108.234	18655437.354	29007.757	1046.583	298517859.722	93641.827	175938.587	13819.976	31240.436	13806.103	66465648.165	7782777.12
Severe-476_197	247765.98	3468.926	147244.674	712881.32	1194366.968	1876.46	190736.276	162205.215	2273351.277	220245.71	10764105.741	19986.684	239186981.385	4955.181	6737288.818	154683.438	1689165.718	44408.569	929722.156	42269232.874	4880940.258	20419665.569	223974.31	31590.117	8939.708	66755704.856	28339.946	6144.476	143974463.26	16746.905	376443.267	282822.268	49656941.48	163298198.726	264611475.453	305342.55	1385750.306	12219052.081	18333896.326	23708.974	920.308	219010374.808	91109.599	270819.852	8760.657	28489.402	11769.784	34207146.091	2604870.336
Severe-395_178	139057.906	1153.731	44994.6	221051.308	1264677.468	24538.518	16041.289	135891.413	2564664.165	133516.821	51138527.946	21094.348	113804891.971	5244.31	4121790.931	140558.587	428348.114	57764.629	842656.161	37463680.083	4174504.131	19111156.693	186574.015	17532.6	6776.699	85666492.808	23437.001	8402.259	132842684.166	6487.046	538900.218	260566.514	24916101.775	435553874.373	170702675.921	426287.619	572553.172	17262243.863	8048330.048	13005.184	1034.941	286651904.205	95521.489	279553.284	7914.45	24261.467	4855.371	7866916.955	11773514.379
Control-229_155	221198.35	688.965	65596.827	272270.456	662743.309	738.973	14276.63	148578.844	3439459.121	100428.595	10863392.057	17659.706	411235592.193	3910.449	3122671.877	45411.838	779786.205	56275.394	579926.469	37145880.298	2284754.764	23248696.95	156048.86	29787.117	5510.129	61701719.597	27051.992	4994.031	149550244.928	23128.216	939493.986	243569.782	30011367.91	299687987.642	196604485.203	136412.658	805693.828	13365070.677	8809403.918	24205.374	1189.114	334375162.44	46700.45	211431.461	5455.336	28207.616	8603.483	5944990.865	877600.395
Mild-480_201	251039.224	2344.262	327086.024	884783.13	1009484.307	1789.986	165660.655	183639.544	3985467.539	1368720.798	10464223.644	20146.079	87362698.867	6866.253	5534626.278	106287.608	1145159.783	55520.66	697867.923	57845995.266	4018617.128	20895547.632	1053161.67	157600.416	8367.938	68970273.369	20995.003	6975.431	171144711.023	6414.683	450017.926	197381.194	45796634.78	47435346.19	218275396.37	412399.671	978829.18	11440504.257	1810814.232	16544.699	957.883	392450896.367	96762.802	240704.714	6163.843	34798.76	11320.153	1185165891.747	302467425.815
Severe-471_193	244901.042	2062.635	46198.059	381026.478	701679.109	1056.445	33719.557	161823.431	3270899.887	759824.432	7771568.434	16732.012	113483129.132	2921.56	2298329.05	53824.485	873822.892	37380.818	1162125.753	51653195.016	3653472.825	25326003.77	627677.66	49103.279	6100.85	90028371.304	23321.515	6392.806	178346651.651	8179.578	510935.995	282876.429	45604045.057	132546063.024	205941607.553	365272.025	1223359.087	11087526.069	2715965.136	19416.271	3452.835	319152186.939	92768.417	237421.434	7782.887	24359.806	12727.287	62368199.416	18047892.726
Control-230_156	393851.223	2228.777	51016.358	254690.693	1265912.506	1080.304	15048.683	140785.55	1583834.164	118671.69	8362545.681	13295.849	448001337.499	4324.788	4340835.564	32979.956	3402072.391	29282.389	1222386.439	50244933.532	4387511.418	23367244.672	131593.744	17716.091	7540.699	78486121.986	20712.932	6120.918	165097870.609	25665.316	566242.812	262209.58	30838101.196	13150543.637	257127446.825	434420.18	1677588.874	15812084.88	885649.542	29021.742	837.935	343697732.062	53484.051	239916.381	7786.868	27060.649	12667.757	54692040.076	5279815.166
Moderate-305_176	163026.083	3188.009	60419.895	198730.73	1558048.799	1574.548	43092.364	144564.372	2851005.454	169203.311	12314836.122	17391.179	447281650.383	4462.708	3643883.443	100894.69	11373994.132	46030.217	2197126.455	48693674.249	4933963.816	30016416.379	219528.905	23662.296	6954.701	143202791.752	21848.502	5983.464	151679088.555	18776.949	558521.264	345013.104	24924250.55	90133508.115	163580215.584	757605.931	1155496.588	21519883.806	3274842.818	15513.85	1720.042	281854203.919	49363.804	234191.158	8484.5	25936.182	17452.66	120956544.46	20825189.067
Moderate-481_202	369195.366	2934.662	12227.075	347897.147	2435775.668	1708.787	21004.105	129812.137	2471410.451	57984.212	5817426.23	19659.842	93656353.67	2709.133	5924917.017	102011.929	755937.269	107714.474	631891.605	36432965.84	6651725.105	22749106.863	127181.693	15718.558	12692.015	69037151.517	20855.739	10783.718	95336357.095	12459.565	699335.501	346162.194	19657837.597	856555.7	254672259.091	234990.352	1508145.501	11096234.657	144721.963	22517.814	755.548	179194925.969	85291.255	282138.061	7964.645	28705.383	19583.092	16969399.018	12087099.936
Control-231_157	165823.22	1630.182	31432.442	152511.925	847347.276	1687.264	24129.861	116070.056	3207248.68	58386.385	7256748.071	12440.71	49565672.777	4832.439	1698448.867	37834.242	6933199.922	60509.934	529351.339	30028779.022	7432706.398	17863759.884	113746.465	8821.617	5153.947	52661999.896	16996.255	2754.369	112502244.125	5655.816	438808.353	218032.855	27840507.516	119759339.483	164167761.979	181135.809	911584.063	11189305.003	8600105.247	28496.139	1734.016	307582578.486	106655.101	210792.591	7103.484	30017.248	12428.238	10197534.432	3094236.135
Severe-425_182	290778.014	1906.66	37788.122	161463.434	1029710.797	2067.544	22292.455	101162.871	6827858.155	132485.078	10460641.012	20713.578	162920234.447	9239.51	3121660.814	95691.91	11429749.948	72977.341	1144999.537	41336929.779	3813953.141	26353388.159	196577.314	24487.556	5568.918	71987615.412	23726.457	5914.487	167687223.188	13180.915	525417.935	268641.269	37968164.757	101942891.293	185315197.036	437414.055	1105535.884	21892189.619	2554944.666	22938.771	5174.439	208485541.62	152250.746	262562.181	10088.526	30959.562	25041.003	10154226.565	8078552.292
Mild-475_196	63551.728	1436.962	55027.683	438167.621	644530.349	1237.963	12278.095	129701.584	2313622.373	175382.439	5225405.551	5778.169	137786009.106	1824.773	2929147.316	92154.614	714601.787	32523.831	71627.939	48134042.574	3666406.003	6756678.822	215762.452	17695.481	3921.452	4988272.966	5851.5	4290.619	171811601.305	4332.657	121296.378	28258.478	15548422.353	202782313.39	206220295.891	36634.666	300896.356	8987761.321	392033.841	20204.037	1785.438	319897244.54	108155.376	246401.562	5415.974	19374.951	8842.447	16283963.885	7529382.845
Control-233_158	301219.004	2387.704	68500.914	411436.878	883339.246	1264.185	27925.982	121019.566	2198784.7	157144.859	7630479.07	16974.661	194995337.652	4944.113	2895622.696	93520.711	6227034.906	93635.597	1052722.456	75650260.656	5073054.828	27931343.227	184890.529	42553.707	6667.404	84852650.804	21507.956	7373.371	302777882.208	15309.442	595324.829	253568.593	26493297.965	222720552.336	276336996.862	608089.484	1348878.71	15460813.029	5727462.638	27450.993	1813.7	436942905.536	94095.891	193137.334	5552.45	29410.462	9395.131	29416360.415	2697040.497
Moderate-466_189	135312.552	734.364	152693.993	624783.986	864340.83	2725.686	130375.72	154710.481	1401742.823	316138.779	15126017.112	20094.611	63757932.248	1574.25	6115916.272	70558.527	2529692.204	29720.02	378428.873	30050893.829	6881854.333	13537871.613	315405.448	45020.445	7192.446	46583677.269	27440.73	7045.057	130750710.607	5515.889	524811.892	230861.425	24715664.85	125174865.5	175591012.048	160798.551	1389383.249	16502948.605	1209289.445	18513.657	1539.193	305472754.869	88505.713	280467.915	6953.782	25577.838	6414.892	96055008.326	14554211.024
Moderate-479_200	226070.472	2598.415	82315.01	361040.571	2515508.196	1278.101	25915.999	132972.029	3290254.98	70242.596	6898701.739	17081.357	199503.653	1213.783	1384840.096	115648.31	481612.74	64990.38	839354.11	41054955.764	4430404.427	25242893.021	134184.569	13880.326	7248.335	67953931.672	20219.138	7344.796	135689064.887	1034.874	651827.2	307599.294	25293014.984	2427922.197	156460635.631	577414.517	1449684.058	11609231.974	283647.336	20727.307	1630.013	138779156.366	69537.42	315082.339	4531.459	23861.74	10366.926	7373114.563	8039725.65
Control-234_159	208132.982	2573.908	115752.476	235511.861	1358498.975	1842.842	26187.737	139252.39	1923948.096	117106.221	7950256.001	18052.304	143157792.308	3948.962	1387366.324	28118.765	4288907.705	25930.27	1694004.087	41663039.704	2387113.152	27311376.596	161062.809	24655.939	5114.188	83534847.833	21257.805	6643.083	135146457.49	8336.989	469471.722	194373.241	24553243.284	60963233.67	228658347.801	419952.841	902550.092	14627514.075	2986161.56	27588.205	1812.914	175097757.367	107942.188	227508.931	6025.796	30950.345	11012.121	NA	5112247.236
Moderate-469_191	126710.303	1889.144	162851.856	950908.994	487818.215	1586.122	26260.425	144412.899	1308770.152	1170367.255	9152368.704	21153.495	113248590.44	2861.424	556418.324	133911.052	444293.1	87029.3	714740.694	31229500.231	3196902.839	23847127.637	913398.885	179906.137	8477.054	52464224.921	21490.531	7668.893	122451479.178	7819.861	640487.063	263960.371	56957763.184	21445868.652	238478053.044	331871.292	2190647.909	11347079.172	9778217.192	17021.328	3147.768	66304288.616	75365.843	308194.431	5473.514	22232.796	5228.427	5780926.338	2470920.798
Mild-465_188	184161.293	2066.979	32436.204	310529.738	1425665.917	903.363	17411.418	128582.69	2536319.928	1355626.438	9089428.426	22932.31	165041120.771	712.368	213496.398	86467.047	8834751.129	54414.949	1208431.441	26140018.727	1851313.122	25623899.333	1057258.5	100523.436	5839.678	51182906.386	24211.808	8883.016	107300734.728	10547.276	838151.342	889033.995	74946391.473	23238165.996	59247484.905	327655.73	813434.282	11156744.843	1186261.332	15770.374	1536.56	109680814.242	50118.699	237610.665	12206.201	24778.891	13861.178	19121901.928	5883579.052
Severe-423_181	260186.713	4976.892	26973.394	502060.76	1350945.251	1610.66	15884.654	134847.711	NA	1894413.679	1575682.346	31933.351	51914767.732	1698.563	200768.111	150150.66	2052070.029	62083.644	735435.13	7621119.787	839739.32	28212611.921	1421423.578	171375.566	7854.167	53573363.095	26429.51	7992.767	41915886.41	15939.072	650168.329	528886.5	22152244.676	47737342.931	53275282.7	168122.186	849165.608	7908286.729	4492144.838	16865.854	2722.888	71183788.161	77984.624	332645.286	6781.838	25573.19	5841.332	15019039.464	2988482.899
Control-236_160	182880.495	2452.802	46588.022	331908.871	732268.404	1516.839	62873.987	134076.334	4445687.903	115658.595	8347633.635	27147.37	342003962.104	7262.557	2249302.31	60474.047	5111737.873	104567.766	797333.377	47825095.283	1447944.257	19376280.388	139514.811	25665.563	6025.89	71789054.829	24012.017	6090.28	138918794.111	21395.172	894989.254	296629.319	29760341.514	159711940.59	108815382.999	342825.698	694920.589	20049484.374	4395626.843	21158.844	824.621	113652211.489	77541.832	163470.323	7108.471	29421.279	38733.54	398571.799	3514089.747
Mild-252_167	221955.57	4300.619	40565.169	219309.688	1141447.069	1636.346	28232.619	129077.02	484681.169	99056.634	1760408.593	25512.513	31591866.715	6156.944	158400.483	121125.26	2201964.569	77737.805	3702508.195	18492638.242	1031574.8	27931623.485	183499.567	18309.698	8023.354	93225433.744	22903.906	6916.954	80301687.837	10616.685	769035.029	462335.588	15376304.612	12809881.579	32254766.674	449333.692	808910.297	9460290.685	1524210.841	14002.489	2051.556	75442538.955	83087.8	254005.346	5631.801	33622.273	8802.686	8569654.488	2734369.937
Moderate-477_198	276506.474	1322.152	69779.331	500114.644	1461726.431	1123.828	25028.243	136098.605	3427179.683	213412.743	6052668.073	22321.031	96303701.45	1514.792	884653.796	123571.007	4729070.755	61647.555	743071.043	52552488.272	2324323.371	26492034.966	259070.646	40277.11	6025.987	86164049.361	20960.186	6823.389	168803185.734	9910.734	446264.351	200139.84	33738832.329	47482031.729	120409337.282	650444.843	1494217.079	8318239.102	4734262.511	23136.593	2309.471	38405774.844	126162.717	270631.623	4623.458	24689.237	4328.7	4483401.27	1283784.996
Control-237_161	275842.428	2111.71	74450.408	371418.763	1507784.403	1057.235	29298.202	144920.843	2970217.467	227187.126	8001592.758	19467.724	191971564.372	2520.129	1935208.711	131740.166	3233650.245	71768.607	842510.457	48953983.446	4055786.125	21418887.563	212795.418	21400.18	5470.107	66295464.052	22361.454	10040.77	169591287.515	13560.695	736673.134	703165.793	58793284.989	305887979.785	231280996.187	314151.967	855961.015	17592690.815	12773966.369	20038.242	977.9	139754830.551	86571.467	240431.364	4256.462	25686.578	14817.81	1150831.992	1371485.236
Moderate-305_177	246906.928	1743.904	96166.78	384137.81	1651042.546	1621.392	30083.855	153006.243	3607265.28	195756.135	13479675.32	22132.903	417367333.484	3097.15	4271583.225	67193.594	6561562.793	21762.092	1257367.838	62427087.779	7540607.053	27221982.217	211787.329	19600.766	6406.784	133177658.32	29745.52	5288.32	205680693.352	18043.332	656587.534	322493.292	76143884.708	168188155.404	209772740.425	414883.067	1502317.627	20120702.288	51246641.457	19108.425	1434.44	252319927.814	72298.16	301611.424	8683.03	34351.351	11156.869	127450064.469	41759467.065
Control-238_162	160430.486	996.976	88036.93	480408.87	512848.71	1618.608	35366.413	147839.521	4314846.123	152907.518	10943446.669	18732.799	150672772.954	3500.382	3710129.078	117045.509	4052813.016	62469.748	629602.226	38719149.018	1956035.181	20561508.066	169975.72	22526.433	5491.809	62528301.686	31350.905	5892.39	127920729.732	7357.19	545722.612	262650.206	29496986.826	733025787.246	170039835.845	224635.249	1261235.989	13052713.598	6299130.897	22132.94	1027.379	262363133.581	95938.347	215534.181	7611.301	30843.092	30776.488	88051351.571	8655610.617
Moderate-461_186	202093.56	1971.371	54940.362	495778.117	939130.448	1897.928	153380.531	153854.11	1917484.974	236376.106	15987218.948	19546.933	302570876.061	1226.053	6795577.782	62281.843	452625.614	22606.858	823201.66	46635191.591	3400131.26	21110253.927	234265.128	31660.489	7244.455	95532960.602	49074.107	7314.356	169897450.108	16408.681	728511.107	382250.924	86059861.608	134131443.367	306245364.587	523598.071	2167262.235	22694309.929	73700784.87	15635.722	3053.769	221354448.299	66764.453	266796.788	4914.724	25142.379	6081.625	61217447.394	18454770.046
Control-239_163	269546.187	1357.34	47934.952	378559.586	730489.146	1559.85	30282.286	147098.55	2302262.658	447466.315	10311341.209	25665.138	207305262.548	1871.825	1756166.974	131415.336	2202322.203	49107.327	1023617.133	44983878.658	3519056.756	25303814.06	423279.285	39996.725	4759.924	55887364.69	22661.491	9100.687	141009477.477	11531.548	593605.861	234754.218	32579315.38	859814043.61	169639773.899	143633.666	976066.176	12764256.488	9030008.872	16339.434	2629.006	220892936.414	55638.529	304470.121	6888.855	30573.795	19610.281	45702283.915	7233701.63
Mild-442_184	344107.452	4525.096	59385.889	500615.287	2641568.566	3770.576	276231.302	144544.653	4011296.415	264009.803	16907414.247	31741.483	102288182.308	2600.42	8761861.439	148841.552	1019541.975	57472.234	673760.335	41501637.714	5186802.713	29867529.55	281730.38	47864.401	7853.896	64159220.564	29238.125	5587.928	130914135.751	6003.238	1096668.22	444124.765	44342431.71	442672535.981	198196576.702	564206.342	1331653.307	20167880.142	13640881.084	20756.296	2301.704	256465431.243	100750.593	281298.023	7476.778	30681.643	9934.618	159230969.552	37677804.527
Moderate-472_194	225094.16	7903.567	57788.522	303949.53	NA	1615.684	37167.791	133161.743	1667370.895	604151	9258769.087	16588.943	398206672.438	2984.567	9432252.482	68877.668	4868946.975	35913.949	1277012.255	38397841.301	6582674.7	21629848.269	494362.259	75203.756	8206.476	69386353.667	22913.197	8283.316	153168973.149	24435.954	1179765.808	690845.901	50962662.391	935300424.597	193558286.55	375261.302	1014024.817	12761086.571	13298352.769	23882.01	1940.501	322555116.975	60749.91	282191.076	6966.701	27421.432	15410.057	194648244.743	24080158.539
Control-240_164	192554.146	2638.362	59167.25	336947.347	861585.925	5539.41	27805.587	139234.677	4567800.377	265361.201	16072149.012	21197.489	39026601.044	1215.19	3940036.054	133405.625	7309193.231	71688.441	824193.684	40832919.548	2644283.557	31580450.498	286765.182	32946.312	4903.081	68795170.19	26282.521	7851.893	118020058.481	3736.946	532643.147	277710.319	37764836.351	494990141.426	195241163.893	162267.953	710296.005	18259917.112	11686080.612	17739.811	2288.119	315706687.565	87561.424	320251.64	6405.128	30849.633	16285.722	68328878.248	15499083.964
Moderate-443_185	257383.617	1317.024	34913.421	619679.342	1307053.383	1464.132	40990.074	140469.163	19061070.346	1490261.432	7998016.84	16892.743	99644202.079	892.946	5135660.79	67685.352	3545518.009	25842.145	2755533.258	45333303.991	4139746.969	28096384.786	1131097.623	194250.884	7682.06	66910367.289	26443.303	9989.265	168602458.919	5934.517	674526.063	348941.844	57937478.656	245049180.21	271726997.601	428138.72	2774653.792	17158412.153	17994205.571	17870.588	2999.869	411405498.311	59805.493	218327.428	8116.885	30219.941	18274.194	108561832.081	40246939.901
Moderate-478_199	248119.562	2144.547	179460.924	679313.128	1534145.953	3320.789	447921.334	142802.623	1046635.428	1153352.997	8649272.45	25821.566	5092588.19	1580.899	6182916.109	109250.891	510037.063	61979.956	641010.625	32691522.301	5025420.12	24653262.478	881938.659	226208.707	7931.367	39378984.455	23944.801	4939.307	140540370.187	1341.387	406067.475	239051.631	35400118.794	1688360103.902	174259255.842	301795.258	939155.971	10390832.835	9045030.983	20341.467	2221.627	395202994.047	71045.885	328446.914	6924.253	23033.989	9138.638	36953667.617	18039719.327
Control-244_165	271795.743	3444.662	138211.456	363488.724	365529.687	1002.447	31850.329	143384.132	NA	104328.381	840379.165	24748.878	40731935.802	7182.062	71794.242	123918.647	347152.71	57477.096	837646.576	8990217.565	262701.094	28046622.567	156781.833	18451.133	6527.866	70636807.132	24474.838	5910.913	47420100.568	22498.388	424333.937	276226.881	17233457.006	85699062.238	49200132.988	236984.541	1013537.669	7639482.486	4034215.132	18960.837	1419.908	76242243.778	111990.097	448763.56	3819.155	31957.592	16283.721	6209074.225	1975424.856
Moderate-470_192	204338.039	6048.612	66034.585	273868.195	3803968.378	2954.495	46121.42	121913.098	3846548.056	145669.901	14313075.921	18937.762	1059032344.45	1929.49	5950142.345	93726.286	1532536.583	51770.864	1533017.885	27628788.826	8170247.364	27923873.225	198984.524	16280.956	9756.694	102634365.114	21911.22	8290.12	108276099.593	46202.889	1092542.163	1090261.434	44682469.873	813125143.428	205524700.512	531026.984	939913.671	25136671.494	14695630.33	20153.693	2099.065	396908134.969	96045.075	290462.054	6178.152	24180.32	15931.846	127577318.164	42214377.466
Control-245_166	203866.713	8051.13	180511.844	185533.136	NA	2567.517	77330.113	150001.669	1957349.844	118065.609	19020042.96	29425.403	158471931.234	4402.175	1096321.34	190965.831	10074626.309	88933.616	523103.841	30080080.759	2997927.196	20219890.851	192095.35	21879.774	5205.644	53649401.76	21469.205	11562.443	91640657.895	9768.405	1493299.402	511482.204	57785449.499	1459139812.789	200125720.955	215471.767	768699.479	25399064.933	15874057.025	16230.546	2012.921	232932558.948	54807.786	303971.565	5267.31	33565.813	22391.338	54278075.949	12609597.598
Severe-272_172	319773.815	1877.373	39088.162	269295.119	764018.55	1934.563	32005.494	143633.761	400699738.776	151582.575	9019704.502	20783.649	80699672.652	2067.831	2541568.684	143116.919	611523.818	81702.478	1274689.116	48219112.095	3101936.984	25868322.068	249436.086	33830.951	6983.027	93193044.595	22950.878	10139.155	112326742.686	7734.221	501656.552	336015.937	32776283.116	566099186.017	137185999.292	515392.652	1680817.542	15030080.431	9521198.866	17097.794	2050.949	315631365.297	82079.943	356716.646	4380.49	33694.557	15639.449	28802698.806	11035565.727
Mild-278_174	221791.753	3827.858	343566.187	1125207.873	919288.077	2539.644	242850.022	174547.036	3627014.246	341573.525	18849153.565	25337.348	374672326.893	7580.871	2250543.865	70864.158	9268964.931	23234.819	3006471.82	61598552.279	4693220.027	21092770.309	298185.981	36139.859	10760.124	97763843.254	44578.294	5436.865	220721971.247	24177.201	969257.001	416109.767	43936138.457	693329117.794	150745187.485	245828.822	1063937.948	15776061.868	13007287.461	16316.717	1153.959	339053415.825	52348.445	232028.338	5459.909	34876.506	20567.693	86843495.552	20398339.589
Moderate-483_204	334767.663	1371.493	77570.647	843003.584	1018713.998	1244.789	254954.042	170265.955	1466906.342	149506.242	8548913.988	26415.258	77423354.387	2204.267	2893428.873	62532.411	605062.854	32699.6	596190.504	67861969.891	4411083.115	20632920.934	227886.357	21238.134	6446.879	87069926.524	37725.437	9226.951	206154072.925	6069.348	466917.899	226576.811	50412587.934	1435648107.096	410536722.446	202488.723	996112.358	9875401.965	19908987.36	21736.688	784.326	388171855.449	89368.262	305150.423	23192.487	28559.054	325026.857	70511190.457	27396900.836
Moderate-419_180	219439.346	1692.17	33079.061	509318.744	1340797.963	1089.31	34575.554	143169.161	3853619.055	724721.983	9580021.193	20682.807	155932499.141	1268.078	2251587.754	106172.595	5352154.426	68164.77	576266.695	42338982.309	2913472.358	23320358.397	618251.594	81942.889	5430.213	70750757.659	20717.607	7683.411	125491261.081	11983.442	1157426.554	350862.756	71456385.247	1279508135.812	147994295.008	416021.053	1238064.615	12023013.841	19348368.359	18314.679	2362.232	315401444.407	102722.364	332282.764	7290.693	27706.304	17567.981	55290207.871	7510472.382
Mild-482_203	128919.924	6324.303	199118.63	719054.868	873911.342	1399.905	70712.818	147336.552	2392131.94	859513.962	6014420.357	27952.792	944654.11	976.344	7087878.309	30930.847	451797.184	29436.355	595298.558	39279783.005	11707626.773	22184115.484	677222.823	105145.733	7724.26	46093996.771	22560.35	5902.045	144752141.824	2960.766	914997.557	239297.397	46206881.742	876818031.282	247445101.507	495041.389	851400.497	9038131.697	12763660.17	24820.595	1183.071	265383156.057	88648.94	234980.246	5747.992	29806.299	15446.346	25645972.164	17435617.045
Moderate-473_195	209403.403	2107.461	79100.654	572237.898	1169392.767	1773.631	50330.856	163995.041	2292669.379	430964.493	14365790.135	19399.447	239218098.87	1958.835	3690513.365	109084.182	853597.409	54358.586	763794.522	38749135.803	3178836.264	19562032.466	397985.144	28557.112	6924.2	85330117.515	25114.358	7965.67	121478898.639	17600.805	522175.766	248665.9	39542829.582	1487775631.912	291987423.299	334923.996	1276808.078	13436032.995	10280512	19782.582	3291.891	231464182.837	69086.448	257513.85	4991.983	25547.929	11478.492	21467058.52	12448164.441
Mild-485_206	260476.832	1314.488	34348.301	407855.823	874350.653	1406.733	47708.646	128864.283	2105051.718	162094.004	9403274.481	19500.298	162767760.182	1506.794	4257840.8	74980.487	3219497.397	112434.504	487122.617	45043504.213	3985988.07	22163079.212	180435.651	29860.349	5765.533	96156289.94	24044.526	4456.256	189225886.483	14044.287	732943.779	194882.545	61035125.452	925969146.434	229212186.328	304736.075	1527539.296	15695283.577	24715566.918	25644.649	1933.492	339660665.214	142271.236	249740.376	6738.954	26707.865	13667.632	20939068.272	1712833.817
Mild-488_209	204549.844	1982.536	90329.422	479274.639	794521.209	1391.949	494255.233	140444.279	4571915.335	105452.501	8459999.743	29267.692	2363076.524	2904.796	2985010.114	32025.405	673384.456	16442.166	521309.057	24466950.144	2563265.88	25127589.164	163294.827	13965.34	7830.403	90031884.025	20814.724	4083.675	102726302.888	1960.818	424821.49	188790.442	58786913.235	1202797814.415	194087756.334	340576.79	2327795.687	10249060.934	14565154.194	29309.092	1658.2	280127576.091	110656.845	261203.63	7000.516	26195.763	18352.737	117100136.308	26959283.456
Moderate-489_210	142665.091	734.6	33658.023	436674.22	852416.848	1548.314	36435.154	145514.006	1656851.948	732310.335	6660495.38	16870.764	20946224.021	2463.054	4780985.155	92679.52	569327.133	49220.093	746039.248	26392173.149	4174393.753	22975674.175	600160.867	69526.865	6701.841	46735267.829	20643.677	6101.819	109801994.67	3915.41	660232.2	164703.386	37113952.5	688996384.704	224527674.659	382508.373	2388487.8	12985003.554	8806507.699	27423.168	2207.572	357145291.555	95944.129	248132.988	6187.94	28838.923	14844.025	75973427.175	12083106.024
Mild-490_211	162071.343	670.909	21166.783	155004.003	47184.988	450.803	106160.315	99206.644	1182422.823	183393.56	3391402.741	19294.287	50785510.203	548.466	465259.543	8138.734	9733373.107	9333.413	325975.437	15981971.521	1688941.953	12158768.191	228605.615	25050.618	3766.26	31565117.148	13544.995	1867.384	78522078.497	4034.514	211092.028	84652.447	35718371.445	991320377.819	140861512.014	41619.063	496950.07	9577328.039	11003369.649	27863.112	648.824	142682666.242	114063.789	324580.684	11858.253	31157.519	32175.259	22103188.532	8872440.569
Severe-491_212	208128.076	571.538	47016.856	470976.961	604701.012	1038.347	296313.691	164044.241	1084989.905	134461.99	5960875.027	30616.872	32743736.857	1743.178	1240196.519	26261.499	714390.716	24084.801	319914.369	40779403.749	3267237.265	21166967.337	185465.863	24768.41	5345.422	71679172.024	20172.646	4361.145	120442742.689	3948.843	364840.736	149581.762	30540191.388	1099156104.102	167099940.616	281782.413	1495921.535	9528429.477	7676812.51	29290.144	1191.757	260407246.211	135086.29	304007.555	6333.954	25863.069	11926.893	18077746.995	6017650.919
Mild-492_213	210990.28	6431.921	86605.228	1226627.847	3247452.391	4838.776	711340.866	198887.715	949985.497	205779.426	15261796.6	32166.405	229218737.367	5320.332	10079998.516	35583.219	659364.778	12658.942	701521.966	27308719.947	15403596.432	20745195.053	215485.934	38289.305	10554.268	61789320.786	33540.491	5153.152	94890089.912	18114.842	1022698.472	510951.346	51091614.58	1195165055.828	122083670.86	134188.574	1103107.894	24943813.745	17247517.43	29582.201	1345.296	220424052.592	101242.669	283912.961	7032.373	29999.748	14384.701	32864622.887	13119401.739
Mild-493_214	187946.146	2363.001	76349.462	229009.535	1777880.557	1657.264	93108.645	147320.394	1914037.396	509960.254	7087637.852	23528.321	164838426.58	20787.911	4180707.885	86685.161	4279864.907	79601.863	422867.002	32412085.635	3105272.771	22512417.414	445267.386	80839.641	6675.647	74223907.085	19258.336	8402.65	119449516.966	9484.033	731673.662	222228.352	35725159.547	709204228.376	188267651.586	320432.23	672872.435	11475165.296	11554533.076	28545.28	1485.054	283453795.583	100995.95	298099.692	9080.853	36952.71	29503.642	97822194.577	21935069.538
Severe-494_215	470705.444	13.896	18.661	493.852	1492823.289	0.976	101557.032	5934.621	1980185.247	116.967	6696787.54	14880.033	122081026.543	122024.774	6472932.402	30518.794	1692652.854	36359.308	695118.947	44142920.532	5409266.71	28725184.003	316.01	47.972	5961.632	104790801.27	18069.008	5383.438	161144436.065	10724.777	1118119.224	289377.958	29224167.188	543931869.353	262662974.091	389948.861	4337233.251	10682542.887	7830576.924	362.813	87.666	313006890.378	241.901	251220.699	2293.916	6071.519	1311.087	4737291.181	13217971.247
Severe-494_216	421824.069	2414.789	79353.747	330561.912	1320166.658	1746.111	274725.72	154314.727	1570869.593	257926.085	9352237.829	20254.538	68298084.664	6989.104	7032727.001	15319.183	1046736.051	20761.676	754604.381	57302461.998	4757673.224	26982432.905	228360.047	36034.828	5970.988	106673989.258	28350.058	3762.385	187912945.474	5244.975	582387.008	276666.377	50844655.696	797916210.161	276569843.404	397871.602	2358658.154	10745531.261	22528774.469	28987.824	1445.067	355234343.167	138505.629	340663.341	27159.244	32670.64	159133.583	22254249.742	6924951.62
Mild-495_217	244196.175	2197.454	119844.077	806790.557	600027.476	4988.944	208395.464	195498.323	1726704.821	670469.72	11693797.437	18926.885	21083280.059	6186.868	1806423.119	107155.072	1062529.615	64600.289	521650.249	47577612.568	2986051.692	29671947.093	575046.994	70313.075	5363.017	88723506.695	23039.702	7659.731	190670308.624	5739.363	443931.788	192521.99	37481721.076	869328762.539	210679971.53	761355.245	977168.233	12821591.081	9895126.121	24665.527	2740.624	313872469.886	85647.949	276199.421	8861.053	27826.579	14642.978	13987003.951	10016116.882
Mild-496_218	293024.911	1067.559	56000.836	368937.1	1023407.897	2811.395	164137.951	181961.057	1338538.873	589286.217	8100002.7	29681.638	111251757.504	3163.657	2766523.175	24329.373	832477.538	20296.556	971227.031	34614421.252	6902659.653	30961171.785	586834.478	65423.846	7745.165	57239760.808	23650.554	4972.517	125968845.77	9794.701	681232.147	257306.545	41470274.652	1305130343.118	156589110.11	335129.537	1999360.275	12833722.733	10277198.522	24701.047	1951.699	245940578.809	116834.665	318375.76	8702.924	29917.944	13870.445	37504917.331	12153620.613
Mild-497_219	290608.413	1514.185	48004.946	677384.834	1208128.282	2901.528	191346.795	187512.541	1586130.713	118833.034	13325731.499	29694.499	149323687.035	4001.178	4127114.209	82644.57	1111323.407	100298.64	1199898.716	36523426.941	4051332.375	27407498.655	175102.657	18218.654	7556.878	120503824.482	24291.235	6727.277	138539826.041	11881.993	721677.208	253607.992	40767125.886	874398687.593	239588564.491	460574.08	1178034.39	17585992.592	12325053.843	27218.232	2959.621	251184120.492	116554.081	261977.578	10829.288	29182.401	19930.431	56421371.362	22576461.747
Moderate-498_220	297192.204	7526.513	139999.955	1358978.922	2761771.452	2409.772	57579.407	227816.267	1624949.733	2051945.746	10256210.436	24487.042	165613739.865	4155.109	12225175.267	46486.038	2006648.992	26598.397	438903.856	59643283.791	9480147.412	18715756.722	1518020.104	401786.107	6391.203	51030084.828	25754.928	5380.187	227693802.566	9835.432	693212.922	338427.074	33199822.291	1396273268.394	212001606.411	149899.546	1608861.829	9769086.784	7982111.488	27806.289	2307.213	328280348.05	142620.848	306136.672	9863.228	31595.675	14184.883	34962498.163	10845814.063
Severe-499_221	297655.168	3683.729	332796.27	1134877.227	2457157.221	2916.907	121461.299	227368.008	1956992.013	1199345.685	12514615.408	23503.544	82792291.181	4346.908	10752207.937	8430.926	1379048.044	6382.5	533890.533	40249410.874	7133441.904	17503810.478	906520.524	195669.41	6952.245	44526109.208	30298.346	2368.251	176339822.708	6155.24	991923.759	419913.375	35555366.609	814390990.062	252246916.153	130356.534	1143702.449	18057373.906	6716377.062	25707.751	1635.424	389805585.34	72288.147	274739.909	9958.195	29060.201	15504.337	85351780.518	53188460.793
Mild-500_222	171342.345	2110.53	23054.635	242063.838	685004.772	1459.319	183402.639	145822.714	1742600.281	248729.548	8522648.745	21089.326	81558674.26	3587.085	7775423.324	57118.605	606428.216	63157.486	272976.533	20409442.781	5401661.963	17918628.567	277577.305	82694.951	7790.511	50623287.759	15428.738	8492.587	88560861.596	7564.196	NA	225375.205	52053356.259	1026842521.045	218244612.187	495297.724	2666242.992	11976858.679	15217708.934	28175.783	2230.035	229518035.707	92634.061	313343.785	13011.739	27855.744	15753.801	30876294.238	12396847.792
St_SF_pre	NA	552595.054	595223.367	534817.077	NA	838.387	NA	140623.803	NA	493289.685	NA	NA	NA	1281.219	NA	NA	NA	NA	NA	NA	NA	NA	596859.665	213.813	NA	NA	NA	NA	NA	NA	NA	NA	NA	NA	NA	NA	NA	NA	NA	304565.921	459097.419	NA	545179.604	NA	19032.84	495947.343	218665.51	NA	NA
St_PA_pre	NA	NA	NA	NA	NA	NA	NA	NA	NA	NA	NA	NA	NA	NA	NA	NA	NA	NA	NA	NA	NA	NA	NA	NA	NA	NA	NA	NA	NA	NA	NA	NA	NA	NA	NA	NA	NA	NA	NA	NA	NA	NA	NA	5566.3	NA	NA	NA	NA	NA
St_BA1_pre	NA	NA	NA	NA	NA	NA	NA	NA	NA	NA	NA	NA	NA	NA	NA	NA	NA	NA	NA	NA	NA	NA	NA	NA	NA	NA	NA	NA	NA	NA	NA	NA	NA	NA	NA	NA	NA	NA	NA	NA	NA	NA	NA	NA	NA	NA	NA	NA	NA
St_AA_pre	15669.482	NA	NA	NA	25500.774	NA	55374.139	NA	NA	NA	49458572.944	12575.936	NA	NA	2784.648	2978.647	NA	66.224	2791032.126	142988.949	2536073.344	631127.935	NA	NA	3822.757	199350.777	87.281	146.176	40340878.14	2368.223	1682.33	3485.68	58525448.612	5684824.93	150019589.986	218.349	908961.173	24156068.475	9937092.303	NA	NA	35097307.985	NA	NA	NA	NA	NA	NA	NA
St_BA2_pre	NA	NA	NA	NA	NA	NA	NA	NA	NA	NA	NA	NA	NA	NA	NA	NA	NA	NA	NA	NA	NA	NA	NA	NA	NA	NA	NA	NA	NA	NA	NA	NA	NA	NA	NA	NA	NA	NA	NA	NA	NA	NA	NA	NA	NA	NA	NA	NA	NA
St_PA_post	NA	NA	NA	NA	NA	NA	NA	NA	NA	NA	NA	NA	NA	NA	NA	NA	NA	NA	NA	NA	NA	NA	NA	NA	NA	NA	NA	NA	NA	NA	NA	NA	NA	NA	NA	NA	NA	NA	NA	NA	NA	NA	NA	377.276	NA	NA	NA	NA	NA
St_AA_post	57974.771	NA	NA	NA	NA	NA	793469.603	NA	NA	NA	62658248.953	11490.686	NA	NA	NA	16922.311	NA	54.225	999769.231	11136888.258	2756917.49	651535.837	NA	NA	1539.787	1918888.08	154.827	25.618	73868105.639	944.339	5103.108	4156.164	16742607.489	4933849.52	210268041.895	491.345	873121.311	8128640.004	3163086.037	NA	NA	43534506.627	NA	NA	NA	NA	NA	15017.03	7568.339
St_BA2_post	NA	NA	NA	NA	NA	NA	NA	NA	NA	NA	NA	NA	NA	NA	NA	NA	NA	NA	NA	NA	NA	NA	NA	NA	NA	NA	NA	NA	NA	NA	NA	NA	NA	NA	NA	NA	NA	NA	NA	NA	NA	NA	NA	NA	NA	NA	NA	NA	NA
St_BA1_post	NA	NA	NA	NA	NA	NA	NA	NA	NA	NA	NA	NA	NA	NA	NA	NA	NA	NA	NA	NA	NA	NA	NA	NA	NA	NA	NA	NA	NA	NA	NA	NA	NA	NA	NA	NA	NA	NA	NA	NA	NA	NA	NA	NA	NA	NA	NA	NA	NA
St_SF_post	NA	1163389.674	1168230.915	897577.77	NA	2292.349	NA	136981.639	NA	523972.024	NA	NA	NA	10529.839	NA	NA	NA	NA	NA	NA	NA	NA	679601.736	203.21	NA	NA	NA	NA	NA	NA	NA	NA	NA	NA	NA	NA	NA	NA	NA	525842.409	380087.974	NA	870643.437	NA	63864.929	940405.63	167658.799	NA	NA
[truncated: 189 more columns]

## Sheet: AreaCorrLog2Cen
Supplementary Table 1. Targeted metabolomics.
Sid	2-aminoadipic acid@14.99-gc	2-hydroxy-2-methylbutyric acid@3.52-sf	2-hydroxy-3-methylbutyric acid@4.68-sf	2-hydroxybutyric acid@2.49-sf	2-hydroxyethanesulfonic acid@1.02-qpneg	2-hydroxyglutaric acid@8.23-sf	2-oxoglutaric acid@13.01-gc	2-oxovaleric acid@14.29-sf	3-hydroxybenzoic acid@7.71-qpneg	3-hydroxybutyric acid@1.65-sf	3-hydroxyglutaric acid@1.36-qpneg	3-hydroxyisovaleric acid@7.80-gc	3-indoxyl sulfuric acid@4.66-qpneg	3-methyl-2-oxovaleric acid@14.26-sf	3-methylglutarylcarnitine*@2.64-qppos	3-methylhistidine@16.68-gc	3-phenylpropionic acid@10.28-qpneg	4-hydroxymandelic acid@15.21-gc	4-hydroxyproline@12.43-gc	5-aminovaleric acid@1.09-qpneg	5-Hydroxy-DL-tryptophan@1.50-qppos	5-oxoproline@12.35-gc	Acetic acid@1.65-sf	Acetoacetic acid@12.83-sf	Adenine@16.19-gc	Alanine@6.89-gc	Allantoin@16.81-gc	Alpha-tocopherol@29.39-gc	Aminocaproic acid@1.27-qpneg	Anthranilic acid@13.42-gc	Arabinose@14.16-gc	Arabitol@14.80-gc	Arachidic acid@23.63-qpneg	Arachidonic acid@20.10-qpneg	Arginine@0.98-qppos	Asparagine@14.12-gc	Aspartic acid@12.36-gc	Azelaic acid@9.66-qpneg	Behenic acid@24.91-qpneg	Benzoic acid@9.49-sf	Beta-hydroxypyruvic acid@13.75-sf	Betaine;Valine@1.04-qppos	Butanoic acid@5.35-sf	Cadaverine@4.73-pa	Capric acid@14.38-sf	Caproic acid@11.79-sf	Caprylic acid@14.10-sf	Carnitine C10:0@12.17-qppos	Carnitine C10:1@11.39-qppos
BlM_pre	-7.942	-3.854	-10.266	-10.733	-3.273	-7.197	-1.973	-3.431	-2.609	-9.65	-2.973	-1.886	NA	-7.374	NA	-5.923	NA	-8.191	-8.567	-6.58	-9.354	-6.224	-3.259	-12.397	-1.323	-10.48	-9.61	-6.473	-7.784	-2.756	-6.681	-6.543	-1.41	-8.912	-4.503	-8.301	-6.118	0.034	-2.196	-0.153	-0.163	-3.335	-3.868	0.837	-2.227	-0.842	-1.357	NA	-11.637
BlM_post	-8.277	-4.778	-8.795	-10.239	-3.457	-4.846	-0.023	-3.904	-1.861	NA	-3.122	-1.33	-16.108	-2.923	NA	-5.168	NA	-8.291	-4.824	-5.943	-9.387	-6.714	-2.932	-8.446	-2.477	-8.182	-7.688	-5.602	-6.08	-4.14	-5.102	-6.231	-1.505	-6.682	-4.335	-5.529	-6.486	0.198	-2.147	0.793	-0.123	-3.457	-3.633	1.272	-1.527	0.367	-2.042	-10.936	-9.738
QC_5a	0.278	0.186	0.194	0.292	NA	0.14	1.748	0.161	4.065	0.949	-0.133	0.376	0.498	-0.381	0.438	-0.066	0.747	-0.164	0.552	0.173	0.636	0.147	0.552	0.293	0.343	0.253	0.258	0.135	0.287	0.361	0.327	0.24	-0.193	0.016	0.01	0.885	0.582	-0.014	-0.346	0.712	1.303	0.014	0.003	0.791	0.109	-0.028	0.208	0.213	0.66
QC_5b	-0.169	0.287	0.206	0.33	0.958	0.04	1.57	0.124	3.872	0.923	-0.224	0.225	0.341	0.013	0.352	0.002	0.593	-0.312	0.585	-0.051	0.352	-0.001	0.535	0.369	-0.007	0.323	0.196	0.137	0.011	0.364	0.264	0.243	-0.688	-0.139	-0.055	0.795	0.511	0.085	-0.559	0.737	1.324	-0.122	0.041	0.776	-0.259	0.059	0.123	0.015	0.279
QC_6e	NA	NA	NA	NA	NA	NA	NA	NA	NA	NA	NA	NA	NA	NA	NA	NA	NA	NA	NA	NA	NA	NA	NA	NA	NA	NA	NA	NA	NA	NA	NA	NA	NA	NA	NA	NA	NA	NA	NA	NA	NA	NA	NA	NA	NA	NA	NA	NA	NA
QC_4a	0.444	-0.125	-0.078	0.004	0.994	-0.246	2.852	-0.823	4.303	0.665	0.134	0.945	0.578	-1.214	0.565	0.109	0.85	-0.063	1.09	0.207	0.533	0.34	0.262	-0.123	0.524	0.035	0.357	0.353	0.187	0.706	0.723	0.426	0.371	0.814	-0.051	0.596	0.494	0.211	0.688	0.182	1.404	0.03	-0.193	0.818	-0.886	-0.289	-0.215	0.648	0.688
QC_5c	-0.025	0.551	0.298	0.349	1.103	0.28	1.508	0.031	4.193	0.894	0.186	0.447	0.656	0.019	0.425	-0.038	0.835	-0.41	0.491	0.164	0.634	0.065	0.54	0.341	0.271	0.429	0.178	0.078	0.2	0.255	0.247	0.188	-0.458	0.293	0.046	0.514	0.465	0.035	-0.28	0.781	1.688	0.029	0.066	0.781	-0.263	0.166	-0.003	0.288	0.437
QC_6f	NA	NA	NA	NA	NA	NA	NA	NA	NA	NA	NA	NA	NA	NA	NA	NA	NA	NA	NA	NA	NA	NA	NA	NA	NA	NA	NA	NA	NA	NA	NA	NA	NA	NA	NA	NA	NA	NA	NA	NA	NA	NA	NA	NA	NA	NA	NA	NA	NA
QC_4b	0.487	-0.092	0.112	0.182	1.177	0.032	2.593	-0.374	4.096	0.821	0.055	0.816	0.484	1.511	0.405	0.576	0.877	0.062	0.589	-0.019	0.414	0.412	0.446	0.045	0.22	0.304	0.338	0.326	0.099	0.58	0.482	0.381	0.409	0.819	-0.071	0.538	0.445	0.181	0.645	0.35	1.323	0.056	-0.143	0.869	0.033	-0.111	0.219	0.626	0.673
QC_6a	0.344	0.626	0.722	0.641	NA	0.653	1.647	0.1	NA	0.994	NA	0.491	NA	1.954	NA	-0.426	NA	-0.963	0.047	NA	NA	0.046	0.66	0.741	0.115	-0.172	0.111	0.052	NA	0.08	0.137	0.141	NA	NA	NA	0.177	0.256	NA	NA	0.727	1.863	NA	0.29	NA	0.395	0.433	0.81	NA	NA
QC_5d	0.037	0.209	0.285	0.324	1.063	0.008	1.505	-0.288	4.044	0.803	-0.111	0.348	0.521	0.321	0.304	-0.129	0.618	-0.408	0.574	-0.001	0.52	0.062	0.426	0.178	0.035	0.45	0.151	-0.043	0.045	0.309	0.174	0.154	-0.557	0.175	-0.096	0.47	0.45	0.07	-0.459	0.78	1.939	-0.068	0.075	0.811	-1.615	0.145	-0.451	0.227	0.316
QC_6b	0.048	0.376	0.701	0.646	NA	0.643	2.024	-0.03	NA	0.994	NA	0.551	NA	3.281	NA	-0.206	NA	-0.496	0.32	NA	NA	-0.002	0.621	0.696	-0.011	-0.076	0.005	0.001	NA	0.137	0.166	0.161	NA	NA	NA	0.456	0.408	NA	NA	0.755	1.97	NA	0.307	NA	0.588	0.405	0.688	NA	NA
QC_5e	-0.062	0.441	0.235	0.313	1.117	0.356	1.661	-1.941	4.222	0.672	0.151	0.42	0.733	-1.814	0.471	-0.094	0.908	-0.374	0.598	0.089	0.674	0.05	0.293	0.044	-0.092	0.42	0.122	-0.029	0.167	0.18	0.087	0.179	-0.162	0.516	-0.031	0.395	0.489	-0.059	-0.113	0.834	2.335	0.053	0.011	0.847	-3.168	0.111	-0.801	0.207	-0.109
QC_5ee	NA	0.537	0.289	0.385	NA	0.166	NA	-2.602	NA	0.593	NA	NA	NA	-1.62	NA	NA	NA	NA	NA	NA	NA	NA	0.281	-0.016	NA	NA	NA	NA	NA	NA	NA	NA	NA	NA	NA	NA	NA	NA	NA	0.754	2.453	NA	0.139	0.798	-3.75	-0.008	-1.052	NA	NA
QC_4c	0.486	NA	NA	NA	1.141	NA	2.429	NA	4.315	NA	0.082	0.969	0.687	NA	0.578	0.262	1	-0.235	0.553	0.256	0.632	0.536	NA	NA	1.045	0.536	0.434	0.271	0.257	0.639	0.506	0.377	0.063	0.79	0.026	0.403	0.521	0.392	0.246	NA	NA	0.223	NA	0.905	NA	NA	NA	0.807	0.904
QC_6c	0.239	0.665	0.662	0.646	NA	0.813	2.273	-0.371	NA	0.96	NA	0.612	NA	2.098	NA	-0.207	NA	-0.538	0.34	NA	NA	0.061	0.62	0.707	0.069	-0.047	0.111	0.096	NA	0.449	0.161	0.192	NA	NA	NA	0.51	0.405	NA	NA	1.086	1.981	NA	0.331	NA	-0.25	0.466	0.603	NA	NA
QC_6ax	NA	0.918	0.805	0.854	NA	1.07	NA	0.124	NA	1.088	NA	NA	NA	-2.008	NA	NA	NA	NA	NA	NA	NA	NA	0.78	0.925	NA	NA	NA	NA	NA	NA	NA	NA	NA	NA	NA	NA	NA	NA	NA	0.687	1.643	NA	0.444	NA	0.042	0.43	0.556	NA	NA
QC_5f	NA	NA	NA	NA	1.089	NA	NA	NA	4.087	NA	0.108	NA	0.405	NA	0.379	NA	0.752	NA	NA	0.039	0.198	NA	NA	NA	NA	NA	NA	NA	0.098	NA	NA	NA	-0.595	0.355	-0.022	NA	NA	-0.219	-0.389	NA	NA	-0.024	NA	NA	NA	NA	NA	-0.303	-1.035
QC_4d	NA	0.055	0.335	0.33	0.96	0.26	NA	-0.11	4.244	0.915	0.133	NA	0.672	3.604	0.515	NA	0.93	NA	NA	0.216	0.6	NA	0.563	0.317	NA	NA	NA	NA	0.227	NA	NA	NA	0.015	0.744	0.064	NA	NA	0.178	0.273	0.559	1.361	0.225	0.037	0.835	0.054	0.099	0.473	0.91	0.777
QC_6d	0.272	0.795	0.628	0.598	NA	0.572	2.793	-0.534	NA	0.914	NA	0.637	NA	1.534	NA	0.003	NA	-0.303	0.464	NA	NA	0.012	0.568	0.587	-0.107	0.001	0.123	0.135	NA	0.425	0.284	0.175	NA	NA	NA	0.715	0.478	NA	NA	1.083	1.908	NA	0.233	NA	-0.831	0.514	-0.703	NA	NA
QC_4e	NA	0.422	0.429	0.372	1.029	0.477	NA	0.062	3.885	0.969	-0.034	NA	0.353	3.593	0.175	NA	0.535	NA	NA	0.055	0.31	NA	0.632	0.378	NA	NA	NA	NA	0.07	NA	NA	NA	-0.293	-0.825	-0.117	NA	NA	-0.091	-0.071	0.696	1.637	0.047	0.063	0.859	0.487	0.324	0.552	0.514	0.48
QC_4cc	NA	NA	NA	NA	NA	NA	NA	NA	NA	NA	NA	NA	NA	NA	NA	NA	NA	NA	NA	NA	NA	NA	NA	NA	NA	NA	NA	NA	NA	NA	NA	NA	NA	NA	NA	NA	NA	NA	NA	NA	NA	NA	NA	0.619	NA	NA	NA	NA	NA
QC_4f	NA	NA	NA	NA	0.879	NA	NA	NA	4.02	NA	-0.062	NA	0.509	NA	-0.684	NA	0.752	NA	NA	0.005	0.052	NA	NA	NA	NA	NA	NA	NA	0.062	NA	NA	NA	-0.143	-1.128	-1.185	NA	NA	0.123	-0.477	NA	NA	-1.868	NA	NA	NA	NA	NA	-2.233	0.242
QC_7a	0.009	0.539	0.357	0.407	NA	0.459	1.021	-0.367	NA	0.837	NA	0.258	NA	-0.949	NA	0.182	NA	-0.738	0.525	NA	NA	0.083	0.437	0.396	-0.014	0.295	0.194	0.142	NA	0.225	0.178	0.271	NA	NA	NA	0.376	0.466	NA	NA	0.904	2.063	NA	0.046	NA	-1.146	0.219	-0.5	NA	NA
QC_7b	0.217	0.685	0.482	0.482	NA	0.931	1.265	-0.322	NA	0.861	NA	0.39	NA	-0.96	NA	-0.198	NA	-0.322	0.612	NA	NA	0.173	0.489	0.529	0.292	0.388	0.105	-0.015	NA	0.326	0.284	0.265	NA	NA	NA	0.683	0.506	NA	NA	1.046	2.135	NA	0.172	NA	-1.242	0.37	-0.563	NA	NA
QC_6aa	NA	NA	NA	NA	NA	NA	NA	NA	NA	NA	NA	NA	NA	NA	NA	NA	NA	NA	NA	NA	NA	NA	NA	NA	NA	NA	NA	NA	NA	NA	NA	NA	NA	NA	NA	NA	NA	NA	NA	NA	NA	NA	NA	NA	NA	NA	NA	NA	NA
QC_5aa	NA	NA	NA	NA	0.847	NA	NA	NA	3.858	NA	-0.377	NA	0.238	NA	-0.101	NA	0.484	NA	NA	-0.155	-0.018	NA	NA	NA	NA	NA	NA	NA	-0.121	NA	NA	NA	-0.376	0.805	-0.129	NA	NA	-0.292	-0.264	NA	NA	-0.084	NA	0.814	NA	NA	NA	0.523	-0.359
QC_6dd	NA	1.261	0.941	0.767	NA	1.228	NA	-2.914	NA	0.874	NA	NA	NA	2.093	NA	NA	NA	NA	NA	NA	NA	NA	0.625	0.742	NA	NA	NA	NA	NA	NA	NA	NA	NA	NA	NA	NA	NA	NA	NA	1.21	2.089	NA	0.614	NA	-2.499	0.756	-1.37	NA	NA
QC_7c	0.084	0.684	0.584	0.455	NA	0.686	1.547	-0.207	NA	0.78	NA	0.566	NA	-0.159	NA	-0.05	NA	-0.369	0.667	NA	NA	0.124	0.404	0.43	0.202	0.321	0.176	0.116	NA	0.38	0.334	0.21	NA	NA	NA	0.628	0.512	NA	NA	1.146	2.188	NA	0.206	NA	-1.598	0.52	-0.768	NA	NA
QC_7aa	NA	0.938	0.61	0.542	NA	0.735	NA	-0.399	NA	0.835	NA	NA	NA	0.731	NA	NA	NA	NA	NA	NA	NA	NA	0.47	0.315	NA	NA	NA	NA	NA	NA	NA	NA	NA	NA	NA	NA	NA	NA	NA	1.15	2.005	NA	0.288	NA	-1.538	0.469	-0.839	NA	NA
QC_7bb	NA	0.704	0.558	0.434	NA	0.708	NA	-0.313	NA	0.803	NA	NA	NA	-0.384	NA	NA	NA	NA	NA	NA	NA	NA	0.377	0.425	NA	NA	NA	NA	NA	NA	NA	NA	NA	NA	NA	NA	NA	NA	NA	1.071	1.966	NA	0.176	NA	-1.908	0.468	-0.849	NA	NA
[truncated: 224 more rows]
[truncated: 189 more columns]

## Sheet: RatioInfos
Supplementary Table 1. Targeted metabolomics.
	Analyte	MetName	AnalyteNum	AnalyteDen	LevelAnnot	Method	Fam
[truncated: 124 more rows]

## Sheet: Ratio
Supplementary Table 1. Targeted metabolomics.
[truncated: 254 more rows]
[truncated: 75 more columns]

## Sheet: RatioLog2Cen
Supplementary Table 1. Targeted metabolomics.
[truncated: 254 more rows]
[truncated: 75 more columns]
