# Supplementary material for: Circulating acetylated polyamines correlate with Covid-19 severity in cancer patients
Source: Aging (Albany NY). 2021 Sep 13;13(17):20860–85. doi: 10.18632/aging.203525 (PMC8457559; doi:10.18632/aging.203525)
Supplement: Supplementary Table 2 [file aging-13-203525-s003.xls]

## Sheet: SampleInfos
Supplementary Table 2. Untargeted metabolomics.
	Sid	sType	Grp	Color
6	Control-4_1	Sa	Control	#238B45
7	Control-6_2	Sa	Control	#238B45
8	Control-8_4	Sa	Control	#238B45
9	Control-12_6	Sa	Control	#238B45
10	Control-16_10	Sa	Control	#238B45
11	Control-17_11	Sa	Control	#238B45
12	Control-19_13	Sa	Control	#238B45
13	Control-20_14	Sa	Control	#238B45
14	Control-21_15	Sa	Control	#238B45
15	Control-22_16	Sa	Control	#238B45
16	Control-24_17	Sa	Control	#238B45
17	Control-27_21	Sa	Control	#238B45
18	Control-28_22	Sa	Control	#238B45
19	Control-29_23	Sa	Control	#238B45
20	Control-31_25	Sa	Control	#238B45
21	Control-32_26	Sa	Control	#238B45
22	Control-34_27	Sa	Control	#238B45
23	Control-35_28	Sa	Control	#238B45
24	Control-36_29	Sa	Control	#238B45
25	Control-37_30	Sa	Control	#238B45
26	Control-38_31	Sa	Control	#238B45
27	Control-39_32	Sa	Control	#238B45
28	Control-41_34	Sa	Control	#238B45
29	Control-49_38	Sa	Control	#238B45
30	Control-50_39	Sa	Control	#238B45
31	Control-51_40	Sa	Control	#238B45
32	Control-53_41	Sa	Control	#238B45
33	Control-57_42	Sa	Control	#238B45
34	Control-58_43	Sa	Control	#238B45
35	Control-70_46	Sa	Control	#238B45
36	Control-91_48	Sa	Control	#238B45
37	Control-100_49	Sa	Control	#238B45
38	Control-101_50	Sa	Control	#238B45
39	Control-102_51	Sa	Control	#238B45
40	Control-103_52	Sa	Control	#238B45
41	Control-104_53	Sa	Control	#238B45
42	Control-105_54	Sa	Control	#238B45
43	Control-106_55	Sa	Control	#238B45
44	Control-107_56	Sa	Control	#238B45
45	Control-109_57	Sa	Control	#238B45
46	Control-111_58	Sa	Control	#238B45
47	Control-114_59	Sa	Control	#238B45
48	Control-115_60	Sa	Control	#238B45
49	Control-116_61	Sa	Control	#238B45
50	Control-121_62	Sa	Control	#238B45
51	Control-122_63	Sa	Control	#238B45
52	Control-123_64	Sa	Control	#238B45
53	Control-126_65	Sa	Control	#238B45
54	Control-127_66	Sa	Control	#238B45
55	Control-130_70	Sa	Control	#238B45
56	Control-131_71	Sa	Control	#238B45
58	Control-134_74	Sa	Control	#238B45
59	Control-138_76	Sa	Control	#238B45
60	Control-139_77	Sa	Control	#238B45
61	Control-145_78	Sa	Control	#238B45
62	Control-147_79	Sa	Control	#238B45
63	Control-148_80	Sa	Control	#238B45
64	Control-150_82	Sa	Control	#238B45
65	Control-152_84	Sa	Control	#238B45
66	Control-153_85	Sa	Control	#238B45
67	Control-154_86	Sa	Control	#238B45
68	Control-155_87	Sa	Control	#238B45
69	Control-156_88	Sa	Control	#238B45
70	Control-157_89	Sa	Control	#238B45
71	Control-158_90	Sa	Control	#238B45
72	Control-159_91	Sa	Control	#238B45
73	Control-160_92	Sa	Control	#238B45
74	Control-164_94	Sa	Control	#238B45
75	Control-165_95	Sa	Control	#238B45
76	Control-166_96	Sa	Control	#238B45
77	Control-167_97	Sa	Control	#238B45
78	Control-168_98	Sa	Control	#238B45
79	Control-169_99	Sa	Control	#238B45
80	Control-170_100	Sa	Control	#238B45
81	Control-171_101	Sa	Control	#238B45
82	Control-174_105	Sa	Control	#238B45
83	Control-175_106	Sa	Control	#238B45
84	Control-176_107	Sa	Control	#238B45
85	Control-178_111	Sa	Control	#238B45
86	Control-179_112	Sa	Control	#238B45
87	Control-180_113	Sa	Control	#238B45
88	Control-182_114	Sa	Control	#238B45
89	Control-184_115	Sa	Control	#238B45
90	Control-185_116	Sa	Control	#238B45
91	Control-187_117	Sa	Control	#238B45
92	Control-188_118	Sa	Control	#238B45
93	Control-189_119	Sa	Control	#238B45
94	Control-190_120	Sa	Control	#238B45
95	Control-192_121	Sa	Control	#238B45
96	Control-194_123	Sa	Control	#238B45
97	Control-198_126	Sa	Control	#238B45
98	Control-204_131	Sa	Control	#238B45
99	Control-205_132	Sa	Control	#238B45
100	Control-206_133	Sa	Control	#238B45
101	Control-208_135	Sa	Control	#238B45
102	Control-209_136	Sa	Control	#238B45
103	Control-210_137	Sa	Control	#238B45
104	Control-211_138	Sa	Control	#238B45
105	Control-212_139	Sa	Control	#238B45
106	Control-213_140	Sa	Control	#238B45
107	Control-214_141	Sa	Control	#238B45
108	Control-215_142	Sa	Control	#238B45
109	Control-216_143	Sa	Control	#238B45
110	Control-217_144	Sa	Control	#238B45
111	Control-219_145	Sa	Control	#238B45
112	Control-220_146	Sa	Control	#238B45
113	Control-221_147	Sa	Control	#238B45
114	Control-222_148	Sa	Control	#238B45
115	Control-223_149	Sa	Control	#238B45
116	Control-224_150	Sa	Control	#238B45
117	Control-225_151	Sa	Control	#238B45
118	Control-226_152	Sa	Control	#238B45
119	Control-227_153	Sa	Control	#238B45
120	Control-228_154	Sa	Control	#238B45
121	Control-229_155	Sa	Control	#238B45
122	Control-230_156	Sa	Control	#238B45
123	Control-231_157	Sa	Control	#238B45
124	Control-233_158	Sa	Control	#238B45
125	Control-234_159	Sa	Control	#238B45
126	Control-236_160	Sa	Control	#238B45
127	Control-237_161	Sa	Control	#238B45
128	Control-238_162	Sa	Control	#238B45
129	Control-239_163	Sa	Control	#238B45
130	Control-240_164	Sa	Control	#238B45
131	Control-244_165	Sa	Control	#238B45
132	Control-245_166	Sa	Control	#238B45
133	Mild-7_3	Sa	Mild	#FC9272
134	Mild-14_9	Sa	Mild	#FC9272
135	Mild-18_12	Sa	Mild	#FC9272
136	Mild-25_18	Sa	Mild	#FC9272
137	Mild-30_24	Sa	Mild	#FC9272
138	Mild-67_44	Sa	Mild	#FC9272
139	Mild-79_47	Sa	Mild	#FC9272
140	Mild-128_68	Sa	Mild	#FC9272
141	Mild-128_67	Sa	Mild	#FC9272
142	Mild-128_69	Sa	Mild	#FC9272
143	Mild-133_73	Sa	Mild	#FC9272
144	Mild-137_75	Sa	Mild	#FC9272
145	Mild-149_81	Sa	Mild	#FC9272
146	Mild-195_124	Sa	Mild	#FC9272
147	Mild-203_130	Sa	Mild	#FC9272
148	Mild-480_201	Sa	Mild	#FC9272
149	Mild-475_196	Sa	Mild	#FC9272
150	Mild-465_188	Sa	Mild	#FC9272
151	Mild-252_167	Sa	Mild	#FC9272
152	Mild-442_184	Sa	Mild	#FC9272
153	Mild-278_174	Sa	Mild	#FC9272
154	Mild-482_203	Sa	Mild	#FC9272
155	Mild-485_206	Sa	Mild	#FC9272
156	Mild-488_209	Sa	Mild	#FC9272
157	Mild-490_211	Sa	Mild	#FC9272
158	Mild-492_213	Sa	Mild	#FC9272
159	Mild-493_214	Sa	Mild	#FC9272
160	Mild-495_217	Sa	Mild	#FC9272
161	Mild-496_218	Sa	Mild	#FC9272
162	Mild-497_219	Sa	Mild	#FC9272
163	Mild-500_222	Sa	Mild	#FC9272
164	Moderate/Severe-10_5	Sa	Moderate/Severe	#A50F15
165	Moderate/Severe-13_7	Sa	Moderate/Severe	#A50F15
166	Moderate/Severe-13_8	Sa	Moderate/Severe	#A50F15
167	Moderate/Severe-26_20	Sa	Moderate/Severe	#A50F15
168	Moderate/Severe-26_19	Sa	Moderate/Severe	#A50F15
169	Moderate/Severe-40_33	Sa	Moderate/Severe	#A50F15
170	Moderate/Severe-68_45	Sa	Moderate/Severe	#A50F15
171	Moderate/Severe-173_103	Sa	Moderate/Severe	#A50F15
172	Moderate/Severe-173_104	Sa	Moderate/Severe	#A50F15
173	Moderate/Severe-177_109	Sa	Moderate/Severe	#A50F15
174	Moderate/Severe-177_108	Sa	Moderate/Severe	#A50F15
175	Moderate/Severe-177_110	Sa	Moderate/Severe	#A50F15
176	Moderate/Severe-201_128	Sa	Moderate/Severe	#A50F15
177	Moderate/Severe-201_129	Sa	Moderate/Severe	#A50F15
178	Moderate/Severe-462_187	Sa	Moderate/Severe	#A50F15
179	Moderate/Severe-258_168	Sa	Moderate/Severe	#A50F15
180	Moderate/Severe-305_175	Sa	Moderate/Severe	#A50F15
181	Moderate/Severe-258_169	Sa	Moderate/Severe	#A50F15
182	Moderate/Severe-305_176	Sa	Moderate/Severe	#A50F15
183	Moderate/Severe-481_202	Sa	Moderate/Severe	#A50F15
184	Moderate/Severe-466_189	Sa	Moderate/Severe	#A50F15
185	Moderate/Severe-479_200	Sa	Moderate/Severe	#A50F15
186	Moderate/Severe-469_191	Sa	Moderate/Severe	#A50F15
187	Moderate/Severe-477_198	Sa	Moderate/Severe	#A50F15
188	Moderate/Severe-305_177	Sa	Moderate/Severe	#A50F15
189	Moderate/Severe-461_186	Sa	Moderate/Severe	#A50F15
190	Moderate/Severe-472_194	Sa	Moderate/Severe	#A50F15
191	Moderate/Severe-443_185	Sa	Moderate/Severe	#A50F15
192	Moderate/Severe-478_199	Sa	Moderate/Severe	#A50F15
193	Moderate/Severe-470_192	Sa	Moderate/Severe	#A50F15
194	Moderate/Severe-483_204	Sa	Moderate/Severe	#A50F15
195	Moderate/Severe-419_180	Sa	Moderate/Severe	#A50F15
196	Moderate/Severe-473_195	Sa	Moderate/Severe	#A50F15
197	Moderate/Severe-489_210	Sa	Moderate/Severe	#A50F15
198	Moderate/Severe-498_220	Sa	Moderate/Severe	#A50F15
199	Bl_matrice_3a_210215163000	Bl	#N/A	#N/A
200	QC_batch_5a	QC	#N/A	#N/A
201	QC_batch_5b	QC	#N/A	#N/A
202	QC_batch_5c	QC	#N/A	#N/A
203	QC_batch_5d	QC	#N/A	#N/A
204	QC_batch_5e	QC	#N/A	#N/A
205	QC_batch_5f	QC	#N/A	#N/A
206	QC_batch_4a	QC	#N/A	#N/A
207	QC_batch_4b	QC	#N/A	#N/A
208	QC_batch_4c	QC	#N/A	#N/A
209	QC_batch_4d	QC	#N/A	#N/A
210	QC_batch_4e	QC	#N/A	#N/A
211	QC_batch_4f	QC	#N/A	#N/A
212	QC_batch_5aa	QC	#N/A	#N/A
213	QC_batch_5bb	QC	#N/A	#N/A
214	Bl_matrice_3b	Bl	#N/A	#N/A
220	Moderate/Severe-47_36	Sa	Moderate/Severe	#A50F15
221	Moderate/Severe-47_35	Sa	Moderate/Severe	#A50F15
222	Moderate/Severe-47_37	Sa	Moderate/Severe	#A50F15
223	Moderate/Severe-197_125	Sa	Moderate/Severe	#A50F15
224	Moderate/Severe-467_190	Sa	Moderate/Severe	#A50F15
225	Moderate/Severe-272_170	Sa	Moderate/Severe	#A50F15
226	Moderate/Severe-272_171	Sa	Moderate/Severe	#A50F15
227	Moderate/Severe-272_173	Sa	Moderate/Severe	#A50F15
228	Moderate/Severe-427_183	Sa	Moderate/Severe	#A50F15
229	Moderate/Severe-476_197	Sa	Moderate/Severe	#A50F15
230	Moderate/Severe-395_178	Sa	Moderate/Severe	#A50F15
231	Moderate/Severe-471_193	Sa	Moderate/Severe	#A50F15
232	Moderate/Severe-425_182	Sa	Moderate/Severe	#A50F15
233	Moderate/Severe-423_181	Sa	Moderate/Severe	#A50F15
234	Moderate/Severe-272_172	Sa	Moderate/Severe	#A50F15
235	Moderate/Severe-491_212	Sa	Moderate/Severe	#A50F15
236	Moderate/Severe-494_215	Sa	Moderate/Severe	#A50F15
237	Moderate/Severe-494_216	Sa	Moderate/Severe	#A50F15
238	Moderate/Severe-499_221	Sa	Moderate/Severe	#A50F15

## Sheet: MetabolitesInfos
Supplementary Table 2. Untargeted metabolomics.
	Checked	Analyte	MetName	MW	RT	MF	CSID	KEGG	Method
1	TRUE	Nitrosobenzene@9.494-QP	Nitrosobenzene	107.037	9.494	C6H5NO	10989	Microbial metabolism in diverse environments;Other	QP
2	TRUE	4&#39-Aminoacetophenone@10.411-QP	4&#39-Aminoacetophenone	135.068	10.411	C8H9NO	21108576	Metabolic pathways;Biosynthesis of secondary metabolites;Microbial metabolism in diverse environments;2-Oxocarboxylic acid metabolism;Phenylalanine metabolism;Glucosinolate biosynthesis;Other	QP
3	TRUE	2-amino-3-methylbenzoicacid@10.412-QP	2-amino-3-methylbenzoicacid	151.063	10.412	C8H9NO2	#N/A	Metabolic pathways;Biosynthesis of secondary metabolites;Microbial metabolism in diverse environments;Biosynthesis of alkaloids derived from shikimate pathway;2-Oxocarboxylic acid metabolism;Bile secretion;Drug metabolism - cytochrome P450;Glucosinolate biosynthesis;Other	QP
4	TRUE	NSC95113@14.543-QP	NSC95113	162.031	14.543	C4H6F4O2	120045	Biosynthesis of secondary metabolites;Phenylpropanoid biosynthesis;Biosynthesis of phenylpropanoids	QP
5	TRUE	174.57742@7.201-QP	#N/A	174.577	7.201	#N/A	#N/A	#N/A	QP
6	TRUE	255.60405@6.722-QP	#N/A	255.604	6.722	#N/A	#N/A	#N/A	QP
7	TRUE	6336217@7.074-QP	6336217	269.046	7.074	C10H11N3O4S	102783	#N/A	QP
8	TRUE	278.08164@8.284-QP	#N/A	278.082	8.284	C14H15ClN2O2	#N/A	#N/A	QP
9	TRUE	283.04792@9.957-QP	#N/A	283.048	9.957	C8H9N7O3S	#N/A	#N/A	QP
10	TRUE	metominostrobin@14.765-QP	metominostrobin	284.116	14.765	C16H16N2O3	4588319	#N/A	QP
11	TRUE	NPPB@10.583-QP	NPPB	300.11	10.583	C16H16N2O4	4390	#N/A	QP
12	TRUE	303.15003@7.2-QP	#N/A	303.15	7.2	C17H22ClN3	#N/A	#N/A	QP
13	TRUE	alpha-tyvelopyranosyl-(1->3)-alpha-D-mannopyranose@6.705-QP	alpha-tyvelopyranosyl-(1->3)-alpha-D-mannopyranose	310.125	6.705	C12H22O9	59660893	#N/A	QP
14	TRUE	335.05325@9.515-QP	#N/A	335.053	9.515	C9H13N5O7S	#N/A	#N/A	QP
15	TRUE	Pancopride@7.199-QP	Pancopride	349.155	7.199	C18H24ClN3O2	64445	#N/A	QP
16	TRUE	3,6-di-O-methyl-beta-D-glucopyranosyl-(1->4)-alpha-L-rhamnopyranose@7.331-QP	3,6-di-O-methyl-beta-D-glucopyranosyl-(1->4)-alpha-L-rhamnopyranose	354.151	7.331	C14H26O10	26331645	#N/A	QP
17	TRUE	398.11496@7.343-QP	#N/A	398.115	7.343	C17H24N2O5P2	#N/A	#N/A	QP
18	TRUE	398.17741@7.77-QP	#N/A	398.177	7.77	C16H30O11	#N/A	#N/A	QP
19	TRUE	442.20334@8.141-QP	#N/A	442.203	8.141	C18H34O12	#N/A	#N/A	QP
20	TRUE	446.2059@10.422-QP	#N/A	446.206	10.422	C22H31N4O4P	#N/A	#N/A	QP
21	TRUE	464.18487@8.143-QP	#N/A	464.185	8.143	C16H28N6O10	#N/A	#N/A	QP
22	TRUE	492.2917@13.978-QP	#N/A	492.292	13.978	C28H46O3P2	#N/A	#N/A	QP
23	TRUE	504.78758@1.007-QP	#N/A	504.788	1.007	CH4Cl2N5O12P3S2	#N/A	#N/A	QP
24	TRUE	545.2632@12.177-QP	#N/A	545.263	12.177	C30H45NO2P2S	#N/A	#N/A	QP
25	TRUE	549.15305@1.834-QP	#N/A	549.153	1.834	C25H34N3O3P3S	#N/A	#N/A	QP
26	TRUE	588.29271@11.063-QP	#N/A	588.293	11.063	C32H42N6OP2	#N/A	Metabolic pathways;Biosynthesis of secondary metabolites;Other	QP
27	TRUE	595.36805@12.572-QP	#N/A	595.368	12.572	C28H49N7O7	#N/A	#N/A	QP
28	TRUE	714.36201@14.045-QP	#N/A	714.362	14.045	C38H53N8P3	#N/A	#N/A	QP
29	TRUE	801.44276@8.527-QP	#N/A	801.443	8.527	C43H59N7O8	#N/A	#N/A	QP
30	FALSE	Phenylacetylene@1.826-QP	Phenylacetylene	102.047	1.826	C8H6	10364	#N/A	QP
31	FALSE	Choline@0.993-QP	Choline	103.099	0.993	C5H13NO	#N/A	#N/A	QP
32	FALSE	103.98463@0.899-QP	#N/A	103.985	0.899	#N/A	#N/A	#N/A	QP
33	FALSE	104.02588@5.728-QP	#N/A	104.026	5.728	C7H4O	#N/A	#N/A	QP
34	FALSE	3-Hydroxybutyricacid@1.534-QP	3-Hydroxybutyricacid	104.047	1.534	C4H8O3	#N/A	Metabolic pathways;Microbial metabolism in diverse environments;Other	QP
35	FALSE	Glycericacid@1.039-QP	Glycericacid	106.026	1.039	C3H6O4	#N/A	Metabolic pathways;Biosynthesis of secondary metabolites;Microbial metabolism in diverse environments;Other	QP
36	FALSE	Benzaldehyde@1.825-QP	Benzaldehyde	106.041	1.825	C7H6O	235	Metabolic pathways;Microbial metabolism in diverse environments;Degradation of aromatic compounds;Other	QP
37	FALSE	4-Methylphenol@6.798-QP	4-Methylphenol	108.056	6.798	C7H8O	#N/A	#N/A	QP
38	FALSE	5-Amino-1,2-oxazole-4-carbonitrile@9.902-QP	5-Amino-1,2-oxazole-4-carbonitrile	109.027	9.902	C4H3N3O	276020	#N/A	QP
39	FALSE	(2-Hydroxyphenyl)oxidanyl@9.903-QP	(2-Hydroxyphenyl)oxidanyl	109.029	9.903	C6H5O2	13615573	#N/A	QP
40	FALSE	2-aminophenol@4.753-QP	2-aminophenol	109.052	4.753	C6H7NO	#N/A	Metabolic pathways;Microbial metabolism in diverse environments;Other	QP
41	FALSE	2-aminophenol@3.265-QP	2-aminophenol	109.052	3.265	C6H7NO	#N/A	Metabolic pathways;Microbial metabolism in diverse environments;Other	QP
42	FALSE	2-Furoicacid@1.34-QP	2-Furoicacid	112.015	1.34	C5H4O3	10251740	Metabolic pathways;Microbial metabolism in diverse environments;Other	QP
43	FALSE	112.02653@1.395-QP	#N/A	112.027	1.395	#N/A	#N/A	#N/A	QP
44	FALSE	Uracil@1.632-QP	Uracil	112.027	1.632	C4H4N2O2	1141	Metabolic pathways;Other	QP
45	FALSE	113.02193@2.667-QP	#N/A	113.022	2.667	#N/A	#N/A	#N/A	QP
46	FALSE	113.02934@13.289-QP	#N/A	113.029	13.289	#N/A	#N/A	#N/A	QP
47	FALSE	Creatinine@1.186-QP	Creatinine	113.058	1.186	C4H7N3O	568	Metabolic pathways;Other	QP
48	FALSE	e-Caprolactam@4.825-QP	e-Caprolactam	113.084	4.825	C6H11NO	#N/A	Metabolic pathways;Microbial metabolism in diverse environments;Other	QP
49	FALSE	e-Caprolactam@5.429-QP	e-Caprolactam	113.084	5.429	C6H11NO	#N/A	Metabolic pathways;Microbial metabolism in diverse environments;Other	QP
50	FALSE	Trifluoroaceticacid@4.668-QP	Trifluoroaceticacid	113.992	4.668	C2HF3O2	10239201	#N/A	QP
51	FALSE	114.02896@1.041-QP	#N/A	114.029	1.041	CH2N6O	#N/A	#N/A	QP
52	FALSE	2,4(1H,3H)-Pyrimidinedione-2-14C@10.143-QP	2,4(1H,3H)-Pyrimidinedione-2-14C	114.031	10.143	C3[14]CH4N2O2	4953944	Metabolic pathways;Microbial metabolism in diverse environments;Degradation of aromatic compounds;Phenylalanine metabolism;Other	QP
53	FALSE	Glutaricanhydride@3.262-QP	Glutaricanhydride	114.031	3.262	C5H6O3	7652	Metabolic pathways;Microbial metabolism in diverse environments;Degradation of aromatic compounds;Phenylalanine metabolism;Other	QP
54	FALSE	2-hydroxy-2,4-pentadienoate@0.985-QP	2-hydroxy-2,4-pentadienoate	114.031	0.985	C5H6O3	#N/A	Metabolic pathways;Microbial metabolism in diverse environments;Degradation of aromatic compounds;Phenylalanine metabolism;Other	QP
55	FALSE	Beta-cyanoalanine@1.975-QP	Beta-cyanoalanine	114.043	1.975	C4H6N2O2	#N/A	Metabolic pathways;Biosynthesis of secondary metabolites;Other	QP
56	FALSE	1H-Inden-1-ylidene@2.955-QP	1H-Inden-1-ylidene	114.046	2.955	C9H6	4574137	#N/A	QP
57	FALSE	D-(+)-Proline@1.043-QP	D-(+)-Proline	115.063	1.043	C5H9NO2	#N/A	Metabolic pathways;Biosynthesis of secondary metabolites;Biosynthesis of amino acids;ABC transporters;Other	QP
58	FALSE	Proline@0.862-QP	Proline	115.063	0.862	C5H9NO2	#N/A	Metabolic pathways;Biosynthesis of secondary metabolites;Biosynthesis of amino acids;ABC transporters;Other	QP
59	FALSE	thienylphosphine@0.969-QP	thienylphosphine	115.984	0.969	C4H5PS	109635	#N/A	QP
60	FALSE	guanidinoacetate@1.67-QP	guanidinoacetate	116.047	1.67	C3H6N3O2	10252260	#N/A	QP
61	FALSE	116.04972@2.964-QP	#N/A	116.05	2.964	C4H9N2P	#N/A	#N/A	QP
62	FALSE	Cyclohexanethiol@1.044-QP	Cyclohexanethiol	116.066	1.044	C6H12S	14555	#N/A	QP
63	FALSE	2-amino-3-oxobutanoicacid@1.323-QP	2-amino-3-oxobutanoicacid	117.042	1.323	C4H7NO3	#N/A	Metabolic pathways;Biosynthesis of secondary metabolites;Microbial metabolism in diverse environments;Biosynthesis of amino acids;2-Oxocarboxylic acid metabolism;Other	QP
64	FALSE	Indole@2.955-QP	Indole	117.057	2.955	C8H7N	776	Metabolic pathways;Biosynthesis of secondary metabolites;Microbial metabolism in diverse environments;Other	QP
65	FALSE	Phenylacetonitrile@1.826-QP	Phenylacetonitrile	117.057	1.826	C8H7N	#N/A	Metabolic pathways;Biosynthesis of secondary metabolites;Microbial metabolism in diverse environments;Other	QP
66	FALSE	Phenylacetonitrile@9.314-QP	Phenylacetonitrile	117.058	9.314	C8H7N	#N/A	Metabolic pathways;Biosynthesis of secondary metabolites;Microbial metabolism in diverse environments;Other	QP
67	FALSE	Betaine@1.367-QP	Betaine	117.079	1.367	C5H11NO2	#N/A	Metabolic pathways;Biosynthesis of secondary metabolites;Microbial metabolism in diverse environments;Biosynthesis of plant secondary metabolites;Biosynthesis of cofactors;Biosynthesis of amino acids;Biosynthesis of alkaloids derived from shikimate pathway;2-Oxocarboxylic acid metabolism;ABC transporters;Glucosinolate biosynthesis;Other	QP
68	FALSE	Betaine@1.06-QP	Betaine	117.079	1.06	C5H11NO2	#N/A	Metabolic pathways;Biosynthesis of secondary metabolites;Microbial metabolism in diverse environments;Biosynthesis of plant secondary metabolites;Biosynthesis of cofactors;Biosynthesis of amino acids;Biosynthesis of alkaloids derived from shikimate pathway;2-Oxocarboxylic acid metabolism;ABC transporters;Glucosinolate biosynthesis;Other	QP
69	FALSE	Betaine@1.292-QP	Betaine	117.079	1.292	C5H11NO2	#N/A	Metabolic pathways;Biosynthesis of secondary metabolites;Microbial metabolism in diverse environments;Biosynthesis of plant secondary metabolites;Biosynthesis of cofactors;Biosynthesis of amino acids;Biosynthesis of alkaloids derived from shikimate pathway;2-Oxocarboxylic acid metabolism;ABC transporters;Glucosinolate biosynthesis;Other	QP
70	FALSE	1-Chloro-1,2,2-trifluoroethane@0.922-QP	1-Chloro-1,2,2-trifluoroethane	117.979	0.922	C2H2ClF3	83736	#N/A	QP
71	FALSE	Methylmalonicacid@1.498-QP	Methylmalonicacid	118.026	1.498	C4H6O4	473	Metabolic pathways;Biosynthesis of secondary metabolites;Microbial metabolism in diverse environments;Biosynthesis of plant secondary metabolites;Degradation of aromatic compounds;Biosynthesis of alkaloids derived from shikimate pathway;Biosynthesis of phenylpropanoids;Phenylalanine metabolism;Biosynthesis of alkaloids derived from ornithine, lysine and nicotinic acid;Other	QP
72	FALSE	2,4,6-Octatriyn-1-ol@1.411-QP	2,4,6-Octatriyn-1-ol	118.041	1.411	C8H6O	710157	#N/A	QP
73	FALSE	Benzimidazole@11.752-QP	Benzimidazole	118.053	11.752	C7H6N2	5593	#N/A	QP
74	FALSE	118.06062@2.954-QP	#N/A	118.061	2.954	#N/A	#N/A	#N/A	QP
75	FALSE	2-Hydroxyvalericacid@2.669-QP	2-Hydroxyvalericacid	118.062	2.669	C5H10O3	#N/A	Metabolic pathways;Other	QP
76	FALSE	2-Hydroxyvalericacid@2.39-QP	2-Hydroxyvalericacid	118.062	2.39	C5H10O3	#N/A	Metabolic pathways;Other	QP
77	FALSE	2-hydroxy-2-methylbutyricacid@1.97-QP	2-hydroxy-2-methylbutyricacid	118.062	1.97	C5H10O3	#N/A	Metabolic pathways;Other	QP
78	FALSE	Hexanethiol@1.063-QP	Hexanethiol	118.082	1.063	C6H14S	7815	#N/A	QP
79	FALSE	2-methylserine@1.01-QP	2-methylserine	119.058	1.01	C4H9NO3	#N/A	#N/A	QP
80	FALSE	2-Methyl-5-vinylpyridine@1.856-QP	2-Methyl-5-vinylpyridine	119.073	1.856	C8H9N	8486	#N/A	QP
81	FALSE	3-Methyl-4-vinylpyridine@7.911-QP	3-Methyl-4-vinylpyridine	119.073	7.911	C8H9N	389160	#N/A	QP
82	FALSE	Indoline@7.335-QP	Indoline	119.073	7.335	C8H9N	9905	#N/A	QP
83	FALSE	119.9585@0.903-QP	#N/A	119.959	0.903	#N/A	#N/A	#N/A	QP
84	FALSE	6-(Oxomethylene)-2,4-cyclohexadien-1-one@4.772-QP	6-(Oxomethylene)-2,4-cyclohexadien-1-one	120.021	4.772	C7H4O2	212422	#N/A	QP
85	FALSE	6-(Oxomethylene)-2,4-cyclohexadien-1-one@7.495-QP	6-(Oxomethylene)-2,4-cyclohexadien-1-one	120.021	7.495	C7H4O2	212422	#N/A	QP
86	FALSE	6-(Oxomethylene)-2,4-cyclohexadien-1-one@4.043-QP	6-(Oxomethylene)-2,4-cyclohexadien-1-one	120.021	4.043	C7H4O2	212422	#N/A	QP
87	FALSE	120.04158@1.132-QP	#N/A	120.042	1.132	#N/A	#N/A	#N/A	QP
88	FALSE	120.05688@1.41-QP	#N/A	120.057	1.41	#N/A	#N/A	#N/A	QP
89	FALSE	120.05689@9.073-QP	#N/A	120.057	9.073	#N/A	#N/A	#N/A	QP
90	FALSE	120.07615@1.826-QP	#N/A	120.076	1.826	#N/A	#N/A	#N/A	QP
91	FALSE	Tris(hydroxymethyl)aminomethane@1.012-QP	Tris(hydroxymethyl)aminomethane	121.073	1.012	C4H11NO3	6257	#N/A	QP
92	FALSE	4-Hydroxybenzaldehyde@1.411-QP	4-Hydroxybenzaldehyde	122.036	1.411	C7H6O2	123	Metabolic pathways;Biosynthesis of secondary metabolites;Microbial metabolism in diverse environments;Degradation of aromatic compounds;Biosynthesis of alkaloids derived from shikimate pathway;Biosynthesis of phenylpropanoids;Phenylalanine metabolism;Other	QP
93	FALSE	Niacinamide@2.665-QP	Niacinamide	122.048	2.665	C6H6N2O	#N/A	Metabolic pathways;Biosynthesis of cofactors;Other	QP
94	FALSE	Niacinamide@2.259-QP	Niacinamide	122.048	2.259	C6H6N2O	#N/A	Metabolic pathways;Biosynthesis of cofactors;Other	QP
95	FALSE	123.03131@1.419-QP	#N/A	123.031	1.419	#N/A	#N/A	#N/A	QP
96	FALSE	pyrazinamide@6.764-QP	pyrazinamide	123.043	6.764	C5H5N3O	1017	#N/A	QP
97	FALSE	107089@2.636-QP	107089	123.104	2.636	C8H13N	10155	#N/A	QP
98	FALSE	Hydroxybenzoquinone@2.317-QP	Hydroxybenzoquinone	124.016	2.317	C6H4O3	#N/A	Metabolic pathways;Microbial metabolism in diverse environments;Other	QP
99	FALSE	2-methoxyphenol@9.902-QP	2-methoxyphenol	124.052	9.902	C7H8O2	#N/A	Metabolic pathways;Microbial metabolism in diverse environments;Degradation of aromatic compounds;Other	QP
100	FALSE	GV9100000@2.635-QP	GV9100000	124.088	2.635	C8H12O	6277	#N/A	QP
101	FALSE	125.0137@1.221-QP	#N/A	125.014	1.221	C4H4N3P	#N/A	#N/A	QP
102	FALSE	125.01398@1.003-QP	#N/A	125.014	1.003	#N/A	#N/A	Metabolic pathways;ABC transporters;Other	QP
103	FALSE	Taurine@1.19-QP	Taurine	125.014	1.19	C2H7NO3S	1091	Metabolic pathways;ABC transporters;Other	QP
104	FALSE	5-Nitropyrimidine@1.668-QP	5-Nitropyrimidine	125.022	1.668	C4H3N3O2	9215869	#N/A	QP
105	FALSE	5-Butyloxazole@5.011-QP	5-Butyloxazole	125.084	5.011	C7H11NO	4444341	#N/A	QP
106	FALSE	NQ8650000@6.242-QP	NQ8650000	125.084	6.242	C7H11NO	17475	#N/A	QP
107	FALSE	5hydroxymethylfurfural@1.044-QP	5hydroxymethylfurfural	126.031	1.044	C6H6O3	#N/A	Metabolic pathways;Biosynthesis of secondary metabolites;Microbial metabolism in diverse environments;Other	QP
108	FALSE	1-methyl-4-nitroimidazole@4.863-QP	1-methyl-4-nitroimidazole	127.038	4.863	C4H5N3O2	#N/A	Metabolic pathways;Other	QP
109	FALSE	128.00228@10.333-QP	#N/A	128.002	10.333	C5H5O2P	#N/A	Metabolic pathways;Microbial metabolism in diverse environments;Degradation of aromatic compounds;Other	QP
110	FALSE	2-hydroxyhexdienoicacid@1.063-QP	2-hydroxyhexdienoicacid	128.047	1.063	C6H8O3	#N/A	Metabolic pathways;Microbial metabolism in diverse environments;Degradation of aromatic compounds;Other	QP
111	FALSE	4-amino-4-cyanobutanoicacid@1.027-QP	4-amino-4-cyanobutanoicacid	128.058	1.027	C5H8N2O2	#N/A	Metabolic pathways;Other	QP
112	FALSE	4-Oxoproline@1.401-QP	4-Oxoproline	129.042	1.401	C5H7NO3	366185	Metabolic pathways;Biosynthesis of secondary metabolites;Other	QP
113	FALSE	L-Pyroglutamicacid@1.007-QP	L-Pyroglutamicacid	129.042	1.007	C5H7NO3	7127	Metabolic pathways;Biosynthesis of secondary metabolites;Other	QP
114	FALSE	L-Pyroglutamicacid@1.178-QP	L-Pyroglutamicacid	129.042	1.178	C5H7NO3	7127	Metabolic pathways;Biosynthesis of secondary metabolites;Other	QP
115	FALSE	4-oxoproline@6.491-QP	4-oxoproline	129.042	6.491	C5H7NO3	#N/A	Metabolic pathways;Biosynthesis of secondary metabolites;Other	QP
116	FALSE	Isoquinoline@9.305-QP	Isoquinoline	129.057	9.305	C9H7N	8098	#N/A	QP
117	FALSE	Isoquinoline@10.736-QP	Isoquinoline	129.057	10.736	C9H7N	8098	#N/A	QP
118	FALSE	Gramine@2.959-QP	Gramine	129.058	2.959	C11H14N2	#N/A	#N/A	QP
119	FALSE	leucoline@8.153-QP	leucoline	129.058	8.153	C9H7N	6780	#N/A	QP
120	FALSE	129.07816@1.022-QP	#N/A	129.078	1.022	#N/A	#N/A	Metabolic pathways;Biosynthesis of secondary metabolites;Biosynthesis of plant secondary metabolites;Biosynthesis of alkaloids derived from ornithine, lysine and nicotinic acid;Tropane, piperidine and pyridine alkaloid biosynthesis;Other	QP
121	FALSE	4-acetamidobutanal@1.017-QP	4-acetamidobutanal	129.078	1.017	C6H11NO2	389692	Metabolic pathways;Biosynthesis of secondary metabolites;Biosynthesis of plant secondary metabolites;Biosynthesis of alkaloids derived from ornithine, lysine and nicotinic acid;Tropane, piperidine and pyridine alkaloid biosynthesis;Other	QP
122	FALSE	4-acetamidobutanal@0.858-QP	4-acetamidobutanal	129.078	0.858	C6H11NO2	389692	Metabolic pathways;Biosynthesis of secondary metabolites;Biosynthesis of plant secondary metabolites;Biosynthesis of alkaloids derived from ornithine, lysine and nicotinic acid;Tropane, piperidine and pyridine alkaloid biosynthesis;Other	QP
123	FALSE	Metformin@1.059-QP	Metformin	129.101	1.059	C4H11N5	3949	Bile secretion;Other	QP
124	FALSE	2,5-dioxopentanoicacid@2.026-QP	2,5-dioxopentanoicacid	130.026	2.026	C5H6O4	#N/A	Metabolic pathways;Microbial metabolism in diverse environments;2-Oxocarboxylic acid metabolism;Other	QP
125	FALSE	1aH-Indeno(1,2-b)oxirene@1.825-QP	1aH-Indeno(1,2-b)oxirene	130.041	1.825	C9H6O	4446924	#N/A	QP
126	FALSE	1099281@9.003-QP	1099281	130.042	9.003	C9H6O	68257	#N/A	QP
127	FALSE	Quinazoline@9.493-QP	Quinazoline	130.053	9.493	C8H6N2	8855	#N/A	QP
128	FALSE	2-(oxolan-2-yl)aceticacid@2.687-QP	2-(oxolan-2-yl)aceticacid	130.062	2.687	C6H10O3	199092	Metabolic pathways;Biosynthesis of secondary metabolites;Microbial metabolism in diverse environments;Degradation of aromatic compounds;Biosynthesis of amino acids;2-Oxocarboxylic acid metabolism;Glucosinolate biosynthesis;Other	QP
129	FALSE	2-(oxolan-2-yl)aceticacid@2.991-QP	2-(oxolan-2-yl)aceticacid	130.062	2.991	C6H10O3	199092	Metabolic pathways;Biosynthesis of secondary metabolites;Microbial metabolism in diverse environments;Degradation of aromatic compounds;Biosynthesis of amino acids;2-Oxocarboxylic acid metabolism;Glucosinolate biosynthesis;Other	QP
130	FALSE	131.05757@1.581-QP	#N/A	131.058	1.581	#N/A	#N/A	#N/A	QP
131	FALSE	2-amino-4-oxopentanoicacid@1.691-QP	2-amino-4-oxopentanoicacid	131.058	1.691	C5H9NO3	#N/A	Metabolic pathways;Biosynthesis of secondary metabolites;Microbial metabolism in diverse environments;Biosynthesis of plant secondary metabolites;Biosynthesis of cofactors;Biosynthesis of amino acids;ABC transporters;Other	QP
132	FALSE	2-amino-4-oxopentanoicacid@1.02-QP	2-amino-4-oxopentanoicacid	131.058	1.02	C5H9NO3	#N/A	Metabolic pathways;Biosynthesis of secondary metabolites;Microbial metabolism in diverse environments;Biosynthesis of plant secondary metabolites;Biosynthesis of cofactors;Biosynthesis of amino acids;ABC transporters;Other	QP
133	FALSE	2-amino-4-oxopentanoicacid@1.504-QP	2-amino-4-oxopentanoicacid	131.058	1.504	C5H9NO3	#N/A	Metabolic pathways;Biosynthesis of secondary metabolites;Microbial metabolism in diverse environments;Biosynthesis of plant secondary metabolites;Biosynthesis of cofactors;Biosynthesis of amino acids;ABC transporters;Other	QP
134	FALSE	Creatine@1.296-QP	Creatine	131.069	1.296	C4H9N3O2	566	Metabolic pathways;Other	QP
135	FALSE	6-Methylindole@9.299-QP	6-Methylindole	131.073	9.299	C9H9N	121576	Other	QP
136	FALSE	6-Methylindole@2.956-QP	6-Methylindole	131.073	2.956	C9H9N	121576	Other	QP
137	FALSE	L-(-)-Methionine@1.179-QP	L-(-)-Methionine	132.024	1.179	C5H11NO2S	#N/A	#N/A	QP
138	FALSE	D-(-)-Quinicacid@1.087-QP	D-(-)-Quinicacid	132.041	1.087	C7H12O6	#N/A	#N/A	QP
139	FALSE	[(Carbamoylamino)methyl]carbamate@2.09-QP	[(Carbamoylamino)methyl]carbamate	132.042	2.09	C3H6N3O3	26330696	#N/A	QP
140	FALSE	6-Hydroxycaproicacid@4.721-QP	6-Hydroxycaproicacid	132.078	4.721	C6H12O3	13835	Microbial metabolism in diverse environments;Degradation of aromatic compounds;Other	QP
141	FALSE	2-hydroxycaproicacid@5.45-QP	2-hydroxycaproicacid	132.078	5.45	C6H12O3	#N/A	Microbial metabolism in diverse environments;Degradation of aromatic compounds;Other	QP
142	FALSE	132.08902@1.019-QP	#N/A	132.089	1.019	#N/A	#N/A	Metabolic pathways;Biosynthesis of secondary metabolites;Biosynthesis of plant secondary metabolites;Biosynthesis of amino acids;2-Oxocarboxylic acid metabolism;ABC transporters;Biosynthesis of alkaloids derived from ornithine, lysine and nicotinic acid;Other	QP
143	FALSE	2,4-diaminopentanoicacid@0.968-QP	2,4-diaminopentanoicacid	132.089	0.968	C5H12N2O2	#N/A	Metabolic pathways;Biosynthesis of secondary metabolites;Biosynthesis of plant secondary metabolites;Biosynthesis of amino acids;2-Oxocarboxylic acid metabolism;ABC transporters;Biosynthesis of alkaloids derived from ornithine, lysine and nicotinic acid;Other	QP
144	FALSE	133.01124@0.969-QP	#N/A	133.011	0.969	C4H8NPS	#N/A	#N/A	QP
145	FALSE	133.03682@1.015-QP	#N/A	133.037	1.015	#N/A	#N/A	#N/A	QP
146	FALSE	4-hydroxyindole@9.306-QP	4-hydroxyindole	133.052	9.306	C8H7NO	#N/A	Metabolic pathways;Biosynthesis of secondary metabolites;Other	QP
147	FALSE	4-hydroxyindole@4.628-QP	4-hydroxyindole	133.052	4.628	C8H7NO	#N/A	Metabolic pathways;Biosynthesis of secondary metabolites;Other	QP
148	FALSE	4-hydroxyindole@10.416-QP	4-hydroxyindole	133.052	10.416	C8H7NO	#N/A	Metabolic pathways;Biosynthesis of secondary metabolites;Other	QP
149	FALSE	133.99649@0.999-QP	#N/A	133.996	0.999	#N/A	#N/A	#N/A	QP
150	FALSE	134.02081@1.146-QP	#N/A	134.021	1.146	#N/A	#N/A	#N/A	QP
151	FALSE	6-OXOPURINE@2.969-QP	6-OXOPURINE	134.022	2.969	C5H2N4O	11205977	#N/A	QP
152	FALSE	Guanine@2.489-QP	Guanine	134.022	2.489	C5H5N5O	744	#N/A	QP
153	FALSE	D-(-)-Fructose@1.332-QP	D-(-)-Fructose	134.057	1.332	C6H12O6	#N/A	Metabolic pathways;Biosynthesis of secondary metabolites;Biosynthesis of amino acids;2-Oxocarboxylic acid metabolism;Other	QP
154	FALSE	134.07237@10.536-QP	#N/A	134.072	10.536	#N/A	#N/A	#N/A	QP
155	FALSE	Chromane@10.82-QP	Chromane	134.072	10.82	C9H10O	120093	Biosynthesis of secondary metabolites;Biosynthesis of plant secondary metabolites;Phenylpropanoid biosynthesis	QP
156	FALSE	Chavicol@11.568-QP	Chavicol	134.073	11.568	C9H10O	#N/A	Biosynthesis of secondary metabolites;Biosynthesis of plant secondary metabolites;Phenylpropanoid biosynthesis	QP
157	FALSE	135.00634@2.311-QP	#N/A	135.006	2.311	C5HN3O2	#N/A	#N/A	QP
158	FALSE	135.04045@0.995-QP	#N/A	135.04	0.995	#N/A	#N/A	#N/A	QP
159	FALSE	135.06768@5.728-QP	#N/A	135.068	5.728	#N/A	#N/A	#N/A	QP
160	FALSE	2-phenylacetamide@6.226-QP	2-phenylacetamide	135.068	6.226	C8H9NO	#N/A	#N/A	QP
161	FALSE	N-Benzylformamide@1.412-QP	N-Benzylformamide	135.068	1.412	C8H9NO	#N/A	Metabolic pathways;Biosynthesis of secondary metabolites;Microbial metabolism in diverse environments;2-Oxocarboxylic acid metabolism;Phenylalanine metabolism;Glucosinolate biosynthesis;Other	QP
162	FALSE	135.90101@1.103-QP	#N/A	135.901	1.103	#N/A	#N/A	#N/A	QP
163	FALSE	L-Threonicacid@1.035-QP	L-Threonicacid	136.036	1.035	C4H8O5	#N/A	#N/A	QP
164	FALSE	L-Threonicacid@1.191-QP	L-Threonicacid	136.037	1.191	C4H8O5	#N/A	Metabolic pathways;Other	QP
165	FALSE	Hypoxanthine@2.207-QP	Hypoxanthine	136.038	2.207	C5H4N4O	#N/A	Metabolic pathways;Other	QP
166	FALSE	Hypoxanthine@2.722-QP	Hypoxanthine	136.038	2.722	C5H4N4O	#N/A	Metabolic pathways;Other	QP
167	FALSE	2-hydroxyacetophenone@1.41-QP	2-hydroxyacetophenone	136.052	1.41	C8H8O2	#N/A	Metabolic pathways;Biosynthesis of secondary metabolites;Microbial metabolism in diverse environments;Biosynthesis of plant secondary metabolites;Degradation of aromatic compounds;Biosynthesis of alkaloids derived from shikimate pathway;Phenylpropanoid biosynthesis;Phenylalanine metabolism;Other	QP
168	FALSE	2-hydroxyacetophenone@3.366-QP	2-hydroxyacetophenone	136.052	3.366	C8H8O2	#N/A	Metabolic pathways;Biosynthesis of secondary metabolites;Microbial metabolism in diverse environments;Biosynthesis of plant secondary metabolites;Degradation of aromatic compounds;Biosynthesis of alkaloids derived from shikimate pathway;Phenylpropanoid biosynthesis;Phenylalanine metabolism;Other	QP
169	FALSE	1-methylnicotinamide@1.031-QP	1-methylnicotinamide	136.063	1.031	C7H8N2O	#N/A	#N/A	QP
170	FALSE	136.08806@2.976-QP	#N/A	136.088	2.976	#N/A	#N/A	#N/A	QP
171	FALSE	MFCD00661062@2.077-QP	MFCD00661062	137.033	2.077	C3H7NO5	11711	#N/A	QP
172	FALSE	137.04478@1.044-QP	#N/A	137.045	1.044	C3H3N7	#N/A	#N/A	QP
173	FALSE	2-pyridylaceticacid@11.331-QP	2-pyridylaceticacid	137.047	11.331	C7H7NO2	#N/A	Metabolic pathways;Biosynthesis of secondary metabolites;Microbial metabolism in diverse environments;Biosynthesis of plant secondary metabolites;Biosynthesis of cofactors;Degradation of aromatic compounds;Biosynthesis of amino acids;Biosynthesis of alkaloids derived from shikimate pathway;Biosynthesis of phenylpropanoids;Other	QP
174	FALSE	Trigonelline@1.189-QP	Trigonelline	137.047	1.189	C7H7NO2	5369	Metabolic pathways;Biosynthesis of secondary metabolites;Microbial metabolism in diverse environments;Biosynthesis of plant secondary metabolites;Biosynthesis of cofactors;Degradation of aromatic compounds;Biosynthesis of amino acids;Biosynthesis of alkaloids derived from shikimate pathway;Biosynthesis of phenylpropanoids;Other	QP
175	FALSE	Isoniazid@7.954-QP	Isoniazid	137.058	7.954	C6H7N3O	3635	Other	QP
176	FALSE	Isoniazid@6.431-QP	Isoniazid	137.058	6.431	C6H7N3O	3635	Other	QP
177	FALSE	Salicylicacid@7.689-QP	Salicylicacid	138.031	7.689	C7H6O3	331	Metabolic pathways;Biosynthesis of secondary metabolites;Microbial metabolism in diverse environments;Biosynthesis of cofactors;Degradation of aromatic compounds;Biosynthesis of alkaloids derived from shikimate pathway;Bile secretion;Biosynthesis of phenylpropanoids;Phenylalanine metabolism;Other	QP
178	FALSE	3-Amino-2-pyrazinecarboxylate@12.351-QP	3-Amino-2-pyrazinecarboxylate	138.031	12.351	C5H4N3O2	4881950	Metabolic pathways;Biosynthesis of secondary metabolites;Microbial metabolism in diverse environments;Biosynthesis of cofactors;Degradation of aromatic compounds;Biosynthesis of alkaloids derived from shikimate pathway;Bile secretion;Biosynthesis of phenylpropanoids;Phenylalanine metabolism;Other	QP
179	FALSE	2-hydroxy-5-methylquinone@9.802-QP	2-hydroxy-5-methylquinone	138.032	9.802	C7H6O3	13588621	Metabolic pathways;Biosynthesis of secondary metabolites;Microbial metabolism in diverse environments;Biosynthesis of cofactors;Degradation of aromatic compounds;Biosynthesis of alkaloids derived from shikimate pathway;Bile secretion;Biosynthesis of phenylpropanoids;Phenylalanine metabolism;Other	QP
180	FALSE	3-ethylcatechol@9.123-QP	3-ethylcatechol	138.068	9.123	C8H10O2	63462	Metabolic pathways;Microbial metabolism in diverse environments;Degradation of aromatic compounds;Other	QP
181	FALSE	3,6-nonadienal@10.89-QP	3,6-nonadienal	138.104	10.89	C9H14O	#N/A	Biosynthesis of secondary metabolites;Other	QP
182	FALSE	N-Thionylaniline@3.362-QP	N-Thionylaniline	139.009	3.362	C6H5NOS	63904	#N/A	QP
183	FALSE	139.06049@1.081-QP	#N/A	139.06	1.081	#N/A	#N/A	#N/A	QP
184	FALSE	139.06058@1.258-QP	#N/A	139.061	1.258	C3H5N7	#N/A	#N/A	QP
185	FALSE	1-indolizidinone@4.855-QP	1-indolizidinone	139.099	4.855	C8H13NO	#N/A	Metabolic pathways;Biosynthesis of secondary metabolites;Biosynthesis of alkaloids derived from ornithine, lysine and nicotinic acid;Tropane, piperidine and pyridine alkaloid biosynthesis	QP
186	FALSE	139.89566@1.002-QP	#N/A	139.896	1.002	#N/A	#N/A	#N/A	QP
187	FALSE	3-Azido-4-oxo-2-azetidinecarbaldehyde@1.668-QP	3-Azido-4-oxo-2-azetidinecarbaldehyde	140.033	1.668	C4H4N4O2	21378280	#N/A	QP
188	FALSE	1-methylimidazoleaceticacid@1.085-QP	1-methylimidazoleaceticacid	140.058	1.085	C6H8N2O2	#N/A	Metabolic pathways;Other	QP
189	FALSE	140.96733@1.617-QP	#N/A	140.967	1.617	#N/A	#N/A	#N/A	QP
190	FALSE	5-Nitroso-2,4(1H,3H)-pyrimidinedione@1.698-QP	5-Nitroso-2,4(1H,3H)-pyrimidinedione	141.017	1.698	C4H3N3O3	290828	#N/A	QP
191	FALSE	141.03942@0.983-QP	#N/A	141.039	0.983	C2H3N7O	#N/A	#N/A	QP
192	FALSE	Pyrrolo(2,1,5-cd)indolizine@2.955-QP	Pyrrolo(2,1,5-cd)indolizine	141.057	2.955	C10H7N	119810	#N/A	QP
193	FALSE	Ethosuximide@2.572-QP	Ethosuximide	141.079	2.572	C7H11NO2	3175	#N/A	QP
194	FALSE	2,3-Difluorobenzaldehyde@0.874-QP	2,3-Difluorobenzaldehyde	142.023	0.874	C7H4F2O	121323	#N/A	QP
195	FALSE	142.02399@0.991-QP	#N/A	142.024	0.991	C2H2N6O2	#N/A	#N/A	QP
196	FALSE	142.05387@4.364-QP	#N/A	142.054	4.364	#N/A	#N/A	#N/A	QP
197	FALSE	Ectoine@1.405-QP	Ectoine	142.074	1.405	C6H10N2O2	670	#N/A	QP
198	FALSE	Ectoine@9.42-QP	Ectoine	142.074	9.42	C6H10N2O2	670	Metabolic pathways;Microbial metabolism in diverse environments;Other	QP
199	FALSE	Ectoine@9.921-QP	Ectoine	142.074	9.921	C6H10N2O2	670	Metabolic pathways;Microbial metabolism in diverse environments;Other	QP
200	FALSE	Ectoine@1.975-QP	Ectoine	142.074	1.975	C6H10N2O2	670	Metabolic pathways;Microbial metabolism in diverse environments;Other	QP
201	FALSE	142.07495@9.431-QP	#N/A	142.075	9.431	#N/A	#N/A	Metabolic pathways;Microbial metabolism in diverse environments;Other	QP
202	FALSE	trimethadione@1.731-QP	trimethadione	143.058	1.731	C6H9NO3	5374	#N/A	QP
203	FALSE	472437@1.036-QP	472437	143.058	1.036	C6H9NO3	19974018	#N/A	QP
204	FALSE	143.07273@5.859-QP	#N/A	143.073	5.859	#N/A	#N/A	#N/A	QP
205	FALSE	6-Methylquinoline@2.955-QP	6-Methylquinoline	143.073	2.955	C10H9N	#N/A	Other	QP
206	FALSE	DL-Stachydrine@1.19-QP	DL-Stachydrine	143.094	1.19	C7H13NO2	#N/A	ABC transporters	QP
207	FALSE	144.03925@1.006-QP	#N/A	144.039	1.006	C2H4N6O2	#N/A	#N/A	QP
208	FALSE	2-methyleneglutaricacid@1.057-QP	2-methyleneglutaricacid	144.042	1.057	C6H8O4	85862	Microbial metabolism in diverse environments;Other	QP
209	FALSE	2-methyleneglutaricacid@1.195-QP	2-methyleneglutaricacid	144.042	1.195	C6H8O4	85862	Microbial metabolism in diverse environments;Other	QP
210	FALSE	144.05656@10.245-QP	#N/A	144.057	10.245	#N/A	#N/A	#N/A	QP
211	FALSE	1-naphthol@11.19-QP	1-naphthol	144.057	11.19	C10H8O	#N/A	Other	QP
212	FALSE	144.0761@2.954-QP	#N/A	144.076	2.954	C3H8N6O	#N/A	#N/A	QP
213	FALSE	4-guanidinobutyrate@4.735-QP	4-guanidinobutyrate	144.078	4.735	C5H10N3O2	16126651	#N/A	QP
214	FALSE	4-guanidinobutyrate@2.69-QP	4-guanidinobutyrate	144.078	2.69	C5H10N3O2	16126651	Metabolic pathways;Microbial metabolism in diverse environments;Other	QP
215	FALSE	144.11408@10.132-QP	#N/A	144.114	10.132	#N/A	#N/A	#N/A	QP
216	FALSE	Caprylicacid@12.745-QP	Caprylicacid	144.114	12.745	C8H16O2	#N/A	#N/A	QP
217	FALSE	Caprylicacid@13.311-QP	Caprylicacid	144.114	13.311	C8H16O2	#N/A	#N/A	QP
218	FALSE	4-Indolecarbaldehyde@9.337-QP	4-Indolecarbaldehyde	145.052	9.337	C9H7NO	#N/A	#N/A	QP
219	FALSE	4-Indolecarbaldehyde@2.017-QP	4-Indolecarbaldehyde	145.052	2.017	C9H7NO	#N/A	#N/A	QP
220	FALSE	8-hydroxyquinoline@2.955-QP	8-hydroxyquinoline	145.052	2.955	C9H7NO	#N/A	#N/A	QP
221	FALSE	8-hydroxyquinoline@6.761-QP	8-hydroxyquinoline	145.052	6.761	C9H7NO	#N/A	#N/A	QP
222	FALSE	8-hydroxyquinoline@5.837-QP	8-hydroxyquinoline	145.052	5.837	C9H7NO	#N/A	#N/A	QP
223	FALSE	145.06325@9.489-QP	#N/A	145.063	9.489	#N/A	#N/A	#N/A	QP
224	FALSE	2-amino-5-oxohexanoicacid@2.198-QP	2-amino-5-oxohexanoicacid	145.073	2.198	C6H11NO3	#N/A	Metabolic pathways;Biosynthesis of secondary metabolites;Biosynthesis of plant secondary metabolites;Biosynthesis of amino acids;Biosynthesis of alkaloids derived from ornithine, lysine and nicotinic acid;Tropane, piperidine and pyridine alkaloid biosynthesis;Other	QP
225	FALSE	2-amino-5-oxohexanoicacid@1.559-QP	2-amino-5-oxohexanoicacid	145.073	1.559	C6H11NO3	#N/A	Metabolic pathways;Biosynthesis of secondary metabolites;Biosynthesis of plant secondary metabolites;Biosynthesis of amino acids;Biosynthesis of alkaloids derived from ornithine, lysine and nicotinic acid;Tropane, piperidine and pyridine alkaloid biosynthesis;Other	QP
226	FALSE	2-amino-5-oxohexanoicacid@1.033-QP	2-amino-5-oxohexanoicacid	145.074	1.033	C6H11NO3	#N/A	Metabolic pathways;Biosynthesis of secondary metabolites;Biosynthesis of plant secondary metabolites;Biosynthesis of amino acids;Biosynthesis of alkaloids derived from ornithine, lysine and nicotinic acid;Tropane, piperidine and pyridine alkaloid biosynthesis;Other	QP
227	FALSE	3-amino-4-methylhexanoicacid@1.058-QP	3-amino-4-methylhexanoicacid	145.11	1.058	C7H15NO2	#N/A	#N/A	QP
228	FALSE	145.96822@10.789-QP	#N/A	145.968	10.789	#N/A	#N/A	#N/A	QP
229	FALSE	2-oxoglutaricacid@1.338-QP	2-oxoglutaricacid	146.021	1.338	C5H6O5	#N/A	Metabolic pathways;Biosynthesis of secondary metabolites;Microbial metabolism in diverse environments;Biosynthesis of plant secondary metabolites;Biosynthesis of cofactors;Biosynthesis of amino acids;Biosynthesis of alkaloids derived from shikimate pathway;2-Oxocarboxylic acid metabolism;Bile secretion;Biosynthesis of phenylpropanoids;Biosynthesis of alkaloids derived from ornithine, lysine and n…	QP
230	FALSE	Coumarin@1.371-QP	Coumarin	146.04	1.371	C9H6O2	#N/A	#N/A	QP
231	FALSE	Adipicacid@3.677-QP	Adipicacid	146.057	3.677	C6H10O4	191	Metabolic pathways;Biosynthesis of secondary metabolites;Microbial metabolism in diverse environments;Biosynthesis of cofactors;Degradation of aromatic compounds;Biosynthesis of amino acids;2-Oxocarboxylic acid metabolism;Other	QP
232	FALSE	2,2-dimethylsuccinicacid@1.757-QP	2,2-dimethylsuccinicacid	146.057	1.757	C6H10O4	#N/A	Metabolic pathways;Biosynthesis of secondary metabolites;Microbial metabolism in diverse environments;Biosynthesis of cofactors;Degradation of aromatic compounds;Biosynthesis of amino acids;2-Oxocarboxylic acid metabolism;Other	QP
233	FALSE	D-(-)-Glutamine@1.241-QP	D-(-)-Glutamine	146.068	1.241	C5H10N2O3	128633	#N/A	QP
234	FALSE	146.06835@6.485-QP	#N/A	146.068	6.485	#N/A	#N/A	#N/A	QP
235	FALSE	D-(-)-Glutamine@1.192-QP	D-(-)-Glutamine	146.068	1.192	C5H10N2O3	128633	Metabolic pathways;Microbial metabolism in diverse environments;Biosynthesis of plant secondary metabolites;Biosynthesis of cofactors;Biosynthesis of amino acids;ABC transporters;Other	QP
236	FALSE	DL-Glutamine@1.016-QP	DL-Glutamine	146.069	1.016	C5H10N2O3	718	Metabolic pathways;Microbial metabolism in diverse environments;Biosynthesis of plant secondary metabolites;Biosynthesis of cofactors;Biosynthesis of amino acids;ABC transporters;Other	QP
237	FALSE	1-(1H-Pyrazol-5-yl)pyridinium@9.489-QP	1-(1H-Pyrazol-5-yl)pyridinium	146.071	9.489	C8H8N3	16434736	#N/A	QP
238	FALSE	146.10451@0.884-QP	#N/A	146.105	0.884	#N/A	#N/A	#N/A	QP
239	FALSE	3,5-diaminohexanoicacid@1.119-QP	3,5-diaminohexanoicacid	146.105	1.119	C6H14N2O2	#N/A	Metabolic pathways;Biosynthesis of secondary metabolites;Microbial metabolism in diverse environments;Biosynthesis of plant secondary metabolites;Biosynthesis of amino acids;2-Oxocarboxylic acid metabolism;ABC transporters;Biosynthesis of alkaloids derived from ornithine, lysine and nicotinic acid;Tropane, piperidine and pyridine alkaloid biosynthesis;Other	QP
240	FALSE	3,5-diaminohexanoicacid@0.863-QP	3,5-diaminohexanoicacid	146.105	0.863	C6H14N2O2	#N/A	Metabolic pathways;Biosynthesis of secondary metabolites;Microbial metabolism in diverse environments;Biosynthesis of plant secondary metabolites;Biosynthesis of amino acids;2-Oxocarboxylic acid metabolism;ABC transporters;Biosynthesis of alkaloids derived from ornithine, lysine and nicotinic acid;Tropane, piperidine and pyridine alkaloid biosynthesis;Other	QP
241	FALSE	146.99602@1.005-QP	#N/A	146.996	1.005	C7HNO3	#N/A	#N/A	QP
242	FALSE	3-Thiomorpholinecarboxylicacid@1.227-QP	3-Thiomorpholinecarboxylicacid	147.035	1.227	C5H9NO2S	389150	#N/A	QP
243	FALSE	L-Pyroglutamicacid@1.023-QP	L-Pyroglutamicacid	147.052	1.023	C5H7NO3	7127	Metabolic pathways;Biosynthesis of secondary metabolites;Microbial metabolism in diverse environments;Biosynthesis of plant secondary metabolites;Biosynthesis of cofactors;Biosynthesis of amino acids;2-Oxocarboxylic acid metabolism;ABC transporters;Biosynthesis of alkaloids derived from ornithine, lysine and nicotinic acid;Other	QP
244	FALSE	L-Pyroglutamicacid@1.197-QP	L-Pyroglutamicacid	147.053	1.197	C5H7NO3	7127	Metabolic pathways;Biosynthesis of secondary metabolites;Microbial metabolism in diverse environments;Biosynthesis of plant secondary metabolites;Biosynthesis of cofactors;Biosynthesis of amino acids;2-Oxocarboxylic acid metabolism;ABC transporters;Biosynthesis of alkaloids derived from ornithine, lysine and nicotinic acid;Other	QP
245	FALSE	1-(1H-Benzimidazol-2-yl)methanamine@9.489-QP	1-(1H-Benzimidazol-2-yl)methanamine	147.079	9.489	C8H9N3	128638	#N/A	QP
246	FALSE	147.96522@10.792-QP	#N/A	147.965	10.792	#N/A	#N/A	#N/A	QP
247	FALSE	1-Chloro-2,3-difluorobenzene@1.195-QP	1-Chloro-2,3-difluorobenzene	147.99	1.195	C6H3ClF2	2062907	#N/A	QP
248	FALSE	2-dehydro-3-deoxyarabinonicacid@1.383-QP	2-dehydro-3-deoxyarabinonicacid	148.036	1.383	C5H8O5	#N/A	#N/A	QP
249	FALSE	Xylonolactone@1.388-QP	Xylonolactone	148.037	1.388	C5H8O5	#N/A	Metabolic pathways;Microbial metabolism in diverse environments;Biosynthesis of amino acids;2-Oxocarboxylic acid metabolism;Other	QP
250	FALSE	3-hydroxy-1-indanone@1.827-QP	3-hydroxy-1-indanone	148.052	1.827	C9H8O2	#N/A	Metabolic pathways;Biosynthesis of secondary metabolites;Microbial metabolism in diverse environments;Biosynthesis of plant secondary metabolites;Degradation of aromatic compounds;Biosynthesis of alkaloids derived from shikimate pathway;Phenylpropanoid biosynthesis;Biosynthesis of phenylpropanoids;Phenylalanine metabolism;Other	QP
251	FALSE	149.00587@0.994-QP	#N/A	149.006	0.994	C4H8NOPS	#N/A	#N/A	QP
252	FALSE	L-(-)-Methionine@1.18-QP	L-(-)-Methionine	149.05	1.18	C5H11NO2S	#N/A	Metabolic pathways;Biosynthesis of secondary metabolites;Biosynthesis of plant secondary metabolites;Biosynthesis of cofactors;Biosynthesis of amino acids;2-Oxocarboxylic acid metabolism;ABC transporters;Glucosinolate biosynthesis;Other	QP
253	FALSE	2-carboxybenzaldehyde@2.722-QP	2-carboxybenzaldehyde	150.031	2.722	C8H6O3	#N/A	Metabolic pathways;Microbial metabolism in diverse environments;Phenylalanine metabolism;Other	QP
254	FALSE	2-carboxybenzaldehyde@5.985-QP	2-carboxybenzaldehyde	150.031	5.985	C8H6O3	#N/A	Metabolic pathways;Microbial metabolism in diverse environments;Phenylalanine metabolism;Other	QP
255	FALSE	150.04001@1.002-QP	#N/A	150.04	1.002	C3H2N8	#N/A	#N/A	QP
256	FALSE	150.05193@1.059-QP	#N/A	150.052	1.059	#N/A	#N/A	Metabolic pathways;ABC transporters;Other	QP
257	FALSE	1-methylhypoxanthine@4.005-QP	1-methylhypoxanthine	150.054	4.005	C6H6N4O	63930	#N/A	QP
258	FALSE	Hydrocinnamicacid@10.293-QP	Hydrocinnamicacid	150.067	10.293	C9H10O2	#N/A	#N/A	QP
259	FALSE	3-methoxyacetophenone@11.248-QP	3-methoxyacetophenone	150.068	11.248	C9H10O2	#N/A	Metabolic pathways;Biosynthesis of secondary metabolites;Microbial metabolism in diverse environments;Degradation of aromatic compounds;Biosynthesis of alkaloids derived from shikimate pathway;Phenylpropanoid biosynthesis;Biosynthesis of phenylpropanoids;Phenylalanine metabolism;Other	QP
260	FALSE	150.10321@12.35-QP	#N/A	150.103	12.35	#N/A	#N/A	#N/A	QP
261	FALSE	150.10351@12.011-QP	#N/A	150.104	12.011	#N/A	#N/A	#N/A	QP
262	FALSE	Carvacrol@12.351-QP	Carvacrol	150.104	12.351	C10H14O	21105867	Metabolic pathways;Biosynthesis of secondary metabolites;Microbial metabolism in diverse environments;Degradation of aromatic compounds;Other	QP
263	FALSE	150.13644@1.017-QP	#N/A	150.136	1.017	#N/A	#N/A	#N/A	QP
264	FALSE	151.00115@1.669-QP	#N/A	151.001	1.669	C5HN3O3	#N/A	#N/A	QP
265	FALSE	1,2-Benzisothiazolin-3-one@21.19-QP	1,2-Benzisothiazolin-3-one	151.008	21.19	C7H5NOS	#N/A	#N/A	QP
266	FALSE	1,2-Benzisothiazolin-3-one@20.013-QP	1,2-Benzisothiazolin-3-one	151.008	20.013	C7H5NOS	#N/A	#N/A	QP
267	FALSE	1,2-Benzisothiazolin-3-one@9.603-QP	1,2-Benzisothiazolin-3-one	151.008	9.603	C7H5NOS	#N/A	#N/A	QP
268	FALSE	1,2-Benzisothiazolin-3-one@10.171-QP	1,2-Benzisothiazolin-3-one	151.009	10.171	C7H5NOS	#N/A	#N/A	QP
269	FALSE	151.02399@1-QP	#N/A	151.024	1	C3HN7O	#N/A	#N/A	QP
270	FALSE	Guanine@1.841-QP	Guanine	151.049	1.841	C5H5N5O	744	Metabolic pathways;Other	QP
271	FALSE	Guanine@2.974-QP	Guanine	151.049	2.974	C5H5N5O	744	Metabolic pathways;Other	QP
272	FALSE	Guanine@2.488-QP	Guanine	151.049	2.488	C5H5N5O	744	Metabolic pathways;Other	QP
273	FALSE	Paracetamol@7.488-QP	Paracetamol	151.062	7.488	C8H9NO2	1906	#N/A	QP
274	FALSE	Paracetamol@4.171-QP	Paracetamol	151.063	4.171	C8H9NO2	1906	Metabolic pathways;Biosynthesis of secondary metabolites;Microbial metabolism in diverse environments;Biosynthesis of alkaloids derived from shikimate pathway;2-Oxocarboxylic acid metabolism;Bile secretion;Drug metabolism - cytochrome P450;Glucosinolate biosynthesis;Other	QP
275	FALSE	2-Acetamidophenol@4.753-QP	2-Acetamidophenol	151.063	4.753	C8H9NO2	#N/A	Metabolic pathways;Biosynthesis of secondary metabolites;Microbial metabolism in diverse environments;Biosynthesis of alkaloids derived from shikimate pathway;2-Oxocarboxylic acid metabolism;Bile secretion;Drug metabolism - cytochrome P450;Glucosinolate biosynthesis;Other	QP
276	FALSE	Paracetamol@3.264-QP	Paracetamol	151.063	3.264	C8H9NO2	1906	Metabolic pathways;Biosynthesis of secondary metabolites;Microbial metabolism in diverse environments;Biosynthesis of alkaloids derived from shikimate pathway;2-Oxocarboxylic acid metabolism;Bile secretion;Drug metabolism - cytochrome P450;Glucosinolate biosynthesis;Other	QP
277	FALSE	151.89312@0.987-QP	#N/A	151.893	0.987	#N/A	#N/A	#N/A	QP
278	FALSE	Xanthine@2.292-QP	Xanthine	152.033	2.292	C5H4N4O2	1151	Metabolic pathways;Biosynthesis of secondary metabolites;Microbial metabolism in diverse environments;Biosynthesis of plant secondary metabolites;Other	QP
279	FALSE	2-Hydrazinonicotinate@9.587-QP	2-Hydrazinonicotinate	152.046	9.587	C6H6N3O2	4181461	#N/A	QP
280	FALSE	2-Hydrazinonicotinate@7.249-QP	2-Hydrazinonicotinate	152.047	7.249	C6H6N3O2	4181461	#N/A	QP
281	FALSE	2-Hydrazinonicotinate@12.351-QP	2-Hydrazinonicotinate	152.047	12.351	C6H6N3O2	4181461	#N/A	QP
282	FALSE	2-hydroxyphenylaceticacid@5.76-QP	2-hydroxyphenylaceticacid	152.047	5.76	C8H8O3	#N/A	#N/A	QP
283	FALSE	Vanillin@8.517-QP	Vanillin	152.047	8.517	C8H8O3	13860434	Metabolic pathways;Biosynthesis of secondary metabolites;Microbial metabolism in diverse environments;Degradation of aromatic compounds;Biosynthesis of alkaloids derived from shikimate pathway;Biosynthesis of phenylpropanoids;Phenylalanine metabolism;Other	QP
284	FALSE	2-amino-4-nitrotoluene@3.338-QP	2-amino-4-nitrotoluene	152.058	3.338	C7H8N2O2	#N/A	Metabolic pathways;Microbial metabolism in diverse environments;Other	QP
285	FALSE	2-amino-4-nitrotoluene@4.133-QP	2-amino-4-nitrotoluene	152.058	4.133	C7H8N2O2	#N/A	Metabolic pathways;Microbial metabolism in diverse environments;Other	QP
286	FALSE	152.1192@12.35-QP	#N/A	152.119	12.35	#N/A	#N/A	#N/A	QP
287	FALSE	153.01699@2.263-QP	#N/A	153.017	2.263	C5H3N3O3	#N/A	#N/A	QP
288	FALSE	3-hydroxy-2-methylpyridine-5-carboxylicacid@4.131-QP	3-hydroxy-2-methylpyridine-5-carboxylicacid	153.042	4.131	C7H7NO3	#N/A	Metabolic pathways;Biosynthesis of secondary metabolites;Microbial metabolism in diverse environments;Biosynthesis of cofactors;Other	QP
289	FALSE	2-dimethylaminoethylphosphonicacid@9.798-QP	2-dimethylaminoethylphosphonicacid	153.055	9.798	C4H12NO3P	88081	Other	QP
290	FALSE	Dopamine@5.713-QP	Dopamine	153.078	5.713	C8H11NO2	#N/A	Metabolic pathways;Biosynthesis of secondary metabolites;Biosynthesis of plant secondary metabolites;Biosynthesis of alkaloids derived from shikimate pathway;Bile secretion;Other	QP
291	FALSE	Pseudopelletierine@2.954-QP	Pseudopelletierine	153.115	2.954	C9H15NO	21244466	Biosynthesis of secondary metabolites;Biosynthesis of alkaloids derived from ornithine, lysine and nicotinic acid;Tropane, piperidine and pyridine alkaloid biosynthesis	QP
292	FALSE	154.03491@0.995-QP	#N/A	154.035	0.995	C2H2N8O	#N/A	#N/A	QP
293	FALSE	154.0367@1.368-QP	#N/A	154.037	1.368	#N/A	#N/A	#N/A	QP
294	FALSE	Acipimox@1.367-QP	Acipimox	154.037	1.367	C6H6N2O3	4470534	Metabolic pathways;Other	QP
295	FALSE	Hydroxytyrosol@8.524-QP	Hydroxytyrosol	154.062	8.524	C8H10O3	74680	Microbial metabolism in diverse environments;Other	QP
296	FALSE	Hydroxytyrosol@7.407-QP	Hydroxytyrosol	154.062	7.407	C8H10O3	74680	Microbial metabolism in diverse environments;Other	QP
297	FALSE	154.07124@0.888-QP	#N/A	154.071	0.888	C3H6N8	#N/A	#N/A	QP
298	FALSE	155.00287@9.491-QP	#N/A	155.003	9.491	#N/A	#N/A	#N/A	QP
299	FALSE	1-aminopropanylphosphate@1.087-QP	1-aminopropanylphosphate	155.034	1.087	C3H10NO4P	#N/A	Other	QP
300	FALSE	Histidine@0.998-QP	Histidine	155.069	0.998	C6H9N3O2	#N/A	Metabolic pathways;Biosynthesis of secondary metabolites;Biosynthesis of plant secondary metabolites;Biosynthesis of amino acids;ABC transporters;Other	QP
301	FALSE	Histidine@1.156-QP	Histidine	155.069	1.156	C6H9N3O2	#N/A	Metabolic pathways;Biosynthesis of secondary metabolites;Biosynthesis of plant secondary metabolites;Biosynthesis of amino acids;ABC transporters;Other	QP
302	FALSE	Histidine@0.884-QP	Histidine	155.069	0.884	C6H9N3O2	#N/A	Metabolic pathways;Biosynthesis of secondary metabolites;Biosynthesis of plant secondary metabolites;Biosynthesis of amino acids;ABC transporters;Other	QP
303	FALSE	155.08388@8.055-QP	#N/A	155.084	8.055	#N/A	#N/A	#N/A	QP
304	FALSE	Retronecine@6.735-QP	Retronecine	155.094	6.735	C8H13NO2	10180	Biosynthesis of secondary metabolites;Biosynthesis of alkaloids derived from ornithine, lysine and nicotinic acid;Tropane, piperidine and pyridine alkaloid biosynthesis	QP
305	FALSE	155.88711@0.994-QP	#N/A	155.887	0.994	#N/A	#N/A	#N/A	QP
306	FALSE	155.9252@1.299-QP	#N/A	155.925	1.299	#N/A	#N/A	#N/A	QP
307	FALSE	156.01608@1.394-QP	#N/A	156.016	1.394	C7H9PS	#N/A	#N/A	QP
308	FALSE	N-ethylammelide@1.459-QP	N-ethylammelide	156.064	1.459	C5H8N4O2	16561	Microbial metabolism in diverse environments;Other	QP
309	FALSE	156.11407@12.277-QP	#N/A	156.114	12.277	#N/A	#N/A	#N/A	QP
310	FALSE	156.11415@10.551-QP	#N/A	156.114	10.551	#N/A	#N/A	#N/A	QP
311	FALSE	Benzenesulfonamide@9.489-QP	Benzenesulfonamide	157.019	9.489	C6H7NO2S	#N/A	#N/A	QP
312	FALSE	DA9380000@10.068-QP	DA9380000	157.019	10.068	C6H7NO2S	7092	#N/A	QP
313	FALSE	DA9380000@4.116-QP	DA9380000	157.019	4.116	C6H7NO2S	7092	#N/A	QP
314	FALSE	DA9380000@7.079-QP	DA9380000	157.019	7.079	C6H7NO2S	7092	#N/A	QP
315	FALSE	AMIDINOPROLINE@1.005-QP	AMIDINOPROLINE	157.085	1.005	C6H11N3O2	9818706	#N/A	QP
316	FALSE	157.10944@2.586-QP	#N/A	157.109	2.586	#N/A	#N/A	#N/A	QP
317	FALSE	tranexamicacid@1.393-QP	tranexamicacid	157.11	1.393	C8H15NO2	10482000	#N/A	QP
318	FALSE	Benzenesulfonicacid@1.99-QP	Benzenesulfonicacid	158.003	1.99	C6H6O3S	7093	#N/A	QP
319	FALSE	2,6-Dioxo(4-~14~C)-1,2,3,6-tetrahydro-4-pyrimidinecarboxylicacid@2.195-QP	2,6-Dioxo(4-~14~C)-1,2,3,6-tetrahydro-4-pyrimidinecarboxylicacid	158.02	2.195	C4[14]CH4N2O4	24766514	#N/A	QP
320	FALSE	158.05499@1.11-QP	#N/A	158.055	1.11	#N/A	#N/A	#N/A	QP
321	FALSE	5-hydroxyectoine@1.028-QP	5-hydroxyectoine	158.069	1.028	C6H10N2O3	#N/A	Metabolic pathways;Microbial metabolism in diverse environments;Other	QP
322	FALSE	158.09327@9.949-QP	#N/A	158.093	9.949	#N/A	#N/A	#N/A	QP
323	FALSE	158.12976@10.888-QP	#N/A	158.13	10.888	#N/A	#N/A	#N/A	QP
324	FALSE	(1H-1,2,4-triazol-5-ylthio)aceticacid@2.098-QP	(1H-1,2,4-triazol-5-ylthio)aceticacid	159.009	2.098	C4H5N3O2S	561074	#N/A	QP
325	FALSE	159.02678@1.048-QP	#N/A	159.027	1.048	C6H10NPS	#N/A	#N/A	QP
326	FALSE	159.02934@1.206-QP	#N/A	159.029	1.206	C5HN7	#N/A	#N/A	QP
327	FALSE	159.03455@10.89-QP	#N/A	159.035	10.89	#N/A	#N/A	#N/A	QP
328	FALSE	159.03455@13.289-QP	#N/A	159.035	13.289	#N/A	#N/A	#N/A	QP
329	FALSE	Citiolone@9.906-QP	Citiolone	159.035	9.906	C6H9NO2S	13864	#N/A	QP
330	FALSE	Citiolone@7.538-QP	Citiolone	159.035	7.538	C6H9NO2S	13864	#N/A	QP
331	FALSE	Citiolone@8.078-QP	Citiolone	159.035	8.078	C6H9NO2S	13864	#N/A	QP
332	FALSE	6-methoxyquinoline@2.956-QP	6-methoxyquinoline	159.068	2.956	C10H9NO	#N/A	Metabolic pathways;Biosynthesis of secondary metabolites;Other	QP
333	FALSE	6-[(2-hydroxyethyl)(methyl)amino]nicotinonitrile@9.49-QP	6-[(2-hydroxyethyl)(methyl)amino]nicotinonitrile	159.079	9.49	C9H11N3O	#N/A	#N/A	QP
334	FALSE	UQ6109000@10.411-QP	UQ6109000	159.079	10.411	C9H9N3	120419	#N/A	QP
335	FALSE	UQ6109000@7.541-QP	UQ6109000	159.079	7.541	C9H9N3	120419	#N/A	QP
336	FALSE	Valerylglycine@1.044-QP	Valerylglycine	159.089	1.044	C7H13NO3	#N/A	Metabolic pathways;Tropane, piperidine and pyridine alkaloid biosynthesis;Other	QP
337	FALSE	delta-guanidinovalericacid@1.399-QP	delta-guanidinovalericacid	159.1	1.399	C6H13N3O2	141008	#N/A	QP
338	FALSE	159.12492@10.818-QP	#N/A	159.125	10.818	#N/A	#N/A	#N/A	QP
339	FALSE	Pregabalin@4.068-QP	Pregabalin	159.125	4.068	C8H17NO2	4589156	#N/A	QP
340	FALSE	Acetyl-?-methylcholine@1.41-QP	Acetyl-?-methylcholine	159.125	1.41	C8H17NO2	#N/A	#N/A	QP
341	FALSE	Pregabalin@2.662-QP	Pregabalin	159.125	2.662	C8H17NO2	4589156	#N/A	QP
342	FALSE	Acetyl-?-methylcholine@1.178-QP	Acetyl-?-methylcholine	159.125	1.178	C8H17NO2	#N/A	#N/A	QP
343	FALSE	Pregabalin@3.209-QP	Pregabalin	159.125	3.209	C8H17NO2	4589156	#N/A	QP
344	FALSE	Anatabine@2.953-QP	Anatabine	160.099	2.953	C10H12N2	229558	Metabolic pathways;Biosynthesis of secondary metabolites;Microbial metabolism in diverse environments;Biosynthesis of plant secondary metabolites;Biosynthesis of alkaloids derived from shikimate pathway;Biosynthesis of alkaloids derived from ornithine, lysine and nicotinic acid;Tropane, piperidine and pyridine alkaloid biosynthesis;Other	QP
345	FALSE	160.10889@9.771-QP	#N/A	160.109	9.771	#N/A	#N/A	Drug metabolism - cytochrome P450;Other	QP
346	FALSE	160.10895@8.126-QP	#N/A	160.109	8.126	#N/A	#N/A	Drug metabolism - cytochrome P450;Other	QP
347	FALSE	3-hydroxyvalproicacid@10.625-QP	3-hydroxyvalproicacid	160.109	10.625	C8H16O3	#N/A	Drug metabolism - cytochrome P450;Other	QP
348	FALSE	160.1242@15.966-QP	#N/A	160.124	15.966	#N/A	#N/A	#N/A	QP
349	FALSE	161.04243@1.092-QP	#N/A	161.042	1.092	C6H12NPS	#N/A	#N/A	QP
350	FALSE	S-Allyl-L-cysteine@1.601-QP	S-Allyl-L-cysteine	161.051	1.601	C6H11NO2S	7969672	#N/A	QP
351	FALSE	2-aminoadipicacid@1.412-QP	2-aminoadipicacid	161.068	1.412	C6H11NO4	#N/A	Metabolic pathways;Biosynthesis of secondary metabolites;Microbial metabolism in diverse environments;Biosynthesis of amino acids;2-Oxocarboxylic acid metabolism;Other	QP
352	FALSE	2-aminoadipicacid@1.038-QP	2-aminoadipicacid	161.068	1.038	C6H11NO4	#N/A	Metabolic pathways;Biosynthesis of secondary metabolites;Microbial metabolism in diverse environments;Biosynthesis of amino acids;2-Oxocarboxylic acid metabolism;Other	QP
353	FALSE	L(-)-Carnitine@1.191-QP	L(-)-Carnitine	161.105	1.191	C7H15NO3	#N/A	Bile secretion;Other	QP
354	FALSE	L(-)-Carnitine@1.023-QP	L(-)-Carnitine	161.105	1.023	C7H15NO3	#N/A	Bile secretion;Other	QP
355	FALSE	161.94307@0.948-QP	#N/A	161.943	0.948	CH4Cl2N2OS	#N/A	#N/A	QP
356	FALSE	162.0263@2.394-QP	#N/A	162.026	2.394	C6H11OPS	#N/A	#N/A	QP
357	FALSE	162.02837@10.955-QP	#N/A	162.028	10.955	C5H2N6O	#N/A	#N/A	QP
358	FALSE	162.0284@15.903-QP	#N/A	162.028	15.903	C5H2N6O	#N/A	#N/A	QP
359	FALSE	4-hydroxycoumarin@9.679-QP	4-hydroxycoumarin	162.031	9.679	C9H6O3	#N/A	Biosynthesis of secondary metabolites;Phenylpropanoid biosynthesis;Biosynthesis of phenylpropanoids	QP
360	FALSE	4-(Trifluoromethyl)anilinium@1.389-QP	4-(Trifluoromethyl)anilinium	162.052	1.389	C7H7F3N	19022231	Metabolic pathways;Biosynthesis of secondary metabolites;Microbial metabolism in diverse environments;Other	QP
361	FALSE	4-(Trifluoromethyl)anilinium@1.114-QP	4-(Trifluoromethyl)anilinium	162.052	1.114	C7H7F3N	19022231	Metabolic pathways;Biosynthesis of secondary metabolites;Microbial metabolism in diverse environments;Other	QP
362	FALSE	Carbonyldiimidazole@1.411-QP	Carbonyldiimidazole	162.054	1.411	C7H6N4O	61561	#N/A	QP
363	FALSE	162.06722@12.353-QP	#N/A	162.067	12.353	#N/A	#N/A	#N/A	QP
364	FALSE	Phenidone@1.98-QP	Phenidone	162.079	1.98	C9H10N2O	6823	#N/A	QP
365	FALSE	2-benzylidenehydrazine-1-carboximidamide@9.247-QP	2-benzylidenehydrazine-1-carboximidamide	162.091	9.247	C8H10N4	7842757	#N/A	QP
366	FALSE	Acesulfame@2.358-QP	Acesulfame	162.993	2.358	C4H5NO4S	33607	#N/A	QP
367	FALSE	163.02153@0.99-QP	#N/A	163.022	0.99	C5H10NOPS	#N/A	#N/A	QP
368	FALSE	163.84561@1.07-QP	#N/A	163.846	1.07	#N/A	#N/A	#N/A	QP
369	FALSE	163.84651@0.964-QP	#N/A	163.847	0.964	#N/A	#N/A	#N/A	QP
370	FALSE	163.91259@1.13-QP	#N/A	163.913	1.13	#N/A	#N/A	#N/A	QP
371	FALSE	163.9127@0.888-QP	#N/A	163.913	0.888	#N/A	#N/A	#N/A	QP
372	FALSE	164.04642@12.357-QP	#N/A	164.046	12.357	C3H9N4O2P	#N/A	#N/A	QP
373	FALSE	2-Hydroxycinnamicacid@1.412-QP	2-Hydroxycinnamicacid	164.047	1.412	C9H8O3	#N/A	Metabolic pathways;Biosynthesis of secondary metabolites;Microbial metabolism in diverse environments;Biosynthesis of plant secondary metabolites;Degradation of aromatic compounds;Biosynthesis of amino acids;2-Oxocarboxylic acid metabolism;Phenylpropanoid biosynthesis;Biosynthesis of phenylpropanoids;Phenylalanine metabolism;Tropane, piperidine and pyridine alkaloid biosynthesis;Other	QP
374	FALSE	phenylheptatriyne@12.283-QP	phenylheptatriyne	164.062	12.283	C13H8	70367	#N/A	QP
375	FALSE	1,5-anhydroglucitol@1.065-QP	1,5-anhydroglucitol	164.068	1.065	C6H12O5	58485	Metabolic pathways;Microbial metabolism in diverse environments;ABC transporters;Other	QP
376	FALSE	4-Phenylbutyricacid@11.679-QP	4-Phenylbutyricacid	164.083	11.679	C10H12O2	#N/A	Metabolic pathways;Microbial metabolism in diverse environments;Degradation of aromatic compounds;Phenylpropanoid biosynthesis;Other	QP
377	FALSE	4-Propylbenzoicacid@1.426-QP	4-Propylbenzoicacid	164.083	1.426	C10H12O2	121262	Metabolic pathways;Microbial metabolism in diverse environments;Degradation of aromatic compounds;Phenylpropanoid biosynthesis;Other	QP
378	FALSE	2-methoxy-5-prop-1-enylphenol@13.95-QP	2-methoxy-5-prop-1-enylphenol	164.083	13.95	C10H12O2	#N/A	Metabolic pathways;Microbial metabolism in diverse environments;Degradation of aromatic compounds;Phenylpropanoid biosynthesis;Other	QP
379	FALSE	2-methoxy-5-prop-1-enylphenol@11.25-QP	2-methoxy-5-prop-1-enylphenol	164.083	11.25	C10H12O2	#N/A	Metabolic pathways;Microbial metabolism in diverse environments;Degradation of aromatic compounds;Phenylpropanoid biosynthesis;Other	QP
380	FALSE	2-Amino-6H-purine-6-thione@11.752-QP	2-Amino-6H-purine-6-thione	165.011	11.752	C5H3N5S	11318622	#N/A	QP
381	FALSE	2H-1,4-Benzothiazin-3(4H)-one@3.359-QP	2H-1,4-Benzothiazin-3(4H)-one	165.024	3.359	C8H7NOS	20108	#N/A	QP
382	FALSE	7-Methylguanine@2.573-QP	7-Methylguanine	165.065	2.573	C6H7N5O	#N/A	#N/A	QP
383	FALSE	165.06984@12.281-QP	#N/A	165.07	12.281	C9H12NP	#N/A	#N/A	QP
384	FALSE	L-Phenylalanine@1.831-QP	L-Phenylalanine	165.078	1.831	C9H11NO2	#N/A	Metabolic pathways;Biosynthesis of secondary metabolites;Biosynthesis of plant secondary metabolites;Biosynthesis of amino acids;Biosynthesis of alkaloids derived from shikimate pathway;2-Oxocarboxylic acid metabolism;ABC transporters;Phenylpropanoid biosynthesis;Biosynthesis of phenylpropanoids;Phenylalanine metabolism;Biosynthesis of alkaloids derived from ornithine, lysine and nicotinic acid;T…	QP
385	FALSE	L-Phenylalanine@9.975-QP	L-Phenylalanine	165.078	9.975	C9H11NO2	#N/A	Metabolic pathways;Biosynthesis of secondary metabolites;Biosynthesis of plant secondary metabolites;Biosynthesis of amino acids;Biosynthesis of alkaloids derived from shikimate pathway;2-Oxocarboxylic acid metabolism;ABC transporters;Phenylpropanoid biosynthesis;Biosynthesis of phenylpropanoids;Phenylalanine metabolism;Biosynthesis of alkaloids derived from ornithine, lysine and nicotinic acid;T…	QP
386	FALSE	L-Phenylalanine@1.372-QP	L-Phenylalanine	165.078	1.372	C9H11NO2	#N/A	Metabolic pathways;Biosynthesis of secondary metabolites;Biosynthesis of plant secondary metabolites;Biosynthesis of amino acids;Biosynthesis of alkaloids derived from shikimate pathway;2-Oxocarboxylic acid metabolism;ABC transporters;Phenylpropanoid biosynthesis;Biosynthesis of phenylpropanoids;Phenylalanine metabolism;Biosynthesis of alkaloids derived from ornithine, lysine and nicotinic acid;T…	QP
387	FALSE	4-hydroxypyridinyl-butanone@7.909-QP	4-hydroxypyridinyl-butanone	165.078	7.909	C9H11NO2	#N/A	Metabolic pathways;Biosynthesis of secondary metabolites;Biosynthesis of plant secondary metabolites;Biosynthesis of amino acids;Biosynthesis of alkaloids derived from shikimate pathway;2-Oxocarboxylic acid metabolism;ABC transporters;Phenylpropanoid biosynthesis;Biosynthesis of phenylpropanoids;Phenylalanine metabolism;Biosynthesis of alkaloids derived from ornithine, lysine and nicotinic acid;T…	QP
388	FALSE	4-hydroxypyridinyl-butanone@8.684-QP	4-hydroxypyridinyl-butanone	165.079	8.684	C9H11NO2	#N/A	Metabolic pathways;Biosynthesis of secondary metabolites;Biosynthesis of plant secondary metabolites;Biosynthesis of amino acids;Biosynthesis of alkaloids derived from shikimate pathway;2-Oxocarboxylic acid metabolism;ABC transporters;Phenylpropanoid biosynthesis;Biosynthesis of phenylpropanoids;Phenylalanine metabolism;Biosynthesis of alkaloids derived from ornithine, lysine and nicotinic acid;T…	QP
389	FALSE	4-hydroxypyridinyl-butanone@8.984-QP	4-hydroxypyridinyl-butanone	165.079	8.984	C9H11NO2	#N/A	Metabolic pathways;Biosynthesis of secondary metabolites;Biosynthesis of plant secondary metabolites;Biosynthesis of amino acids;Biosynthesis of alkaloids derived from shikimate pathway;2-Oxocarboxylic acid metabolism;ABC transporters;Phenylpropanoid biosynthesis;Biosynthesis of phenylpropanoids;Phenylalanine metabolism;Biosynthesis of alkaloids derived from ornithine, lysine and nicotinic acid;T…	QP
390	FALSE	165.84263@1.082-QP	#N/A	165.843	1.082	#N/A	#N/A	#N/A	QP
391	FALSE	165.84359@1.08-QP	#N/A	165.844	1.08	#N/A	#N/A	#N/A	QP
392	FALSE	166.04673@1.03-QP	#N/A	166.047	1.03	#N/A	#N/A	Metabolic pathways;Other	QP
393	FALSE	3-Methylxanthine@4.835-QP	3-Methylxanthine	166.048	4.835	C6H6N4O2	#N/A	Metabolic pathways;Biosynthesis of secondary metabolites;Microbial metabolism in diverse environments;Other	QP
394	FALSE	1-Methylxanthine@5.096-QP	1-Methylxanthine	166.048	5.096	C6H6N4O2	#N/A	Metabolic pathways;Biosynthesis of secondary metabolites;Microbial metabolism in diverse environments;Other	QP
395	FALSE	7-Methylxanthine@4.263-QP	7-Methylxanthine	166.049	4.263	C6H6N4O2	#N/A	Metabolic pathways;Biosynthesis of secondary metabolites;Microbial metabolism in diverse environments;Other	QP
396	FALSE	1-methylxanthine@1.473-QP	1-methylxanthine	166.049	1.473	C6H6N4O2	#N/A	Metabolic pathways;Biosynthesis of secondary metabolites;Microbial metabolism in diverse environments;Other	QP
397	FALSE	3-Phenyllacticacid@6.793-QP	3-Phenyllacticacid	166.062	6.793	C9H10O3	#N/A	Metabolic pathways;Biosynthesis of secondary metabolites;Microbial metabolism in diverse environments;Degradation of aromatic compounds;Phenylpropanoid biosynthesis;Phenylalanine metabolism;Biosynthesis of alkaloids derived from ornithine, lysine and nicotinic acid;Tropane, piperidine and pyridine alkaloid biosynthesis;Other	QP
398	FALSE	2-methoxy-2-phenylaceticacid@7.98-QP	2-methoxy-2-phenylaceticacid	166.062	7.98	C9H10O3	#N/A	Metabolic pathways;Biosynthesis of secondary metabolites;Microbial metabolism in diverse environments;Degradation of aromatic compounds;Phenylpropanoid biosynthesis;Phenylalanine metabolism;Biosynthesis of alkaloids derived from ornithine, lysine and nicotinic acid;Tropane, piperidine and pyridine alkaloid biosynthesis;Other	QP
399	FALSE	2-methoxy-2-phenylaceticacid@10.019-QP	2-methoxy-2-phenylaceticacid	166.062	10.019	C9H10O3	#N/A	Metabolic pathways;Biosynthesis of secondary metabolites;Microbial metabolism in diverse environments;Degradation of aromatic compounds;Phenylpropanoid biosynthesis;Phenylalanine metabolism;Biosynthesis of alkaloids derived from ornithine, lysine and nicotinic acid;Tropane, piperidine and pyridine alkaloid biosynthesis;Other	QP
400	FALSE	2-methoxy-2-phenylaceticacid@11.35-QP	2-methoxy-2-phenylaceticacid	166.062	11.35	C9H10O3	#N/A	Metabolic pathways;Biosynthesis of secondary metabolites;Microbial metabolism in diverse environments;Degradation of aromatic compounds;Phenylpropanoid biosynthesis;Phenylalanine metabolism;Biosynthesis of alkaloids derived from ornithine, lysine and nicotinic acid;Tropane, piperidine and pyridine alkaloid biosynthesis;Other	QP
401	FALSE	DC1025000@1.906-QP	DC1025000	166.082	1.906	C10H14S	67984	#N/A	QP
402	FALSE	166.09842@13.312-QP	#N/A	166.098	13.312	#N/A	#N/A	#N/A	QP
403	FALSE	6,8-Dioxo-6,7,8,9-tetrahydro-1H-purin-2-olate@1.415-QP	6,8-Dioxo-6,7,8,9-tetrahydro-1H-purin-2-olate	167.021	1.415	C5H3N4O3	306622	Metabolic pathways;Microbial metabolism in diverse environments;Biosynthesis of plant secondary metabolites;Biosynthesis of cofactors;Biosynthesis of alkaloids derived from ornithine, lysine and nicotinic acid;Other	QP
404	FALSE	167.83958@1.034-QP	#N/A	167.84	1.034	#N/A	#N/A	#N/A	QP
405	FALSE	Uricacid@1.668-QP	Uricacid	168.028	1.668	C5H4N4O3	#N/A	Metabolic pathways;Microbial metabolism in diverse environments;Bile secretion;Other	QP
406	FALSE	Uricacid@2.037-QP	Uricacid	168.028	2.037	C5H4N4O3	#N/A	Metabolic pathways;Microbial metabolism in diverse environments;Bile secretion;Other	QP
407	FALSE	1,2-dihydrophthalicacid@8.004-QP	1,2-dihydrophthalicacid	168.042	8.004	C8H8O4	81153	#N/A	QP
408	FALSE	1,2-dihydrophthalicacid@5.146-QP	1,2-dihydrophthalicacid	168.042	5.146	C8H8O4	81153	Metabolic pathways;Biosynthesis of secondary metabolites;Microbial metabolism in diverse environments;Biosynthesis of cofactors;Degradation of aromatic compounds;Phenylalanine metabolism;Other	QP
409	FALSE	1,2-dihydrophthalicacid@7.253-QP	1,2-dihydrophthalicacid	168.042	7.253	C8H8O4	81153	Metabolic pathways;Biosynthesis of secondary metabolites;Microbial metabolism in diverse environments;Biosynthesis of cofactors;Degradation of aromatic compounds;Phenylalanine metabolism;Other	QP
410	FALSE	168.05051@0.996-QP	#N/A	168.051	0.996	#N/A	#N/A	#N/A	QP
411	FALSE	DC2810000@9.799-QP	DC2810000	168.078	9.799	C9H12O3	21111723	Metabolic pathways;Other	QP
412	FALSE	168.08677@0.89-QP	#N/A	168.087	0.89	C4H8N8	#N/A	#N/A	QP
413	FALSE	Pyridoxamine@3.793-QP	Pyridoxamine	168.089	3.793	C8H12N2O2	#N/A	Metabolic pathways;Microbial metabolism in diverse environments;Other	QP
414	FALSE	168.11405@12.358-QP	#N/A	168.114	12.358	#N/A	#N/A	#N/A	QP
415	FALSE	1-hydroxy-2-oxolimonene@13.076-QP	1-hydroxy-2-oxolimonene	168.114	13.076	C10H16O2	#N/A	Metabolic pathways;Biosynthesis of secondary metabolites;Degradation of aromatic compounds;Other	QP
416	FALSE	1-hydroxy-2-oxolimonene@13.725-QP	1-hydroxy-2-oxolimonene	168.115	13.725	C10H16O2	#N/A	Metabolic pathways;Biosynthesis of secondary metabolites;Degradation of aromatic compounds;Other	QP
417	FALSE	168.97794@1.005-QP	#N/A	168.978	1.005	C3H8NOPS2	#N/A	#N/A	QP
418	FALSE	169.01163@1.668-QP	#N/A	169.012	1.668	C5H3N3O4	#N/A	#N/A	QP
419	FALSE	(2E)-2-(2-Furylmethylene)hydrazinecarbothioamide@1.737-QP	(2E)-2-(2-Furylmethylene)hydrazinecarbothioamide	169.031	1.737	C6H7N3OS	4941360	#N/A	QP
420	FALSE	169.03459@1.01-QP	#N/A	169.035	1.01	C4H14NP3	#N/A	#N/A	QP
421	FALSE	169.03659@2.986-QP	#N/A	169.037	2.986	#N/A	#N/A	#N/A	QP
422	FALSE	2-Nitro-6,7-dihydro-5H-imidazo[2,1-b][1,3]oxazine@9.729-QP	2-Nitro-6,7-dihydro-5H-imidazo[2,1-b][1,3]oxazine	169.049	9.729	C6H7N3O3	21865648	#N/A	QP
423	FALSE	DE3202000@2.955-QP	DE3202000	169.052	2.955	C11H7NO	60558	#N/A	QP
424	FALSE	6-hydroxydopamine@2.578-QP	6-hydroxydopamine	169.074	2.578	C8H11NO3	#N/A	Metabolic pathways;Microbial metabolism in diverse environments;Biosynthesis of cofactors;Other	QP
425	FALSE	1-methylhistidine@1.002-QP	1-methylhistidine	169.084	1.002	C7H11N3O2	#N/A	Metabolic pathways;Other	QP
426	FALSE	1-methylhistidine@1.13-QP	1-methylhistidine	169.085	1.13	C7H11N3O2	#N/A	Metabolic pathways;Other	QP
427	FALSE	Aceclidine@4.86-QP	Aceclidine	169.109	4.86	C9H15NO2	1902	#N/A	QP
428	FALSE	169.99631@4.568-QP	#N/A	169.996	4.568	C5H2N2O5	#N/A	#N/A	QP
429	FALSE	170.00058@4.361-QP	#N/A	170.001	4.361	C3H8ClN2O2P	#N/A	#N/A	QP
430	FALSE	170.07938@1.719-QP	#N/A	170.079	1.719	#N/A	#N/A	#N/A	QP
431	FALSE	N-isopropylammelide@2.284-QP	N-isopropylammelide	170.08	2.284	C6H10N4O2	#N/A	Metabolic pathways;Microbial metabolism in diverse environments;Other	QP
432	FALSE	Etiracetam@5.012-QP	Etiracetam	170.105	5.012	C8H14N2O2	53863	#N/A	QP
433	FALSE	Etiracetam@5.672-QP	Etiracetam	170.105	5.672	C8H14N2O2	53863	#N/A	QP
434	FALSE	170.12969@11.408-QP	#N/A	170.13	11.408	#N/A	#N/A	Metabolic pathways;Biosynthesis of secondary metabolites;Biosynthesis of alkaloids derived from shikimate pathway;Other	QP
435	FALSE	170.1298@14.741-QP	#N/A	170.13	14.741	#N/A	#N/A	Metabolic pathways;Biosynthesis of secondary metabolites;Biosynthesis of alkaloids derived from shikimate pathway;Other	QP
436	FALSE	171.03443@14.117-QP	#N/A	171.034	14.117	#N/A	#N/A	#N/A	QP
437	FALSE	171.04993@0.961-QP	#N/A	171.05	0.961	C3H5N7O2	#N/A	#N/A	QP
438	FALSE	Metronidazole@4.866-QP	Metronidazole	171.064	4.866	C6H9N3O3	4029	#N/A	QP
439	FALSE	127131@10.43-QP	127131	171.079	10.43	C10H9N3	13888	#N/A	QP
440	FALSE	4-(Methacryloylamino)butanoicacid@6.242-QP	4-(Methacryloylamino)butanoicacid	171.089	6.242	C8H13NO3	28639071	Other	QP
441	FALSE	Gabapentin@2.961-QP	Gabapentin	171.125	2.961	C9H17NO2	3328	#N/A	QP
442	FALSE	171.94826@12.545-QP	#N/A	171.948	12.545	C7H2Cl2O	#N/A	#N/A	QP
443	FALSE	172.02185@1.04-QP	#N/A	172.022	1.04	C6H9N2PS	#N/A	#N/A	QP
444	FALSE	(3,4-Difluorophenyl)aceticacid@1.003-QP	(3,4-Difluorophenyl)aceticacid	172.034	1.003	C8H6F2O2	62775	#N/A	QP
445	FALSE	2,6-Dioxohexahydro-4-pyrimidinecarbohydrazide@1.358-QP	2,6-Dioxohexahydro-4-pyrimidinecarbohydrazide	172.059	1.358	C5H8N4O3	205890	#N/A	QP
446	FALSE	naphthalen-1-ethanol@20.029-QP	naphthalen-1-ethanol	172.088	20.029	C12H12O	12505	#N/A	QP
447	FALSE	Decanoicacid@12.179-QP	Decanoicacid	172.145	12.179	C10H20O2	2863	#N/A	QP
448	FALSE	Decanoicacid@15.654-QP	Decanoicacid	172.145	15.654	C10H20O2	2863	#N/A	QP
449	FALSE	Hexanoylglycine@1.105-QP	Hexanoylglycine	173.105	1.105	C8H15NO3	#N/A	#N/A	QP
450	FALSE	Hexanoylglycine@2.069-QP	Hexanoylglycine	173.105	2.069	C8H15NO3	#N/A	Biosynthesis of alkaloids derived from ornithine, lysine and nicotinic acid;Tropane, piperidine and pyridine alkaloid biosynthesis	QP
451	FALSE	N5-(1-Iminoethyl)-L-ornithine@1.766-QP	N5-(1-Iminoethyl)-L-ornithine	173.116	1.766	C7H15N3O2	97098	#N/A	QP
452	FALSE	4-Phenolsulfonicacid@3.263-QP	4-Phenolsulfonicacid	173.998	3.263	C6H6O4S	#N/A	#N/A	QP
453	FALSE	174.02627@3.038-QP	#N/A	174.026	3.038	C7H11OPS	#N/A	#N/A	QP
454	FALSE	174.02637@2.684-QP	#N/A	174.026	2.684	C7H11OPS	#N/A	#N/A	QP
455	FALSE	1,3,5-Trinitroso-1,3,5-triazinane@1.004-QP	1,3,5-Trinitroso-1,3,5-triazinane	174.05	1.004	C3H6N6O3	24566	#N/A	QP
456	FALSE	N-Acetylornithine@1.168-QP	N-Acetylornithine	174.1	1.168	C7H14N2O3	#N/A	Metabolic pathways;Biosynthesis of secondary metabolites;Biosynthesis of amino acids;2-Oxocarboxylic acid metabolism;Other	QP
457	FALSE	DL-Arginine@1-QP	DL-Arginine	174.111	1	C6H14N4O2	227	Metabolic pathways;Biosynthesis of secondary metabolites;Biosynthesis of plant secondary metabolites;Biosynthesis of amino acids;ABC transporters;Biosynthesis of alkaloids derived from ornithine, lysine and nicotinic acid;Other	QP
458	FALSE	DL-Arginine@1.376-QP	DL-Arginine	174.111	1.376	C6H14N4O2	227	Metabolic pathways;Biosynthesis of secondary metabolites;Biosynthesis of plant secondary metabolites;Biosynthesis of amino acids;ABC transporters;Biosynthesis of alkaloids derived from ornithine, lysine and nicotinic acid;Other	QP
459	FALSE	DL-Arginine@1.136-QP	DL-Arginine	174.111	1.136	C6H14N4O2	227	Metabolic pathways;Biosynthesis of secondary metabolites;Biosynthesis of plant secondary metabolites;Biosynthesis of amino acids;ABC transporters;Biosynthesis of alkaloids derived from ornithine, lysine and nicotinic acid;Other	QP
460	FALSE	174.99288@1.631-QP	#N/A	174.993	1.631	C7H2N3OP	#N/A	#N/A	QP
461	FALSE	175.03284@1.059-QP	#N/A	175.033	1.059	C5H10N3PS	#N/A	#N/A	QP
462	FALSE	Indole-3-aceticacid@9.3-QP	Indole-3-aceticacid	175.063	9.3	C10H9NO2	780	Metabolic pathways;Other	QP
463	FALSE	2,5,5-Trimethyl-4-thiazolidinecarboxylicacid@2.756-QP	2,5,5-Trimethyl-4-thiazolidinecarboxylicacid	175.066	2.756	C7H13NO2S	164957	#N/A	QP
464	FALSE	175.09445@1.025-QP	#N/A	175.094	1.025	#N/A	#N/A	#N/A	QP
465	FALSE	Citrulline@1.014-QP	Citrulline	175.095	1.014	C6H13N3O3	#N/A	Metabolic pathways;Biosynthesis of secondary metabolites;Biosynthesis of amino acids;Other	QP
466	FALSE	2-Ethylhexylnitrate@1.148-QP	2-Ethylhexylnitrate	175.12	1.148	C8H17NO3	56557	#N/A	QP
467	FALSE	175.9374@0.935-QP	#N/A	175.937	0.935	#N/A	#N/A	#N/A	QP
468	FALSE	175.93803@0.932-QP	#N/A	175.938	0.932	C3H7Cl2PS	#N/A	#N/A	QP
469	FALSE	176.0168@0.995-QP	#N/A	176.017	0.995	C5H9N2OPS	#N/A	#N/A	QP
470	FALSE	Erythorbicacid@3.263-QP	Erythorbicacid	176.031	3.263	C6H8O6	10437567	Metabolic pathways;Biosynthesis of secondary metabolites;Microbial metabolism in diverse environments;Biosynthesis of cofactors;Other	QP
471	FALSE	2-hydroxy-3-oxoadipicacid@1.337-QP	2-hydroxy-3-oxoadipicacid	176.031	1.337	C6H8O6	8776504	#N/A	QP
472	FALSE	4-methylumbelliferone@7.551-QP	4-methylumbelliferone	176.047	7.551	C10H8O3	#N/A	#N/A	QP
473	FALSE	4-methylumbelliferone@7.948-QP	4-methylumbelliferone	176.047	7.948	C10H8O3	#N/A	#N/A	QP
474	FALSE	176.05312@0.893-QP	#N/A	176.053	0.893	C6H13N2PS	#N/A	#N/A	QP
475	FALSE	176.05761@9.902-QP	#N/A	176.058	9.902	#N/A	#N/A	#N/A	QP
476	FALSE	EDDA@1.015-QP	EDDA	176.079	1.015	C6H12N2O4	55826	Other	QP
477	FALSE	EDDA@9.768-QP	EDDA	176.079	9.768	C6H12N2O4	55826	Other	QP
478	FALSE	Cotinine@3.597-QP	Cotinine	176.094	3.597	C10H12N2O	#N/A	Metabolic pathways;Biosynthesis of secondary metabolites;Microbial metabolism in diverse environments;Biosynthesis of alkaloids derived from shikimate pathway;Bile secretion;Other	QP
479	FALSE	176.10376@8.811-QP	#N/A	176.104	8.811	#N/A	#N/A	#N/A	QP
480	FALSE	176.99721@10.893-QP	#N/A	176.997	10.893	C3H5ClN5P	#N/A	#N/A	QP
481	FALSE	176.99721@13.668-QP	#N/A	176.997	13.668	C3H5ClN5P	#N/A	#N/A	QP
482	FALSE	2-Chloro-1-(4-methyl-1,3-thiazol-5-yl)ethanol@1.003-QP	2-Chloro-1-(4-methyl-1,3-thiazol-5-yl)ethanol	177.001	1.003	C6H8ClNOS	505665	#N/A	QP
483	FALSE	177.01583@0.972-QP	#N/A	177.016	0.972	C2H4ClN7O	#N/A	#N/A	QP
484	FALSE	177.0511@0.957-QP	#N/A	177.051	0.957	C4H3N9	#N/A	#N/A	QP
485	FALSE	177.06947@14.766-QP	#N/A	177.069	14.766	#N/A	#N/A	#N/A	QP
486	FALSE	Tetrahydroisoquinoline-3-carboxylicacid@1.736-QP	Tetrahydroisoquinoline-3-carboxylicacid	177.078	1.736	C10H11NO2	86184	#N/A	QP
487	FALSE	Tetrahydroisoquinoline-3-carboxylicacid@1.497-QP	Tetrahydroisoquinoline-3-carboxylicacid	177.079	1.497	C10H11NO2	86184	#N/A	QP
488	FALSE	177.90705@0.908-QP	#N/A	177.907	0.908	CH4ClO2PS2	#N/A	#N/A	QP
489	FALSE	177.99089@1.477-QP	#N/A	177.991	1.477	CH2N6O3S	#N/A	#N/A	QP
490	FALSE	177.99696@1.093-QP	#N/A	177.997	1.093	C4H7N2O2PS	#N/A	#N/A	QP
491	FALSE	6,7-dihydroxycoumarin@13.062-QP	6,7-dihydroxycoumarin	178.026	13.062	C9H6O4	#N/A	Biosynthesis of phenylpropanoids	QP
492	FALSE	UF7990000@1.816-QP	UF7990000	178.029	1.816	C6H10O4S	7805	#N/A	QP
493	FALSE	7-Chloro-4-quinolinamine@7.199-QP	7-Chloro-4-quinolinamine	178.03	7.199	C9H7ClN2	85459	#N/A	QP
494	FALSE	1-keto-inositol@1.027-QP	1-keto-inositol	178.047	1.027	C6H10O6	#N/A	Metabolic pathways;Biosynthesis of secondary metabolites;Microbial metabolism in diverse environments;Biosynthesis of cofactors;Other	QP
495	FALSE	1,2-dihydroxy-3,4-epoxytetrahydronaphthalene@12.36-QP	1,2-dihydroxy-3,4-epoxytetrahydronaphthalene	178.062	12.36	C10H10O3	#N/A	Metabolic pathways;Biosynthesis of secondary metabolites;2-Oxocarboxylic acid metabolism;Phenylpropanoid biosynthesis;Biosynthesis of phenylpropanoids;Other	QP
496	FALSE	4-Methoxycinnamicacid@8.959-QP	4-Methoxycinnamicacid	178.062	8.959	C10H10O3	12689	Metabolic pathways;Biosynthesis of secondary metabolites;2-Oxocarboxylic acid metabolism;Phenylpropanoid biosynthesis;Biosynthesis of phenylpropanoids;Other	QP
497	FALSE	1-Chloro-3,7-diaminoheptan-2-one@10.754-QP	1-Chloro-3,7-diaminoheptan-2-one	178.087	10.754	C7H15ClN2O	4471864	#N/A	QP
498	FALSE	178.09816@12.352-QP	#N/A	178.098	12.352	C5H15N4OP	#N/A	#N/A	QP
499	FALSE	Hippuricacid@5.727-QP	Hippuricacid	179.058	5.727	C9H9NO3	451	#N/A	QP
500	FALSE	Cyclohexylsulfamicacid@3.054-QP	Cyclohexylsulfamicacid	179.061	3.054	C6H13NO3S	#N/A	Microbial metabolism in diverse environments;Other	QP
501	FALSE	179.07252@14.767-QP	#N/A	179.073	14.767	#N/A	#N/A	#N/A	QP
502	FALSE	Acridine@8.968-QP	Acridine	179.073	8.968	C13H9N	8860	#N/A	QP
503	FALSE	Acridine@10.388-QP	Acridine	179.073	10.388	C13H9N	8860	#N/A	QP
504	FALSE	7-aminomethyl-7-carbaguanine@5.952-QP	7-aminomethyl-7-carbaguanine	179.08	5.952	C7H9N5O	#N/A	Metabolic pathways;Other	QP
505	FALSE	KL1320000@5.257-QP	KL1320000	179.131	5.257	C11H17NO	6800	#N/A	QP
506	FALSE	179.92652@1.273-QP	#N/A	179.927	1.273	#N/A	#N/A	#N/A	QP
507	FALSE	180.0004@1.036-QP	#N/A	180	1.036	C5H9O3PS	#N/A	#N/A	QP
508	FALSE	Isonicotinylglycine@5.486-QP	Isonicotinylglycine	180.053	5.486	C8H8N2O3	141130	Other	QP
509	FALSE	9-fluorenone@12.656-QP	9-fluorenone	180.057	12.656	C13H8O	#N/A	Metabolic pathways;Microbial metabolism in diverse environments;Other	QP
510	FALSE	9-fluorenone@14.366-QP	9-fluorenone	180.058	14.366	C13H8O	#N/A	Metabolic pathways;Microbial metabolism in diverse environments;Other	QP
511	FALSE	D-(-)-Fructose@1.02-QP	D-(-)-Fructose	180.062	1.02	C6H12O6	#N/A	#N/A	QP
512	FALSE	D-(-)-Fructose@1.165-QP	D-(-)-Fructose	180.063	1.165	C6H12O6	#N/A	Metabolic pathways;Biosynthesis of secondary metabolites;Microbial metabolism in diverse environments;Biosynthesis of plant secondary metabolites;Biosynthesis of cofactors;Biosynthesis of alkaloids derived from shikimate pathway;ABC transporters;Bile secretion;Biosynthesis of phenylpropanoids;Biosynthesis of alkaloids derived from ornithine, lysine and nicotinic acid;Other	QP
513	FALSE	Paraxanthine@1.454-QP	Paraxanthine	180.064	1.454	C7H8N4O2	4525	Metabolic pathways;Biosynthesis of secondary metabolites;Microbial metabolism in diverse environments;Biosynthesis of plant secondary metabolites;Biosynthesis of cofactors;Biosynthesis of alkaloids derived from shikimate pathway;ABC transporters;Bile secretion;Biosynthesis of phenylpropanoids;Biosynthesis of alkaloids derived from ornithine, lysine and nicotinic acid;Other	QP
514	FALSE	Theobromine@6.434-QP	Theobromine	180.064	6.434	C7H8N4O2	5236	Metabolic pathways;Biosynthesis of secondary metabolites;Microbial metabolism in diverse environments;Biosynthesis of plant secondary metabolites;Other	QP
515	FALSE	Theophylline@6.769-QP	Theophylline	180.064	6.769	C7H8N4O2	2068	Metabolic pathways;Biosynthesis of secondary metabolites;Microbial metabolism in diverse environments;Biosynthesis of plant secondary metabolites;Other	QP
516	FALSE	2-hydroxyiminomethyl-4-carbamoyl-1-methylpyridinium@8.551-QP	2-hydroxyiminomethyl-4-carbamoyl-1-methylpyridinium	180.078	8.551	C8H10N3O2	21374700	Metabolic pathways;Biosynthesis of secondary metabolites;Phenylpropanoid biosynthesis;Biosynthesis of phenylpropanoids;Other	QP
517	FALSE	5,8-dihydroxy-10-methyl-5,8,9,10-tetrahydro-2H-oxecin-2-one@12.351-QP	5,8-dihydroxy-10-methyl-5,8,9,10-tetrahydro-2H-oxecin-2-one	180.078	12.351	C10H14O4	#N/A	Metabolic pathways;Biosynthesis of secondary metabolites;Phenylpropanoid biosynthesis;Biosynthesis of phenylpropanoids;Other	QP
518	FALSE	Coniferylalcohol@9.043-QP	Coniferylalcohol	180.078	9.043	C10H12O3	#N/A	Metabolic pathways;Biosynthesis of secondary metabolites;Phenylpropanoid biosynthesis;Biosynthesis of phenylpropanoids;Other	QP
519	FALSE	Coniferylalcohol@10.765-QP	Coniferylalcohol	180.078	10.765	C10H12O3	#N/A	Metabolic pathways;Biosynthesis of secondary metabolites;Phenylpropanoid biosynthesis;Biosynthesis of phenylpropanoids;Other	QP
520	FALSE	180.15037@14.303-QP	#N/A	180.15	14.303	#N/A	#N/A	#N/A	QP
521	FALSE	181.00517@9.523-QP	#N/A	181.005	9.523	C5H9ClNO2P	#N/A	#N/A	QP
522	FALSE	(Phenylsulfonyl)acetonitrile@3.36-QP	(Phenylsulfonyl)acetonitrile	181.019	3.36	C8H7NO2S	74075	#N/A	QP
523	FALSE	(Phenylsulfonyl)acetonitrile@7.597-QP	(Phenylsulfonyl)acetonitrile	181.019	7.597	C8H7NO2S	74075	#N/A	QP
524	FALSE	181.03642@6.948-QP	#N/A	181.036	6.948	C2H8N5O3P	#N/A	#N/A	QP
525	FALSE	1H-indene-3-carboxamide@1.147-QP	1H-indene-3-carboxamide	181.05	1.147	C10H9NO	#N/A	Biosynthesis of secondary metabolites;Other	QP
526	FALSE	4,6-Dimethyl-3H-1,2,3-triazolo[4,5-d]pyrimidine-5,7(4H,6H)-dione@4.428-QP	4,6-Dimethyl-3H-1,2,3-triazolo[4,5-d]pyrimidine-5,7(4H,6H)-dione	181.06	4.428	C6H7N5O2	86521	Other	QP
527	FALSE	N-(4-Methylphenyl)hydrazinecarbothioamide@6.431-QP	N-(4-Methylphenyl)hydrazinecarbothioamide	181.067	6.431	C8H11N3S	644197	#N/A	QP
528	FALSE	N-(4-Methylphenyl)hydrazinecarbothioamide@6.73-QP	N-(4-Methylphenyl)hydrazinecarbothioamide	181.067	6.73	C8H11N3S	644197	#N/A	QP
529	FALSE	181.07098@1.036-QP	#N/A	181.071	1.036	C5H7N7O	#N/A	#N/A	QP
530	FALSE	L-Tyrosine@1.41-QP	L-Tyrosine	181.073	1.41	C9H11NO3	#N/A	Metabolic pathways;Biosynthesis of secondary metabolites;Biosynthesis of plant secondary metabolites;Biosynthesis of cofactors;Biosynthesis of amino acids;Biosynthesis of alkaloids derived from shikimate pathway;2-Oxocarboxylic acid metabolism;Phenylpropanoid biosynthesis;Phenylalanine metabolism;Glucosinolate biosynthesis;Other	QP
531	FALSE	Beta-tyrosine@5.691-QP	Beta-tyrosine	181.073	5.691	C9H11NO3	#N/A	Metabolic pathways;Biosynthesis of secondary metabolites;Biosynthesis of plant secondary metabolites;Biosynthesis of cofactors;Biosynthesis of amino acids;Biosynthesis of alkaloids derived from shikimate pathway;2-Oxocarboxylic acid metabolism;Phenylpropanoid biosynthesis;Phenylalanine metabolism;Glucosinolate biosynthesis;Other	QP
532	FALSE	Beta-tyrosine@6.13-QP	Beta-tyrosine	181.074	6.13	C9H11NO3	#N/A	Metabolic pathways;Biosynthesis of secondary metabolites;Biosynthesis of plant secondary metabolites;Biosynthesis of cofactors;Biosynthesis of amino acids;Biosynthesis of alkaloids derived from shikimate pathway;2-Oxocarboxylic acid metabolism;Phenylpropanoid biosynthesis;Phenylalanine metabolism;Glucosinolate biosynthesis;Other	QP
533	FALSE	4-amino-3-(2-furyl)-5-mercapto-1,2,4-triazole@7.184-QP	4-amino-3-(2-furyl)-5-mercapto-1,2,4-triazole	182.027	7.184	C6H6N4OS	573726	#N/A	QP
534	FALSE	1-Methyluricacid@3.036-QP	1-Methyluricacid	182.043	3.036	C6H6N4O3	#N/A	Other	QP
535	FALSE	1-Methyluricacid@3.466-QP	1-Methyluricacid	182.043	3.466	C6H6N4O3	#N/A	Other	QP
536	FALSE	DL-4-Hydroxyphenyllacticacid@4.138-QP	DL-4-Hydroxyphenyllacticacid	182.057	4.138	C9H10O4	#N/A	Metabolic pathways;Biosynthesis of secondary metabolites;Microbial metabolism in diverse environments;Degradation of aromatic compounds;Phenylalanine metabolism;Other	QP
537	FALSE	3,4-dimethoxybenzoicacid@9.122-QP	3,4-dimethoxybenzoicacid	182.058	9.122	C9H10O4	#N/A	Metabolic pathways;Biosynthesis of secondary metabolites;Microbial metabolism in diverse environments;Degradation of aromatic compounds;Phenylalanine metabolism;Other	QP
538	FALSE	182.07803@1.053-QP	#N/A	182.078	1.053	C3H6N10	#N/A	#N/A	QP
539	FALSE	182.07811@0.981-QP	#N/A	182.078	0.981	#N/A	#N/A	#N/A	QP
540	FALSE	Iridotrial@11.351-QP	Iridotrial	182.093	11.351	C10H14O3	14883678	Metabolic pathways;Biosynthesis of secondary metabolites;Other	QP
541	FALSE	182.97237@1.009-QP	#N/A	182.972	1.009	C7H2ClNO3	#N/A	#N/A	QP
542	FALSE	Saccharin@4.393-QP	Saccharin	182.998	4.393	C7H5NO3S	4959	#N/A	QP
543	FALSE	4,4-Difluoroglutamicacid@3.367-QP	4,4-Difluoroglutamicacid	183.034	3.367	C5H7F2NO4	2018627	#N/A	QP
544	FALSE	p-hydroxyphenylacetothiohydroximicacid@6.991-QP	p-hydroxyphenylacetothiohydroximicacid	183.035	6.991	C8H9NO2S	#N/A	#N/A	QP
545	FALSE	3,5-dihydroxyphenylglycine@2.738-QP	3,5-dihydroxyphenylglycine	183.053	2.738	C8H9NO4	#N/A	Metabolic pathways;Biosynthesis of secondary metabolites;Microbial metabolism in diverse environments;Other	QP
546	FALSE	Phosphocholine@16.729-QP	Phosphocholine	183.065	16.729	C5H14NO4P	119298	Microbial metabolism in diverse environments;Other	QP
547	FALSE	Acetyltropine@1.383-QP	Acetyltropine	183.125	1.383	C10H17NO2	#N/A	Tropane, piperidine and pyridine alkaloid biosynthesis	QP
548	FALSE	SM6680000@4.66-QP	SM6680000	183.995	4.66	C6HF5O	12499	#N/A	QP
549	FALSE	184.0031@1.393-QP	#N/A	184.003	1.393	C6H5N2O3P	#N/A	#N/A	QP
550	FALSE	184.02184@1.703-QP	#N/A	184.022	1.703	C7H9N2PS	#N/A	#N/A	QP
551	FALSE	5-hydroxyisouricacid@1.703-QP	5-hydroxyisouricacid	184.022	1.703	C5H4N4O4	219288	Metabolic pathways;Microbial metabolism in diverse environments;Other	QP
552	FALSE	184.02423@0.978-QP	#N/A	184.024	0.978	C3H9N2O5P	#N/A	Metabolic pathways;Microbial metabolism in diverse environments;Other	QP
553	FALSE	YQ8780000@1.449-QP	YQ8780000	184.059	1.449	C6H8N4O3	73199	#N/A	QP
554	FALSE	Phosphocholineconjugateacid@9.726-QP	Phosphocholineconjugateacid	184.073	9.726	C5H15NO4P	989	Metabolic pathways;Microbial metabolism in diverse environments;Degradation of aromatic compounds;Phenylalanine metabolism;Other	QP
555	FALSE	Veronal@2.029-QP	Veronal	184.084	2.029	C8H12N2O3	2206	#N/A	QP
556	FALSE	184.09507@1.399-QP	#N/A	184.095	1.399	#N/A	#N/A	#N/A	QP
557	FALSE	184.10879@10.449-QP	#N/A	184.109	10.449	#N/A	#N/A	Metabolic pathways;Biosynthesis of secondary metabolites;Degradation of aromatic compounds;Other	QP
558	FALSE	N-(3-acetamidopropyl)pyrrolidin-2-one@6.03-QP	N-(3-acetamidopropyl)pyrrolidin-2-one	184.121	6.03	C9H16N2O2	114601	#N/A	QP
559	FALSE	184.14532@13.198-QP	#N/A	184.145	13.198	#N/A	#N/A	#N/A	QP
560	FALSE	184.14535@15.595-QP	#N/A	184.145	15.595	#N/A	#N/A	#N/A	QP
561	FALSE	185.10411@7.221-QP	#N/A	185.104	7.221	#N/A	#N/A	#N/A	QP
562	FALSE	Ecgonine@2.592-QP	Ecgonine	185.104	2.592	C9H15NO3	#N/A	Tropane, piperidine and pyridine alkaloid biosynthesis	QP
563	FALSE	Ecgonine@1.244-QP	Ecgonine	185.105	1.244	C9H15NO3	#N/A	Tropane, piperidine and pyridine alkaloid biosynthesis	QP
564	FALSE	185.9874@0.893-QP	#N/A	185.987	0.893	#N/A	#N/A	#N/A	QP
565	FALSE	[Hydroxy(phenyl)methyl]phosphonate@10.334-QP	[Hydroxy(phenyl)methyl]phosphonate	186.007	10.334	C7H7O4P	19980638	#N/A	QP
566	FALSE	186.02844@1.036-QP	#N/A	186.028	1.036	C7H2N6O	#N/A	#N/A	QP
567	FALSE	186.04965@1.561-QP	#N/A	186.05	1.561	C4H6N6O3	#N/A	#N/A	QP
568	FALSE	186.04984@1.088-QP	#N/A	186.05	1.088	C4H6N6O3	#N/A	#N/A	QP
569	FALSE	PYR-GLY-OH@1.406-QP	PYR-GLY-OH	186.063	1.406	C7H10N2O4	134831	#N/A	QP
570	FALSE	2-carboxycyclohexylaceticacid@8.474-QP	2-carboxycyclohexylaceticacid	186.088	8.474	C9H14O4	#N/A	Microbial metabolism in diverse environments;Other	QP
571	FALSE	(3S)-3-[(2S)-2-Amino-4-hydroxy-3-oxobutyl]-2-pyrrolidinone@2.571-QP	(3S)-3-[(2S)-2-Amino-4-hydroxy-3-oxobutyl]-2-pyrrolidinone	186.1	2.571	C8H14N2O3	21865415	#N/A	QP
572	FALSE	10-HDA@12.539-QP	10-HDA	186.125	12.539	C10H18O3	#N/A	Degradation of aromatic compounds;Other	QP
573	FALSE	187.00018@1.386-QP	#N/A	187	1.386	C3H10ClN3S2	#N/A	#N/A	QP
574	FALSE	3-(2,4-Dioxo-1-imidazolidinyl)alanine@2.667-QP	3-(2,4-Dioxo-1-imidazolidinyl)alanine	187.059	2.667	C6H9N3O4	2299821	#N/A	QP
575	FALSE	187.06021@1.831-QP	#N/A	187.06	1.831	C7H5N7	#N/A	#N/A	QP
576	FALSE	Indole-3-acrylicacid@9.229-QP	Indole-3-acrylicacid	187.063	9.229	C11H9NO2	#N/A	Microbial metabolism in diverse environments;Other	QP
577	FALSE	Indole-3-acrylicacid@2.955-QP	Indole-3-acrylicacid	187.063	2.955	C11H9NO2	#N/A	Microbial metabolism in diverse environments;Other	QP
578	FALSE	Indole-3-acrylicacid@5.868-QP	Indole-3-acrylicacid	187.063	5.868	C11H9NO2	#N/A	Microbial metabolism in diverse environments;Other	QP
579	FALSE	Indole-3-acrylicacid@10.756-QP	Indole-3-acrylicacid	187.063	10.756	C11H9NO2	#N/A	Microbial metabolism in diverse environments;Other	QP
580	FALSE	Amrinone@9.491-QP	Amrinone	187.074	9.491	C10H9N3O	3570	#N/A	QP
581	FALSE	Amino-oxononanoate@1.101-QP	Amino-oxononanoate	187.12	1.101	C9H17NO3	#N/A	Metabolic pathways;Biosynthesis of cofactors;Other	QP
582	FALSE	N1-acetylspermidine@1.021-QP	N1-acetylspermidine	187.168	1.021	C9H21N3O	#N/A	#N/A	QP
583	FALSE	CSgas@6.83-QP	CSgas	188.013	6.83	C10H5ClN2	16644	#N/A	QP
584	FALSE	2-Phenyl-2H-1,2,3-triazole-4-carboxylate@12.921-QP	2-Phenyl-2H-1,2,3-triazole-4-carboxylate	188.046	12.921	C9H6N3O2	3500174	#N/A	QP
585	FALSE	1-hydroxy-2-naphthoicacid@12.215-QP	1-hydroxy-2-naphthoicacid	188.047	12.215	C11H8O3	#N/A	Metabolic pathways;Microbial metabolism in diverse environments;Degradation of aromatic compounds;Other	QP
586	FALSE	6-Fluorobicyclo[3.1.0]hexane-2,6-dicarboxylicacid@1.222-QP	6-Fluorobicyclo[3.1.0]hexane-2,6-dicarboxylicacid	188.048	1.222	C8H9FO4	34448916	#N/A	QP
587	FALSE	188.06538@1.172-QP	#N/A	188.065	1.172	C4H8N6O3	#N/A	#N/A	QP
588	FALSE	Azelicacid@7.747-QP	Azelicacid	188.104	7.747	C9H16O4	#N/A	#N/A	QP
589	FALSE	Tilarginine@1.007-QP	Tilarginine	188.127	1.007	C7H16N4O2	4213	#N/A	QP
590	FALSE	2055675@13.457-QP	2055675	188.14	13.457	C14D10	72532	#N/A	QP
591	FALSE	3-Hydroxydecanoicacid@12.65-QP	3-Hydroxydecanoicacid	188.14	12.65	C10H20O3	#N/A	#N/A	QP
592	FALSE	7,8-diaminononanoicacid@0.999-QP	7,8-diaminononanoicacid	188.152	0.999	C9H20N2O2	#N/A	Metabolic pathways;Biosynthesis of cofactors;Other	QP
593	FALSE	189.00861@1.745-QP	#N/A	189.009	1.745	C8H4N3OP	#N/A	#N/A	QP
594	FALSE	3-trifluoromethylbenzoate@6.8-QP	3-trifluoromethylbenzoate	189.017	6.8	C8H4F3O2	10577182	#N/A	QP
595	FALSE	N-acetylisatin@6.664-QP	N-acetylisatin	189.042	6.664	C10H7NO3	#N/A	Metabolic pathways;Other	QP
596	FALSE	Tris(acetato-kappaO)(hydrido)borate(1-)@14.766-QP	Tris(acetato-kappaO)(hydrido)borate(1-)	189.057	14.766	C6H10BO6	9660403	#N/A	QP
597	FALSE	2-methylindole-3-aceticacid@9.645-QP	2-methylindole-3-aceticacid	189.078	9.645	C11H11NO2	#N/A	#N/A	QP
598	FALSE	2-methylindole-3-aceticacid@10.735-QP	2-methylindole-3-aceticacid	189.078	10.735	C11H11NO2	#N/A	#N/A	QP
599	FALSE	5-Methyl-N-(pyridin-3-ylmethyl)isoxazol-3-amine@9.49-QP	5-Methyl-N-(pyridin-3-ylmethyl)isoxazol-3-amine	189.089	9.49	C10H11N3O	#N/A	#N/A	QP
600	FALSE	MFCD01632691@7.54-QP	MFCD01632691	189.09	7.54	C10H11N3O	460478	#N/A	QP
601	FALSE	Homocitrulline@1.362-QP	Homocitrulline	189.111	1.362	C7H15N3O3	58582	#N/A	QP
602	FALSE	2,4-dichlorobenzoicacid@10.79-QP	2,4-dichlorobenzoicacid	189.958	10.79	C7H4Cl2O2	#N/A	Metabolic pathways;Microbial metabolism in diverse environments;Other	QP
603	FALSE	3,4-Dihydroxybenzenesulfonicacid@2.851-QP	3,4-Dihydroxybenzenesulfonicacid	189.993	2.851	C6H6O5S	#N/A	Microbial metabolism in diverse environments;Other	QP
604	FALSE	190.00901@6.82-QP	#N/A	190.009	6.82	C10H6O2S	#N/A	#N/A	QP
605	FALSE	190.01637@6.786-QP	#N/A	190.016	6.786	C6H3N6P	#N/A	#N/A	QP
606	FALSE	190.03239@0.997-QP	#N/A	190.032	0.997	C6H11N2OPS	#N/A	#N/A	QP
607	FALSE	2,4-dihydroxyheptenedioicacid@1.449-QP	2,4-dihydroxyheptenedioicacid	190.047	1.449	C7H10O6	#N/A	Metabolic pathways;Biosynthesis of secondary metabolites;Microbial metabolism in diverse environments;Biosynthesis of amino acids;Other	QP
608	FALSE	1,2-dihydroxy-7-hydroxymethylnaphthalene@10.608-QP	1,2-dihydroxy-7-hydroxymethylnaphthalene	190.062	10.608	C11H10O3	#N/A	Microbial metabolism in diverse environments;Other	QP
609	FALSE	1,2-dihydroxy-7-hydroxymethylnaphthalene@12.033-QP	1,2-dihydroxy-7-hydroxymethylnaphthalene	190.063	12.033	C11H10O3	#N/A	Microbial metabolism in diverse environments;Other	QP
610	FALSE	190.06877@0.914-QP	#N/A	190.069	0.914	C7H15N2PS	#N/A	#N/A	QP
611	FALSE	190.09836@14.476-QP	#N/A	190.098	14.476	#N/A	#N/A	#N/A	QP
612	FALSE	190.99554@2.837-QP	#N/A	190.996	2.837	C9H6NPS	#N/A	#N/A	QP
613	FALSE	191.01635@1.007-QP	#N/A	191.016	1.007	C6H10NO2PS	#N/A	#N/A	QP
614	FALSE	6-formylpterin@7.58-QP	6-formylpterin	191.043	7.58	C7H5N5O2	132953	#N/A	QP
615	FALSE	5-hydroxyindoleaceticacid@2.018-QP	5-hydroxyindoleaceticacid	191.058	2.018	C10H9NO3	#N/A	Metabolic pathways;Drug metabolism - cytochrome P450;Other	QP
616	FALSE	5-hydroxyindoleaceticacid@6.268-QP	5-hydroxyindoleaceticacid	191.058	6.268	C10H9NO3	#N/A	Metabolic pathways;Drug metabolism - cytochrome P450;Other	QP
617	FALSE	6844478@11.735-QP	6844478	191.073	11.735	C6H13N3O2S	2015302	#N/A	QP
618	FALSE	3,6-Dideoxy-3-(dimethylamino)hexopyranose@1.048-QP	3,6-Dideoxy-3-(dimethylamino)hexopyranose	191.115	1.048	C8H17NO4	305697	#N/A	QP
619	FALSE	191.9718@1.893-QP	#N/A	191.972	1.893	#N/A	#N/A	#N/A	QP
620	FALSE	191.98799@2.924-QP	#N/A	191.988	2.924	C9H4O3S	#N/A	#N/A	QP
621	FALSE	Citricacid@1.635-QP	Citricacid	192.026	1.635	C6H8O7	305	#N/A	QP
622	FALSE	Citricacid@1.318-QP	Citricacid	192.026	1.318	C6H8O7	305	Metabolic pathways;Biosynthesis of secondary metabolites;Microbial metabolism in diverse environments;Biosynthesis of plant secondary metabolites;Biosynthesis of cofactors;Biosynthesis of amino acids;Biosynthesis of alkaloids derived from shikimate pathway;2-Oxocarboxylic acid metabolism;Biosynthesis of phenylpropanoids;Biosynthesis of alkaloids derived from ornithine, lysine and nicotinic acid;O…	QP
623	FALSE	D-(-)-Quinicacid@1.048-QP	D-(-)-Quinicacid	192.062	1.048	C7H12O6	#N/A	#N/A	QP
624	FALSE	L-Seryl-L-serine@9.143-QP	L-Seryl-L-serine	192.075	9.143	C6H12N2O5	5382072	#N/A	QP
625	FALSE	1,2-dihydroxy-1,2-dihydro-7-hydroxymethylnaphthalene@8.96-QP	1,2-dihydroxy-1,2-dihydro-7-hydroxymethylnaphthalene	192.078	8.96	C11H12O3	#N/A	Microbial metabolism in diverse environments;Phenylpropanoid biosynthesis;Other	QP
626	FALSE	192.08696@5.018-QP	#N/A	192.087	5.018	C6H8N8	#N/A	#N/A	QP
627	FALSE	2,6-dihydroxy-N-methylmyosmine@2.017-QP	2,6-dihydroxy-N-methylmyosmine	192.089	2.017	C10H12N2O2	#N/A	Microbial metabolism in diverse environments;Other	QP
628	FALSE	ibufenac@13.833-QP	ibufenac	192.114	13.833	C12H16O2	14516	#N/A	QP
629	FALSE	192.14683@1.042-QP	#N/A	192.147	1.042	C8H20N2O3	#N/A	#N/A	QP
630	FALSE	193.01429@1.161-QP	#N/A	193.014	1.161	C6H12NPS2	#N/A	#N/A	QP
631	FALSE	3-Amino-2-mercapto-3H-quinazolin-4-one@9.491-QP	3-Amino-2-mercapto-3H-quinazolin-4-one	193.03	9.491	C8H7N3OS	634304	#N/A	QP
632	FALSE	CA9275000@11.734-QP	CA9275000	193.088	11.734	C14H11N	11443	#N/A	QP
633	FALSE	193.99473@1.038-QP	#N/A	193.995	1.038	C10H7ClS	#N/A	#N/A	QP
634	FALSE	194.01602@1.072-QP	#N/A	194.016	1.072	C6H11O3PS	#N/A	#N/A	QP
635	FALSE	Sulfoethylmethacrylate@1.503-QP	Sulfoethylmethacrylate	194.025	1.503	C6H10O5S	67123	#N/A	QP
636	FALSE	194.05676@9.753-QP	#N/A	194.057	9.753	C4H11N4O3P	#N/A	Metabolic pathways;Biosynthesis of secondary metabolites;Phenylpropanoid biosynthesis;Biosynthesis of phenylpropanoids	QP
637	FALSE	5-hydroxyconiferaldehyde@12.758-QP	5-hydroxyconiferaldehyde	194.057	12.758	C10H10O4	#N/A	Metabolic pathways;Biosynthesis of secondary metabolites;Phenylpropanoid biosynthesis;Biosynthesis of phenylpropanoids	QP
638	FALSE	Aminohippuricacid@7.2-QP	Aminohippuricacid	194.069	7.2	C9H10N2O3	2063	#N/A	QP
639	FALSE	Caffeine@7.954-QP	Caffeine	194.08	7.954	C8H10N4O2	2424	Metabolic pathways;Biosynthesis of secondary metabolites;Microbial metabolism in diverse environments;Biosynthesis of plant secondary metabolites;ABC transporters;Other	QP
640	FALSE	Caffeine@8.399-QP	Caffeine	194.08	8.399	C8H10N4O2	2424	Metabolic pathways;Biosynthesis of secondary metabolites;Microbial metabolism in diverse environments;Biosynthesis of plant secondary metabolites;ABC transporters;Other	QP
641	FALSE	3-hydroxyphenylvalericacid@10.67-QP	3-hydroxyphenylvalericacid	194.093	10.67	C11H14O3	#N/A	#N/A	QP
642	FALSE	3-hydroxyphenylvalericacid@14.322-QP	3-hydroxyphenylvalericacid	194.093	14.322	C11H14O3	#N/A	#N/A	QP
643	FALSE	3-hydroxyphenylvalericacid@12.352-QP	3-hydroxyphenylvalericacid	194.094	12.352	C11H14O3	#N/A	#N/A	QP
644	FALSE	6-hydroxypseudooxynicotine@6.334-QP	6-hydroxypseudooxynicotine	194.105	6.334	C10H14N2O2	388576	Metabolic pathways;Microbial metabolism in diverse environments;Other	QP
645	FALSE	PEG-4@3.446-QP	PEG-4	194.115	3.446	C8H18O5	7908	#N/A	QP
646	FALSE	194.12965@12.161-QP	#N/A	194.13	12.161	#N/A	#N/A	#N/A	QP
647	FALSE	194.12965@14.847-QP	#N/A	194.13	14.847	C6H19N4OP	#N/A	#N/A	QP
648	FALSE	194.14058@13.492-QP	#N/A	194.141	13.492	C5H19N6P	#N/A	#N/A	QP
649	FALSE	1-Adamantanecarbohydrazide@6.537-QP	1-Adamantanecarbohydrazide	194.141	6.537	C11H18N2O	298854	#N/A	QP
650	FALSE	3-(Trimethylsilyl)-1-propanesulfonate@4.456-QP	3-(Trimethylsilyl)-1-propanesulfonate	195.052	4.456	C6H15O3SSi	3441222	#N/A	QP
651	FALSE	2-Hydroxyhippuricacid@7.487-QP	2-Hydroxyhippuricacid	195.052	7.487	C9H9NO4	#N/A	#N/A	QP
652	FALSE	2-carboxy-2,3-dihydro-5,6-dihydroxyindole@4.041-QP	2-carboxy-2,3-dihydro-5,6-dihydroxyindole	195.053	4.041	C9H9NO4	#N/A	Metabolic pathways;Microbial metabolism in diverse environments;Other	QP
653	FALSE	2-carboxy-2,3-dihydro-5,6-dihydroxyindole@4.762-QP	2-carboxy-2,3-dihydro-5,6-dihydroxyindole	195.053	4.762	C9H9NO4	#N/A	Metabolic pathways;Microbial metabolism in diverse environments;Other	QP
654	FALSE	MES@1.068-QP	MES	195.056	1.068	C6H13NO4S	70541	#N/A	QP
655	FALSE	3,5-Diamino-N-carbamimidoyl-2-pyrazinecarboxamide@6.724-QP	3,5-Diamino-N-carbamimidoyl-2-pyrazinecarboxamide	195.087	6.724	C6H9N7O	2299741	#N/A	QP
656	FALSE	1-Deoxy-1-(methylamino)hexitol@1.001-QP	1-Deoxy-1-(methylamino)hexitol	195.11	1.001	C7H17NO5	3909	#N/A	QP
657	FALSE	1-Deoxy-1-(methylamino)hexitol@1.14-QP	1-Deoxy-1-(methylamino)hexitol	195.11	1.14	C7H17NO5	3909	#N/A	QP
658	FALSE	195.85723@1.018-QP	#N/A	195.857	1.018	CHCl3OP2	#N/A	#N/A	QP
659	FALSE	195.99269@24.922-QP	#N/A	195.993	24.922	C8H5O4P	#N/A	#N/A	QP
660	FALSE	Altronicacid@1.024-QP	Altronicacid	196.058	1.024	C6H12O7	#N/A	Metabolic pathways;Biosynthesis of secondary metabolites;Microbial metabolism in diverse environments;Biosynthesis of cofactors;Other	QP
661	FALSE	1,7-Dimethyluricacid@6.253-QP	1,7-Dimethyluricacid	196.059	6.253	C7H8N4O3	#N/A	Metabolic pathways;Biosynthesis of secondary metabolites;Microbial metabolism in diverse environments;Biosynthesis of cofactors;Other	QP
662	FALSE	1,3-dimethyluricacid@5.446-QP	1,3-dimethyluricacid	196.059	5.446	C7H8N4O3	#N/A	Metabolic pathways;Biosynthesis of secondary metabolites;Microbial metabolism in diverse environments;Biosynthesis of cofactors;Other	QP
663	FALSE	3,4-dimethoxyphenylaceticacid@9.277-QP	3,4-dimethoxyphenylaceticacid	196.073	9.277	C10H12O4	#N/A	Metabolic pathways;Biosynthesis of secondary metabolites;Microbial metabolism in diverse environments;Degradation of aromatic compounds;Phenylpropanoid biosynthesis;Other	QP
664	FALSE	3,4-dimethoxyphenylaceticacid@8.703-QP	3,4-dimethoxyphenylaceticacid	196.073	8.703	C10H12O4	#N/A	Metabolic pathways;Biosynthesis of secondary metabolites;Microbial metabolism in diverse environments;Degradation of aromatic compounds;Phenylpropanoid biosynthesis;Other	QP
665	FALSE	3,4-dimethoxyphenylaceticacid@9.904-QP	3,4-dimethoxyphenylaceticacid	196.073	9.904	C10H12O4	#N/A	Metabolic pathways;Biosynthesis of secondary metabolites;Microbial metabolism in diverse environments;Degradation of aromatic compounds;Phenylpropanoid biosynthesis;Other	QP
666	FALSE	3,4-dimethoxyphenylaceticacid@11.506-QP	3,4-dimethoxyphenylaceticacid	196.073	11.506	C10H12O4	#N/A	Metabolic pathways;Biosynthesis of secondary metabolites;Microbial metabolism in diverse environments;Degradation of aromatic compounds;Phenylpropanoid biosynthesis;Other	QP
667	FALSE	3,4-dimethoxyphenylaceticacid@9.543-QP	3,4-dimethoxyphenylaceticacid	196.073	9.543	C10H12O4	#N/A	Metabolic pathways;Biosynthesis of secondary metabolites;Microbial metabolism in diverse environments;Degradation of aromatic compounds;Phenylpropanoid biosynthesis;Other	QP
668	FALSE	196.08379@7.956-QP	#N/A	196.084	7.956	#N/A	#N/A	#N/A	QP
669	FALSE	196.09314@0.973-QP	#N/A	196.093	0.973	C4H8N10	#N/A	#N/A	QP
670	FALSE	6-Pentyl-1,2,4-benzenetriol@12.349-QP	6-Pentyl-1,2,4-benzenetriol	196.109	12.349	C11H16O3	7991171	#N/A	QP
671	FALSE	2,2'-(4-aminophenylimino)diethanol@6.644-QP	2,2'-(4-aminophenylimino)diethanol	196.12	6.644	C10H16N2O2	74056	#N/A	QP
672	FALSE	2,2'-(4-aminophenylimino)diethanol@6.842-QP	2,2'-(4-aminophenylimino)diethanol	196.121	6.842	C10H16N2O2	74056	#N/A	QP
673	FALSE	Deoxycholicacid@16.054-QP	Deoxycholicacid	196.145	16.054	C24H40O4	193196	#N/A	QP
674	FALSE	197.01276@10.412-QP	#N/A	197.013	10.412	C4H3N7OS	#N/A	#N/A	QP
675	FALSE	154388@7.186-QP	154388	197.05	7.186	C9H11NO2S	487927	#N/A	QP
676	FALSE	154388@6.583-QP	154388	197.05	6.583	C9H11NO2S	487927	#N/A	QP
677	FALSE	154388@10.179-QP	154388	197.051	10.179	C9H11NO2S	487927	#N/A	QP
678	FALSE	197.07697@1.013-QP	#N/A	197.077	1.013	C4H15N5S2	#N/A	#N/A	QP
679	FALSE	Benzanilide@15.871-QP	Benzanilide	197.084	15.871	C13H11NO	6900	#N/A	QP
680	FALSE	197.85489@1.036-QP	#N/A	197.855	1.036	#N/A	#N/A	#N/A	QP
681	FALSE	2-dechloroethylifosfamide@3.526-QP	2-dechloroethylifosfamide	198.032	3.526	C5H12ClN2O2P	#N/A	Drug metabolism - cytochrome P450	QP
682	FALSE	2-dechloroethylifosfamide@4.361-QP	2-dechloroethylifosfamide	198.032	4.361	C5H12ClN2O2P	#N/A	Drug metabolism - cytochrome P450	QP
683	FALSE	4-PhenylbenzoicAcid@12.658-QP	4-PhenylbenzoicAcid	198.067	12.658	C13H10O2	60090	Microbial metabolism in diverse environments;Other	QP
684	FALSE	198.07392@1.427-QP	#N/A	198.074	1.427	C6H14O7	#N/A	#N/A	QP
685	FALSE	5-acetylamino-6-amino-3-methyluracil@1.436-QP	5-acetylamino-6-amino-3-methyluracil	198.075	1.436	C7H10N4O3	#N/A	#N/A	QP
686	FALSE	5-acetylamino-6-amino-3-methyluracil@2.29-QP	5-acetylamino-6-amino-3-methyluracil	198.075	2.29	C7H10N4O3	#N/A	Other	QP
687	FALSE	5-acetylamino-6-amino-3-methyluracil@1.725-QP	5-acetylamino-6-amino-3-methyluracil	198.075	1.725	C7H10N4O3	#N/A	Other	QP
688	FALSE	Dihydroxydihydrocumicacid@9.034-QP	Dihydroxydihydrocumicacid	198.088	9.034	C10H14O4	#N/A	#N/A	QP
689	FALSE	metharbital@3.63-QP	metharbital	198.1	3.63	C9H14N2O3	3957	#N/A	QP
690	FALSE	198.16055@13.088-QP	#N/A	198.161	13.088	#N/A	#N/A	Other	QP
691	FALSE	198.16091@16.625-QP	#N/A	198.161	16.625	#N/A	#N/A	Other	QP
692	FALSE	4-Acetamidobenzenesulfinicacid@10.411-QP	4-Acetamidobenzenesulfinicacid	199.029	10.411	C8H9NO3S	364898	#N/A	QP
693	FALSE	2-(2-furanyl)-4-thiazolidinecarboxylicacid@8.588-QP	2-(2-furanyl)-4-thiazolidinecarboxylicacid	199.029	8.588	C8H9NO3S	2105768	#N/A	QP
694	FALSE	2-(2-furanyl)-4-thiazolidinecarboxylicacid@11.331-QP	2-(2-furanyl)-4-thiazolidinecarboxylicacid	199.029	11.331	C8H9NO3S	2105768	#N/A	QP
695	FALSE	199.03286@0.958-QP	#N/A	199.033	0.958	C5H5N5O4	#N/A	#N/A	QP
696	FALSE	199.06093@0.981-QP	#N/A	199.061	0.981	C5H14NO5P	#N/A	#N/A	QP
697	FALSE	Ecgoninemethylester@1.434-QP	Ecgoninemethylester	199.12	1.434	C10H17NO3	#N/A	Metabolic pathways;Biosynthesis of secondary metabolites;Biosynthesis of alkaloids derived from ornithine, lysine and nicotinic acid;Tropane, piperidine and pyridine alkaloid biosynthesis;Other	QP
698	FALSE	1739990@11.667-QP	1739990	199.229	11.667	C13H29N	37235	#N/A	QP
699	FALSE	199.56958@1.557-QP	#N/A	199.57	1.557	#N/A	#N/A	#N/A	QP
700	FALSE	199.9818@0.911-QP	#N/A	199.982	0.911	C7H5ClN2OS	#N/A	#N/A	QP
701	FALSE	3-Hydroxy-4-methoxy-5-sulfanylbenzoicacid@9.07-QP	3-Hydroxy-4-methoxy-5-sulfanylbenzoicacid	200.013	9.07	C8H8O4S	117595	#N/A	QP
702	FALSE	200.03856@12.278-QP	#N/A	200.039	12.278	C13H9Cl	#N/A	#N/A	QP
703	FALSE	200.03882@10.253-QP	#N/A	200.039	10.253	C13H9Cl	#N/A	#N/A	QP
704	FALSE	200.03882@11.239-QP	#N/A	200.039	11.239	C13H9Cl	#N/A	#N/A	QP
705	FALSE	Pentane-3,4-Diol-5-Phosphate@1.065-QP	Pentane-3,4-Diol-5-Phosphate	200.044	1.065	C5H13O6P	323560	#N/A	QP
706	FALSE	2,2,3,3-Tetrafluoropropylmethacrylate@16.522-QP	2,2,3,3-Tetrafluoropropylmethacrylate	200.046	16.522	C7H8F4O2	110110	#N/A	QP
707	FALSE	200.06508@2.393-QP	#N/A	200.065	2.393	C5H8N6O3	#N/A	#N/A	QP
708	FALSE	Dimethyl1,4-cyclohexanedicarboxylate@10.099-QP	Dimethyl1,4-cyclohexanedicarboxylate	200.104	10.099	C10H16O4	6930	#N/A	QP
709	FALSE	Dimethyl1,4-cyclohexanedicarboxylate@10.55-QP	Dimethyl1,4-cyclohexanedicarboxylate	200.104	10.55	C10H16O4	6930	#N/A	QP
710	FALSE	2-Isobutoxynaphthalene@10.293-QP	2-Isobutoxynaphthalene	200.119	10.293	C14H16O	15722	#N/A	QP
711	FALSE	200.15526@15.95-QP	#N/A	200.155	15.95	#N/A	#N/A	#N/A	QP
712	FALSE	200.17633@13.949-QP	#N/A	200.176	13.949	#N/A	#N/A	#N/A	QP
713	FALSE	Lauricacid@17.545-QP	Lauricacid	200.177	17.545	C12H24O2	#N/A	Metabolic pathways;Biosynthesis of secondary metabolites;Other	QP
714	FALSE	penicillanicacid@2.104-QP	penicillanicacid	201.045	2.104	C8H11NO3S	6626	#N/A	QP
715	FALSE	201.13542@10.819-QP	#N/A	201.135	10.819	#N/A	#N/A	#N/A	QP
716	FALSE	11-Aminoundecanoicacid@1.369-QP	11-Aminoundecanoicacid	201.172	1.369	C11H23NO2	16168	#N/A	QP
717	FALSE	201.95153@0.885-QP	#N/A	201.952	0.885	C2H3O9P	#N/A	#N/A	QP
718	FALSE	201.96126@0.897-QP	#N/A	201.961	0.897	C5H5N2OP3	#N/A	#N/A	QP
719	FALSE	6-Chloro-9H-beta-carboline@9.746-QP	6-Chloro-9H-beta-carboline	202.029	9.746	C11H7ClN2	9462140	#N/A	QP
720	FALSE	202.03167@0.863-QP	#N/A	202.032	0.863	C4H10O9	#N/A	#N/A	QP
721	FALSE	MFCD00056614@0.997-QP	MFCD00056614	202.045	0.997	C12H10OS	144417	#N/A	QP
722	FALSE	2-(1-Methyl-1H-indol-3-yl)-2-oxoacetamide@1.517-QP	2-(1-Methyl-1H-indol-3-yl)-2-oxoacetamide	202.074	1.517	C11H10N2O2	516522	Metabolic pathways;Biosynthesis of secondary metabolites;Other	QP
723	FALSE	3-tert-Butyladipicacid@10.889-QP	3-tert-Butyladipicacid	202.119	10.889	C10H18O4	#N/A	#N/A	QP
724	FALSE	3-tert-Butyladipicacid@10.513-QP	3-tert-Butyladipicacid	202.119	10.513	C10H18O4	#N/A	#N/A	QP
725	FALSE	202.13063@1.402-QP	#N/A	202.131	1.402	#N/A	#N/A	#N/A	QP
726	FALSE	2-(3,4-Dihydroxy-1-pyrrolidinyl)-3-methylbutanamide@1.407-QP	2-(3,4-Dihydroxy-1-pyrrolidinyl)-3-methylbutanamide	202.131	1.407	C9H18N2O3	74878384	#N/A	QP
727	FALSE	Dimethylarginine@1.031-QP	Dimethylarginine	202.142	1.031	C8H18N4O2	#N/A	#N/A	QP
728	FALSE	203.04855@13.154-QP	#N/A	203.049	13.154	C13H5N3	#N/A	#N/A	QP
729	FALSE	203.05523@1.409-QP	#N/A	203.055	1.409	C7H5N7O	#N/A	#N/A	QP
730	FALSE	203.07819@1.046-QP	#N/A	203.078	1.046	#N/A	#N/A	#N/A	QP
731	FALSE	203.08906@2.643-QP	#N/A	203.089	2.643	C9H18NPS	#N/A	#N/A	QP
732	FALSE	Acetyl-L-carnitine@1.199-QP	Acetyl-L-carnitine	203.115	1.199	C9H17NO4	10135006	#N/A	QP
733	FALSE	Gly-Lys@1.558-QP	Gly-Lys	203.126	1.558	C8H17N3O3	2338331	#N/A	QP
734	FALSE	guaiacolsulfate@4.641-QP	guaiacolsulfate	204.008	4.641	C7H8O5S	21078	#N/A	QP
735	FALSE	guaiacolsulfate@5.863-QP	guaiacolsulfate	204.008	5.863	C7H8O5S	21078	#N/A	QP
736	FALSE	204.02679@1.001-QP	#N/A	204.027	1.001	C3H5ClN8O	#N/A	2-Oxocarboxylic acid metabolism	QP
737	FALSE	2-ACETYL-3,5-DIMETHYLBENZO(B)THIOPHENE@0.998-QP	2-ACETYL-3,5-DIMETHYLBENZO(B)THIOPHENE	204.06	0.998	C12H12OS	526056	#N/A	QP
738	FALSE	3-O-Ethylascorbicacid@7.913-QP	3-O-Ethylascorbicacid	204.063	7.913	C8H12O6	132853	#N/A	QP
739	FALSE	DL-Tryptophan@2.955-QP	DL-Tryptophan	204.089	2.955	C11H12N2O2	1116	Metabolic pathways;Biosynthesis of secondary metabolites;Biosynthesis of plant secondary metabolites;Biosynthesis of cofactors;Biosynthesis of amino acids;Biosynthesis of alkaloids derived from shikimate pathway;2-Oxocarboxylic acid metabolism;Biosynthesis of phenylpropanoids;Glucosinolate biosynthesis;Other	QP
740	FALSE	204.11396@14.476-QP	#N/A	204.114	14.476	C7H17N4OP	#N/A	#N/A	QP
741	FALSE	(E,E)-alpha-Farnesene@14.625-QP	(E,E)-alpha-Farnesene	204.187	14.625	C15H24	4444849	Metabolic pathways;Biosynthesis of secondary metabolites;Other	QP
742	FALSE	205.02907@13.712-QP	#N/A	205.029	13.712	C11H8ClNO	#N/A	#N/A	QP
743	FALSE	205.02911@7.115-QP	#N/A	205.029	7.115	C11H8ClNO	#N/A	#N/A	QP
744	FALSE	Indole-3-lacticacid@8.141-QP	Indole-3-lacticacid	205.072	8.141	C11H11NO3	#N/A	#N/A	QP
745	FALSE	Indole-3-lacticacid@8.142-QP	Indole-3-lacticacid	205.073	8.142	C11H11NO3	#N/A	Metabolic pathways;Other	QP
746	FALSE	5-methoxyindoleaceticacid@9.003-QP	5-methoxyindoleaceticacid	205.073	9.003	C11H11NO3	#N/A	Metabolic pathways;Other	QP
747	FALSE	1-Benzylproline@8.992-QP	1-Benzylproline	205.11	8.992	C12H15NO2	489380	#N/A	QP
748	FALSE	205.11879@1.198-QP	#N/A	205.119	1.198	C6H15N5O3	#N/A	#N/A	QP
749	FALSE	Pyrogallol-1-O-sulphate@2.484-QP	Pyrogallol-1-O-sulphate	205.988	2.484	C6H6O6S	21119373	#N/A	QP
750	FALSE	5-sulfooxymethylfurfural@4.245-QP	5-sulfooxymethylfurfural	205.988	4.245	C6H6O6S	136301	#N/A	QP
751	FALSE	3-oxalomalicacid@0.976-QP	3-oxalomalicacid	206.006	0.976	C6H6O8	#N/A	Other	QP
752	FALSE	1,2-dihydroxy-dihydro-carboxynaphthalene@12.211-QP	1,2-dihydroxy-dihydro-carboxynaphthalene	206.057	12.211	C11H10O4	#N/A	Microbial metabolism in diverse environments;Degradation of aromatic compounds;Other	QP
753	FALSE	2-Phenylquinoxaline@13.495-QP	2-Phenylquinoxaline	206.083	13.495	C14H10N2	71069	#N/A	QP
754	FALSE	206.08334@13.731-QP	#N/A	206.083	13.731	#N/A	#N/A	#N/A	QP
755	FALSE	206.08335@12.215-QP	#N/A	206.083	12.215	#N/A	#N/A	#N/A	QP
756	FALSE	2-Phenylquinoxaline@14.767-QP	2-Phenylquinoxaline	206.083	14.767	C14H10N2	71069	#N/A	QP
757	FALSE	206.10248@6.031-QP	#N/A	206.102	6.031	C7H10N8	#N/A	#N/A	QP
758	FALSE	2-Ethyl-2-phenylmalonamide@9.219-QP	2-Ethyl-2-phenylmalonamide	206.105	9.219	C11H14N2O2	22078	Other	QP
759	FALSE	Plastoquinol-1@13.021-QP	Plastoquinol-1	206.13	13.021	C13H18O2	#N/A	Metabolic pathways;Other	QP
760	FALSE	BAY11-7082@2.498-QP	BAY11-7082	207.035	2.498	C10H9NO2S	4510086	#N/A	QP
761	FALSE	BAY11-7082@3.361-QP	BAY11-7082	207.035	3.361	C10H9NO2S	4510086	#N/A	QP
762	FALSE	BAY11-7082@6.988-QP	BAY11-7082	207.035	6.988	C10H9NO2S	4510086	#N/A	QP
763	FALSE	Miglitol@3.559-QP	Miglitol	207.11	3.559	C8H17NO5	390074	#N/A	QP
764	FALSE	Ciclopirox@3.13-QP	Ciclopirox	207.125	3.13	C12H17NO2	2647	Other	QP
765	FALSE	207.95781@2.388-QP	#N/A	207.958	2.388	C2HClN6O2S	#N/A	#N/A	QP
766	FALSE	208.01025@1.074-QP	#N/A	208.01	1.074	C3H5ClN6O3	#N/A	#N/A	QP
767	FALSE	3-Methyl-6-nitro-3,4-dihydro-2H-1,3-benzoxazin-2-one@1.362-QP	3-Methyl-6-nitro-3,4-dihydro-2H-1,3-benzoxazin-2-one	208.048	1.362	C9H8N2O4	117316	#N/A	QP
768	FALSE	208.07251@10.606-QP	#N/A	208.073	10.606	#N/A	#N/A	Metabolic pathways;Biosynthesis of secondary metabolites;Microbial metabolism in diverse environments;Degradation of aromatic compounds;Phenylpropanoid biosynthesis;Biosynthesis of phenylpropanoids;Other	QP
769	FALSE	Benzylsuccinicacid@11.353-QP	Benzylsuccinicacid	208.073	11.353	C11H12O4	#N/A	Metabolic pathways;Biosynthesis of secondary metabolites;Microbial metabolism in diverse environments;Degradation of aromatic compounds;Phenylpropanoid biosynthesis;Biosynthesis of phenylpropanoids;Other	QP
770	FALSE	Benzylsuccinicacid@11.756-QP	Benzylsuccinicacid	208.073	11.756	C11H12O4	#N/A	Metabolic pathways;Biosynthesis of secondary metabolites;Microbial metabolism in diverse environments;Degradation of aromatic compounds;Phenylpropanoid biosynthesis;Biosynthesis of phenylpropanoids;Other	QP
771	FALSE	Benzylsuccinicacid@12.033-QP	Benzylsuccinicacid	208.073	12.033	C11H12O4	#N/A	Metabolic pathways;Biosynthesis of secondary metabolites;Microbial metabolism in diverse environments;Degradation of aromatic compounds;Phenylpropanoid biosynthesis;Biosynthesis of phenylpropanoids;Other	QP
772	FALSE	L-Kynurenine@2.016-QP	L-Kynurenine	208.084	2.016	C10H12N2O3	141580	Metabolic pathways;Biosynthesis of cofactors;Other	QP
773	FALSE	Ethylglucoside@3.193-QP	Ethylglucoside	208.094	3.193	C8H16O6	9302607	#N/A	QP
774	FALSE	NP-021018@14.3-QP	NP-021018	208.109	14.3	C12H18O4	#N/A	Metabolic pathways;Biosynthesis of secondary metabolites;Biosynthesis of cofactors;Other	QP
775	FALSE	Asarone@12.222-QP	Asarone	208.109	12.222	C12H16O3	552532	Metabolic pathways;Biosynthesis of secondary metabolites;Biosynthesis of cofactors;Other	QP
776	FALSE	Elemicin@11.567-QP	Elemicin	208.109	11.567	C12H16O3	9830	Metabolic pathways;Biosynthesis of secondary metabolites;Biosynthesis of cofactors;Other	QP
777	FALSE	2-hydroxyiminostilbene@8.966-QP	2-hydroxyiminostilbene	209.083	8.966	C14H11NO	#N/A	Drug metabolism - cytochrome P450	QP
778	FALSE	2-hydroxyiminostilbene@10.383-QP	2-hydroxyiminostilbene	209.083	10.383	C14H11NO	#N/A	Drug metabolism - cytochrome P450	QP
779	FALSE	209.8515@0.982-QP	#N/A	209.851	0.982	#N/A	#N/A	#N/A	QP
780	FALSE	209.97972@1.243-QP	#N/A	209.98	1.243	CH2N6O5S	#N/A	#N/A	QP
781	FALSE	210.04983@4.743-QP	#N/A	210.05	4.743	C7H17OP3	#N/A	#N/A	QP
782	FALSE	210.06066@1.402-QP	#N/A	210.061	1.402	C6H17N2P3	#N/A	#N/A	QP
783	FALSE	L-4-Nitrophenylalanine@3.929-QP	L-4-Nitrophenylalanine	210.064	3.929	C9H10N2O4	13112	#N/A	QP
784	FALSE	1,2-anthracenediol@13.206-QP	1,2-anthracenediol	210.067	13.206	C14H10O2	#N/A	Metabolic pathways;Microbial metabolism in diverse environments;Degradation of aromatic compounds;Other	QP
785	FALSE	Sedoheptulose@6.945-QP	Sedoheptulose	210.074	6.945	C7H14O7	4573620	Metabolic pathways;Other	QP
786	FALSE	1,3,7-trimethyluricacid@7.156-QP	1,3,7-trimethyluricacid	210.075	7.156	C8H10N4O3	#N/A	Microbial metabolism in diverse environments;Other	QP
787	FALSE	3-(3,4-dimethoxyphenyl)-propionicacid@11.249-QP	3-(3,4-dimethoxyphenyl)-propionicacid	210.089	11.249	C11H14O4	#N/A	Metabolic pathways;Biosynthesis of secondary metabolites;Phenylpropanoid biosynthesis;Biosynthesis of phenylpropanoids	QP
788	FALSE	2,6-dihydroxypseudooxynicotine@3.888-QP	2,6-dihydroxypseudooxynicotine	210.1	3.888	C10H14N2O3	#N/A	Metabolic pathways;Microbial metabolism in diverse environments;Other	QP
789	FALSE	Cyclo(leucylprolyl)@8.079-QP	Cyclo(leucylprolyl)	210.136	8.079	C11H18N2O2	92947	#N/A	QP
790	FALSE	CYCLO(L-LEU-L-PRO)@3.704-QP	CYCLO(L-LEU-L-PRO)	210.136	3.704	C11H18N2O2	5428292	#N/A	QP
791	FALSE	Cyclo(leucylprolyl)@8.211-QP	Cyclo(leucylprolyl)	210.136	8.211	C11H18N2O2	92947	#N/A	QP
792	FALSE	Cyclo(leucylprolyl)@8.49-QP	Cyclo(leucylprolyl)	210.136	8.49	C11H18N2O2	92947	#N/A	QP
793	FALSE	11-Tetradecenal@18.096-QP	11-Tetradecenal	210.198	18.096	C14H26O	4896398	#N/A	QP
794	FALSE	DL4900000@11.476-QP	DL4900000	211.012	11.476	C9H9NOS2	19569	#N/A	QP
795	FALSE	Methyldopa@1.79-QP	Methyldopa	211.084	1.79	C10H13NO4	3995	#N/A	QP
796	FALSE	N,N'-Diphenylguanidine@7.26-QP	N,N'-Diphenylguanidine	211.11	7.26	C13H13N3	#N/A	#N/A	QP
797	FALSE	211.84901@0.992-QP	#N/A	211.849	0.992	#N/A	#N/A	#N/A	QP
798	FALSE	212.03073@12.359-QP	#N/A	212.031	12.359	C5H14N2OP2S	#N/A	#N/A	QP
799	FALSE	4,6-DMDBT@10.058-QP	4,6-DMDBT	212.065	10.058	C14H12S	1064783	#N/A	QP
800	FALSE	6,11-Dihydrodibenzo[b,e]thiepin@9.794-QP	6,11-Dihydrodibenzo[b,e]thiepin	212.067	9.794	C14H12S	120692	#N/A	QP
801	FALSE	3,4,5-trimethoxybenzoicacid@9.796-QP	3,4,5-trimethoxybenzoicacid	212.068	9.796	C10H12O5	#N/A	#N/A	QP
802	FALSE	2-{[Ethoxy(hydroxy)phosphoryl]oxy}-N,N,N-trimethylethanaminium@12.356-QP	2-{[Ethoxy(hydroxy)phosphoryl]oxy}-N,N,N-trimethylethanaminium	212.104	12.356	C7H19NO4P	26344105	Metabolic pathways;Biosynthesis of secondary metabolites;Other	QP
803	FALSE	AS8925000@8.96-QP	AS8925000	212.104	8.96	C11H16O4	15817	Metabolic pathways;Biosynthesis of secondary metabolites;Other	QP
804	FALSE	Butabarbital@1.419-QP	Butabarbital	212.115	1.419	C10H16N2O3	2385	#N/A	QP
805	FALSE	212.1382@8.535-QP	#N/A	212.138	8.535	C8H16N6O	#N/A	#N/A	QP
806	FALSE	212.13825@8.299-QP	#N/A	212.138	8.299	C8H16N6O	#N/A	#N/A	QP
807	FALSE	Oxododecenoicacid@12.61-QP	Oxododecenoicacid	212.14	12.61	C12H20O3	#N/A	#N/A	QP
808	FALSE	212.17655@17.471-QP	#N/A	212.177	17.471	#N/A	#N/A	Other	QP
809	FALSE	212.99838@1.01-QP	#N/A	212.998	1.01	C3H8N3O4PS	#N/A	#N/A	QP
810	FALSE	3-Indoxylsulphate@4.668-QP	3-Indoxylsulphate	213.009	4.668	C8H7NO4S	#N/A	#N/A	QP
811	FALSE	2-(2,5-Dioxo-1-pyrrolidinyl)succinate@2.766-QP	2-(2,5-Dioxo-1-pyrrolidinyl)succinate	213.027	2.766	C8H7NO6	9317472	#N/A	QP
812	FALSE	213.0485@0.96-QP	#N/A	213.048	0.96	C8H12N3PS	#N/A	#N/A	QP
813	FALSE	N-Butylbenzenesulfonamide@6.23-QP	N-Butylbenzenesulfonamide	213.082	6.23	C10H15NO2S	18156	#N/A	QP
814	FALSE	Methyl2-diazoacetamidohexanoate@1.426-QP	Methyl2-diazoacetamidohexanoate	213.111	1.426	C9H15N3O3	11274066	#N/A	QP
815	FALSE	213.84575@0.984-QP	#N/A	213.846	0.984	#N/A	#N/A	#N/A	QP
816	FALSE	214.00807@1.204-QP	#N/A	214.008	1.204	C4H2N6O5	#N/A	#N/A	QP
817	FALSE	214.02351@1.019-QP	#N/A	214.024	1.019	C2H3N10OP	#N/A	Metabolic pathways;Biosynthesis of secondary metabolites;Biosynthesis of plant secondary metabolites;Biosynthesis of cofactors;Other	QP
818	FALSE	chavicolhydrogensulfate@10.826-QP	chavicolhydrogensulfate	214.029	10.826	C9H10O4S	58170334	#N/A	QP
819	FALSE	214.02906@10.53-QP	#N/A	214.029	10.53	C3H11N4O3PS	#N/A	#N/A	QP
820	FALSE	214.03432@11.892-QP	#N/A	214.034	11.892	C7H2N8O	#N/A	#N/A	QP
821	FALSE	214.0919@0.863-QP	#N/A	214.092	0.863	C5H10N8O2	#N/A	#N/A	QP
822	FALSE	2-Oxo-6-pentyltetrahydro-2H-pyran-3-carboxylicacid@11.14-QP	2-Oxo-6-pentyltetrahydro-2H-pyran-3-carboxylicacid	214.12	11.14	C11H18O4	8374026	#N/A	QP
823	FALSE	2-Oxo-6-pentyltetrahydro-2H-pyran-3-carboxylicacid@10.966-QP	2-Oxo-6-pentyltetrahydro-2H-pyran-3-carboxylicacid	214.12	10.966	C11H18O4	8374026	#N/A	QP
824	FALSE	[(1,4-Dioxaspiro[4.5]dec-2-ylmethyl)amino](imino)methanaminium@14.543-QP	[(1,4-Dioxaspiro[4.5]dec-2-ylmethyl)amino](imino)methanaminium	214.156	14.543	C10H20N3O2	20133421	#N/A	QP
825	FALSE	[(2-Isopropyl-5-methylcyclohexyl)oxy]aceticacid@14.038-QP	[(2-Isopropyl-5-methylcyclohexyl)oxy]aceticacid	214.156	14.038	C12H22O3	88289	#N/A	QP
826	FALSE	[(2-Isopropyl-5-methylcyclohexyl)oxy]aceticacid@11.931-QP	[(2-Isopropyl-5-methylcyclohexyl)oxy]aceticacid	214.156	11.931	C12H22O3	88289	#N/A	QP
827	FALSE	214.1711@14.581-QP	#N/A	214.171	14.581	C16H22	#N/A	#N/A	QP
828	FALSE	Tridecylicacid@18.396-QP	Tridecylicacid	214.192	18.396	C13H26O2	#N/A	#N/A	QP
829	FALSE	214.8955@1.206-QP	#N/A	214.895	1.206	C2HCl2N3OP2	#N/A	#N/A	QP
830	FALSE	215.00823@11.755-QP	#N/A	215.008	11.755	C8H11NP2S	#N/A	#N/A	QP
831	FALSE	215.05299@6.243-QP	#N/A	215.053	6.243	C9H14NOPS	#N/A	#N/A	QP
832	FALSE	216.00824@7.065-QP	#N/A	216.008	7.065	C10H5N2O2P	#N/A	#N/A	QP
833	FALSE	D-Sulfophenylaceticacid@8.404-QP	D-Sulfophenylaceticacid	216.008	8.404	C8H8O5S	366201	#N/A	QP
834	FALSE	Dibenzo[d,f][1,3,2]dioxaphosphepine@13.861-QP	Dibenzo[d,f][1,3,2]dioxaphosphepine	216.033	13.861	C12H9O2P	9588739	#N/A	QP
835	FALSE	Methylerythrito4-phosphate@1.022-QP	Methylerythrito4-phosphate	216.039	1.022	C5H13O7P	#N/A	Metabolic pathways;Biosynthesis of secondary metabolites;Biosynthesis of plant secondary metabolites;Other	QP
836	FALSE	216.03915@1.209-QP	#N/A	216.039	1.209	C6H13ClO6	#N/A	Metabolic pathways;Biosynthesis of secondary metabolites;Biosynthesis of plant secondary metabolites;Other	QP
837	FALSE	216.05997@1.548-QP	#N/A	216.06	1.548	C5H8N6O4	#N/A	#N/A	QP
838	FALSE	216.06031@1.134-QP	#N/A	216.06	1.134	C7H13N4PS	#N/A	#N/A	QP
839	FALSE	216.06772@13.281-QP	#N/A	216.068	13.281	C15H8N2	#N/A	#N/A	QP
840	FALSE	cealysin@3.445-QP	cealysin	216.097	3.445	C6H12N6O3	63719	#N/A	QP
841	FALSE	216.11373@14.476-QP	#N/A	216.114	14.476	#N/A	#N/A	#N/A	QP
842	FALSE	Val-Val@1.252-QP	Val-Val	216.146	1.252	C10H20N2O3	96710	#N/A	QP
843	FALSE	216.17125@12.652-QP	#N/A	216.171	12.652	#N/A	#N/A	#N/A	QP
844	FALSE	216.17135@14.147-QP	#N/A	216.171	14.147	#N/A	#N/A	#N/A	QP
845	FALSE	216.17135@14.846-QP	#N/A	216.171	14.846	#N/A	#N/A	#N/A	QP
846	FALSE	216.97963@1.498-QP	#N/A	216.98	1.498	C5H5N3O3P2	#N/A	#N/A	QP
847	FALSE	217.03395@7.491-QP	#N/A	217.034	7.491	C8H14NP3	#N/A	#N/A	QP
848	FALSE	217.03956@1.625-QP	#N/A	217.04	1.625	C10H8N3OP	#N/A	#N/A	QP
849	FALSE	tyraminesulfate@1.948-QP	tyraminesulfate	217.04	1.948	C8H11NO4S	134849	#N/A	QP
850	FALSE	217.09197@0.963-QP	#N/A	217.092	0.963	#N/A	#N/A	#N/A	QP
851	FALSE	Propionylcarnitine@1.518-QP	Propionylcarnitine	217.131	1.518	C10H19NO4	#N/A	#N/A	QP
852	FALSE	217.91563@1.328-QP	#N/A	217.916	1.328	C6H2O3S3	#N/A	#N/A	QP
853	FALSE	218.01859@0.983-QP	#N/A	218.019	0.983	C6H6N2O7	#N/A	#N/A	QP
854	FALSE	218.02366@9.149-QP	#N/A	218.024	9.149	C10H7N2O2P	#N/A	#N/A	QP
855	FALSE	218.05398@1.023-QP	#N/A	218.054	1.023	C9H17P3	#N/A	#N/A	QP
856	FALSE	218.06346@1.104-QP	#N/A	218.063	1.104	C8H15N2OPS	#N/A	#N/A	QP
857	FALSE	Dinitropentamethylenetetramine@0.957-QP	Dinitropentamethylenetetramine	218.075	0.957	C5H10N6O4	63544	#N/A	QP
858	FALSE	4-Hydroxyprolylserine@12.354-QP	4-Hydroxyprolylserine	218.091	12.354	C8H14N2O5	8264831	#N/A	QP
859	FALSE	218.11418@8.342-QP	#N/A	218.114	8.342	#N/A	#N/A	#N/A	QP
860	FALSE	607391@1.189-QP	607391	218.162	1.189	C10H22N2O3	110032	#N/A	QP
861	FALSE	218.93718@1.408-QP	#N/A	218.937	1.408	CH4ClN3O4P2	#N/A	#N/A	QP
862	FALSE	219.05867@1.012-QP	#N/A	219.059	1.012	C7H14N3OPS	#N/A	#N/A	QP
863	FALSE	Aniracetam@7.526-QP	Aniracetam	219.089	7.526	C12H13NO3	2111	#N/A	QP
864	FALSE	Aniracetam@10.552-QP	Aniracetam	219.089	10.552	C12H13NO3	2111	#N/A	QP
865	FALSE	Cindunistat@12.478-QP	Cindunistat	219.104	12.478	C8H17N3O2S	7973569	#N/A	QP
866	FALSE	6-isothiocyanatohexylbenzene@2.911-QP	6-isothiocyanatohexylbenzene	219.109	2.911	C13H17NS	102738	#N/A	QP
867	FALSE	Pantothenicacid@2.887-QP	Pantothenicacid	219.11	2.887	C9H17NO5	#N/A	Metabolic pathways;Biosynthesis of secondary metabolites;Biosynthesis of cofactors;Other	QP
868	FALSE	219.90162@0.957-QP	#N/A	219.902	0.957	C3H4Cl2O3P2	#N/A	#N/A	QP
869	FALSE	220.00297@2.458-QP	#N/A	220.003	2.458	C9H5N2O3P	#N/A	#N/A	QP
870	FALSE	220.01052@0.974-QP	#N/A	220.011	0.974	C5H10N4P2S	#N/A	#N/A	QP
871	FALSE	Imidazole-acetolphosphate@1.558-QP	Imidazole-acetolphosphate	220.025	1.558	C6H9N2O5P	#N/A	Metabolic pathways;Biosynthesis of secondary metabolites;Biosynthesis of amino acids;Other	QP
872	FALSE	220.03395@0.979-QP	#N/A	220.034	0.979	C6H8N2O7	#N/A	#N/A	QP
873	FALSE	5-hydroxytryptophan@1.518-QP	5-hydroxytryptophan	220.084	1.518	C11H12N2O3	#N/A	Metabolic pathways;Biosynthesis of alkaloids derived from shikimate pathway;Other	QP
874	FALSE	Diethylbis(hydroxymethyl)malonate@5.551-QP	Diethylbis(hydroxymethyl)malonate	220.094	5.551	C9H16O6	275761	#N/A	QP
875	FALSE	DK3970000@14.067-QP	DK3970000	220.145	14.067	C14H20O2	12336	#N/A	QP
876	FALSE	1760709@1.05-QP	1760709	220.178	1.05	C10H24N2O3	19065	#N/A	QP
877	FALSE	220.86139@1.113-QP	#N/A	220.861	1.113	#N/A	#N/A	#N/A	QP
878	FALSE	221.04884@3.632-QP	#N/A	221.049	3.632	C6H13N3O2P2	#N/A	#N/A	QP
879	FALSE	2450705@1.459-QP	2450705	221.072	1.459	C8H15NO4S	134257	#N/A	QP
880	FALSE	221.9642@0.98-QP	#N/A	221.964	0.98	C3H10Cl2N2OP2	#N/A	#N/A	QP
881	FALSE	222.03078@9.517-QP	#N/A	222.031	9.517	C6H10N2O5S	#N/A	#N/A	QP
882	FALSE	3-(3,4,5-trimethoxyphenyl)propanoicacid@12.351-QP	3-(3,4,5-trimethoxyphenyl)propanoicacid	222.088	12.351	C12H16O5	#N/A	Metabolic pathways;Biosynthesis of secondary metabolites;Biosynthesis of cofactors;Phenylpropanoid biosynthesis;Other	QP
883	FALSE	222.09719@3.087-QP	#N/A	222.097	3.087	C7H10N8O	#N/A	#N/A	QP
884	FALSE	2-Nitroso-6,7-dimethoxytetrahydroisoquinoline@2.214-QP	2-Nitroso-6,7-dimethoxytetrahydroisoquinoline	222.1	2.214	C11H14N2O3	2283960	#N/A	QP
885	FALSE	222.12447@16.179-QP	#N/A	222.124	16.179	C7H19N4O2P	#N/A	#N/A	QP
886	FALSE	222.16054@20.987-QP	#N/A	222.161	20.987	C8H23N4OP	#N/A	#N/A	QP
887	FALSE	222.16068@16.598-QP	#N/A	222.161	16.598	C8H23N4OP	#N/A	#N/A	QP
888	FALSE	222.16078@13.968-QP	#N/A	222.161	13.968	#N/A	#N/A	#N/A	QP
889	FALSE	BHQ@14.446-QP	BHQ	222.161	14.446	C14H22O2	2283	#N/A	QP
890	FALSE	BHQ@11.516-QP	BHQ	222.161	11.516	C14H22O2	2283	#N/A	QP
891	FALSE	223.02139@5.734-QP	#N/A	223.021	5.734	C10H10NOPS	#N/A	#N/A	QP
892	FALSE	N-[(2-Chloroethyl)(nitroso)carbamoyl]alanine@1.842-QP	N-[(2-Chloroethyl)(nitroso)carbamoyl]alanine	223.037	1.842	C6H10ClN3O4	36831	#N/A	QP
893	FALSE	4-amino-3-hydroxyphenyl-2,4-dioxobutanoicacid@7.241-QP	4-amino-3-hydroxyphenyl-2,4-dioxobutanoicacid	223.047	7.241	C10H9NO5	#N/A	Metabolic pathways;Biosynthesis of secondary metabolites;Other	QP
894	FALSE	223.05471@13.155-QP	#N/A	223.055	13.155	#N/A	#N/A	#N/A	QP
895	FALSE	223.05498@9.599-QP	#N/A	223.055	9.599	#N/A	#N/A	#N/A	QP
896	FALSE	223.05801@11.511-QP	#N/A	223.058	11.511	C11H14NPS	#N/A	#N/A	QP
897	FALSE	DL-Cerulenin@1.395-QP	DL-Cerulenin	223.12	1.395	C12H17NO3	4508994	Biosynthesis of alkaloids derived from shikimate pathway	QP
898	FALSE	223.99794@1.542-QP	#N/A	223.998	1.542	C8H5N2O4P	#N/A	#N/A	QP
899	FALSE	224.01313@10.244-QP	#N/A	224.013	10.244	#N/A	#N/A	#N/A	QP
900	FALSE	5-(THIOPHEN-2-YLMETHYL)-1,3-DIAZINANE-2,4,6-TRIONE@0.873-QP	5-(THIOPHEN-2-YLMETHYL)-1,3-DIAZINANE-2,4,6-TRIONE	224.026	0.873	C9H8N2O3S	1660549	#N/A	QP
901	FALSE	224.04737@9.531-QP	#N/A	224.047	9.531	C7H14ClN2O2P	#N/A	#N/A	QP
902	FALSE	Benzylmalicacid@8.167-QP	Benzylmalicacid	224.068	8.167	C11H12O5	#N/A	Metabolic pathways;Biosynthesis of secondary metabolites;2-Oxocarboxylic acid metabolism;Phenylpropanoid biosynthesis;Biosynthesis of phenylpropanoids;Other	QP
903	FALSE	224.10101@10.889-QP	#N/A	224.101	10.889	C9H23P3	#N/A	#N/A	QP
904	FALSE	Urocanylcholine@14.299-QP	Urocanylcholine	224.14	14.299	C11H18N3O2	174428	#N/A	QP
905	FALSE	224.17647@17.422-QP	#N/A	224.176	17.422	#N/A	#N/A	#N/A	QP
906	FALSE	4-amino-4-deoxychorismaticacid@5.986-QP	4-amino-4-deoxychorismaticacid	225.063	5.986	C10H11NO5	#N/A	Metabolic pathways;Biosynthesis of secondary metabolites;Biosynthesis of cofactors;Other	QP
907	FALSE	225.0707@8.896-QP	#N/A	225.071	8.896	#N/A	#N/A	#N/A	QP
908	FALSE	Ancitabine@1.384-QP	Ancitabine	225.074	1.384	C9H11N3O4	16735663	#N/A	QP
909	FALSE	Acycloguanosine@2.972-QP	Acycloguanosine	225.085	2.972	C8H11N5O3	#N/A	Bile secretion	QP
910	FALSE	225.95746@12.489-QP	#N/A	225.957	12.489	C9H6OS3	#N/A	#N/A	QP
911	FALSE	225.96095@1.207-QP	#N/A	225.961	1.207	C6H8ClO3PS	#N/A	#N/A	QP
912	FALSE	5-acetylamino-6-formylamino-3-methyluracil@2.957-QP	5-acetylamino-6-formylamino-3-methyluracil	226.071	2.957	C8H10N4O4	#N/A	Metabolic pathways;Biosynthesis of secondary metabolites;Microbial metabolism in diverse environments;Other	QP
913	FALSE	226.07143@2.959-QP	#N/A	226.071	2.959	C9H6N8	#N/A	Metabolic pathways;Biosynthesis of secondary metabolites;Microbial metabolism in diverse environments;Other	QP
914	FALSE	Cyclopenta[cd]pyrene@1.404-QP	Cyclopenta[cd]pyrene	226.078	1.404	C18H10	31107	#N/A	QP
915	FALSE	(2,5-Dimethoxy-1,4-phenylene)diboronicacid@11.349-QP	(2,5-Dimethoxy-1,4-phenylene)diboronicacid	226.083	11.349	C8H12B2O6	4471878	#N/A	QP
916	FALSE	226.11671@13.305-QP	#N/A	226.117	13.305	C7H18N2O6	#N/A	#N/A	QP
917	FALSE	226.1169@12.743-QP	#N/A	226.117	12.743	C8H14N6O2	#N/A	#N/A	QP
918	FALSE	226.11711@1.011-QP	#N/A	226.117	1.011	C8H14N6O2	#N/A	#N/A	QP
919	FALSE	226.19174@14.763-QP	#N/A	226.192	14.763	#N/A	#N/A	#N/A	QP
920	FALSE	226.19205@18.331-QP	#N/A	226.192	18.331	#N/A	#N/A	#N/A	QP
921	FALSE	Myristoleicacid@18.135-QP	Myristoleicacid	226.192	18.135	C14H26O2	4444564	#N/A	QP
922	FALSE	226.99262@1.017-QP	#N/A	226.993	1.017	C6H11ClNO2PS	#N/A	#N/A	QP
923	FALSE	227.0241@9.017-QP	#N/A	227.024	9.017	C3H10N5O3PS	#N/A	#N/A	QP
924	FALSE	Euxanthone@8.464-QP	Euxanthone	228.041	8.464	C13H8O4	4444950	#N/A	QP
925	FALSE	RR0510000@11.57-QP	RR0510000	228.045	11.57	C10H12O4S	135864	#N/A	QP
926	FALSE	228.10731@0.87-QP	#N/A	228.107	0.87	C15H17P	#N/A	#N/A	QP
927	FALSE	228.10816@0.87-QP	#N/A	228.108	0.87	C6H12N8O2	#N/A	#N/A	QP
928	FALSE	Pro-hydroxy-pro@1.378-QP	Pro-hydroxy-pro	228.11	1.378	C10H16N2O4	#N/A	#N/A	QP
929	FALSE	Pro-hydroxy-pro@1.082-QP	Pro-hydroxy-pro	228.11	1.082	C10H16N2O4	#N/A	#N/A	QP
930	FALSE	glycyl-prolyl-glycinamide@1.023-QP	glycyl-prolyl-glycinamide	228.121	1.023	C9H16N4O3	401860	Metabolic pathways;Biosynthesis of secondary metabolites;Other	QP
931	FALSE	228.13496@12.2-QP	#N/A	228.135	12.2	#N/A	#N/A	#N/A	QP
932	FALSE	228.13501@12.41-QP	#N/A	228.135	12.41	#N/A	#N/A	#N/A	QP
933	FALSE	Dodecenedioicacid@11.902-QP	Dodecenedioicacid	228.135	11.902	C12H20O4	#N/A	Biosynthesis of secondary metabolites;Other	QP
934	FALSE	Prolylleucine@1.826-QP	Prolylleucine	228.147	1.826	C11H20N2O3	#N/A	#N/A	QP
935	FALSE	Prolylleucine@1.335-QP	Prolylleucine	228.147	1.335	C11H20N2O3	#N/A	#N/A	QP
936	FALSE	228.1864@15.964-QP	#N/A	228.186	15.964	#N/A	#N/A	#N/A	QP
937	FALSE	MyristicAcid@19.203-QP	MyristicAcid	228.208	19.203	C14H28O2	#N/A	Metabolic pathways;Other	QP
938	FALSE	5-Hydroxy-1H-indol-6-ylhydrogensulfate@3.986-QP	5-Hydroxy-1H-indol-6-ylhydrogensulfate	229.004	3.986	C8H7NO5S	389217	#N/A	QP
939	FALSE	9,9-dimethyltetrahydro-4a,7-methanooxazireno[3,2-i][2,1]benzothiazole3,3-dioxide@7.608-QP	9,9-dimethyltetrahydro-4a,7-methanooxazireno[3,2-i][2,1]benzothiazole3,3-dioxide	229.077	7.608	C10H15NO3S	497890	#N/A	QP
940	FALSE	Ergothioneine@1.186-QP	Ergothioneine	229.088	1.186	C9H15N3O2S	#N/A	#N/A	QP
941	FALSE	Ethyl-2,2-diethoxythylcyanoacetate@1.816-QP	Ethyl-2,2-diethoxythylcyanoacetate	229.131	1.816	C11H19NO4	3363695	#N/A	QP
942	FALSE	230.02395@10.2-QP	#N/A	230.024	10.2	C11H7N2O2P	#N/A	#N/A	QP
943	FALSE	4-Propionylphenylhydrogensulfate@9.426-QP	4-Propionylphenylhydrogensulfate	230.024	9.426	C9H10O5S	9038776	#N/A	QP
944	FALSE	230.04651@1.397-QP	#N/A	230.047	1.397	C7H10N4O3S	#N/A	#N/A	QP
945	FALSE	thymolsulfate@12.012-QP	thymolsulfate	230.06	12.012	C10H14O4S	10709958	#N/A	QP
946	FALSE	230.07555@1.545-QP	#N/A	230.076	1.545	C6H10N6O4	#N/A	#N/A	QP
947	FALSE	230.07591@1.377-QP	#N/A	230.076	1.377	C5H14N2O8	#N/A	#N/A	QP
948	FALSE	230.07617@3.177-QP	#N/A	230.076	3.177	C6H10N6O4	#N/A	#N/A	QP
949	FALSE	Dehydrocostuslactone@13.971-QP	Dehydrocostuslactone	230.13	13.971	C15H18O2	#N/A	#N/A	QP
950	FALSE	MethylN~2~-acetyl-N~5~-(diaminomethylene)-L-ornithinate@1.498-QP	MethylN~2~-acetyl-N~5~-(diaminomethylene)-L-ornithinate	230.137	1.498	C9H18N4O3	115784	#N/A	QP
951	FALSE	Dodecanedioicacid@12.641-QP	Dodecanedioicacid	230.151	12.641	C12H22O4	#N/A	#N/A	QP
952	FALSE	Dodecanedioicacid@13.007-QP	Dodecanedioicacid	230.151	13.007	C12H22O4	#N/A	#N/A	QP
953	FALSE	Leu-Val@2.308-QP	Leu-Val	230.162	2.308	C11H22N2O3	312585	#N/A	QP
954	FALSE	Leu-Val@1.369-QP	Leu-Val	230.163	1.369	C11H22N2O3	312585	#N/A	QP
955	FALSE	230.166@16.595-QP	#N/A	230.166	16.595	C10H23N4P	#N/A	#N/A	QP
956	FALSE	231.00266@11.331-QP	#N/A	231.003	11.331	C8H11NOP2S	#N/A	#N/A	QP
957	FALSE	paracetamolsulfate@4.175-QP	paracetamolsulfate	231.019	4.175	C8H9NO5S	75741	#N/A	QP
958	FALSE	paracetamolsulfate@7.566-QP	paracetamolsulfate	231.019	7.566	C8H9NO5S	75741	#N/A	QP
959	FALSE	231.05531@1.884-QP	#N/A	231.055	1.884	C11H10N3OP	#N/A	#N/A	QP
960	FALSE	Isocarboxazid@10.414-QP	Isocarboxazid	231.1	10.414	C12H13N3O2	3628	#N/A	QP
961	FALSE	Glycylglycyl-L-valine@1.233-QP	Glycylglycyl-L-valine	231.121	1.233	C9H17N3O4	167967	#N/A	QP
962	FALSE	CarnitineC4:0@2.486-QP	CarnitineC4:0	231.146	2.486	C11H21NO4	#N/A	#N/A	QP
963	FALSE	231.97754@6.81-QP	#N/A	231.978	6.81	C7H5O7P	#N/A	#N/A	QP
964	FALSE	232.00224@2.392-QP	#N/A	232.002	2.392	C4H6N6O2P2	#N/A	#N/A	QP
965	FALSE	Methyl4-(sulfooxy)benzoate@8.519-QP	Methyl4-(sulfooxy)benzoate	232.003	8.519	C8H8O6S	74850715	#N/A	QP
966	FALSE	232.02773@15.929-QP	#N/A	232.028	15.929	C14H4N2O2	#N/A	#N/A	QP
967	FALSE	232.02775@15.327-QP	#N/A	232.028	15.327	#N/A	#N/A	#N/A	QP
968	FALSE	4-Ethyl-2-methoxyphenylhydrogensulfate@11.154-QP	4-Ethyl-2-methoxyphenylhydrogensulfate	232.04	11.154	C9H12O5S	74852097	#N/A	QP
969	FALSE	232.04624@1.476-QP	#N/A	232.046	1.476	C4H13N2O7P	#N/A	#N/A	QP
970	FALSE	232.05503@0.997-QP	#N/A	232.055	0.997	C4H12N2O9	#N/A	#N/A	QP
971	FALSE	232.0701@10.289-QP	#N/A	232.07	10.289	C10H19P3	#N/A	#N/A	QP
972	FALSE	2-Methyl-5-acetonyl-7-hydroxychromone@11.186-QP	2-Methyl-5-acetonyl-7-hydroxychromone	232.073	11.186	C13H12O4	4477789	Metabolic pathways;Biosynthesis of secondary metabolites;Other	QP
973	FALSE	Phenobarbital@9.643-QP	Phenobarbital	232.084	9.643	C12H12N2O3	4599	#N/A	QP
974	FALSE	Phenobarbital@10.222-QP	Phenobarbital	232.084	10.222	C12H12N2O3	4599	#N/A	QP
975	FALSE	233.03453@1.646-QP	#N/A	233.035	1.646	C10H8N3O2P	#N/A	#N/A	QP
976	FALSE	233.06533@11.998-QP	#N/A	233.065	11.998	C9H18NP3	#N/A	#N/A	QP
977	FALSE	233.89585@0.942-QP	#N/A	233.896	0.942	C8H2Cl3P	#N/A	#N/A	QP
978	FALSE	234.01854@8.524-QP	#N/A	234.019	8.524	C10H7N2O3P	#N/A	#N/A	QP
979	FALSE	4-Ethyl-2,6-dihydroxyphenylhydrogensulfate@3.286-QP	4-Ethyl-2,6-dihydroxyphenylhydrogensulfate	234.019	3.286	C8H10O6S	74853119	#N/A	QP
980	FALSE	234.0436@13.862-QP	#N/A	234.044	13.862	C14H6N2O2	#N/A	#N/A	QP
981	FALSE	2-Pentofuranosyl-1,2,4-oxadiazolidine-3,5-dione@7.251-QP	2-Pentofuranosyl-1,2,4-oxadiazolidine-3,5-dione	234.049	7.251	C7H10N2O7	14911705	#N/A	QP
982	FALSE	234.07342@11.644-QP	#N/A	234.073	11.644	C4H11N8O2P	#N/A	Metabolic pathways;Microbial metabolism in diverse environments;Biosynthesis of cofactors;2-Oxocarboxylic acid metabolism;Other	QP
983	FALSE	1'-Acetoxychavicolacetate@14.767-QP	1'-Acetoxychavicolacetate	234.089	14.767	C13H14O4	354584	#N/A	QP
984	FALSE	26781@2.899-QP	26781	234.1	2.899	C12H14N2O3	106971	#N/A	QP
985	FALSE	Epirizole@1.424-QP	Epirizole	234.111	1.424	C11H14N4O2	3129	#N/A	QP
986	FALSE	Lidocaine@6.531-QP	Lidocaine	234.172	6.531	C14H22N2O	#N/A	Drug metabolism - cytochrome P450	QP
987	FALSE	235.04097@10.413-QP	#N/A	235.041	10.413	C4H10N7OPS	#N/A	#N/A	QP
988	FALSE	2-GUANIDINOETHYLMERCAPTOSUCCINICACID@6.227-QP	2-GUANIDINOETHYLMERCAPTOSUCCINICACID	235.063	6.227	C7H13N3O4S	3346	#N/A	QP
989	FALSE	PadimateA@6.17-QP	PadimateA	235.156	6.17	C14H21NO2	80159	#N/A	QP
990	FALSE	235.86521@1.254-QP	#N/A	235.865	1.254	C2H7BrP2S2	#N/A	#N/A	QP
991	FALSE	235.87556@0.956-QP	#N/A	235.876	0.956	C2H8BrP3S	#N/A	#N/A	QP
992	FALSE	235.99009@1.184-QP	#N/A	235.99	1.184	C7H9O5PS	#N/A	#N/A	QP
993	FALSE	235.9978@2.403-QP	#N/A	235.998	2.403	C9H5N2O4P	#N/A	#N/A	QP
994	FALSE	Formylkynurenine@8.66-QP	Formylkynurenine	236.079	8.66	C11H12N2O4	886	Metabolic pathways;Biosynthesis of cofactors;Other	QP
995	FALSE	Carbamazepine@11.734-QP	Carbamazepine	236.094	11.734	C15H12N2O	2457	Drug metabolism - cytochrome P450	QP
996	FALSE	4-(Heptyloxy)benzoicacid@13.044-QP	4-(Heptyloxy)benzoicacid	236.14	13.044	C14H20O3	76800	#N/A	QP
997	FALSE	(?)-Ambroxide@19.644-QP	(?)-Ambroxide	236.213	19.644	C16H28O	9032756	#N/A	QP
998	FALSE	(?)-Ambroxide@18.587-QP	(?)-Ambroxide	236.213	18.587	C16H28O	9032756	#N/A	QP
999	FALSE	237.07043@9.142-QP	#N/A	237.07	9.142	C7H18N3P3	#N/A	#N/A	QP
1000	FALSE	237.09875@8.207-QP	#N/A	237.099	8.207	#N/A	#N/A	#N/A	QP
1001	FALSE	3-ethyl-5-methyl-4-oxo-6-thieno[2,3-d]pyrimidinecarboxylicacid@11.339-QP	3-ethyl-5-methyl-4-oxo-6-thieno[2,3-d]pyrimidinecarboxylicacid	238.04	11.339	C10H10N2O3S	623306	#N/A	QP
1002	FALSE	3,4,5-trimethoxycinnamicacid@12.358-QP	3,4,5-trimethoxycinnamicacid	238.083	12.358	C12H14O5	#N/A	#N/A	QP
1003	FALSE	3,4,5-trimethoxycinnamicacid@8.959-QP	3,4,5-trimethoxycinnamicacid	238.083	8.959	C12H14O5	#N/A	#N/A	QP
1004	FALSE	Felbamate@1.524-QP	Felbamate	238.094	1.524	C11H14N2O4	#N/A	Drug metabolism - cytochrome P450	QP
1005	FALSE	238.11928@12.161-QP	#N/A	238.119	12.161	#N/A	#N/A	#N/A	QP
1006	FALSE	(+/-)-Muscone@19.681-QP	(+/-)-Muscone	238.229	19.681	C16H30O	10483	#N/A	QP
1007	FALSE	239.03134@1.405-QP	#N/A	239.031	1.405	C7H6ClN7O	#N/A	#N/A	QP
1008	FALSE	9-Carboxymethoxymethylguanine@2.542-QP	9-Carboxymethoxymethylguanine	239.065	2.542	C8H9N5O4	117782	#N/A	QP
1009	FALSE	4-Amino-1-(2-deoxy-2-methylenepentofuranosyl)-2(1H)-pyrimidinone@16.343-QP	4-Amino-1-(2-deoxy-2-methylenepentofuranosyl)-2(1H)-pyrimidinone	239.091	16.343	C10H13N3O4	10664631	#N/A	QP
1010	FALSE	2-AZIDO-3,8-DIMETHYLIMIDAZO[4,5-F]QUINOXALINE@17.194-QP	2-AZIDO-3,8-DIMETHYLIMIDAZO[4,5-F]QUINOXALINE	239.091	17.194	C11H9N7	130048	#N/A	QP
1011	FALSE	2-Amino-8-phosphonooctanoicacid@16.715-QP	2-Amino-8-phosphonooctanoicacid	239.091	16.715	C8H18NO5P	3011	#N/A	QP
1012	FALSE	Diphenamid@11.127-QP	Diphenamid	239.131	11.127	C16H17NO	13133	#N/A	QP
1013	FALSE	239.98154@1.487-QP	#N/A	239.982	1.487	C3H6N4O5P2	#N/A	#N/A	QP
1014	FALSE	Cystine@1.093-QP	Cystine	240.023	1.093	C6H12N2O4S2	#N/A	Metabolic pathways;ABC transporters;Other	QP
1015	FALSE	240.05732@13.862-QP	#N/A	240.057	13.862	C18H8O	#N/A	#N/A	QP
1016	FALSE	CMPF@12.35-QP	CMPF	240.099	12.35	C12H16O5	#N/A	#N/A	QP
1017	FALSE	3477@1.403-QP	3477	240.147	1.403	C12H20N2O3	4679	#N/A	QP
1018	FALSE	(1S,2R,5S)-2-Isopropyl-5-methylcyclohexyl3-oxobutanoate@15.157-QP	(1S,2R,5S)-2-Isopropyl-5-methylcyclohexyl3-oxobutanoate	240.171	15.157	C14H24O3	4927536	#N/A	QP
1019	FALSE	Pentadecenoicacid@18.945-QP	Pentadecenoicacid	240.208	18.945	C15H28O2	#N/A	#N/A	QP
1020	FALSE	241.05542@1.396-QP	#N/A	241.055	1.396	C7H18NO2P3	#N/A	#N/A	QP
1021	FALSE	8-Hydroxyacyclovir@3.688-QP	8-Hydroxyacyclovir	241.08	3.688	C8H11N5O4	117783	#N/A	QP
1022	FALSE	241.09223@2.91-QP	#N/A	241.092	2.91	C8H22NOP3	#N/A	#N/A	QP
1023	FALSE	241.12774@2.657-QP	#N/A	241.128	2.657	C8H15N7O2	#N/A	#N/A	QP
1024	FALSE	241.98501@10.963-QP	#N/A	241.985	10.963	C5H2N6O4S	#N/A	#N/A	QP
1025	FALSE	242.03597@12.814-QP	#N/A	242.036	12.814	C12H7ClN4	#N/A	#N/A	QP
1026	FALSE	MFCD00020690@8.162-QP	MFCD00020690	242.078	8.162	C15H14OS	68008	#N/A	QP
1027	FALSE	242.12555@6.624-QP	#N/A	242.126	6.624	C13H23PS	#N/A	#N/A	QP
1028	FALSE	{3-[(2-Hydrazinoethoxy)carbonyl]-2,2,5,5-tetramethyl-2,5-dihydro-1H-pyrrol-1-yl}oxidanyl@13.029-QP	{3-[(2-Hydrazinoethoxy)carbonyl]-2,2,5,5-tetramethyl-2,5-dihydro-1H-pyrrol-1-yl}oxidanyl	242.151	13.029	C11H20N3O3	9958511	#N/A	QP
1029	FALSE	3-Oxotetradecanoicacid@16.033-QP	3-Oxotetradecanoicacid	242.187	16.033	C14H26O3	399829	#N/A	QP
1030	FALSE	3-Oxotetradecanoicacid@16.608-QP	3-Oxotetradecanoicacid	242.187	16.608	C14H26O3	399829	#N/A	QP
1031	FALSE	242.202@15.963-QP	#N/A	242.202	15.963	#N/A	#N/A	#N/A	QP
1032	FALSE	Estra-4,9-diene@14.266-QP	Estra-4,9-diene	242.202	14.266	C18H26	19574196	#N/A	QP
1033	FALSE	Pentadecanoicacid@19.767-QP	Pentadecanoicacid	242.223	19.767	C15H30O2	#N/A	Other	QP
1034	FALSE	Pentadecanoicacid@19.983-QP	Pentadecanoicacid	242.223	19.983	C15H30O2	#N/A	Other	QP
1035	FALSE	243.01878@9.026-QP	#N/A	243.019	9.026	C13H9NS2	#N/A	#N/A	QP
1036	FALSE	2-(Acetylsulfamoyl)benzoicacid@6.03-QP	2-(Acetylsulfamoyl)benzoicacid	243.019	6.03	C9H9NO5S	9599924	#N/A	QP
1037	FALSE	243.07112@1.02-QP	#N/A	243.071	1.02	C8H14N5PS	#N/A	#N/A	QP
1038	FALSE	Cytidine@1.211-QP	Cytidine	243.086	1.211	C9H13N3O5	5940	Metabolic pathways;ABC transporters;Other	QP
1039	FALSE	Cytidine@1.028-QP	Cytidine	243.086	1.028	C9H13N3O5	5940	Metabolic pathways;ABC transporters;Other	QP
1040	FALSE	243.94603@0.929-QP	#N/A	243.946	0.929	C4H6ClN2O4PS	#N/A	#N/A	QP
1041	FALSE	244.02159@1.4-QP	#N/A	244.022	1.4	C4H9ClN4O6	#N/A	#N/A	QP
1042	FALSE	244.03912@8.244-QP	#N/A	244.039	8.244	C4H13N4O4PS	#N/A	#N/A	QP
1043	FALSE	4-PhenylazobenzoylChloride@10.535-QP	4-PhenylazobenzoylChloride	244.039	10.535	C13H9ClN2O	60272	#N/A	QP
1044	FALSE	244.05507@2.985-QP	#N/A	244.055	2.985	C7H19O3P3	#N/A	#N/A	QP
1045	FALSE	Carnidazole@2.123-QP	Carnidazole	244.062	2.123	C8H12N4O3S	2297829	#N/A	QP
1046	FALSE	Pseudouridine@1.299-QP	Pseudouridine	244.068	1.299	C9H12N2O6	#N/A	#N/A	QP
1047	FALSE	Pseudouridine@1.625-QP	Pseudouridine	244.068	1.625	C9H12N2O6	#N/A	#N/A	QP
1048	FALSE	Pseudouridine@1.622-QP	Pseudouridine	244.068	1.622	C9H12N2O6	#N/A	Metabolic pathways;ABC transporters;Other	QP
1049	FALSE	Pseudouridine@1.365-QP	Pseudouridine	244.068	1.365	C9H12N2O6	#N/A	Metabolic pathways;ABC transporters;Other	QP
1050	FALSE	rac-Etomidate@9.009-QP	rac-Etomidate	244.12	9.009	C14H16N2O2	33418	#N/A	QP
1051	FALSE	244.12946@10.034-QP	#N/A	244.129	10.034	C16H20S	#N/A	#N/A	QP
1052	FALSE	4-Hydroxyprolylleucine@7.227-QP	4-Hydroxyprolylleucine	244.141	7.227	C11H20N2O4	15233749	#N/A	QP
1053	FALSE	4-Hydroxyprolylleucine@1.626-QP	4-Hydroxyprolylleucine	244.141	1.626	C11H20N2O4	15233749	#N/A	QP
1054	FALSE	244.15282@2.018-QP	#N/A	244.153	2.018	C10H20N4O3	#N/A	#N/A	QP
1055	FALSE	244.20252@16.694-QP	#N/A	244.203	16.694	#N/A	#N/A	#N/A	QP
1056	FALSE	MFCD00059633@15.287-QP	MFCD00059633	244.203	15.287	C14H28O3	15252	#N/A	QP
1057	FALSE	245.03453@1.437-QP	#N/A	245.035	1.437	C11H8N3O2P	#N/A	#N/A	QP
1058	FALSE	1-(2-Deoxy-beta-D-erythro-pentofuranosyl)-5-methyl-1,3,5-triazinane-2,4-dione@1.278-QP	1-(2-Deoxy-beta-D-erythro-pentofuranosyl)-5-methyl-1,3,5-triazinane-2,4-dione	245.101	1.278	C9H15N3O5	169291	#N/A	QP
1059	FALSE	2-methylbutyrylcarnitine@4.481-QP	2-methylbutyrylcarnitine	245.162	4.481	C12H23NO4	4932320	#N/A	QP
1060	FALSE	2-methylbutyrylcarnitine@5.108-QP	2-methylbutyrylcarnitine	245.162	5.108	C12H23NO4	4932320	#N/A	QP
1061	FALSE	Valyllysine@1.044-QP	Valyllysine	245.173	1.044	C11H23N3O3	147014	#N/A	QP
1062	FALSE	4-hydroxychlorothalonil@14.011-QP	4-hydroxychlorothalonil	245.914	14.011	C8HCl3N2O	31530	#N/A	QP
1063	FALSE	245.99574@0.865-QP	#N/A	245.996	0.865	C5H11O7PS	#N/A	#N/A	QP
1064	FALSE	246.01842@6.838-QP	#N/A	246.018	6.838	C13H10OS2	#N/A	#N/A	QP
1065	FALSE	Ethyl4-(sulfooxy)benzoate@10.02-QP	Ethyl4-(sulfooxy)benzoate	246.019	10.02	C9H10O6S	58827588	#N/A	QP
1066	FALSE	246.04144@1.988-QP	#N/A	246.041	1.988	C7H10N4O4S	#N/A	#N/A	QP
1067	FALSE	246.05472@8.201-QP	#N/A	246.055	8.201	C6H10N6O3S	#N/A	#N/A	QP
1068	FALSE	246.05473@10.39-QP	#N/A	246.055	10.39	C6H10N6O3S	#N/A	#N/A	QP
1069	FALSE	(R)-3-Tosyloxy-1,2-propanediol@9.262-QP	(R)-3-Tosyloxy-1,2-propanediol	246.055	9.262	C10H14O5S	9588802	#N/A	QP
1070	FALSE	246.06153@1.52-QP	#N/A	246.062	1.52	C5H15N2O7P	#N/A	#N/A	QP
1071	FALSE	Nifurpirinol@3.543-QP	Nifurpirinol	246.064	3.543	C12H10N2O4	4940737	#N/A	QP
1072	FALSE	246.08351@10.89-QP	#N/A	246.084	10.89	C11H19O2PS	#N/A	#N/A	QP
1073	FALSE	1-Pentofuranosyldihydro-2,4(1H,3H)-pyrimidinedione@1.358-QP	1-Pentofuranosyldihydro-2,4(1H,3H)-pyrimidinedione	246.085	1.358	C9H14N2O6	284888	#N/A	QP
1074	FALSE	EMD-386088@7.2-QP	EMD-386088	246.092	7.2	C14H15ClN2	8306627	#N/A	QP
1075	FALSE	Gamma-glutamylvaline@2.216-QP	Gamma-glutamylvaline	246.12	2.216	C10H18N2O5	#N/A	Metabolic pathways;Other	QP
1076	FALSE	Gamma-glutamylvaline@1.705-QP	Gamma-glutamylvaline	246.121	1.705	C10H18N2O5	#N/A	Metabolic pathways;Other	QP
1077	FALSE	hypaphorine@5.861-QP	hypaphorine	246.136	5.861	C14H18N2O2	390633	#N/A	QP
1078	FALSE	ascr#2@9.958-QP	ascr#2	246.146	9.958	C12H22O5	17226058	#N/A	QP
1079	FALSE	2,4-Diamino-6,7-diisopropylpteridine@15.949-QP	2,4-Diamino-6,7-diisopropylpteridine	246.16	15.949	C12H18N6	141221	Biosynthesis of secondary metabolites;Other	QP
1080	FALSE	246.16826@1.104-QP	#N/A	246.168	1.104	C10H22N4O3	#N/A	#N/A	QP
1081	FALSE	246.17938@1.062-QP	#N/A	246.179	1.062	C9H22N6O2	#N/A	#N/A	QP
1082	FALSE	Dodecylbenzene@21.097-QP	Dodecylbenzene	246.234	21.097	C18H30	28977	#N/A	QP
1083	FALSE	N-[2-Hydroxy-4-(sulfooxy)phenyl]acetamide@3.339-QP	N-[2-Hydroxy-4-(sulfooxy)phenyl]acetamide	247.014	3.339	C8H9NO6S	34448633	#N/A	QP
1084	FALSE	2-Hydroxy-5-[2-(methylamino)ethyl]phenylhydrogensulfate@1.972-QP	2-Hydroxy-5-[2-(methylamino)ethyl]phenylhydrogensulfate	247.05	1.972	C9H13NO5S	391700	#N/A	QP
1085	FALSE	247.05033@1.341-QP	#N/A	247.05	1.341	C5H9N7O3S	#N/A	#N/A	QP
1086	FALSE	247.0559@1.383-QP	#N/A	247.056	1.383	C7H5N9O2	#N/A	#N/A	QP
1087	FALSE	247.08079@1.844-QP	#N/A	247.081	1.844	C9H9N7O2	#N/A	#N/A	QP
1088	FALSE	Parbendazole@8.061-QP	Parbendazole	247.131	8.061	C13H17N3O2	24775	#N/A	QP
1089	FALSE	CarnitineC4:0(OH)@1.366-QP	CarnitineC4:0(OH)	247.141	1.366	C11H21NO5	#N/A	#N/A	QP
1090	FALSE	Pethidine@6.095-QP	Pethidine	247.157	6.095	C15H21NO2	3918	Other	QP
1091	FALSE	247.99073@1.005-QP	#N/A	247.991	1.005	C3H12ClN4OP3	#N/A	#N/A	QP
1092	FALSE	Vanillicacid4-sulfate@5.801-QP	Vanillicacid4-sulfate	247.998	5.801	C8H8O7S	339308	#N/A	QP
1093	FALSE	Vanillicacid4-sulfate@6.099-QP	Vanillicacid4-sulfate	247.999	6.099	C8H8O7S	339308	#N/A	QP
1094	FALSE	Vanillicacid4-sulfate@8.006-QP	Vanillicacid4-sulfate	247.999	8.006	C8H8O7S	339308	#N/A	QP
1095	FALSE	Methanetetrayltetraacetate@2.965-QP	Methanetetrayltetraacetate	248.053	2.965	C9H12O8	9497554	#N/A	QP
1096	FALSE	248.05683@1.399-QP	#N/A	248.057	1.399	C7H12N4O4S	#N/A	Metabolic pathways;Other	QP
1097	FALSE	5-hydroxyindoleacetylglycine@7.623-QP	5-hydroxyindoleacetylglycine	248.079	7.623	C12H12N2O4	#N/A	Other	QP
1098	FALSE	248.08859@7.86-QP	#N/A	248.089	7.86	C14H18P2	#N/A	#N/A	QP
1099	FALSE	248.10131@13.231-QP	#N/A	248.101	13.231	C11H23P3	#N/A	#N/A	QP
1100	FALSE	248.14763@1.058-QP	#N/A	248.148	1.058	C11H25N2PS	#N/A	#N/A	QP
1101	FALSE	248.17635@17.503-QP	#N/A	248.176	17.503	C12H20N6	#N/A	#N/A	QP
1102	FALSE	248.1765@14.469-QP	#N/A	248.177	14.469	C10H25N4OP	#N/A	#N/A	QP
1103	FALSE	3,5-DI-TERT-BUTYL-4-HYDROXYACETOPHENONE@15.584-QP	3,5-DI-TERT-BUTYL-4-HYDROXYACETOPHENONE	248.177	15.584	C16H24O2	535622	#N/A	QP
1104	FALSE	248.99084@1.395-QP	#N/A	248.991	1.395	C4H14NO3P3S	#N/A	#N/A	QP
1105	FALSE	Boc-Met-OH@7.447-QP	Boc-Met-OH	249.103	7.447	C10H19NO4S	81110	#N/A	QP
1106	FALSE	Alprenolol@7.983-QP	Alprenolol	249.172	7.983	C15H23NO2	2035	#N/A	QP
1107	FALSE	Alprenolol@6.164-QP	Alprenolol	249.172	6.164	C15H23NO2	2035	#N/A	QP
1108	FALSE	Alprenolol@6.926-QP	Alprenolol	249.173	6.926	C15H23NO2	2035	#N/A	QP
1109	FALSE	1,2,4,5-Benzenetetracarboxylate@2.193-QP	1,2,4,5-Benzenetetracarboxylate	249.978	2.193	C10H2O8	4425529	#N/A	QP
1110	FALSE	249.9843@1.232-QP	#N/A	249.984	1.232	C3H7ClN2O9	#N/A	#N/A	QP
1111	FALSE	249.99638@9.588-QP	#N/A	249.996	9.588	C8H10O5S2	#N/A	#N/A	QP
1112	FALSE	DIPHENYLDITHIOPHOSPHONICACID@7.91-QP	DIPHENYLDITHIOPHOSPHONICACID	250.004	7.91	C12H11PS2	114725	#N/A	QP
1113	FALSE	250.02064@1.066-QP	#N/A	250.021	1.066	C4H11ClN2O8	#N/A	#N/A	QP
1114	FALSE	BisphenolS@11.81-QP	BisphenolS	250.029	11.81	C12H10O4S	6374	#N/A	QP
1115	FALSE	Gamma-glutamylcysteine@14.542-QP	Gamma-glutamylcysteine	250.062	14.542	C8H14N2O5S	#N/A	Metabolic pathways;Biosynthesis of cofactors;Other	QP
1116	FALSE	Trolox@14.3-QP	Trolox	250.119	14.3	C14H18O4	37117	#N/A	QP
1117	FALSE	4-tert-Octylphenolmonoethoxylate@18.039-QP	4-tert-Octylphenolmonoethoxylate	250.192	18.039	C16H26O2	5388	Other	QP
1118	FALSE	4-tert-Octylphenolmonoethoxylate@18.309-QP	4-tert-Octylphenolmonoethoxylate	250.192	18.309	C16H26O2	5388	#N/A	QP
1119	FALSE	250.96338@7.68-QP	#N/A	250.963	7.68	C9H2NO6P	#N/A	#N/A	QP
1120	FALSE	251.02179@11.751-QP	#N/A	251.022	11.751	C7H5N7O2S	#N/A	#N/A	QP
1121	FALSE	4-Chloro-N-(4-chlorobenzyl)aniline@15.389-QP	4-Chloro-N-(4-chlorobenzyl)aniline	251.026	15.389	C13H11Cl2N	808562	#N/A	QP
1122	FALSE	N-feruloylglycine@7.946-QP	N-feruloylglycine	251.079	7.946	C12H13NO5	4444158	#N/A	QP
1123	FALSE	251.12256@14.303-QP	#N/A	251.123	14.303	C7H17N5O5	#N/A	#N/A	QP
1124	FALSE	252.08451@3.304-QP	#N/A	252.085	3.304	C10H20O3S2	#N/A	Metabolic pathways;ABC transporters;Other	QP
1125	FALSE	2-hydroxycarbamazepine@10.384-QP	2-hydroxycarbamazepine	252.089	10.384	C15H12N2O2	#N/A	Drug metabolism - cytochrome P450	QP
1126	FALSE	Alanyltyrosine@1.571-QP	Alanyltyrosine	252.11	1.571	C12H16N2O4	#N/A	#N/A	QP
1127	FALSE	3-beta-D-Glucopyranosyloxy-2-butanol@5.687-QP	3-beta-D-Glucopyranosyloxy-2-butanol	252.12	5.687	C10H20O7	21865767	#N/A	QP
1128	FALSE	[4-methoxy-6-(1-piperidinyl)-1H-1,3,5-triazin-2-ylidene]-nitrosomethanamine@14.78-QP	[4-methoxy-6-(1-piperidinyl)-1H-1,3,5-triazin-2-ylidene]-nitrosomethanamine	252.132	14.78	C10H16N6O2	5171922	#N/A	QP
1129	FALSE	252.13475@12.988-QP	#N/A	252.135	12.988	C8H21N4O3P	#N/A	#N/A	QP
1130	FALSE	Hexadecadienoicacid@18.816-QP	Hexadecadienoicacid	252.208	18.816	C16H28O2	#N/A	#N/A	QP
1131	FALSE	253.00172@4.185-QP	#N/A	253.002	4.185	C6H3N7O3S	#N/A	#N/A	QP
1132	FALSE	3-acetamido-5-chloro-2-benzofurancarboxylicacid@1.066-QP	3-acetamido-5-chloro-2-benzofurancarboxylicacid	253.014	1.066	C11H8ClNO4	561816	#N/A	QP
1133	FALSE	Sulfamethoxazole@9.49-QP	Sulfamethoxazole	253.051	9.49	C10H11N3O3S	5138	#N/A	QP
1134	FALSE	Sulfamethoxazole@7.545-QP	Sulfamethoxazole	253.051	7.545	C10H11N3O3S	5138	#N/A	QP
1135	FALSE	Sulfamethoxazole@4.546-QP	Sulfamethoxazole	253.051	4.546	C10H11N3O3S	5138	#N/A	QP
1136	FALSE	Sulfamethoxazole@10.057-QP	Sulfamethoxazole	253.051	10.057	C10H11N3O3S	5138	#N/A	QP
1137	FALSE	253.09184@6.238-QP	#N/A	253.092	6.238	C9H22NOP3	#N/A	#N/A	QP
1138	FALSE	253.12762@2.955-QP	#N/A	253.128	2.955	C10H26NP3	#N/A	#N/A	QP
1139	FALSE	(1,2-Diphenyl-2-pyrrolidinyl)methanol@9.085-QP	(1,2-Diphenyl-2-pyrrolidinyl)methanol	253.146	9.085	C17H19NO	10612031	#N/A	QP
1140	FALSE	cyclo(prolylarginyl)@2.452-QP	cyclo(prolylarginyl)	253.153	2.452	C11H19N5O2	21377701	#N/A	QP
1141	FALSE	253.8155@1.013-QP	#N/A	253.815	1.013	CHBrCl2N2S2	#N/A	#N/A	QP
1142	FALSE	254.06523@15.87-QP	#N/A	254.065	15.87	C11H15N2OPS	#N/A	#N/A	QP
1143	FALSE	254.08901@16.029-QP	#N/A	254.089	16.029	C13H19OPS	#N/A	#N/A	QP
1144	FALSE	[(Diethoxyphosphoryl)oxy]methylbutyrate@14.54-QP	[(Diethoxyphosphoryl)oxy]methylbutyrate	254.093	14.54	C9H19O6P	8013655	#N/A	QP
1145	FALSE	10-hydroxycarbazepine@10.506-QP	10-hydroxycarbazepine	254.105	10.506	C15H14N2O2	#N/A	Drug metabolism - cytochrome P450;Other	QP
1146	FALSE	10-hydroxycarbazepine@9.865-QP	10-hydroxycarbazepine	254.105	9.865	C15H14N2O2	#N/A	Drug metabolism - cytochrome P450;Other	QP
1147	FALSE	1-[4-(2,3-Dihydroxypropoxy)-3-methoxyphenyl]-1-propanone@11.754-QP	1-[4-(2,3-Dihydroxypropoxy)-3-methoxyphenyl]-1-propanone	254.114	11.754	C13H18O5	92629	#N/A	QP
1148	FALSE	254.14807@12.385-QP	#N/A	254.148	12.385	C9H22N2O6	#N/A	#N/A	QP
1149	FALSE	254.1481@15.651-QP	#N/A	254.148	15.651	C10H18N6O2	#N/A	#N/A	QP
1150	FALSE	1957290@13.087-QP	1957290	254.151	13.087	C14H22O4	73148	#N/A	QP
1151	FALSE	1957290@13.328-QP	1957290	254.151	13.328	C14H22O4	73148	#N/A	QP
1152	FALSE	7-Isopropyl-4a-methyl-1-methylene-1,2,3,4,4a,9,10,10a-octahydrophenanthrene@13.845-QP	7-Isopropyl-4a-methyl-1-methylene-1,2,3,4,4a,9,10,10a-octahydrophenanthrene	254.202	13.845	C19H26	21864868	#N/A	QP
1153	FALSE	PalmitoleicAcid@20.234-QP	PalmitoleicAcid	254.223	20.234	C16H30O2	#N/A	#N/A	QP
1154	FALSE	PalmitoleicAcid@19.646-QP	PalmitoleicAcid	254.223	19.646	C16H30O2	#N/A	Other	QP
1155	FALSE	2-(3,4-Dimethoxybenzoyl)hydrazinecarbothioamide@7.471-QP	2-(3,4-Dimethoxybenzoyl)hydrazinecarbothioamide	255.067	7.471	C10H13N3O3S	589466	#N/A	QP
1156	FALSE	255.81303@1.057-QP	#N/A	255.813	1.057	#N/A	#N/A	#N/A	QP
1157	FALSE	255.98772@1.347-QP	#N/A	255.988	1.347	C10H10O2P2S	#N/A	#N/A	QP
1158	FALSE	256.06187@3.708-QP	#N/A	256.062	3.708	C12H18P2S	#N/A	Biosynthesis of secondary metabolites;Other	QP
1159	FALSE	2'-Deoxy-5-formyluridine@7.539-QP	2'-Deoxy-5-formyluridine	256.069	7.539	C10H12N2O6	89010	#N/A	QP
1160	FALSE	3-Hydroxy-3-(2,3,4-trimethoxyphenyl)propanoicacid@8.961-QP	3-Hydroxy-3-(2,3,4-trimethoxyphenyl)propanoicacid	256.094	8.961	C12H16O6	45382191	#N/A	QP
1161	FALSE	5'-Methylthymidine@2.835-QP	5'-Methylthymidine	256.106	2.835	C11H16N2O5	18715137	#N/A	QP
1162	FALSE	256.11969@10.58-QP	#N/A	256.12	10.58	C11H12N8	#N/A	#N/A	QP
1163	FALSE	256.11969@10.755-QP	#N/A	256.12	10.755	C11H12N8	#N/A	#N/A	QP
1164	FALSE	256.12005@9.721-QP	#N/A	256.12	9.721	C11H12N8	#N/A	#N/A	QP
1165	FALSE	HexylHIBO@7.989-QP	HexylHIBO	256.141	7.989	C12H20N2O4	3204121	#N/A	QP
1166	FALSE	Ethylenedodecanedioate@13.807-QP	Ethylenedodecanedioate	256.166	13.807	C14H24O4	37664	#N/A	QP
1167	FALSE	(5E)-5-Tetradecenedioicacid@14.068-QP	(5E)-5-Tetradecenedioicacid	256.166	14.068	C14H24O4	24765779	#N/A	QP
1168	FALSE	Ethylenedodecanedioate@13.81-QP	Ethylenedodecanedioate	256.167	13.81	C14H24O4	37664	#N/A	QP
1169	FALSE	Estra-1,3,5(10)-trien-3-ol@10.135-QP	Estra-1,3,5(10)-trien-3-ol	256.182	10.135	C18H24O	388789	#N/A	QP
1170	FALSE	Bullatantriol@16.431-QP	Bullatantriol	256.203	16.431	C15H28O3	28424470	#N/A	QP
1171	FALSE	7-Isopropyl-1,4a-dimethyl-1,2,3,4,4a,9,10,10a-octahydrophenanthrene@15.682-QP	7-Isopropyl-1,4a-dimethyl-1,2,3,4,4a,9,10,10a-octahydrophenanthrene	256.218	15.682	C19H28	191007	#N/A	QP
1172	FALSE	7-Isopropyl-1,4a-dimethyl-1,2,3,4,4a,9,10,10a-octahydrophenanthrene@12.689-QP	7-Isopropyl-1,4a-dimethyl-1,2,3,4,4a,9,10,10a-octahydrophenanthrene	256.218	12.689	C19H28	191007	#N/A	QP
1173	FALSE	Palmiticacid@16.739-QP	Palmiticacid	256.239	16.739	C16H32O2	#N/A	#N/A	QP
1174	FALSE	Palmiticacid@20.747-QP	Palmiticacid	256.239	20.747	C16H32O2	#N/A	#N/A	QP
1175	FALSE	Palmiticacid@21.286-QP	Palmiticacid	256.239	21.286	C16H32O2	#N/A	Metabolic pathways;Biosynthesis of plant secondary metabolites;Biosynthesis of unsaturated fatty acids;Other	QP
1176	FALSE	256.54888@1.557-QP	#N/A	256.549	1.557	#N/A	#N/A	#N/A	QP
1177	FALSE	256.6368@15.219-QP	#N/A	256.637	15.219	#N/A	#N/A	#N/A	QP
1178	FALSE	256.94115@1.006-QP	#N/A	256.941	1.006	C6H2ClN5OP2	#N/A	#N/A	QP
1179	FALSE	257.06561@1.048-QP	#N/A	257.066	1.048	C8H16ClNO6	#N/A	Metabolic pathways;Biosynthesis of secondary metabolites;Other	QP
1180	FALSE	257.06587@9.295-QP	#N/A	257.066	9.295	C11H18NP3	#N/A	Metabolic pathways;Biosynthesis of secondary metabolites;Other	QP
1181	FALSE	2-Imino-5-[(3aS,4S,6aR)-2-oxohexahydro-1H-thieno[3,4-d]imidazol-4-yl]pentanoicacid@5.068-QP	2-Imino-5-[(3aS,4S,6aR)-2-oxohexahydro-1H-thieno[3,4-d]imidazol-4-yl]pentanoicacid	257.083	5.068	C10H15N3O3S	9697943	#N/A	QP
1182	FALSE	5-methylcytidine@1.489-QP	5-methylcytidine	257.101	1.489	C10H15N3O5	#N/A	#N/A	QP
1183	FALSE	Glycerophosphorylcholine@1.032-QP	Glycerophosphorylcholine	257.102	1.032	C8H20NO6P	#N/A	#N/A	QP
1184	FALSE	CarnitineC6:1@6.228-QP	CarnitineC6:1	257.162	6.228	C13H23NO4	#N/A	#N/A	QP
1185	FALSE	257.94031@0.923-QP	#N/A	257.94	0.923	C4H6Cl2N4OP2	#N/A	#N/A	QP
1186	FALSE	258.00864@10.17-QP	#N/A	258.009	10.17	C5H13N2O4P3	#N/A	#N/A	QP
1187	FALSE	258.04459@13.289-QP	#N/A	258.045	13.289	C14H11O3P	#N/A	#N/A	QP
1188	FALSE	258.10675@2.393-QP	#N/A	258.107	2.393	C7H18N2O8	#N/A	#N/A	QP
1189	FALSE	Tetradecanedioicacid@14.409-QP	Tetradecanedioicacid	258.182	14.409	C14H26O4	12630	#N/A	QP
1190	FALSE	Tetradecanedioicacid@14.831-QP	Tetradecanedioicacid	258.182	14.831	C14H26O4	12630	#N/A	QP
1191	FALSE	258.95671@0.96-QP	#N/A	258.957	0.96	C5H8ClNO5P2	#N/A	#N/A	QP
1192	FALSE	259.0137@9.038-QP	#N/A	259.014	9.038	C13H9NOS2	#N/A	#N/A	QP
1193	FALSE	2-Oxiranylmethyl3-nitrobenzenesulfonate@3.906-QP	2-Oxiranylmethyl3-nitrobenzenesulfonate	259.014	3.906	C9H9NO6S	252894	#N/A	QP
1194	FALSE	259.0502@6.41-QP	#N/A	259.05	6.41	C6H9N7O3S	#N/A	#N/A	QP
1195	FALSE	259.05046@1.853-QP	#N/A	259.05	1.853	C6H9N7O3S	#N/A	#N/A	QP
1196	FALSE	propranolol@9.562-QP	propranolol	259.156	9.562	C16H21NO2	4777	Biosynthesis of secondary metabolites;Other	QP
1197	FALSE	Hexanoylcarnitine@7.433-QP	Hexanoylcarnitine	259.178	7.433	C13H25NO4	#N/A	#N/A	QP
1198	FALSE	259.90985@0.901-QP	#N/A	259.91	0.901	C2H3ClN4O3P2S	#N/A	#N/A	QP
1199	FALSE	259.91993@0.929-QP	#N/A	259.92	0.929	C4HClO11	#N/A	#N/A	QP
1200	FALSE	260.0031@1.018-QP	#N/A	260.003	1.018	C7H16O2S4	#N/A	#N/A	QP
1201	FALSE	Cyclophosphamide@10.086-QP	Cyclophosphamide	260.024	10.086	C7H15Cl2N2O2P	2804	Drug metabolism - cytochrome P450	QP
1202	FALSE	Ifosfamide@9.512-QP	Ifosfamide	260.024	9.512	C7H15Cl2N2O2P	3562	Drug metabolism - cytochrome P450	QP
1203	FALSE	260.03424@10.07-QP	#N/A	260.034	10.07	C7H4N10S	#N/A	#N/A	QP
1204	FALSE	Diethyl3,4-dihydroxy-2,5-thiophenedicarboxylate@11.44-QP	Diethyl3,4-dihydroxy-2,5-thiophenedicarboxylate	260.035	11.44	C10H12O6S	10221533	#N/A	QP
1205	FALSE	Diethyl3,4-dihydroxy-2,5-thiophenedicarboxylate@7.87-QP	Diethyl3,4-dihydroxy-2,5-thiophenedicarboxylate	260.035	7.87	C10H12O6S	10221533	#N/A	QP
1206	FALSE	260.09047@7.135-QP	#N/A	260.09	7.135	C12H20O2S2	#N/A	#N/A	QP
1207	FALSE	Gamma-glutamylisoleucine@3.066-QP	Gamma-glutamylisoleucine	260.136	3.066	C11H20N2O5	#N/A	#N/A	QP
1208	FALSE	260.17619@16.593-QP	#N/A	260.176	16.593	C11H25N4OP	#N/A	#N/A	QP
1209	FALSE	2-methoxyacetaminophensulfate@5.643-QP	2-methoxyacetaminophensulfate	261.029	5.643	C9H11NO6S	9986826	#N/A	QP
1210	FALSE	O-Sulfo-L-tyrosine@1.518-QP	O-Sulfo-L-tyrosine	261.03	1.518	C9H11NO6S	448617	#N/A	QP
1211	FALSE	261.05996@5.732-QP	#N/A	261.06	5.732	C8H11N3O7	#N/A	#N/A	QP
1212	FALSE	261.06079@5.725-QP	#N/A	261.061	5.725	C8H11N3O7	#N/A	#N/A	QP
1213	FALSE	3-Hydroxy-3-[(3-methylbutanoyl)oxy]-4-(trimethylammonio)butanoate@1.59-QP	3-Hydroxy-3-[(3-methylbutanoyl)oxy]-4-(trimethylammonio)butanoate	261.157	1.59	C12H23NO5	35797888	#N/A	QP
1214	FALSE	261.87924@1.306-QP	#N/A	261.879	1.306	#N/A	#N/A	#N/A	QP
1215	FALSE	261.98529@1.014-QP	#N/A	261.985	1.014	C6H13Cl2N2OPS	#N/A	#N/A	QP
1216	FALSE	262.00537@0.976-QP	#N/A	262.005	0.976	C5H17N2P3S2	#N/A	#N/A	QP
1217	FALSE	Homovanillicacidsulfate@6.085-QP	Homovanillicacidsulfate	262.014	6.085	C9H10O7S	21896746	#N/A	QP
1218	FALSE	262.0212@10.566-QP	#N/A	262.021	10.566	C7H12N4OP2S	#N/A	#N/A	QP
1219	FALSE	3,6-Bis[2-(methylthio)ethyl]-2,5-piperazinedione@12.352-QP	3,6-Bis[2-(methylthio)ethyl]-2,5-piperazinedione	262.08	12.352	C10H18N2O2S2	148529	#N/A	QP
1220	FALSE	3,6-Bis[2-(methylthio)ethyl]-2,5-piperazinedione@12.348-QP	3,6-Bis[2-(methylthio)ethyl]-2,5-piperazinedione	262.081	12.348	C10H18N2O2S2	148529	#N/A	QP
1221	FALSE	N-Acetyl-5-hydroxy-L-tryptophan@2.92-QP	N-Acetyl-5-hydroxy-L-tryptophan	262.095	2.92	C13H14N2O4	114097	#N/A	QP
1222	FALSE	262.10179@1.424-QP	#N/A	262.102	1.424	C7H14N6O5	#N/A	#N/A	QP
1223	FALSE	Methohexital@6.225-QP	Methohexital	262.131	6.225	C14H18N2O3	8683	#N/A	QP
1224	FALSE	8-Cyclohexyl-1,3-dimethyl-3,7-dihydro-1H-purine-2,6-dione@7.596-QP	8-Cyclohexyl-1,3-dimethyl-3,7-dihydro-1H-purine-2,6-dione	262.142	7.596	C13H18N4O2	195779	#N/A	QP
1225	FALSE	11-Phenylundecanoicacid@15.929-QP	11-Phenylundecanoicacid	262.192	15.929	C17H26O2	69314	#N/A	QP
1226	FALSE	11-Phenylundecanoicacid@12.962-QP	11-Phenylundecanoicacid	262.192	12.962	C17H26O2	69314	#N/A	QP
1227	FALSE	1913256@20.161-QP	1913256	262.228	20.161	C18H30O	12368	#N/A	QP
1228	FALSE	1913256@17.011-QP	1913256	262.229	17.011	C18H30O	12368	#N/A	QP
1229	FALSE	EMDP@11.353-QP	EMDP	263.166	11.353	C19H21N	#N/A	Drug metabolism - cytochrome P450	QP
1230	FALSE	Tramadol@7.951-QP	Tramadol	263.188	7.951	C16H25NO2	5322	Other	QP
1231	FALSE	Tramadol@7.203-QP	Tramadol	263.188	7.203	C16H25NO2	5322	Other	QP
1232	FALSE	Tramadol@8.804-QP	Tramadol	263.188	8.804	C16H25NO2	5322	Other	QP
1233	FALSE	Oleonitrile@14.841-QP	Oleonitrile	263.26	14.841	C18H33N	4925796	#N/A	QP
1234	FALSE	263.62642@12.327-QP	#N/A	263.626	12.327	#N/A	#N/A	#N/A	QP
1235	FALSE	264.02983@1.975-QP	#N/A	264.03	1.975	C4H9N8O2PS	#N/A	#N/A	QP
1236	FALSE	264.05174@1.334-QP	#N/A	264.052	1.334	C7H12N4O5S	#N/A	#N/A	QP
1237	FALSE	264.05177@1.174-QP	#N/A	264.052	1.174	C7H12N4O5S	#N/A	#N/A	QP
1238	FALSE	264.05464@3.633-QP	#N/A	264.055	3.633	C13H13O4P	#N/A	#N/A	QP
1239	FALSE	264.06068@9.126-QP	#N/A	264.061	9.126	C10H19O2P3	#N/A	#N/A	QP
1240	FALSE	N-Phenylacetylglutamine@6.481-QP	N-Phenylacetylglutamine	264.11	6.481	C13H16N2O4	#N/A	Phenylalanine metabolism;Other	QP
1241	FALSE	264.1346@12.271-QP	#N/A	264.135	12.271	C11H16N6O2	#N/A	#N/A	QP
1242	FALSE	264.13485@16.18-QP	#N/A	264.135	16.18	C11H16N6O2	#N/A	#N/A	QP
1243	FALSE	MFCD27967839@11.786-QP	MFCD27967839	264.151	11.786	C19H20O	4475890	#N/A	QP
1244	FALSE	Mianserin@10.318-QP	Mianserin	264.162	10.318	C18H20N2	4040	#N/A	QP
1245	FALSE	linolenylalcohol@21.086-QP	linolenylalcohol	264.244	21.086	C18H32O	4940757	#N/A	QP
1246	FALSE	264.63417@13.698-QP	#N/A	264.634	13.698	#N/A	#N/A	#N/A	QP
1247	FALSE	264.63487@13.097-QP	#N/A	264.635	13.097	#N/A	#N/A	#N/A	QP
1248	FALSE	Methyl(2E)-3-(2-bromophenyl)-2-cyanoacrylate@7.418-QP	Methyl(2E)-3-(2-bromophenyl)-2-cyanoacrylate	264.974	7.418	C11H8BrNO2	587110	#N/A	QP
1249	FALSE	265.0028@4.741-QP	#N/A	265.003	4.741	C7H5N7OP2	#N/A	#N/A	QP
1250	FALSE	Oxprenolol@6.294-QP	Oxprenolol	265.168	6.294	C15H23NO3	4470	#N/A	QP
1251	FALSE	265.981@7.91-QP	#N/A	265.981	7.91	C10H6N2O3S2	#N/A	#N/A	QP
1252	FALSE	265.99437@1.665-QP	#N/A	265.994	1.665	C4H10O11S	#N/A	#N/A	QP
1253	FALSE	266.05047@1.339-QP	#N/A	266.05	1.339	C8H17N2O2P3	#N/A	#N/A	QP
1254	FALSE	266.05058@1.633-QP	#N/A	266.051	1.633	C8H17N2O2P3	#N/A	#N/A	QP
1255	FALSE	6,6'-(1,4-Phenylene)dipyridazin-3(2H)-one@10.729-QP	6,6'-(1,4-Phenylene)dipyridazin-3(2H)-one	266.079	10.729	C14H10N4O2	129734	#N/A	QP
1256	FALSE	266.09883@1.633-QP	#N/A	266.099	1.633	C8H21N4P3	#N/A	#N/A	QP
1257	FALSE	alpha-bradyrhizose@5.551-QP	alpha-bradyrhizose	266.099	5.551	C10H18O8	58827518	#N/A	QP
1258	FALSE	266.11424@14.308-QP	#N/A	266.114	14.308	C8H19N4O4P	#N/A	#N/A	QP
1259	FALSE	Z-ORN-OH@1.701-QP	Z-ORN-OH	266.126	1.701	C13H18N2O4	5374056	Metabolic pathways;Biosynthesis of cofactors;Other	QP
1260	FALSE	Xanthoxicacid@13.969-QP	Xanthoxicacid	266.15	13.969	C15H22O4	9528908	Other	QP
1261	FALSE	Dodecylsulfate@16.45-QP	Dodecylsulfate	266.154	16.45	C12H26O4S	#N/A	#N/A	QP
1262	FALSE	DL-Atenolol@4.806-QP	DL-Atenolol	266.162	4.806	C14H22N2O3	2162	#N/A	QP
1263	FALSE	266.18663@14.465-QP	#N/A	266.187	14.465	C12H22N6O	#N/A	#N/A	QP
1264	FALSE	N~2~,N~2~,N~4~,N~4~,N~6~-Pentaethyl-1,3,5-triazine-2,4,6-triamine@19.521-QP	N~2~,N~2~,N~4~,N~4~,N~6~-Pentaethyl-1,3,5-triazine-2,4,6-triamine	266.223	19.521	C13H26N6	13828658	#N/A	QP
1265	FALSE	267.02046@13.629-QP	#N/A	267.02	13.629	C13H11Cl2NO	#N/A	#N/A	QP
1266	FALSE	267.02969@9.516-QP	#N/A	267.03	9.516	C6H7N9P2	#N/A	#N/A	QP
1267	FALSE	267.05298@7.91-QP	#N/A	267.053	7.91	C9H20NP3S	#N/A	#N/A	QP
1268	FALSE	N-(2-Benzyl-3-sulfanylpropanoyl)-beta-alanine@10.551-QP	N-(2-Benzyl-3-sulfanylpropanoyl)-beta-alanine	267.092	10.551	C13H17NO3S	110305	#N/A	QP
1269	FALSE	DDC@6.439-QP	DDC	267.146	6.439	C14H21NO4	11938	#N/A	QP
1270	FALSE	Metoprolol@8.027-QP	Metoprolol	267.182	8.027	C15H25NO3	4027	#N/A	QP
1271	FALSE	267.8099@1.009-QP	#N/A	267.81	1.009	#N/A	#N/A	#N/A	QP
1272	FALSE	267.95221@1.669-QP	#N/A	267.952	1.669	CHN8O5PS	#N/A	#N/A	QP
1273	FALSE	[Hydroxy(phenyl)methylene]bis(phosphonicacid)@0.891-QP	[Hydroxy(phenyl)methylene]bis(phosphonicacid)	267.99	0.891	C7H10O7P2	19981206	#N/A	QP
1274	FALSE	268.03721@7.195-QP	#N/A	268.037	7.195	C8H14ClN2O4P	#N/A	Biosynthesis of secondary metabolites;Biosynthesis of phenylpropanoids;Other	QP
1275	FALSE	268.07288@5.011-QP	#N/A	268.073	5.011	C9H12N6O2S	#N/A	Biosynthesis of secondary metabolites;Biosynthesis of phenylpropanoids;Other	QP
1276	FALSE	Inosine@2.314-QP	Inosine	268.08	2.314	C10H12N4O5	#N/A	Metabolic pathways;ABC transporters;Other	QP
1277	FALSE	Ambrettemusk@1.529-QP	Ambrettemusk	268.105	1.529	C12H16N2O5	6496	#N/A	QP
1278	FALSE	268.11473@1.381-QP	#N/A	268.115	1.381	C10H20O8	#N/A	#N/A	QP
1279	FALSE	Acetylcarnosine@1.359-QP	Acetylcarnosine	268.116	1.359	C11H16N4O4	8079136	#N/A	QP
1280	FALSE	2-(2-Carboxyethyl)-4-methyl-5-pentyl-3-furoicacid@14.299-QP	2-(2-Carboxyethyl)-4-methyl-5-pentyl-3-furoicacid	268.13	14.299	C14H20O5	4476406	#N/A	QP
1281	FALSE	268.20246@16.563-QP	#N/A	268.202	16.563	C12H24N6O	#N/A	#N/A	QP
1282	FALSE	trans-10-HeptadecenoicAcid@20.372-QP	trans-10-HeptadecenoicAcid	268.239	20.372	C17H32O2	#N/A	#N/A	QP
1283	FALSE	268.97389@7.665-QP	#N/A	268.974	7.665	C8H3N3O6S	#N/A	#N/A	QP
1284	FALSE	269.08586@1.592-QP	#N/A	269.086	1.592	C11H17N3OP2	#N/A	#N/A	QP
1285	FALSE	269.8073@1.023-QP	#N/A	269.807	1.023	#N/A	#N/A	#N/A	QP
1286	FALSE	270.01854@11.255-QP	#N/A	270.019	11.255	C11H10O6S	#N/A	#N/A	QP
1287	FALSE	Nordazepam@14.287-QP	Nordazepam	270.055	14.287	C15H11ClN2O	2890	#N/A	QP
1288	FALSE	Nordiazepam@12.814-QP	Nordiazepam	270.055	12.814	C15H11ClN2O	#N/A	#N/A	QP
1289	FALSE	S-hydroxyphenylacetothiohydroximoylcysteine@3.361-QP	S-hydroxyphenylacetothiohydroximoylcysteine	270.066	3.361	C11H14N2O4S	#N/A	2-Oxocarboxylic acid metabolism;Glucosinolate biosynthesis	QP
1290	FALSE	270.07083@7.866-QP	#N/A	270.071	7.866	C7H14N2O9	#N/A	#N/A	QP
1291	FALSE	270.07103@8.322-QP	#N/A	270.071	8.322	C9H21O3P3	#N/A	#N/A	QP
1292	FALSE	vinyluridine@3.241-QP	vinyluridine	270.084	3.241	C11H14N2O6	9747860	#N/A	QP
1293	FALSE	270.09379@1.199-QP	#N/A	270.094	1.199	C7H21N4OP3	#N/A	#N/A	QP
1294	FALSE	Dihydroxycarbazepine@8.967-QP	Dihydroxycarbazepine	270.099	8.967	C15H14N2O3	75667	Drug metabolism - cytochrome P450	QP
1295	FALSE	3543@14.339-QP	3543	270.182	14.339	C15H26O4	54974	Other	QP
1296	FALSE	Androstadienone@13.314-QP	Androstadienone	270.197	13.314	C19H26O	83932	#N/A	QP
1297	FALSE	Androstadienone@14.264-QP	Androstadienone	270.197	14.264	C19H26O	83932	#N/A	QP
1298	FALSE	Androstadienone@12.19-QP	Androstadienone	270.197	12.19	C19H26O	83932	#N/A	QP
1299	FALSE	270.21809@17.359-QP	#N/A	270.218	17.359	C12H26N6O	#N/A	#N/A	QP
1300	FALSE	1,1'-Biadamantane@14.582-QP	1,1'-Biadamantane	270.234	14.582	C20H30	121671	Biosynthesis of secondary metabolites;Other	QP
1301	FALSE	270.95671@1.005-QP	#N/A	270.957	1.005	C6H8ClNO5P2	#N/A	#N/A	QP
1302	FALSE	271.05641@1.467-QP	#N/A	271.056	1.467	C6H14N3O7P	#N/A	#N/A	QP
1303	FALSE	4-(2-furanylmethyl)-3-(phenylmethyl)-1H-1,2,4-triazole-5-thione@9.842-QP	4-(2-furanylmethyl)-3-(phenylmethyl)-1H-1,2,4-triazole-5-thione	271.077	9.842	C14H13N3OS	778936	#N/A	QP
1304	FALSE	4-(2-furanylmethyl)-3-(phenylmethyl)-1H-1,2,4-triazole-5-thione@9.192-QP	4-(2-furanylmethyl)-3-(phenylmethyl)-1H-1,2,4-triazole-5-thione	271.077	9.192	C14H13N3OS	778936	#N/A	QP
1305	FALSE	4-(2-furanylmethyl)-3-(phenylmethyl)-1H-1,2,4-triazole-5-thione@8.389-QP	4-(2-furanylmethyl)-3-(phenylmethyl)-1H-1,2,4-triazole-5-thione	271.077	8.389	C14H13N3OS	778936	#N/A	QP
1306	FALSE	271.08113@10.737-QP	#N/A	271.081	10.737	C12H20NP3	#N/A	#N/A	QP
1307	FALSE	PHA-543,613@9.898-QP	PHA-543,613	271.131	9.898	C15H17N3O2	8105752	#N/A	QP
1308	FALSE	PHA-543,613@8.881-QP	PHA-543,613	271.131	8.881	C15H17N3O2	8105752	#N/A	QP
1309	FALSE	271.78639@0.999-QP	#N/A	271.786	0.999	#N/A	#N/A	#N/A	QP
1310	FALSE	271.96064@10.792-QP	#N/A	271.961	10.792	C8H11Cl2O2PS	#N/A	#N/A	QP
1311	FALSE	271.96628@1.218-QP	#N/A	271.966	1.218	C7H10ClO5PS	#N/A	#N/A	QP
1312	FALSE	2-hydroxydihydrodaidzein@9.689-QP	2-hydroxydihydrodaidzein	272.068	9.689	C15H12O5	#N/A	Metabolic pathways;Biosynthesis of secondary metabolites;Biosynthesis of phenylpropanoids;Other	QP
1313	FALSE	272.07148@0.905-QP	#N/A	272.071	0.905	C4H12N6O8	#N/A	#N/A	QP
1314	FALSE	272.07588@2.191-QP	#N/A	272.076	2.191	C9H12N4O6	#N/A	#N/A	QP
1315	FALSE	Sotalol@3.189-QP	Sotalol	272.119	3.189	C12H20N2O3S	5063	#N/A	QP
1316	FALSE	Glycyl-N-(5-carbamimidamido-1-oxo-2-pentanyl)glycinamide@12.12-QP	Glycyl-N-(5-carbamimidamido-1-oxo-2-pentanyl)glycinamide	272.161	12.12	C10H20N6O3	19983636	#N/A	QP
1317	FALSE	272.18382@1.162-QP	#N/A	272.184	1.162	C12H24N4O3	#N/A	#N/A	QP
1318	FALSE	272.19734@15.467-QP	#N/A	272.197	15.467	C11H24N6O2	#N/A	#N/A	QP
1319	FALSE	272.19734@15.661-QP	#N/A	272.197	15.661	C11H24N6O2	#N/A	#N/A	QP
1320	FALSE	Junipericacid@16.76-QP	Junipericacid	272.234	16.76	C16H32O3	10034	Metabolic pathways;Other	QP
1321	FALSE	272.23385@16.975-QP	#N/A	272.234	16.975	C12H28N6O	#N/A	#N/A	QP
1322	FALSE	272.23395@18.355-QP	#N/A	272.234	18.355	C12H28N6O	#N/A	#N/A	QP
1323	FALSE	16-hydroxypalmiticacid@17.344-QP	16-hydroxypalmiticacid	272.234	17.344	C16H32O3	#N/A	Metabolic pathways;Other	QP
1324	FALSE	1-{[5-(2-Hydroxyethoxy)-4-oxopentanoyl]oxy}-2,5-pyrrolidinedione@12.25-QP	1-{[5-(2-Hydroxyethoxy)-4-oxopentanoyl]oxy}-2,5-pyrrolidinedione	273.084	12.25	C11H15NO7	113046	#N/A	QP
1325	FALSE	9-acridinecarbonylimidazole@7.928-QP	9-acridinecarbonylimidazole	273.09	7.928	C17H11N3O	16388484	#N/A	QP
1326	FALSE	273.15646@11.079-QP	#N/A	273.156	11.079	C13H23NO5	#N/A	#N/A	QP
1327	FALSE	Ferulicacid4-sulfate@7.958-QP	Ferulicacid4-sulfate	274.014	7.958	C10H10O7S	4878542	#N/A	QP
1328	FALSE	4-Hydroxy-5-(phenyl)-valericacid-O-sulphate@9.68-QP	4-Hydroxy-5-(phenyl)-valericacid-O-sulphate	274.05	9.68	C11H14O6S	10217506	#N/A	QP
1329	FALSE	4-Hydroxy-5-(phenyl)-valericacid-O-sulphate@9.946-QP	4-Hydroxy-5-(phenyl)-valericacid-O-sulphate	274.051	9.946	C11H14O6S	10217506	#N/A	QP
1330	FALSE	274.10188@5.691-QP	#N/A	274.102	5.691	C7H18N2O9	#N/A	#N/A	QP
1331	FALSE	EthylN-acetyl-L-tryptophanate@9.689-QP	EthylN-acetyl-L-tryptophanate	274.131	9.689	C15H18N2O3	2006529	#N/A	QP
1332	FALSE	EthylN-acetyl-L-tryptophanate@9.889-QP	EthylN-acetyl-L-tryptophanate	274.131	9.889	C15H18N2O3	2006529	#N/A	QP
1333	FALSE	274.17659@12.694-QP	#N/A	274.177	12.694	C18H26S	#N/A	#N/A	QP
1334	FALSE	N,N'-Bis(3-aminopropyl)-1,8-naphthyridine-2,7-diamine@16.348-QP	N,N'-Bis(3-aminopropyl)-1,8-naphthyridine-2,7-diamine	274.192	16.348	C14H22N6	461895	#N/A	QP
1335	FALSE	275.00864@3.492-QP	#N/A	275.009	3.492	C13H11NP2S	#N/A	#N/A	QP
1336	FALSE	Gamma-glutamylglutamine@1.075-QP	Gamma-glutamylglutamine	275.111	1.075	C10H17N3O6	#N/A	#N/A	QP
1337	FALSE	275.1184@7.198-QP	#N/A	275.118	7.198	C15H18ClN3	#N/A	#N/A	QP
1338	FALSE	3-Hydroxy-6-methyl-4-({[(2-methyl-2-propanyl)oxy]carbonyl}amino)heptanoicacid@3.537-QP	3-Hydroxy-6-methyl-4-({[(2-methyl-2-propanyl)oxy]carbonyl}amino)heptanoicacid	275.173	3.537	C13H25NO5	3591723	#N/A	QP
1339	FALSE	GW9662@13.288-QP	GW9662	276.029	13.288	C13H9ClN2O3	559235	#N/A	QP
1340	FALSE	3-[3-Methoxy-4-(sulfooxy)phenyl]propanoicacid@10.743-QP	3-[3-Methoxy-4-(sulfooxy)phenyl]propanoicacid	276.029	10.743	C10H12O7S	162994	#N/A	QP
1341	FALSE	3-[3-Methoxy-4-(sulfooxy)phenyl]propanoicacid@7.157-QP	3-[3-Methoxy-4-(sulfooxy)phenyl]propanoicacid	276.03	7.157	C10H12O7S	162994	#N/A	QP
1342	FALSE	Gamma-glutamylglutamicacid@1.181-QP	Gamma-glutamylglutamicacid	276.095	1.181	C10H16N2O7	#N/A	Other	QP
1343	FALSE	276.12158@6.49-QP	#N/A	276.122	6.49	C13H16N4O3	#N/A	#N/A	QP
1344	FALSE	Stearidonicacid@17.026-QP	Stearidonicacid	276.208	17.026	C18H28O2	4471933	Biosynthesis of secondary metabolites;Other	QP
1345	FALSE	Stearidonicacid@18.73-QP	Stearidonicacid	276.208	18.73	C18H28O2	4471933	Biosynthesis of secondary metabolites;Other	QP
1346	FALSE	277.00647@7.187-QP	#N/A	277.006	7.187	C12H9NO3P2	#N/A	#N/A	QP
1347	FALSE	EDDP@11.533-QP	EDDP	277.182	11.533	C20H23N	#N/A	Drug metabolism - cytochrome P450	QP
1348	FALSE	EDDP@11.004-QP	EDDP	277.182	11.004	C20H23N	#N/A	Drug metabolism - cytochrome P450	QP
1349	FALSE	Venlafaxine@9.01-QP	Venlafaxine	277.203	9.01	C17H27NO2	5454	#N/A	QP
1350	FALSE	277.54326@1.545-QP	#N/A	277.543	1.545	#N/A	#N/A	#N/A	QP
1351	FALSE	277.86005@0.961-QP	#N/A	277.86	0.961	C3H6BrClN2P2S	#N/A	#N/A	QP
1352	FALSE	278.00783@8.521-QP	#N/A	278.008	8.521	C7H13N4P3S	#N/A	#N/A	QP
1353	FALSE	Alcoifosfamide@7.776-QP	Alcoifosfamide	278.035	7.776	C7H17Cl2N2O3P	8441068	Drug metabolism - cytochrome P450	QP
1354	FALSE	exifone@1.545-QP	exifone	278.044	1.545	C13H10O7	36906	#N/A	QP
1355	FALSE	278.07509@12.363-QP	#N/A	278.075	12.363	C13H16N2OP2	#N/A	Metabolic pathways;Biosynthesis of secondary metabolites;Other	QP
1356	FALSE	278.07549@8.959-QP	#N/A	278.075	8.959	C10H10N6O4	#N/A	Metabolic pathways;Biosynthesis of secondary metabolites;Other	QP
1357	FALSE	EthylL-gamma-glutamyl-L-cysteinate@1.832-QP	EthylL-gamma-glutamyl-L-cysteinate	278.093	1.832	C10H18N2O5S	106601	#N/A	QP
1358	FALSE	Raxofelast@11.313-QP	Raxofelast	278.114	11.313	C15H18O5	59364	Metabolic pathways;Biosynthesis of secondary metabolites;Other	QP
1359	FALSE	278.1479@14.066-QP	#N/A	278.148	14.066	C12H18N6O2	#N/A	#N/A	QP
1360	FALSE	278.15016@17.541-QP	#N/A	278.15	17.541	C12H18N6O2	#N/A	#N/A	QP
1361	FALSE	ile-phe@7.329-QP	ile-phe	278.162	7.329	C15H22N2O3	5373175	#N/A	QP
1362	FALSE	278.18338@1.049-QP	#N/A	278.183	1.049	C14H31OPS	#N/A	#N/A	QP
1363	FALSE	?-Eleostearicacid@19.409-QP	?-Eleostearicacid	278.223	19.409	C18H30O2	#N/A	Metabolic pathways;Biosynthesis of secondary metabolites;Biosynthesis of plant secondary metabolites;Biosynthesis of unsaturated fatty acids;Other	QP
1364	FALSE	278.22327@17.127-QP	#N/A	278.223	17.127	C14H26N6	#N/A	Metabolic pathways;Biosynthesis of secondary metabolites;Biosynthesis of plant secondary metabolites;Biosynthesis of unsaturated fatty acids;Other	QP
1365	FALSE	279.08387@0.978-QP	#N/A	279.084	0.978	C6H14N7O4P	#N/A	#N/A	QP
1366	FALSE	Phe-Gly-Gly@2.215-QP	Phe-Gly-Gly	279.121	2.215	C13H17N3O4	134538	#N/A	QP
1367	FALSE	Metalaxyl@6.397-QP	Metalaxyl	279.146	6.397	C15H21NO4	38839	#N/A	QP
1368	FALSE	Moxisylyte@6.186-QP	Moxisylyte	279.183	6.186	C16H25NO3	4110	#N/A	QP
1369	FALSE	Moxisylyte@8.251-QP	Moxisylyte	279.183	8.251	C16H25NO3	4110	#N/A	QP
1370	FALSE	Linoleamide@16.993-QP	Linoleamide	279.255	16.993	C18H33NO	4940587	#N/A	QP
1371	FALSE	279.64618@17.206-QP	#N/A	279.646	17.206	#N/A	#N/A	#N/A	QP
1372	FALSE	280.0449@1.609-QP	#N/A	280.045	1.609	C9H13ClN2O6	#N/A	#N/A	QP
1373	FALSE	280.06585@1.402-QP	#N/A	280.066	1.402	C9H19N2O2P3	#N/A	#N/A	QP
1374	FALSE	280.08138@13.154-QP	#N/A	280.081	13.154	C12H8N8O	#N/A	#N/A	QP
1375	FALSE	TIK-301@8.269-QP	TIK-301	280.097	8.269	C14H17ClN2O2	7985499	#N/A	QP
1376	FALSE	280.10446@7.499-QP	#N/A	280.104	7.499	C15H21OPS	#N/A	#N/A	QP
1377	FALSE	280.10485@4.419-QP	#N/A	280.105	4.419	C15H21OPS	#N/A	#N/A	QP
1378	FALSE	?-Aspartylphenylalanine@2.899-QP	?-Aspartylphenylalanine	280.105	2.899	C13H16N2O5	#N/A	#N/A	QP
1379	FALSE	280.13286@12.697-QP	#N/A	280.133	12.697	C16H24S2	#N/A	Other	QP
1380	FALSE	280.16334@14.83-QP	#N/A	280.163	14.83	C11H24N2O6	#N/A	#N/A	QP
1381	FALSE	4,4'-butane-1,4-diylbis(3-ethyl-1H-1,2,4-triazol-5(4H)-one)@16.626-QP	4,4'-butane-1,4-diylbis(3-ethyl-1H-1,2,4-triazol-5(4H)-one)	280.163	16.626	C12H20N6O2	4446841	#N/A	QP
1382	FALSE	280.1634@16.94-QP	#N/A	280.163	16.94	C13H29O2PS	#N/A	#N/A	QP
1383	FALSE	280.20237@15.929-QP	#N/A	280.202	15.929	C13H24N6O	#N/A	#N/A	QP
1384	FALSE	LinoleicAcid@17.283-QP	LinoleicAcid	280.239	17.283	C18H32O2	#N/A	#N/A	QP
1385	FALSE	Linoleicacid@20.161-QP	Linoleicacid	280.239	20.161	C18H32O2	4444105	#N/A	QP
1386	FALSE	280.23895@17.559-QP	#N/A	280.239	17.559	C14H28N6	#N/A	#N/A	QP
1387	FALSE	9,11-octadecadienoicacid@23.434-QP	9,11-octadecadienoicacid	280.239	23.434	C18H32O2	#N/A	Metabolic pathways;Biosynthesis of plant secondary metabolites;Biosynthesis of unsaturated fatty acids;Other	QP
1388	FALSE	280.91371@1.291-QP	#N/A	280.914	1.291	C6HClNO8P	#N/A	#N/A	QP
1389	FALSE	N1-methyladenosine@1.359-QP	N1-methyladenosine	281.111	1.359	C11H15N5O4	#N/A	#N/A	QP
1390	FALSE	(9Z)-9-Octadecenamide@20.685-QP	(9Z)-9-Octadecenamide	281.271	20.685	C18H35NO	4446508	#N/A	QP
1391	FALSE	(9Z)-9-Octadecenamide@14.849-QP	(9Z)-9-Octadecenamide	281.271	14.849	C18H35NO	4446508	#N/A	QP
1392	FALSE	2,2'-dithiodiethanesulfonicacid@1.641-QP	2,2'-dithiodiethanesulfonicacid	281.935	1.641	C4H10O6S4	59067	#N/A	QP
1393	FALSE	281.96773@1.673-QP	#N/A	281.968	1.673	C9H3N2O7P	#N/A	#N/A	QP
1394	FALSE	281.98445@0.906-QP	#N/A	281.984	0.906	C4H12ClN2O6PS	#N/A	#N/A	QP
1395	FALSE	281.98547@0.902-QP	#N/A	281.985	0.902	C4H12ClN2O6PS	#N/A	#N/A	QP
1396	FALSE	2-Aminoadenosine@2.981-QP	2-Aminoadenosine	282.106	2.981	C10H14N6O4	65171	#N/A	QP
1397	FALSE	282.1122@11.473-QP	#N/A	282.112	11.473	C7H18N6O4S	#N/A	Other	QP
1398	FALSE	282.14517@16.179-QP	#N/A	282.145	16.179	C11H18N6O3	#N/A	Other	QP
1399	FALSE	BIS-TRISPROPANE@17.545-QP	BIS-TRISPROPANE	282.179	17.545	C11H26N2O6	111383	#N/A	QP
1400	FALSE	282.23344@13.986-QP	#N/A	282.233	13.986	#N/A	#N/A	#N/A	QP
1401	FALSE	282.24519@20.287-QP	#N/A	282.245	20.287	#N/A	#N/A	#N/A	QP
1402	FALSE	Oleicacid@21.086-QP	Oleicacid	282.254	21.086	C18H34O2	393217	Biosynthesis of plant secondary metabolites;Biosynthesis of unsaturated fatty acids;Other	QP
1403	FALSE	trans-Petroselinicacid@17.902-QP	trans-Petroselinicacid	282.254	17.902	C18H34O2	#N/A	Biosynthesis of plant secondary metabolites;Biosynthesis of unsaturated fatty acids;Other	QP
1404	FALSE	trans-Petroselinicacid@18.138-QP	trans-Petroselinicacid	282.255	18.138	C18H34O2	#N/A	Biosynthesis of plant secondary metabolites;Biosynthesis of unsaturated fatty acids;Other	QP
1405	FALSE	Risedronicacid@0.936-QP	Risedronicacid	283.001	0.936	C7H11NO7P2	5055	#N/A	QP
1406	FALSE	283.0114@1.526-QP	#N/A	283.011	1.526	C8H16NO2P3S	#N/A	#N/A	QP
1407	FALSE	Guanosine@2.483-QP	Guanosine	283.09	2.483	C10H13N5O5	6544	Metabolic pathways;ABC transporters;Other	QP
1408	FALSE	Guanosine@2.487-QP	Guanosine	283.092	2.487	C10H13N5O5	6544	Metabolic pathways;ABC transporters;Other	QP
1409	FALSE	Morphinone@15.878-QP	Morphinone	283.12	15.878	C17H17NO3	#N/A	Biosynthesis of secondary metabolites;Other	QP
1410	FALSE	283.7834@1.002-QP	#N/A	283.783	1.002	C2H4Br2ClPS	#N/A	#N/A	QP
1411	FALSE	283.964@0.895-QP	#N/A	283.964	0.895	C9H5N2O5PS	#N/A	#N/A	QP
1412	FALSE	283.99114@7.91-QP	#N/A	283.991	7.91	C6H4N8O2S2	#N/A	#N/A	QP
1413	FALSE	284.03427@0.878-QP	#N/A	284.034	0.878	C4H8N6O9	#N/A	#N/A	QP
1414	FALSE	284.06206@12.361-QP	#N/A	284.062	12.361	C15H14N2P2	#N/A	#N/A	QP
1415	FALSE	284.07393@3.061-QP	#N/A	284.074	3.061	C9H16O10	#N/A	#N/A	QP
1416	FALSE	Xanthosine@3.559-QP	Xanthosine	284.075	3.559	C10H12N4O6	58484	Metabolic pathways;Biosynthesis of secondary metabolites;ABC transporters;Other	QP
1417	FALSE	4-Bromo-2,6-di-tert-butylphenol@18.887-QP	4-Bromo-2,6-di-tert-butylphenol	284.076	18.887	C14H21BrO	63993	Metabolic pathways;Biosynthesis of secondary metabolites;ABC transporters;Other	QP
1418	FALSE	284.08816@6.517-QP	#N/A	284.088	6.517	C17H18P2	#N/A	#N/A	QP
1419	FALSE	284.10927@1.546-QP	#N/A	284.109	1.546	C14H22O2P2	#N/A	#N/A	QP
1420	FALSE	UNII:CD9T07H2IZ@10.576-QP	UNII:CD9T07H2IZ	284.125	10.576	C14H20O6	20356	#N/A	QP
1421	FALSE	Androsta-1,4-diene-3,17-dione@13.561-QP	Androsta-1,4-diene-3,17-dione	284.177	13.561	C19H24O2	#N/A	Metabolic pathways;Microbial metabolism in diverse environments;Other	QP
1422	FALSE	DODECENYLSUCCINICACID@15.586-QP	DODECENYLSUCCINICACID	284.197	15.586	C16H28O4	4576472	Other	QP
1423	FALSE	284.23388@18.103-QP	#N/A	284.234	18.103	C13H28N6O	#N/A	#N/A	QP
1424	FALSE	284.24862@20.084-QP	#N/A	284.249	20.084	#N/A	#N/A	#N/A	QP
1425	FALSE	Pregna-1,4-diene@13.58-QP	Pregna-1,4-diene	284.249	13.58	C21H32	18524420	#N/A	QP
1426	FALSE	Stearicacid@22.229-QP	Stearicacid	284.27	22.229	C18H36O2	5091	Biosynthesis of plant secondary metabolites;Biosynthesis of unsaturated fatty acids;Other	QP
1427	FALSE	284.8947@1.008-QP	#N/A	284.895	1.008	CH2Cl2N3O8P	#N/A	#N/A	QP
1428	FALSE	284.95109@1.019-QP	#N/A	284.951	1.019	C3H10Cl2N3O4PS	#N/A	#N/A	QP
1429	FALSE	285.09132@8.894-QP	#N/A	285.091	8.894	C16H16NO2P	#N/A	#N/A	QP
1430	FALSE	MFCD00274633@13.283-QP	MFCD00274633	285.1	13.283	C16H15NO4	2043006	#N/A	QP
1431	FALSE	285.11703@1.575-QP	#N/A	285.117	1.575	C12H21N3OP2	#N/A	#N/A	QP
1432	FALSE	N-(8-carboxy-3-oxooctanoyl)-L-homoserinelactone@2.02-QP	N-(8-carboxy-3-oxooctanoyl)-L-homoserinelactone	285.12	2.02	C13H19NO6	26333024	#N/A	QP
1433	FALSE	HCblue2@1.258-QP	HCblue2	285.132	1.258	C12H19N3O5	33439	#N/A	QP
1434	FALSE	Piperine@15.208-QP	Piperine	285.135	15.208	C17H19NO3	553590	Metabolic pathways;Biosynthesis of secondary metabolites;Biosynthesis of alkaloids derived from shikimate pathway;Drug metabolism - cytochrome P450;Biosynthesis of alkaloids derived from ornithine, lysine and nicotinic acid;Tropane, piperidine and pyridine alkaloid biosynthesis;Other	QP
1435	FALSE	Morphine@2.369-QP	Morphine	285.135	2.369	C17H19NO3	#N/A	Metabolic pathways;Biosynthesis of secondary metabolites;Biosynthesis of alkaloids derived from shikimate pathway;Drug metabolism - cytochrome P450;Biosynthesis of alkaloids derived from ornithine, lysine and nicotinic acid;Tropane, piperidine and pyridine alkaloid biosynthesis;Other	QP
1436	FALSE	CarnitineC8:1@8.957-QP	CarnitineC8:1	285.193	8.957	C15H27NO4	#N/A	#N/A	QP
1437	FALSE	1794967@17.425-QP	1794967	285.229	17.425	C16H31NO3	65286	#N/A	QP
1438	FALSE	285.78087@1-QP	#N/A	285.781	1	C2HCl2PS5	#N/A	#N/A	QP
1439	FALSE	286.01654@11.785-QP	#N/A	286.017	11.785	C12H12ClO4P	#N/A	#N/A	QP
1440	FALSE	Oxazepam@11.936-QP	Oxazepam	286.05	11.936	C15H11ClN2O2	4455	#N/A	QP
1441	FALSE	286.06697@1.638-QP	#N/A	286.067	1.638	C8H10N6O6	#N/A	#N/A	QP
1442	FALSE	286.06709@3.385-QP	#N/A	286.067	3.385	C8H20N2O3P2S	#N/A	#N/A	QP
1443	FALSE	1-Deoxy-1-(2,6-dioxo-1,2,3,6-tetrahydro-9H-purin-9-yl)-D-ribitol@2.956-QP	1-Deoxy-1-(2,6-dioxo-1,2,3,6-tetrahydro-9H-purin-9-yl)-D-ribitol	286.092	2.956	C10H14N4O6	141182	#N/A	QP
1444	FALSE	286.09209@6.467-QP	#N/A	286.092	6.467	C11H10N8O2	#N/A	#N/A	QP
1445	FALSE	286.13832@15.162-QP	#N/A	286.138	15.162	C9H22N2O8	#N/A	#N/A	QP
1446	FALSE	N-(Cyclohexylmethyl)-5,6,7,8-tetrahydrotetrazolo[5,1-b]quinazolin-9-amine@14.476-QP	N-(Cyclohexylmethyl)-5,6,7,8-tetrahydrotetrazolo[5,1-b]quinazolin-9-amine	286.192	14.476	C15H22N6	389245	#N/A	QP
1447	FALSE	N-(Cyclohexylmethyl)-5,6,7,8-tetrahydrotetrazolo[5,1-b]quinazolin-9-amine@15.639-QP	N-(Cyclohexylmethyl)-5,6,7,8-tetrahydrotetrazolo[5,1-b]quinazolin-9-amine	286.192	15.639	C15H22N6	389245	#N/A	QP
1448	FALSE	5-androstene-3,17-dione@13.461-QP	5-androstene-3,17-dione	286.192	13.461	C19H26O2	#N/A	Metabolic pathways;Microbial metabolism in diverse environments;Other	QP
1449	FALSE	Hexadecanedioicacid@16.44-QP	Hexadecanedioicacid	286.213	16.44	C16H30O4	#N/A	Metabolic pathways;Other	QP
1450	FALSE	9-retinol@22.227-QP	9-retinol	286.228	22.227	C20H30O	#N/A	Metabolic pathways;Biosynthesis of secondary metabolites;Biosynthesis of cofactors;Other	QP
1451	FALSE	286.22853@19.158-QP	#N/A	286.229	19.158	C14H31N4P	#N/A	Metabolic pathways;Biosynthesis of secondary metabolites;Biosynthesis of cofactors;Other	QP
1452	FALSE	286.62422@16.338-QP	#N/A	286.624	16.338	#N/A	#N/A	#N/A	QP
1453	FALSE	286.64299@1.361-QP	#N/A	286.643	1.361	#N/A	#N/A	#N/A	QP
1454	FALSE	286.99101@7.397-QP	#N/A	286.991	7.397	C10H9NO5S2	#N/A	#N/A	QP
1455	FALSE	MFCD00068722@7.536-QP	MFCD00068722	287.126	7.536	C15H17N3O3	84509	#N/A	QP
1456	FALSE	Galanthamine@10.963-QP	Galanthamine	287.151	10.963	C17H21NO3	3331	Biosynthesis of secondary metabolites;Biosynthesis of alkaloids derived from shikimate pathway;Other	QP
1457	FALSE	CarnitineC8:0@10.132-QP	CarnitineC8:0	287.209	10.132	C15H29NO4	#N/A	#N/A	QP
1458	FALSE	287.63224@17.2-QP	#N/A	287.632	17.2	#N/A	#N/A	#N/A	QP
1459	FALSE	287.97615@1.674-QP	#N/A	287.976	1.674	C4H11N4O3P3S	#N/A	Other	QP
1460	FALSE	288.02888@7.781-QP	#N/A	288.029	7.781	C7H8N6O5S	#N/A	#N/A	QP
1461	FALSE	Phlorin@2.536-QP	Phlorin	288.084	2.536	C12H16O8	#N/A	#N/A	QP
1462	FALSE	288.12874@12.355-QP	#N/A	288.129	12.355	C8H16N8O4	#N/A	#N/A	QP
1463	FALSE	288.14245@8.919-QP	#N/A	288.142	8.919	C14H26O2P2	#N/A	#N/A	QP
1464	FALSE	288.14249@1.346-QP	#N/A	288.142	1.346	C13H25N2OPS	#N/A	#N/A	QP
1465	FALSE	Gly-Gly-Arg@7.588-QP	Gly-Gly-Arg	288.154	7.588	C10H20N6O4	289092	#N/A	QP
1466	FALSE	288.18981@1.059-QP	#N/A	288.19	1.059	C11H24N6O3	#N/A	#N/A	QP
1467	FALSE	5a-androstane-3,17-dione@14.264-QP	5a-androstane-3,17-dione	288.208	14.264	C19H28O2	#N/A	Metabolic pathways;Microbial metabolism in diverse environments;Other	QP
1468	FALSE	13,14-dihydroretinol@14.583-QP	13,14-dihydroretinol	288.244	14.583	C20H32O	#N/A	Metabolic pathways;Biosynthesis of secondary metabolites;Other	QP
1469	FALSE	Ophthalmicacid@1.573-QP	Ophthalmicacid	289.126	1.573	C11H19N3O6	#N/A	Metabolic pathways;Biosynthesis of secondary metabolites;Other	QP
1470	FALSE	3-methylglutarylcarnitine@4.4-QP	3-methylglutarylcarnitine	289.152	4.4	C13H23NO6	#N/A	#N/A	QP
1471	FALSE	3-methylglutarylcarnitine@2.652-QP	3-methylglutarylcarnitine	289.152	2.652	C13H23NO6	#N/A	#N/A	QP
1472	FALSE	289.78371@1.043-QP	#N/A	289.784	1.043	#N/A	#N/A	#N/A	QP
1473	FALSE	289.88249@1.413-QP	#N/A	289.882	1.413	C3H7Cl3O5P2	#N/A	#N/A	QP
1474	FALSE	290.04218@9.646-QP	#N/A	290.042	9.646	C10H7ClN8O	#N/A	#N/A	QP
1475	FALSE	290.04432@6.955-QP	#N/A	290.044	6.955	C15H14O2S2	#N/A	#N/A	QP
1476	FALSE	290.06056@1.118-QP	#N/A	290.061	1.118	C6H14N2O11	#N/A	#N/A	QP
1477	FALSE	290.06219@2.351-QP	#N/A	290.062	2.351	C7H10N6O7	#N/A	#N/A	QP
1478	FALSE	9-(2-Deoxy-4-ethynylpentofuranosyl)-9H-purine-2,6-diamine@14.299-QP	9-(2-Deoxy-4-ethynylpentofuranosyl)-9H-purine-2,6-diamine	290.112	14.299	C12H14N6O3	13461373	Metabolic pathways;Microbial metabolism in diverse environments;Biosynthesis of amino acids;Other	QP
1479	FALSE	Trimethoprim@7.14-QP	Trimethoprim	290.137	7.14	C14H18N4O3	5376	#N/A	QP
1480	FALSE	290.14035@14.766-QP	#N/A	290.14	14.766	#N/A	#N/A	#N/A	QP
1481	FALSE	D-617@9.645-QP	D-617	290.198	9.645	C17H26N2O2	84112	#N/A	QP
1482	FALSE	290.95023@1.846-QP	#N/A	290.95	1.846	C12H4Cl2N3P	#N/A	#N/A	QP
1483	FALSE	291.02849@7.047-QP	#N/A	291.028	7.047	C7H9N5O6S	#N/A	#N/A	QP
1484	FALSE	2-Hydroxy-1-naphthylaldehydeisonicotinoylhydrazone@7.93-QP	2-Hydroxy-1-naphthylaldehydeisonicotinoylhydrazone	291.101	7.93	C17H13N3O2	10943372	#N/A	QP
1485	FALSE	ala-asp-ser@1.832-QP	ala-asp-ser	291.107	1.832	C10H17N3O7	59653841	#N/A	QP
1486	FALSE	291.18965@1.041-QP	#N/A	291.19	1.041	C11H25N5O4	#N/A	#N/A	QP
1487	FALSE	291.85429@0.947-QP	#N/A	291.854	0.947	C3H6Cl4O3P2	#N/A	#N/A	QP
1488	FALSE	Carboxyifosfamide@7.406-QP	Carboxyifosfamide	292.014	7.406	C7H15Cl2N2O4P	110614	Drug metabolism - cytochrome P450	QP
1489	FALSE	292.02358@11.97-QP	#N/A	292.024	11.97	C15H14ClPS	#N/A	#N/A	QP
1490	FALSE	292.07643@2.388-QP	#N/A	292.076	2.388	C7H12N6O7	#N/A	#N/A	QP
1491	FALSE	Ethylenediaminetetraaceticacid@11.248-QP	Ethylenediaminetetraaceticacid	292.091	11.248	C10H16N2O8	5826	#N/A	QP
1492	FALSE	4-hydroxy-4-(indol-3-ylmethyl)glutamicacid@1.852-QP	4-hydroxy-4-(indol-3-ylmethyl)glutamicacid	292.105	1.852	C14H16N2O5	8101701	Metabolic pathways;Biosynthesis of secondary metabolites;Other	QP
1493	FALSE	292.16563@15.933-QP	#N/A	292.166	15.933	C13H20N6O2	#N/A	#N/A	QP
1494	FALSE	10-OPDA@16.35-QP	10-OPDA	292.203	16.35	C18H28O3	26332178	Metabolic pathways;Biosynthesis of secondary metabolites;Other	QP
1495	FALSE	292.23866@19.854-QP	#N/A	292.239	19.854	C15H28N6	#N/A	#N/A	QP
1496	FALSE	293.05466@12.354-QP	#N/A	293.055	12.354	C8H13Cl2N7O	#N/A	#N/A	QP
1497	FALSE	293.07792@1.026-QP	#N/A	293.078	1.026	C10H16ClN3O5	#N/A	#N/A	QP
1498	FALSE	1-S-[(1E)-N-Hydroxy-4-pentenimidoyl]-1-thio-beta-D-glucopyranose@5.538-QP	1-S-[(1E)-N-Hydroxy-4-pentenimidoyl]-1-thio-beta-D-glucopyranose	293.093	5.538	C11H19NO6S	76963152	#N/A	QP
1499	FALSE	Ondansetron@8.735-QP	Ondansetron	293.152	8.735	C18H19N3O	4434	#N/A	QP
1500	FALSE	Anastrozole@13.121-QP	Anastrozole	293.163	13.121	C17H19N5	2102	#N/A	QP
1501	FALSE	293.82427@0.915-QP	#N/A	293.824	0.915	CH3Cl3O5P2S	#N/A	#N/A	QP
1502	FALSE	294.05623@1.76-QP	#N/A	294.056	1.76	C8H17N4O2P3	#N/A	#N/A	QP
1503	FALSE	294.05636@1.617-QP	#N/A	294.056	1.617	C8H17N4O2P3	#N/A	#N/A	QP
1504	FALSE	294.05774@2.193-QP	#N/A	294.058	2.193	C8H17N4O2P3	#N/A	#N/A	QP
1505	FALSE	294.07047@9.806-QP	#N/A	294.07	9.806	C9H14N2O9	#N/A	#N/A	QP
1506	FALSE	294.08537@7.569-QP	#N/A	294.085	7.569	C15H21P3	#N/A	#N/A	QP
1507	FALSE	Aspartam@2.148-QP	Aspartam	294.121	2.148	C14H18N2O5	#N/A	Other	QP
1508	FALSE	Aspartam@4.266-QP	Aspartam	294.121	4.266	C14H18N2O5	#N/A	Other	QP
1509	FALSE	13(S)-HOT@17.026-QP	13(S)-HOT	294.218	17.026	C18H30O3	#N/A	Metabolic pathways;Biosynthesis of secondary metabolites;Other	QP
1510	FALSE	13(S)-HOT@18.142-QP	13(S)-HOT	294.218	18.142	C18H30O3	#N/A	Metabolic pathways;Biosynthesis of secondary metabolites;Other	QP
1511	FALSE	HEXAETHYLMELAMINE@22.446-QP	HEXAETHYLMELAMINE	294.254	22.446	C15H30N6	16826	Biosynthesis of plant secondary metabolites	QP
1512	FALSE	HEXAETHYLMELAMINE@17.275-QP	HEXAETHYLMELAMINE	294.254	17.275	C15H30N6	16826	Biosynthesis of plant secondary metabolites	QP
1513	FALSE	Diclofenac@15.39-QP	Diclofenac	295.015	15.39	C14H11Cl2NO2	2925	#N/A	QP
1514	FALSE	295.05754@0.966-QP	#N/A	295.058	0.966	C9H10N7O3P	#N/A	Metabolic pathways;Biosynthesis of secondary metabolites;Biosynthesis of cofactors;Other	QP
1515	FALSE	N4-Acetylsulfamethoxazole@7.152-QP	N4-Acetylsulfamethoxazole	295.061	7.152	C12H13N3O4S	58771	#N/A	QP
1516	FALSE	N4-Acetylsulfamethoxazole@10.412-QP	N4-Acetylsulfamethoxazole	295.061	10.412	C12H13N3O4S	58771	#N/A	QP
1517	FALSE	N4-Acetylsulfamethoxazole@8.541-QP	N4-Acetylsulfamethoxazole	295.062	8.541	C12H13N3O4S	58771	#N/A	QP
1518	FALSE	N4-Acetylsulfamethoxazole@8.828-QP	N4-Acetylsulfamethoxazole	295.062	8.828	C12H13N3O4S	58771	#N/A	QP
1519	FALSE	295.13771@16.749-QP	#N/A	295.138	16.749	#N/A	#N/A	#N/A	QP
1520	FALSE	295.99992@9.51-QP	#N/A	296	9.51	C8H15Cl3O5	#N/A	#N/A	QP
1521	FALSE	2-Amino-3-{[({2-carboxy-2-[(Z)-(1-hydroxyethylidene)amino]ethyl}sulfanyl)methyl]sulfanyl}propanoicacid(non-preferredname)@1.474-QP	2-Amino-3-{[({2-carboxy-2-[(Z)-(1-hydroxyethylidene)amino]ethyl}sulfanyl)methyl]sulfanyl}propanoicacid(non-preferredname)	296.049	1.474	C9H16N2O5S2	10381132	#N/A	QP
1522	FALSE	296.08393@5.696-QP	#N/A	296.084	5.696	C13H18N2O2P2	#N/A	#N/A	QP
1523	FALSE	296.12741@12.407-QP	#N/A	296.127	12.407	C9H16N10S	#N/A	#N/A	QP
1524	FALSE	296.23347@17.13-QP	#N/A	296.233	17.13	C14H28N6O	#N/A	#N/A	QP
1525	FALSE	296.26995@21.797-QP	#N/A	296.27	21.797	C15H32N6	#N/A	#N/A	QP
1526	FALSE	Nonadecenoicacid@21.994-QP	Nonadecenoicacid	296.27	21.994	C19H36O2	#N/A	#N/A	QP
1527	FALSE	296.96308@6.095-QP	#N/A	296.963	6.095	C6H4ClN3O9	#N/A	#N/A	QP
1528	FALSE	297.0145@9.501-QP	#N/A	297.014	9.501	C4H9N7O5P2	#N/A	#N/A	QP
1529	FALSE	1-hydroxy-2-(4-aminophenyl)ethane-1,1-diphosphonicacid@0.951-QP	1-hydroxy-2-(4-aminophenyl)ethane-1,1-diphosphonicacid	297.017	0.951	C8H13NO7P2	14314968	#N/A	QP
1530	FALSE	297.06532@10.892-QP	#N/A	297.065	10.892	C15H12N3O2P	#N/A	#N/A	QP
1531	FALSE	5-methylthioadenosine@7.17-QP	5-methylthioadenosine	297.089	7.17	C11H15N5O3S	#N/A	Metabolic pathways;Biosynthesis of plant secondary metabolites;Other	QP
1532	FALSE	297.2737@21.801-QP	#N/A	297.274	21.801	#N/A	#N/A	#N/A	QP
1533	FALSE	Genistein-4,7-dimethylether@11.786-QP	Genistein-4,7-dimethylether	298.083	11.786	C17H14O5	#N/A	#N/A	QP
1534	FALSE	298.09749@16.508-QP	#N/A	298.097	16.508	C17H10N6	#N/A	#N/A	QP
1535	FALSE	298.17412@12.632-QP	#N/A	298.174	12.632	C15H28N2P2	#N/A	#N/A	QP
1536	FALSE	10-Methoxy-1,5,9-trimethyl-11,14,15,16-tetraoxatetracyclo[10.3.1.0~4,13~.0~8,13~]hexadecane@19.645-QP	10-Methoxy-1,5,9-trimethyl-11,14,15,16-tetraoxatetracyclo[10.3.1.0~4,13~.0~8,13~]hexadecane	298.177	19.645	C16H26O5	437594	#N/A	QP
1537	FALSE	3-[(8E,11E)-8,11,14-Pentadecatrien-1-yl]phenol@13.263-QP	3-[(8E,11E)-8,11,14-Pentadecatrien-1-yl]phenol	298.228	13.263	C21H30O	4513584	#N/A	QP
1538	FALSE	NP-011548@17.564-QP	NP-011548	298.249	17.564	C18H34O3	#N/A	Other	QP
1539	FALSE	298.26044@20.19-QP	#N/A	298.26	20.19	C13H30N8	#N/A	#N/A	QP
1540	FALSE	Methylstearate@19.086-QP	Methylstearate	298.286	19.086	C19H38O2	7909	#N/A	QP
1541	FALSE	298.62441@16.409-QP	#N/A	298.624	16.409	#N/A	#N/A	#N/A	QP
1542	FALSE	Imipenem@7.475-QP	Imipenem	299.093	7.475	C12H17N3O4S	94631	#N/A	QP
1543	FALSE	Anthraniloyl-O-glucopyranose@1.812-QP	Anthraniloyl-O-glucopyranose	299.1	1.812	C13H17NO7	#N/A	Metabolic pathways;Biosynthesis of secondary metabolites;Other	QP
1544	FALSE	metoclopramide@7.885-QP	metoclopramide	299.139	7.885	C14H22ClN3O2	4024	#N/A	QP
1545	FALSE	N,N-dimethyl-5-methoxymethyl-2'-deoxycytidine@1.415-QP	N,N-dimethyl-5-methoxymethyl-2'-deoxycytidine	299.147	1.415	C13H21N3O5	20169787	#N/A	QP
1546	FALSE	N-methylcoclaurine@5.942-QP	N-methylcoclaurine	299.151	5.942	C18H21NO3	#N/A	Metabolic pathways;Biosynthesis of secondary metabolites;Biosynthesis of alkaloids derived from shikimate pathway;Drug metabolism - cytochrome P450;Other	QP
1547	FALSE	3-Hydroxy-N-[(3S)-2-oxotetrahydro-3-furanyl]dodecanamide@9.826-QP	3-Hydroxy-N-[(3S)-2-oxotetrahydro-3-furanyl]dodecanamide	299.209	9.826	C16H29NO4	9067166	#N/A	QP
1548	FALSE	299.28093@19.074-QP	#N/A	299.281	19.074	C14H33N7	#N/A	#N/A	QP
1549	FALSE	299.97824@1.675-QP	#N/A	299.978	1.675	C7H8O11S	#N/A	#N/A	QP
1550	FALSE	Tazobactam@3.706-QP	Tazobactam	300.052	3.706	C10H12N4O5S	4670	#N/A	QP
1551	FALSE	300.10958@10.763-QP	#N/A	300.11	10.763	C12H12N8O2	#N/A	#N/A	QP
1552	FALSE	NPPB@9.33-QP	NPPB	300.11	9.33	C16H16N2O4	4390	#N/A	QP
1553	FALSE	NPPB@9.686-QP	NPPB	300.11	9.686	C16H16N2O4	4390	#N/A	QP
1554	FALSE	NPPB@9.897-QP	NPPB	300.11	9.897	C16H16N2O4	4390	#N/A	QP
1555	FALSE	NPPB@8.061-QP	NPPB	300.11	8.061	C16H16N2O4	4390	#N/A	QP
1556	FALSE	300.20417@19.409-QP	#N/A	300.204	19.409	C17H33PS	#N/A	#N/A	QP
1557	FALSE	11-Hydroxyoctadecanoicacid@18.341-QP	11-Hydroxyoctadecanoicacid	300.265	18.341	C18H36O3	4446037	#N/A	QP
1558	FALSE	300.26495@19.902-QP	#N/A	300.265	19.902	C14H32N6O	#N/A	#N/A	QP
1559	FALSE	301.02188@1.409-QP	#N/A	301.022	1.409	C10H13N3O2P2S	#N/A	#N/A	QP
1560	FALSE	301.02401@7.246-QP	#N/A	301.024	7.246	C15H13NP2S	#N/A	#N/A	QP
1561	FALSE	4-Nitrophenylbeta-D-glucoside@1.55-QP	4-Nitrophenylbeta-D-glucoside	301.079	1.55	C12H15NO8	83889	#N/A	QP
1562	FALSE	4-[(4-Hydroxyphenyl)carbamoyl]-2-methoxyphenylacetate@9.68-QP	4-[(4-Hydroxyphenyl)carbamoyl]-2-methoxyphenylacetate	301.094	9.68	C16H15NO5	704100	#N/A	QP
1563	FALSE	4-[(4-Hydroxyphenyl)carbamoyl]-2-methoxyphenylacetate@9.327-QP	4-[(4-Hydroxyphenyl)carbamoyl]-2-methoxyphenylacetate	301.094	9.327	C16H15NO5	704100	#N/A	QP
1564	FALSE	4-[(4-Hydroxyphenyl)carbamoyl]-2-methoxyphenylacetate@9.889-QP	4-[(4-Hydroxyphenyl)carbamoyl]-2-methoxyphenylacetate	301.094	9.889	C16H15NO5	704100	#N/A	QP
1565	FALSE	301.09685@6.662-QP	#N/A	301.097	6.662	C9H15N7O3S	#N/A	#N/A	QP
1566	FALSE	3-hydroxycoclaurine@6.177-QP	3-hydroxycoclaurine	301.13	6.177	C17H19NO4	#N/A	Biosynthesis of secondary metabolites;Other	QP
1567	FALSE	1-Acetoxy-3-(acetoxymethoxy)carbonyl-2,2,5,5-tetramethylpyrrolidine@2.954-QP	1-Acetoxy-3-(acetoxymethoxy)carbonyl-2,2,5,5-tetramethylpyrrolidine	301.152	2.954	C14H23NO6	3766716	#N/A	QP
1568	FALSE	MFCD00134324@13.233-QP	MFCD00134324	301.187	13.233	C19H27NS	21170905	#N/A	QP
1569	FALSE	301.20641@13.298-QP	#N/A	301.206	13.298	C16H31NO2S	#N/A	#N/A	QP
1570	FALSE	CarnitineC9:0@11.22-QP	CarnitineC9:0	301.224	11.22	C16H31NO4	#N/A	#N/A	QP
1571	FALSE	CarnitineC9:0@10.702-QP	CarnitineC9:0	301.224	10.702	C16H31NO4	#N/A	#N/A	QP
1572	FALSE	301.90443@0.946-QP	#N/A	301.904	0.946	C3H2Cl2N6O3P2	#N/A	#N/A	QP
1573	FALSE	302.0262@1.362-QP	#N/A	302.026	1.362	C10H13ClN4OP2	#N/A	#N/A	QP
1574	FALSE	302.03846@5.632-QP	#N/A	302.038	5.632	C11H14N2O4S2	#N/A	#N/A	QP
1575	FALSE	(10-Methyl-9-anthryl)methylhydrogensulfate@1.454-QP	(10-Methyl-9-anthryl)methylhydrogensulfate	302.062	1.454	C16H14O4S	20088087	#N/A	QP
1576	FALSE	302.06947@13.861-QP	#N/A	302.069	13.861	C13H11ClN6O	#N/A	#N/A	QP
1577	FALSE	Hesperetin@10.24-QP	Hesperetin	302.078	10.24	C16H14O6	65234	Metabolic pathways;Biosynthesis of secondary metabolites;Other	QP
1578	FALSE	302.0869@2.9-QP	#N/A	302.087	2.9	C12H21N2OP3	#N/A	#N/A	QP
1579	FALSE	TTEGDA@1.391-QP	TTEGDA	302.137	1.391	C14H22O7	26793	#N/A	QP
1580	FALSE	11b-hydroxyandrost-4-ene-3,17-dione@10.138-QP	11b-hydroxyandrost-4-ene-3,17-dione	302.187	10.138	C19H26O3	#N/A	Metabolic pathways;Biosynthesis of secondary metabolites;Other	QP
1581	FALSE	Eicosapentaenoicacid@20.171-QP	Eicosapentaenoicacid	302.22	20.171	C20H30O2	4941649	#N/A	QP
1582	FALSE	Eicosapentaenoicacid@19.411-QP	Eicosapentaenoicacid	302.223	19.411	C20H30O2	4941649	Metabolic pathways;Biosynthesis of secondary metabolites;Biosynthesis of unsaturated fatty acids;Other	QP
1583	FALSE	302.22307@14.827-QP	#N/A	302.223	14.827	C16H26N6	#N/A	Metabolic pathways;Biosynthesis of secondary metabolites;Biosynthesis of unsaturated fatty acids;Other	QP
1584	FALSE	Eicosapentaenoicacid@17.612-QP	Eicosapentaenoicacid	302.223	17.612	C20H30O2	4941649	Metabolic pathways;Biosynthesis of secondary metabolites;Biosynthesis of unsaturated fatty acids;Other	QP
1585	FALSE	1727502@18.1-QP	1727502	302.245	18.1	C17H34O4	71382	#N/A	QP
1586	FALSE	Cocaine@4.77-QP	Cocaine	303.146	4.77	C17H21NO4	10194104	Metabolic pathways;Biosynthesis of secondary metabolites;Biosynthesis of alkaloids derived from ornithine, lysine and nicotinic acid;Tropane, piperidine and pyridine alkaloid biosynthesis	QP
1587	FALSE	3-hydroxyoctanoylcarnitine@7.771-QP	3-hydroxyoctanoylcarnitine	303.204	7.771	C15H29NO5	28657784	#N/A	QP
1588	FALSE	3-hydroxyoctanoylcarnitine@7.927-QP	3-hydroxyoctanoylcarnitine	303.204	7.927	C15H29NO5	28657784	#N/A	QP
1589	FALSE	303.91636@1.62-QP	#N/A	303.916	1.62	C3H5N4O5PS3	#N/A	#N/A	QP
1590	FALSE	1,8-Octanediyldisulfamate@2.866-QP	1,8-Octanediyldisulfamate	304.078	2.866	C8H20N2O6S2	1769608	#N/A	QP
1591	FALSE	304.14881@5.934-QP	#N/A	304.149	5.934	C10H20N6O5	#N/A	#N/A	QP
1592	FALSE	5-amino-1-tert-butyl-3-(1-naphthalenylmethyl)-4-pyrazolecarbonitrile@13.205-QP	5-amino-1-tert-butyl-3-(1-naphthalenylmethyl)-4-pyrazolecarbonitrile	304.168	13.205	C19H20N4	4228275	#N/A	QP
1593	FALSE	Arachidonicacid@20.119-QP	Arachidonicacid	304.239	20.119	C20H32O2	392692	Metabolic pathways;Biosynthesis of secondary metabolites;Biosynthesis of unsaturated fatty acids;Other	QP
1594	FALSE	Arachidonicacid@17.407-QP	Arachidonicacid	304.239	17.407	C20H32O2	392692	#N/A	QP
1595	FALSE	Icosa-5,8,11,14-tetraenoicacid@15.943-QP	Icosa-5,8,11,14-tetraenoicacid	304.239	15.943	C20H32O2	4471967	Metabolic pathways;Biosynthesis of secondary metabolites;Biosynthesis of unsaturated fatty acids;Other	QP
1596	FALSE	305.14653@1.4-QP	#N/A	305.147	1.4	C17H25NP2	#N/A	#N/A	QP
1597	FALSE	6-hydroxyhyoscyamine@14.766-QP	6-hydroxyhyoscyamine	305.162	14.766	C17H23NO4	#N/A	Metabolic pathways;Biosynthesis of secondary metabolites;Tropane, piperidine and pyridine alkaloid biosynthesis	QP
1598	FALSE	305.63499@12.446-QP	#N/A	305.635	12.446	#N/A	#N/A	#N/A	QP
1599	FALSE	305.91411@12.487-QP	#N/A	305.914	12.487	C9H6O4S4	#N/A	#N/A	QP
1600	FALSE	305.94933@1.003-QP	#N/A	305.949	1.003	C7H4Cl2N6O2S	#N/A	#N/A	QP
1601	FALSE	306.01211@1.407-QP	#N/A	306.012	1.407	C6H17N2O4P3S	#N/A	#N/A	QP
1602	FALSE	306.02857@0.871-QP	#N/A	306.029	0.871	C7H16O9P2	#N/A	#N/A	QP
1603	FALSE	306.03955@6.431-QP	#N/A	306.04	6.431	C7H10N6O6S	#N/A	#N/A	QP
1604	FALSE	306.10268@9.142-QP	#N/A	306.103	9.142	C17H15N4P	#N/A	#N/A	QP
1605	FALSE	6-hydroxytrimethoprim@6.109-QP	6-hydroxytrimethoprim	306.132	6.109	C14H18N4O4	15439086	#N/A	QP
1606	FALSE	306.17904@17.419-QP	#N/A	306.179	17.419	C13H26N2O6	#N/A	#N/A	QP
1607	FALSE	Dihomo-?-LinolenicAcid@20.701-QP	Dihomo-?-LinolenicAcid	306.254	20.701	C20H34O2	#N/A	Metabolic pathways;Biosynthesis of secondary metabolites;Biosynthesis of unsaturated fatty acids;Other	QP
1608	FALSE	306.94501@1.411-QP	#N/A	306.945	1.411	C7H14Cl2NP3S	#N/A	#N/A	QP
1609	FALSE	307.1169@15.15-QP	#N/A	307.117	15.15	C15H13N7O	#N/A	#N/A	QP
1610	FALSE	Hippuryl-Lys@1.942-QP	Hippuryl-Lys	307.152	1.942	C15H21N3O4	88679	#N/A	QP
1611	FALSE	Zolpidem@9.328-QP	Zolpidem	307.168	9.328	C19H21N3O	5530	#N/A	QP
1612	FALSE	Buflomedil@9.747-QP	Buflomedil	307.177	9.747	C17H25NO4	2373	#N/A	QP
1613	FALSE	307.82777@0.951-QP	#N/A	307.828	0.951	C6H2Cl4O2P2	#N/A	#N/A	QP
1614	FALSE	307.94619@1.001-QP	#N/A	307.946	1.001	C7HN8OPS2	#N/A	#N/A	QP
1615	FALSE	308.03386@12.398-QP	#N/A	308.034	12.398	C10H8N6O4S	#N/A	#N/A	QP
1616	FALSE	308.07363@6.466-QP	#N/A	308.074	6.466	C14H17N2O2PS	#N/A	#N/A	QP
1617	FALSE	308.08155@13.667-QP	#N/A	308.082	13.667	C16H17ClO4	#N/A	#N/A	QP
1618	FALSE	Warfarin@14.544-QP	Warfarin	308.103	14.544	C19H16O4	#N/A	Biosynthesis of secondary metabolites;Other	QP
1619	FALSE	308.14599@7.311-QP	#N/A	308.146	7.311	C13H24O8	#N/A	#N/A	QP
1620	FALSE	Diacetalol@6.992-QP	Diacetalol	308.172	6.992	C16H24N2O4	#N/A	#N/A	QP
1621	FALSE	308.19456@18.33-QP	#N/A	308.195	18.33	C15H33O2PS	#N/A	#N/A	QP
1622	FALSE	308.19474@18.138-QP	#N/A	308.195	18.138	C15H33O2PS	#N/A	#N/A	QP
1623	FALSE	308.19481@16.435-QP	#N/A	308.195	16.435	C15H35P3	#N/A	#N/A	QP
1624	FALSE	11(Z),14(Z)-EicosadienoicAcid@21.512-QP	11(Z),14(Z)-EicosadienoicAcid	308.27	21.512	C20H36O2	#N/A	#N/A	QP
1625	FALSE	Redul@11.294-QP	Redul	309.078	11.294	C13H15N3O4S	9190	#N/A	QP
1626	FALSE	309.10411@1.391-QP	#N/A	309.104	1.391	C7H15N7O7	#N/A	Metabolic pathways;Other	QP
1627	FALSE	Glycyl-L-tyrosyl-L-alanine@1.404-QP	Glycyl-L-tyrosyl-L-alanine	309.131	1.404	C14H19N3O5	169143	#N/A	QP
1628	FALSE	1-(tert-Butylamino)-3-((5,6,7,8-tetrahydro-cis-6,7-dihydroxy-1-naphthyl)oxy)-2-propanol@9.781-QP	1-(tert-Butylamino)-3-((5,6,7,8-tetrahydro-cis-6,7-dihydroxy-1-naphthyl)oxy)-2-propanol	309.193	9.781	C17H27NO4	4258	#N/A	QP
1629	FALSE	1-(tert-Butylamino)-3-((5,6,7,8-tetrahydro-cis-6,7-dihydroxy-1-naphthyl)oxy)-2-propanol@10.15-QP	1-(tert-Butylamino)-3-((5,6,7,8-tetrahydro-cis-6,7-dihydroxy-1-naphthyl)oxy)-2-propanol	309.193	10.15	C17H27NO4	4258	#N/A	QP
1630	FALSE	Methadone@11.771-QP	Methadone	309.208	11.771	C21H27NO	3953	Drug metabolism - cytochrome P450	QP
1631	FALSE	309.82507@0.952-QP	#N/A	309.825	0.952	C4H2Cl2O4P2S2	#N/A	#N/A	QP
1632	FALSE	310.10716@12.604-QP	#N/A	310.107	12.604	C12H22O7S	#N/A	#N/A	QP
1633	FALSE	310.10723@11.629-QP	#N/A	310.107	11.629	C12H22O7S	#N/A	#N/A	QP
1634	FALSE	Gamma-glutamyltyrosine@2.642-QP	Gamma-glutamyltyrosine	310.116	2.642	C14H18N2O6	#N/A	#N/A	QP
1635	FALSE	N-{1-Amino-5-[(E)-(1-amino-2-chloroethylidene)amino]-1-oxo-2-pentanyl}benzamide@13.698-QP	N-{1-Amino-5-[(E)-(1-amino-2-chloroethylidene)amino]-1-oxo-2-pentanyl}benzamide	310.119	13.698	C14H19ClN4O2	10138593	#N/A	QP
1636	FALSE	310.1249@1.359-QP	#N/A	310.125	1.359	C9H14N10O3	#N/A	#N/A	QP
1637	FALSE	310.17977@17.081-QP	#N/A	310.18	17.081	C10H26N6O3S	#N/A	#N/A	QP
1638	FALSE	Pamatolol@6.447-QP	Pamatolol	310.188	6.447	C16H26N2O4	39320	#N/A	QP
1639	FALSE	310.21028@19.205-QP	#N/A	310.21	19.205	C13H30N2O6	#N/A	#N/A	QP
1640	FALSE	310.21235@16.822-QP	#N/A	310.212	16.822	C14H26N6O2	#N/A	#N/A	QP
1641	FALSE	(3E)-4-(2,3,4-Trihydroxy-2,5,5,8a-tetramethyldecahydro-1-naphthalenyl)-3-buten-2-one@16.353-QP	(3E)-4-(2,3,4-Trihydroxy-2,5,5,8a-tetramethyldecahydro-1-naphthalenyl)-3-buten-2-one	310.213	16.353	C18H30O4	35013883	Metabolic pathways;Biosynthesis of secondary metabolites;Other	QP
1642	FALSE	13-Ethyl-17-ethynyl-11-methylene-2,3,6,7,8,9,10,11,12,13,14,15,16,17-tetradecahydro-1H-cyclopenta[a]phenanthren-17-ol@22.059-QP	13-Ethyl-17-ethynyl-11-methylene-2,3,6,7,8,9,10,11,12,13,14,15,16,17-tetradecahydro-1H-cyclopenta[a]phenanthren-17-ol	310.228	22.059	C22H30O	3848314	#N/A	QP
1643	FALSE	310.98359@7.689-QP	#N/A	310.984	7.689	C11H6NO8P	#N/A	#N/A	QP
1644	FALSE	4198042@13.63-QP	4198042	311.01	13.63	C14H11Cl2NO3	104192	#N/A	QP
1645	FALSE	311.05636@8.589-QP	#N/A	311.056	8.589	C12H13N3O5S	#N/A	#N/A	QP
1646	FALSE	311.05641@9.307-QP	#N/A	311.056	9.307	C12H13N3O5S	#N/A	#N/A	QP
1647	FALSE	17-Allyl-7,8-didehydro-4,5-epoxymorphinan-3,6-diol@16.547-QP	17-Allyl-7,8-didehydro-4,5-epoxymorphinan-3,6-diol	311.151	16.547	C19H21NO3	4270	Metabolic pathways;Biosynthesis of secondary metabolites;Biosynthesis of alkaloids derived from shikimate pathway;Other	QP
1648	FALSE	CarnitineC10:2@10.505-QP	CarnitineC10:2	311.208	10.505	C17H29NO4	#N/A	#N/A	QP
1649	FALSE	CarnitineC10:2@9.663-QP	CarnitineC10:2	311.209	9.663	C17H29NO4	#N/A	#N/A	QP
1650	FALSE	311.77391@1.016-QP	#N/A	311.774	1.016	C4HBrCl3OPS	#N/A	#N/A	QP
1651	FALSE	311.97468@1.337-QP	#N/A	311.975	1.337	C3H8N2O13S	#N/A	#N/A	QP
1652	FALSE	Acetaminophenmercapturate@6.99-QP	Acetaminophenmercapturate	312.077	6.99	C13H16N2O5S	75765	#N/A	QP
1653	FALSE	Phenylalanylphenylalanine@7.907-QP	Phenylalanylphenylalanine	312.146	7.907	C18H20N2O3	#N/A	#N/A	QP
1654	FALSE	312.18148@19.65-QP	#N/A	312.181	19.65	C13H29ClN2O4	#N/A	#N/A	QP
1655	FALSE	(±)9-HpODE@17.026-QP	(±)9-HpODE	312.228	17.026	C18H32O4	#N/A	Metabolic pathways;Biosynthesis of secondary metabolites;Other	QP
1656	FALSE	(5S,8R)-DiHODE@14.771-QP	(5S,8R)-DiHODE	312.228	14.771	C18H32O4	#N/A	Metabolic pathways;Biosynthesis of secondary metabolites;Other	QP
1657	FALSE	methyl9,10-epoxystearate@19.691-QP	methyl9,10-epoxystearate	312.265	19.691	C19H36O3	473467	#N/A	QP
1658	FALSE	ArachidicAcid@22.672-QP	ArachidicAcid	312.301	22.672	C20H40O2	#N/A	#N/A	QP
1659	FALSE	ArachidicAcid@22.669-QP	ArachidicAcid	312.301	22.669	C20H40O2	#N/A	Biosynthesis of unsaturated fatty acids	QP
1660	FALSE	ArachidicAcid@23.638-QP	ArachidicAcid	312.301	23.638	C20H40O2	#N/A	Biosynthesis of unsaturated fatty acids	QP
1661	FALSE	312.67138@12.947-QP	#N/A	312.671	12.947	#N/A	#N/A	#N/A	QP
1662	FALSE	312.67158@13.124-QP	#N/A	312.672	13.124	#N/A	#N/A	#N/A	QP
1663	FALSE	313.01167@0.947-QP	#N/A	313.012	0.947	C9H17NO3P2S2	#N/A	#N/A	QP
1664	FALSE	313.02093@16.752-QP	#N/A	313.021	16.752	C4H9ClN9O4P	#N/A	#N/A	QP
1665	FALSE	CarnitineC10:1@11.408-QP	CarnitineC10:1	313.224	11.408	C17H31NO4	#N/A	#N/A	QP
1666	FALSE	CarnitineC10:1@11.713-QP	CarnitineC10:1	313.224	11.713	C17H31NO4	#N/A	#N/A	QP
1667	FALSE	CarnitineC10:1@10.84-QP	CarnitineC10:1	313.225	10.84	C17H31NO4	#N/A	#N/A	QP
1668	FALSE	313.99544@7.428-QP	#N/A	313.995	7.428	C10H12Cl2O7	#N/A	#N/A	QP
1669	FALSE	Rofecoxib@4.486-QP	Rofecoxib	314.062	4.486	C17H14O4S	4911	#N/A	QP
1670	FALSE	314.08633@9.655-QP	#N/A	314.086	9.655	C13H21N2OP3	#N/A	#N/A	QP
1671	FALSE	314.12519@15.382-QP	#N/A	314.125	15.382	C13H14N8O2	#N/A	#N/A	QP
1672	FALSE	DMCM@12.468-QP	DMCM	314.125	12.468	C17H18N2O4	94746	#N/A	QP
1673	FALSE	DMCM@12.25-QP	DMCM	314.125	12.25	C17H18N2O4	94746	#N/A	QP
1674	FALSE	314.16963@1.843-QP	#N/A	314.17	1.843	C11H26N2O8	#N/A	#N/A	QP
1675	FALSE	BRD32048@16.493-QP	BRD32048	314.186	16.493	C16H22N6O	613832	#N/A	QP
1676	FALSE	Progesterone@10.806-QP	Progesterone	314.223	10.806	C21H30O2	5773	Metabolic pathways;Biosynthesis of secondary metabolites;Other	QP
1677	FALSE	314.22304@10.988-QP	#N/A	314.223	10.988	C17H26N6	#N/A	Metabolic pathways;Biosynthesis of secondary metabolites;Other	QP
1678	FALSE	314.2439@19.427-QP	#N/A	314.244	19.427	C14H30N6O2	#N/A	#N/A	QP
1679	FALSE	314.24397@15.436-QP	#N/A	314.244	15.436	C14H30N6O2	#N/A	Other	QP
1680	FALSE	314.24411@17.91-QP	#N/A	314.244	17.91	C14H30N6O2	#N/A	Other	QP
1681	FALSE	314.24414@17.434-QP	#N/A	314.244	17.434	C14H30N6O2	#N/A	Other	QP
1682	FALSE	Bromazepam@10.894-QP	Bromazepam	315	10.894	C14H10BrN3O	2347	#N/A	QP
1683	FALSE	Clonazepam@12.711-QP	Clonazepam	315.04	12.711	C15H10ClN3O3	2700	#N/A	QP
1684	FALSE	315.10924@13.473-QP	#N/A	315.109	13.473	C13H13N7O3	#N/A	#N/A	QP
1685	FALSE	AcetochlorESA@6.896-QP	AcetochlorESA	315.113	6.896	C14H21NO5S	4932268	#N/A	QP
1686	FALSE	3-hydroxy-N-methyl-coclaurine@6.422-QP	3-hydroxy-N-methyl-coclaurine	315.146	6.422	C18H21NO4	#N/A	Metabolic pathways;Biosynthesis of secondary metabolites;Biosynthesis of alkaloids derived from shikimate pathway;Other	QP
1687	FALSE	Decanoylcarnitine@12.183-QP	Decanoylcarnitine	315.24	12.183	C17H33NO4	#N/A	#N/A	QP
1688	FALSE	315.89853@0.932-QP	#N/A	315.899	0.932	C5H9Cl3O5P2	#N/A	#N/A	QP
1689	FALSE	1-[N-Cyano-N-(4,6-dimethyl-2-pyrimidinyl)glycyl]-4-piperidinecarboxamide@15.17-QP	1-[N-Cyano-N-(4,6-dimethyl-2-pyrimidinyl)glycyl]-4-piperidinecarboxamide	316.166	15.17	C15H20N6O2	579560	#N/A	QP
1690	FALSE	316.1873@15.565-QP	#N/A	316.187	15.565	C13H20N10	#N/A	#N/A	QP
1691	FALSE	15-deoxy-delta-12,14-PGJ2@12.191-QP	15-deoxy-delta-12,14-PGJ2	316.203	12.191	C20H28O3	#N/A	Metabolic pathways;Biosynthesis of secondary metabolites;Other	QP
1692	FALSE	20a-hydroxy-4-pregnen-3-one@11.718-QP	20a-hydroxy-4-pregnen-3-one	316.239	11.718	C21H32O2	#N/A	Metabolic pathways;Other	QP
1693	FALSE	20a-hydroxy-4-pregnen-3-one@19.941-QP	20a-hydroxy-4-pregnen-3-one	316.239	19.941	C21H32O2	#N/A	Metabolic pathways;Other	QP
1694	FALSE	9,10-Dihydroxystearicacid@16.169-QP	9,10-Dihydroxystearicacid	316.26	16.169	C18H36O4	80658	Other	QP
1695	FALSE	Ethyl3-(benzoyloxy)-8-methyl-8-azabicyclo[3.2.1]octane-2-carboxylate@6.233-QP	Ethyl3-(benzoyloxy)-8-methyl-8-azabicyclo[3.2.1]octane-2-carboxylate	317.162	6.233	C18H23NO4	2723	#N/A	QP
1696	FALSE	O-suberoylcarnitine@6.89-QP	O-suberoylcarnitine	317.183	6.89	C15H27NO6	30776666	#N/A	QP
1697	FALSE	317.86849@0.909-QP	#N/A	317.868	0.909	C5H3Cl2N2O4P3	#N/A	#N/A	QP
1698	FALSE	317.96144@1.019-QP	#N/A	317.961	1.019	C2H8Cl2N4O10	#N/A	#N/A	QP
1699	FALSE	318.00004@1.327-QP	#N/A	318	1.327	C7H14N2O6S3	#N/A	#N/A	QP
1700	FALSE	318.02924@2.957-QP	#N/A	318.029	2.957	C9H12N4O5P2	#N/A	#N/A	QP
1701	FALSE	Fenofibricacid@15.328-QP	Fenofibricacid	318.064	15.328	C17H15ClO4	#N/A	Other	QP
1702	FALSE	1-Allyl-5-(3,4-dimethoxybenzyl)-2,4,6(1H,3H,5H)-pyrimidinetrione@9.66-QP	1-Allyl-5-(3,4-dimethoxybenzyl)-2,4,6(1H,3H,5H)-pyrimidinetrione	318.12	9.66	C16H18N2O5	2195363	#N/A	QP
1703	FALSE	1-Allyl-5-(3,4-dimethoxybenzyl)-2,4,6(1H,3H,5H)-pyrimidinetrione@9.328-QP	1-Allyl-5-(3,4-dimethoxybenzyl)-2,4,6(1H,3H,5H)-pyrimidinetrione	318.12	9.328	C16H18N2O5	2195363	#N/A	QP
1704	FALSE	his-tyr@2.268-QP	his-tyr	318.132	2.268	C15H18N4O4	449881	#N/A	QP
1705	FALSE	omberacetam@7.386-QP	omberacetam	318.157	7.386	C17H22N2O4	157065	#N/A	QP
1706	FALSE	19-Sulfanylandrost-4-ene-3,17-dione@13.589-QP	19-Sulfanylandrost-4-ene-3,17-dione	318.166	13.589	C19H26O2S	128912	#N/A	QP
1707	FALSE	318.21809@16.934-QP	#N/A	318.218	16.934	C16H26N6O	#N/A	Metabolic pathways;Biosynthesis of secondary metabolites;Other	QP
1708	FALSE	5a-pregnan-20a-ol-3-one@22.224-QP	5a-pregnan-20a-ol-3-one	318.254	22.224	C21H34O2	#N/A	Metabolic pathways;Other	QP
1709	FALSE	318.27515@18.492-QP	#N/A	318.275	18.492	C14H34N6O2	#N/A	#N/A	QP
1710	FALSE	trp-asp@9.416-QP	trp-asp	319.116	9.416	C15H17N3O5	5382076	#N/A	QP
1711	FALSE	320.04442@9.511-QP	#N/A	320.044	9.511	C9H19Cl2N2O4P	#N/A	#N/A	QP
1712	FALSE	320.07283@1.596-QP	#N/A	320.073	1.596	C8H12N6O8	#N/A	#N/A	QP
1713	FALSE	320.07496@13.308-QP	#N/A	320.075	13.308	C8H21ClN4O3S2	#N/A	#N/A	QP
1714	FALSE	320.07975@13.862-QP	#N/A	320.08	13.862	C13H13ClN6O2	#N/A	#N/A	QP
1715	FALSE	PR-toxin@17.36-QP	PR-toxin	320.125	17.36	C17H20O6	#N/A	Other	QP
1716	FALSE	320.17228@10.853-QP	#N/A	320.172	10.853	C17H24N2O4	#N/A	#N/A	QP
1717	FALSE	H-Arg-Phe-NH2@10.237-QP	H-Arg-Phe-NH2	320.197	10.237	C15H24N6O2	108975	#N/A	QP
1718	FALSE	12-S-Hydroxyeicosatetraenoicacid@17.611-QP	12-S-Hydroxyeicosatetraenoicacid	320.233	17.611	C20H32O3	4942377	Metabolic pathways;Other	QP
1719	FALSE	320.26964@18.569-QP	#N/A	320.27	18.569	C17H32N6	#N/A	#N/A	QP
1720	FALSE	320.26976@18.091-QP	#N/A	320.27	18.091	C15H37N4OP	#N/A	#N/A	QP
1721	FALSE	5a-pregnane-3a,20a-diol@22.898-QP	5a-pregnane-3a,20a-diol	320.27	22.898	C21H36O2	#N/A	Metabolic pathways;Other	QP
1722	FALSE	321.09071@11.021-QP	#N/A	321.091	11.021	C15H12N7P	#N/A	#N/A	QP
1723	FALSE	1-[(1,3-Benzodioxol-5-ylmethyl)carbamothioyl]-4-piperidinecarboxamide@13.594-QP	1-[(1,3-Benzodioxol-5-ylmethyl)carbamothioyl]-4-piperidinecarboxamide	321.113	13.594	C15H19N3O3S	704457	#N/A	QP
1724	FALSE	dansylsarcosine@1.788-QP	dansylsarcosine	322.097	1.788	C15H18N2O4S	109013	#N/A	QP
1725	FALSE	322.16179@1.402-QP	#N/A	322.162	1.402	C9H23N8O3P	#N/A	#N/A	QP
1726	FALSE	322.24881@17.308-QP	#N/A	322.249	17.308	C16H30N6O	#N/A	#N/A	QP
1727	FALSE	322.26026@19.619-QP	#N/A	322.26	19.619	C15H30N8	#N/A	#N/A	QP
1728	FALSE	MetazachlorESA@12.265-QP	MetazachlorESA	323.093	12.265	C14H17N3O4S	28290254	#N/A	QP
1729	FALSE	Gliclazide@14.116-QP	Gliclazide	323.129	14.116	C15H21N3O3S	3356	#N/A	QP
1730	FALSE	(2S)-2-({N-[(2S)-2-Ammoniopropanoyl]-L-tyrosyl}amino)propanoate@9.767-QP	(2S)-2-({N-[(2S)-2-Ammoniopropanoyl]-L-tyrosyl}amino)propanoate	323.147	9.767	C15H21N3O5	5384359	#N/A	QP
1731	FALSE	N-[5-(2,3-dihydro-1,4-dioxin-5-yl)-1,3,4-oxadiazol-2-yl]-5-nitro-2-thiophenecarboxamide@4.76-QP	N-[5-(2,3-dihydro-1,4-dioxin-5-yl)-1,3,4-oxadiazol-2-yl]-5-nitro-2-thiophenecarboxamide	324.016	4.76	C11H8N4O6S	2859688	#N/A	QP
1732	FALSE	324.09795@12.454-QP	#N/A	324.098	12.454	C15H12N6O3	#N/A	Biosynthesis of secondary metabolites;Other	QP
1733	FALSE	324.09802@13.064-QP	#N/A	324.098	13.064	C15H12N6O3	#N/A	Biosynthesis of secondary metabolites;Other	QP
1734	FALSE	324.11239@9.458-QP	#N/A	324.112	9.458	C12H27N2P3S	#N/A	#N/A	QP
1735	FALSE	acetohexamide@9.932-QP	acetohexamide	324.113	9.932	C15H20N2O4S	1912	Other	QP
1736	FALSE	1-(2-Methyl-2-propanyl)-2,6-diphenyl-4-phosphinanone@10.545-QP	1-(2-Methyl-2-propanyl)-2,6-diphenyl-4-phosphinanone	324.163	10.545	C21H25OP	4447133	Drug metabolism - cytochrome P450	QP
1737	FALSE	6'-Methoxycinchonan-9-ol@9.262-QP	6'-Methoxycinchonan-9-ol	324.183	9.262	C20H24N2O2	1036	Biosynthesis of alkaloids derived from shikimate pathway;Bile secretion;Other	QP
1738	FALSE	324.22598@19.979-QP	#N/A	324.226	19.979	C14H32N2O6	#N/A	#N/A	QP
1739	FALSE	324.27593@20.564-QP	#N/A	324.276	20.564	C15H32N8	#N/A	#N/A	QP
1740	FALSE	324.98635@2.355-QP	#N/A	324.986	2.355	C8H5N7O4P2	#N/A	#N/A	QP
1741	FALSE	325.02565@15.61-QP	#N/A	325.026	15.61	C11H9Cl2N7O	#N/A	#N/A	QP
1742	FALSE	325.07763@10.351-QP	#N/A	325.078	10.351	C19H17ClNP	#N/A	#N/A	QP
1743	FALSE	325.07811@2.985-QP	#N/A	325.078	2.985	C11H22NO4P3	#N/A	#N/A	QP
1744	FALSE	Bisoprolol@9.093-QP	Bisoprolol	325.224	9.093	C18H31NO4	2312	Other	QP
1745	FALSE	Didecyldimethylammonium@18.55-QP	Didecyldimethylammonium	325.37	18.55	C22H47N	#N/A	#N/A	QP
1746	FALSE	325.76804@1.037-QP	#N/A	325.768	1.037	#N/A	#N/A	#N/A	QP
1747	FALSE	325.94874@0.92-QP	#N/A	325.949	0.92	C7H10ClN4OP3S	#N/A	#N/A	QP
1748	FALSE	326.04729@2.346-QP	#N/A	326.047	2.346	C8H17N4O4P3	#N/A	#N/A	QP
1749	FALSE	326.11668@18.134-QP	#N/A	326.117	18.134	C6H21N10P3	#N/A	#N/A	QP
1750	FALSE	326.22281@14.283-QP	#N/A	326.223	14.283	C18H26N6	#N/A	#N/A	QP
1751	FALSE	LSD-d3@14.539-QP	LSD-d3	326.223	14.539	C20H22[2]H3N3O	#N/A	#N/A	QP
1752	FALSE	13,17-Dimethyl-17-propionyl-1,2,6,7,8,11,12,13,14,15,16,17-dodecahydro-3H-cyclopenta[a]phenanthren-3-one@17.692-QP	13,17-Dimethyl-17-propionyl-1,2,6,7,8,11,12,13,14,15,16,17-dodecahydro-3H-cyclopenta[a]phenanthren-3-one	326.224	17.692	C22H30O2	10442862	#N/A	QP
1753	FALSE	327.02714@0.953-QP	#N/A	327.027	0.953	C9H13NO10S	#N/A	#N/A	QP
1754	FALSE	Acetaminophenglucuronide@3.262-QP	Acetaminophenglucuronide	327.094	3.262	C14H17NO8	#N/A	#N/A	QP
1755	FALSE	L-Prolyl-L-arginylglycinamide@14.238-QP	L-Prolyl-L-arginylglycinamide	327.203	14.238	C13H25N7O3	149305	#N/A	QP
1756	FALSE	Cxa-10@12.164-QP	Cxa-10	327.24	12.164	C18H33NO4	21375709	#N/A	QP
1757	FALSE	327.37551@18.524-QP	#N/A	327.376	18.524	#N/A	#N/A	#N/A	QP
1758	FALSE	327.7651@1.04-QP	#N/A	327.765	1.04	#N/A	#N/A	#N/A	QP
1759	FALSE	327.99858@0.867-QP	#N/A	327.999	0.867	C15H8N2O3S2	#N/A	#N/A	QP
1760	FALSE	328.07777@1.463-QP	#N/A	328.078	1.463	C10H22N2O4P2S	#N/A	#N/A	QP
1761	FALSE	328.1324@19.207-QP	#N/A	328.132	19.207	C6H23N10P3	#N/A	#N/A	QP
1762	FALSE	Glycyl-L-prolyl-N~5~-(diaminomethylene)-L-ornithine@16.047-QP	Glycyl-L-prolyl-N~5~-(diaminomethylene)-L-ornithine	328.187	16.047	C13H24N6O4	149304	#N/A	QP
1763	FALSE	328.2383@17.481-QP	#N/A	328.238	17.481	C18H28N6	#N/A	#N/A	QP
1764	FALSE	328.23842@14.888-QP	#N/A	328.238	14.888	C18H28N6	#N/A	#N/A	QP
1765	FALSE	Docosahexaenoicacid@20.083-QP	Docosahexaenoicacid	328.238	20.083	C22H32O2	393183	Biosynthesis of unsaturated fatty acids	QP
1766	FALSE	328.23958@18.026-QP	#N/A	328.24	18.026	C16H33N4OP	#N/A	Biosynthesis of unsaturated fatty acids	QP
1767	FALSE	328.25943@21.446-QP	#N/A	328.259	21.446	C15H32N6O2	#N/A	#N/A	QP
1768	FALSE	1-palmitoleoylglycerol@18.587-QP	1-palmitoleoylglycerol	328.26	18.587	C19H36O4	#N/A	#N/A	QP
1769	FALSE	328.91537@1.005-QP	#N/A	328.915	1.005	C3H7Cl2N3O7P2	#N/A	#N/A	QP
1770	FALSE	329.12838@6.802-QP	#N/A	329.128	6.802	C11H19N7O3S	#N/A	#N/A	QP
1771	FALSE	329.15684@5.869-QP	#N/A	329.157	5.869	C16H28NO2PS	#N/A	#N/A	QP
1772	FALSE	CarnitineC11:0@12.777-QP	CarnitineC11:0	329.255	12.777	C18H35NO4	#N/A	#N/A	QP
1773	FALSE	329.76216@1.061-QP	#N/A	329.762	1.061	C2H2ClOP3S5	#N/A	#N/A	QP
1774	FALSE	329.92439@1.211-QP	#N/A	329.924	1.211	C6H6Cl2N4O4P2	#N/A	#N/A	QP
1775	FALSE	329.9939@0.976-QP	#N/A	329.994	0.976	C8H13ClN2O6P2	#N/A	#N/A	QP
1776	FALSE	330.00616@11.784-QP	#N/A	330.006	11.784	C9H18ClN2OP3S	#N/A	#N/A	QP
1777	FALSE	330.03033@0.909-QP	#N/A	330.03	0.909	C9H17ClN2O5P2	#N/A	#N/A	QP
1778	FALSE	330.0935@7.406-QP	#N/A	330.094	7.406	C18H18O4S	#N/A	#N/A	QP
1779	FALSE	D-Arabino-Hex-1-enopyranose,1-deoxy-,tetraacetate@3.363-QP	D-Arabino-Hex-1-enopyranose,1-deoxy-,tetraacetate	330.094	3.363	C14H18O9	2016482	#N/A	QP
1780	FALSE	2-[[4-(2-methoxyanilino)-6-(1-pyrrolidinyl)-1,3,5-triazin-2-yl]amino]ethanol@14.15-QP	2-[[4-(2-methoxyanilino)-6-(1-pyrrolidinyl)-1,3,5-triazin-2-yl]amino]ethanol	330.181	14.15	C16H22N6O2	5005996	#N/A	QP
1781	FALSE	2-[[4-(2-methoxyanilino)-6-(1-pyrrolidinyl)-1,3,5-triazin-2-yl]amino]ethanol@14.479-QP	2-[[4-(2-methoxyanilino)-6-(1-pyrrolidinyl)-1,3,5-triazin-2-yl]amino]ethanol	330.181	14.479	C16H22N6O2	5005996	#N/A	QP
1782	FALSE	(6beta,7beta)-7,12-Dihydroxy-6,20-epoxyabieta-8,11,13-trien-20-one@11.97-QP	(6beta,7beta)-7,12-Dihydroxy-6,20-epoxyabieta-8,11,13-trien-20-one	330.181	11.97	C20H26O4	16226220	#N/A	QP
1783	FALSE	330.23866@12.592-QP	#N/A	330.239	12.592	C14H30N6O3	#N/A	#N/A	QP
1784	FALSE	9,10,13-TriHOME@14.489-QP	9,10,13-TriHOME	330.24	14.489	C18H34O5	#N/A	Other	QP
1785	FALSE	all-cis-4,7,10,13,16-Docosapentaenoicacid@20.769-QP	all-cis-4,7,10,13,16-Docosapentaenoicacid	330.254	20.769	C22H34O2	#N/A	Biosynthesis of secondary metabolites;Biosynthesis of unsaturated fatty acids;Other	QP
1786	FALSE	all-cis-4,7,10,13,16-Docosapentaenoicacid@20.501-QP	all-cis-4,7,10,13,16-Docosapentaenoicacid	330.254	20.501	C22H34O2	#N/A	Biosynthesis of secondary metabolites;Biosynthesis of unsaturated fatty acids;Other	QP
1787	FALSE	330.25438@18.608-QP	#N/A	330.254	18.608	C16H35N4OP	#N/A	Biosynthesis of secondary metabolites;Biosynthesis of unsaturated fatty acids;Other	QP
1788	FALSE	330.27555@19.686-QP	#N/A	330.276	19.686	C15H34N6O2	#N/A	#N/A	QP
1789	FALSE	331.0354@7.345-QP	#N/A	331.035	7.345	C12H13NO8S	#N/A	#N/A	QP
1790	FALSE	331.10667@10.899-QP	#N/A	331.107	10.899	C13H14ClN9	#N/A	#N/A	QP
1791	FALSE	N-[1-(4-Methylbenzyl)-1H-benzimidazol-2-yl]-2-furamide@7.926-QP	N-[1-(4-Methylbenzyl)-1H-benzimidazol-2-yl]-2-furamide	331.132	7.926	C20H17N3O2	560588	ABC transporters	QP
1792	FALSE	3-hydroxydecanoylcarnitine@10.176-QP	3-hydroxydecanoylcarnitine	331.235	10.176	C17H33NO5	28639173	#N/A	QP
1793	FALSE	331.25829@20.5-QP	#N/A	331.258	20.5	C15H33N5O3	#N/A	#N/A	QP
1794	FALSE	Piptamine(antibiotic)@17.573-QP	Piptamine(antibiotic)	331.323	17.573	C23H41N	10605843	#N/A	QP
1795	FALSE	331.75922@1.051-QP	#N/A	331.759	1.051	#N/A	#N/A	#N/A	QP
1796	FALSE	332.08169@9.893-QP	#N/A	332.082	9.893	C12H12N8O2S	#N/A	#N/A	QP
1797	FALSE	332.0974@1.411-QP	#N/A	332.097	1.411	C11H16N4O8	#N/A	#N/A	QP
1798	FALSE	332.10661@6.705-QP	#N/A	332.107	6.705	C10H16N6O7	#N/A	#N/A	QP
1799	FALSE	3-Benzylthymidine@10.528-QP	3-Benzylthymidine	332.136	10.528	C17H20N2O5	8245249	#N/A	QP
1800	FALSE	332.14717@9.224-QP	#N/A	332.147	9.224	C19H26OP2	#N/A	#N/A	QP
1801	FALSE	332.18209@11.791-QP	#N/A	332.182	11.791	C12H24N6O5	#N/A	#N/A	QP
1802	FALSE	3-C-Carboxy-2-decyl-2,4-dideoxypentaricacid@12.28-QP	3-C-Carboxy-2-decyl-2,4-dideoxypentaricacid	332.182	12.28	C16H28O7	134205	#N/A	QP
1803	FALSE	14-deoxy-11,14-didehydroandrographolide@11.746-QP	14-deoxy-11,14-didehydroandrographolide	332.197	11.746	C20H28O4	#N/A	Metabolic pathways;Biosynthesis of secondary metabolites;Other	QP
1804	FALSE	14-deoxy-11,14-didehydroandrographolide@14.621-QP	14-deoxy-11,14-didehydroandrographolide	332.197	14.621	C20H28O4	#N/A	Metabolic pathways;Biosynthesis of secondary metabolites;Other	QP
1805	FALSE	14-deoxy-11,14-didehydroandrographolide@14.879-QP	14-deoxy-11,14-didehydroandrographolide	332.198	14.879	C20H28O4	#N/A	Metabolic pathways;Biosynthesis of secondary metabolites;Other	QP
1806	FALSE	Adrenicacid@21.204-QP	Adrenicacid	332.27	21.204	C22H36O2	#N/A	#N/A	QP
1807	FALSE	333.0995@6.236-QP	#N/A	333.099	6.236	C14H20ClNO6	#N/A	Metabolic pathways;Biosynthesis of secondary metabolites;Other	QP
1808	FALSE	Gamma-glutamyltryptophan@6.435-QP	Gamma-glutamyltryptophan	333.132	6.435	C16H19N3O5	#N/A	#N/A	QP
1809	FALSE	333.95686@1.33-QP	#N/A	333.957	1.33	C9H8N2O6P2S	#N/A	#N/A	QP
1810	FALSE	9-(3-Amino-3-deoxy-beta-D-xylofuranosyl)-N-cyclopentyl-9H-purin-6-amine@15.17-QP	9-(3-Amino-3-deoxy-beta-D-xylofuranosyl)-N-cyclopentyl-9H-purin-6-amine	334.176	15.17	C15H22N6O3	388622	#N/A	QP
1811	FALSE	334.21035@17.025-QP	#N/A	334.21	17.025	C16H26N6O2	#N/A	#N/A	QP
1812	FALSE	334.21095@18.821-QP	#N/A	334.211	18.821	C15H30N2O6	#N/A	#N/A	QP
1813	FALSE	334.21264@16.481-QP	#N/A	334.213	16.481	C17H37P3	#N/A	#N/A	QP
1814	FALSE	1886839@12.495-QP	1886839	334.213	12.495	C20H30O4	6528	Metabolic pathways;Biosynthesis of secondary metabolites;Other	QP
1815	FALSE	334.21272@15.369-QP	#N/A	334.213	15.369	C16H26N6O2	#N/A	#N/A	QP
1816	FALSE	13,14-dihydro-15-ketoProstaglandinA2@12.189-QP	13,14-dihydro-15-ketoProstaglandinA2	334.213	12.189	C20H30O4	#N/A	Metabolic pathways;Biosynthesis of secondary metabolites;Other	QP
1817	FALSE	335.04363@12.351-QP	#N/A	335.044	12.351	C13H6N9OP	#N/A	#N/A	QP
1818	FALSE	335.05492@9.63-QP	#N/A	335.055	9.63	C16H14ClNO5	#N/A	#N/A	QP
1819	FALSE	335.17291@12.953-QP	#N/A	335.173	12.953	C19H21N5O	#N/A	Biosynthesis of secondary metabolites;Biosynthesis of alkaloids derived from ornithine, lysine and nicotinic acid;Tropane, piperidine and pyridine alkaloid biosynthesis	QP
1820	FALSE	hydroxychloroquine@6.416-QP	hydroxychloroquine	335.176	6.416	C18H26ClN3O	3526	#N/A	QP
1821	FALSE	335.81851@0.967-QP	#N/A	335.819	0.967	C2H2Cl4N2O5P2	#N/A	#N/A	QP
1822	FALSE	336.15834@20.163-QP	#N/A	336.158	20.163	C14H21ClN8	#N/A	#N/A	QP
1823	FALSE	336.18142@19.416-QP	#N/A	336.181	19.416	C15H29ClN2O4	#N/A	#N/A	QP
1824	FALSE	acebutolol@8.152-QP	acebutolol	336.203	8.152	C18H28N2O4	1901	#N/A	QP
1825	FALSE	336.22585@19.649-QP	#N/A	336.226	19.649	C17H37O2PS	#N/A	#N/A	QP
1826	FALSE	11(R)-HPETE@13.918-QP	11(R)-HPETE	336.229	13.918	C20H32O4	7827809	Metabolic pathways;Bile secretion;Other	QP
1827	FALSE	336.24386@12.932-QP	#N/A	336.244	12.932	C24H32O	#N/A	#N/A	QP
1828	FALSE	336.26453@15.62-QP	#N/A	336.265	15.62	C17H32N6O	#N/A	#N/A	QP
1829	FALSE	Pregnanetriol@15.798-QP	Pregnanetriol	336.265	15.798	C21H36O3	92121	#N/A	QP
1830	FALSE	336.95958@0.836-QP	#N/A	336.96	0.836	C5H9NO12P2	#N/A	#N/A	QP
1831	FALSE	337.04207@1.013-QP	#N/A	337.042	1.013	C8H16ClNO11	#N/A	#N/A	QP
1832	FALSE	Z-Gln-Gly@6.727-QP	Z-Gln-Gly	337.126	6.727	C15H19N3O6	267278	#N/A	QP
1833	FALSE	Talampanel@8.04-QP	Talampanel	337.142	8.04	C19H19N3O3	144217	#N/A	QP
1834	FALSE	338.00273@13.721-QP	#N/A	338.003	13.721	C9H8N8OP2S	#N/A	#N/A	QP
1835	FALSE	338.15367@20.156-QP	#N/A	338.154	20.156	C14H28ClN2O3P	#N/A	#N/A	QP
1836	FALSE	N~8~-Butyl-9-pentofuranosyl-9H-purine-6,8-diamine@15.539-QP	N~8~-Butyl-9-pentofuranosyl-9H-purine-6,8-diamine	338.169	15.539	C14H22N6O4	2272128	#N/A	QP
1837	FALSE	resmethrin@12.711-QP	resmethrin	338.188	12.711	C22H26O3	4877	#N/A	QP
1838	FALSE	338.21088@18.522-QP	#N/A	338.211	18.522	C20H34S2	#N/A	Metabolic pathways;Biosynthesis of secondary metabolites;Other	QP
1839	FALSE	338.24142@20.757-QP	#N/A	338.241	20.757	C15H34N2O6	#N/A	#N/A	QP
1840	FALSE	338.24391@14.813-QP	#N/A	338.244	14.813	C16H30N6O2	#N/A	Metabolic pathways;Biosynthesis of secondary metabolites;Other	QP
1841	FALSE	6,13-Bis(hydroxymethyl)-2,6-dimethyltetracyclo[10.3.1.0~1,10~.0~2,7~]hexadecane-5,13-diol@17.333-QP	6,13-Bis(hydroxymethyl)-2,6-dimethyltetracyclo[10.3.1.0~1,10~.0~2,7~]hexadecane-5,13-diol	338.244	17.333	C20H34O4	2125	Metabolic pathways;Biosynthesis of secondary metabolites;Other	QP
1842	FALSE	338.25918@15.969-QP	#N/A	338.259	15.969	C18H35N4P	#N/A	#N/A	QP
1843	FALSE	3-(2,4-Cyclopentadien-1-ylidene)-5alpha-androstan-17beta-ol@14.418-QP	3-(2,4-Cyclopentadien-1-ylidene)-5alpha-androstan-17beta-ol	338.259	14.418	C24H34O	664975	#N/A	QP
1844	FALSE	glycidyloleate@16.545-QP	glycidyloleate	338.281	16.545	C21H38O3	4510739	#N/A	QP
1845	FALSE	339.03889@1.849-QP	#N/A	339.039	1.849	C12H6N9O2P	#N/A	#N/A	QP
1846	FALSE	339.1233@1.807-QP	#N/A	339.123	1.807	C11H17N9O2S	#N/A	#N/A	QP
1847	FALSE	3-[(1-Ethanimidoyl-3-pyrrolidinyl)sulfanyl]-6-(1-hydroxyethyl)-7-oxo-1-azabicyclo[3.2.0]hept-2-ene-2-carboxylicacid@10.564-QP	3-[(1-Ethanimidoyl-3-pyrrolidinyl)sulfanyl]-6-(1-hydroxyethyl)-7-oxo-1-azabicyclo[3.2.0]hept-2-ene-2-carboxylicacid	339.124	10.564	C15H21N3O4S	10792254	#N/A	QP
1848	FALSE	3-[(1-Ethanimidoyl-3-pyrrolidinyl)sulfanyl]-6-(1-hydroxyethyl)-7-oxo-1-azabicyclo[3.2.0]hept-2-ene-2-carboxylicacid@10.934-QP	3-[(1-Ethanimidoyl-3-pyrrolidinyl)sulfanyl]-6-(1-hydroxyethyl)-7-oxo-1-azabicyclo[3.2.0]hept-2-ene-2-carboxylicacid	339.124	10.934	C15H21N3O4S	10792254	#N/A	QP
1849	FALSE	339.24452@20.759-QP	#N/A	339.245	20.759	C19H34ClN3	#N/A	#N/A	QP
1850	FALSE	339.24502@21.329-QP	#N/A	339.245	21.329	C19H34ClN3	#N/A	#N/A	QP
1851	FALSE	339.94284@0.917-QP	#N/A	339.943	0.917	C7H12Cl2O7P2	#N/A	#N/A	QP
1852	FALSE	340.01308@13.656-QP	#N/A	340.013	13.656	C5H16Cl2N6O3P2	#N/A	#N/A	QP
1853	FALSE	340.0231@12.351-QP	#N/A	340.023	12.351	C17H8O8	#N/A	#N/A	QP
1854	FALSE	340.05884@0.902-QP	#N/A	340.059	0.902	C10H18N2O7P2	#N/A	Metabolic pathways;Biosynthesis of secondary metabolites;Other	QP
1855	FALSE	340.11415@9.412-QP	#N/A	340.114	9.412	C20H22OP2	#N/A	#N/A	QP
1856	FALSE	N'-Hydroxy-4-(hydroxyamino)-7-pentofuranosyl-7H-pyrrolo[2,3-d]pyrimidine-5-carboximidamide@7.253-QP	N'-Hydroxy-4-(hydroxyamino)-7-pentofuranosyl-7H-pyrrolo[2,3-d]pyrimidine-5-carboximidamide	340.114	7.253	C12H16N6O6	388872	#N/A	QP
1857	FALSE	Norethindroneacetate@15.984-QP	Norethindroneacetate	340.202	15.984	C22H28O3	#N/A	#N/A	QP
1858	FALSE	340.25724@18.489-QP	#N/A	340.257	18.489	C16H32N6O2	#N/A	#N/A	QP
1859	FALSE	340.25973@18.084-QP	#N/A	340.26	18.084	C16H32N6O2	#N/A	#N/A	QP
1860	FALSE	340.29611@21.225-QP	#N/A	340.296	21.225	C17H36N6O	#N/A	#N/A	QP
1861	FALSE	GlycidylStearate@17.445-QP	GlycidylStearate	340.296	17.445	C21H40O3	56394	#N/A	QP
1862	FALSE	4-(2,3-DICHLOROPHENYL)-1,4-DIHYDRO-2,6-DIMETHYL-3,5-PYRIDINEDICARBOXYLICACID@13.651-QP	4-(2,3-DICHLOROPHENYL)-1,4-DIHYDRO-2,6-DIMETHYL-3,5-PYRIDINEDICARBOXYLICACID	341.021	13.651	C15H13Cl2NO4	10809726	#N/A	QP
1863	FALSE	341.07261@10.768-QP	#N/A	341.073	10.768	C19H17ClNOP	#N/A	#N/A	QP
1864	FALSE	4,5-Dihydroxy-3,4,5-trimethyl-4,5,8,10,12,13,13a,13b-octahydro-2H-[1,6]dioxacycloundecino[2,3,4-gh]pyrrolizine-2,6(3H)-dione11-oxide@4.115-QP	4,5-Dihydroxy-3,4,5-trimethyl-4,5,8,10,12,13,13a,13b-octahydro-2H-[1,6]dioxacycloundecino[2,3,4-gh]pyrrolizine-2,6(3H)-dione11-oxide	341.146	4.115	C16H23NO7	4446776	#N/A	QP
1865	FALSE	4,5-Dihydroxy-3,4,5-trimethyl-4,5,8,10,12,13,13a,13b-octahydro-2H-[1,6]dioxacycloundecino[2,3,4-gh]pyrrolizine-2,6(3H)-dione11-oxide@4.419-QP	4,5-Dihydroxy-3,4,5-trimethyl-4,5,8,10,12,13,13a,13b-octahydro-2H-[1,6]dioxacycloundecino[2,3,4-gh]pyrrolizine-2,6(3H)-dione11-oxide	341.147	4.419	C16H23NO7	4446776	#N/A	QP
1866	FALSE	2-[4-(4-Nitrophenyl)-1-piperazinyl]-N-(2-pyridinyl)acetamide@1.869-QP	2-[4-(4-Nitrophenyl)-1-piperazinyl]-N-(2-pyridinyl)acetamide	341.148	1.869	C17H19N5O3	2206014	#N/A	QP
1867	FALSE	341.14997@10.741-QP	#N/A	341.15	10.741	C13H27NO7S	#N/A	#N/A	QP
1868	FALSE	341.25525@13.092-QP	#N/A	341.255	13.092	C15H31N7O2	#N/A	#N/A	QP
1869	FALSE	342.07612@11.376-QP	#N/A	342.076	11.376	C15H18O7S	#N/A	#N/A	QP
1870	FALSE	342.12947@7.48-QP	#N/A	342.129	7.48	C12H18N6O6	#N/A	#N/A	QP
1871	FALSE	2-(2-(Benzoyloxy)propoxy)propylbenzoate@12.757-QP	2-(2-(Benzoyloxy)propoxy)propylbenzoate	342.145	12.757	C20H22O5	80562	#N/A	QP
1872	FALSE	3-Ammonio-3-deoxy-beta-D-glucopyranosyl3-ammonio-3-deoxy-alpha-D-glucopyranoside@9.54-QP	3-Ammonio-3-deoxy-beta-D-glucopyranosyl3-ammonio-3-deoxy-alpha-D-glucopyranoside	342.164	9.54	C12H26N2O9	19992720	#N/A	QP
1873	FALSE	6470@11.973-QP	6470	342.182	11.973	C21H26O4	51499	#N/A	QP
1874	FALSE	342.21022@21.081-QP	#N/A	342.21	21.081	C9H30N10S2	#N/A	#N/A	QP
1875	FALSE	342.25457@22.056-QP	#N/A	342.255	22.056	C19H30N6	#N/A	#N/A	QP
1876	FALSE	Icosanedioicacid@18.825-QP	Icosanedioicacid	342.275	18.825	C20H38O4	68030	#N/A	QP
1877	FALSE	342.90967@1.015-QP	#N/A	342.91	1.015	C6H10Cl3NO5P2	#N/A	#N/A	QP
1878	FALSE	343.05842@5.002-QP	#N/A	343.058	5.002	C12H14N3O7P	#N/A	#N/A	QP
1879	FALSE	343.08864@3.265-QP	#N/A	343.089	3.265	C12H20N5OP3	#N/A	#N/A	QP
1880	FALSE	picoprazole@8.39-QP	picoprazole	343.098	8.39	C17H17N3O3S	64358	#N/A	QP
1881	FALSE	343.11919@17.543-QP	#N/A	343.119	17.543	C16H26NOPS2	#N/A	#N/A	QP
1882	FALSE	RabeprazoleSulfide@9.842-QP	RabeprazoleSulfide	343.134	9.842	C18H21N3O2S	8125607	#N/A	QP
1883	FALSE	CarnitineC12:0@13.958-QP	CarnitineC12:0	343.271	13.958	C19H37NO4	#N/A	#N/A	QP
1884	FALSE	5-O-galloylquinicacid@5.113-QP	5-O-galloylquinicacid	344.073	5.113	C14H16O10	#N/A	#N/A	QP
1885	FALSE	344.08278@12.362-QP	#N/A	344.083	12.362	C11H17N6O3PS	#N/A	#N/A	QP
1886	FALSE	Ethyl[4-(4-chlorophenyl)-2-methyl-1,2,3,4-tetrahydro-8-isoquinolinyl]carbamate@12.27-QP	Ethyl[4-(4-chlorophenyl)-2-methyl-1,2,3,4-tetrahydro-8-isoquinolinyl]carbamate	344.128	12.27	C19H21ClN2O2	128874	#N/A	QP
1887	FALSE	11-dehydrocorticosterone@12.709-QP	11-dehydrocorticosterone	344.197	12.709	C21H28O4	#N/A	Other	QP
1888	FALSE	tp@17.687-QP	tp	344.234	17.687	C22H32O3	5774	#N/A	QP
1889	FALSE	344.26594@13.138-QP	#N/A	344.266	13.138	C18H36N2O4	#N/A	#N/A	QP
1890	FALSE	345.06698@4.204-QP	#N/A	345.067	4.204	C10H21ClN3O4PS	#N/A	#N/A	QP
1891	FALSE	345.11131@10.746-QP	#N/A	345.111	10.746	C14H16N7O2P	#N/A	#N/A	QP
1892	FALSE	Omeprazole@10.179-QP	Omeprazole	345.114	10.179	C17H19N3O3S	4433	#N/A	QP
1893	FALSE	3-(3-Amino-3-carboxypropyl)uridine@1.379-QP	3-(3-Amino-3-carboxypropyl)uridine	345.117	1.379	C13H19N3O8	149669	#N/A	QP
1894	FALSE	N-Benzyl-2-[(phenylcarbamoyl)amino]benzamide@8.087-QP	N-Benzyl-2-[(phenylcarbamoyl)amino]benzamide	345.147	8.087	C21H19N3O2	783354	#N/A	QP
1895	FALSE	O-sebacoylcarnitine@8.823-QP	O-sebacoylcarnitine	345.214	8.823	C17H31NO6	59654115	#N/A	QP
1896	FALSE	346.11233@6.484-QP	#N/A	346.112	6.484	C12H18N4O8	#N/A	#N/A	QP
1897	FALSE	346.16066@6.055-QP	#N/A	346.161	6.055	C20H28OP2	#N/A	#N/A	QP
1898	FALSE	346.16066@7.504-QP	#N/A	346.161	7.504	C20H28OP2	#N/A	#N/A	QP
1899	FALSE	(4R,4aR,6R,7R,7aS)-4,7-Dimethyl-1-oxooctahydrocyclopenta[c]pyran-6-ylbeta-D-glucopyranoside@9.006-QP	(4R,4aR,6R,7R,7aS)-4,7-Dimethyl-1-oxooctahydrocyclopenta[c]pyran-6-ylbeta-D-glucopyranoside	346.161	9.006	C16H26O8	8172609	#N/A	QP
1900	FALSE	(4R,4aR,6R,7R,7aS)-4,7-Dimethyl-1-oxooctahydrocyclopenta[c]pyran-6-ylbeta-D-glucopyranoside@7.251-QP	(4R,4aR,6R,7R,7aS)-4,7-Dimethyl-1-oxooctahydrocyclopenta[c]pyran-6-ylbeta-D-glucopyranoside	346.162	7.251	C16H26O8	8172609	#N/A	QP
1901	FALSE	GibberellinA24@12.582-QP	GibberellinA24	346.176	12.582	C20H26O5	#N/A	Metabolic pathways;Biosynthesis of secondary metabolites;Other	QP
1902	FALSE	346.19582@8.759-QP	#N/A	346.196	8.759	C13H26N6O5	#N/A	#N/A	QP
1903	FALSE	346.21247@18.025-QP	#N/A	346.212	18.025	C18H37P3	#N/A	#N/A	QP
1904	FALSE	11-deoxycortisol@13.319-QP	11-deoxycortisol	346.213	13.319	C21H30O4	#N/A	Metabolic pathways;Other	QP
1905	FALSE	346.21318@10.705-QP	#N/A	346.213	10.705	C17H26N6O2	#N/A	Metabolic pathways;Other	QP
1906	FALSE	Sorbitanlaurate@12.506-QP	Sorbitanlaurate	346.235	12.506	C18H34O6	9820681	#N/A	QP
1907	FALSE	346.24888@17.028-QP	#N/A	346.249	17.028	C18H30N6O	#N/A	Biosynthesis of secondary metabolites;Other	QP
1908	FALSE	Ginkgoicacid@18.025-QP	Ginkgoicacid	346.25	18.025	C22H34O3	4445152	Biosynthesis of secondary metabolites;Other	QP
1909	FALSE	IstamycinC0@19.59-QP	IstamycinC0	346.26	19.59	C16H34N4O4	26362414	#N/A	QP
1910	FALSE	Cefalexin@9.942-QP	Cefalexin	347.092	9.942	C16H17N3O4S	25541	#N/A	QP
1911	FALSE	347.09511@3.59-QP	#N/A	347.095	3.59	C12H17N3O9	#N/A	#N/A	QP
1912	FALSE	7-(alpha-Hydroxy-alpha-phenylacetamido)-3-methyl-3-cephem-4-carboxylicacid@2.498-QP	7-(alpha-Hydroxy-alpha-phenylacetamido)-3-methyl-3-cephem-4-carboxylicacid	348.077	2.498	C16H16N2O5S	20158192	#N/A	QP
1913	FALSE	348.08034@1.052-QP	#N/A	348.08	1.052	C15H21ClO5S	#N/A	#N/A	QP
1914	FALSE	348.10635@15.655-QP	#N/A	348.106	15.655	C10H25ClN4O3S2	#N/A	#N/A	QP
1915	FALSE	348.11497@1.606-QP	#N/A	348.115	1.606	C15H25O5PS	#N/A	#N/A	QP
1916	FALSE	GibberellinA14@14.099-QP	GibberellinA14	348.192	14.099	C20H28O5	#N/A	Metabolic pathways;Biosynthesis of secondary metabolites;Other	QP
1917	FALSE	348.26442@16.858-QP	#N/A	348.264	16.858	C18H32N6O	#N/A	#N/A	QP
1918	FALSE	Anacardicacid@18.581-QP	Anacardicacid	348.265	18.581	C22H36O3	#N/A	#N/A	QP
1919	FALSE	N-({2-[(2-Methoxyphenoxy)acetyl]hydrazino}carbonothioyl)-2-furamide@3.268-QP	N-({2-[(2-Methoxyphenoxy)acetyl]hydrazino}carbonothioyl)-2-furamide	349.075	3.268	C15H15N3O5S	1385654	#N/A	QP
1920	FALSE	349.07666@3.269-QP	#N/A	349.077	3.269	C11H15N3O10	#N/A	#N/A	QP
1921	FALSE	6-{[Amino(phenyl)acetyl]amino}-3,3-dimethyl-7-oxo-4-thia-1-azabicyclo[3.2.0]heptane-2-carboxylicacid@8.89-QP	6-{[Amino(phenyl)acetyl]amino}-3,3-dimethyl-7-oxo-4-thia-1-azabicyclo[3.2.0]heptane-2-carboxylicacid	349.108	8.89	C16H19N3O4S	2089	#N/A	QP
1922	FALSE	PenicillinT@9.898-QP	PenicillinT	349.108	9.898	C16H19N3O4S	391589	#N/A	QP
1923	FALSE	349.10839@9.248-QP	#N/A	349.108	9.248	C12H15N9O2S	#N/A	#N/A	QP
1924	FALSE	349.11391@13.153-QP	#N/A	349.114	13.153	C14H26NO3P3	#N/A	#N/A	QP
1925	FALSE	349.23878@13.673-QP	#N/A	349.239	13.673	#N/A	#N/A	#N/A	QP
1926	FALSE	349.81261@0.951-QP	#N/A	349.813	0.951	C3H8BrCl3N2P2S	#N/A	#N/A	QP
1927	FALSE	349.99303@0.887-QP	#N/A	349.993	0.887	C7H16N2O6P2S2	#N/A	#N/A	QP
1928	FALSE	350.00766@8.66-QP	#N/A	350.008	8.66	C19H12OP2S	#N/A	#N/A	QP
1929	FALSE	350.02222@4.281-QP	#N/A	350.022	4.281	C11H14N2O7S2	#N/A	#N/A	QP
1930	FALSE	350.04406@12.788-QP	#N/A	350.044	12.788	C20H16P2S	#N/A	#N/A	QP
1931	FALSE	350.07887@3.276-QP	#N/A	350.079	3.276	C13H24N2OP2S2	#N/A	Other	QP
1932	FALSE	350.08188@2.321-QP	#N/A	350.082	2.321	C10H25O7P3	#N/A	#N/A	QP
1933	FALSE	Andrographolide@10.461-QP	Andrographolide	350.208	10.461	C20H30O5	#N/A	#N/A	QP
1934	FALSE	nitropyrrolinA@20.052-QP	nitropyrrolinA	350.22	20.052	C19H30N2O4	554045	#N/A	QP
1935	FALSE	350.24143@20.378-QP	#N/A	350.241	20.378	C17H30N6O2	#N/A	#N/A	QP
1936	FALSE	350.99608@0.89-QP	#N/A	350.996	0.89	C6H6N7O9P	#N/A	#N/A	QP
1937	FALSE	Meloxicam@9.19-QP	Meloxicam	351.033	9.19	C14H13N3O4S2	10442740	#N/A	QP
1938	FALSE	1-[(2R,3R)-2-(Hydroxymethyl)-3-phenyl-6-(2-pyridinylcarbonyl)-1,6-diazaspiro[3.3]hept-1-yl]ethanone@8.337-QP	1-[(2R,3R)-2-(Hydroxymethyl)-3-phenyl-6-(2-pyridinylcarbonyl)-1,6-diazaspiro[3.3]hept-1-yl]ethanone	351.157	8.337	C20H21N3O3	58160187	#N/A	QP
1939	FALSE	SenecionineN-oxide@14.766-QP	SenecionineN-oxide	351.168	14.766	C18H25NO6	#N/A	Tropane, piperidine and pyridine alkaloid biosynthesis	QP
1940	FALSE	351.16946@19.638-QP	#N/A	351.169	19.638	C13H27Cl2N7	#N/A	Metabolic pathways;Biosynthesis of secondary metabolites;Biosynthesis of alkaloids derived from shikimate pathway;Tropane, piperidine and pyridine alkaloid biosynthesis;Other	QP
1941	FALSE	Sphingosine-1-phosphate(d16:1)@13.449-QP	Sphingosine-1-phosphate(d16:1)	351.216	13.449	C16H34NO5P	30778523	#N/A	QP
1942	FALSE	352.13813@1.834-QP	#N/A	352.138	1.834	C15H20N4O6	#N/A	#N/A	QP
1943	FALSE	N,N-Bis[(3,5-dimethyl-1H-pyrazol-1-yl)methyl]-N',N'-dimethyl-1,4-benzenediamine@13.397-QP	N,N-Bis[(3,5-dimethyl-1H-pyrazol-1-yl)methyl]-N',N'-dimethyl-1,4-benzenediamine	352.238	13.397	C20H28N6	2036363	#N/A	QP
1944	FALSE	352.25932@20.815-QP	#N/A	352.259	20.815	C17H32N6O2	#N/A	#N/A	QP
1945	FALSE	353.01737@6.429-QP	#N/A	353.017	6.429	C7H18NO9P3	#N/A	#N/A	QP
1946	FALSE	Aceclofenac@11.179-QP	Aceclofenac	353.021	11.179	C16H13Cl2NO4	64809	#N/A	QP
1947	FALSE	353.06278@11.798-QP	#N/A	353.063	11.798	C15H12N7PS	#N/A	#N/A	QP
1948	FALSE	353.09157@12.215-QP	#N/A	353.092	12.215	C12H15N7O4S	#N/A	#N/A	QP
1949	FALSE	353.10313@10.598-QP	#N/A	353.103	10.598	C15H19N3O5S	#N/A	#N/A	QP
1950	FALSE	353.1352@13.666-QP	#N/A	353.135	13.666	C16H26N3P3	#N/A	#N/A	QP
1951	FALSE	Dihydrozeatinriboside@1.361-QP	Dihydrozeatinriboside	353.169	1.361	C15H23N5O5	#N/A	Biosynthesis of secondary metabolites;Other	QP
1952	FALSE	354.03755@12.353-QP	#N/A	354.038	12.353	C11H10N6O6S	#N/A	#N/A	QP
1953	FALSE	354.03825@0.954-QP	#N/A	354.038	0.954	C12H6N10O2S	#N/A	#N/A	QP
1954	FALSE	Dihydronaringenin-O-sulphate@11.523-QP	Dihydronaringenin-O-sulphate	354.039	11.523	C15H14O8S	17216223	#N/A	QP
1955	FALSE	354.04788@16.728-QP	#N/A	354.048	16.728	C6H14N10O2S3	#N/A	#N/A	QP
1956	FALSE	354.0745@0.916-QP	#N/A	354.075	0.916	C11H20N2O7P2	#N/A	#N/A	QP
1957	FALSE	(2S,5'R)-7-chloro-3',4,6-trimethoxy-5'-methylspiro[benzofuran-2,4'-cyclohexane]-1',3-dione@13.712-QP	(2S,5'R)-7-chloro-3',4,6-trimethoxy-5'-methylspiro[benzofuran-2,4'-cyclohexane]-1',3-dione	354.088	13.712	C17H19ClO6	5145918	#N/A	QP
1958	FALSE	354.08895@6.706-QP	#N/A	354.089	6.706	C15H20N2O4P2	#N/A	#N/A	QP
1959	FALSE	354.11476@1.837-QP	#N/A	354.115	1.837	C13H22O11	#N/A	#N/A	QP
1960	FALSE	dCAdoMet@19.65-QP	dCAdoMet	354.148	19.65	C14H22N6O3S	#N/A	Other	QP
1961	FALSE	354.15196@18.119-QP	#N/A	354.152	18.119	C15H30O5S2	#N/A	#N/A	QP
1962	FALSE	piperazine,1,4-bis(phenoxyacetyl)-@9.428-QP	piperazine,1,4-bis(phenoxyacetyl)-	354.158	9.428	C20H22N2O4	871325	#N/A	QP
1963	FALSE	VALGANCICLOVIR,(R)-@12.111-QP	VALGANCICLOVIR,(R)-	354.166	12.111	C14H22N6O5	99299	#N/A	QP
1964	FALSE	354.21771@19.287-QP	#N/A	354.218	19.287	C17H31N4O2P	#N/A	#N/A	QP
1965	FALSE	354.25401@12.238-QP	#N/A	354.254	12.238	C20H30N6	#N/A	#N/A	QP
1966	FALSE	354.25401@15.913-QP	#N/A	354.254	15.913	C20H30N6	#N/A	#N/A	QP
1967	FALSE	(2E,6Z,9Z,12Z,15Z,18Z,21Z)-tetracosaheptaenoicacid@14.175-QP	(2E,6Z,9Z,12Z,15Z,18Z,21Z)-tetracosaheptaenoicacid	354.254	14.175	C24H34O2	57971834	#N/A	QP
1968	FALSE	354.2545@14.672-QP	#N/A	354.255	14.672	C20H30N6	#N/A	#N/A	QP
1969	FALSE	354.27516@21.726-QP	#N/A	354.275	21.726	C17H34N6O2	#N/A	#N/A	QP
1970	FALSE	354.3481@24.893-QP	#N/A	354.348	24.893	C19H42N6	#N/A	#N/A	QP
1971	FALSE	355.0875@1.816-QP	#N/A	355.087	1.816	C11H13N7O7	#N/A	#N/A	QP
1972	FALSE	emiglitate@5.416-QP	emiglitate	355.162	5.416	C17H25NO7	65003	#N/A	QP
1973	FALSE	emiglitate@6.023-QP	emiglitate	355.162	6.023	C17H25NO7	65003	#N/A	QP
1974	FALSE	355.2708@13.907-QP	#N/A	355.271	13.907	C16H33N7O2	#N/A	#N/A	QP
1975	FALSE	356.01795@8.963-QP	#N/A	356.018	8.963	C17H8O9	#N/A	#N/A	QP
1976	FALSE	356.07741@6.489-QP	#N/A	356.077	6.489	C16H22O3P2S	#N/A	#N/A	QP
1977	FALSE	356.07833@4.905-QP	#N/A	356.078	4.905	C13H16N4O6S	#N/A	#N/A	QP
1978	FALSE	2,3-Diphenyl-5,6,7,8-tetrahydrothieno[2,3-b]quinolin-4-amine@2.963-QP	2,3-Diphenyl-5,6,7,8-tetrahydrothieno[2,3-b]quinolin-4-amine	356.133	2.963	C23H20N2S	9804590	#N/A	QP
1979	FALSE	NS-2710@20.753-QP	NS-2710	356.163	20.753	C22H20N4O	8039216	#N/A	QP
1980	FALSE	Methyl(19S)-12,19-dihydroxy-2,16-didehydrocuran-17-oate@10.739-QP	Methyl(19S)-12,19-dihydroxy-2,16-didehydrocuran-17-oate	356.173	10.739	C20H24N2O4	26390501	#N/A	QP
1981	FALSE	Estradiol,diacetate@12.71-QP	Estradiol,diacetate	356.198	12.71	C22H28O4	59804	#N/A	QP
1982	FALSE	356.23328@17.956-QP	#N/A	356.233	17.956	C19H28N6O	#N/A	#N/A	QP
1983	FALSE	356.2338@19.551-QP	#N/A	356.234	19.551	C19H28N6O	#N/A	#N/A	QP
1984	FALSE	356.26951@21.037-QP	#N/A	356.27	21.037	C20H32N6	#N/A	#N/A	QP
1985	FALSE	Docosahexaenoicacidethylester@14.827-QP	Docosahexaenoicacidethylester	356.27	14.827	C24H36O2	#N/A	#N/A	QP
1986	FALSE	Docosahexaenoicacidethylester@16.003-QP	Docosahexaenoicacidethylester	356.27	16.003	C24H36O2	#N/A	#N/A	QP
1987	FALSE	356.26993@15.299-QP	#N/A	356.27	15.299	C20H32N6	#N/A	#N/A	QP
1988	FALSE	MFCD00056293@13.061-QP	MFCD00056293	356.27	13.061	C24H36O2	4903459	#N/A	QP
1989	FALSE	Docosahexaenoicacidethylester@14.58-QP	Docosahexaenoicacidethylester	356.27	14.58	C24H36O2	#N/A	#N/A	QP
1990	FALSE	Docosahexaenoicacidethylester@14.069-QP	Docosahexaenoicacidethylester	356.27	14.069	C24H36O2	#N/A	#N/A	QP
1991	FALSE	356.29099@22.854-QP	#N/A	356.291	22.854	C17H36N6O2	#N/A	#N/A	QP
1992	FALSE	357.07695@8.992-QP	#N/A	357.077	8.992	C11H16N7O3PS	#N/A	#N/A	QP
1993	FALSE	2-amino-6-methyl-3-(3,4,5-trimethoxybenzoyl)benzo(b)thiophene@5.69-QP	2-amino-6-methyl-3-(3,4,5-trimethoxybenzoyl)benzo(b)thiophene	357.104	5.69	C19H19NO4S	17625719	Other	QP
1994	FALSE	357.16577@20.817-QP	#N/A	357.166	20.817	C12H28N3O7P	#N/A	#N/A	QP
1995	FALSE	Laudanosine@8.991-QP	Laudanosine	357.193	8.991	C21H27NO4	66114	#N/A	QP
1996	FALSE	357.24992@11.556-QP	#N/A	357.25	11.556	C15H31N7O3	#N/A	#N/A	QP
1997	FALSE	357.27324@14.58-QP	#N/A	357.273	14.58	C17H35N5O3	#N/A	#N/A	QP
1998	FALSE	357.27332@15.955-QP	#N/A	357.273	15.955	C17H35N5O3	#N/A	#N/A	QP
[truncated: 2,278 more rows]

## Sheet: Area
Supplementary Table 2. Untargeted metabolomics.
	Control.4_1	Control.6_2	Control.8_4	Control.12_6	Control.16_10	Control.17_11	Control.19_13	Control.20_14	Control.21_15	Control.22_16	Control.24_17	Control.27_21	Control.28_22	Control.29_23	Control.31_25	Control.32_26	Control.34_27	Control.35_28	Control.36_29	Control.37_30	Control.38_31	Control.39_32	Control.41_34	Control.49_38	Control.50_39	Control.51_40	Control.53_41	Control.57_42	Control.58_43	Control.70_46	Control.91_48	Control.100_49	Control.101_50	Control.102_51	Control.103_52	Control.104_53	Control.105_54	Control.106_55	Control.107_56	Control.109_57	Control.111_58	Control.114_59	Control.115_60	Control.116_61	Control.121_62	Control.122_63	Control.123_64	Control.126_65	Control.127_66
Nitrosobenzene@9.494-QP	82413.9	83900.8	82113.7	85116.2	86879.2	82811	81740	87953.7	86427.9	81912.2	83172.8	85693	1.322e+06	91295.1	86477	83195.8	80925.1	84929.1	81436	85269.4	77833.4	75665.4	80127.8	84069.8	82433.5	80545	77554.5	87347.2	82984.3	81045.6	80790.2	83305.2	4.63686e+06	78239.1	83670.1	81845	85094.6	93738.5	86540.7	83052.5	83048.6	70338.1	79919.7	79654.6	87232.2	81248	84181.1	50602.6	54707.7
4&#39-Aminoacetophenone@10.411-QP	33480.6	40832.2	29527.6	208159	121486	30898.2	62522	73868.4	22168.5	259139	121371	248677	5.39516e+06	147771	61879.2	113364	36987.4	33954.6	60690.5	66767.3	90511.9	25522.6	28702.1	114772	125237	50865.8	72631.4	58068.2	37602.8	112943	76228.6	28053.3	1.95435e+07	40105.6	38532	122631	235289	31646.9	172449	146324	118687	54978.5	1.64847e+06	31160	71340.9	90042	180084	172757	116989
2-amino-3-methylbenzoicacid@10.412-QP	73133.1	40665.5	682284	92931.9	70194.4	28171.3	45674.4	112924	175492	81762.6	37694.8	193755	1.34958e+06	1.57177e+06	149246	146695	120413	118953	84071.4	122566	72598.5	73440.9	59418.4	74317.4	75144.8	86512.3	210048	88761.7	30495.5	117174	898932	402569	4.84135e+06	142830	737534	182245	112972	98323.7	149094	693718	624630	301522	151435	165430	125131	121652	90858.4	126324	107093
NSC95113@14.543-QP	90156.3	109853	103131	123004	121857	114799	140477	112605	82745.9	98173.3	102759	113500	110604	150363	108133	104295	100874	105488	110144	103422	89079.6	94443.3	105691	102356	108066	93022.2	96929.1	90335.4	91190.2	99024.4	97229.5	90440.4	96500.8	93183.8	144470	102311	104386	111256	99917.9	80392.5	86110.2	70576.4	200547	104907	101400	116829	100371	91191.7	90350.5
174.57742@7.201-QP	43732.1	45061.2	44859.1	46729	44165.5	44617.9	63457.8	47933	41389.2	47259.9	46287.2	42134.9	54474.1	70938.7	46577.4	46597.8	42783.9	42749.7	42568.7	41747.1	41736.6	40564.1	45926.8	45192.1	48735.2	41557.5	45936.5	44369.7	46922.2	51417	50440.6	41255.3	84066.2	43333.8	41797.1	44104.1	46846.5	66858.2	50019.1	50622.4	51993.4	43159.9	46059.1	40389.9	48514.5	45544.7	48954.8	38964.1	52677.8
255.60405@6.722-QP	111814	40398.1	25510.7	65959.4	34893	25197.8	27869.3	41407.1	23420.5	71384.3	38216.2	29181.8	33060.4	35459.5	60054.2	69654.6	31265.4	79026.9	26255.3	22578.5	29752.3	23199.7	82881.1	88623	31225.4	26666.3	31799.4	24756	52956.3	29589.2	33394.8	24555.5	38293.9	29718.7	42090.4	46300.4	25619.8	34703	26224.6	25869.7	24975.8	25034.3	24037.2	21112.1	22180.4	37109.9	87259.1	29695.9	33020.2
6336217@7.074-QP	76824.7	96657.4	83950.5	91389	54953.8	73125.9	94116.5	79657.8	56058.5	66879.6	63996.1	68282.5	1.92224e+07	120021	70085.6	124663	96250	72733.5	53200.5	64763.4	62198.2	64972.6	103533	79358.8	71316.6	75200.4	91585	102976	99521.4	107979	75582.2	58826.5	3.74725e+07	80068.5	68636.4	423605	455872	146144	110701	79235.2	117995	59995.9	109358	80851.4	213813	99615.6	506824	165995	104204
278.08164@8.284-QP	32134.5	43166	32206.1	30442	32678.1	25538.5	37195	40067.8	19649.7	28246.9	42313.9	38866.4	49391.2	36474.3	34428	37197.6	29544.5	26269.7	28331.6	28451.2	22622.1	22107.2	29812.8	34913.1	30315.7	24652	37005.4	26622.8	45164.8	32471.7	32548.9	36860.5	114162	35762.4	31578.2	41659.3	30495.5	27278.2	38338.3	43184.3	61976.7	41283.8	40366.8	30447.2	34733	31277.2	40545.6	29361.3	34721.8
283.04792@9.957-QP	63560.9	102086	95301.4	69581.5	49082.9	70612.9	2.88479e+07	89561.6	1.07546e+06	38947.3	45248.2	103685	69347.8	80594.5	94896	62626.7	84273	63634	50586.1	60468.1	38519.8	53242.8	64249	55976.7	65738.1	51884.6	104064	68829.1	92437.4	74416	62622.7	65582.8	9.21129e+07	75678.5	48958.3	9.11912e+07	75970.4	35623.2	62530	82526.8	61057.4	80331.1	72237.7	57567.4	52441.8	40517	55462.9	56818.4	41316.5
metominostrobin@14.765-QP	1.02966e+06	497285	1.40573e+06	209453	742538	586013	2.11345e+06	404943	102687	533293	448410	1.2654e+06	1.11464e+06	1.10585e+06	703871	1.32786e+06	826127	411070	725880	3.60312e+06	1.09377e+06	326533	764161	2.31171e+06	3.17118e+06	552571	555340	273113	980649	514680	1.18954e+06	603087	984208	389824	1.06288e+06	1.69273e+06	1.62817e+06	565329	762770	2.61704e+06	199271	259063	1.08461e+06	645483	411446	611101	455398	442279	445671
NPPB@10.583-QP	77921	149981	154796	256211	128699	57379.1	245454	192660	47453.4	169901	43790.9	305724	54566.4	94293.8	128893	58564.3	154126	260965	173690	250117	186426	94154.6	63256.4	195305	155109	49265.7	134738	38688	106150	210285	146558	237460	166975	161734	376624	40059.7	184570	360792	238184	70135.5	58978.8	121981	1.90622e+06	117911	98926.1	167813	218462	227244	176559
303.15003@7.2-QP	22938.4	23635.5	23529.5	24510.3	23165.7	24314.8	33284.9	23388.5	22280.6	24788.8	24278.6	22100.6	28572.8	37208.8	24430.8	24441.5	22441	22423	22328.1	21897.2	21891.7	21276.7	24089.5	23704.1	25562.6	21797.8	24094.6	23272.8	24611.6	26969.2	26457.1	21639.2	52517.3	22729.5	21923.4	23133.5	24571.9	32921.2	26236	26552.4	27271.6	22638.2	24158.9	21185.3	25459.5	24373.8	25677.8	20437.5	27630.5
alpha-tyvelopyranosyl-(1->3)-alpha-D-mannopyranose@6.705-QP	654503	15132576	146343	311317	201713	133937	617210	307232	111903	503017	568872	1.48375e+07	668476	849313	292603	648514	196421	361962	209878	190026	2.22097e+06	226884	429793	379510	159257	134686	394485	414787	722784	2.81717e+06	1.2512e+06	122388	249632	384460	188441	608123	454478	3.25757e+06	348683	208213	242995	162697	475417	2.30211e+06	591782	358928	376142	2.65868e+06	189806
335.05325@9.515-QP	118426	151715	132485	130996	127534	151537	144173	163661	111695	117928	113557	1.98008e+07	1.41392e+07	131072	132240	115898	129729	168887	121031	124877	108285	109869	119511	119566	119136	103180	133266	128842	131069	115432	135822	128161	2.18393e+07	140533	123565	126735	127989	126476	133447	130542	126468	115670	142507	129674	133107	106186	125575	92262.4	84954.9
Pancopride@7.199-QP	63008.1	72435.5	77576.1	73657.5	60468.4	68199.9	90806.8	72738	57839.7	71607.8	70099.8	61813.4	78858.4	103969	64544.4	75908.7	69367.7	65418.8	58844.4	60304.6	59636.6	60019.9	78873.6	71009.4	70080.1	63702.9	72297.3	75082.8	66570.3	86882.2	81958.6	59071.3	110549	67307.7	63826	72106.8	79021.3	115051	89109.7	85914.9	91426.3	67926.7	74559.8	65542.4	68694.7	73638.8	71173.6	54942.3	86405.2
3,6-di-O-methyl-beta-D-glucopyranosyl-(1->4)-alpha-L-rhamnopyranose@7.331-QP	507572	1.05142e+07	194485	145038	208624	171701	576740	231481	129236	437603	538254	1.12946e+07	615181	727030	188531	397337	148635	190571	192553	210691	3.15012e+06	236195	157274	194873	174849	186356	306695	196593	551768	2.2845e+06	1.03383e+06	131823	242662	239765	136645	411750	266855	2.46713e+06	206206	160026	171283	145222	139137	1.65606e+06	533525	176575	158054	3.81038e+06	157226
398.11496@7.343-QP	64864.6	174098	71008.4	66415.7	76512.5	61428.5	84311.5	62423.6	60321.1	65333.8	75335.5	456139	65778.8	79758.6	59739.8	66938.8	63884.5	58686.8	56074.1	59042.3	66071.5	56156.6	64422.8	67101.1	65108	56484.6	68436.8	60743.6	61147	69799.7	76002.4	55740.8	67997.1	59209	58752.7	57937.3	74387.5	100542	71253.5	70868.9	73293.2	61544.5	62956	74981	63445.5	62383.3	64623.3	87747.7	70451.2
398.17741@7.77-QP	287553	3.23298e+06	100312	77326.9	84459.2	70777.1	195918	142374	56860.7	197838	191590	4.15576e+06	303127	295329	106895	254068	134160	113069	64427.2	68676.8	1.56556e+06	114857	103170	98312.8	64291.6	74156.5	123628	97057	133480	1.1511e+06	161871	102538	266423	148055	80425	220695	135102	1.12903e+06	94392.4	97377.6	103751	89902.8	146956	467359	239412	116126	124743	2.16478e+06	103907
442.20334@8.141-QP	2.46377e+06	5.40495e+06	2.90738e+06	2.07773e+06	381070	1.46581e+06	3.97684e+06	1.07073e+06	200088	476127	2.50995e+06	2.67429e+06	748964	1.34688e+06	3.54425e+06	2.0478e+06	1.28715e+06	350547	358887	245595	1.7227e+06	393503	665200	358926	158669	971812	2.13542e+06	621293	1.03929e+06	1.81505e+06	227878	701423	1.6418e+06	669007	581094	659960	940596	1.17679e+06	572736	795562	644559	976246	1.17529e+06	306943	587014	316757	468300	1.59185e+06	353766
446.2059@10.422-QP	209632	298592	158854	98119.7	422211	319878	114671	417485	71354.1	82822.1	166391	3.57274e+08	192180	101936	209592	220753	178804	91022.9	252512	134394	109235	78478.5	81317.3	222537	118760	431359	93945.7	148811	237848	488592	83942.9	298727	1.53937e+06	119378	589013	85189.8	397132	866126	547856	156949	141062	436748	259524	189877	220251	364684	114819	2.35581e+06	345535
464.18487@8.143-QP	197438	1.13044e+06	60365.3	60044.9	77609.7	43465.6	161188	77943.7	34335.3	89066.9	144556	910305	145891	80185.1	83547.7	211160	78529.3	48780.3	37597.8	37059.1	358971	40392.9	54944.3	65513.3	38836.2	62552.8	96712.4	50960.8	161286	434248	43371.7	191278	361680	125483	82034	166774	75630.7	209553	114372	113708	179797	91268.5	349650	129083	183048	67850.6	117895	426326	95379.5
492.2917@13.978-QP	881079	784650	1.3777e+06	690508	85270.3	93180.6	124669	80921.7	68694.7	1.15427e+06	490728	413790	849946	199922	77356.5	400930	296291	122014	88539.6	329414	80219.4	79005.1	167656	86172.4	134613	86122.4	1.05088e+06	331018	106899	91321.9	164626	93973.6	99860.6	350039	481940	138814	89042	1.65347e+06	256323	79023.5	4.9361e+06	117410	89007.6	81145.8	109082	95528.2	81508.1	347921	1.07169e+06
504.78758@1.007-QP	756823	2.54537e+06	1.75417e+06	525067	2.8063e+06	1.60082e+06	1.91701e+06	1.12343e+06	745900	6.60723e+06	5.88548e+06	501904	770096	838499	1.37975e+06	537438	524220	2.10861e+06	1.50084e+06	1.39747e+06	1.08164e+06	923445	1.31062e+06	1.21622e+06	421793	1.69242e+06	446242	766910	558689	1.86673e+06	1.86975e+06	406746	1.35429e+06	1.24546e+06	1.67319e+06	445635	452637	1.54658e+07	356865	2.57427e+06	574032	2.61393e+06	337381	368089	368164	688500	355503	2.53515e+06	836433
545.2632@12.177-QP	198368	133279	127567	73479.5	475787	52949	544245	502657	39951.4	303557	200704	144312	49014.3	91895.1	1.15627e+06	574183	43765.2	882734	48890.2	172720	47544	44079	45686.9	137224	138741	46549.8	106322	275651	110859	3.00014e+06	50735.1	2.31411e+06	842730	116863	415251	125157	57168	4.40755e+06	201693	242613	572642	82789.2	59531.7	55194.8	443610	643380	66324.7	475613	55965.7
549.15305@1.834-QP	3.80806e+06	1.96121e+06	2.69026e+06	2.70477e+06	3.27217e+06	1.36643e+06	2.4387e+06	3.34779e+06	284853	8.03332e+06	5.29718e+06	2.27219e+06	718265	1.3604e+06	1.38317e+06	1.0491e+06	1.76541e+06	1.99833e+06	1.47739e+06	2.34417e+06	3.26106e+06	1.50362e+06	1.27872e+06	3.09746e+06	1.95423e+06	1.31742e+06	3.24556e+06	905574	453155	1.52838e+06	3.76344e+06	4.73328e+06	730719	743686	692566	1.57738e+06	692025	7.51331e+06	762390	1.39132e+06	1.39745e+06	3.46807e+06	617995	1.4153e+06	1.19632e+06	2.13826e+06	451129	3.7989e+06	332756
588.29271@11.063-QP	70227.9	112450	66979.2	67805.9	69806.4	60169.9	62652.7	5.90979e+06	51697.5	60015.8	61310.2	1.83151e+07	61172.4	63492.3	9.45905e+06	64379.9	59639.4	61993.2	2.0332e+06	62368.8	61181.2	56149.1	59397.5	70872.6	60089.3	58305.5	708962	78951.7	61707.3	110287	61230.1	57083.2	74527.5	122815	1.0708e+06	116759	63676.5	74794	60360.3	65578.2	2.78863e+06	3.45337e+06	69115.9	62319.5	61990.3	75032.9	66876.5	2.16486e+07	202012
595.36805@12.572-QP	501178	53335.6	54467.3	77772.1	569374	166626	234954	2.05204e+06	474406	57331.7	50525.9	5.95e+06	74429.4	91467.4	1.05295e+06	1.80007e+06	104305	176842	3.53134e+06	278694	186821	528192	134603	288792	107538	52714.5	133758	135145	57448	1.64623e+06	276652	133596	105624	55161.2	304028	114752	1.22966e+06	1.06331e+06	195283	391942	106004	50469.8	943154	59510.2	66607.7	197962	181663	2.83804e+06	59864.1
714.36201@14.045-QP	231087	90066.2	100279	108896	1.89534e+07	116766	539049	171924	91911.3	121322	99126.8	101474	107936	1.82937e+06	106313	123984	108573	147937	109351	149789	108946	102473	119130	241476	127947	157007	210414	158026	124534	154752	105223	369703	162573	106744	752293	109300	113580	2.25785e+06	919116	111823	106812	114814	119623	109063	254738	690204	110422	664916	109182
801.44276@8.527-QP	34017	32635.8	31989.1	31161.9	30267.7	30399	29937.7	32676.5	28333.6	30208.7	32716.2	32347.3	37049.7	36889.2	31174	36013.5	32201.9	30218.6	28371.3	30213.3	27805.4	27353.2	31318.3	34002.8	29142	28002.1	32089.1	28911.3	117889	30829.4	32680.4	31454.6	59905.4	32720.3	32481.9	31604.6	36298.8	32588.6	31428.1	34605.5	35489.8	29305.3	32084.4	31586.1	29324.2	30826.6	37402.3	27144.4	31313.4
Phenylacetylene@1.826-QP	9.3167e+08	7.78775e+08	8.7462e+08	7.35944e+08	1355257436	6.80795e+08	9.09914e+08	1217419856	1.99166e+08	2224164568	1487184318	941485495	6.94322e+08	7.13951e+08	9.32223e+08	7.45396e+08	7.86246e+08	8.94141e+08	6.22823e+08	9.41777e+08	7.9772e+08	5.15846e+08	8.28321e+08	1048747314	8.17549e+08	557963825	1256757759	5.44886e+08	5.09951e+08	9.43027e+08	1271307178	1345520310	7.36454e+08	6.04307e+08	490772900	7.483e+08	7.83634e+08	2288215255	5.64701e+08	9.45498e+08	7.95633e+08	9.27464e+08	7.79665e+08	6.48852e+08	5.44533e+08	8.59374e+08	642977770	1392643839	4.96164e+08
Choline@0.993-QP	2.3493e+08	2.23722e+08	244209232	2.48602e+08	3.4012e+08	2.00357e+08	1.91289e+08	2.02003e+08	2.71391e+07	2.18189e+08	3.19596e+08	8.29532e+07	2.55332e+08	2.02421e+08	2.55547e+08	2.18247e+08	1.8434e+08	3.07157e+08	236074029	3.33462e+08	2.31838e+08	1.73227e+08	2.65296e+08	267114262	3.59566e+08	1.43314e+08	2.64418e+08	2.21784e+08	1.11606e+08	2.19689e+08	3.96095e+08	1.4586e+08	1.00143e+08	159189706	1.20685e+08	1.11235e+08	1.64941e+08	3.20566e+08	1.70484e+08	2.18963e+08	1.72247e+08	1.621e+08	1.90897e+08	1.27633e+08	1.45579e+08	1.4404e+08	121467469	2.41899e+08	1.11816e+08
103.98463@0.899-QP	5.08679e+08	4.72984e+08	4.91435e+08	4.55774e+08	4.6717e+08	436338847	503957646	5.21628e+08	3.91095e+08	4.28218e+08	4.71513e+08	4.51558e+08	4.15512e+08	4.24704e+08	4.79456e+08	4.72719e+08	4.47598e+08	4.7617e+08	4.47388e+08	4.29844e+08	4.12598e+08	4.07324e+08	4.49548e+08	4.62861e+08	4.25191e+08	4.20464e+08	483985998	4.80488e+08	4.44245e+08	450560855	4.61103e+08	4.26613e+08	4.15747e+08	4.36076e+08	4.46118e+08	4.15959e+08	4.4523e+08	4.07677e+08	4.6361e+08	4.37204e+08	4.24238e+08	4.19725e+08	4.10494e+08	4.42509e+08	4.13475e+08	4.24757e+08	4.02625e+08	4.56158e+08	4.11312e+08
104.02588@5.728-QP	1.80361e+06	3.68921e+06	8.84499e+06	2.97239e+07	2.90251e+07	1.18695e+07	1.80008e+07	4.52037e+07	791730	5.65456e+06	3.95406e+06	4.99773e+06	5.26535e+07	7.19067e+06	8.93831e+06	4.17706e+07	2.00967e+07	1.82477e+07	1.88085e+06	3.22818e+06	6.4199e+06	1.04128e+07	3.81643e+07	4.27524e+07	1.36729e+07	9.5639e+06	8.59762e+06	6.00391e+06	1.93367e+07	3.11394e+07	6.76906e+06	1.13022e+07	3.4927e+06	1.02851e+07	2.84027e+07	2.04731e+07	7.53631e+06	1.70544e+07	6.25049e+07	7.99365e+06	1.30613e+07	5.01752e+06	4.64673e+06	1.01692e+07	1.66949e+07	1.63702e+07	2.47901e+07	1.91151e+07	1.07124e+07
3-Hydroxybutyricacid@1.534-QP	5.92494e+07	1.06331e+08	9.03789e+07	8.07409e+07	2.27547e+08	4.45828e+07	140917823	1.62423e+08	8.45109e+07	7.06887e+07	5.58552e+07	1.71736e+07	3.09722e+07	3.7768e+07	1.41531e+08	7.76102e+07	4.81019e+07	5.1863e+07	6.79348e+07	5.49454e+07	6.29345e+07	7.26663e+07	5.25906e+07	1.32261e+08	5.94501e+07	4.70496e+07	49187019	2.74145e+07	1.10829e+08	1.80566e+08	6.91815e+07	1.61938e+08	1.91421e+08	7.74338e+07	5.29647e+07	1.1431e+08	1.80189e+08	5.84527e+07	1.549e+08	6.5325e+08	8.37946e+07	1.24188e+08	9.93232e+07	6.59358e+07	7.00876e+07	7.10355e+07	7.37168e+07	1.70368e+08	3.29137e+07
Glycericacid@1.039-QP	9.91631e+06	6.43122e+06	3.02912e+06	4.08578e+06	7.45532e+06	6.41517e+06	9.16732e+06	6.9965e+06	1.96939e+06	2.24206e+07	6.82589e+06	1.15249e+07	9.80068e+06	9.21194e+06	6.25446e+06	8.74745e+06	7.84894e+06	4.54596e+06	9.80802e+06	8.05531e+06	9.93984e+06	6.92385e+06	2.07596e+07	8.03374e+06	7.80626e+06	7.06699e+06	1.08254e+07	1.04936e+07	5.4039e+06	1.267e+07	7.79516e+06	5.15866e+06	5.0997e+06	5.76648e+06	1.29866e+07	9.2709e+06	6.74696e+06	1.29348e+07	6.85091e+06	6.268e+06	1.28592e+07	5.2768e+06	9.94227e+06	4.79555e+06	6.18706e+06	5.13408e+06	1.36576e+07	1.29576e+07	9.60551e+06
Benzaldehyde@1.825-QP	4.85664e+06	3.78052e+06	4.42211e+06	3.91798e+06	7.14668e+06	3.62314e+06	4.74186e+06	6.25375e+06	986477	1.15474e+07	7.54604e+06	5.20992e+06	3.64433e+06	3.88229e+06	4.33671e+06	4.32837e+06	4.24309e+06	4.54452e+06	3.25844e+06	4.79554e+06	3.88079e+06	2.5477e+06	4.68639e+06	6.12583e+06	4.26986e+06	2.58999e+06	6.1447e+06	2.67943e+06	2.47987e+06	4.96348e+06	6.66934e+06	6.73882e+06	3.61364e+06	3.20538e+06	2.42806e+06	3.68305e+06	3.79435e+06	1.1565e+07	3.30612e+06	4.82933e+06	3.91399e+06	5.31014e+06	4.09041e+06	3.12197e+06	2.48601e+06	4.09717e+06	3.08974e+06	7.10957e+06	2.593e+06
4-Methylphenol@6.798-QP	103072	9.92668e+06	4.62988e+06	1.18533e+07	81767.6	1.09967e+07	9.51807e+06	7.51348e+06	518879	97870.9	111448	4.15339e+06	2.21365e+07	4.88583e+07	762834	3.89372e+07	1.51025e+07	1.21695e+07	57925.3	6.95439e+06	1.59302e+06	1.6089e+06	3.4054e+07	2.59491e+06	9.45296e+06	7.89719e+06	1.4419e+07	3.11468e+07	1.74406e+06	3.54225e+07	9.22574e+06	116559	2.12747e+07	1.53292e+07	6.30469e+06	1.73668e+07	1.96702e+07	5.87032e+07	3.54125e+07	7.07152e+06	2.18529e+07	2.75249e+06	3.20234e+07	2.15629e+07	6.34623e+06	2.60407e+07	6.23016e+06	256427	2.53167e+07
5-Amino-1,2-oxazole-4-carbonitrile@9.902-QP	116756	172016	163565	94553.8	47372.7	101474	159395	131021	39880.2	71372.4	93834.3	165278	105116	103988	141981	95384.8	131249	94301	62066.6	83345.1	80799.6	65524.1	96148.5	76517.2	115103	73465.4	1.89027e+06	88881.3	145411	114456	95893.7	104521	746492	103608	61371.9	101272	102508	122845	96092.5	141768	95522.7	134601	108538	80398.9	76434.7	41123	81382	101389	62578.4
(2-Hydroxyphenyl)oxidanyl@9.903-QP	129666	325849	172508	107392	56133.6	118696	168111	138185	42060.7	34689	50844.5	174315	110863	117127	149744	100600	138425	99457.1	65460.2	87902.1	39260.2	69106.7	101406	80700.9	98226.7	77482.3	808369	105966	153362	120714	101137	110236	787308	130940	64727.5	106810	108113	25948	101347	149519	108635	141961	114472	84794.8	80613.8	43371.4	85831.7	106933	55548.2
2-aminophenol@4.753-QP	864822	343724	2.26822e+07	253907	109314	148494	3.3049e+07	151326	7.37947e+06	168270	1.1843e+07	161877	190496	4.1919e+07	161163	165133	41675.2	1.68535e+06	673242	3.28907e+06	135563	1.9792e+06	158146	183765	179237	175776	5.07237e+06	205139	141949	42657.2	2.79539e+07	1.56499e+07	182924	146929	4.78191e+07	162197	156010	199687	2.77841e+06	1.2759e+07	3.4276e+07	4.98623e+06	134043	181983	40404.3	42361.5	148841	157557	154002
2-aminophenol@3.265-QP	1.5512e+06	557855	3.9758e+07	131906	185123	241244	3.34555e+07	263489	1.37526e+07	1.17662e+06	3.10696e+07	246996	210733	6.57258e+07	150265	142191	260424	2.15438e+06	1.23531e+06	4.97692e+06	98060	1.97044e+06	167326	237146	103068	117583	1.07055e+07	192473	255253	108183	4.8294e+07	7.8006e+06	288761	192425	2.26696e+07	298180	268793	58519.6	3.45873e+06	3.62228e+07	1.48125e+07	4.9932e+06	177627	130767	94017.3	128084	317923	124890	119916
2-Furoicacid@1.34-QP	5.68648e+06	8.64639e+06	3.87476e+06	7.99803e+06	1.70208e+07	5.77169e+06	9.44352e+06	1.03357e+07	716351	5.48007e+06	3.42068e+06	1.02515e+07	4.29804e+06	9.52208e+06	1.41109e+07	1.32548e+07	1.72151e+07	7.2802e+06	1.26011e+07	1.43152e+07	7.1187e+06	1.09069e+07	6.68868e+06	1.04966e+07	1.16738e+07	7.00366e+06	1.12454e+07	1.40129e+07	1.0101e+07	3.14203e+07	1.31211e+07	6.57438e+06	1.49124e+07	8.90931e+06	1.59465e+07	1.20544e+07	2.96413e+07	1.25082e+07	2.64103e+07	6.78778e+06	7.36002e+06	4.74712e+06	1.68463e+07	1.12106e+07	9.55253e+06	6.70165e+06	1.19895e+07	8.06481e+06	1.07331e+07
112.02653@1.395-QP	137747	77573.6	90050.5	107419	4.03924e+06	406941	606364	571891	150895	1.35503e+06	501645	421356	203728	280107	336250	1.2928e+06	1.79793e+06	426621	104858	527749	98586.5	245644	188498	330829	282961	296658	292403	321282	260290	564732	250780	460289	2.25327e+06	290814	350979	385967	552110	724342	248762	429735	365847	530976	489876	299496	274601	400013	604244	501322	451411
Uracil@1.632-QP	1.23606e+07	1.87848e+07	2.69919e+07	8.38233e+06	2.10774e+07	1.91588e+07	3.49995e+07	2.36862e+07	3.01949e+06	1.70831e+07	1.31903e+07	1.26605e+07	1.75235e+07	2.27077e+07	2.38588e+07	1.93849e+07	8.65343e+06	2.26889e+07	2.25909e+07	1.50509e+07	1.86121e+07	1.2178e+07	1.86266e+07	2.81335e+07	1.57312e+07	1.27907e+07	9.30507e+06	1.86643e+07	1.60416e+07	1.36503e+07	1.17759e+07	1.34236e+07	1.61672e+07	16115399	1.30405e+07	1.8355e+07	2.11829e+07	1.20265e+07	1.63218e+07	3.5583e+07	1.01869e+07	2.12863e+07	2.93853e+07	2.3202e+07	7.12956e+06	1.91159e+07	1.26832e+07	1.42827e+07	1.4038e+07
113.02193@2.667-QP	29981.7	26222.1	27156.4	27736.9	33254.5	25062.5	25673.7	26058.2	19576.9	27602.4	26061.5	20372.7	44203.4	25645	30235	24750	25010.5	25766.2	23036.6	25945.6	22880.5	22015	26495.2	23109.7	23672.3	27250.8	26376	25587.7	24249.2	27940.1	25790.9	25565.6	27577.2	36634	23990.4	27520.5	29915.8	27724.8	31574.8	37986.5	28567.5	24688.3	30527.9	27346.8	25194.8	27489.6	36375.1	28148.3	23974.5
113.02934@13.289-QP	80726.1	78642.8	79419.7	82564.7	82641.7	81499.3	86749.8	87570.8	70608.7	85461.9	85582.4	94552.5	72486.7	101504	79644.3	80538.8	70489.1	78866.6	81296.7	76988.1	71230	70734.9	77222.4	74387.1	74001.8	68306.3	78575.6	75398.2	71014.2	71063.2	79102.5	70261.3	72737.1	73685	70301.3	72016.2	67556.6	80304.3	72482.3	70177.4	67976.1	63826.2	76865.4	69048.7	71301.3	73176.1	75906.6	73508.8	72359.9
Creatinine@1.186-QP	1.767e+07	3.58044e+07	5.3413e+07	5.62274e+07	2.94725e+07	2.75056e+07	5.9639e+07	3.2595e+07	1.84716e+07	1.8447e+08	3.15513e+07	5.07496e+07	5.90681e+07	5.27918e+07	7.31071e+07	7.16143e+07	5.91631e+07	2.41837e+07	7.10722e+07	7.65152e+07	5.37728e+07	4.59032e+07	6.38774e+07	3.72241e+07	3.55719e+07	5.17355e+07	6.85353e+07	1.00148e+08	3.69364e+07	5.79496e+07	5.43131e+07	3.98538e+07	5.48633e+07	6.31896e+07	2.65207e+07	1.31268e+08	9.72206e+07	8.47732e+07	4.15886e+07	6.87727e+07	5.46434e+07	6.09457e+07	1.48421e+08	6.84915e+07	5.63369e+07	5.38702e+07	4.59432e+07	1.29004e+08	9.01199e+07
e-Caprolactam@4.825-QP	4.28632e+06	1.95352e+06	1.3444e+06	1.8194e+06	2.21479e+06	1.98202e+06	1.04919e+06	2.48009e+06	930136	2.61628e+06	2.405e+06	1.06164e+06	1.43808e+06	974187	1.64871e+06	2.03103e+06	1.42327e+06	4.74213e+06	1.68835e+06	2.40975e+06	2.70333e+06	1.94557e+06	2.42501e+06	3.38803e+06	4.79002e+06	1.10761e+06	1.21374e+06	2.54969e+06	1.59067e+06	2.85105e+06	922568	1.69516e+06	2.15858e+06	2.37969e+06	960373	1.44318e+06	1.55903e+06	1.98864e+06	1.64954e+06	2.51401e+06	2.0004e+06	2.1947e+06	1.88889e+06	2.12067e+06	2.08144e+06	1.78152e+06	2.6842e+06	3.71396e+06	1.79149e+06
e-Caprolactam@5.429-QP	7.62544e+06	639408	1.37724e+06	1.39681e+06	1.09824e+07	1.08738e+06	379443	3.95112e+06	49059.6	5.52763e+06	3.7524e+06	7.45441e+06	1.04176e+06	5.52306e+06	863767	8.1756e+06	1.05045e+06	925667	2.23794e+06	2.90141e+06	1.70139e+06	1.05225e+06	1.29272e+06	611215	942559	416019	1.04887e+06	3.17566e+06	1.1428e+06	348711	894905	943561	2.09824e+07	9.44674e+06	2.45703e+06	1.61648e+06	2.70276e+06	1.83225e+06	2.69367e+06	1.08666e+07	6.68931e+06	935940	1.95089e+06	5.1145e+06	3.82772e+06	513145	1.74782e+06	3.08692e+06	2.15882e+06
Trifluoroaceticacid@4.668-QP	1.55109e+06	115221	94479.9	108547	2.37837e+06	1.9037e+06	5.53308e+06	6.50909e+06	104253	155536	44926.1	102355	106163	72618.1	763122	496079	104486	90510.9	1.75389e+06	221617	87666.7	589089	34151.9	33428.6	187628	171709	390102	2.65435e+06	593184	1.20832e+07	1.26883e+06	103382	190046	127501	471041	76337.5	135392	87323.5	120889	417506	315714	74039.4	74554.8	135345	88875.4	111700	113618	140187	187251
114.02896@1.041-QP	1.21717e+06	3.67394e+06	810387	1.12991e+06	3.289e+06	891975	1.3716e+06	3.30273e+06	467270	2.20086e+06	1.47599e+06	667837	1.75562e+06	1.81895e+06	2.01409e+06	1.90165e+06	490383	934282	1.02187e+06	874736	860365	960550	925696	2.49609e+06	1.82157e+06	487596	862195	1.06289e+06	1.73614e+06	6.51314e+06	1.84082e+06	608799	1.31657e+06	502463	1.58916e+06	2.86345e+06	2.3014e+06	8.73326e+06	1.99695e+06	2.22318e+06	737165	857784	652742	673759	1.5193e+06	824398	2.21726e+06	1.07782e+06	842665
2,4(1H,3H)-Pyrimidinedione-2-14C@10.143-QP	109936	113994	72860.5	149966	177673	132186	203802	194983	50821.1	188977	160594	147641	138011	135050	182354	188405	130663	118604	35323.7	141572	132293	79464.8	146642	126259	85647.1	74318.9	70343.5	88462.8	116425	258814	111426	152837	216566	98187.3	104345	76929	140539	161468	107377	218879	218245	151010	113495	82220.9	106967	175918	170153	47344.4	133485
Glutaricanhydride@3.262-QP	441690	442983	2.19063e+07	272227	429917	279806	2.19173e+07	286363	6.32636e+06	222459	1.78452e+07	473608	36797.3	4.51081e+07	630908	273995	162404	818735	269185	2.07229e+06	216152	542692	232697	367764	191680	232908	5.01057e+06	236005	231726	240514	3.24123e+07	3.21614e+06	230713	243439	1.18535e+07	244658	262558	518098	1.28914e+06	2.50539e+07	8.07874e+06	2.15322e+06	47494.7	33957.9	261999	220820	282017	475938	305596
2-hydroxy-2,4-pentadienoate@0.985-QP	9.00034e+06	9.80431e+06	1.35478e+07	6.62909e+06	2.30499e+07	7.45239e+06	1.18761e+07	1.55729e+07	1.69117e+06	7.35785e+06	1.47803e+07	1.20161e+07	9.87541e+06	1.03607e+07	1.30135e+07	7.61439e+06	3.29905e+06	8.75014e+06	4.18709e+06	7.72199e+06	4.35642e+06	3.36576e+06	8.79136e+06	1.49798e+07	6.09978e+06	4.76034e+06	8.1798e+06	7.00403e+06	7.11256e+06	1.17173e+07	1.00556e+07	1.01954e+07	1.0968e+07	7.34999e+06	4.86256e+06	8.36392e+06	1.10126e+07	1.36732e+07	7.54016e+06	1.12619e+07	7.29293e+06	9.06893e+06	1.36662e+07	6.99812e+06	7.56216e+06	7.65071e+06	8.13594e+06	1.23981e+07	5.60597e+06
Beta-cyanoalanine@1.975-QP	128164	240072	115355	101573	258603	287455	114071	174465	44163.1	196845	104741	230067	272094	189316	241515	290501	170444	91578.2	169423	191419	71601.1	59296.7	175446	215598	142261	73495.3	234941	83852.2	138029	176994	170270	91039	2.11933e+07	269152	399474	149517	212967	158280	275747	257936	204276	133271	389387	135548	141563	199711	238263	189618	213618
1H-Inden-1-ylidene@2.955-QP	5.39573e+07	6.12474e+07	6.29346e+07	7.26317e+07	6.60731e+07	7.07024e+07	6.96343e+07	4.45399e+07	5.04036e+06	6.4372e+07	4.35235e+07	4.96056e+07	7.88891e+07	6.14139e+07	9.64666e+07	5.95127e+07	7.14512e+07	9.22523e+07	4.49779e+07	8.92585e+07	4.45908e+07	2.88707e+07	6.96536e+07	6.91867e+07	7.28947e+07	7.57302e+07	8.86157e+07	7.00028e+07	4.16803e+07	3.52724e+07	6.89652e+07	2.64592e+07	4.30757e+07	6.13188e+07	5.4526e+07	5.56651e+07	8.05494e+07	5.2222e+07	5.55052e+07	4.26017e+07	5.39927e+07	4.27634e+07	9.13323e+07	6.5131e+07	5.83903e+07	7.57492e+07	7.19564e+07	5.35503e+07	4.5838e+07
D-(+)-Proline@1.043-QP	2.25101e+08	1.33848e+08	1.2778e+08	3.03934e+08	2.02226e+08	2.28054e+08	1.805e+08	1.55525e+08	2.60741e+07	1.87914e+08	3.02853e+08	1.82149e+08	2.52235e+08	1.38148e+08	1.91261e+08	1.44825e+08	3.26843e+08	1.42733e+08	8.92452e+07	208460856	9.9397e+07	9.56969e+07	2.75448e+08	2.24615e+08	1.39895e+08	3.19266e+08	3.19532e+08	2.13228e+08	7.34464e+07	1.05018e+08	1.8639e+08	1.82884e+08	1.06687e+08	1.67205e+08	1.22785e+08	1.40487e+08	1.05489e+08	1.72028e+08	1.85639e+08	1.26604e+08	1.41215e+08	9.25769e+07	1.41012e+08	1.2123e+08	1.4072e+08	2.07168e+08	158926400	1.13304e+08	2.12927e+08
Proline@0.862-QP	1.06195e+07	1.23565e+07	8.49629e+06	2.13133e+07	1.28037e+07	1.54844e+07	7.93463e+06	1.36631e+07	8.66049e+06	1.83087e+07	1.00218e+07	9.36333e+06	1.0367e+07	1.0419e+07	1.15496e+07	1.05474e+07	1.49894e+07	1.48298e+07	1.42122e+07	1.81044e+07	1.17131e+07	9.87119e+06	1.31453e+07	1.15451e+07	7.38544e+06	1.2771e+07	1.13547e+07	8.30006e+06	9.45426e+06	8.18369e+06	1.08382e+07	1.34472e+07	1.20957e+07	1.01304e+07	9.44349e+06	1.15834e+07	1.45323e+07	1.41819e+07	1.29648e+07	6.40511e+06	1.40109e+07	1.09002e+07	8.9469e+06	8.21893e+06	9.17467e+06	1.12503e+07	7.97476e+06	4.76393e+06	8.3708e+06
thienylphosphine@0.969-QP	2.24943e+07	1.66956e+07	1.50156e+07	1.34501e+07	2.30892e+07	1.50554e+07	2.17893e+07	1.93206e+07	1.06699e+07	2.23579e+07	1.53812e+07	2.2308e+07	2.1454e+07	1.94654e+07	1.92379e+07	1.72743e+07	1.67266e+07	1.3696e+07	1.20292e+07	1.74123e+07	8.07676e+06	9.38547e+06	1.6457e+07	2.03229e+07	1.30916e+07	1.46589e+07	2.74034e+07	1.94643e+07	1.16269e+07	1.75087e+07	1.92494e+07	1.37581e+07	9.42554e+06	1.38966e+07	1.22616e+07	1.56751e+07	2.06884e+07	2.34823e+07	1.63873e+07	2.36951e+07	1.78383e+07	9.30306e+06	2.03746e+07	1.3112e+07	1.8074e+07	1.55337e+07	1.71865e+07	1.4275e+07	1.78247e+07
guanidinoacetate@1.67-QP	4.29207e+07	5.65802e+07	4.96625e+07	3.60792e+07	8.21412e+07	5.58062e+07	54896949	7.02665e+07	9.74699e+06	3.98822e+07	4.47664e+07	1.35113e+07	3.65996e+07	5.11131e+07	7.58968e+07	5.49364e+07	3.30546e+07	3.85413e+07	3.25582e+07	4.90286e+07	2.94804e+07	2.05051e+07	3.45168e+07	2.07708e+07	4.11575e+07	4.0318e+07	6.00513e+07	2.21831e+07	2.62954e+07	5.234e+07	2.51106e+07	5.05951e+07	4.76031e+07	4.1396e+07	8.29312e+06	5.77206e+07	7.36135e+07	5.52419e+07	5.33631e+07	1.37701e+08	4.99067e+07	4.42775e+07	5.65147e+07	5.09468e+07	4.33681e+07	4.26831e+07	1.2547e+07	1.22225e+08	2.63381e+07
116.04972@2.964-QP	1.95486e+07	2.23259e+07	2.18011e+07	2.70175e+07	2.41031e+07	2.53884e+07	2.59215e+07	1.71233e+07	1.77532e+06	2.45934e+07	1.73725e+07	1.91315e+07	3.24466e+07	2.43255e+07	3.7138e+07	2.30229e+07	2.85578e+07	3.70874e+07	1.78374e+07	3.45037e+07	1.74577e+07	1.15293e+07	2.83328e+07	2.83524e+07	2.98233e+07	2.97417e+07	3.56295e+07	2.76241e+07	1.70292e+07	1.37672e+07	2.74199e+07	1.00947e+07	1.72837e+07	2.51515e+07	2.14839e+07	2.17303e+07	2.94328e+07	2.09923e+07	2.11407e+07	1.75638e+07	2.13198e+07	1.75688e+07	3.5429e+07	2.57706e+07	2.26746e+07	2.95468e+07	2.90336e+07	2.23115e+07	1.80955e+07
Cyclohexanethiol@1.044-QP	1.15002e+07	6.68123e+06	5.70168e+06	1.6208e+07	1.21393e+07	1.01006e+07	8.91593e+06	6.1476e+06	1.68244e+06	1.01317e+07	1.56618e+07	1.04079e+07	1.24304e+07	6.57884e+06	8.15639e+06	7.03535e+06	1.81084e+07	8.46332e+06	4.56251e+06	1.22476e+07	5.29992e+06	4.19168e+06	1.07019e+07	9.76891e+06	7.11605e+06	1.39483e+07	2.18691e+07	1.05745e+07	3.6749e+06	5.58648e+06	1.16544e+07	9.87211e+06	6.03674e+06	9.23373e+06	7.43902e+06	7.14097e+06	5.3687e+06	9.0023e+06	1.01106e+07	6.56269e+06	8.40324e+06	5.71856e+06	7.58961e+06	6.00036e+06	7.66706e+06	1.04724e+07	8.09049e+06	5.66876e+06	1.17952e+07
2-amino-3-oxobutanoicacid@1.323-QP	1.83743e+06	1.16968e+07	8.74607e+06	2.82983e+06	5.3171e+06	4.80468e+06	1.03391e+07	5.77636e+06	5.41354e+06	4.39405e+06	2.03823e+06	4.10749e+06	2.62864e+06	4.99778e+06	2.10567e+06	1.07046e+07	5.89936e+06	3.84747e+06	6.91933e+06	2.47855e+06	1.29503e+07	2.20914e+06	3.96832e+06	5.37596e+06	4.95039e+06	1.82667e+06	2.0617e+06	3.09009e+06	3.9246e+06	1.03489e+07	2.61502e+06	2.81543e+06	6.79491e+06	3.18064e+06	1.94396e+06	5.68126e+06	6.33645e+06	5123026	7.90952e+06	9.08651e+06	2.99209e+06	3.38696e+06	6.91899e+06	4.63495e+06	2.26397e+06	3.98516e+06	2.44901e+06	3.24733e+06	6.20872e+06
Indole@2.955-QP	2.61336e+08	2.93661e+08	2.85773e+08	3.54564e+08	3.20778e+08	3.45304e+08	3.40421e+08	2.20046e+08	2.43538e+07	3.2008e+08	2.20663e+08	2.43199e+08	4.00949e+08	3.10313e+08	4.81887e+08	3.00758e+08	3.66211e+08	471916637	2.2594e+08	4.40338e+08	220716200	1.43961e+08	3.57176e+08	3.54032e+08	3.7229e+08	3.8321e+08	4.49479e+08	3.52675e+08	2.18428e+08	1.77439e+08	3.44893e+08	1.3052e+08	2.19847e+08	3.19576e+08	2.75062e+08	279334136	4.00018e+08	2.57874e+08	2.72139e+08	221178800	2.75179e+08	2.22276e+08	4.63727e+08	333432066	2.92706e+08	375180106	3.6928e+08	2.72473e+08	2.32599e+08
Phenylacetonitrile@1.826-QP	1.47413e+07	1.50127e+07	1.6979e+07	1.45776e+07	2.58592e+07	1.26776e+07	1.52005e+07	2.0895e+07	3.06797e+06	4.07973e+07	2.27739e+07	1.87702e+07	1.11843e+07	1.14786e+07	1.72077e+07	1.43097e+07	1.47366e+07	1.75328e+07	1.20046e+07	1.71136e+07	1.55644e+07	9.48674e+06	1.69719e+07	1.90346e+07	1.50677e+07	9.84356e+06	2.33427e+07	8.55048e+06	9.54047e+06	1.76071e+07	2.53513e+07	2.17013e+07	1.12843e+07	9.83772e+06	9.58554e+06	1.45962e+07	1.22405e+07	3.71162e+07	1.22261e+07	1.95885e+07	1.53066e+07	1.52246e+07	1.43982e+07	1.20573e+07	9.28329e+06	1.57194e+07	1.27535e+07	2.49637e+07	1.00463e+07
Phenylacetonitrile@9.314-QP	526448	703151	1.96929e+06	643225	712329	728080	863420	1.68741e+06	84652.3	1.15246e+06	1.81432e+06	1.54356e+07	1.61708e+06	1.54563e+06	869193	935010	1.51254e+06	1.45207e+06	1.22899e+06	1.25065e+06	290598	499946	1.43305e+06	976525	1.01693e+06	432404	584832	1.14336e+06	553903	765890	726539	935544	3.51059e+06	796161	1.64429e+06	1.73386e+06	629260	648722	559256	253265	609240	525403	1.1031e+06	799194	750508	846071	2.69424e+06	661866	3.47607e+06
Betaine@1.367-QP	1.12691e+08	8.32551e+07	4.72682e+07	5.08293e+07	1.34772e+08	4.45512e+07	5.09761e+07	6.55345e+07	1.43675e+07	1.52977e+08	4.68162e+07	1.46953e+08	1.26606e+08	8.84856e+07	9.35279e+07	9.01529e+07	1.0023e+08	8.41808e+07	5.69706e+07	13901474	7.00145e+07	5.95892e+07	6.14138e+07	8.06729e+07	4.84862e+07	4.29117e+07	1.81539e+08	7.79445e+07	7.33633e+07	6.31482e+07	8.87998e+07	9.57293e+07	115526116	9.3907e+07	1.13683e+08	1.08453e+08	8.30382e+07	8.35335e+07	1.31923e+08	1.502e+08	1.01218e+08	8.40481e+07	9.88956e+07	9.95339e+07	5.8608e+07	1.05563e+08	8.05271e+07	8.51176e+07	3.99871e+07
Betaine@1.06-QP	4.52384e+08	4.75554e+08	5.24376e+08	6.22495e+08	5.76791e+08	5.14599e+08	2.83496e+08	3.4995e+08	9.74721e+07	3.15145e+08	6.45949e+08	5.67748e+08	4.34112e+08	3.14526e+08	423890535	4.12196e+08	4.75734e+08	2.84192e+08	2.82611e+08	568761448	2.57849e+08	300729823	3.55443e+08	3.52908e+08	2.59682e+08	3.86973e+08	4.98201e+08	3.95535e+08	2.90772e+08	3.16695e+08	2.84809e+08	4.68767e+08	564240273	3.58989e+08	7.33639e+08	4.5897e+08	2.97793e+08	4.60937e+08	5.88804e+08	6.75027e+08	3.53475e+08	3.09577e+08	3.75236e+08	3.4357e+08	3.15485e+08	358801395	4.38916e+08	3.21262e+08	2.18361e+08
Betaine@1.292-QP	1.2227e+08	9.79673e+07	5.61491e+07	6.20538e+07	1.52855e+08	8.46963e+07	5.6599e+07	6.91384e+07	1.4983e+07	1.37251e+08	7.97192e+07	1.61972e+08	1.26412e+08	9.74436e+07	1.20013e+08	9.93648e+07	1.45136e+08	8.97163e+07	8.12111e+07	6.37612e+07	7.70032e+07	6.52205e+07	9.352e+07	9.20174e+07	6.80976e+07	4.51572e+07	1.91586e+08	1.06047e+08	7.70365e+07	7.0953e+07	9.74553e+07	1.14579e+08	1.36532e+08	1.14394e+08	1.53479e+08	1.15226e+08	8.27871e+07	8.69441e+07	1.46687e+08	1.77394e+08	116967896	9.69026e+07	1.25263e+08	1.03894e+08	6.79091e+07	1.13251e+08	1.13035e+08	9.21266e+07	4.40348e+07
1-Chloro-1,2,2-trifluoroethane@0.922-QP	1.48642e+08	1.58868e+08	1.69009e+08	1.50674e+08	1.55433e+08	1.67338e+08	1.8672e+08	1.80247e+08	3.50462e+07	1.31471e+08	1.43228e+08	1.50436e+08	1.496e+08	169330173	1.4595e+08	1.719e+08	1.42365e+08	1.61661e+08	1.38531e+08	1.57241e+08	1.45374e+08	1.32096e+08	1.54902e+08	1.52995e+08	1.603e+08	1.39097e+08	1.72237e+08	152746633	169315528	1.59454e+08	1.56961e+08	1.58208e+08	1.71423e+08	1.49841e+08	1.64558e+08	1.6691e+08	1.69053e+08	142295261	167511267	1.79415e+08	1.52107e+08	1.6688e+08	170203979	1.47241e+08	1.49384e+08	1.50862e+08	1.61672e+08	1.60961e+08	1.47388e+08
Methylmalonicacid@1.498-QP	2.79686e+07	3.5273e+07	2.37917e+07	3.00648e+07	3.88724e+07	2.7656e+07	3.83727e+07	2.82717e+07	1.41895e+07	7.24481e+07	4.47799e+07	4.03143e+07	3.20811e+07	2.55005e+07	3.21271e+07	3.76796e+07	2.5915e+07	3.74062e+07	3.33143e+07	3.72254e+07	3.09861e+07	3.05577e+07	2.80384e+07	4.8406e+07	3.19043e+07	2.58843e+07	3.81215e+07	3.64685e+07	3.90097e+07	3.77198e+07	3.67892e+07	3.22935e+07	2.91561e+07	3.38428e+07	5.22594e+07	4.71005e+07	4.32705e+07	6.93408e+07	3.51981e+07	3.92787e+07	3.2914e+07	3.59738e+07	3.8819e+07	3.2091e+07	2.80178e+07	3.26625e+07	4.43028e+07	4.41053e+07	2.97169e+07
2,4,6-Octatriyn-1-ol@1.411-QP	2.97496e+08	2.48393e+08	2.28967e+08	2.44217e+08	3.54006e+08	2.42831e+08	1.70877e+08	2.83483e+08	4.32216e+07	2.81562e+08	2.13145e+08	1.99185e+08	1.91687e+08	1.68897e+08	393964097	2.25056e+08	2.95216e+08	3.08286e+08	1.78604e+08	3.01017e+08	1.24752e+08	1.29791e+08	2.44338e+08	2.94432e+08	1.66158e+08	2.9884e+08	371118070	2.30013e+08	1.47975e+08	2.00922e+08	2.99994e+08	2.64222e+08	1.41201e+08	1.76084e+08	2.51787e+08	2.85944e+08	2.2895e+08	2.11816e+08	1.85174e+08	1.63421e+08	2.01482e+08	1.93533e+08	1.99501e+08	217919796	2.08381e+08	1.99554e+08	2.96675e+08	1.74365e+08	1.3612e+08
Benzimidazole@11.752-QP	33658.1	40764.8	41623.6	39232.7	40115	38200.8	49432.7	40030.2	30668.6	37508.1	39402.3	35733.7	35218.2	40474.3	38276.3	42756.3	38519.9	80856	34533.6	33959.2	34731.1	33413.3	35592.8	38572.7	33814.8	33172.7	37990.3	37207.4	34553.2	39700.1	37417.4	33459.8	502930	33297.8	36639.7	1.01046e+07	34776.6	40150.1	36113.3	36341.7	34446.8	36171.4	39200.7	33722.3	35514.4	35094.2	42345.6	36704.8	36397.8
118.06062@2.954-QP	1.18365e+07	1.30884e+07	1.33006e+07	1.6391e+07	1.49581e+07	1.61796e+07	1.61223e+07	1.035e+07	1.01645e+06	1.52454e+07	1.14194e+07	1.15592e+07	1.96858e+07	1.44381e+07	2.29945e+07	1.3995e+07	1.82446e+07	2.22661e+07	1.10727e+07	2.11747e+07	1.0693e+07	6.91063e+06	1.73348e+07	1.72415e+07	1.71866e+07	1.81326e+07	2.1363e+07	1.72571e+07	9.94439e+06	8.47968e+06	1.67021e+07	6.07508e+06	9.6813e+06	1.48027e+07	1.2876e+07	13115310	1.89859e+07	1.26705e+07	1.28492e+07	1.04075e+07	1.31278e+07	1.03782e+07	2.16145e+07	1.57869e+07	1.403e+07	1.77014e+07	1.7431e+07	1.24024e+07	1.03488e+07
2-Hydroxyvalericacid@2.669-QP	4.9917e+06	4.82079e+06	1.85995e+07	6.95841e+06	1.31741e+07	8.54562e+06	9.81114e+06	6.35043e+06	2.25907e+06	1.17238e+07	9.46742e+06	5.12487e+07	4.84574e+06	1.02926e+07	1.03795e+07	1.15028e+07	7.90952e+06	4.80001e+06	1.97003e+06	1.21451e+07	4.68345e+06	2.25766e+06	6.5248e+06	6.35836e+06	4.47597e+06	3.19661e+06	1.19801e+07	1.26882e+07	5.57915e+06	8.80572e+06	7.96423e+06	6.55571e+06	9.2159e+06	3.48285e+06	2.40013e+07	6.72194e+06	6.55909e+06	7.58262e+06	1.35093e+07	9.85159e+07	1.28899e+07	6.37188e+06	4.09145e+06	3.51891e+06	1.57392e+06	9.06105e+06	1.73182e+06	1.63884e+07	4.872e+06
2-Hydroxyvalericacid@2.39-QP	4.47668e+07	4.37804e+07	164248730	9.19157e+07	146399510	6.84654e+07	8.48619e+07	4.94902e+07	1.65864e+07	9.9459e+07	8.71761e+07	4.24806e+08	4.67245e+07	103487735	8.63986e+07	1.21353e+08	8.11713e+07	3.87139e+07	4.34747e+07	8.66517e+07	4.18165e+07	20916170	8.25294e+07	6.3282e+07	4.05797e+07	2.99619e+07	9.18488e+07	9.94371e+07	4.2471e+07	5.27357e+07	6.47522e+07	6.63211e+07	8.82677e+07	5.11678e+07	2.51213e+08	8.78099e+07	8.30405e+07	8.48479e+07	9.88531e+07	6.89543e+08	1.19669e+08	1.11579e+08	1.92531e+08	8.17629e+07	4.29196e+07	6.23162e+07	8.11209e+07	2.00654e+08	3.58144e+07
2-hydroxy-2-methylbutyricacid@1.97-QP	6.93723e+06	5.85077e+06	2.38552e+07	1.03731e+07	1.8669e+07	1.17548e+07	1.42507e+07	9.26457e+06	2.84515e+06	2.33735e+07	1.76404e+07	8.19132e+06	1.78586e+07	10050941	1.27992e+07	1.25637e+07	9.29812e+06	1.01474e+07	6.09288e+06	1.05716e+07	9.33941e+06	4.06603e+06	6.31207e+06	4.54178e+06	4.91506e+06	1.00357e+07	1.16003e+07	4.57071e+06	7.36234e+06	5.07484e+06	1.02601e+07	5.10285e+06	7.49478e+06	8.99624e+06	6.62168e+06	8.53642e+06	1.06004e+07	8.21064e+06	6.10201e+06	3.30391e+07	1.11932e+07	4.15759e+07	1.4174e+07	6.20317e+06	4.35889e+06	5.29484e+06	9.94579e+06	2.4179e+07	6.2386e+06
Hexanethiol@1.063-QP	2.00093e+07	1.77624e+07	2.42671e+07	2.71902e+07	2.3543e+07	1.85056e+07	1.07775e+07	1.3004e+07	3.56417e+06	1.21397e+07	2.6052e+07	2.76171e+07	2.2366e+07	1.07517e+07	1.66463e+07	1.86834e+07	2.02891e+07	1.20611e+07	1.14463e+07	1.99589e+07	1.07747e+07	1.31357e+07	1.51097e+07	1.51059e+07	1.13377e+07	1.80421e+07	2.27611e+07	1.69826e+07	1.32187e+07	1.4486e+07	1.14478e+07	2.07602e+07	2.26982e+07	1.56436e+07	3.16812e+07	1.98054e+07	1.22054e+07	1.64859e+07	2.43496e+07	2.69085e+07	1.56792e+07	1.27448e+07	1.54977e+07	1.38479e+07	1.23095e+07	1.86746e+07	1.73933e+07	1.32516e+07	9.07934e+06
2-methylserine@1.01-QP	1.03735e+07	7.55147e+06	5.42742e+06	1.35373e+07	1.54093e+07	1.57054e+07	8.07414e+06	1.48222e+07	4.42111e+06	1.82117e+07	1.09642e+07	1.19518e+07	1.8312e+07	9.17556e+06	9.51284e+06	8.67923e+06	1.47257e+07	1.53932e+07	9.97096e+06	1.7086e+07	1.12984e+07	8.54437e+06	1.47349e+07	1.59932e+07	1.09247e+07	1.87537e+07	1.39131e+07	1.7629e+07	9.01136e+06	1.22436e+07	2.0163e+07	1.34161e+07	6.46166e+06	1.34689e+07	9.8968e+06	1.36474e+07	1.16321e+07	1.88359e+07	2.08033e+07	8.41972e+06	1.14414e+07	7.67558e+06	1.22591e+07	1.10682e+07	1.52324e+07	1.68251e+07	1.21746e+07	5.55798e+06	1.3716e+07
2-Methyl-5-vinylpyridine@1.856-QP	9.06295e+08	7.55045e+08	8.47983e+08	7.12786e+08	1313376711	6.617e+08	881627474	1176689128	1.93493e+08	2164706789	1445508241	9.14623e+08	6.70384e+08	6.93619e+08	9.01984e+08	7.2021e+08	7.61889e+08	862464944	6.02137e+08	9.15102e+08	7.76274e+08	5.00245e+08	8.0531e+08	1017725699	7.91515e+08	5.42462e+08	1212825565	5.29867e+08	4.9353e+08	9.11902e+08	1229667957	1306470854	7.12524e+08	5.86766e+08	4.74493e+08	7.23764e+08	7.63039e+08	2225591792	5.45682e+08	9.17291e+08	7.72435e+08	9.01009e+08	7.5882e+08	6.28373e+08	5.28797e+08	8.29795e+08	6.24399e+08	1349305881	4.82558e+08
3-Methyl-4-vinylpyridine@7.911-QP	1.41665e+07	3.74282e+07	7.00084e+07	2.71454e+07	1.0226e+08	2.09072e+07	8.45048e+07	6.64621e+07	1.27897e+07	2.52757e+07	1.43019e+08	2.01659e+07	1.26444e+07	5.1561e+07	4.45539e+07	7.03231e+06	2.08472e+07	4.01687e+07	2.44737e+07	2.77031e+07	1.62292e+07	2.58244e+07	4.24415e+07	3.93513e+07	2.75259e+07	7.87601e+06	5.81747e+07	2.0298e+07	1.74222e+07	2.35607e+07	2.89553e+07	2.87081e+07	9.873e+07	1.86831e+07	2.87131e+07	2.30459e+07	2.3215e+07	5.79953e+07	1.69513e+07	7.37181e+07	3.43655e+07	8.26226e+07	2.07493e+07	1.87834e+07	1.16159e+07	4.36498e+07	1.12174e+07	2.44659e+06	2.77427e+07
Indoline@7.335-QP	923637	2.34686e+06	6.11824e+06	4.00617e+06	7.56277e+06	2.57916e+06	5.28947e+06	2.125e+06	228458	1.00581e+06	1.24475e+07	1.52945e+06	441969	3.42089e+06	3.72657e+06	1.35934e+06	2.05136e+06	891915	623368	768546	430601	430613	1.98728e+06	497278	848368	663242	2.93914e+06	1.23716e+06	351000	336310	736901	1.02173e+06	1.49834e+06	1.03046e+06	1.5841e+06	830484	2.81973e+06	925307	679740	3.01642e+06	1.61469e+06	4.85523e+06	2.21067e+06	1.01609e+06	245901	2.89338e+06	634290	246617	1.59438e+06
119.9585@0.903-QP	1.10417e+07	1.00346e+07	1.12758e+07	9.75116e+06	9.93861e+06	1.10838e+07	1.41827e+07	1.20949e+07	1.34208e+07	1.24492e+07	1.21675e+07	1.26261e+07	1.11353e+07	9.54097e+06	1.14708e+07	1.055e+07	9.7867e+06	1.1304e+07	1.09563e+07	1.05234e+07	1.08067e+07	1.08346e+07	1.11554e+07	1.0385e+07	1.01825e+07	1.24327e+07	1.16359e+07	9.31298e+06	1.10628e+07	9.03129e+06	1.0351e+07	9.43627e+06	1.13657e+07	1.01253e+07	9.67686e+06	1.1213e+07	1.05738e+07	8.62833e+06	1.03952e+07	1.12301e+07	9.43946e+06	1.34434e+07	1.26459e+07	9.63022e+06	9.09146e+06	9.11169e+06	9.59651e+06	9.41213e+06	8.41223e+06
6-(Oxomethylene)-2,4-cyclohexadien-1-one@4.772-QP	947096	531369	838712	982861	705575	743542	889834	849392	704759	535456	1.14906e+06	3.00792e+07	349375	899936	289983	4.61923e+06	811015	590270	670843	602732	163013	167453	757398	636440	654739	616775	547955	650876	638524	426227	862506	632683	753528	705778	747618	624410	701824	842001	655877	683483	662638	534177	532427	739003	674629	654345	1.22193e+07	536061	265136
6-(Oxomethylene)-2,4-cyclohexadien-1-one@7.495-QP	294963	597007	301677	306833	84385.9	369749	308188	273636	301844	399281	411932	7.12651e+07	209304	127171	325047	2.68158e+06	280178	446956	316543	271888	384113	148717	274079	322354	252974	216702	232928	171873	327019	425307	94731.3	26653.7	228777	288099	364759	283341	237299	272165	270600	149507	265481	207342	245156	325974	395187	352812	2.54708e+07	424276	297620
6-(Oxomethylene)-2,4-cyclohexadien-1-one@4.043-QP	566868	1.94392e+06	920181	622137	2.07873e+06	276784	1.65724e+06	1.68275e+06	208394	2.38876e+06	932453	3.21125e+07	1.94053e+06	706570	2.73984e+06	1.77133e+06	763951	1.45032e+06	1.08582e+06	751788	579132	480905	1.00123e+06	547514	453800	251416	481173	484296	391113	1.90822e+06	755491	122321	1.0364e+06	545984	377170	1.51977e+06	256403	7.74096e+06	989159	199372	705092	360170	453094	466879	423792	949342	1.37495e+07	5.8255e+06	3.12112e+06
120.04158@1.132-QP	1.38881e+07	1.09972e+07	1.51275e+07	9.21701e+06	1.67807e+07	8.19374e+06	1.85467e+07	1.50937e+07	4.98836e+06	3.2912e+07	1.33846e+07	1.57163e+07	1.85996e+07	1.1976e+07	1.77876e+07	2.1707e+07	1.29975e+07	1.25935e+07	8.60814e+06	1.14156e+07	1.19975e+07	6.90351e+06	1.32989e+07	1.06634e+07	8.02736e+06	1.16454e+07	2.31242e+07	7.8402e+06	1.15708e+07	1.68657e+07	1.70441e+07	1.26117e+07	1.49176e+07	1.39915e+07	6.60871e+06	1.6059e+07	1.33407e+07	2.27091e+07	1.0256e+07	2.0497e+07	1.51928e+07	8.89252e+06	1.98346e+07	8.75785e+06	9.81838e+06	12984722	1.48359e+07	1.97011e+07	9.53374e+06
120.05688@1.41-QP	1.22338e+07	9.97886e+06	8.91079e+06	1.06536e+07	1.37927e+07	9.5774e+06	7.20008e+06	1.17499e+07	2.66336e+06	1.08525e+07	9.63224e+06	9.56352e+06	9.5749e+06	7.66328e+06	1.61145e+07	9.91553e+06	1.53597e+07	1.48762e+07	9.32589e+06	1.44905e+07	6.65268e+06	7.01516e+06	1.14749e+07	1.24929e+07	7.20625e+06	1.50137e+07	1.77249e+07	1.12588e+07	6.90768e+06	8.22228e+06	1.46571e+07	1.07142e+07	5.01504e+06	9.44981e+06	1.31887e+07	1.26309e+07	8.88422e+06	8.90844e+06	8.06513e+06	5.48154e+06	9.05479e+06	1.02159e+07	9.29066e+06	1.14949e+07	1.13049e+07	9.74119e+06	1.41508e+07	8.43444e+06	7.59445e+06
120.05689@9.073-QP	822038	2.62229e+06	479985	1.95235e+06	2.76398e+06	2.13766e+07	257994	691260	53224.5	1.64296e+07	4.33845e+07	2.52514e+06	1.72838e+06	1.36839e+07	917767	4.20724e+06	1.28661e+06	5.64906e+06	389890	747586	1.12701e+06	149150	2.3788e+06	1.28013e+06	1.80201e+06	1.81201e+06	910009	686358	1.31089e+06	1.09655e+07	448415	118885	688727	4.57997e+06	4.01864e+06	1.0807e+06	2.35637e+06	481345	1.08919e+06	234186	1.13658e+06	371799	1.92449e+06	529533	1.65789e+06	1.86873e+07	6.61328e+06	798069	1.27409e+07
120.07615@1.826-QP	6.86181e+07	6.2759e+07	7.195e+07	5.82597e+07	1.1125e+08	5.7712e+07	7.55507e+07	1.02199e+08	1.63696e+07	1.83596e+08	1.21009e+08	7.97324e+07	5.7491e+07	6.10972e+07	7.47347e+07	6.06531e+07	6.22782e+07	8.01249e+07	5.2379e+07	7.79358e+07	6.51331e+07	4.29361e+07	6.60451e+07	8.65838e+07	6.82495e+07	4.7503e+07	1.01776e+08	4.72075e+07	4.43649e+07	8.19999e+07	1.04959e+08	1.10674e+08	6.03891e+07	4.88303e+07	4.0152e+07	6.07677e+07	6.50302e+07	1.91009e+08	4.78792e+07	7.97603e+07	6.57183e+07	7.4559e+07	6.11643e+07	5.25093e+07	4.6903e+07	6.93251e+07	5.26982e+07	1.16058e+08	4.08219e+07
Tris(hydroxymethyl)aminomethane@1.012-QP	3.1027e+06	1.8512e+06	1.63505e+06	1.15166e+06	2.37477e+06	1.36375e+06	1.31045e+06	2.21031e+06	531320	3.60199e+06	3.16159e+06	1.07769e+06	2.65753e+06	968794	1.75535e+06	2.0444e+06	1.47672e+06	945080	2.27902e+06	2.54953e+06	1.14731e+06	1.0748e+06	1.30324e+06	1.43118e+06	1.37883e+06	1.30484e+06	4.44273e+06	1.57102e+06	4.92716e+06	2.06259e+06	1.744e+06	1.57729e+06	1.85233e+06	1.97726e+06	1.69585e+06	1.44633e+06	1.65695e+06	1.97095e+06	2.33024e+06	2.07744e+06	2.37946e+06	1.11425e+06	1.17411e+06	1.32811e+06	1.45479e+06	1.59762e+06	1.07627e+06	1.73522e+06	1.12319e+06
4-Hydroxybenzaldehyde@1.411-QP	4.95464e+07	4.02448e+07	3.48854e+07	3.97964e+07	5.96117e+07	4.00131e+07	2.7742e+07	4.3527e+07	7.18157e+06	4.84539e+07	3.58212e+07	3.33248e+07	3.35594e+07	2.853e+07	6.81896e+07	3.70052e+07	5.12871e+07	5.1297e+07	3.0361e+07	5.02454e+07	2.21022e+07	2.21372e+07	4.2185e+07	5.286e+07	2.84786e+07	5.10836e+07	6.21738e+07	3.90814e+07	2.67491e+07	3.32475e+07	5.22401e+07	4.37353e+07	2.52969e+07	2.98719e+07	4.3805e+07	5.06507e+07	3.72822e+07	3.43515e+07	3.17703e+07	2.87786e+07	3.41536e+07	3.22359e+07	3.42976e+07	3.60276e+07	3.53739e+07	3.32635e+07	5.097e+07	2.92755e+07	2.35138e+07
Niacinamide@2.665-QP	676300	343574	602239	272900	327572	351024	195396	301574	92955.4	267461	551487	818535	172835	631941	390480	235606	171419	347729	237948	378405	323833	321395	243827	374512	333454	288370	453115	271440	315550	793012	275832	509511	249268	210425	361215	205937	584821	185369	398516	482939	290717	345066	2.36723e+06	451897	234342	308382	410460	223578	190211
Niacinamide@2.259-QP	5.54788e+06	4.56909e+06	4.80263e+06	2.72256e+06	3.78075e+06	4.87927e+06	3.37408e+06	3.00476e+06	431934	1.45246e+06	3.4635e+06	1.0382e+07	2.82186e+06	7.0749e+06	4.06183e+06	2.12711e+06	2.04844e+06	3.36128e+06	4.12188e+06	7.04505e+06	3.99956e+06	2.89035e+06	2.9763e+06	4.86568e+06	4.49145e+06	2.96949e+06	6.33576e+06	3.62837e+06	3.4309e+06	1.21908e+07	3.74225e+06	5.38432e+06	2.22091e+06	4.2458e+06	2.26987e+06	1.25906e+06	1.14832e+07	3.47356e+06	5.6002e+06	2.70094e+06	2.54798e+06	4.67589e+06	4.49727e+07	4.29822e+06	2.61389e+06	4.8414e+06	3.80349e+06	2.08661e+06	2.45225e+06
123.03131@1.419-QP	8.63794e+06	867399	643774	188148	1.02804e+06	516434	572581	1.67796e+06	61522.7	5.58608e+06	865506	878338	914499	1.32623e+06	921884	803741	653406	525566	672477	651065	911395	395919	789398	472308	614227	882374	919039	539266	531338	715123	1.70058e+06	632130	793486	562772	489644	1.65307e+06	1.07008e+06	1.17022e+06	858901	1.2292e+06	978009	340402	864341	459929	263141	636528	1.03144e+06	1.81772e+06	788072
pyrazinamide@6.764-QP	1.7706e+07	1.20215e+06	475531	1.07601e+07	1.40796e+06	1.23495e+06	1.59772e+06	6.49892e+06	196870	1.21082e+07	3.17742e+06	2.09086e+06	4.45349e+06	2.55316e+06	1.09324e+07	3.52137e+06	4.00973e+06	1.41391e+07	2.14354e+06	223649	4.12882e+06	1.51517e+06	1.33102e+07	1.62702e+07	3.92779e+06	3.21169e+06	3.52815e+06	1.60013e+06	8.01554e+06	3.30219e+06	3.17572e+06	239627	605638	3.92169e+06	6.53463e+06	6.50138e+06	1.90125e+06	340114	2.79874e+06	22223.9	22294.2	974641	532890	777686	1.61074e+06	5.26432e+06	1.48392e+07	3.46591e+06	3.00642e+06
107089@2.636-QP	63767.1	57913.4	61763.6	53774.9	48386.8	47530.8	46240	43069.9	41381.7	48505.3	41853.8	43620.4	40373.2	40684.3	43911	40739	40599.6	37518.3	37850.9	36962.2	37798.3	37133.2	37063.6	36508.6	36292	39015.1	36467.9	37480.5	40785.2	39050.2	6.9978e+06	36825	43659.9	2.47791e+07	39505.7	39168.1	40609.4	42001.4	40766.1	41385.8	40982.2	40691.8	35572.1	37989.6	38257.3	36277.3	36263.8	45868.2	35427.8
Hydroxybenzoquinone@2.317-QP	4.17281e+06	3.46474e+06	114863	219628	151526	569968	597177	324768	145953	391033	2.33627e+06	1.77953e+07	2.38576e+06	548005	81708	1.01667e+06	4.32505e+06	373291	86198	305766	666830	127967	2.14335e+06	195049	693711	244037	82768.8	188969	682788	298015	2.9952e+06	115617	97206.2	1.13694e+06	4.48636e+06	5.07961e+06	78539	635720	155667	108179	158253	186325	109278	143363	378454	1.24476e+06	1.00475e+06	6.11524e+06	92854.8
2-methoxyphenol@9.902-QP	127536	294673	169675	105628	55211.5	116746	165349	135915	41369.8	61130.2	50009.3	171452	109042	115203	147284	98947.7	136151	97823.4	64384.9	86458.3	38615.3	136724	99739.9	79375.3	85126.2	76209.5	921552	92201.2	150843	118731	99475.6	108425	774375	128789	63664.3	105055	109483	54085.7	99681.8	147063	106850	139629	112592	83402	79289.7	42659	84421.8	105176	51366.1
GV9100000@2.635-QP	65447	59439.1	102895	132957	50950.2	190918	142961	98070.3	126552	75846.1	116878	151117	157003	89389.3	82410.5	41812.2	157846	132693	177319	177167	135500	38111.5	122393	179408	163383	156204	140151	77019.1	44227.3	40079	4.66473e+06	146942	95580	1.69242e+07	132843	196149	68155.1	106329	165112	182752	157843	165280	151539	53823.9	113964	47331.6	145863	136699	175652
125.0137@1.221-QP	183754	182604	337024	1.17857e+07	1.02212e+07	1.12199e+07	1.61292e+07	10647925	6.26546e+06	6.00998e+06	1.16037e+07	1.12433e+07	8.21951e+06	1.00241e+07	8.38442e+06	8.14801e+06	8.29504e+06	9.32457e+06	1.27042e+07	1.1714e+07	1.13217e+07	8.81621e+06	1.60969e+07	1.60679e+07	1.06005e+07	5.9576e+06	1.19328e+07	1.15179e+07	1.15774e+07	1.08807e+07	1.47208e+07	1.56236e+07	9.05226e+06	7.19732e+06	5.39855e+06	1.51617e+07	1.57246e+07	1.02165e+07	1.05234e+07	3.46447e+07	1.42665e+07	2.24725e+07	1.19975e+07	1.29438e+07	6.13e+06	1.44285e+07	1.02953e+07	4.9412e+06	8.96348e+06
125.01398@1.003-QP	1.67127e+07	2.24846e+07	5.5333e+07	2.08806e+07	2.21702e+07	2.12272e+07	3.34813e+07	1.82218e+07	2.16956e+07	1.33791e+07	2.11858e+07	2.3061e+07	1.40833e+07	2.4851e+07	1.44907e+07	1.42647e+07	1.99102e+07	1.80185e+07	2.23887e+07	2.24873e+07	2.06059e+07	1.86774e+07	2.99113e+07	2.9798e+07	2.06279e+07	1.28009e+07	22492010	2.52119e+07	2.66947e+07	2.33527e+07	3.52736e+07	2.72407e+07	1.6576e+07	1.71852e+07	1.19997e+07	3.15002e+07	3.52866e+07	1.82677e+07	2.14865e+07	7.01483e+07	3.41841e+07	4.27727e+07	2.73122e+07	3.25267e+07	1.38566e+07	2.5681e+07	2.13504e+07	1.10015e+07	1.7034e+07
Taurine@1.19-QP	9.94397e+06	1.77063e+07	3.1843e+07	1.71385e+07	1.44058e+07	1.85466e+07	2.51373e+07	1.54448e+07	8.71169e+06	8.75505e+06	1.74128e+07	1.5641e+07	12055877	1.55837e+07	1.19394e+07	1.17262e+07	1.27644e+07	1.32435e+07	1.74766e+07	1.68207e+07	1.67061e+07	1.26441e+07	2.30855e+07	2.38487e+07	1.56866e+07	8.7836e+06	1.74923e+07	1.72349e+07	1.83529e+07	1.62884e+07	2.1842e+07	2.17918e+07	1.29501e+07	1.07166e+07	7.68056e+06	2.20753e+07	2.35235e+07	1.45194e+07	1.72663e+07	4.97354e+07	2.11226e+07	3.21398e+07	1.81293e+07	1.95068e+07	8.79609e+06	1.93389e+07	1.55336e+07	5.94372e+06	1.25249e+07
5-Nitropyrimidine@1.668-QP	3.38585e+07	4.99108e+07	5.33481e+07	3.15197e+07	5.22407e+07	3.89207e+07	4.26578e+07	4.3295e+07	1.14762e+07	6.29758e+07	5.2299e+07	4.72652e+07	6.77545e+07	4.47341e+07	5.64909e+07	6.11517e+07	5.22918e+07	4.75481e+07	3.90049e+07	3.90182e+07	2.71611e+07	2.04722e+07	5.23959e+07	4.16871e+07	39324602	3.35838e+07	4.84005e+07	3.47486e+07	5.15282e+07	6.0107e+07	3.71778e+07	3.90944e+07	67434304	5.38706e+07	3.6243e+07	4.55796e+07	6.86026e+07	5.38391e+07	4.87408e+07	5.64424e+07	5.59278e+07	2.88619e+07	7.91873e+07	3.85847e+07	3.22351e+07	4.98772e+07	5.53995e+07	6.87747e+07	7.14175e+07
5-Butyloxazole@5.011-QP	53242.7	54612	55130.1	62051.5	57166.1	173433	61008.3	43765.9	47288.7	121598	64112.2	2934156784	127909	805324886	122206	42518.1	110281	43269.1	41772.8	54321.6	40614.1	66505.9	42274.9	110888	49762.9	41852.9	95228.6	102792	42256.2	93812.5	150695	116652	134516	110118	61273.9	43054.8	40885.6	120918	40027	98486.9	117721	100655	1144175744	99907.4	92304.9	44964.1	92075.5	103872	100040
NQ8650000@6.242-QP	433720	147670	140200	43904.8	183553	78043.1	42792.8	79563.9	46765.2	284464	1.32659e+06	2.1337e+08	162703	6.29346e+07	83248.3	93375.5	112984	95737.6	47497	79683.1	36799.1	101446	34377.3	144511	127841	87438.1	60443.4	78159.5	67613.4	324946	39752.3	137631	126561	231935	54494.4	128836	959999	203641	94440.9	189326	107680	58784.7	8.05503e+07	78073.3	30278.4	96471.9	1.28106e+06	266653	191549
5hydroxymethylfurfural@1.044-QP	6.06361e+07	5.03349e+07	7.47146e+07	6.13184e+07	8.42114e+07	5.94571e+07	5.34483e+07	4.47601e+07	1.11321e+07	5.47174e+07	1.10583e+08	5.26257e+07	4.94914e+07	4.99395e+07	1.46013e+08	4.06517e+07	2.5026e+07	3.74885e+07	5.16956e+07	4.41061e+07	4.25467e+07	3.58123e+07	4.48963e+07	6.5045e+07	4.53676e+07	4.4564e+07	3.1714e+07	5.58355e+07	5.17029e+07	6.01134e+07	2.6744e+07	7.08125e+07	4.1532e+07	4.57828e+07	4.71076e+07	5.00073e+07	4.13325e+07	1.18723e+08	4.89557e+07	5.3444e+07	5.02082e+07	3.86935e+07	2.88565e+07	4.59404e+07	5.26803e+07	4.13053e+07	4.484e+07	124349018	5.31428e+07
1-methyl-4-nitroimidazole@4.863-QP	80498.9	182343	255194	229939	205293	243737	241698	203170	84800.1	511414	260125	360379	191105	322962	282741	316012	223314	179323	148118	164504	199710	208204	202966	188136	241149	143435	233256	156675	163213	322474	283804	171060	901010	151842	225366	277225	256063	285693	238765	216385	246656	152533	224319	160713	161325	169563	211608	235937	236669
128.00228@10.333-QP	44522.1	67734.3	51289.6	45804	696658	45185.2	54135.2	7.14989e+06	32780	35289.2	58334.9	48124.1	102488	44057.8	44469.2	41409.9	43944	55870.1	37599.2	38415.4	80766	38608.2	680239	40905	43059.1	37888.8	48201.2	6.59084e+06	46040.1	55236.8	4.05166e+06	42169.8	276357	54327	49938.8	37467.2	1.93253e+06	43646.8	42066.1	46926.9	46040.5	47650.4	42514.4	38439	648089	37988.5	42681.8	159572	37376.5
2-hydroxyhexdienoicacid@1.063-QP	3.95273e+06	3.16817e+06	4.63742e+06	3.57814e+06	6.6475e+06	3.19001e+06	3.90452e+06	3.52199e+06	516749	3.77031e+06	4.29765e+06	3.10484e+06	3.60738e+06	2.57085e+06	5.24553e+06	2.21804e+06	1.84352e+06	1.18332e+06	2.12771e+06	2.87028e+06	1.39458e+06	792880	2.65815e+06	2.89302e+06	1.19112e+06	1.57452e+06	1.71413e+06	2088323	1.06513e+06	3.29543e+06	2.8409e+06	2.90036e+06	1.50405e+06	1.3598e+06	1.96976e+06	2.48764e+06	1.75807e+06	5.13607e+06	1.92454e+06	1.74097e+06	2.12924e+06	2.15397e+06	2.40902e+06	1.97701e+06	1.48957e+06	2.3012e+06	1.84704e+06	4.64933e+06	1.63221e+06
4-amino-4-cyanobutanoicacid@1.027-QP	4.22892e+06	1.65302e+07	2.56945e+07	9.49249e+06	7.557e+06	1.57071e+07	1.96794e+07	3.77192e+06	1.62588e+07	3.11694e+07	8.38128e+06	5.54362e+07	3.73536e+07	2.96918e+07	1.04068e+07	4.20544e+07	3.14635e+07	1.83424e+07	7.06102e+06	1.90813e+07	3.99635e+06	6.27578e+06	1.73765e+07	6.49068e+06	5.27216e+06	1.20653e+07	2.67409e+07	1.06208e+07	8.39992e+06	3.78857e+07	7.45879e+06	1.78565e+07	2.813e+07	5.49834e+06	1.64388e+07	2.07337e+07	1.24692e+07	2.40098e+07	2.52632e+07	2.06154e+07	5.63425e+07	5.86492e+06	3.94877e+07	7.27027e+06	5.6477e+06	4.39832e+06	7.32848e+06	1.54687e+07	3.1716e+07
4-Oxoproline@1.401-QP	1.92502e+08	2.22877e+08	2.14458e+08	2.92289e+08	1.76007e+08	1.73275e+08	2.17087e+08	1.93884e+08	1.07252e+08	3.10474e+08	1.69376e+08	4.04654e+08	1.80338e+08	2.31594e+08	1.44312e+08	2.38185e+08	1.50658e+08	3.07781e+08	229067409	3.74229e+08	2.29346e+08	2.14162e+08	2.93135e+08	346322234	3.50811e+08	1.54452e+08	1.94907e+08	1.76772e+08	2.0009e+08	3.18263e+08	2.96173e+08	2.73106e+08	1.79071e+08	1.33195e+08	2.03193e+08	2.07393e+08	1.83961e+08	3.99106e+08	2.25891e+08	8.07715e+08	204264227	1.79467e+08	2.36035e+08	1.58849e+08	1.29943e+08	127388588	1.46899e+08	2.14713e+08	136129268
L-Pyroglutamicacid@1.007-QP	1.20747e+08	1.25591e+08	1.11387e+08	1.63466e+08	1.21144e+08	1.21647e+08	9.34386e+07	9.70124e+07	115023112	1.05078e+08	1.23997e+08	132310442	1.48289e+08	1.30606e+08	1.10196e+08	1.03275e+08	1.21405e+08	1.50196e+08	138775849	1.38782e+08	1.568e+08	1.59932e+08	1.11419e+08	1.41694e+08	1.1278e+08	2.04133e+08	1.06919e+08	1.4637e+08	1.20293e+08	1.34536e+08	1.21619e+08	1.8152e+08	1.11803e+08	110371411	1.78955e+08	1.62373e+08	1.43883e+08	9.00735e+07	1.88728e+08	8.44137e+07	1.2222e+08	6.08822e+07	1.1207e+08	1.32987e+08	1.25417e+08	1.09521e+08	1.21417e+08	8.0744e+07	1.61596e+08
L-Pyroglutamicacid@1.178-QP	8.11064e+07	9.26009e+07	9.32763e+07	1.07773e+08	8.41708e+07	9.30853e+07	8.1616e+07	8.82072e+07	4.45613e+07	6.99408e+07	7.55356e+07	8.29233e+07	9.29672e+07	9.82823e+07	7.59255e+07	8.45266e+07	7.44024e+07	9.99715e+07	7.3249e+07	9.58055e+07	5.83756e+07	7.85205e+07	8.15019e+07	8.70358e+07	6.86912e+07	9.18504e+07	9.56249e+07	9.29758e+07	8.17278e+07	9.54838e+07	8.36167e+07	1.18894e+08	7.59672e+07	7.5812e+07	1.05912e+08	9.47112e+07	1.11482e+08	6.88067e+07	1.29423e+08	7.51333e+07	6.69213e+07	4.21389e+07	7.8975e+07	7.52158e+07	7.36898e+07	7.04098e+07	8.22813e+07	5.15854e+07	7.98922e+07
4-oxoproline@6.491-QP	3.34046e+06	1.71927e+07	1.777e+07	1.16739e+07	2.28229e+06	4.48881e+06	1.70328e+07	1.76094e+07	951486	2.677e+07	2.13014e+07	3.13575e+07	1.30906e+07	2.50517e+07	1.15066e+07	3.26983e+07	2.08915e+07	9.08362e+06	1.93913e+07	3.62284e+06	4.78176e+06	7.30301e+06	1.64219e+07	1.22684e+07	4.21623e+06	2.44075e+06	8.77988e+06	1.47448e+07	3.58952e+06	2.31374e+07	1.5986e+07	2.45415e+06	2.80734e+07	9.71951e+06	4.58205e+06	1.75923e+07	1.41187e+07	4.26827e+07	2.36073e+07	9.72972e+06	2.54477e+07	3.58968e+06	1.3822e+07	9.71372e+06	4.10848e+06	1.11421e+07	5.69609e+06	1.38171e+07	1.41067e+07
Isoquinoline@9.305-QP	1.59855e+07	2.5908e+07	5.95446e+07	1.96538e+07	2.11802e+07	2.09259e+07	3.45654e+07	4.68829e+07	1.64443e+06	3.66666e+07	6.06153e+07	3.81737e+08	5.05776e+07	4.18737e+07	2.81752e+07	3.73119e+07	5.19407e+07	4.48794e+07	4.07827e+07	4.21788e+07	1.54374e+07	1.90411e+07	5.20005e+07	3.82149e+07	3.33103e+07	1.87034e+07	1.72494e+07	4.02859e+07	2.41289e+07	3.23619e+07	2.66656e+07	3.74766e+07	3.74041e+07	3.25179e+07	5.17249e+07	5.90619e+07	2.80103e+07	2.92692e+07	2.13203e+07	1.15249e+07	3.14683e+07	1.87645e+07	2.61458e+07	2.77965e+07	28261342	3.31707e+07	7.9896e+07	2.33877e+07	9.11459e+07
Isoquinoline@10.736-QP	1.76362e+06	1.96471e+07	4.51699e+06	3.41039e+07	3.822e+07	3.75902e+07	5.88963e+06	6.19876e+06	99752.1	170163	178671	177399	3.56548e+07	1.97463e+07	3.09505e+07	1.91544e+07	2.44892e+07	7.51382e+06	9.6083e+06	6.61681e+06	1.31336e+07	7.61104e+06	2.32094e+07	8.59685e+06	1.96386e+07	1.1995e+07	8.41558e+06	1.10937e+07	4.76281e+06	1.07388e+07	2.01172e+07	5.15613e+06	3.06951e+07	5.09533e+06	4.44717e+07	2.95335e+07	2.43486e+07	2.02684e+07	1.05102e+08	1.35056e+06	9.27389e+06	1.52363e+07	1.233e+07	2.16078e+07	3.58274e+07	1.83886e+07	5.37805e+07	3.85193e+06	4.17734e+07
Gramine@2.959-QP	2.49751e+07	2.72598e+07	2.60884e+07	3.00383e+07	2.90937e+07	3.11967e+07	2.83802e+07	2.36645e+07	5.24983e+06	2.64553e+07	2.20871e+07	2.3178e+07	3.15764e+07	2.45047e+07	3.94554e+07	2.73611e+07	3.11681e+07	3.77927e+07	2.25946e+07	3.45458e+07	2.22745e+07	1.86326e+07	3.04965e+07	3.13348e+07	3.32471e+07	3.42562e+07	3.50495e+07	2.64643e+07	2.27988e+07	1.96995e+07	2.65021e+07	1.53634e+07	2.22436e+07	2.71368e+07	2.31797e+07	2.56531e+07	3.38232e+07	2.36143e+07	2.41475e+07	2.0031e+07	2.36995e+07	2.10921e+07	3.73702e+07	2.94678e+07	2.77691e+07	3.29396e+07	3.15343e+07	2.44391e+07	2.41144e+07
leucoline@8.153-QP	3.90083e+06	5.72454e+06	5.5886e+06	6.93114e+06	7.32581e+06	6.58491e+06	4.65874e+06	3.43985e+06	348917	3.01993e+07	1.09933e+07	5.24044e+06	9.10971e+06	1.1283e+07	1.20929e+07	8.60801e+06	7.71059e+06	6.79359e+06	6.02534e+06	6.64965e+06	3.68652e+06	1.93898e+06	8.93813e+06	5.34632e+06	9.23643e+06	4.57714e+06	5.79604e+06	6.00054e+06	2.8869e+06	4.77383e+06	7.02757e+06	1.43255e+06	3.62901e+06	5.34857e+06	5.12518e+06	5.23794e+06	3.99453e+06	1.02294e+07	1.32249e+07	7.40644e+06	2.93494e+06	8.3079e+06	9.00994e+06	5.00974e+06	2.29643e+06	6.8187e+06	8.01204e+06	1.46128e+07	5.66196e+06
129.07816@1.022-QP	2585804338	2032862242	1460352593	1147009917	2177523900	1336634639	1468153129	1811398559	3.6244e+08	1066654130	2008156142	1894131718	1714703603	1144380889	1943480445	1416911534	1152205278	1312940671	1169095756	1227076388	9.05697e+08	841819851	1312880911	1413008307	1076641326	1486331409	1623075929	1728184528	1747897292	1971763311	1005854662	1862025261	584723227	1841053738	1188619300	9.1216e+08	1506207254	1417036058	1862893974	1253220960	1192441537	1071153672	1854910972	1845629569	1254580564	1434894117	1656084227	1154074632	1112658597
4-acetamidobutanal@1.017-QP	2585688057	2034196421	1457849003	1138314764	2174137879	1331189130	1460884898	1809984392	3.33584e+08	1063300300	2006630475	1885857775	1713649532	1141782942	1911501832	1421187950	1104971317	1309812408	1169393642	1227530904	9.0578e+08	8.44754e+08	1313188525	1413385143	1076955007	1486655495	1618725168	1723894048	1748435135	1950893515	1006450702	1822549801	5.82703e+08	1841761479	1188929096	9.12851e+08	1505098083	1381181001	1863652037	1257258800	1192940676	1067306104	1858909788	1839163349	1210408826	1435458525	1661147920	1153586724	1115422745
4-acetamidobutanal@0.858-QP	4.86152e+07	4.64544e+07	4.9067e+07	5.47536e+07	8.02875e+07	4.5009e+07	4.0951e+07	5.2581e+07	3.41398e+07	7.47902e+07	3.64994e+07	3.71611e+07	6.07249e+07	5.56757e+07	5.34295e+07	4.30365e+07	6.45822e+07	5.41541e+07	4.47802e+07	5.94225e+07	4.70856e+07	3.71036e+07	5.20208e+07	5.55432e+07	3.41565e+07	7.0744e+07	5.78724e+07	4.05024e+07	3.67651e+07	4.44151e+07	4.40366e+07	5.41878e+07	4.18152e+07	4.14443e+07	2.6822e+07	4.57501e+07	4.84506e+07	2.87376e+07	5.19718e+07	4.22157e+07	5.4632e+07	2.68956e+07	4.5649e+07	6.00482e+07	6.32102e+07	5.69347e+07	5.81055e+07	3.07315e+07	4.46361e+07
Metformin@1.059-QP	271719	246027	271816	213848	322125	257652	318266	701544	48312	222308	275892	198599	190738	229671	339087	257020	139889	181164	131574	182565	125126	130054	173531	197664	160547	159167	242962	206204	226203	234677	201113	255464	164080	211619	189579	231866	255099	374993	208741	285716	169216	177092	240201	216402	204517	205795	237300	6.42647e+08	175251
2,5-dioxopentanoicacid@2.026-QP	2.68698e+06	324594	605119	1.47348e+06	706552	573040	844468	2.58486e+06	241390	1.84523e+06	740137	603226	876509	658016	367451	5.62241e+06	1.60552e+06	1.12952e+06	648857	774306	1.95037e+06	326437	1.39976e+06	1.55992e+06	712575	559154	1.66637e+06	496585	2.55564e+06	1.54811e+06	1.15791e+06	716329	439727	1.04463e+06	1.4311e+06	1.62453e+06	465150	775124	591708	1.00295e+06	806409	546509	371012	385863	555158	1.35339e+06	3.38805e+06	1.02065e+06	600429
1aH-Indeno(1,2-b)oxirene@1.825-QP	2.02297e+07	1.75737e+07	1.97695e+07	1.6021e+07	3.00105e+07	1.52395e+07	2.05979e+07	2.85897e+07	5.23187e+06	5.08277e+07	3.39852e+07	2.21826e+07	1.61296e+07	1.80855e+07	2.22418e+07	1.77463e+07	1.89242e+07	2.2067e+07	15569028	2.2829e+07	1.94131e+07	1.27509e+07	1.95165e+07	2.49356e+07	2.06674e+07	1.44008e+07	3.07398e+07	1.33488e+07	1.18606e+07	2.32935e+07	3.09846e+07	3.31986e+07	1.78668e+07	1.50181e+07	1.17827e+07	1.86087e+07	1.8598e+07	5.16334e+07	1.37168e+07	2.30378e+07	1.92847e+07	2.27655e+07	1.82237e+07	1.52378e+07	1.309e+07	2.14316e+07	1.503e+07	3.23205e+07	1.21398e+07
1099281@9.003-QP	43397.6	112567	608536	819303	706521	845974	786374	593049	60111.8	162962	66240.2	210301	1.01185e+06	506223	121694	3.70947e+06	711115	28630.1	215138	101268	815483	918470	2.8303e+06	2.27486e+06	1.3508e+06	198540	212945	505752	495117	2.32688e+06	397520	151433	83628.2	398175	2.06463e+07	609252	432741	1.04444e+06	2.10108e+06	368513	109713	121207	547736	264159	386677	638945	638612	205144	694580
Quinazoline@9.493-QP	184902	188238	184228	190965	194920	185793	183390	197331	195976	183776	206104	192259	1.743e+06	204828	194018	186656	181562	190545	191594	191308	174625	175739	179773	188617	184946	191320	173999	195970	186182	181832	181259	186902	6.07029e+06	183565	195451	185466	190916	210310	194161	186335	198361	165885	181978	178711	195712	182286	188867	114125	126648
2-(oxolan-2-yl)aceticacid@2.687-QP	1.42086e+08	1.24043e+08	1.69033e+08	1.68133e+08	1.96561e+08	116036010	1.81682e+08	1.49445e+08	1.78574e+07	1.33745e+08	1.3018e+08	2.55288e+07	1.76479e+08	1.64613e+08	2.86397e+08	1.42066e+08	140285933	155113692	1.05344e+08	1.77635e+08	1.15812e+08	7.87176e+07	1.19351e+08	8.72443e+07	1.31314e+08	1.91943e+08	1.66757e+08	1.37117e+08	1.06844e+08	1.31531e+08	7.15568e+07	1.46767e+08	1.13559e+08	135718479	7.44726e+07	1.86667e+08	203584943	1.9428e+08	2.22713e+08	4.00277e+08	2.21115e+08	1.22191e+08	2.81764e+08	1.9735e+08	1.8769e+08	1.76442e+08	7.82354e+07	1.95451e+08	9.53839e+07
2-(oxolan-2-yl)aceticacid@2.991-QP	256262858	222085357	3.42357e+08	2.89242e+08	403569679	2.27722e+08	3.25801e+08	2.54024e+08	4.97028e+07	2.37264e+08	2.50704e+08	4.09532e+07	3.38514e+08	3.21014e+08	505003215	2.69907e+08	2.60788e+08	3.34835e+08	2.16156e+08	3.5732e+08	2.06872e+08	1.45356e+08	2.52394e+08	1.64668e+08	2.30841e+08	3.8797e+08	3.65049e+08	1.80874e+08	1.68701e+08	2.6264e+08	118601960	3.02691e+08	1.89285e+08	2.19152e+08	1.09999e+08	3.81331e+08	5.3572e+08	2.81457e+08	4.27888e+08	7.72443e+08	3.77705e+08	239689621	5.79331e+08	3.69896e+08	3.05457e+08	3.29687e+08	1.39416e+08	498137376	138654641
131.05757@1.581-QP	6.88236e+06	9.18255e+06	7.09255e+06	5.26405e+06	8.01323e+06	6.05007e+06	9.61825e+06	7.92584e+06	1.73909e+06	1.62631e+07	6.01876e+06	9.54854e+06	8.2489e+06	9.16716e+06	9.87653e+06	9.67045e+06	7.69191e+06	8.7606e+06	7.45293e+06	6.75226e+06	5.22516e+06	3.78925e+06	5.91385e+06	5.96149e+06	6.78355e+06	4.71637e+06	8.34628e+06	6.68819e+06	6.05646e+06	9.89252e+06	9.19304e+06	9.00365e+06	7.87096e+06	8.12559e+06	4.74796e+06	8.14273e+06	8.33657e+06	1.25294e+07	9.2735e+06	1.78027e+07	1.02205e+07	1.0642e+07	1.47918e+07	6.43956e+06	4.64378e+06	5.75056e+06	7.2002e+06	1.92444e+07	1.14569e+07
2-amino-4-oxopentanoicacid@1.691-QP	1.28703e+06	238676	405770	165929	561713	193104	1.73057e+06	297123	102718	1.92252e+06	792694	1.01556e+06	295560	277161	1.21433e+06	847491	230891	898578	1.05066e+06	740262	902055	525127	220518	871209	705000	844725	1.21437e+06	929813	3.17598e+06	909787	719158	956659	997738	1.15476e+06	681777	875376	818045	1.28772e+06	626014	1.23615e+06	1.16506e+06	925187	1.23538e+06	673474	747993	227462	760829	1.30269e+06	834710
2-amino-4-oxopentanoicacid@1.02-QP	4.35773e+06	2.30087e+06	1.99778e+06	1.98496e+06	2.03016e+06	3.40847e+06	3.14229e+06	2.26973e+06	2.01113e+06	2.86112e+06	2.11045e+06	2.41425e+06	4.40771e+06	1.80677e+06	2.6575e+06	2.91151e+06	2.61805e+06	1.40948e+06	2.87714e+06	1.1329e+06	4.59915e+06	2.0778e+06	2.67212e+06	2.69875e+06	1.68449e+06	2.97179e+06	3.20241e+06	4.35723e+06	6.91861e+06	2.3475e+06	4.21952e+06	2.4526e+06	3.52612e+06	3.86579e+06	2.13113e+06	1.72329e+06	1.54568e+06	2.62112e+06	4.45474e+06	1.66872e+06	2.47671e+06	2.09694e+06	4.32824e+06	2.41083e+06	2.72079e+06	2.47017e+06	2.16698e+06	1.49566e+06	3.92417e+06
2-amino-4-oxopentanoicacid@1.504-QP	7.67648e+06	9.90014e+06	7.95464e+06	6.03474e+06	8.9307e+06	6.78815e+06	1.0845e+07	7.99336e+06	1.83259e+06	1.81434e+07	6.81146e+06	1.04878e+07	9.156e+06	9.89055e+06	1.13404e+07	1.04833e+07	8.39887e+06	8.90629e+06	8.36899e+06	7.44667e+06	6.03293e+06	4.20487e+06	6.67045e+06	6.89739e+06	7.47793e+06	5.18556e+06	9.13445e+06	7.47753e+06	6.31822e+06	1.07322e+07	9.88819e+06	9.91808e+06	8.6581e+06	9.12531e+06	5.43091e+06	8.81995e+06	9.16272e+06	1.36403e+07	9.84594e+06	1.89965e+07	1.1285e+07	1.15758e+07	1.58661e+07	6.9931e+06	5.26477e+06	6.72205e+06	7.9205e+06	2.05094e+07	1.21114e+07
Creatine@1.296-QP	3.61e+07	3.55371e+07	1.13904e+07	6.25138e+06	1.86148e+07	2.32564e+07	4.02608e+06	4.14074e+07	3.30038e+06	8.7454e+06	3.10435e+07	2.34318e+07	3.54718e+07	1.13697e+07	1.74619e+07	6.2896e+06	1.01142e+07	1.32922e+07	3.37162e+07	1.093e+07	1.88771e+07	8.39847e+06	2.26564e+07	3.26687e+07	1.25647e+07	1.74339e+07	1.11539e+07	1.42929e+07	6.91429e+06	8.02377e+06	4.42108e+07	9.08032e+06	1.83403e+07	3.74329e+07	2.94342e+06	1.30791e+07	1.82356e+07	1.31357e+07	1.14486e+07	2.90228e+07	1.67825e+07	2.23313e+07	1.72685e+07	1.39875e+07	1.58312e+07	2.67695e+07	1.24186e+07	1.49478e+07	8.86269e+06
6-Methylindole@9.299-QP	1.56508e+06	2.47096e+06	5.78456e+06	1.81871e+06	2.15584e+06	2.02464e+06	3.65491e+06	5.16397e+06	138225	4.07286e+06	7.20617e+06	4.76208e+07	5.60256e+06	4.78819e+06	3.42938e+06	4.35912e+06	6.18107e+06	5.19046e+06	4.81435e+06	4.8832e+06	1.73906e+06	2.08814e+06	6.3863e+06	4.92546e+06	3.97866e+06	2.29776e+06	2.36663e+06	5.2333e+06	3.14653e+06	4.14683e+06	3.50394e+06	5.31096e+06	7.73727e+06	4.73516e+06	6.62631e+06	8.25119e+06	4.04124e+06	3.66949e+06	2.82347e+06	1.67506e+06	4.50871e+06	2.7973e+06	3.78144e+06	3.78598e+06	3.44426e+06	4.45554e+06	1.09602e+07	3.1911e+06	1.25573e+07
6-Methylindole@2.956-QP	4.12897e+07	4.74903e+07	4.77517e+07	5.60707e+07	5.15818e+07	5.56859e+07	5.37998e+07	3.49184e+07	4.034e+06	4.98874e+07	3.3548e+07	3.85418e+07	6.1574e+07	4.7284e+07	7.43576e+07	4.59175e+07	5.60868e+07	7.07344e+07	3.47178e+07	6.83545e+07	3.33355e+07	2.18153e+07	5.29518e+07	5.2849e+07	5.54636e+07	5.78245e+07	6.86389e+07	5.31348e+07	3.18536e+07	2.72092e+07	5.26338e+07	2.0549e+07	3.27774e+07	4.76104e+07	4.19735e+07	4.29453e+07	6.36003e+07	4.00162e+07	4.342e+07	3.27207e+07	4.16499e+07	3.38506e+07	7.0417e+07	4.96701e+07	4.52099e+07	5.78709e+07	5.56823e+07	4.19615e+07	3.51681e+07
L-(-)-Methionine@1.179-QP	5.41868e+07	4.1255e+07	4.5471e+07	5.6172e+07	5.91545e+07	4.10335e+07	4.28429e+07	4.98789e+07	1.29779e+07	8.74445e+07	3.36505e+07	3.14859e+07	4.47256e+07	3.5884e+07	5.17203e+07	3.49326e+07	6.59502e+07	51309977	2.74807e+07	5.45318e+07	2.75035e+07	2.53803e+07	4.39163e+07	4.31802e+07	3.66115e+07	5.20395e+07	6.75216e+07	3.74725e+07	1.97267e+07	4.56512e+07	4.39281e+07	60955367	1.6858e+07	29849448	3.91272e+07	3.99147e+07	4.70941e+07	3.37281e+07	5.73459e+07	4.71328e+07	4.66156e+07	3.21039e+07	5.96975e+07	4.23533e+07	5.02782e+07	4.27609e+07	3.36481e+07	3.00343e+07	3.93495e+07
D-(-)-Quinicacid@1.087-QP	117708584	1.34579e+07	2.85515e+07	5.93415e+07	7.06222e+07	3.91619e+07	2.99543e+07	6.9375e+07	6.72995e+06	1.97994e+08	3.38717e+07	3.83437e+07	4.99872e+07	1.83188e+07	4.70324e+07	1.26368e+08	1.83688e+07	6.62935e+07	1.7311e+07	1.59209e+07	4.65211e+07	1.01886e+07	7.51447e+07	6.73216e+07	1.85045e+07	3.78359e+07	5.99103e+07	1.46031e+07	6.39036e+07	5.56552e+07	3.61321e+07	2.1925e+07	2.39958e+07	3.14454e+07	5.8027e+07	5.6453e+07	1.82023e+07	3.99714e+07	3.76082e+07	2.15819e+07	1.71084e+07	1.27283e+07	1.69866e+07	2.01768e+07	1.83656e+07	4.42671e+07	9.56656e+07	6.28104e+07	1.64966e+07
[(Carbamoylamino)methyl]carbamate@2.09-QP	881598	1.61263e+06	698674	1.05931e+06	1.28225e+06	460237	991521	2.31412e+06	391365	1.05951e+06	1.0169e+06	1.42001e+06	755784	1.47408e+06	3.22625e+06	1.508e+06	2.76869e+06	7.71861e+06	3.01637e+06	3.0981e+06	763538	971681	1.30012e+06	1.67168e+06	1.12998e+06	619041	1.2666e+06	492319	1.25288e+06	1.90497e+06	1.88441e+06	899296	730490	1.52264e+06	1.60226e+06	1.49292e+06	1.56548e+06	1.33542e+06	1.49364e+06	1.53035e+06	1.22557e+06	739805	7.7522e+06	1.30962e+06	908228	848304	2.94197e+06	2.49552e+06	6.23727e+06
6-Hydroxycaproicacid@4.721-QP	5.32348e+06	6.15354e+06	7.89699e+06	1.34945e+07	1.12387e+07	5.03703e+06	8.88797e+06	7.18781e+06	1.60532e+06	1.41162e+07	1.08744e+07	179029662	8.31843e+06	7.62663e+06	12212473	1.78907e+07	6.52964e+06	4.84592e+06	5.14059e+06	8.36184e+06	4.29601e+06	3.78304e+06	7.5453e+06	5.87841e+06	5.50575e+06	3.70823e+06	4.86521e+06	8.19553e+06	6.24809e+06	8.38244e+06	7.10098e+06	6.42194e+06	7.177e+06	5.06967e+06	1.45001e+07	8.35929e+06	1.22969e+07	1.45441e+07	1.57757e+07	6.85698e+07	1.19529e+07	1.05498e+07	1.41833e+07	7.38681e+06	2.44278e+07	5.331e+06	7.24826e+06	1.28773e+07	5.80254e+06
2-hydroxycaproicacid@5.45-QP	1.47392e+06	1.35699e+06	3.13612e+06	2.34953e+06	2.05009e+06	1.16487e+06	1.43226e+06	1.38197e+06	170581	1.20471e+06	7.84667e+06	1.57494e+07	1.52025e+06	1.94382e+06	2.19807e+06	1.95752e+06	860812	1.0785e+06	1.00542e+06	1.27822e+06	768846	600360	867995	1.44516e+06	1.16697e+06	438910	847415	2.09586e+06	1.00414e+06	1.78711e+06	802783	1.78758e+06	1.74883e+06	695261	2.26695e+06	1.66495e+06	2.33199e+06	2.14271e+06	2.90237e+06	7.47031e+06	2.74442e+06	1.11594e+06	2.15014e+06	978123	421609	1.01579e+06	2.10914e+06	2.43374e+06	2.08368e+06
132.08902@1.019-QP	2.92511e+06	3.2485e+06	4.57798e+06	8.00619e+06	6.72769e+06	8.0869e+06	5.49994e+06	8.93845e+06	5.43985e+06	6.49765e+06	5.06424e+06	8.29706e+06	5.28166e+06	6.43404e+06	5.38116e+06	7.20622e+06	6.51017e+06	1.00169e+07	6.87644e+06	7.68829e+06	6.05036e+06	7.09973e+06	7.25655e+06	5.87476e+06	6.27412e+06	6.78851e+06	6.15406e+06	6.37254e+06	4.94021e+06	4.44803e+06	7.83052e+06	5.83515e+06	5.40594e+06	5.36579e+06	6.23707e+06	6.52083e+06	4.88529e+06	7.249e+06	1.06108e+07	4.38356e+06	6.93198e+06	4.31525e+06	6.07167e+06	5.51905e+06	4.32612e+06	7.49874e+06	5.13739e+06	2.34782e+06	6.24523e+06
2,4-diaminopentanoicacid@0.968-QP	2.28131e+08	1.43384e+08	1.32292e+08	4.1797e+07	2.08715e+08	231986513	1.81551e+08	1.67069e+08	4.20979e+07	1.92444e+08	2.98187e+08	1.87431e+08	2.54142e+08	1.42895e+08	1.95738e+08	1.55892e+08	3.18506e+08	1.52058e+08	1.09877e+08	2.17072e+08	1.15137e+08	1.1945e+08	2.78166e+08	2.26878e+08	1.4468e+08	3.25041e+08	3.08123e+08	2.11352e+08	8.02796e+07	1.10972e+08	1.8965e+08	1.88064e+08	1.18207e+08	1.70118e+08	1.29281e+08	146109323	1.11094e+08	1.78163e+08	2.03776e+08	1.2638e+08	1.5297e+08	97442995	1.44136e+08	124493912	1.40618e+08	2.0973e+08	1.67143e+08	1.11827e+08	2.14112e+08
133.01124@0.969-QP	2.15826e+07	1.5755e+07	1.33951e+07	1.24573e+07	1.96059e+07	1.41086e+07	1.94465e+07	1.6173e+07	9.44352e+06	2.18662e+07	1.41152e+07	2.10734e+07	1.92312e+07	1.83423e+07	1.76719e+07	1.57802e+07	1.66243e+07	1.30305e+07	1.14796e+07	1.67829e+07	7.74654e+06	8.8438e+06	1.57247e+07	1.90674e+07	1.35368e+07	14129479	2.61625e+07	1.87636e+07	1.08079e+07	1.67873e+07	1.8435e+07	1.2426e+07	8.05521e+06	1.32615e+07	1.1476e+07	1.58482e+07	1.92853e+07	2.19124e+07	1.56364e+07	2.33412e+07	1.68246e+07	8.58252e+06	1.82553e+07	1.2254e+07	1.71093e+07	1.53953e+07	1.63668e+07	1.34557e+07	1.76202e+07
133.03682@1.015-QP	4.26844e+06	4.36015e+06	4.60458e+06	2.48853e+06	4.63384e+06	2.17908e+06	4.10481e+06	4.83951e+06	7.10449e+06	1.14591e+07	6.56642e+06	2.99411e+06	2.11933e+06	2.83903e+06	2.4804e+06	2.6742e+06	2.89404e+06	3.45702e+06	2.91663e+06	3.02047e+06	4.18124e+06	3.87198e+06	2.80494e+06	3.48982e+06	2.77843e+06	2.59628e+06	3.5618e+06	1.53305e+06	2.71634e+06	4.22088e+06	3.54648e+06	2.79149e+06	2.20947e+06	1.4869e+06	1.53833e+06	1.63283e+06	2.54994e+06	1.32054e+07	1.49437e+06	4.20842e+06	1.99611e+06	5.16505e+06	2.04194e+06	1.0386e+06	1.19645e+06	1.56591e+06	2.59098e+06	3.98891e+06	1.66563e+06
4-hydroxyindole@9.306-QP	251621	432878	1.19215e+06	217110	349293	277391	590503	856809	23191.6	611727	984570	1.45084e+07	783849	675030	419129	529512	932468	786663	642064	684063	237178	290995	876364	644662	456492	316571	253334	636791	319687	468137	446651	664322	3.18688e+06	494157	900820	1.03216e+06	461851	445781	280718	166672	467172	244418	367326	428029	424362	573724	1.63886e+06	343450	2.11505e+06
4-hydroxyindole@4.628-QP	3.1085e+06	9.68934e+06	1.15115e+07	5.9678e+06	2.03492e+06	9.37963e+06	1.52134e+07	5.75033e+06	3.03582e+06	5.79507e+07	4.77274e+06	544365	2.33188e+07	1.79469e+07	1.31788e+07	1.44859e+07	7.80837e+06	9.26785e+06	1.1855e+07	5.17678e+06	6.03748e+06	3.64061e+06	9.99016e+06	1.54912e+07	6.0271e+06	9.75699e+06	6.25269e+06	1.10585e+07	6.45811e+06	1.22468e+07	1.90525e+07	7.16556e+06	1.63034e+07	7.38996e+06	1.60451e+07	1.14671e+07	1.47428e+07	4.78646e+07	1.4564e+07	7.0365e+06	1.79637e+07	3.39613e+06	1.20924e+07	7.21576e+06	3.93276e+06	6.40318e+06	4.09443e+06	1.89709e+07	1.86208e+07
4-hydroxyindole@10.416-QP	91660.7	114294	119894	97054	109432	101297	151231	104748	78179.6	92597.5	116394	141999	1.01867e+06	131565	81529.7	133575	138972	93625.2	30052	32566.6	93254	84319.2	124510	140763	82805.6	120212	34781.3	81332.2	128719	118958	130164	96000	3.69206e+06	118861	165521	136800	123147	108626	118849	134491	92827.6	78492.3	159542	93784.8	84926.3	31286	207248	113045	143060
133.99649@0.999-QP	1.07996e+07	1.34397e+07	1.40338e+07	1.73796e+07	1.41863e+07	1.47787e+07	1.3185e+07	1.59186e+07	1.44048e+06	1.05214e+07	9.40608e+06	1.46361e+07	1.76615e+07	1.83294e+07	9.676e+06	1.5272e+07	1.38951e+07	1.68562e+07	1.17037e+07	1.63739e+07	9.09994e+06	1.17289e+07	1.41854e+07	1.67444e+07	1.29825e+07	1.25751e+07	1.82466e+07	1.39447e+07	1.33599e+07	1.34298e+07	1.65482e+07	1.98867e+07	1.32709e+07	1.35285e+07	1.43762e+07	1.87158e+07	1.75047e+07	6.29936e+06	1.7795e+07	1.1846e+07	1.49256e+07	5.99885e+06	1.44205e+07	1.3797e+07	1.29261e+07	1.32695e+07	1.22754e+07	7.26991e+06	1.45026e+07
134.02081@1.146-QP	9.38895e+06	7.07152e+06	5.87374e+06	5.2342e+06	9.40877e+06	3.91666e+06	1.4235e+07	8.27721e+06	1.59744e+06	1.03554e+07	3.74891e+06	8.16455e+06	4.50181e+06	4.73012e+06	9.32287e+06	1.20648e+07	9.92243e+06	6.93969e+06	8.57142e+06	9.24354e+06	4.54056e+06	8.93534e+06	9.10488e+06	1.08327e+07	6.09729e+06	3.16626e+06	9.67173e+06	4.87716e+06	5.00975e+06	1.98165e+07	9.30546e+06	9.77208e+06	5.0591e+06	3.68179e+06	1.89304e+07	1.63095e+07	2.05603e+07	1.87113e+07	1.41796e+07	2.39455e+07	9.85801e+06	7.16798e+06	1.05297e+07	6.34021e+06	4.48382e+06	6.93254e+06	1.00707e+07	8.80992e+06	6.16342e+06
6-OXOPURINE@2.969-QP	1.30046e+06	440340	745082	527266	3.91343e+06	686389	939150	341886	93935.6	713562	342721	363651	827348	461639	668559	1.7005e+06	2.89201e+06	628545	365689	599700	349590	290039	495393	479899	539002	515776	2.01545e+06	4.31529e+06	1.85827e+06	275110	565464	302140	1.55969e+06	837433	427388	1.57561e+06	607158	509914	409747	464056	815355	1.02368e+06	655339	3.59169e+06	430150	1.86232e+06	2.49855e+06	5.5894e+08	559258
Guanine@2.489-QP	1.89516e+07	3.22895e+06	7.97497e+06	3.37955e+06	4.75961e+07	8.2186e+06	8.28984e+06	3.32537e+06	306173	5.43286e+06	1.69376e+06	533662	7.83831e+06	2.51255e+06	6.77057e+06	2.38262e+07	4.74084e+07	474284	1.24933e+06	357571	479621	1.19822e+06	922391	3.61055e+06	3.90068e+06	5.13871e+06	2.97515e+07	6.27807e+07	2.81824e+07	679531	4.61002e+06	4.81394e+06	2.11387e+07	1.4247e+07	4.87637e+06	2.60306e+07	4.54194e+06	844339	4.75367e+06	4.38464e+06	1.16314e+07	1.44045e+07	3.67143e+06	5.26819e+07	2.55038e+06	3.50982e+07	4.20692e+07	4.29902e+07	8.57304e+06
D-(-)-Fructose@1.332-QP	4.11705e+07	5.53526e+06	3.49334e+06	6.15093e+06	4.60098e+06	5.00127e+06	1.10541e+07	1.01006e+07	1.66189e+06	2.08813e+07	5.76531e+06	1.30478e+07	5.45666e+06	6.95399e+06	4.64903e+06	3.80276e+07	1.35026e+07	7.1647e+06	8.47315e+06	2.15872e+06	1.99146e+07	1.50541e+06	2.16734e+07	8.47688e+06	7.64856e+06	6.42499e+06	1.18831e+07	1.00171e+07	9.72719e+06	1.91373e+07	1.45805e+07	1.14327e+07	3.41432e+06	1.03649e+07	4.10958e+07	1.54061e+07	3.88673e+06	8.41828e+06	1.01067e+07	1.17942e+07	5.80617e+06	6.58301e+06	1.33274e+07	8.34018e+06	9.37412e+06	9.52771e+06	1.87711e+07	1.35068e+07	6.30065e+06
134.07237@10.536-QP	255273	3.95112e+06	116135	80563.9	4.98189e+06	2.04267e+06	599260	163773	29156.8	1.91279e+06	82761	48256.8	702620	2.77368e+06	286552	7.12907e+06	3.32418e+06	494141	123248	194276	394427	31172.1	1.27456e+06	306059	440345	297221	275617	138941	46538.5	1.89666e+06	72790.5	513428	709077	1.67249e+06	480746	202900	219886	384766	268610	34119.4	786889	92849.7	1.8667e+06	79378.4	171005	109632	2.03615e+06	1.12855e+06	708986
Chromane@10.82-QP	1.1514e+06	2.98235e+06	225491	2.90589e+06	70445.5	4.0286e+06	1.85733e+06	954708	32921.6	2.30903e+06	877688	2.16859e+06	5.00549e+06	2.46677e+06	799774	1.88352e+07	2.64705e+06	1.37964e+06	757347	3.77481e+06	1.61129e+06	995534	3.45282e+06	1.5996e+06	5.65766e+06	4.56843e+06	470578	6.33253e+06	140878	1.25688e+06	689553	1.70669e+06	4.5718e+06	1.27462e+06	1.42411e+08	1.76303e+07	1.44505e+07	140306	3.64407e+06	39427.6	408634	1.47419e+06	8.9358e+06	3.10781e+06	707258	1.70403e+06	1.97815e+07	5.41923e+06	1.435e+08
Chavicol@11.568-QP	9.22831e+06	3.7183e+06	129205	601717	778975	237088	118370	94580.1	660373	555220	565833	739616	520050	65617.5	136278	127795	4.06399e+06	476430	1.62978e+07	1.90738e+06	5.13821e+06	98413.8	123143	121854	162725	539731	42299.7	155190	2.72416e+06	1.15752e+06	144729	89872.4	2.44945e+06	531038	108794	141232	794343	1.36328e+06	212927	9.91329e+06	2.05412e+06	69079.6	1.22068e+07	945609	3.51396e+06	1.25275e+06	1.50995e+06	302225	76471.3
135.00634@2.311-QP	5.61615e+07	3.87826e+07	6.72819e+07	2.36132e+07	1218502430	6.7065e+07	7.3702e+07	6.50934e+07	9.55409e+06	1.04955e+08	6.29493e+07	4.46502e+07	2.9623e+07	5.03143e+07	4.10838e+07	4.64596e+08	4.59737e+08	5.34019e+07	6.993e+07	4.85998e+07	6.10532e+07	3.3926e+07	5.33415e+07	1.27418e+08	7.16534e+07	2.85911e+07	5.32882e+07	5.4058e+07	4.17242e+07	6.82558e+07	7.00538e+07	8.5814e+07	4.94568e+08	2.74021e+07	2.65631e+07	4.48205e+07	7.1294e+07	4.50515e+07	3.81496e+07	8.85518e+07	3.98323e+07	6.01128e+07	8.81133e+07	4.59995e+07	2.31185e+07	8.47946e+07	4.93924e+07	3.11947e+07	2.74424e+07
135.04045@0.995-QP	5.17733e+07	5.49218e+07	1.09122e+08	5.63447e+07	1.02727e+08	1.06863e+08	6.76646e+07	8.426e+07	1.78172e+07	1.15603e+08	5.33906e+07	1.25832e+08	8.10672e+07	1.0135e+08	9.85266e+07	1.01869e+08	5.72689e+07	4.86846e+07	45662978	4.85566e+07	4.14305e+07	4.45971e+07	4.14453e+07	6.55077e+07	3.85526e+07	4.85124e+07	7.46711e+07	6.30434e+07	6.38155e+07	1.13179e+08	6.36322e+07	3.13792e+07	1.02083e+08	4.7406e+07	4.20019e+07	9.87063e+07	9.1201e+07	1.62678e+08	1.06638e+08	6.41796e+07	4.08942e+07	3.29303e+07	9.9234e+07	5.2562e+07	4.05204e+07	4.9702e+07	5.63621e+07	8.59446e+07	6.86764e+07
135.06768@5.728-QP	43096.4	892418	548763	7.21962e+06	7.4519e+06	2.87171e+06	4.99529e+06	1.21017e+07	171009	1.40458e+06	934943	1.57778e+06	1.44178e+07	2.27709e+06	2.17819e+06	1.14696e+07	5.29182e+06	4.08318e+06	457436	805984	1.61673e+06	2.52324e+06	1.04475e+07	1.11932e+07	3.21681e+06	2.45097e+06	2.18146e+06	1.41805e+06	5.24914e+06	8.49856e+06	1.8427e+06	2.98306e+06	870203	2.49813e+06	8.57057e+06	5.32152e+06	1.8323e+06	4.3626e+06	2.03359e+07	2.30702e+06	3.77836e+06	1.34112e+06	1.53849e+06	2.76235e+06	4.63693e+06	4.51642e+06	6.74715e+06	5.07768e+06	2.74331e+06
2-phenylacetamide@6.226-QP	293435	3.1205e+06	270829	245294	279635	251416	285618	321183	182729	220812	284220	2.89045e+07	933629	328590	327492	316981	324735	303907	8.74432e+06	397520	195791	975247	286746	268548	204301	631932	313297	287676	298846	291461	3.36649e+07	292763	308703	263411	311112	275747	336549	474595	247225	262411	312850	260214	307864	230221	245819	278916	317398	214869	297661
N-Benzylformamide@1.412-QP	3.0515e+08	254637378	2.345e+08	2.50164e+08	3.62973e+08	2.48589e+08	1.75529e+08	290671549	4.4476e+07	2.88606e+08	2.19251e+08	2.04304e+08	1.96714e+08	1.7328e+08	4.04466e+08	2.30829e+08	3.03224e+08	3.15972e+08	1.83396e+08	3.09032e+08	1.28486e+08	1.33178e+08	2.51088e+08	3.0235e+08	1.70583e+08	306467585	3.81441e+08	2.35755e+08	1.52091e+08	2.0662e+08	3.0814e+08	2.70876e+08	1.45441e+08	1.8087e+08	2.58415e+08	2.93836e+08	2.35078e+08	2.16818e+08	1.90201e+08	1.6772e+08	2.07039e+08	1.98941e+08	2.04964e+08	2.24083e+08	2.14444e+08	2.05308e+08	3.04435e+08	179375347	1.40022e+08
135.90101@1.103-QP	5.16979e+06	3.83662e+06	7.48927e+06	1.42343e+07	1.25192e+07	1.43135e+07	1.35256e+07	1.55589e+07	1.5697e+07	1.62455e+07	1.71468e+07	1.68958e+07	1.85445e+07	1.59354e+07	1.39147e+07	1.60705e+07	1.66429e+07	1.76819e+07	1.53501e+07	1.44055e+07	2.05493e+07	22945975	1.53992e+07	1.60396e+07	1.88405e+07	1.76318e+07	1.82312e+07	1.83111e+07	1.89079e+07	1.54038e+07	2.19853e+07	2.79639e+07	1.57887e+07	1.93225e+07	1.68728e+07	1.77027e+07	1.71623e+07	1.82444e+07	2.04012e+07	1.53691e+07	1.53057e+07	2.06808e+07	2.0623e+07	2.2324e+07	1.81159e+07	1.92013e+07	2.11282e+07	1.4523e+07	2.01267e+07
L-Threonicacid@1.035-QP	5.36831e+07	6.0747e+07	3.58534e+07	1.63287e+07	6.3467e+07	5.55293e+07	4.6861e+07	5.24876e+07	1.21131e+07	1.33878e+08	3.63584e+07	5.03292e+07	4.76741e+07	8.28602e+07	6.13073e+07	6.11041e+07	6.88058e+07	2.84564e+07	5.52085e+07	4.38891e+07	5.02282e+07	4.85691e+07	7.75059e+07	5.31548e+07	3.84428e+07	8.66144e+07	1.04746e+08	1.02256e+08	4.0024e+07	7.00109e+07	4.15827e+07	4.59511e+07	3.04397e+07	2.95729e+07	5.60995e+07	3.15668e+07	7.76808e+07	5.87148e+07	5.69362e+07	4.65051e+07	6.89812e+07	3.03704e+07	7.58745e+07	5.72758e+07	6.59106e+07	2.82963e+07	1.51597e+08	6.57992e+07	6.5963e+07
L-Threonicacid@1.191-QP	2.50967e+07	2.57716e+07	6.71281e+06	5.29431e+06	3.73167e+07	1.84809e+07	2.27063e+07	3.45498e+07	322274	1.57033e+06	8.56001e+06	1.02715e+07	7.75634e+06	2.57876e+07	3.84843e+07	2.85247e+07	1.76621e+07	3.68478e+06	1.19196e+07	1.4665e+07	1.36657e+07	1.39418e+07	2.0497e+07	8.11406e+06	11021803	4.20978e+07	3.10022e+07	2.69213e+07	5.8635e+06	1.47035e+07	4.96053e+06	2.01309e+07	6.9832e+06	6.67413e+06	7.61315e+06	5.26924e+06	4.21398e+07	1.51828e+07	2.71827e+07	1.77386e+07	3.52937e+07	9.01887e+06	2.57422e+07	2.18517e+07	3.95861e+07	9.99473e+06	4.60704e+07	1.1112e+07	2.5167e+07
Hypoxanthine@2.207-QP	7.56324e+08	2.98528e+08	1060892396	3.61307e+08	7.85781e+08	6.94294e+08	8.50051e+08	3.37404e+08	1.07204e+08	4.72019e+08	3.67496e+08	4.27681e+08	3.95202e+08	4.27816e+08	4.51301e+08	2.98087e+08	5.59896e+08	3.30722e+08	7.31085e+08	2.80574e+08	2.40568e+08	3.0659e+08	5.96406e+08	7.87136e+08	7.35596e+08	3.89786e+08	8.02406e+08	8.59339e+08	6.34774e+08	3.19822e+08	8.31133e+08	4.5106e+08	4.56778e+08	3.76742e+08	261611606	5.54969e+08	5.58169e+08	2.96207e+08	3.83422e+08	1059771661	5.74242e+08	3477101649	1342324172	6.89403e+08	157041875	6.70116e+08	6.43611e+08	1.24648e+07	3.43344e+08
Hypoxanthine@2.722-QP	7.64934e+07	2.63143e+07	9.94475e+07	3.15806e+07	9.08037e+07	6.56353e+07	7.88607e+07	2.75116e+07	5.98206e+06	4.24984e+07	3.17035e+07	3.29345e+07	4.53024e+07	3.69172e+07	3.65568e+07	5.67479e+07	5.76358e+07	2.15092e+07	5.34015e+07	1.98175e+07	1.85702e+07	2.34932e+07	4.78921e+07	7.20269e+07	6.92984e+07	3.18749e+07	8.3701e+07	1.61799e+08	6.05127e+07	2.35787e+07	5.66368e+07	3.77194e+07	4.26082e+07	2.35126e+07	2.15933e+07	5.30893e+07	5.27157e+07	2.26527e+07	3.05922e+07	8.70489e+07	5.04264e+07	3.87048e+08	1.02545e+08	7.27163e+07	1.09928e+07	6.1126e+07	6.30586e+07	1.57581e+06	2.29226e+07
2-hydroxyacetophenone@1.41-QP	5.38291e+06	4.56596e+06	4.37777e+06	4.61575e+06	6.82803e+06	4.39598e+06	3.16761e+06	5.03172e+06	776372	5.14863e+06	3.8735e+06	3.12266e+06	3.96541e+06	3.06592e+06	7.86855e+06	3.98746e+06	5.34111e+06	5.71729e+06	3.26339e+06	6.02045e+06	2.49281e+06	2.30567e+06	4.33384e+06	5.5015e+06	2.70125e+06	5.27627e+06	6.75726e+06	4.41315e+06	2.66835e+06	3.37512e+06	5.80483e+06	4.27674e+06	2.83754e+06	3.13408e+06	4.79073e+06	5.44308e+06	4.40085e+06	4.5333e+06	3.82147e+06	2.85457e+06	4.13326e+06	3.71939e+06	3.73293e+06	4.14428e+06	3.80565e+06	3.51995e+06	4.96854e+06	3.35247e+06	2.76778e+06
2-hydroxyacetophenone@3.366-QP	126009	396419	144881	69949.6	201734	245059	121031	306191	152676	403429	141681	1.39658e+07	259166	195188	237107	296945	183128	719197	225707	644158	263384	168374	228280	186726	200154	246203	1.63993e+06	198219	47662	302617	226645	176237	161354	229254	208066	198980	56130.7	9.05413e+06	53486.7	121133	221381	90276.3	85742.6	46395.8	174402	495149	174195	67632.3	44860.6
1-methylnicotinamide@1.031-QP	1.30541e+07	3.3898e+06	5.01336e+06	1.58836e+06	1.08722e+07	3.85062e+06	8.36266e+06	6.14656e+06	3.11495e+06	2.06158e+06	1.82382e+06	2.75232e+06	6.29808e+06	2.78434e+06	1.37691e+07	4.05456e+06	2.15756e+06	4.12523e+06	7.3352e+06	3.51567e+06	6.61623e+06	2.6083e+06	6.27938e+06	3.76289e+06	2.92254e+06	5.51557e+06	2.00015e+06	973965	1.96529e+06	3.16066e+06	2.81461e+06	1.03502e+06	597217	3.78489e+06	3.06181e+06	2.96051e+06	2.86815e+07	2.01265e+06	5.59279e+06	4.48932e+06	2.42814e+06	475089	5.6963e+06	1.11197e+07	2.69975e+06	6.32499e+06	4.77976e+06	1.01653e+06	3.52868e+06
136.08806@2.976-QP	251146	272507	272235	326302	291908	311634	328057	211578	58132.5	280561	208840	225047	345330	285688	413742	278080	336124	388978	226309	371128	216346	147418	306577	296988	333564	319191	365424	308593	197310	170253	295984	143460	220741	284316	264491	257651	344690	248899	253574	208361	259801	209639	405560	304886	266201	329537	318396	300739	227074
MFCD00661062@2.077-QP	73238.1	83857.4	97079	66325.9	124989	76307.7	109229	82241.9	71774.1	136218	150197	121379	108272	127504	147000	130133	107507	100347	64523.5	119100	77699.3	80567.7	151833	61298.2	95777.3	92178.2	123518	116053	123038	107789	147198	122916	132701	141372	105401	103874	81157.2	185758	94182.8	191927	152140	526921	4.44451e+07	113410	113375	107256	200872	150808	191190
137.04478@1.044-QP	1.94909e+07	1.58018e+07	1.57451e+07	2.84681e+07	2.02173e+07	2.55476e+07	2.21201e+07	2.27986e+07	1.82317e+06	2.641e+07	3.03812e+07	2.30003e+07	2.84531e+07	2.06526e+07	1.75902e+07	2.09479e+07	4.78813e+07	1.73579e+07	8.58109e+06	2.85149e+07	8.5825e+06	9.27021e+06	2.88081e+07	2.57249e+07	1.52204e+07	2.79473e+07	5.75973e+07	2.69626e+07	9.79552e+06	1.24765e+07	2.68821e+07	2.40335e+07	1.53031e+07	1.97069e+07	1.36765e+07	1.92489e+07	1.40905e+07	2.19519e+07	2.34514e+07	1.93023e+07	1.84986e+07	1.16345e+07	2.35209e+07	1.49765e+07	1.97942e+07	2.62714e+07	1.83072e+07	1.43041e+07	2.67618e+07
2-pyridylaceticacid@11.331-QP	115013	78582.2	178758	236261	81697.7	197951	169825	251071	184305	224564	168490	208034	250743	182319	261811	87142.4	188751	35082.7	151523	273282	51325.1	183349	62897	46447.1	239434	32117.2	192932	43637.4	50330	268644	158041	248252	251398	180505	94576.1	160858	49136.4	304933	266952	55967.2	184438	178073	196530	32988.8	73342.9	126490	182150	133528	155996
Trigonelline@1.189-QP	9.85231e+07	1.25845e+07	6.9388e+06	8.28764e+07	4.69245e+07	8.12511e+07	1.32603e+07	4.97799e+07	1.30456e+07	1.08553e+08	9.07886e+06	1.87085e+07	2.14113e+07	1.15724e+07	1.43362e+07	1.31846e+08	1.07937e+07	7.63443e+07	4.32413e+06	2.51063e+06	7.56921e+07	1.53328e+06	4.3299e+07	1.10744e+08	9.50037e+06	6.56141e+07	4.02249e+07	3.6345e+06	9.31194e+07	4.95652e+07	1.06773e+07	5.4303e+06	1.10393e+08	2.10969e+07	6.88087e+07	3.94328e+07	3.62988e+06	1.17473e+07	1.1079e+07	2.74078e+06	8.88224e+07	2.88001e+06	8.93498e+06	5.58965e+06	6.3595e+06	4.28465e+07	1.9824e+08	1.9646e+07	5.55276e+06
Isoniazid@7.954-QP	2.40405e+07	1.68268e+06	190687	1.16224e+07	3.21799e+06	467585	2.48417e+06	8.95711e+06	1.31235e+06	7.76195e+06	4.84143e+06	2.5459e+06	3.4866e+06	3.00978e+06	8.30609e+06	1.78121e+06	5.50196e+06	1.75179e+07	1.78807e+06	285176	1.40943e+07	1.91011e+06	2.09737e+07	3.47972e+07	2.89488e+06	2.13706e+06	2.46108e+06	2.42148e+06	5.62673e+06	5.29988e+06	5.16463e+06	352300	322146	3.95556e+06	3.21139e+07	5.602e+06	702529	880982	1.40537e+06	132377	113747	577335	329321	412589	1.85125e+06	8.84739e+06	2.22723e+07	4.04801e+06	3.62379e+06
Isoniazid@6.431-QP	868164	1.10742e+07	1.05075e+06	914397	736617	2.79105e+06	54106.7	272550	28215.8	1.23354e+06	5.59713e+06	222853	5.25389e+06	978964	1.52e+06	255565	314301	2.49902e+06	1.78142e+06	430656	579689	614729	4.44725e+06	2.37561e+06	2.48679e+06	195826	185565	4.12146e+06	469444	137033	2.62528e+06	148615	65188.1	3.52472e+06	1.63825e+06	1.53849e+06	601141	3.65461e+06	1.17444e+06	55163.2	39530.3	3.85441e+06	2.65417e+06	204347	149289	2.37156e+06	1.07599e+06	1.71904e+06	2.57954e+06
Salicylicacid@7.689-QP	3.4386e+06	3.07268e+07	2.08421e+06	3.13932e+06	3.5591e+06	4.86779e+06	1.86588e+06	1.99077e+06	514426	2.4194e+06	4.96161e+06	1012717762	6.55894e+06	7.86404e+06	2.5757e+06	2.62521e+07	1.78547e+06	1.82221e+07	2.98653e+06	2.91807e+06	7.11152e+06	6.06606e+06	4.33536e+06	4.68669e+06	2.50115e+06	2.10868e+06	1.73558e+06	5.10866e+06	3.63739e+06	3.5639e+06	4.55074e+06	2.61274e+06	4.13446e+06	3.6619e+06	4.77974e+06	7.40268e+06	1.33953e+07	6.62127e+06	2.97326e+06	4.25308e+06	3.39787e+06	2.16206e+06	3.25289e+06	1.38785e+07	9.26275e+06	5.03147e+06	5.18353e+08	8.64373e+06	2.61476e+06
3-Amino-2-pyrazinecarboxylate@12.351-QP	127757	7.32201e+06	1.56826e+06	3.44423e+06	3.36251e+06	281231	656699	4.123e+06	32372.6	1.8262e+06	2.64169e+06	743211	1.98806e+06	982923	8.54746e+06	7.05004e+06	2.69938e+06	136165	1.4085e+06	608165	5.04913e+06	456845	6.16834e+06	2.4893e+06	1.35878e+06	826991	1.0092e+06	405689	972781	1.00226e+06	1.04371e+06	158473	2.60638e+06	1.36164e+06	846244	2.5309e+06	4.59992e+06	846524	1.96745e+06	3.13565e+06	1.76201e+06	366525	2.59866e+06	1.2415e+06	929337	684622	5.77796e+06	2.74944e+06	3.09657e+06
2-hydroxy-5-methylquinone@9.802-QP	126284	1.25295e+07	77963.3	57028.9	50806.7	46125.6	68691.1	51978.3	33816.4	41299.8	46519.9	67126	82587.3	69372.7	69314.2	98290.7	68832.6	35195.9	35118.7	37295	33126.3	39823.1	36203.4	40827.8	36276.4	77691.5	109193	49200.2	88122.8	39941.4	42304.3	69997.9	832030	66995.2	41751.2	70837.9	112852	36935.8	71354.4	101337	96530.8	61722.4	81883.4	64486.2	68441	47911.4	68818.8	34332.1	54489
3-ethylcatechol@9.123-QP	109443	1.26855e+08	38690.6	120557	424140	106864	149809	96388.7	124485	1.07508e+06	162794	3.58187e+06	417248	170165	203052	311518	186229	126375	179486	356031	248706	129640	222596	527284	242795	158954	345419	204145	40311.3	225614	262567	171672	126129	257118	107437	135657	276578	1.15363e+06	138335	399939	185697	138121	31825.5	182647	111971	229811	484060	224246	212725
3,6-nonadienal@10.89-QP	491976	357879	364192	1.25976e+06	512297	116662	1.17771e+06	615650	206557	188337	290129	429566	235564	554207	324325	315135	275157	252156	286619	296123	160158	293991	160171	317136	497932	195262	310054	447014	583221	271955	95669.8	270916	256199	308989	231341	335409	386176	452544	371220	509263	380951	218218	253482	226140	306879	249949	378428	229147	221014
N-Thionylaniline@3.362-QP	779971	229390	2.741e+07	127160	46914.3	42670.8	3.64133e+07	43272.3	7.36453e+06	513993	1.87877e+07	36417.5	42748.2	2.30484e+07	40849.1	38092	40667.3	1.12729e+06	485209	1.57153e+06	37355.8	1.89494e+06	37424.7	35373.4	36755.7	42146	5.04948e+06	35981.4	36855.8	36172.6	1.6937e+07	1.70011e+07	38182.4	38829	1.11603e+06	39682.7	43823.6	38907	1.5731e+06	4.29992e+07	2.54171e+07	7.00311e+06	35982.2	36223.2	77418.2	35778.9	35893.2	36080.7	32920
139.06049@1.081-QP	5.50568e+07	4.56908e+07	5.39571e+07	7.75837e+07	1.03008e+08	6.27464e+07	4.33924e+07	7.20737e+07	9.72404e+06	3.31617e+07	8.859e+07	4.62654e+07	5.84749e+07	3.75876e+07	8.9652e+07	5.66731e+07	7.00266e+07	3.58888e+07	4.56597e+07	7.03471e+07	3.90605e+07	4.10116e+07	4.61153e+07	5.73141e+07	3.34072e+07	7.1967e+07	61796705	5.1265e+07	3.07507e+07	30458186	4.68397e+07	6.2769e+07	8.58681e+07	5.27892e+07	8.60955e+07	6.81086e+07	5.06694e+07	7.76343e+07	6.39562e+07	1.01471e+08	4.79143e+07	5.14014e+07	5.80205e+07	5.20565e+07	6.2103e+07	6.11678e+07	6.68046e+07	5.24962e+07	3.34838e+07
139.06058@1.258-QP	1.09556e+07	9.292e+06	1.25667e+07	2.14098e+07	1.30347e+07	1.29245e+07	5.06363e+06	4.44079e+06	600263	5.95506e+06	1.80986e+07	8.80106e+06	7.11462e+06	6.88317e+06	9.84945e+06	6.61069e+06	7.02216e+06	5.17751e+06	6.16425e+06	1.61538e+07	6.22254e+06	3.86227e+06	6.84925e+06	9.40062e+06	5.75588e+06	1.96167e+06	7.07254e+06	9.72518e+06	5.18239e+06	2.26748e+06	6.98776e+06	1.46344e+07	1.28483e+07	9.94606e+06	1.71766e+07	8.52611e+06	8.4411e+06	5.35234e+06	9.28596e+06	1.29425e+07	1.22492e+07	8.34312e+06	7.9523e+06	7.24607e+06	7.10979e+06	8.0335e+06	8.90502e+06	6.91006e+06	3.99179e+06
1-indolizidinone@4.855-QP	48635.9	54239.4	83153.2	47164	45623.7	48147.4	94790.6	42530.3	53539.5	63891.5	66784.6	151530	48257.2	114831	41954.2	41848.8	44585.4	58147.8	69531.6	69796.9	40868.2	54216.4	56688.1	58525.8	56620.6	38625.2	42148.1	43172.7	44072.2	39635	4.04146e+06	56188.5	40792.5	1.80927e+07	105289	52837.1	40491	52202.9	53591.3	75160.8	86428.1	46467.6	86323	36373.5	40831.3	46849.8	42057	39659.3	42481.3
139.89566@1.002-QP	1.77969e+07	2.13514e+07	1.58178e+07	1.35366e+07	2.35789e+07	1.62435e+07	1.85561e+07	2.01054e+07	885541	1.42671e+07	1.5668e+07	1.71128e+07	1.68249e+07	1.6809e+07	1.67149e+07	1.91249e+07	1.04108e+07	1.26833e+07	1.02361e+07	1.44589e+07	9.55885e+06	7.77541e+06	1.21503e+07	1.3927e+07	1.36845e+07	8.07832e+06	2.02461e+07	1.383e+07	1.31045e+07	1.36288e+07	1.63343e+07	1.46602e+07	1.45557e+07	1.28533e+07	1.11358e+07	1.3697e+07	1.40544e+07	1.57249e+07	1.36755e+07	1.34548e+07	1.33203e+07	1.06405e+07	1.36509e+07	1.36007e+07	1.22139e+07	1.23787e+07	1.30026e+07	1.45973e+07	1.14629e+07
3-Azido-4-oxo-2-azetidinecarbaldehyde@1.668-QP	1.34798e+07	2.10163e+07	2.07333e+07	1.25511e+07	2.19697e+07	1.56623e+07	1.85434e+07	2.04904e+07	5.43691e+06	2.64225e+07	2.24682e+07	2.15285e+07	2.99991e+07	1.87142e+07	2.64047e+07	2.63653e+07	2.27361e+07	2.03535e+07	1.78221e+07	1.86009e+07	1.3216e+07	1.01387e+07	2.38188e+07	1.70587e+07	1.64638e+07	1.44314e+07	2.04918e+07	1.60654e+07	2.23868e+07	2.60873e+07	1.61143e+07	1.82785e+07	2.98381e+07	2.3047e+07	1.58255e+07	1.99688e+07	3.02458e+07	2.39778e+07	2.09182e+07	2.35465e+07	2.56046e+07	1.23242e+07	3.33794e+07	1.72642e+07	1.4995e+07	2.23286e+07	2.60415e+07	3.0338e+07	2.84673e+07
1-methylimidazoleaceticacid@1.085-QP	681111	2.94575e+06	5.56296e+06	1.21792e+06	1.80943e+06	1.51438e+06	4.61077e+06	1.46041e+06	748150	8.22809e+06	558620	2.50508e+06	8.96976e+06	3.44428e+06	2.94531e+06	1.13464e+07	1.71035e+06	1.40806e+06	2.76733e+06	1.50862e+06	2.67553e+06	1.37609e+06	3.21849e+06	1.27524e+06	2.19486e+06	1.50038e+06	1.86655e+06	2.00923e+06	3.19274e+06	2.45053e+06	4.0158e+06	2.09345e+06	4.91918e+06	2.83463e+06	964879	2.79246e+06	5.67488e+06	4.37465e+06	3.73999e+06	1.34785e+06	4.0586e+06	1.3149e+06	6.3114e+06	868957	2.72867e+06	1.68579e+06	5.4847e+06	2.21609e+06	1.26307e+06
140.96733@1.617-QP	189621	273989	256163	172920	267982	205615	229601	254199	96402.7	297915	269211	242138	330196	241448	299236	301730	269000	242016	224288	232754	169957	126237	267623	209952	191598	188845	251653	189904	269850	296408	195106	229011	324230	270809	218543	245858	327443	281655	267723	318744	287575	181672	367270	225101	195717	276030	334616	330411	346413
5-Nitroso-2,4(1H,3H)-pyrimidinedione@1.698-QP	1.06064e+07	1.32969e+07	1.34158e+07	8.82535e+06	1.08986e+07	9.70534e+06	9.21011e+06	9.6256e+06	4.49363e+06	1.11288e+07	9.75688e+06	9.19393e+06	1.10994e+07	8.05432e+06	9.16006e+06	9.57372e+06	8.34291e+06	7.97705e+06	6.78917e+06	7.21799e+06	5.54935e+06	4.63499e+06	8.05525e+06	5.9708e+06	6.30053e+06	6.59633e+06	5.9116e+06	5.90947e+06	7.72343e+06	8.48289e+06	6.20445e+06	7.24805e+06	9.28881e+06	7.48307e+06	5.73491e+06	6.86452e+06	8.83659e+06	6.85998e+06	6.44957e+06	7.73929e+06	8.04974e+06	4.45066e+06	8.91559e+06	5.76778e+06	4.90191e+06	7.44778e+06	6.97143e+06	8.37667e+06	9.10564e+06
141.03942@0.983-QP	3.18026e+07	2.30161e+07	1.85963e+07	3.34189e+07	2.9168e+07	3.4488e+07	2.04605e+07	2.9709e+07	5.34121e+06	3.73284e+07	1.85866e+07	2.2613e+07	3.99418e+07	2.23001e+07	1.75679e+07	1.90036e+07	30882220	3.4915e+07	1.86571e+07	3.18702e+07	2.02797e+07	1.75339e+07	2.99987e+07	3.21184e+07	1.99451e+07	3.65062e+07	3.26349e+07	3.53253e+07	1.85975e+07	2.20065e+07	4.31626e+07	2.57224e+07	1.34497e+07	2.79648e+07	1.92033e+07	2.59258e+07	2.50409e+07	2.96054e+07	3.74699e+07	1.38437e+07	2.46664e+07	1.47752e+07	2.37357e+07	2.49112e+07	2.73287e+07	35359714	2.22932e+07	9.46383e+06	2.78134e+07
Pyrrolo(2,1,5-cd)indolizine@2.955-QP	1.72888e+07	1.90331e+07	1.962e+07	2.34471e+07	2.19363e+07	2.41944e+07	2.35695e+07	1.57206e+07	1.78682e+06	2.1984e+07	1.59767e+07	1.6981e+07	2.9758e+07	2.20834e+07	3.34709e+07	2.18862e+07	2.65293e+07	3.37648e+07	1.59039e+07	3.04472e+07	1.51984e+07	1.03995e+07	2.57197e+07	2.51869e+07	2.51775e+07	2.75875e+07	3.08259e+07	2.45019e+07	1.5214e+07	1.29498e+07	2.36899e+07	9.49519e+06	1.54218e+07	2.2688e+07	1.93983e+07	2.06752e+07	2.87039e+07	1.93387e+07	1.95645e+07	1.56202e+07	1.93506e+07	1.61677e+07	3.34297e+07	23910962	2.13598e+07	27252602	2.5568e+07	1.95222e+07	1.64396e+07
Ethosuximide@2.572-QP	179800	157683	169299	173824	296496	239920	208564	181941	38709.5	243425	222171	2.13218e+07	207532	9.78788e+06	271246	299128	214876	228420	185054	33148.3	149010	131657	203102	190803	130013	162070	214462	197718	195285	186632	208418	180091	292460	161994	191687	181230	35119.5	237633	226614	242676	211652	189216	1.69749e+07	33184.8	161837	209533	247598	179922	219155
2,3-Difluorobenzaldehyde@0.874-QP	1101488319	1101264927	1123916817	1079417931	1138696911	1078791825	1198163036	1184108267	1241180410	9.56793e+08	1076406884	1097537435	1011666625	1071759461	1091777043	1080548727	1095423135	1128138608	1126506059	1097290638	1065881020	9.95609e+08	1112418383	1055153421	1195942568	1153219510	1203342329	1101752735	1087140214	1124803693	1137734296	1163850695	1112162279	1068911516	1181684769	1099295857	1165499218	1117974551	1139892146	1154806601	1155995876	1161964298	1056266452	1162254113	1085446768	1053345977	1194899623	1122643531	1138866931
142.02399@0.991-QP	3.16598e+07	3.03988e+07	3.53253e+07	2.72485e+07	5.46927e+07	2.74443e+07	3.32327e+07	4.07478e+07	2.49046e+06	3.1632e+07	3.68188e+07	3.49204e+07	2.77451e+07	3.12703e+07	4.08283e+07	3.32564e+07	1.21525e+07	2.45621e+07	1.48506e+07	2.07625e+07	9.62274e+06	1.24254e+07	2.64973e+07	2.76463e+07	1.83876e+07	1.30374e+07	2.4056e+07	22048935	2.44698e+07	2.82037e+07	2.00868e+07	2.87883e+07	2.04589e+07	1.847e+07	4.05016e+07	2.63381e+07	3.45218e+07	4.29246e+07	2.28958e+07	3.2245e+07	2.53534e+07	2.07428e+07	2.96252e+07	1.78629e+07	1.90091e+07	1.76011e+07	2.40666e+07	4.11423e+07	2.10789e+07
142.05387@4.364-QP	58566.2	65159.4	60631.8	50695	45520.2	51014.6	49790	44507.7	46970.1	53019.9	55959.4	39604.1	46112.3	57632.5	41215.6	41955.2	41604.5	43186.8	42561.1	37622.4	39452	41220	42383.2	39847.9	42409.5	39804.5	39509.9	41013.9	41300.2	39566.3	50988.5	41386.6	42762.7	41958	47134	43326.4	39603	53401.3	41744.1	50631.6	42643.8	41140.3	37088.8	37676	38709.3	40384.1	37755.2	39254.7	40821.1
Ectoine@1.405-QP	755762	1.04374e+06	3.14847e+06	1.33594e+06	8.15581e+06	1.20656e+06	4.18776e+06	5.01529e+06	1.36752e+06	1.71932e+07	1.51829e+07	640572	575624	1.48847e+06	1.69171e+06	980364	1.07422e+06	2.69589e+06	2.5055e+06	3.20177e+06	5.4319e+06	2.52843e+06	2.94872e+06	3.16417e+06	2.5288e+06	556468	1.78506e+06	1.00139e+06	232253	2.36083e+06	3.0524e+06	3.54569e+06	1.94274e+06	903842	2.56803e+06	1.63132e+06	1.0998e+06	3.48438e+07	897381	5.00786e+06	1.81887e+06	7.3584e+06	781601	738511	510404	3.53938e+06	928085	2.79666e+06	2.21626e+06
Ectoine@9.42-QP	77399.3	78795.7	77117.4	79937.2	81593	77772.3	76766.4	82602.1	82034.8	76928.1	86274.6	81015	113611	85740.2	81215.2	78133.7	76001.1	79761.5	83297.1	80081.1	73097.5	75646.7	75252.4	78954.5	77417.7	80085.7	72835.6	82032.5	77935	76951.1	79104.6	78236.4	1.49118e+08	708918	321500	78277.1	82074.4	88034.9	81275.1	77999.1	83033.1	72253.2	77106.7	77963.2	81924.5	76304.3	80031.1	47979.2	54375.5
Ectoine@9.921-QP	115146	152106	141996	103675	73132.2	105211	149789	133444	52025.6	58030.5	67418.5	154488	103326	120084	141392	107425	125564	94812.9	75371.9	90095.8	57393.5	79330.2	95729.2	83403.7	97947.9	81272.7	155052	102553	137729	110878	93306.1	97716.5	1001888211	1.32809e+06	499835	109022	146653	140918	107380	122963	97940.5	119691	107632	85773.9	78136.8	61164.7	82638.2	84657.8	61743.7
Ectoine@1.975-QP	757060	723399	318631	355480	2.0217e+06	857937	210506	244819	254369	1.15505e+06	1.08835e+06	3.26843e+06	1.49909e+06	366103	202604	1.10004e+06	300063	180167	2.51268e+06	231024	209138	223359	410852	298233	1.1753e+06	1.36029e+06	356903	462819	321635	504209	734079	239889	1125750824	1.93949e+06	741000	3.26107e+06	692126	945030	508903	598655	727600	632978	1.45161e+06	154441	906593	689697	378670	253399	619474
142.07495@9.431-QP	80662.9	82118.2	80369.1	83307.8	85033.4	81051.6	80003.4	86085	85493.8	80171.9	89912.4	84431.1	993426	89355.5	84639.7	81428.2	79205.8	83124.7	86809.4	83457.8	76179.8	78836.3	78425.4	82283.7	80682.1	83462.6	75906.7	85491.4	81221.2	80195.8	82440.1	81535.3	8.81165e+06	82995.8	88072.2	81577.7	83286.6	91747	84702.1	81288	86534.2	75299.8	80358	81250.5	85378.9	79521.8	83405.7	50002.2	56668.3
trimethadione@1.731-QP	1.11829e+06	1.65237e+06	2.09298e+06	435106	1.53618e+06	1.48078e+06	2.31881e+06	3.08369e+06	233232	6.52662e+06	2.1313e+06	1.36402e+06	2.10704e+06	711890	3.01031e+06	3.27429e+06	3.49154e+06	670264	392893	1.2946e+06	234298	1.17879e+06	1.07095e+06	1.5384e+06	1.67718e+06	688349	682345	1.43153e+06	1.21266e+06	3.81951e+06	1.0576e+06	1.53401e+06	1.48856e+06	1.44149e+06	932504	956161	776192	4.62449e+06	1.03022e+06	8.76934e+06	2.10727e+06	1.39143e+06	1.04049e+06	1.08774e+06	2.97325e+06	1.58672e+06	1.46924e+06	1.73138e+06	3.94065e+06
472437@1.036-QP	5.2916e+07	3.68687e+07	5.90324e+07	5.49555e+07	6.95979e+07	5.35699e+07	4.40302e+07	2.96923e+07	9.77186e+06	5.15753e+07	9.31817e+07	4.74222e+07	4.51461e+07	4.50934e+07	1.19698e+08	3.63459e+07	2.17472e+07	3.4537e+07	4.74668e+07	4.08297e+07	3.90999e+07	2.945e+07	4.10571e+07	5.82259e+07	3.78673e+07	4.04223e+07	2.86481e+07	5.08374e+07	4.14702e+07	5.42569e+07	2.36214e+07	6.39628e+07	3.74588e+07	4.17078e+07	4.25804e+07	4.54979e+07	3.54837e+07	9.86904e+07	4.14971e+07	4.83153e+07	4.54546e+07	3.50249e+07	2.48714e+07	4.1566e+07	4.78477e+07	3.76176e+07	4.04639e+07	1.00915e+08	4.47174e+07
143.07273@5.859-QP	788548	6.08342e+07	841457	1.34574e+07	9.03668e+06	1.74968e+07	8.38133e+06	8.96766e+06	57922.3	1.47728e+07	8.02106e+06	625972	5.65892e+06	1.72478e+07	1.87644e+06	5.28434e+06	8.32015e+06	496657	345814	1.7372e+07	1.69234e+06	483662	1.98326e+07	1.63082e+06	1.61832e+07	8.20884e+06	8.44271e+06	2.47896e+06	3.40498e+06	2.6112e+06	2.51137e+06	1.406e+07	1.29686e+07	444126	1.47213e+07	7.84216e+06	6.75777e+06	7.52587e+06	4.36506e+07	230539	2.0729e+06	191445	7.53552e+07	2.6348e+07	2.79486e+07	2.53821e+07	465538	252458	4.27047e+06
6-Methylquinoline@2.955-QP	1.70195e+08	1.86437e+08	186714982	2.23938e+08	2.15456e+08	2.39548e+08	232186683	1.56221e+08	1.84302e+07	2.24337e+08	1.55129e+08	1.71768e+08	2.85524e+08	2.14137e+08	3.2896e+08	2.08219e+08	2.56785e+08	3.15288e+08	1.61541e+08	3.00463e+08	1.50208e+08	1.04883e+08	2.53035e+08	2.48371e+08	2.49965e+08	2.65681e+08	3.09306e+08	2.4437e+08	154026252	1.30444e+08	2.32974e+08	9.43993e+07	1.54664e+08	2.21916e+08	191467342	203208171	2.86996e+08	1.86657e+08	1.89187e+08	1.60774e+08	1.98803e+08	1.59427e+08	3.33399e+08	2.4175e+08	2.16188e+08	2.6247e+08	257786935	1.92886e+08	1.65647e+08
DL-Stachydrine@1.19-QP	5.50092e+08	1.76742e+08	6.36125e+07	2.29479e+07	8.62775e+08	2.30645e+08	1633308930	2145926548	5.33613e+06	1093336328	152002375	7.2561e+07	3.02276e+08	1.89108e+08	1801505240	1712872932	1667907841	179425148	2.56832e+08	2.2515e+08	1.71657e+08	1003880478	1070119635	2.11414e+08	4.71794e+08	1.0981e+07	2.47108e+07	2.53545e+07	7.26959e+07	9.11196e+08	1.7362e+08	9.40115e+08	8.08952e+08	1.90596e+08	3.50634e+07	1.63271e+08	2.83653e+08	2540467230	4.67869e+08	3.43604e+08	3.86863e+08	1.0318e+08	4.12945e+08	1.11113e+08	1480194795	1.3782e+07	475192840	7.84769e+08	1455419338
144.03925@1.006-QP	1.24141e+06	2.20672e+06	1.60229e+06	824436	2.57445e+06	1.93722e+06	2.66208e+06	2.02069e+06	232267	4.80778e+06	2.13031e+06	4.34619e+06	2.85604e+06	5.9191e+06	1.6722e+06	2.68019e+06	1.35677e+06	2.25495e+06	485871	996504	689834	522737	1.33148e+06	930184	913492	573237	1.98489e+06	1.46953e+06	744096	3.26309e+06	1.94646e+06	1.34e+06	1.98393e+06	1.24483e+06	3.23934e+06	2.12461e+06	1.9786e+06	3.49807e+06	2.03016e+06	2.45676e+06	1.3242e+06	747952	1.85733e+06	617752	742358	692556	1.63769e+06	2.19471e+06	1.77031e+06
2-methyleneglutaricacid@1.057-QP	2.61528e+07	2.91899e+07	3.14773e+07	1.75842e+07	4.00719e+07	1.51074e+07	1.78381e+07	3.76821e+07	3.43848e+06	1.2174e+07	4.00587e+07	1.4702e+07	1.38178e+07	2.05356e+07	5.69601e+07	1.08708e+07	6.24058e+06	1.03791e+07	1.21584e+07	1.19404e+07	8.44302e+06	7.50575e+06	1.16488e+07	2.07276e+07	1.10393e+07	9.95675e+06	8.68026e+06	1.49386e+07	1.25795e+07	1.67449e+07	1.70404e+07	2.06945e+07	1.14634e+07	1.24144e+07	1.05455e+07	1.26124e+07	1.54698e+07	4.48877e+07	1.56565e+07	1.66224e+07	1.56391e+07	1.1725e+07	1.3453e+07	1.33586e+07	1.3747e+07	1.27283e+07	1.49373e+07	5.14235e+07	14869354
2-methyleneglutaricacid@1.195-QP	1.04959e+07	1.24846e+07	1.42075e+07	9.21651e+06	2.28479e+07	1.00558e+07	8.36843e+06	2.67015e+07	2.20375e+06	1.06574e+07	1.85295e+07	1.30727e+07	8.85359e+06	4.62412e+06	2.86107e+07	9.09368e+06	3.68745e+06	5.01959e+06	4.48686e+06	6.48268e+06	7.77189e+06	5.66945e+06	7.57657e+06	1.02578e+07	7.32588e+06	6.37015e+06	4.79274e+06	8.30826e+06	1.20498e+07	1.30579e+07	3.04424e+06	9.93243e+06	1.00564e+07	6.05588e+06	6.37406e+06	8.60179e+06	1.30931e+07	2.27981e+07	6.05958e+06	1.37301e+07	1.01417e+07	7.17639e+06	9.03821e+06	8.63931e+06	7.55829e+06	6.11273e+06	7.81928e+06	2.53864e+07	4.69208e+06
144.05656@10.245-QP	86538.8	73933.7	246766	49996.3	1.35282e+06	523701	68400.9	56236.4	35780.2	36566.1	145522	66187.6	60723.5	410787	54942.5	3.94347e+06	54788.8	496012	43697.2	44611.5	40719	41839.5	283506	43591.9	47000.1	45992.4	61168.7	448710	65978.9	1.0854e+06	53538.1	51583.2	239496	1.10285e+06	77678.4	43852.6	55210.6	46795.4	151561	56392.4	103625	53772.8	49329.7	389110	42923.4	86625.8	51224	57637.2	89755
1-naphthol@11.19-QP	75932.5	75139.8	63266.6	68357.2	128917110	139659	53012.8	53680.8	49740.3	58573.8	59573.4	48703.6	56367.6	56392.5	58916.4	75643.7	58674.4	2.79417e+07	52109.3	56266.1	164182	50803.1	59352.2	57486.1	54496.7	58892.5	52728.8	73388.7	59011.6	67589.1	57920.4	62776.9	761872	56831	94699.2	56141.6	59683.4	72536.8	58143	52921.3	58009.6	50877.9	62818.5	60356	58235.6	67231.3	64031.5	71831.6	63550
144.0761@2.954-QP	1.2106e+07	1.36224e+07	1.37227e+07	1.64099e+07	1.52675e+07	1.8268e+07	1.7936e+07	1.27545e+07	1.234e+06	1.73171e+07	1.15808e+07	1.25236e+07	2.22276e+07	1.64367e+07	2.53046e+07	1.53815e+07	1.99246e+07	2.56926e+07	1.26395e+07	2.33718e+07	1.13539e+07	7.58991e+06	1.86301e+07	1.91452e+07	1.90648e+07	2.03506e+07	2.30481e+07	1.92957e+07	1.16498e+07	9.88546e+06	1.75076e+07	7.12659e+06	1.14712e+07	1.80103e+07	1.42158e+07	1.54277e+07	2.1971e+07	1.42281e+07	1.46031e+07	1.19022e+07	1.49451e+07	1.24146e+07	2.51547e+07	1.8798e+07	1.63942e+07	2.02047e+07	2.02682e+07	1.461e+07	1.23742e+07
4-guanidinobutyrate@4.735-QP	168584	316474	1.4122e+06	650585	627338	258068	543333	932830	432666	2.6516e+06	334309	7.48995e+06	586729	831272	2.71383e+06	1.00497e+06	228712	724374	612472	575090	643487	342637	583249	838953	990928	375531	317666	551277	546916	1.31695e+06	834139	452253	1.12085e+06	738297	84380.5	1.03157e+06	679703	2.81941e+06	854611	1.07496e+06	650930	339555	296782	344186	973234	492017	1.24101e+06	1.14663e+06	5.02222e+06
4-guanidinobutyrate@2.69-QP	116672	86557.3	223973	107662	391368	288902	290783	225105	6.27087e+06	282023	298758	459771	271919	307733	821813	395567	360608	1.76477e+06	953121	5.58839e+06	343489	334389	29254.9	319946	363142	325511	325145	290075	285951	117991	100245	213016	283178	150945	210980	108463	386431	381425	111584	428052	54466.7	336007	394400	80893.3	314088	373111	262419	2.99522e+07	1.11054e+06
144.11408@10.132-QP	185623	171487	346025	139764	1.15394e+06	107845	1.38459e+06	843374	126382	1.39064e+06	462304	808433	753515	1.00592e+06	3.26405e+06	3.01368e+06	521048	5.30743e+06	2.0407e+06	2.303e+06	1.53598e+06	895415	1.46304e+06	1.42335e+06	805694	139032	215238	718682	2.14107e+07	3.42782e+06	568966	450983	497739	660380	454426	1.94243e+06	2.79954e+06	4.85722e+06	9.03033e+06	5.85713e+06	933124	413598	2.00197e+06	2.70736e+06	671439	962213	2.42468e+06	1.27586e+06	630035
Caprylicacid@12.745-QP	7.14399e+07	7.4667e+07	8.57872e+07	8.24251e+07	1.1444e+08	6.60526e+07	7.84219e+07	6.07584e+07	7.13444e+06	43786182	5.85701e+07	3.94748e+07	9.1736e+07	1.71433e+08	1.2536e+08	9.85614e+07	1.05485e+08	6.7379e+07	9.14081e+07	1.14988e+08	8.38904e+07	5.33347e+07	9.03815e+07	105928436	1.23184e+08	6.63557e+07	9.68323e+07	5.81896e+07	6.96271e+07	5.58563e+07	1.26271e+08	5.96459e+07	1.95319e+08	103164133	8.15456e+07	3.79003e+07	1.15608e+08	5.41125e+07	7.48711e+07	1.05322e+08	4.52818e+07	8.91938e+07	1.80147e+08	8.80899e+07	4.82399e+07	124262075	9.74781e+07	4.21743e+07	5.10514e+07
Caprylicacid@13.311-QP	2.54744e+07	1.40067e+07	1.32001e+07	4.22174e+07	1.79534e+07	1.44694e+07	1.38496e+07	1.2028e+07	3.02879e+06	1.07973e+07	1.22888e+07	2.18784e+07	2.16065e+07	2.55013e+07	1.66134e+07	1.66179e+07	1.46207e+07	1.89241e+07	1.80469e+07	2.44067e+07	1.64951e+07	1.17814e+07	2.10202e+07	1.56593e+07	2.62103e+07	1.33703e+07	1.25527e+07	1.11801e+07	2.97496e+07	1.79304e+07	1.59397e+07	1.04516e+07	2.35298e+07	1.92007e+07	4.321e+07	1.75223e+07	2.02752e+07	2.64755e+07	1.89585e+07	1.84223e+07	1.45222e+07	1.67879e+07	2.002e+07	1.2803e+07	3.4117e+07	2.00219e+07	2.57431e+07	1.32266e+07	8.39802e+06
4-Indolecarbaldehyde@9.337-QP	1.18435e+07	1.64201e+07	3.08661e+07	1.19333e+07	1.40798e+07	1.42549e+07	1.92806e+07	2.42781e+07	1.22136e+06	2.3413e+07	2.78287e+07	212124713	2.99608e+07	2.58092e+07	1.71819e+07	1.7432e+07	2.68714e+07	2.36121e+07	2.18743e+07	2.28063e+07	8.21563e+06	8.76397e+06	2.51484e+07	1.85525e+07	1.79177e+07	1.02351e+07	1.37737e+07	1.99834e+07	1.17581e+07	1.40305e+07	1.41393e+07	1.7526e+07	2.00025e+07	1.64987e+07	2.52471e+07	2.89273e+07	1.44578e+07	1.47899e+07	1.22066e+07	7.05738e+06	1.40102e+07	1.14209e+07	2.2356e+07	1.42393e+07	1.2911e+07	1.79429e+07	4.24392e+07	1.50483e+07	4.90996e+07
4-Indolecarbaldehyde@2.017-QP	4.36228e+07	2.65786e+07	2.12658e+07	2.82693e+07	3.18996e+07	1.88322e+07	1.99991e+07	1.12253e+07	1.0571e+07	5.44587e+07	3.5851e+07	2.95476e+07	3.75393e+07	4.36243e+07	2.90949e+07	2.88625e+07	2.61579e+07	2.66791e+07	2.18202e+07	2.90613e+07	3.16859e+07	1.39388e+07	2.70631e+07	2.40741e+07	1.25923e+07	2.91708e+07	2.80471e+07	2.12767e+07	2.33153e+07	1.01812e+07	4.61732e+07	6.95928e+07	2.98598e+07	4.11799e+07	1.52881e+07	3.03885e+07	3.12203e+07	4.32184e+07	2.54895e+07	4.43711e+07	2.59902e+07	4.0672e+07	2.66093e+07	2.5974e+07	1.28001e+07	2.4601e+07	2.6779e+07	2.96403e+07	1.96861e+07
8-hydroxyquinoline@2.955-QP	1.08438e+08	1.19689e+08	1.10493e+08	1.44754e+08	1.35284e+08	1.46766e+08	1.41057e+08	9.46714e+07	1.09762e+07	1.37998e+08	9.31445e+07	1.04545e+08	1.73213e+08	1.29737e+08	2.04607e+08	1.27099e+08	161410785	1.97303e+08	9.63396e+07	1.79889e+08	9.39484e+07	6.21003e+07	148457701	1.49406e+08	1.55717e+08	1.62966e+08	1.88298e+08	1.51098e+08	9.29986e+07	7.64102e+07	1.4569e+08	5.67379e+07	9.27632e+07	1.33234e+08	1.18002e+08	1.25327e+08	1.73563e+08	1.11356e+08	114232446	9.92401e+07	1.17066e+08	9.35539e+07	1.98471e+08	1.41489e+08	126820528	1.61882e+08	1.57631e+08	1.18881e+08	9.95915e+07
8-hydroxyquinoline@6.761-QP	132899	262652	1.51812e+07	218929	333493	120479	2.62547e+06	2.74837e+06	100489	400038	217679	5.00523e+06	6.51356e+06	803289	360087	8.29157e+06	2.82145e+06	222426	219177	129433	222601	737438	305481	681471	1.4725e+06	1.46276e+06	1.44084e+06	3.2723e+06	317232	3.78881e+06	52836.8	3.45534e+06	3.77881e+06	101860	419622	3.80592e+06	60419.8	1.51011e+06	5.42459e+06	9.59052e+06	1.58274e+07	228600	417101	377747	3.19929e+06	2.24415e+06	257231	271378	600062
8-hydroxyquinoline@5.837-QP	351896	9.28679e+06	435134	2.00008e+06	2.5561e+06	2.51297e+06	1.91803e+06	6.4885e+06	149256	2.00717e+06	1.1978e+06	79354.9	1.47902e+06	2.80305e+06	2.70895e+06	4.41058e+06	1.71203e+06	72716.4	331931	2.1693e+06	239558	296747	2.75459e+06	405301	2.35894e+06	1.61224e+06	1.13929e+06	553486	2.27373e+06	577950	307221	3.21959e+06	1.08413e+07	1.02974e+06	1.88003e+06	4.55979e+06	5.8946e+06	980012	2.20654e+07	6.88073e+06	2.20866e+06	1.94519e+06	1.00405e+07	4.66907e+06	5.56993e+06	5.70497e+06	356756	287963	3.60718e+06
145.06325@9.489-QP	82463.6	83951.3	82163.2	85167.5	86931.6	82861	81789.3	88006.7	87402.3	81961.5	91919.5	85744.6	1.45256e+06	91350.2	86529.1	83245.9	80973.9	84980.3	81485	85320.8	77880.3	75711	80176.1	84120.5	82483.2	85325.7	77601.2	87399.8	83034.3	81094.5	80838.9	83355.4	4.87598e+06	84848.5	90038.2	81894.3	85145.8	93795	86592.9	83102.5	88465.9	70380.5	79967.9	79702.6	87284.8	81296.9	84231.8	50633.1	54740.7
2-amino-5-oxohexanoicacid@2.198-QP	1.60142e+06	2.41545e+06	1.47767e+06	2.05806e+06	2.30897e+06	3.13548e+06	2.59936e+06	3.14825e+06	394531	1.05187e+07	1.82514e+06	4.11744e+06	3.6094e+06	2.26277e+06	2.99114e+06	3.84841e+06	1.77377e+06	2.5977e+06	2.05455e+06	1.2457e+06	1.6324e+06	1.07353e+06	2.64714e+06	2.36424e+06	1.76185e+06	2.18302e+06	2.08466e+06	1.25925e+06	1.79017e+06	3.22756e+06	2.55781e+06	1.17208e+06	2.78575e+06	1.97785e+06	1.51838e+06	2.72571e+06	3.64051e+06	4.57149e+06	2.88658e+06	5.87147e+06	2.43744e+06	1.42041e+06	2.36847e+06	1.59281e+06	1.22503e+06	1.63184e+06	2.135e+06	4.16651e+06	2.75832e+06
2-amino-5-oxohexanoicacid@1.559-QP	5.10218e+06	8.82072e+06	2.14052e+06	6.04313e+06	7.96968e+06	2.84527e+06	1.30104e+07	1.82628e+07	1.66101e+06	2.67552e+06	7.17038e+06	6.03013e+06	2.59568e+06	8.9318e+06	1.72678e+07	2.00459e+07	6.83295e+06	4.3112e+06	1.27022e+07	1.2906e+07	1.60039e+07	1.15129e+07	9.20063e+06	4.09803e+06	1.49382e+07	5.1856e+06	3.38031e+06	1.23641e+07	2.58557e+06	1.02106e+07	830353	3.12381e+06	1.00364e+07	4.81995e+06	586992	2.75452e+06	1.34857e+07	2.08083e+07	1.61157e+07	9.84477e+06	4.81173e+06	5.87612e+06	5.01051e+06	3.30559e+06	7.39138e+06	8.3484e+06	4.62377e+06	5.70942e+06	1.15521e+07
2-amino-5-oxohexanoicacid@1.033-QP	2.01784e+06	2.88382e+06	2.70409e+06	2.567e+06	3.59282e+06	3.71767e+06	1.70985e+06	1.46435e+06	510231	2.66868e+06	2.27589e+06	1.59791e+06	4.09691e+06	5.4812e+06	1.50296e+06	2.04135e+06	1.87016e+06	1.76454e+06	983859	2.13906e+06	1.35836e+06	706161	8.3485e+06	1.5762e+06	931221	1.92077e+06	2.2061e+06	1.70339e+06	1.54138e+06	2.35497e+06	1.33767e+06	1.80433e+06	2.16439e+06	1.24092e+06	1.67793e+06	1.85304e+06	2.11951e+06	2.23508e+06	2.35281e+06	1.44657e+06	5.50679e+06	841384	1.86352e+06	1.5049e+06	1.17532e+06	3.62736e+06	3.11514e+06	1.49953e+06	1.58619e+06
3-amino-4-methylhexanoicacid@1.058-QP	2.4407e+07	2.60401e+07	5.13186e+07	3.29107e+07	3.28234e+07	2.30434e+07	3.30127e+07	2.30255e+07	4.24599e+06	2.55197e+07	2.54335e+07	4.06066e+07	4.42639e+07	2.66173e+07	2.42466e+07	4.20369e+07	2.38423e+07	2.53632e+07	1.54633e+07	2.73257e+07	1.50288e+07	1.24476e+07	2.32453e+07	2.84106e+07	2.11374e+07	2.11591e+07	2.81133e+07	2.72096e+07	3.3141e+07	3.31645e+07	2.54651e+07	2.08826e+07	1.21619e+07	2.77981e+07	2.39871e+07	2.43296e+07	2.9041e+07	3.15542e+07	3.81753e+07	2.96492e+07	1.43944e+07	1.77367e+07	5.45148e+07	2.94429e+07	2.08375e+07	2.55065e+07	1.84774e+07	2.51292e+07	2.5143e+07
145.96822@10.789-QP	3.9205e+06	794443	3.30146e+06	2.54123e+06	7.35169e+06	1.76447e+07	935127	760198	231791	7.0788e+06	5.30786e+06	9.94338e+06	1.50028e+07	2.20557e+07	482894	529966	1.67677e+06	8.24521e+06	4.25663e+06	6.1164e+06	4.19291e+06	5.78918e+06	3.15478e+07	3.41348e+06	1.93917e+06	5.49723e+06	963941	891146	4.03855e+06	2.77994e+06	1.6239e+07	1.24371e+07	1.92781e+07	4.16431e+07	3.88333e+07	2.06414e+06	1.90954e+06	2.68136e+06	1.2103e+07	1.01551e+07	1.10007e+07	9.07697e+06	1.55323e+07	1.56092e+07	2.01076e+07	1.93267e+07	2.06154e+07	884781	686386
2-oxoglutaricacid@1.338-QP	1.00586e+08	1.64478e+08	7.18547e+07	9.99675e+07	2.55011e+08	1.03193e+08	181256417	1.73109e+08	1.23869e+07	9.15206e+07	5.19181e+07	2.22985e+08	7.04151e+07	1.51468e+08	1.99119e+08	250300825	3.45303e+08	1.57734e+08	1.70804e+08	2.09471e+08	9.80843e+07	1.80454e+08	1.02546e+08	2.95071e+08	2.15482e+08	1.05819e+08	1.82847e+08	2.36414e+08	1.42802e+08	5.90636e+08	1.82614e+08	1.09444e+08	1.01287e+08	1.29365e+08	2.15479e+08	2.84265e+08	4.71338e+08	2.4619e+08	4.94118e+08	9.78102e+07	9.655e+07	4.70125e+07	1.99698e+08	1.94165e+08	1.51031e+08	1.04557e+08	2.53192e+08	1.45541e+08	1.73891e+08
Coumarin@1.371-QP	170891	425863	285201	864943	609625	217402	576493	755829	396906	1.03083e+06	422592	523557	641844	202145	434349	1.67339e+06	179719	178476	365432	457263	957130	1.14529e+06	548578	311710	438070	334702	236780	342495	223307	3.44882e+06	3.46812e+06	751501	2.83228e+06	218218	226542	1.1903e+06	1.70814e+06	5.08105e+06	798652	2.35138e+06	197534	209944	1.42149e+06	366943	983633	249588	307473	1.23907e+06	496967
Adipicacid@3.677-QP	3.19759e+06	2.06043e+06	1.89132e+06	3.03825e+06	7.43824e+06	1.04961e+06	5.81934e+06	2.43051e+06	546102	1.39225e+06	1.55165e+06	1.50105e+06	793142	2.29575e+06	2.57651e+06	1.5717e+06	1.03874e+06	1.54239e+06	1.02005e+06	1.75368e+06	981504	2.34969e+06	2.03399e+06	3.18718e+06	2.72489e+06	838812	2.11903e+06	1.25021e+06	3.10612e+06	4.98033e+06	2.29068e+06	1.84458e+06	3.48104e+06	2.67938e+06	1.52559e+06	2.80693e+06	3.52062e+06	3.94781e+06	3.86648e+06	2.23241e+07	3.21998e+06	1.51549e+06	2.31116e+06	2.35059e+06	2.47414e+06	1.64387e+06	3.32933e+06	1.67291e+06	1.38459e+06
2,2-dimethylsuccinicacid@1.757-QP	1.43175e+06	1.56558e+06	740238	726887	3.07827e+06	966563	1.75631e+06	1.70555e+06	768571	1.24903e+06	857297	944031	717718	866395	1.14301e+06	2.26679e+06	1.0159e+06	1.00148e+06	463456	934333	1.00184e+06	546913	791877	813159	863864	1.2502e+06	1.27899e+06	522598	1.0757e+06	2.04479e+06	783873	1.08356e+06	1.58312e+06	1.14773e+06	1.41081e+06	1.91258e+06	1.22598e+06	1.43165e+06	1.53952e+06	1.24768e+07	1.0798e+06	703057	1.25559e+06	589989	715635	1.10518e+06	1.79537e+06	1.58795e+06	842551
D-(-)-Glutamine@1.241-QP	253420	212529	3.61284e+07	4.66524e+07	3.71019e+07	3.92237e+07	3.33672e+07	3.88129e+07	1.92394e+07	2.67617e+07	3.0181e+07	42496091	4.47242e+07	4.58732e+07	3.014e+07	3.97989e+07	4.34649e+07	5.03635e+07	3.09212e+07	4.7495e+07	2.91812e+07	4.02329e+07	4.31435e+07	4.56244e+07	3.64763e+07	4.50338e+07	4.41559e+07	4.21461e+07	3.89627e+07	3.91432e+07	4.28678e+07	5.74986e+07	3.53261e+07	3.95307e+07	4.93988e+07	5.26398e+07	4.83766e+07	1.98242e+07	5.76744e+07	3.45633e+07	3.27572e+07	1.83118e+07	4.12608e+07	4.19134e+07	3.92985e+07	3.95548e+07	4.06834e+07	1.55039e+07	3.80029e+07
146.06835@6.485-QP	556131	9.10801e+06	1.045e+07	7.60249e+06	1.55158e+06	2.41869e+06	1.1948e+07	1.07404e+07	647663	1.78546e+07	1.41142e+07	2.30785e+07	7.41249e+06	1.40819e+07	6.56729e+06	1.90926e+07	1.43299e+07	5.20626e+06	1.28592e+07	2.09858e+06	2.79155e+06	4.78183e+06	9.3418e+06	7.78145e+06	2.63831e+06	1.52753e+06	5.69381e+06	8.19312e+06	2.2268e+06	1.58408e+07	9.33821e+06	1.15339e+06	1.80798e+07	5.0354e+06	2.87652e+06	1.09972e+07	7.86421e+06	3.55128e+07	1.44175e+07	7.25339e+06	1.71599e+07	2.15834e+06	7.45681e+06	6.9885e+06	2.8628e+06	6.76802e+06	3.59139e+06	9.84538e+06	8.08192e+06
D-(-)-Glutamine@1.192-QP	1.21874e+08	1.3509e+08	1.32149e+08	1.64857e+08	1.30022e+08	137580541	1.20933e+08	1.31986e+08	5.55219e+07	100670075	1.08101e+08	1.2668e+08	1.40522e+08	1.48251e+08	109551129	1.27638e+08	1.22529e+08	1.54093e+08	1.07984e+08	1.45552e+08	9.30306e+07	1.20075e+08	1.2924e+08	1.37709e+08	1.10396e+08	141499617	1.46491e+08	1.38889e+08	1.30834e+08	1.37581e+08	1.30115e+08	1.85004e+08	1.15536e+08	1.19357e+08	1.58355e+08	1.49037e+08	1.64071e+08	9.14332e+07	1.92927e+08	1.1315e+08	1.01675e+08	6.6961e+07	1.23475e+08	1.20831e+08	1.15461e+08	1.15523e+08	1.29557e+08	6.83865e+07	1.22449e+08
DL-Glutamine@1.016-QP	2.68701e+08	2.90962e+08	2.8846e+08	3.60998e+08	273006833	3.0889e+08	257389897	2.52649e+08	2.03801e+08	2.46281e+08	2.51813e+08	3.5146e+08	3.79205e+08	3.54561e+08	2.36453e+08	2.96186e+08	3.17278e+08	3.62268e+08	2.78178e+08	3.34677e+08	2.85278e+08	3.20809e+08	2.913e+08	3.27547e+08	2.55825e+08	3.86925e+08	3.05073e+08	319399930	2.98169e+08	3.34117e+08	3.11672e+08	4.34988e+08	2.79599e+08	2.61022e+08	3.91054e+08	4.10347e+08	3.65155e+08	2.00928e+08	4.37042e+08	2.28337e+08	3.33524e+08	150306076	3.04917e+08	2.99264e+08	2.70215e+08	2.65168e+08	2.89104e+08	1.82958e+08	390472556
1-(1H-Pyrazol-5-yl)pyridinium@9.489-QP	80523	81975.8	80229.7	83163.3	84885.9	80911.1	79864.6	85935.7	85345.5	80032.8	89756.4	83726.9	2.16902e+06	89200.5	84492.9	81287	79068.4	82980.5	79567.5	83313	76047.6	73929.4	78289.4	82140.9	80542.2	83317.8	75775.1	85343.1	81080.3	79186.1	78936.6	81393.9	9.16185e+06	76444	81750.4	79967.1	83142.2	91587.8	84555.2	81147	86384.1	68724.3	78086.1	77827	85230.8	79383.8	82249.7	49441.6	53452.5
146.10451@0.884-QP	4.64143e+07	5.23078e+07	5.54522e+07	5.99896e+07	8.81327e+07	4.56817e+07	4.09231e+07	6.1817e+07	3.6091e+07	7.81168e+07	3.91439e+07	3.5284e+07	6.65293e+07	5.59575e+07	5.99716e+07	4.59798e+07	8.14439e+07	5.46099e+07	4.71139e+07	6.50985e+07	5.13321e+07	3.50652e+07	6.37962e+07	6.447e+07	3.73678e+07	9.06998e+07	6.4929e+07	4.72039e+07	3.93286e+07	4.88205e+07	55463330	6.06141e+07	4.92196e+07	4.98236e+07	3.26487e+07	5.74231e+07	6.04868e+07	3.61317e+07	5.80756e+07	4.67298e+07	6.63643e+07	3.48885e+07	5.85429e+07	6.99304e+07	7.26806e+07	6.98561e+07	7.02561e+07	3.86594e+07	5.51509e+07
3,5-diaminohexanoicacid@1.119-QP	1.67831e+07	1.71877e+07	1.87234e+07	1.9467e+07	2.67654e+06	1.44877e+07	1.43826e+07	2.12414e+07	142400	6.16282e+06	3.72624e+06	2.36701e+06	2.3772e+06	1.80672e+06	1.39377e+07	3.21687e+06	1.13156e+07	5.89317e+06	8.9556e+06	1.28811e+07	4.51158e+06	3.82482e+06	1.21795e+07	1.43735e+07	7.76165e+06	9.87976e+06	2.14673e+07	1.52656e+07	7.84115e+06	6.24475e+06	9.87748e+06	2.18102e+07	1.72307e+06	8.08468e+06	6.23581e+06	8.79143e+06	5.96105e+06	4.17201e+06	1.40375e+07	7.65596e+06	2.15742e+06	1.1426e+06	1.73787e+07	4.41035e+06	4.53713e+06	1.30836e+07	3.29792e+06	4.15035e+06	4.31375e+06
3,5-diaminohexanoicacid@0.863-QP	7.07474e+07	7.72692e+07	7.6705e+07	8.33751e+07	1.10116e+08	7.33507e+07	6.27881e+07	8.86297e+07	4.83727e+07	1.18558e+08	5.77981e+07	5.78009e+07	8.43382e+07	8.26055e+07	8.58766e+07	6.85945e+07	1.01045e+08	9.078e+07	6.41346e+07	9.97367e+07	7.49174e+07	5.61805e+07	8.52263e+07	9.03561e+07	5.62208e+07	106872131	9.76147e+07	6.13218e+07	5.57725e+07	6.86647e+07	6.78633e+07	8.94198e+07	6.13189e+07	6.37451e+07	4.0987e+07	7.31622e+07	7.32731e+07	4.29881e+07	8.40486e+07	64472233	7.66836e+07	4.55169e+07	7.65855e+07	8.76321e+07	8.69e+07	8.4959e+07	8.67285e+07	5.09294e+07	6.90039e+07
146.99602@1.005-QP	1.83634e+07	2.55238e+07	5.81832e+07	2.47858e+07	2.31257e+07	3.01401e+07	4.08818e+07	2.38556e+07	1.04935e+07	1.52492e+07	2.35514e+07	2.50153e+07	1.97139e+07	2.88792e+07	1.5914e+07	1.83361e+07	2.50902e+07	20858932	2.59114e+07	2.56869e+07	2.83562e+07	2.39727e+07	3.3383e+07	3.4158e+07	2.41367e+07	1.41561e+07	3.20216e+07	3.08056e+07	3.11164e+07	2.8403e+07	4.13507e+07	3.22725e+07	2.07341e+07	2.02763e+07	1.48482e+07	3.70296e+07	3.99234e+07	2.01276e+07	2.61429e+07	6.73147e+07	3.21055e+07	4.4824e+07	2.9319e+07	3.36669e+07	1.7344e+07	2.89902e+07	2.37577e+07	1.02601e+07	1.88789e+07
3-Thiomorpholinecarboxylicacid@1.227-QP	7.6747e+06	8.97392e+06	4.36819e+06	4.57527e+06	8.86108e+06	6.5631e+06	3.74369e+06	3.89336e+06	312643	2.08613e+06	2.5353e+06	1.32545e+06	7.56814e+06	7.7455e+06	7.27333e+06	6.07934e+06	5.77732e+06	5.74998e+06	4.12963e+06	6.90896e+06	4.00897e+06	2.75513e+06	4.76435e+06	4.90837e+06	5.14374e+06	6.41934e+06	6.48239e+06	6.73315e+06	7.33953e+06	4.41373e+06	5.5997e+06	3.56722e+06	3.31244e+06	6.51416e+06	5.55076e+06	6.62813e+06	1.15919e+07	1.4594e+06	1.17638e+07	3.93721e+06	5.90171e+06	3.56464e+06	2.53399e+06	8.92533e+06	7.05841e+06	9.89921e+06	3.31618e+06	4.21882e+06	1.00681e+07
L-Pyroglutamicacid@1.023-QP	9.08376e+07	1.12246e+08	9.2975e+07	1.02932e+08	1.11091e+08	9.6119e+07	8.9459e+07	8.21548e+07	8.84166e+07	1.75969e+08	1.54876e+08	8.59479e+07	1.0929e+08	9.40048e+07	8.91014e+07	6.98967e+07	8.79273e+07	1.21172e+08	1.10462e+08	1.14126e+08	1.25552e+08	1.27213e+08	9.41383e+07	1.03675e+08	8.53283e+07	1.59168e+08	7.74664e+07	1.12752e+08	8.74925e+07	114645404	1.07654e+08	1.19546e+08	8.15346e+07	8.72902e+07	1.38539e+08	1.11035e+08	1.00789e+08	2.42118e+08	122315688	1.03387e+08	8.81045e+07	78305702	7.68955e+07	7.71725e+07	8.64649e+07	86792301	8.31561e+07	9.06389e+07	1.18545e+08
L-Pyroglutamicacid@1.197-QP	6.12673e+07	7.92318e+07	7.73543e+07	7.38501e+07	8.73741e+07	6.95603e+07	7.13637e+07	7.08466e+07	3.41612e+07	1.18208e+08	9.86079e+07	6.5531e+07	7.27695e+07	7.01026e+07	6.49575e+07	5.86559e+07	5.70042e+07	8.18512e+07	5.89664e+07	7.41266e+07	5.19079e+07	5.67688e+07	7.01885e+07	7.32969e+07	5.35211e+07	7.72778e+07	6.75565e+07	6.62076e+07	5.81947e+07	8.01498e+07	6.84235e+07	8.08291e+07	6.25691e+07	6.0502e+07	7.14123e+07	6.76206e+07	7.22878e+07	1.61543e+08	8.11889e+07	8.39346e+07	5.73203e+07	5.36858e+07	6.17211e+07	4.88303e+07	5.0995e+07	5.7302e+07	5.38961e+07	6.72843e+07	6.57806e+07
1-(1H-Benzimidazol-2-yl)methanamine@9.489-QP	81495.4	82965.6	81198.5	84167.5	85910.9	81888.1	80829	86973.4	86376.1	80999.2	90840.3	84737.9	1.33821e+06	90277.6	85513.2	82268.5	80023.1	83982.5	80528.3	84319	76965.9	74822.1	79234.8	83132.8	81514.7	84323.9	76690.1	86373.7	82059.4	80142.3	79889.8	82376.8	4.85143e+06	77367	82737.5	80932.8	84146.1	92693.8	85576.2	82126.8	87427.3	69554.1	79029	78766.8	86260	80342.4	83242.8	50038.6	54098
147.96522@10.792-QP	1.50523e+06	344262	1.16755e+06	910252	2.74842e+06	6.18322e+06	357798	290731	86567.2	2.60818e+06	1.81556e+06	3.58519e+06	5.25629e+06	7.94295e+06	194388	188604	589835	2.95991e+06	1.49482e+06	2.19206e+06	1.57224e+06	2.12063e+06	1.14142e+07	1.1629e+06	742363	1.98823e+06	396626	306224	1.48279e+06	983541	5.7429e+06	4.44933e+06	6.95735e+06	1.49857e+07	1.43948e+07	719546	738478	985375	4.35573e+06	3.61862e+06	3.95103e+06	3.00488e+06	5.60084e+06	5.60858e+06	7.15192e+06	1.05001e+07	7.27053e+06	331703	298381
1-Chloro-2,3-difluorobenzene@1.195-QP	4.29403e+07	4.14407e+07	6.25962e+07	4.88987e+07	4.09992e+07	4.88879e+07	5.61818e+07	4.09486e+07	1.59663e+07	3.18816e+07	4.37621e+07	3.50577e+07	3.4941e+07	5.28807e+07	4.38298e+07	4.08444e+07	3.53752e+07	3.90697e+07	3.13078e+07	4.33436e+07	2.84361e+07	2.91079e+07	4.43341e+07	4.32141e+07	4.48418e+07	2.9315e+07	5.20533e+07	4.50972e+07	4.78949e+07	5.32305e+07	4.97738e+07	5.53655e+07	4.5967e+07	4.50783e+07	5.31514e+07	4.90316e+07	6.15772e+07	3.89289e+07	5.01243e+07	6.74097e+07	6.14414e+07	7.64339e+07	7.06249e+07	4.12049e+07	4.32459e+07	4.60405e+07	4.11102e+07	5.16461e+07	4.39573e+07
2-dehydro-3-deoxyarabinonicacid@1.383-QP	1.56706e+07	8.8456e+06	8.91182e+06	6.56425e+06	9.81143e+06	1.26626e+07	1.9206e+07	5.36953e+06	2.53591e+06	1.8737e+07	1.14899e+07	1.5006e+07	8.15314e+06	1.00643e+07	1.33853e+07	1.39704e+07	1.15456e+07	1.01395e+07	7.61017e+06	9.76731e+06	7.18716e+06	6.52096e+06	1.13747e+07	1.56174e+07	7.58562e+06	6.28082e+06	1.65079e+07	1.0018e+07	8.74975e+06	4.18345e+07	7.99895e+06	1.48125e+07	1.35046e+07	1.04405e+07	4.20129e+07	1.43538e+07	1.39139e+07	1.28942e+07	9.63655e+06	2.78593e+07	1.03352e+07	1.14914e+07	2.09283e+07	6.43431e+06	7.15509e+06	8.82995e+06	4.39775e+07	1.95292e+07	8.25781e+06
Xylonolactone@1.388-QP	1.55974e+07	8.78972e+06	8.01006e+06	5.54232e+06	7.27663e+06	1.03084e+07	1.74648e+07	4.79724e+06	1.94319e+06	1.60695e+07	1.03985e+07	1.20882e+07	7.17808e+06	8.31562e+06	1.11977e+07	9.78831e+06	8.33559e+06	5.45737e+06	5.83804e+06	7.48364e+06	5.35771e+06	4.87535e+06	8.66767e+06	1.37678e+07	4.94662e+06	4.85402e+06	1.50425e+07	8.86637e+06	7.22957e+06	3.76471e+07	5.93682e+06	1.24172e+07	9.89622e+06	7.95599e+06	3.34923e+07	7.94049e+06	1.104e+07	8.79263e+06	6.90202e+06	2.3222e+07	9.61976e+06	1.00293e+07	1.81501e+07	4.46015e+06	5.29585e+06	6.5665e+06	3.9934e+07	1.54377e+07	5.68307e+06
3-hydroxy-1-indanone@1.827-QP	2105132644	1830755874	2008957153	1743676712	2963250675	1606727753	2070237370	2808781182	5.55154e+08	4494220007	3092457657	2155748139	1630415587	1797797504	2078261031	1717031460	1695140551	2158260555	1557778312	2133680527	1816881248	1278514293	1892898149	2424054400	1933135622	1352649619	2584412698	1312174659	1260728016	2177952508	2823006231	2950019722	1681011649	1422790841	1205221054	1736202963	1804509869	4564194774	1392944665	2044538584	1815313494	2038759239	1740957352	1523280802	1314781860	1981368629	1504227730	2946690787	1186197025
149.00587@0.994-QP	2.39081e+08	2.46885e+08	2.65016e+08	3.17591e+08	2.45997e+08	2.5684e+08	2.27585e+08	2.66143e+08	5.90059e+07	195091970	1.87308e+08	2.72244e+08	2.83663e+08	3.11944e+08	1.97084e+08	2.8318e+08	2.39101e+08	2.9393e+08	2.03829e+08	2.71586e+08	1.66788e+08	2.25034e+08	2.65532e+08	2.86405e+08	2.14611e+08	2.42607e+08	2.98111e+08	2.41809e+08	2.43994e+08	2.65997e+08	2.81104e+08	3.84932e+08	2.39427e+08	228969929	2.77397e+08	3.37412e+08	335376502	1.4087e+08	3.44019e+08	2.12332e+08	2.48989e+08	1.28896e+08	2.68312e+08	2.41366e+08	2.19109e+08	2.31054e+08	2.34849e+08	1.34269e+08	260500567
L-(-)-Methionine@1.18-QP	3.84684e+07	2.83688e+07	3.13195e+07	3.97488e+07	4.09498e+07	2.84316e+07	2.97233e+07	3.50392e+07	8.93269e+06	6.09919e+07	2.40851e+07	2.15258e+07	3.16374e+07	2.45905e+07	3.58895e+07	2.46071e+07	4.54934e+07	3.54872e+07	1.91493e+07	3.80109e+07	1.89854e+07	1.72913e+07	3.04913e+07	3.02987e+07	2.56925e+07	3.58729e+07	4.74645e+07	2.58972e+07	1.37981e+07	3.19055e+07	30519185	4.21257e+07	1.18211e+07	2.07736e+07	2.73667e+07	2.77608e+07	3.27064e+07	2.33282e+07	3.97348e+07	3.29263e+07	3.23207e+07	2.20541e+07	4.11558e+07	2.95438e+07	3.45107e+07	2.96205e+07	2.35611e+07	2.1191e+07	2.74304e+07
2-carboxybenzaldehyde@2.722-QP	119658	218327	41611.2	42500.8	207780	394435	93549.7	65175.3	94558.3	252976	546402	119200	218521	220333	265208	202344	113655	193324	115369	184796	199691	162177	158484	245375	121155	147343	267947	44696.9	37156.7	127871	156311	39173.8	5.97554e+07	144118	193003	122114	131128	596940	135926	174091	165434	75096	227693	163435	101855	79048.5	192248	434696	226781
2-carboxybenzaldehyde@5.985-QP	376720	1.57417e+06	198704	397979	312515	477908	255768	614213	28447.4	3.65718e+06	1.73876e+06	5.67303e+06	865119	150520	481913	483221	251809	944099	214863	1.75726e+06	693788	37213.3	455280	600116	316525	124169	4.38756e+06	173522	160598	185263	217856	28830.2	70265.8	884459	68882.7	709637	76980.7	7.00858e+06	86464.4	30188.7	328543	170011	68833.4	83646.5	308110	2.08671e+06	1.06414e+06	250721	558410
150.04001@1.002-QP	1.66165e+07	1.96516e+07	2.43512e+07	2.21175e+07	1.83325e+07	2.27711e+07	1.99417e+07	1.96187e+07	6.56402e+06	2.95826e+07	1.4924e+07	3.53039e+07	4.2502e+07	2.97219e+07	1.66177e+07	3.71717e+07	2.45856e+07	2.27627e+07	1.79198e+07	2.3362e+07	1.42994e+07	1.75977e+07	2.55548e+07	2.05883e+07	1.64956e+07	2.34614e+07	2.83206e+07	1.87387e+07	2.20854e+07	2.75205e+07	2.3133e+07	3.19084e+07	2.62273e+07	1.83902e+07	2.1795e+07	3.37275e+07	2.62689e+07	1.78773e+07	3.12581e+07	2.01348e+07	3.49984e+07	9.5001e+06	3.41698e+07	2.14143e+07	1.77008e+07	1.56731e+07	2.12894e+07	1.32579e+07	2.91754e+07
150.05193@1.059-QP	2.00072e+07	4.59588e+06	4.6374e+06	5.458e+06	8.06529e+06	3.67433e+06	9.82373e+06	1.28641e+07	1.29703e+06	4.59809e+07	1.58883e+07	1.59233e+07	1.45128e+07	1.28276e+07	6.48645e+06	2.55337e+07	1.03128e+07	6.06886e+06	5.33095e+06	3.96039e+06	1.26402e+07	4.53257e+06	1.67393e+07	6.65626e+06	3.94031e+06	8.52548e+06	1.25865e+07	4.90074e+06	8.58405e+06	1.69649e+07	1.08032e+07	4.46509e+06	5.59793e+06	9.64313e+06	1.31123e+07	1.41183e+07	4.81393e+06	1.68969e+07	8.84318e+06	6.68957e+06	9.83416e+06	2.70052e+06	5.4144e+06	3.44395e+06	5.10891e+06	1.03301e+07	1.50682e+07	1.59675e+07	8.5627e+06
1-methylhypoxanthine@4.005-QP	2.84507e+06	3.17093e+06	3.99838e+06	2.31782e+06	5.02806e+06	2.14756e+06	5.09531e+06	4.12593e+06	764211	2.2617e+07	3.78217e+06	5.24649e+06	5.09769e+06	3.55061e+06	4.5638e+06	6.70641e+06	2.11111e+06	2.41463e+06	2.78163e+06	2.13617e+06	2.39014e+06	1.96115e+06	2.65828e+06	2.96687e+06	3.37457e+06	2.15067e+06	3.38767e+06	2.37875e+06	3.19055e+06	5.4196e+06	4.75596e+06	2.57739e+06	5.05271e+06	2.71363e+06	1.57399e+06	4.10836e+06	4.90623e+06	9.19732e+06	3.3101e+06	8.8857e+06	4.28979e+06	3.30585e+06	2.85854e+06	2.12906e+06	1.65025e+06	2.18189e+06	2.76275e+06	1.05354e+07	2.83527e+06
Hydrocinnamicacid@10.293-QP	424906	1.05051e+06	4.24755e+06	1.56942e+07	2.62653e+06	4.96807e+06	3.30186e+06	2.48195e+06	113662	178281	196613	321474	1.1866e+07	4.46379e+06	1.9285e+06	1.35038e+07	1.0955e+07	499830	583867	2.88026e+06	3.80822e+06	2.71376e+06	3.00036e+07	8.67971e+06	1.01972e+07	3.70176e+06	3.62434e+06	4.12692e+06	1.91631e+06	8.05745e+06	2.50081e+06	3.74131e+06	720110	6.89062e+06	1.05753e+08	1.65755e+06	4.33951e+06	3.50062e+06	7.83998e+06	1.77568e+06	4.03384e+06	1.72041e+06	6.12386e+06	6.8142e+06	2.45625e+07	8.80599e+06	7.93251e+06	467859	3.08886e+06
3-methoxyacetophenone@11.248-QP	140521	388088	104366	72258.2	191645	185455	109845	149965	71086.2	699624	109096	213406	80126.1	69480.8	123974	279410	4.95737e+06	193246	74770.9	140091	5.49811e+07	143109	300803	127307	85057.9	176112	120099	143186	61768.9	143163	330016	341584	255659	191049	1.79224e+07	154747	140364	40257.2	134398	180646	83214.7	165333	184173	35628.5	88575	259501	200162	54104.4	164808
150.10321@12.35-QP	1.00478e+08	4.81756e+08	8.78032e+07	1.7954e+08	2.02444e+08	1.01316e+07	3.69365e+07	2.51353e+08	488692	95257509	1.33915e+08	3.77825e+07	1.06434e+08	5.16209e+07	4.89705e+08	4.07628e+08	154044935	5.21892e+06	7.29146e+07	3.48088e+07	2.91619e+08	2.34502e+07	376623053	1.43537e+08	7.90596e+07	4.36821e+07	5.49977e+07	2.35652e+07	6.02749e+07	5.86431e+07	5.6258e+07	8.93504e+06	1.50099e+08	7.03384e+07	4.82523e+07	1.49167e+08	2.69086e+08	4.19548e+07	1.12231e+08	1.67527e+08	1.05736e+08	1.98599e+07	1.65461e+08	7.2732e+07	4.83317e+07	3.59092e+07	3.47704e+08	1.68526e+08	1.6983e+08
150.10351@12.011-QP	54556.6	1.83898e+06	56826.1	58277.8	267889	210936	48462.9	398544	37376.2	354976	413003	97437.7	160517	45312.2	561877	6.02512e+06	232464	45167.1	59202.2	945451	1.16964e+06	2.85116e+06	446735	108555	3.99866e+06	150666	43687.9	1.37905e+06	56403	842160	97995.3	46301.7	115172	129857	112362	251590	1.73508e+06	58473.3	47248.6	94340.6	9.27509e+06	55760.6	1.5582e+06	455212	136923	58592.2	197298	89396.7	524680
Carvacrol@12.351-QP	1.01136e+08	4.83033e+08	8.79655e+07	1.79942e+08	2.02463e+08	1.00778e+07	3.69365e+07	2.51555e+08	1.17657e+06	95257509	1.33969e+08	3.77926e+07	1.0645e+08	5.16271e+07	4.89823e+08	4.07739e+08	154044935	5.45874e+06	7.29146e+07	3.47827e+07	2.91807e+08	2.34502e+07	3.76592e+08	1.43539e+08	7.90912e+07	4.36821e+07	5.49977e+07	2.35652e+07	6.02749e+07	5.87805e+07	5.6258e+07	9.03966e+06	1.50017e+08	7.03384e+07	4.82523e+07	1.49167e+08	2.69146e+08	4.19548e+07	1.12231e+08	1.67527e+08	1.05849e+08	1.98825e+07	1.65461e+08	7.2732e+07	4.83317e+07	3.59092e+07	3.47458e+08	1.68473e+08	1.70185e+08
150.13644@1.017-QP	244012	2.36341e+06	880523	207387	2.71442e+06	1.75731e+06	426442	713940	162179	1.88579e+08	252590	2.80178e+07	2.32782e+06	4.66507e+07	1.56612e+07	7.03963e+06	1.03097e+06	190193	1.53243e+06	193778	3.77448e+06	174303	7.73893e+06	1.54969e+06	743970	636816	617147	1.78784e+06	2.84742e+06	4.99718e+06	2.09492e+06	5.61644e+07	4.2091e+06	5.71141e+06	243747	920870	719785	8.96735e+06	214160	229481	7.4423e+07	202115	615519	519250	265050	2.91784e+06	1.62474e+06	838572	9.10465e+06
151.00115@1.669-QP	2284147138	3372763741	3637738586	2038601293	3542175338	2594488253	2872739602	3247106372	8.49966e+08	3958773415	3493273258	3185014312	4462860479	2925041277	4074475000	4042734922	3428659813	3016226191	2588442437	2740000418	1941047604	1439504489	3373209767	2563708337	2516299370	2169998751	3128073113	2460271922	3294330315	3893155007	2417176563	2698966198	4281585036	3395230950	2494901172	2915897192	4265967247	3536873288	3189069058	3306054371	3625440962	1832549832	4832263901	2536799087	2185829070	3243005287	3627304993	4391681812	4251410001
1,2-Benzisothiazolin-3-one@21.19-QP	3.61712e+07	6.08097e+07	6.37506e+07	3.9687e+07	1.01479e+08	4.42299e+07	1.66189e+08	7.5106e+07	6.88492e+06	4.90165e+07	5.57506e+07	6.71258e+07	6.16675e+07	1.24207e+08	9.54069e+07	9.26189e+07	4.98759e+07	8.12441e+07	6.33518e+07	9.30018e+07	7.14924e+07	6.35917e+07	1.22489e+08	8.97572e+07	8.21006e+07	5.46382e+07	5.07626e+07	6.0602e+07	4.74918e+07	3.45666e+07	7.41141e+07	4.74717e+07	116885065	5.51231e+07	6.56973e+07	69508986	1.38794e+08	6.0179e+07	5.95791e+07	1.60191e+08	5.52385e+07	6.73485e+07	1.68968e+08	5.65838e+07	3.89271e+07	1.1221e+08	7.43082e+07	4.09806e+07	4.45112e+07
1,2-Benzisothiazolin-3-one@20.013-QP	2.1454e+07	3.20935e+07	2.96397e+07	2.46565e+07	5.80799e+07	3.4848e+07	5.59616e+07	4.63712e+07	3.39522e+06	3.25428e+07	3.0735e+07	3.43819e+07	2.65888e+07	8.74865e+07	5.07909e+07	5.63453e+07	2.98921e+07	4.85587e+07	3.67445e+07	5.45959e+07	4.83546e+07	3.78245e+07	7.82315e+07	4.89115e+07	4.32779e+07	3.17984e+07	3.72282e+07	4.08203e+07	3.08248e+07	1.36728e+07	3.69583e+07	1.89584e+07	8.72597e+07	3.61942e+07	3.45321e+07	3.4933e+07	5.59839e+07	2.17123e+07	2.66393e+07	7.27588e+07	2.16072e+07	2.66847e+07	1.21819e+08	2.60812e+07	1.84543e+07	5.89724e+07	3.94416e+07	2.1018e+07	1.86934e+07
1,2-Benzisothiazolin-3-one@9.603-QP	9.25464e+07	1.0957e+08	9.15133e+07	8.75914e+07	1.68967e+08	1.23985e+08	1.50819e+08	1.62528e+08	2.52398e+07	9.96176e+07	9.51987e+07	101079451	128414822	1.72735e+08	1.17359e+08	1.20175e+08	9.82028e+07	8.8142e+07	118571870	1.60232e+08	1.14602e+08	7.17367e+07	1.16124e+08	1.35718e+08	1.48018e+08	1.12962e+08	163596415	1.27586e+08	1.06849e+08	1.14294e+08	1.14912e+08	1.05688e+08	1.56935e+08	1.41829e+08	1.06399e+08	1.1037e+08	1.41974e+08	9.81608e+07	1.05538e+08	1.27002e+08	1.42984e+08	7.12617e+07	2.66064e+08	9.72777e+07	8.11329e+07	1.28618e+08	1.25722e+08	1.09136e+08	7.41266e+07
1,2-Benzisothiazolin-3-one@10.171-QP	4.58052e+06	5.76286e+06	5.11483e+06	4.9575e+06	8.64744e+06	7.51077e+06	9.4149e+06	8.74896e+06	1.25969e+06	5.2401e+06	5.53394e+06	5.89137e+06	7.3864e+06	9.04239e+06	5.83136e+06	6.66889e+06	4.95792e+06	5.9884e+06	5.65413e+06	9.29337e+06	5.7823e+06	3.56615e+06	6.23745e+06	7.14281e+06	8.92618e+06	6.24326e+06	8.43604e+06	6.21857e+06	5.5409e+06	5.81025e+06	6.17368e+06	5.35281e+06	9.12345e+06	7.70869e+06	6.01904e+06	5.31811e+06	8.00933e+06	5.36777e+06	5.56107e+06	7.50944e+06	7.60507e+06	4.10493e+06	1.50365e+07	3.94714e+06	4.05123e+06	6.22757e+06	6.57393e+06	5.91498e+06	4.39774e+06
151.02399@1-QP	1.03908e+07	1.1305e+07	9.58396e+06	1.31551e+07	1.17626e+07	1.13064e+07	9.57322e+06	1.09748e+07	3.91951e+06	9.78566e+06	1.044e+07	1.06911e+07	1.21797e+07	1.29174e+07	9.22787e+06	1.14304e+07	8.8456e+06	1.3857e+07	8.97008e+06	1.16852e+07	8.84791e+06	1.08499e+07	1.14098e+07	1.24769e+07	9.24338e+06	1.02408e+07	1.15162e+07	1.13674e+07	1.13599e+07	1.09444e+07	1.23111e+07	1.66149e+07	9.78558e+06	1.10319e+07	1.34454e+07	1.3504e+07	1.62592e+07	1.10718e+07	1.56857e+07	9.91717e+06	9.66626e+06	6.14488e+06	9.65666e+06	1.02374e+07	9.61711e+06	1.12844e+07	1.12581e+07	6.92575e+06	1.17935e+07
Guanine@1.841-QP	850365	158642	666584	139698	287198	611863	829592	203884	51403.4	522468	241246	179812	913420	339218	771277	679930	639548	180829	129161	167209	155879	338921	215878	192471	235059	400394	1.47683e+06	1.01418e+06	1.29441e+06	220604	215966	220126	1.27001e+06	3.00197e+06	483996	1.8743e+06	1.16823e+06	459923	730940	500569	1.90293e+06	542936	1.7303e+07	1.83117e+06	443103	1.41679e+06	5.35957e+06	237077	1.20835e+06
Guanine@2.974-QP	1.52206e+06	212387	598712	254314	608777	529498	672383	341960	45307.5	473894	162766	175398	436100	222660	322463	495139	1.85684e+06	303163	176381	289250	168616	165222	238941	231467	259974	248772	2.14929e+06	3.93222e+06	1.67562e+06	132693	324751	312369	308284	938305	206140	1.3628e+06	317370	298588	263925	286072	547184	1.02719e+06	316087	3.06502e+06	207472	2.23684e+06	2.41096e+06	4.89267e+08	351446
Guanine@2.488-QP	1.76204e+07	3.16231e+06	7.70824e+06	3.10874e+06	1.07608e+07	7.81909e+06	8.11914e+06	3.08971e+06	290175	4.9995e+06	1.44887e+06	488371	7.18077e+06	2.41407e+06	6.60032e+06	8.2596e+06	2.98553e+07	461232	1.43216e+06	359798	485914	1.19501e+06	709865	3.83396e+06	3.71923e+06	4.89943e+06	2.71883e+07	5.75019e+07	2.59055e+07	792478	4.32625e+06	4.59201e+06	5.7849e+06	1.30666e+07	4.06805e+06	2.39414e+07	4.21042e+06	893960	3.8588e+06	4.03439e+06	1.07511e+07	1.33124e+07	3.45246e+06	4.81424e+07	2.19943e+06	3.22802e+07	3.87337e+07	4.91059e+07	7.96045e+06
Paracetamol@7.488-QP	188036	863869	1.28044e+06	228939	139747	151844	2.06446e+06	216517	409087	255760	1.09366e+06	8.6045e+07	2.4286e+06	3.76426e+06	331317	4.78169e+06	1.65174e+06	571090	68038.3	116714	219964	239113	173049	375053	213761	117947	414985	1.15498e+06	86289.7	1.87198e+06	2.00065e+06	831464	1.14518e+06	54669.1	1.73085e+06	1.32896e+06	500338	1.24394e+06	1.04814e+06	778843	2.85062e+06	502750	258687	528244	650792	675392	3.30695e+07	641757	165470
Paracetamol@4.171-QP	1.40314e+06	1.74057e+06	3.54184e+08	1.40794e+06	686050	484952	3.34427e+08	1.04225e+06	3.92404e+07	8.42884e+06	1.98681e+08	1.28266e+06	1.0098e+06	9.2492e+08	1.96895e+06	934061	1.02e+06	1.58299e+07	6.85824e+06	2.35728e+07	342223	1.42977e+07	703111	627551	648190	829285	6.77576e+07	1.09797e+06	672458	668796	3.76541e+08	1.72448e+08	1.91944e+06	1.16736e+06	3.05095e+08	1.84022e+06	1.10445e+06	837485	3.01766e+07	3.32462e+08	3.27716e+08	4.51341e+07	1.63588e+06	1.7841e+06	577338	795380	1.49452e+06	835126	700818
2-Acetamidophenol@4.753-QP	4.25826e+07	2.40947e+07	9.41248e+08	1.58915e+07	2.47906e+06	9.31809e+06	1620164729	5.94626e+06	3.47053e+08	5.97831e+07	5.35028e+08	4.58558e+06	2.32022e+07	1982380458	1.37847e+07	1.46344e+07	8.32846e+06	9.5285e+07	4.16996e+07	1.46922e+08	5.74939e+06	8.79643e+07	1.0236e+07	1.56883e+07	6.20486e+06	9.79986e+06	2.32097e+08	1.09852e+07	6.38539e+06	1.23393e+07	1263957692	6.71589e+08	1.58415e+07	7.39431e+06	1954139358	1.17709e+07	1.64104e+07	4.87593e+07	1.28534e+08	6.08832e+08	1512745916	2.17596e+08	1.26375e+07	7.44849e+06	5.08162e+06	6.70932e+06	5.90277e+06	1.84403e+07	1.63613e+07
Paracetamol@3.264-QP	4.2086e+07	1.6327e+07	1142450725	2.97409e+06	861628	424994	1080866100	927014	4.09064e+08	2.12627e+07	8.6955e+08	1.96833e+06	964023	2109893228	1.02119e+06	1.30511e+06	1.15999e+06	6.66289e+07	3.18999e+07	1.49005e+08	759998	5.80422e+07	859436	682265	666960	1.16609e+06	3.0325e+08	914877	713030	759504	1477269352	2.3879e+08	1.30079e+06	1.51823e+06	6.43171e+08	658264	1.63699e+06	1.0205e+06	1.076e+08	1081496244	4.27819e+08	1.51689e+08	1.15863e+06	2.08662e+06	1.13175e+06	816452	1.134e+06	792023	2.18064e+06
151.89312@0.987-QP	1.19884e+08	7.73312e+07	125598446	8.94798e+07	8.27059e+07	9.20881e+07	1.0654e+08	1.30148e+08	3.37458e+07	103810963	1.276e+08	8.15453e+07	7.84101e+07	1.26491e+08	8.6169e+07	1.2974e+08	7.44328e+07	7.92834e+07	7.43368e+07	8.41017e+07	1.12185e+08	9.87697e+07	7.8955e+07	1.17103e+08	8.73714e+07	9.96995e+07	8.37786e+07	1.31173e+08	1.33351e+08	7.81596e+07	1.37873e+08	1.50301e+08	8.59989e+07	135413915	8.67532e+07	1.2985e+08	8.90077e+07	1.48172e+08	128366808	1.2678e+08	7.61419e+07	1.28612e+08	1.33664e+08	6.59211e+07	1.29445e+08	1.34634e+08	1.31586e+08	1.22936e+08	1.35541e+08
Xanthine@2.292-QP	1.09541e+08	7.12225e+07	1.28341e+08	4.47583e+07	2673195169	1.24454e+08	1.41814e+08	1.22114e+08	9.62262e+06	2.10591e+08	1.2276e+08	8.20861e+07	5.34157e+07	9.65509e+07	8.01328e+07	1112894300	1042636131	1.01924e+08	1.32564e+08	9.26602e+07	116245922	6.43026e+07	1.05315e+08	254363543	1.43275e+08	5.52942e+07	1.07944e+08	1.18853e+08	8.4925e+07	1.36903e+08	1.46857e+08	1.65876e+08	1180961479	5.5319e+07	5.22785e+07	9.29259e+07	1.41063e+08	9.05319e+07	7.54985e+07	1.9005e+08	7.6803e+07	1.48014e+08	1.85505e+08	9.43388e+07	4.35601e+07	1.7061e+08	9.79447e+07	6.51601e+07	5.31665e+07
2-Hydrazinonicotinate@9.587-QP	84605.3	298445	204738	139469	270824	198243	124739	245651	185065	412913	292798	184374	183126	1.40854e+06	148540	349042	287978	314026	88842.5	137791	279193	342392	165073	77287.4	292559	117373	169795	380573	174427	622055	617105	201158	340855	192035	289574	361623	262501	270576	200084	297737	233124	205164	196333	345023	324430	376046	409895	233802	320107
2-Hydrazinonicotinate@7.249-QP	336814	2.03991e+06	197561	237201	1.18817e+06	1.56605e+06	293742	5.58511e+07	27393.5	428889	2.27811e+07	274511	321241	6.08879e+07	1.98918e+06	461627	289991	269026	3.1868e+07	2.67168e+06	1.73829e+06	2.4086e+07	465472	245181	264060	198637	309173	2.25434e+07	6.2506e+06	341328	8.67415e+06	479454	193840	2.74664e+06	233699	2.38348e+07	2.83137e+07	4.58559e+06	228999	1.59219e+06	118094	533368	187373	267428	1.24126e+07	852993	3.35619e+07	1.3135e+07	211336
2-Hydrazinonicotinate@12.351-QP	1.00729e+06	7.47858e+06	1.4495e+06	3.34315e+06	3.10056e+06	183932	613100	3.12286e+06	32311.5	1.2324e+06	1.99749e+06	535672	1.51818e+06	792994	7.40194e+06	5.73117e+06	2.07582e+06	135165	1.18388e+06	569611	4.22695e+06	373499	5.57998e+06	1.9395e+06	1.16738e+06	546924	849282	379892	893741	927190	836282	167749	2.31148e+06	1.05428e+06	807712	2.22119e+06	3.75998e+06	672433	1.55278e+06	2.3078e+06	1.36918e+06	272882	2.25063e+06	1.06675e+06	497547	586260	5.13609e+06	2.26903e+06	2.43027e+06
2-hydroxyphenylaceticacid@5.76-QP	728023	1.80493e+06	1.11175e+06	1.06732e+06	1.13808e+06	813337	1.2844e+06	1.56307e+06	224358	1.35129e+07	6.97598e+06	3.93408e+07	1.35954e+06	2.65222e+06	3.12566e+06	1.34353e+06	1.19541e+06	2.16122e+06	3.61095e+06	1.0204e+06	588474	1.08814e+06	781484	1.15196e+06	685072	716930	707026	551684	744173	1.5425e+06	3.49579e+06	573156	7.13223e+06	1.13586e+06	1.96108e+06	2.73641e+06	1.40809e+06	2.09144e+06	1.51739e+06	1.11284e+06	1.44747e+06	831816	813463	1.47773e+06	840216	973989	2.36312e+06	1.03038e+07	4.081e+06
Vanillin@8.517-QP	3.00804e+06	1.14628e+06	291229	322234	296112	375994	1.85388e+06	442639	260638	436501	417538	480129	272416	416204	270785	603326	395299	1.30678e+06	494194	326423	355163	8.83922e+06	318813	250915	271300	576626	297410	370228	568181	7.64686e+07	194284	1.75605e+06	527720	2.59092e+07	315418	489294	417792	1.31993e+06	589089	334435	327637	243376	1.05036e+07	298884	487090	1.10903e+06	890515	481884	418575
2-amino-4-nitrotoluene@3.338-QP	1.54771e+08	6.86879e+07	7.2256e+07	2.7438e+07	1.31745e+08	2.77876e+07	5.60993e+07	1.15382e+08	3.58314e+06	3.70551e+08	2.37465e+07	4.87972e+07	185854401	5.85453e+07	1.45962e+08	1.16452e+08	1.00236e+08	7.86367e+07	1.32747e+08	4.88578e+07	1.00109e+08	2.33054e+07	110171361	7.58417e+07	3.28676e+07	1.13173e+08	1.12353e+08	1.77166e+07	7.21074e+07	7.99421e+07	5.37849e+07	4.88332e+07	8.2055e+07	1.0174e+08	8.67752e+06	8.26133e+07	1.75212e+08	5.84458e+07	4.40927e+07	1.13539e+08	4.77199e+07	2.01386e+07	134020164	7.39256e+07	6.06932e+07	7.65278e+07	6.00238e+07	9.42011e+07	6.0915e+07
2-amino-4-nitrotoluene@4.133-QP	4.38548e+07	1.91356e+07	2.06762e+07	5.91051e+06	3.07969e+07	6.9585e+06	1.41687e+07	3.04171e+07	1.30745e+06	8.04617e+07	6.59555e+06	1.17453e+07	4.36635e+07	1.42045e+07	2.87676e+07	2.65246e+07	2.26365e+07	1.75405e+07	2.69253e+07	1.16097e+07	2.05536e+07	5.02157e+06	2.5618e+07	1.54434e+07	6.59018e+06	2.3567e+07	2.72856e+07	3.67541e+06	1.53489e+07	1.80691e+07	1.38892e+07	9.89728e+06	1.81106e+07	2.24154e+07	2.07792e+06	1.79318e+07	3.95119e+07	1.18391e+07	1.08982e+07	3.00537e+07	1.14274e+07	4.81774e+06	3.21732e+07	1.47697e+07	1.33232e+07	1.66116e+07	1.2305e+07	1.9167e+07	1.16922e+07
152.1192@12.35-QP	1.03014e+07	5.01476e+07	9.4649e+06	1.86495e+07	2.12729e+07	931828	3.85523e+06	2.65391e+07	78256.6	9.85026e+06	1.35848e+07	3.81796e+06	1.10173e+07	5.35028e+06	5.26454e+07	4.32585e+07	1.6239e+07	539783	7.72165e+06	3.3914e+06	3.25441e+07	2.32278e+06	4.04486e+07	1.57854e+07	7.80382e+06	4.55783e+06	5.47292e+06	2.41129e+06	6.37238e+06	6.08427e+06	5.62249e+06	835549	1.57225e+07	7.54625e+06	4.56456e+06	1.59324e+07	2.85101e+07	4.4605e+06	1.20368e+07	1.77472e+07	1.10387e+07	2.00744e+06	1.82376e+07	7.34651e+06	4.78716e+06	3.49603e+06	3.75268e+07	1.7662e+07	1.78182e+07
153.01699@2.263-QP	5.28637e+06	3.77407e+06	6.87047e+06	1.84369e+06	2.82435e+07	6.64615e+06	7.21711e+06	6.27006e+06	1.01624e+06	10406961	6.34562e+06	4.45486e+06	2.75566e+06	4.80123e+06	3.85925e+06	7.70116e+06	4.94856e+06	5.18632e+06	6.75501e+06	4.7651e+06	5.88151e+06	3.12311e+06	5.36508e+06	1.32827e+07	6.76628e+06	2.72943e+06	5.24002e+06	5.36345e+06	4.09759e+06	6.92407e+06	6.82055e+06	8.18594e+06	6.78404e+06	2.34733e+06	2.47014e+06	4.29182e+06	7.093e+06	4.50199e+06	3.60002e+06	9.06934e+06	3.8898e+06	5.62229e+06	8.38795e+06	4.58106e+06	2.09506e+06	8.26159e+06	4.82722e+06	3.20914e+06	2.58129e+06
3-hydroxy-2-methylpyridine-5-carboxylicacid@4.131-QP	1.01375e+07	4.76507e+06	7.72617e+06	1.45089e+06	9.18596e+06	1.54735e+06	5.40541e+06	8.30591e+06	341648	2.53079e+07	2.24286e+06	2.9234e+06	1.24857e+07	5.71141e+06	8.16692e+06	8.09111e+06	6.63876e+06	5.13616e+06	7.871e+06	3.418e+06	5.89415e+06	1.45636e+06	7.37056e+06	4.30209e+06	1.89423e+06	7.28836e+06	9.4415e+06	884423	4.77534e+06	5.84516e+06	5.03499e+06	3.59665e+06	5.87044e+06	6.65061e+06	718837	5.4689e+06	1.19104e+07	3.12348e+06	3.19866e+06	1.13626e+07	3.95496e+06	1.30624e+06	1.01906e+07	4.57623e+06	3.81892e+06	4.82458e+06	4.23978e+06	6.38304e+06	3.78942e+06
2-dimethylaminoethylphosphonicacid@9.798-QP	342395	1.29025e+08	173740	110960	89793.5	90984.2	146152	97137.6	50649.5	63211.1	81975.8	147461	216106	147273	162140	267091	154797	147588	56601.2	65757	52436.8	52131.3	59474.1	68642.8	62286.6	200025	221974	101809	253433	71823.7	64718.6	179328	1.3091e+06	158533	87762.5	164251	274859	58102.9	176638	271559	262958	158748	207336	150033	168036	99366	162569	54203.4	129912
Dopamine@5.713-QP	219989	191507	235837	55133.6	294953	212028	70736.2	230290	53616.3	336381	219480	7.51054e+07	258376	2.05098e+07	299748	98715.5	50157.9	173310	231354	283377	190856	174276	293677	51251.3	230842	229157	307178	225337	214656	263389	248902	271139	235337	268805	243748	273229	246646	345382	235709	273205	52257.4	175719	2.88872e+07	221513	46382.6	308892	259927	293428	182963
Pseudopelletierine@2.954-QP	735496	798053	797257	955593	854868	912637	960734	619618	170245	821638	611599	659063	1.01132e+06	836652	1.21167e+06	814374	984359	1.13915e+06	662758	1.08687e+06	633581	431723	897828	869747	976862	934769	1.07016e+06	903732	577833	498597	866807	443484	646454	832634	774578	754547	1.00944e+06	728916	742606	610198	760843	613939	1.18771e+06	892875	779584	965067	932442	880730	665000
154.03491@0.995-QP	1.96182e+07	1.58449e+07	1.95599e+07	2.38133e+07	1.94158e+07	1.75032e+07	1.78755e+07	3.37746e+07	9.59283e+06	3.53889e+07	1.78212e+07	1.93075e+07	1.97527e+07	1.42631e+07	1.2294e+07	1.63374e+07	1.92127e+07	1.69937e+07	1.35668e+07	1.96027e+07	1.53871e+07	1.18176e+07	2.03392e+07	1.54479e+07	1.61388e+07	2.4267e+07	2.45919e+07	1.52885e+07	1.15296e+07	1.43487e+07	2.60427e+07	2.79078e+07	2.57522e+07	1.17274e+07	1.81579e+07	2.13572e+07	1.55173e+07	31301947	2.03085e+07	3.03489e+07	1.80217e+07	1.38516e+07	1.79311e+07	1.81936e+07	2.02928e+07	1.42583e+07	1.24631e+07	2.1277e+07	1.65519e+07
154.0367@1.368-QP	39738.6	37606	241880	38878.2	6.6465e+06	238409	6.63522e+06	6.23641e+06	1.23911e+06	1.98375e+07	5.68266e+06	7.312e+06	7.7012e+06	7.17697e+06	6.66443e+06	7.25617e+06	4.43206e+06	4.93366e+06	4.19111e+06	5.42874e+06	3.3957e+06	3.10328e+06	4.34842e+06	4.97184e+06	5.2411e+06	3.86513e+06	6.85405e+06	4.755e+06	5.03983e+06	7.6847e+06	6.17231e+06	5.47728e+06	4.92484e+06	4.97866e+06	2.68301e+06	6.70321e+06	7.0088e+06	1.23365e+07	4.98603e+06	1.10789e+07	5.16719e+06	4.17029e+06	6.59945e+06	4.53496e+06	3.97044e+06	4.41045e+06	4.61268e+06	8.52644e+06	4.12341e+06
[truncated: 3,983 more rows]
[truncated: 178 more columns]

## Sheet: AreaQCCorr
Supplementary Table 2. Untargeted metabolomics.
[truncated: 4,277 more rows]
[truncated: 178 more columns]

## Sheet: FoldChangeLog2
Supplementary Table 2. Untargeted metabolomics.
	Control/Mild	Control/Moderate/Severe	Mild/Moderate/Severe
[truncated: 4,276 more rows]

## Sheet: pvalue
Supplementary Table 2. Untargeted metabolomics.
[truncated: 4,277 more rows]

[truncated: 1 more sheets: Adj-pvalue]
